# Supplementary material for: Identification of a transporter complex responsible for the cytosolic entry of nitrogen-containing bisphosphonates
Source: eLife journal article supplement (doi:10.7554/elife.36620), 2018-05-10
Supplement: supp [file elife-36620-supp-v1.zip]

Archive with 9 entries (9 files):
- elife_poa_e36620_Figure_2_figure_supplement_2.docx
- elife_poa_e36620_Figure_2_figure_supplement_1.docx
- elife_poa_e36620_Figure_4_figure_supplement_1.docx
- elife_poa_e36620_Transparent_Reporting_File.pdf
- elife_poa_e36620_Supplementary_File_2.xlsx
- elife_poa_e36620_Supplementary_File_1.xlsx
- elife_poa_e36620_Figure_3_figure_supplement_2.docx
- elife_poa_e36620_Figure_3_figure_supplement_1.docx
- elife_poa_e36620_Figure_1_figure_supplement_1.docx
