# Supplementary material for: Identification of a transporter complex responsible for the cytosolic entry of nitrogen-containing bisphosphonates
Source: eLife journal article supplement (doi:10.7554/elife.36620), 2018-05-10
Supplement: supp [file elife-36620-supp-v1.zip › elife_poa_e36620_Figure_2_figure_supplement_1.docx]

**
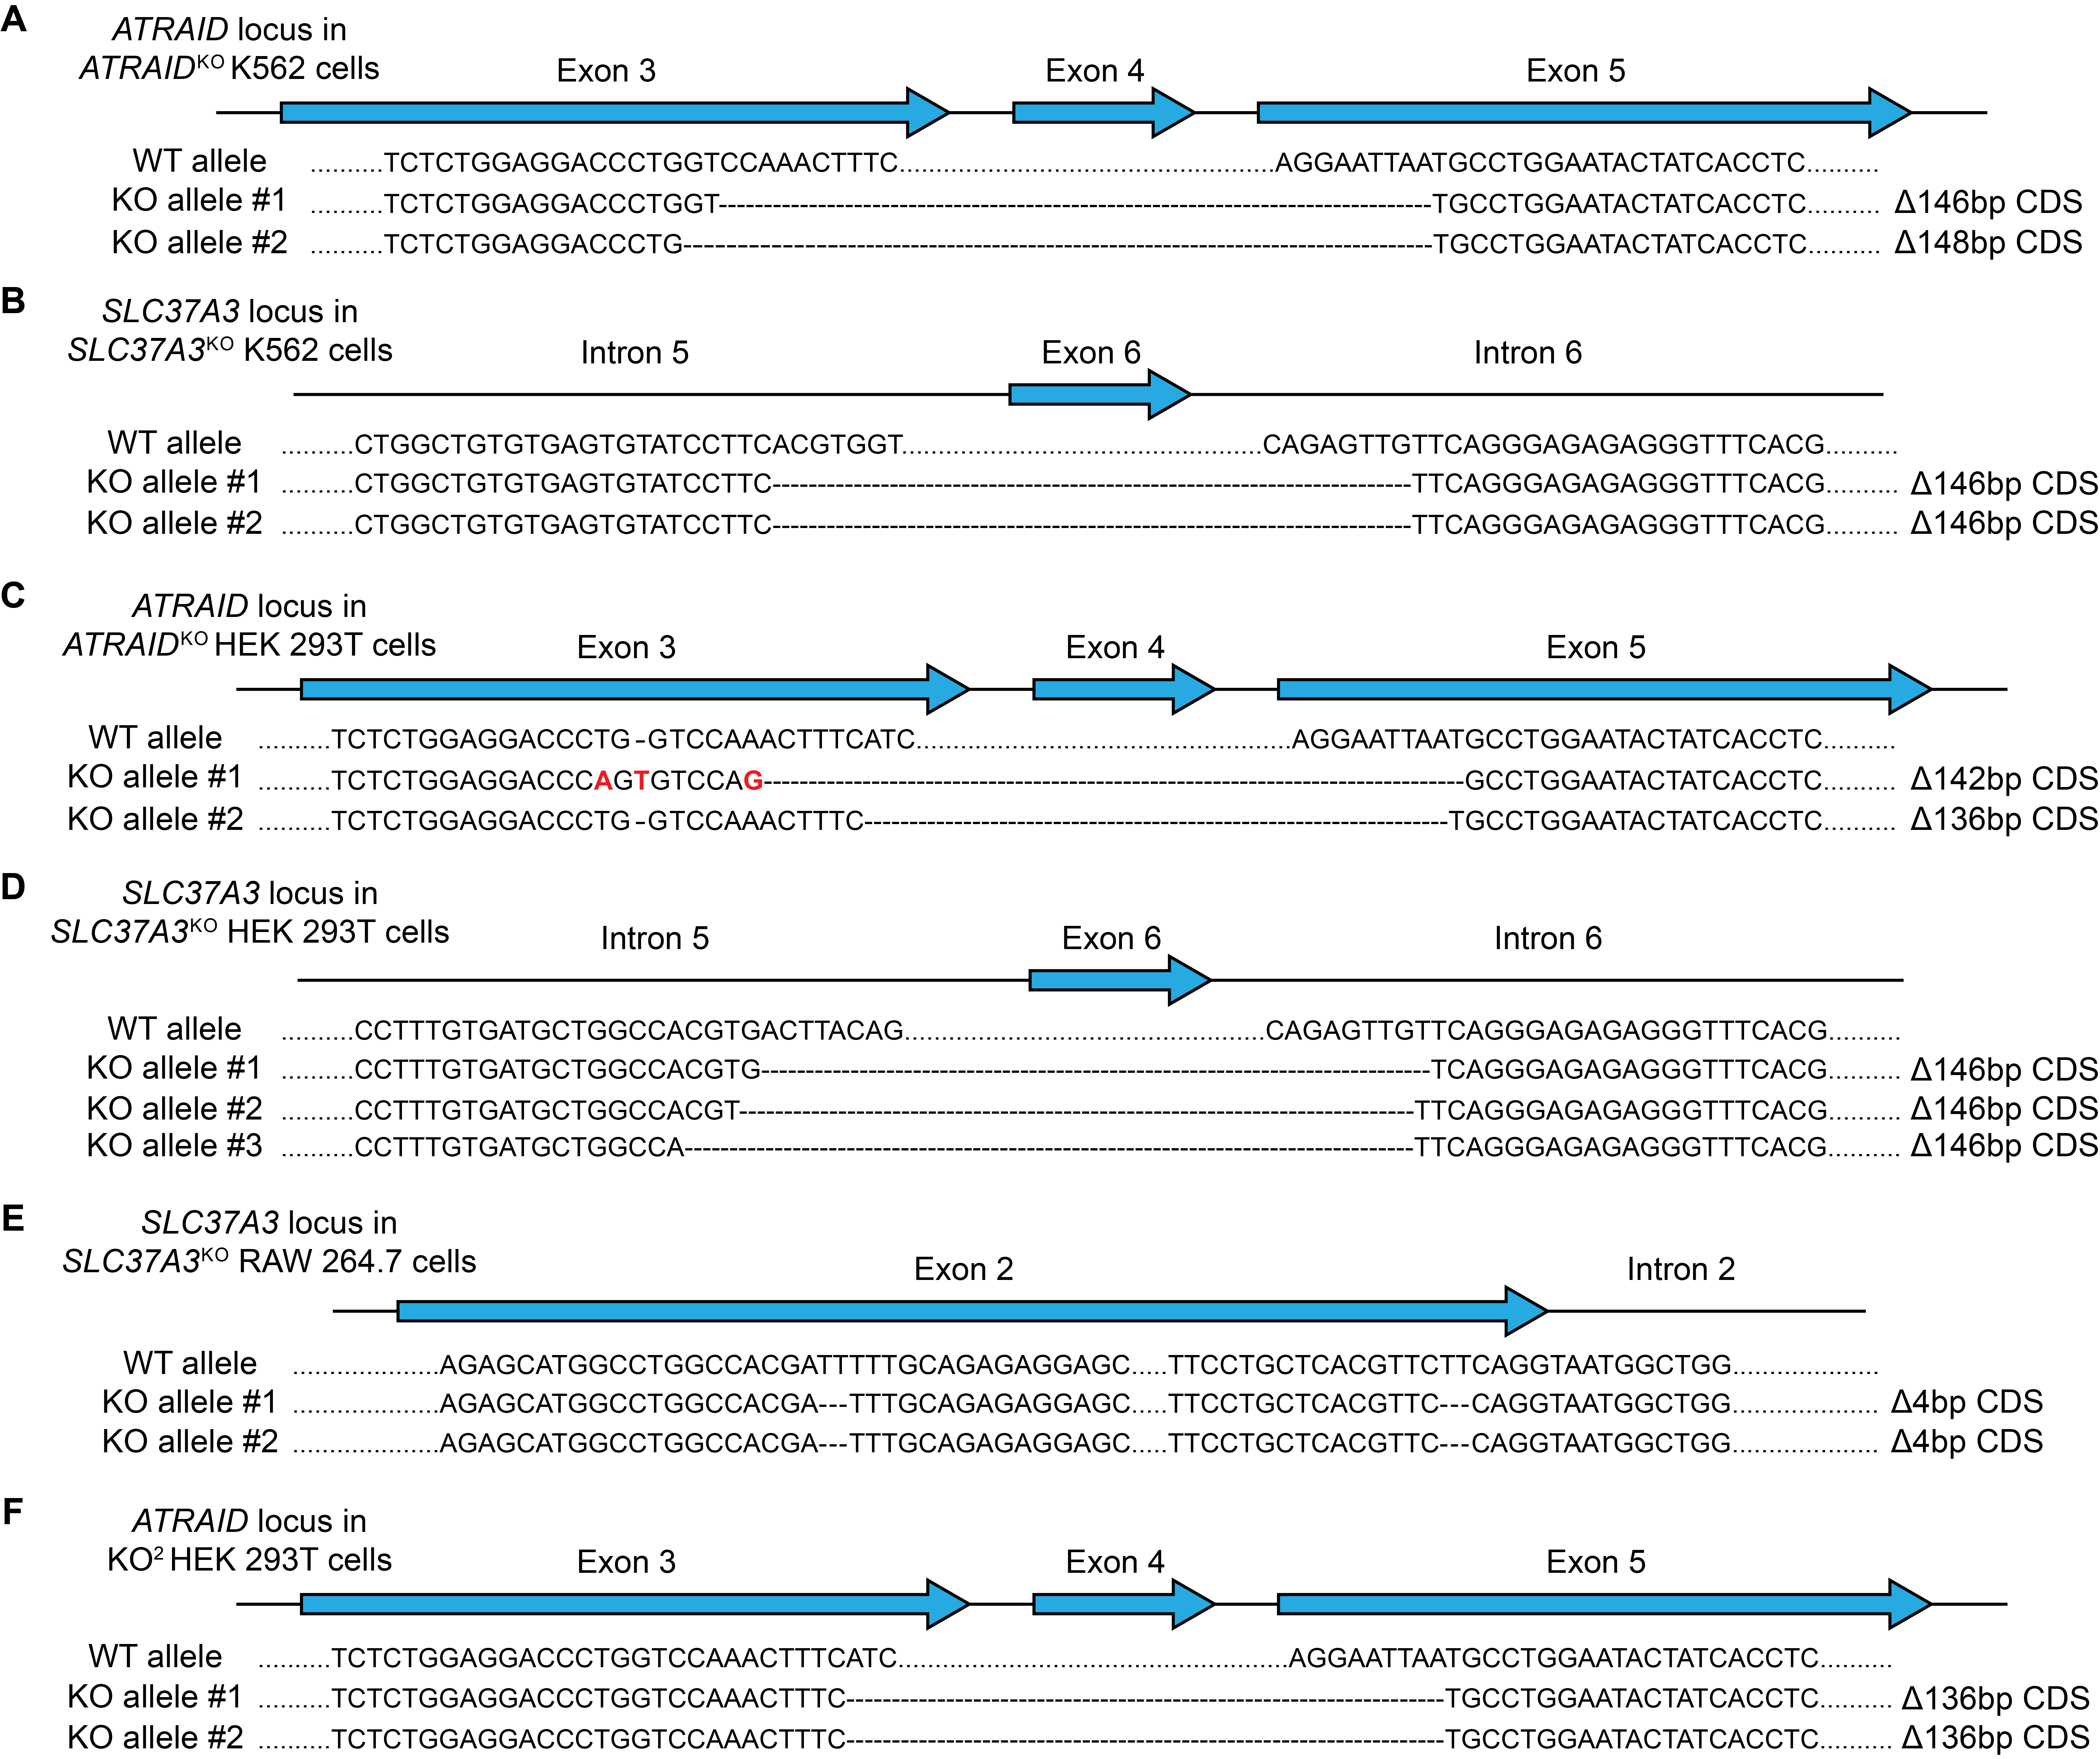
**

**Figure 2 – figure supplement 1 Genotypes of knockout cells used in this study.** (**A**-**F**) Sequences of the *ATRAID* (**A**, **C** and **F**) or *SLC37A3* locus (**B**, **D** and **E**) in *ATRAID*­KO (**A**) and *SLC37A3*KO (**B**)K562 cells, *ATRAID*­KO (**C**), *SLC37A3*KO (**D**) and KO2 (**F**) HEK 293T cells, and *SLC37A3*KO (**E**) RAW 264.7 cells, showing that truncations in *ATRAID* and *SLC37A3* coding sequences (CDS) have caused frame shifts in the knockout cell lines. The *SLC37A3* locusin KO2HEK 293T cells is identical to that in *SLC37A3*KO HEK 293T cells. Introns and exons are not drawn to scale. Note that more than 2 alleles are present for the *SLC37A3*locus in HEK 293T cells as these cells are hypo-triploidic. KO2: *ATRAID*KO; *SLC37A3*KO.
