# Supplementary material for: Identification of a transporter complex responsible for the cytosolic entry of nitrogen-containing bisphosphonates
Source: eLife journal article supplement (doi:10.7554/elife.36620), 2018-05-10
Supplement: supp [file elife-36620-supp-v1.zip › elife_poa_e36620_Figure_2_figure_supplement_2.docx]

**
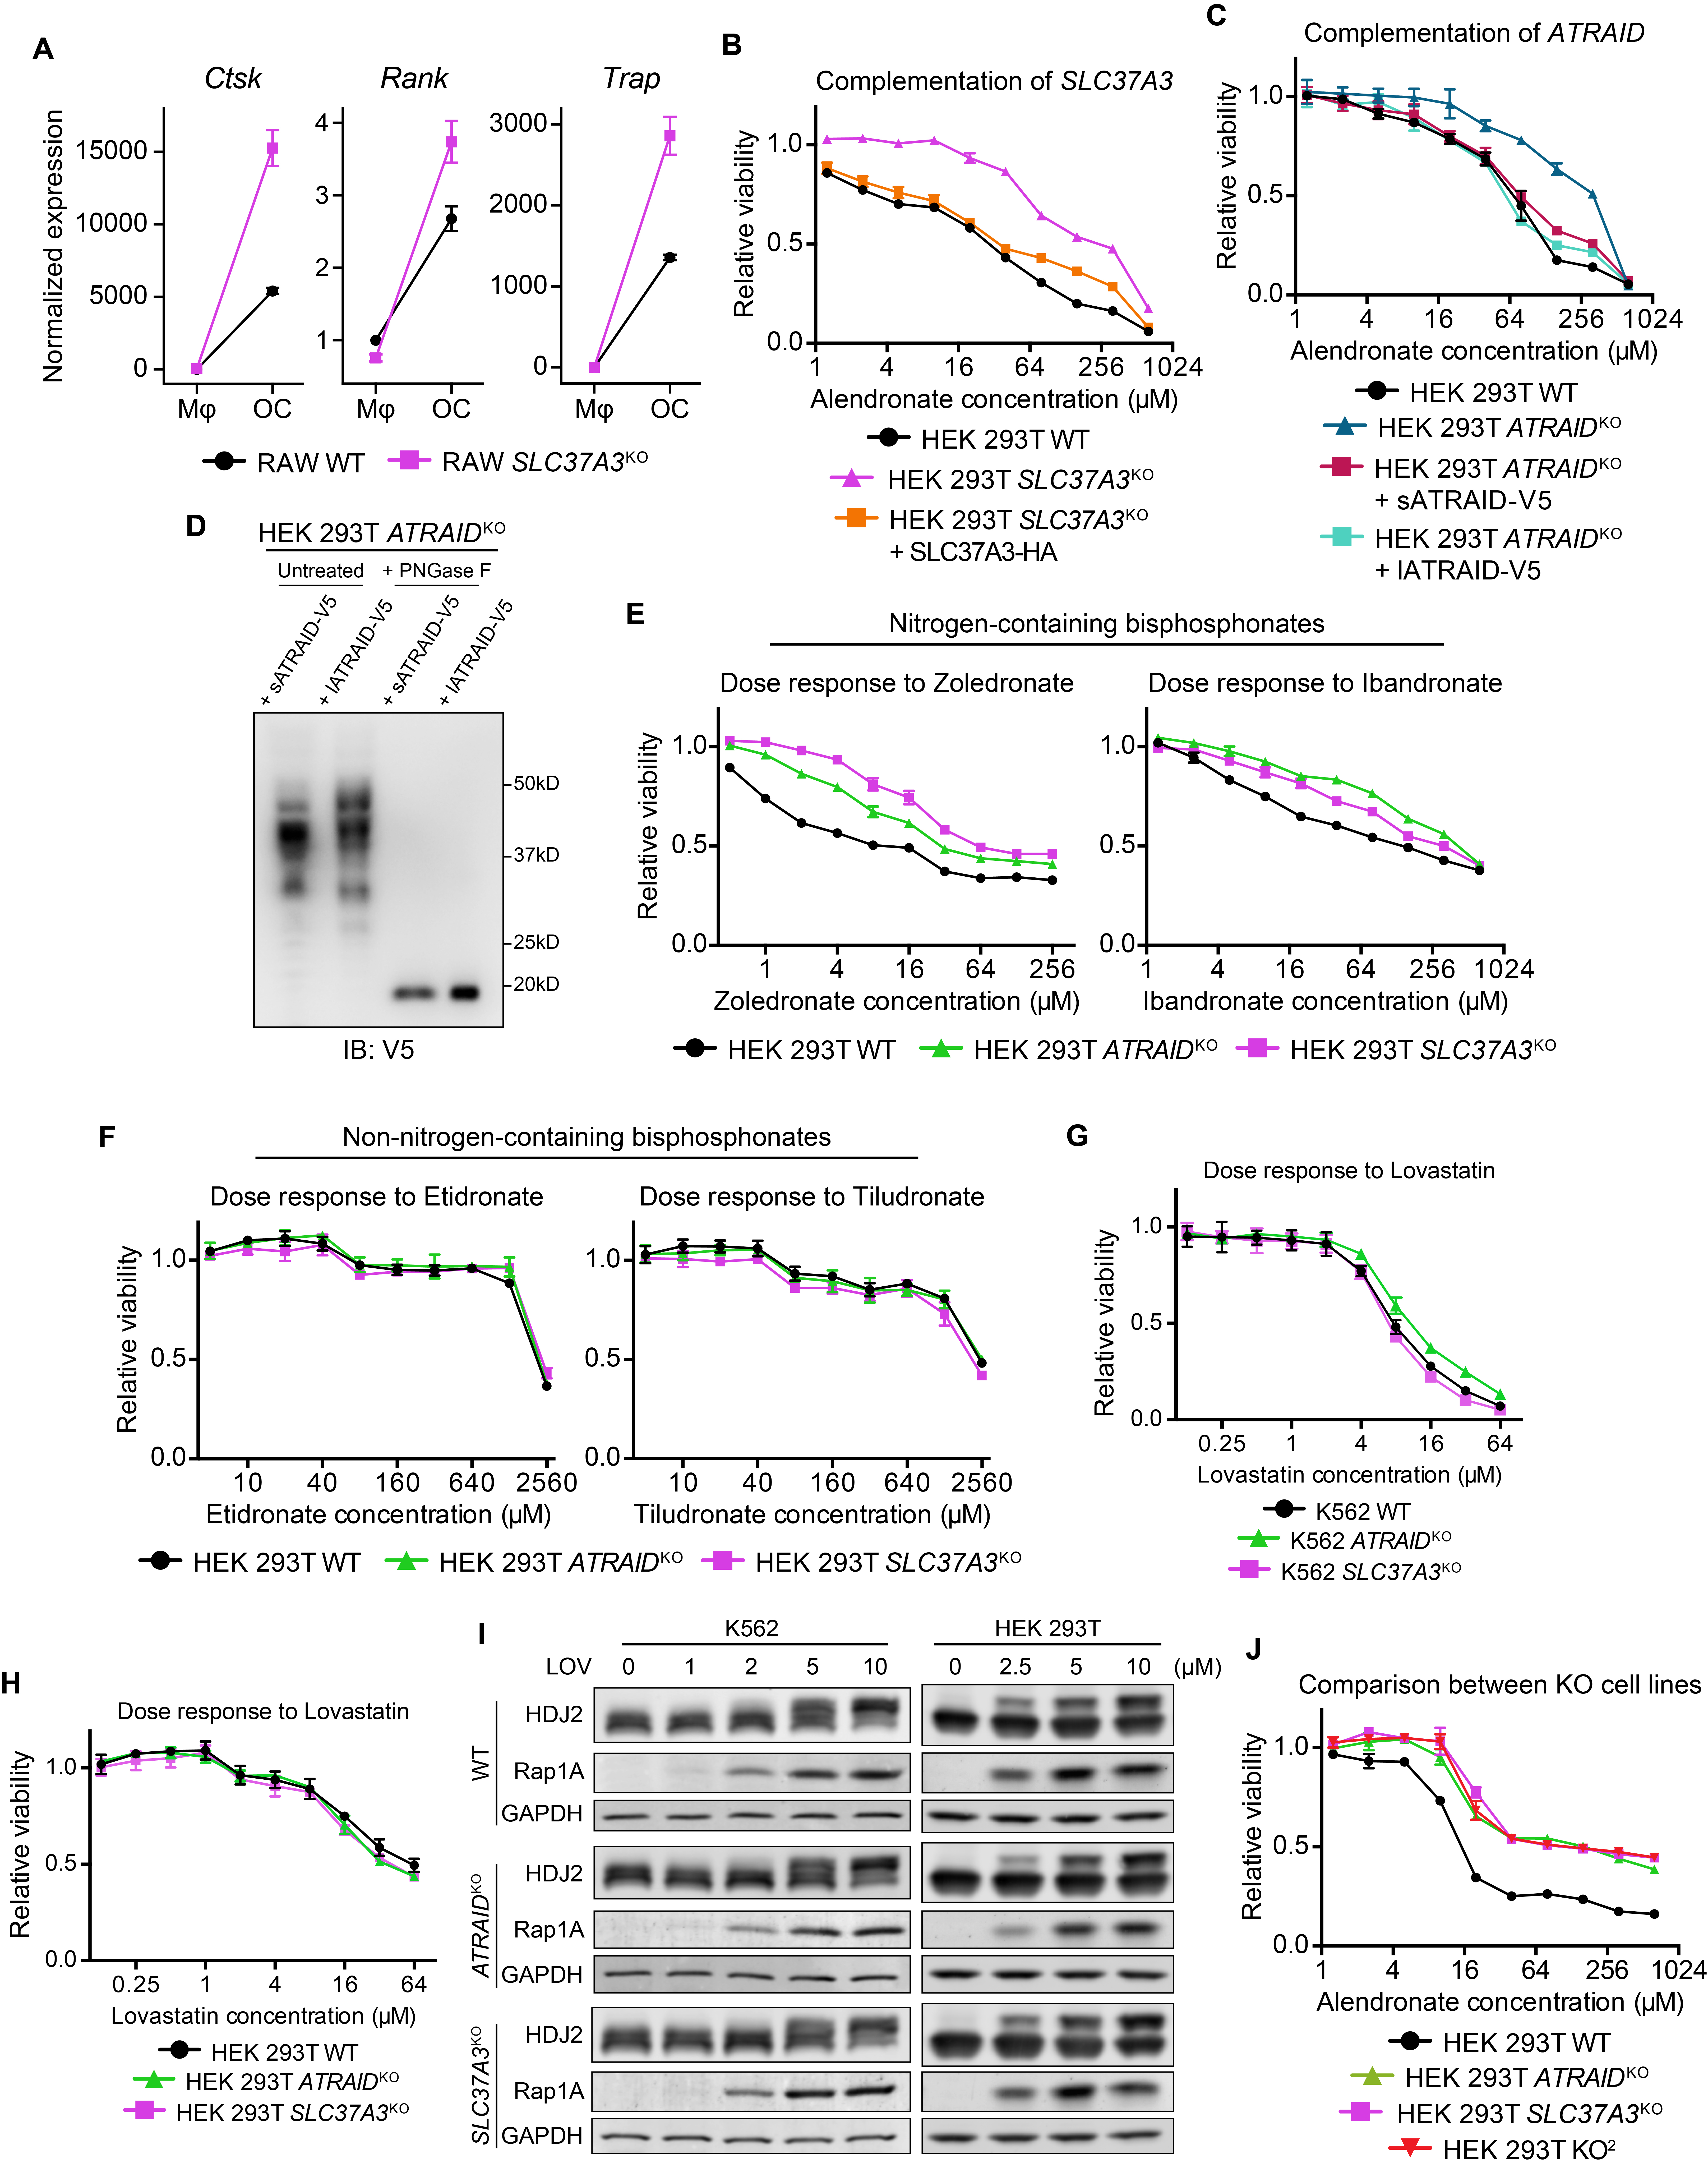
**

**Figure 2 – figure supplement 2 Additional evidence that validates *SLC37A3* and *ATRAID* as functionally related genes required for the mechanism of action of N-BPs.** (**A**)Expression of osteoclast markers (*Ctsk, Rank* and *Trap*) in undifferentiated RAW macrophages (Mφ) and differentiated RAW osteoclasts (OC), demonstrating successful differentiation of RAW cells. (**B**-**C**) Dose responses to alendronate in *SLC37A3*KO or *ATRAID*KO HEK 293T cells complemented with epitope tagged SLC37A3 or ATRAID, respectively, compared with those in wild-type, *ATRAID*KO and *SLC37A3*KO cells. (**D**) Immunoblot comparing the short isoform of ATRAID (sATRAID) with the long isoform of ATRAID (lATRAID), showing that the long isoform of ATRAID is expressed as the same protein as the short isoform of ATRAID. Note that unequal amount of protein was loaded in each lane to obtain even exposure. The amount of protein loaded from left to right was: 100 µg, 40 µg, 10 µg and 4 µg, respectively. (**E**-**F**)Dose response curves of wild-type, *ATRAID*KO and *SLC37A3*KO HEK 293T cells to nitrogen-containing-bisphosphonates (**E**) and non-nitrogen-containing-bisphosphonates (**F**). (**G**-**H**) Dose response curves of wild-type, *ATRAID*KO and *SLC37A3*KO K562 cells (**G**) and HEK 293T cells (**H**) to lovastatin. (**I**) Immunoblots measuring lovastatin-induced reduction in protein prenylation in wild-type, *ATRAID*KO and *SLC37A3*KO K562 cells and HEK 293T cells. (**J**) Dose response to alendronate in KO2 HEK 293T cells, compared with those in wild-type, *ATRAID*KO and *SLC37A3*KO cells.For **B**-**C**, **E**-**H** and **J**, data depict mean with s.d. for biological triplicate measurements. LOV: lovastatin. KO2: *ATRAID*KO; *SLC37A3*KO. PNGase F: peptide: N-glycosidase F, an enzyme that removes asparagine (N)-linked sugar modifications on glycoproteins.
