# Supplementary material for: Identification of a transporter complex responsible for the cytosolic entry of nitrogen-containing bisphosphonates
Source: eLife journal article supplement (doi:10.7554/elife.36620), 2018-05-10
Supplement: supp [file elife-36620-supp-v1.zip › elife_poa_e36620_Figure_3_figure_supplement_1.docx]

**
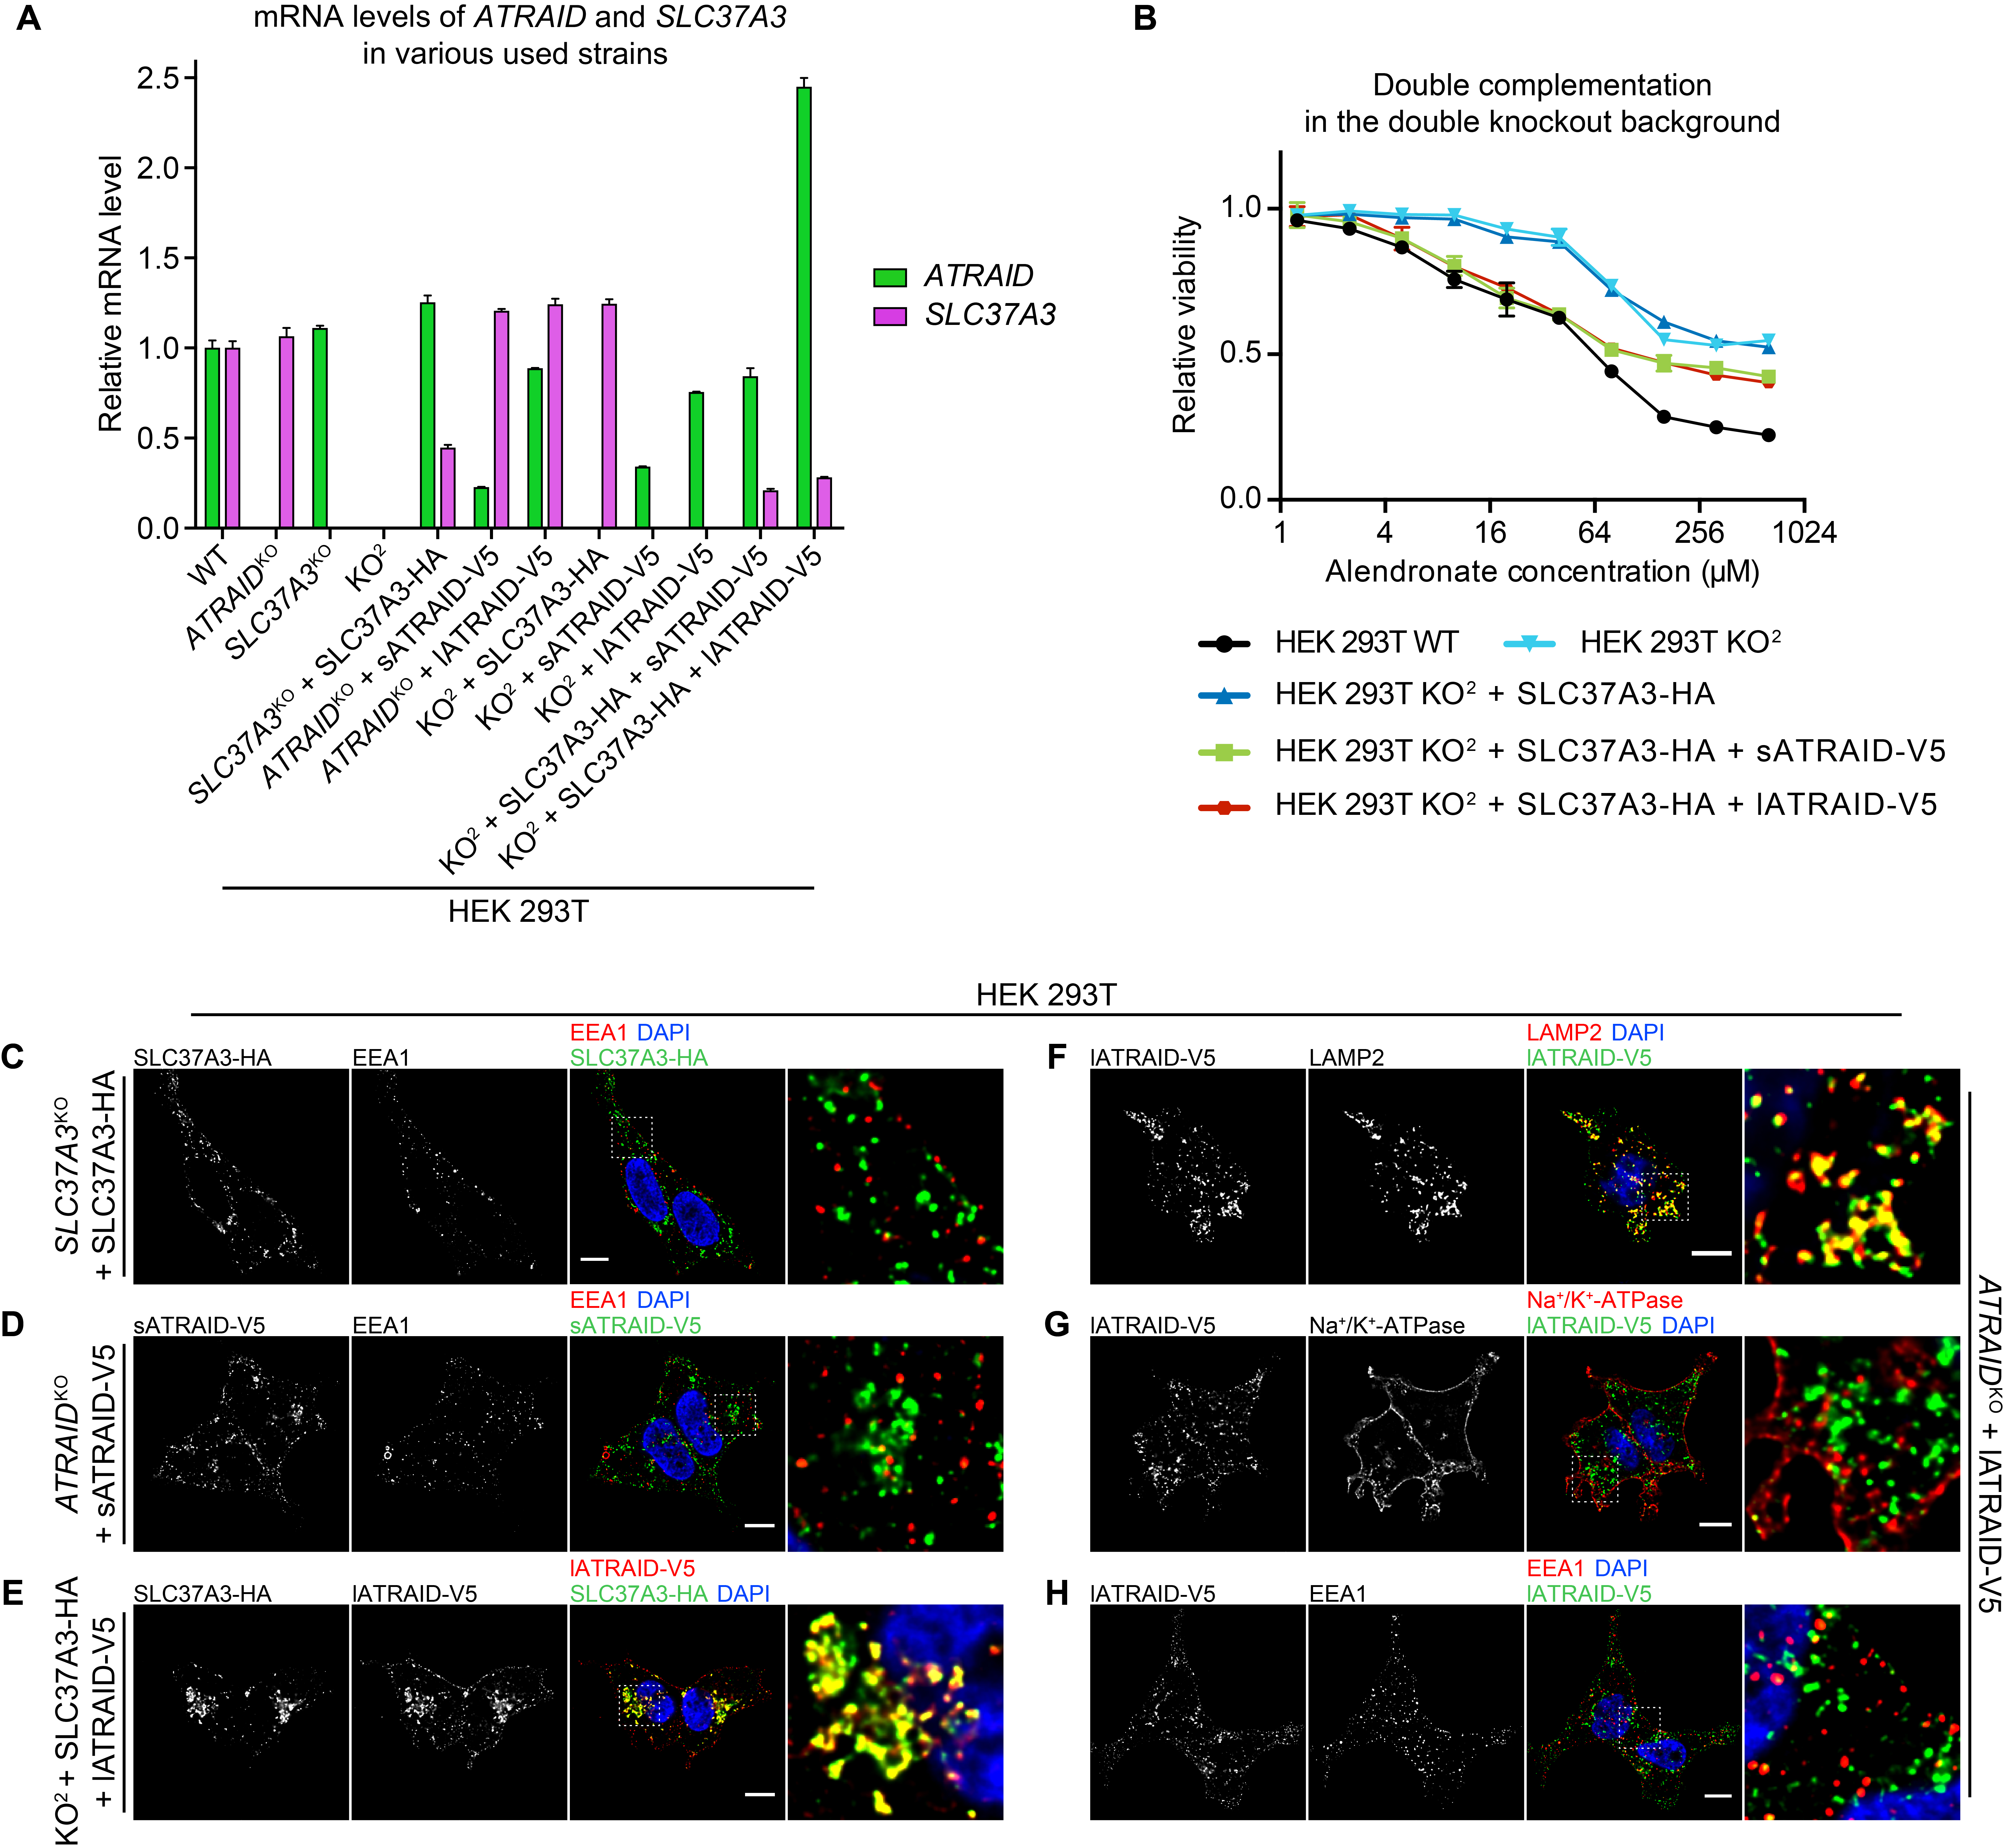
**

**Figure 3 – figure supplement 1 Additional evidence supporting that SLC37A3 and ATRAID form a lysosomal complex.** (**A**) mRNA levels of *ATRAID* and *SLC37A3* in various HEK 293T cells used in this study. Data depict mean and s.d. for technical triplicate measurements. (**B**)Dose responses to alendronate in KO2 HEK 293T cells complemented with either only SLC37A3-HA or both ATRAID-V5 and SLC37A3-HA, compared with those in wild-type and KO2 HEK 293T cells. Data depict mean and s.d. for biological triplicate measurements. (**C**-**H**) Localization of SLC37A3-HA (**C**), sATRAID-V5 (**D**) or lATRAID-V5 (**F**-**H**) shown with LAMP2 (**F**), EEA1 (**C, D** and **H**) and Na+/K+-ATPase (**G**), and co-localization of SLC37A3-HA and lATRAID-V5 (**E**). Scale bars represent 10 µm. Each image displayed is the representative example chosen from at least five similar images. Note that in **E**, there exists a subpopulation of lATRAID-V5 that localizes to the plasma membrane but not with SLC37A3-HA. Such distribution is likely a result of a higher-than-endogenous expression level of lATRAID-V5 in KO2 + SLC37A3-HA + lATRAID-V5 HEK 293T cells (**A**), as such distribution is not observed in *ATRAID*KO + lATRAID-V5 HEK 293T cells (**G**), which express lATRAID-V5 at a lower-than-endogenous level (**A**). KO2: *ATRAID*KO; *SLC37A3*KO. sATRAID: short isoform of ATRAID. lATRAID: long isoform of ATRAID.
