# Supplementary material for: Identification of a transporter complex responsible for the cytosolic entry of nitrogen-containing bisphosphonates
Source: eLife journal article supplement (doi:10.7554/elife.36620), 2018-05-10
Supplement: supp [file elife-36620-supp-v1.zip › elife_poa_e36620_Supplementary_File_1.xlsx]

## Sheet: 20150728_alendronate_addlreads_
	gamma	gamma	gamma	gamma	gamma	gamma	gamma	gamma	gamma	gamma	gamma	gamma	gamma	gamma	gamma	rho	rho	rho	rho	rho	rho	rho	rho	rho	rho	rho	rho	rho	rho	rho	tau	tau	tau	tau	tau	tau	tau	tau	tau	tau	tau	tau	tau	tau	tau
	RepA	RepA	RepA	RepA	RepA	RepB	RepB	RepB	RepB	RepB	ave_RepB_RepA	ave_RepB_RepA	ave_RepB_RepA	ave_RepB_RepA	ave_RepB_RepA	RepA	RepA	RepA	RepA	RepA	RepB	RepB	RepB	RepB	RepB	ave_RepB_RepA	ave_RepB_RepA	ave_RepB_RepA	ave_RepB_RepA	ave_RepB_RepA	RepA	RepA	RepA	RepA	RepA	RepB	RepB	RepB	RepB	RepB	ave_RepB_RepA	ave_RepB_RepA	ave_RepB_RepA	ave_RepB_RepA	ave_RepB_RepA
	transcripts	Mann-Whitney p-value	average phenotype of strongest 3	sgRNA count_MW	sgRNA count_avg	transcripts	Mann-Whitney p-value	average phenotype of strongest 3	sgRNA count_MW	sgRNA count_avg	transcripts	Mann-Whitney p-value	average phenotype of strongest 3	sgRNA count_MW	sgRNA count_avg	transcripts	Mann-Whitney p-value	average phenotype of strongest 3	sgRNA count_MW	sgRNA count_avg	transcripts	Mann-Whitney p-value	average phenotype of strongest 3	sgRNA count_MW	sgRNA count_avg	transcripts	Mann-Whitney p-value	average phenotype of strongest 3	sgRNA count_MW	sgRNA count_avg	transcripts	Mann-Whitney p-value	average phenotype of strongest 3	sgRNA count_MW	sgRNA count_avg	transcripts	Mann-Whitney p-value	average phenotype of strongest 3	sgRNA count_MW	sgRNA count_avg	transcripts	Mann-Whitney p-value	average phenotype of strongest 3	sgRNA count_MW	sgRNA count_avg
gene
A1BG	all	0.16283	0.00673052	10	10	all	0.968411	0.0115321	10	10	all	0.269969	0.00577035	10	10	all	0.249448	-0.0104121	10	10	all	0.128747	-0.0185801	10	10	all	0.113996	-0.0144961	10	10	all	0.60451	-0.00501325	10	10	all	0.224611	-0.0158396	10	10	all	0.256747	-0.00364125	10	10
A1CF	ENST00000373993.1	0.805202	0.00791015	10	10	ENST00000373993.1	0.31705	0.00400604	10	10	ENST00000374001.2,ENST00000373997.3,ENST00000282641.2	0.405807	0.00999837	10	10	ENST00000374001.2,ENST00000373997.3,ENST00000282641.2	0.380812	0.0327968	10	10	ENST00000373993.1	0.830317	-0.0404629	10	10	ENST00000373993.1	0.527223	-0.0456583	10	10	ENST00000374001.2,ENST00000373997.3,ENST00000282641.2	0.420238	0.0765877	10	10	ENST00000374001.2,ENST00000373997.3,ENST00000282641.2	0.419454	-0.0427389	10	10	ENST00000374001.2,ENST00000373997.3,ENST00000282641.2	0.378892	0.0156604	10	10
A2M	all	0.133907	-0.00489899	10	10	all	0.735325	-0.00769753	10	10	all	0.23889	-0.00931402	10	10	all	0.745755	-0.0396449	10	10	all	0.95123	0.0619866	10	10	all	0.73157	0.0354152	10	10	all	0.910365	-0.0273306	10	10	all	0.961811	0.0176135	10	10	all	0.944788	-0.0161397	10	10
A2ML1	all	0.888547	-0.00793988	10	10	all	0.421984	0.00649969	10	10	all	0.459481	0.00172913	10	10	all	0.0840919	-0.0557011	10	10	all	0.428192	-0.0968393	10	10	all	0.213599	-0.0559795	10	10	all	0.172218	-0.0640195	10	10	all	0.434437	-0.0202327	10	10	all	0.238983	-0.0425752	10	10
A4GALT	ENST00000249005.2,ENST00000381278.3	0.381524	0.00539114	10	10	ENST00000249005.2,ENST00000381278.3	0.214993	0.00598778	10	10	ENST00000249005.2,ENST00000381278.3	0.172922	0.0113332	10	10	ENST00000401850.1	0.177892	-0.0668677	10	10	ENST00000401850.1	0.405713	-0.0525902	10	10	ENST00000401850.1	0.190941	-0.0539047	10	10	ENST00000401850.1	0.277849	-0.0613463	10	10	ENST00000401850.1	0.234216	-0.04265	10	10	ENST00000401850.1	0.178229	-0.0513281	10	10
AAAS	all	0.919418	0.00541641	9	9	all	0.207352	-0.0203052	9	9	all	0.226801	-0.00611526	9	9	all	0.268358	-0.0288181	9	9	all	0.34356	-0.114396	9	9	all	0.17584	-0.101609	9	9	all	0.266186	-0.0230046	9	9	all	0.196558	-0.112624	9	9	all	0.12073	-0.0914416	9	9
AACS	all	0.0133145	-0.00282813	10	10	all	0.987875	-0.0210862	10	10	all	0.0736951	-0.0107445	10	10	all	0.951635	0.0125304	10	10	all	0.523163	-0.0230688	10	10	all	0.69502	0.00188366	10	10	all	0.998107	-0.0307015	10	10	all	0.981936	-0.0695014	10	10	all	0.961719	-0.0501015	10	10
AADAC	all	0.425755	-0.00688642	9	9	all	0.405876	-0.0236555	10	10	all	0.0690831	-0.0121018	9	9	all	0.823505	-0.00221041	9	9	all	0.833139	-0.00313095	10	10	all	0.856122	0.0104818	9	9	all	0.842356	-0.0470161	9	9	all	0.572094	-0.0197644	9	9	all	0.659214	0.00101671	9	9
AADACL2	all	0.232141	-0.0191968	10	10	all	0.161802	0.004464	10	10	all	0.968115	0.0021562	10	10	all	0.320426	0.0386038	10	10	all	0.445021	0.0256769	10	10	all	0.430759	0.0443371	10	10	all	0.848407	0.034919	10	10	all	0.136593	0.0188957	10	10	all	0.432077	0.0340828	10	10
AADAT	ENST00000337664.4,ENST00000509167.1,ENST00000353187.2	0.0901406	-0.0171155	9	9	ENST00000337664.4	0.306544	-0.00909728	1	1	ENST00000337664.4,ENST00000509167.1,ENST00000353187.2	0.14142	-0.011954	9	9	ENST00000337664.4	0.115911	0.117044	1	1	ENST00000337664.4	0.162549	0.0871992	1	1	ENST00000337664.4,ENST00000509167.1,ENST00000353187.2	0.108317	-0.0622263	9	9	ENST00000337664.4,ENST00000509167.1,ENST00000353187.2	0.108315	-0.0953793	9	9	ENST00000337664.4,ENST00000509167.1,ENST00000353187.2	0.149805	-0.134738	9	9	ENST00000337664.4,ENST00000509167.1,ENST00000353187.2	0.0770134	-0.108482	9	9
AAED1	all	0.953829	-0.00445639	10	10	all	0.760536	-0.00332422	10	10	all	0.807169	0.00232171	10	10	all	0.487017	-0.105655	10	10	all	0.33532	0.0521814	10	10	all	0.799707	0.000946622	10	10	all	0.356012	-0.0800904	10	10	all	0.286666	0.0823591	10	10	all	0.880154	0.00388804	10	10
AAGAB	all	0.392186	-0.0440525	10	10	all	0.000590528	-0.0302835	10	10	all	0.0121022	-0.0346177	10	10	all	0.577049	0.156615	10	10	all	0.104538	-0.0512029	10	10	all	0.216194	0.0481563	10	10	all	0.757035	-0.0113347	10	10	all	0.853825	-0.0632183	10	10	all	0.68643	-0.0410231	10	10
AAK1	all	0.502541	0.0249221	10	10	all	0.210719	0.0133778	10	10	all	0.287632	0.0154964	10	10	all	0.190762	0.104912	10	10	all	0.992333	-0.0128194	10	10	all	0.305612	0.0239819	10	10	all	0.0619731	0.101222	10	10	all	0.400526	0.0185021	10	10	all	0.066991	0.0548971	10	10
AAMDC	all	0.679833	-0.00496878	10	10	all	0.508238	0.00840748	10	10	all	0.892823	-0.003508	10	10	all	0.868229	-0.0306472	10	10	all	0.543744	0.0985036	10	10	all	0.640186	0.0300616	10	10	all	0.818388	-0.0221251	10	10	all	0.531902	0.0694064	10	10	all	0.581536	-0.00527894	10	10
AAMP	all	0.0042443	-0.0654207	10	10	all	0.0171133	-0.116631	10	10	all	0.00344775	-0.0905755	10	10	all	0.281561	-0.111646	9	9	all	0.684066	-0.00120098	8	8	all	0.454332	-0.0095361	8	8	all	0.0231785	-0.254196	10	10	all	0.0409395	-0.196654	10	10	all	0.0174088	-0.216756	10	10
AANAT	all	0.151629	0.0176477	10	10	all	0.677278	0.00380813	10	10	all	0.190135	0.012647	10	10	all	0.0778756	-0.0783712	10	10	all	0.717308	0.020349	10	10	all	0.201999	-0.0260515	10	10	all	0.234422	-0.0179185	10	10	all	0.864824	0.0464732	10	10	all	0.433204	-0.0074133	10	10
AAR2	all	0.0352837	-0.00766535	10	10	all	0.851713	-0.0101388	10	10	all	0.177275	-0.0182103	10	10	all	0.313972	-0.111568	10	10	all	0.0138014	-0.11935	10	10	all	0.0744771	-0.113323	10	10	all	0.20623	-0.125747	10	10	all	0.0187476	-0.107961	10	10	all	0.0745674	-0.113526	10	10
AARS	all	0.00990121	-0.155299	9	9	all	0.00155873	-0.20598	10	10	all	0.00981408	-0.172215	9	9	all	0.107307	0.137076	6	6	all	0.0886076	0.345443	7	7	all	0.574585	0.0949238	5	5	all	0.0654793	-0.180467	9	9	all	0.0381045	-0.138608	10	10	all	0.0262326	-0.199645	9	9
AARS2	all	4.15016e-06	-0.14802	10	10	all	3.96889e-06	-0.129392	10	10	all	1.63759e-06	-0.138706	10	10	all	3.01628e-05	0.349165	10	10	all	0.000389752	0.30662	10	10	all	0.000120464	0.327892	10	10	all	0.0713355	0.0246088	10	10	all	0.543152	-0.0575327	10	10	all	0.209075	0.0111609	10	10
AARSD1	all	0.323869	0.00566273	10	10	all	0.827646	0.00534107	10	10	all	0.517281	0.0103334	10	10	all	0.9524	0.0364676	10	10	all	0.799251	0.0332118	10	10	all	0.845587	0.0302236	10	10	all	0.92166	0.0847519	10	10	all	0.954478	0.0251506	10	10	all	0.912892	0.031522	10	10
AASDH	all	0.0865958	-0.0136354	10	10	all	0.446989	-0.00163751	10	10	all	0.493291	-0.00429916	10	10	all	0.641085	0.0296134	10	10	all	0.975153	0.0482071	10	10	all	0.707102	0.0313474	10	10	all	0.798564	-0.0148437	10	10	all	0.82593	0.0432062	10	10	all	0.862969	0.0263671	10	10
AASDHPPT	all	0.0460496	-0.11743	10	10	all	0.00900032	-0.128623	10	10	all	0.0122659	-0.123026	10	10	all	0.00351133	0.316004	10	10	all	0.183116	0.292735	10	10	all	0.0255602	0.298302	10	10	all	0.05615	0.0691311	10	10	all	0.363408	-0.0186433	10	10	all	0.656502	0.0345273	10	10
AASS	ENST00000393376.1	0.41975	0.0032692	10	10	ENST00000393376.1	0.0789804	-0.01305	10	10	ENST00000393376.1	0.631095	-0.00498774	10	10	ENST00000417368.2	0.345946	0.0217744	10	10	ENST00000393376.1	0.547087	-0.0861064	10	10	ENST00000393376.1	0.374807	-0.0878629	10	10	ENST00000417368.2	0.327316	0.0146242	10	10	ENST00000393376.1	0.227382	-0.0760382	10	10	ENST00000393376.1	0.321479	-0.0738901	10	10
AATF	all	0.00487926	-0.0978846	10	10	all	0.00713067	-0.119431	10	10	all	0.00909882	-0.108658	10	10	all	0.367713	0.0841696	10	10	all	0.264655	0.0378701	10	10	all	0.300828	0.0900134	10	10	all	0.00856219	-0.128765	10	10	all	0.00343241	-0.156334	10	10	all	0.00294226	-0.142549	10	10
AATK	all	0.912515	0.00885848	10	10	all	0.885724	0.00533407	10	10	all	0.919163	0.0041894	10	10	all	0.399959	-0.0592402	10	10	all	0.300687	-0.0277284	10	10	all	0.264984	-0.0483322	10	10	all	0.459898	-0.0233568	10	10	all	0.465036	-0.0125236	10	10	all	0.393642	-0.0137777	10	10
ABAT	ENST00000396600.2	0.363498	-0.0143074	9	9	ENST00000268251.8	0.257256	0.00566639	10	10	ENST00000425191.2	0.443206	0.0027899	6	6	ENST00000425191.2	0.130065	-0.0510016	6	6	ENST00000268251.8	0.254762	-0.0645306	10	10	ENST00000268251.8	0.602775	0.0164708	10	10	ENST00000425191.2	0.193854	-0.0338208	6	6	ENST00000396600.2	0.26554	0.106208	9	9	ENST00000396600.2	0.584818	0.0487813	9	9
ABCA1	all	0.868546	0.018789	10	10	all	0.540773	-0.0128123	10	10	all	0.867313	-0.00679161	10	10	all	0.273891	-0.0365325	10	10	all	0.762632	-0.0284909	10	10	all	0.452385	-0.0327432	10	10	all	0.435377	-0.0536827	10	10	all	0.373722	-0.0248234	10	10	all	0.289531	-0.042931	10	10
ABCA12	all	0.262394	0.00423419	10	10	all	0.282402	-0.0202343	10	10	all	0.696657	0.00175916	10	10	all	0.042476	0.115832	10	10	all	0.756779	-0.021283	10	10	all	0.225325	0.0499962	10	10	all	0.0141208	0.102432	10	10	all	0.940138	-0.0256082	10	10	all	0.202872	0.0332884	10	10
ABCA13	all	0.373919	0.00916916	10	10	all	0.612458	-0.00439027	10	10	all	0.376641	0.00515894	10	10	all	0.13345	-0.0249605	10	10	all	0.558926	-0.0136746	10	10	all	0.25954	-0.0548379	10	10	all	0.271495	-0.0181993	10	10	all	0.664018	-0.00966029	10	10	all	0.39647	-0.0151666	10	10
ABCA2	all	0.274535	-0.0225279	10	10	all	0.420516	0.00444134	10	10	all	0.934077	-0.00881129	10	10	all	0.425725	0.0596712	10	10	all	0.864761	0.0198016	10	10	all	0.775842	0.0464619	10	10	all	0.746959	0.0344879	10	10	all	0.998153	-0.0131062	10	10	all	0.935612	0.0312851	10	10
ABCA3	all	0.157453	-0.0488832	10	10	all	0.9667	-0.0846883	10	10	all	0.194376	-0.0722183	10	10	all	0.457792	0.234639	10	10	all	0.0681223	0.244971	10	10	all	0.15499	0.230471	10	10	all	0.105601	0.0966022	10	10	all	0.167772	0.0722048	10	10	all	0.066353	0.0365823	10	10
ABCA4	all	0.382847	-0.00892848	10	10	all	0.987966	0.0097673	10	10	all	0.674464	8.1238e-05	10	10	all	0.36078	0.0991156	10	10	all	0.908419	0.0470607	10	10	all	0.410452	0.0461098	10	10	all	0.392561	0.0393183	10	10	all	0.668451	0.0610304	10	10	all	0.373828	0.0313136	10	10
ABCA5	ENST00000392676.3,ENST00000392677.2	0.0590475	-0.0281386	10	10	ENST00000588877.1	0.0134085	0.0157206	10	10	ENST00000588877.1	0.0422609	0.0151306	10	10	ENST00000392676.3,ENST00000392677.2	0.113204	0.150132	10	10	ENST00000588877.1	0.454103	0.00171088	10	10	ENST00000392676.3,ENST00000392677.2	0.280321	0.100566	10	10	ENST00000588877.1	0.457774	0.00416837	10	10	ENST00000588877.1	0.0794828	0.060728	10	10	ENST00000588877.1	0.43062	0.0257198	10	10
ABCA6	all	0.750427	-0.00834321	10	10	all	0.119634	-0.00707365	10	10	all	0.103156	-0.00455644	10	10	all	0.873437	0.00183202	10	10	all	0.725859	0.0271479	10	10	all	0.712242	-0.00115558	10	10	all	0.714888	-0.0134467	10	10	all	0.286181	-0.0156323	10	10	all	0.358774	-0.00502144	10	10
ABCA7	all	0.742215	-0.0078401	10	10	all	0.0161826	-0.0243595	10	10	all	0.218525	-0.0113945	10	10	all	0.664276	-0.0243324	10	10	all	0.600508	0.0650935	10	10	all	0.881626	-0.00583933	10	10	all	0.61305	-0.0213628	10	10	all	0.944946	0.0222935	10	10	all	0.683854	-0.0177019	10	10
ABCA8	ENST00000586539.1	0.103789	0.0145852	6	6	ENST00000430352.2	0.064035	0.0255263	10	10	ENST00000430352.2	0.269233	0.014061	10	10	ENST00000430352.2	0.800823	-0.0309659	10	10	ENST00000430352.2	0.319024	0.0446893	10	10	ENST00000430352.2	0.704663	0.0866625	10	10	ENST00000586539.1	0.353785	0.0185495	6	6	ENST00000430352.2	0.0250716	0.0881781	9	9	ENST00000430352.2	0.202703	0.0732584	9	9
ABCA9	all	0.0503632	-0.0176655	10	10	all	0.255174	0.0038075	10	10	all	0.59013	-0.00668599	10	10	all	0.700985	0.0514059	10	10	all	0.390845	-0.0307457	10	10	all	0.772202	-0.00828024	10	10	all	0.715985	-0.00163127	10	10	all	0.655105	-0.0229613	10	10	all	0.486936	-0.00230653	10	10
ABCB1	all	0.857943	-0.00341259	9	9	all	0.303625	0.0158902	9	9	all	0.476731	0.00311033	9	9	all	0.48078	-0.0739245	9	9	all	0.881624	-0.0560873	9	9	all	0.722374	-0.0889894	9	9	all	0.43051	-0.0672147	9	9	all	0.939081	0.00641804	9	9	all	0.750669	-0.0342404	9	9
ABCB10	all	0.00510512	-0.0946483	10	10	all	0.0258049	-0.0857532	10	10	all	0.00244839	-0.0886706	10	10	all	0.850222	0.0126915	9	9	all	0.970957	0.0295608	9	9	all	0.90847	0.0185244	9	9	all	0.118895	-0.213599	10	10	all	0.258095	-0.29647	10	10	all	0.178631	-0.255034	10	10
ABCB11	all	0.57428	-0.00894556	10	10	all	0.865777	-0.00140808	10	10	all	0.600787	-0.00433689	10	10	all	0.582776	0.0287228	10	10	all	0.352904	0.0355531	10	10	all	0.271344	0.0187402	10	10	all	0.79586	-0.0105121	10	10	all	0.55433	0.08794	10	10	all	0.647945	0.0347403	10	10
ABCB4	ENST00000359206.3	0.0967286	0.0262201	1	1	ENST00000359206.3	0.0883495	0.0328694	1	1	ENST00000359206.3	0.0854529	0.0295447	1	1	ENST00000545634.1	0.858767	0.00726027	1	1	ENST00000359206.3	0.377857	-0.0411754	1	1	all	0.289571	0.071136	9	9	ENST00000359206.3	0.249558	0.0490526	1	1	ENST00000359206.3	0.477324	0.0267524	1	1	ENST00000359206.3	0.28385	0.0379025	1	1
ABCB6	all	0.398215	-0.0139012	10	10	all	0.348389	0.00487883	10	10	all	0.847604	-0.00224897	10	10	all	0.840071	0.0509501	10	10	all	0.31332	0.127226	10	10	all	0.562632	0.0958686	10	10	all	0.681572	0.00480643	10	10	all	0.157508	0.0999409	10	10	all	0.531394	0.0429976	10	10
ABCB7	all	5.66588e-05	-0.1461	10	10	all	1.31031e-06	-0.114074	10	10	all	8.71355e-06	-0.128122	10	10	all	0.0102258	0.120887	10	10	all	0.293537	0.118261	10	10	all	0.0330557	0.0967006	10	10	all	0.00014478	-0.19039	10	10	all	0.000152618	-0.153565	10	10	all	7.97042e-05	-0.161939	10	10
ABCB8	all	0.618852	0.0119107	10	10	all	0.831654	-0.0143232	10	10	all	0.936865	-0.00160601	10	10	all	0.946549	0.0151381	10	10	all	0.194857	0.0410891	10	10	all	0.436942	0.0265195	10	10	all	0.704082	-0.0112491	10	10	all	0.325844	0.037768	10	10	all	0.483966	0.0361999	10	10
ABCB9	ENST00000542678.1	0.573374	0.00762568	6	6	ENST00000280560.8	0.279052	-0.00480084	10	10	ENST00000280560.8	0.59091	-0.00366739	10	10	ENST00000392439.3	0.0717695	-0.0899531	9	9	ENST00000542678.1	0.0302589	0.131823	6	6	ENST00000392439.3	0.0218483	-0.0765924	9	9	ENST00000392439.3	0.0212805	-0.0758232	9	9	ENST00000542678.1	0.0137441	0.0905342	6	6	ENST00000392439.3	0.0674783	-0.0919713	9	9
ABCC1	all	0.595946	0.0009926	10	10	all	0.357495	0.00552944	10	10	all	0.132204	-0.00303568	10	10	all	0.692374	-0.0234389	10	10	all	0.649849	0.0174369	10	10	all	0.715451	-0.0302468	10	10	all	0.93315	0.0206958	10	10	all	0.761043	-0.000758092	10	10	all	0.977585	0.00996888	10	10
ABCC10	all	0.956664	-0.0145977	10	10	all	0.49894	0.00769344	10	10	all	0.786484	0.00379005	10	10	all	0.99779	-0.0182399	10	10	all	0.758241	0.00655375	10	10	all	0.834702	-0.013763	10	10	all	0.861971	0.0202938	10	10	all	0.994188	0.0180457	10	10	all	0.848151	0.0232239	10	10
ABCC12	all	0.268936	0.0124397	9	9	all	0.280211	0.0193198	9	9	all	0.0964728	0.00954758	9	9	all	0.834002	-0.0434787	9	9	all	0.982695	0.0514838	9	9	all	0.973395	-0.0202296	9	9	all	0.652422	0.0359992	9	9	all	0.953628	0.121737	9	9	all	0.65861	0.0829081	9	9
ABCC2	all	0.140659	-0.00865054	10	10	all	0.68731	0.0107682	10	10	all	0.972983	-0.00243887	10	10	all	0.969113	0.0310021	10	10	all	0.455979	0.131804	10	10	all	0.775581	0.106773	10	10	all	0.402931	0.0321865	10	10	all	0.513903	0.116024	10	10	all	0.949109	0.0935114	10	10
ABCC3	all	0.198412	0.0100548	10	10	all	0.203439	0.0150409	10	10	all	0.0838658	0.0105022	10	10	all	0.953526	0.0287442	10	10	all	0.0495379	0.0924249	10	10	all	0.201639	0.0636132	10	10	all	0.751284	0.0699501	10	10	all	0.00757278	0.0749388	10	10	all	0.0604924	0.059664	10	10
ABCC4	all	0.775101	0.00240209	10	10	all	0.0914231	0.0144885	10	10	all	0.22116	0.0108586	10	10	all	0.127966	0.0660366	10	10	all	0.99355	-0.0113794	10	10	all	0.371465	0.0249436	10	10	all	0.109778	0.0569902	10	10	all	0.447493	0.0429598	10	10	all	0.169886	0.0470195	10	10
ABCC5	all	0.800877	0.00913054	10	10	all	0.45217	-0.0171539	10	10	all	0.713622	-0.00480719	10	10	all	0.0809747	-0.127867	10	10	all	0.643677	-0.0285708	10	10	all	0.215648	-0.0953217	10	10	all	0.0478722	-0.0851193	10	10	all	0.391788	-0.0577399	10	10	all	0.0818127	-0.0639072	10	10
ABCC6	all	0.576476	-0.00118207	10	10	all	0.175823	0.0127147	10	10	all	0.651818	0.00658346	10	10	all	0.684633	-0.0104174	10	10	all	0.372846	-0.0429769	10	10	all	0.620958	-0.0306361	10	10	all	0.934632	-0.0255221	10	10	all	0.793373	0.000626875	10	10	all	0.772972	-0.0227841	10	10
ABCC8	all	0.4513	0.0039728	10	10	all	0.300432	0.0132353	10	10	all	0.918266	0.00475791	10	10	all	0.712752	-0.0449307	10	10	all	0.976009	0.0197348	10	10	all	0.761139	-0.0281337	10	10	all	0.735734	-0.0445285	10	10	all	0.43743	0.0143012	10	10	all	0.854267	-0.0527579	10	10
ABCC9	all	0.491626	0.00776998	10	10	all	0.752674	-0.00370004	10	10	all	0.724617	0.00780666	10	10	all	0.357345	-0.0979528	10	10	all	0.571119	-0.0925699	10	10	all	0.410967	-0.105851	10	10	all	0.350971	-0.0604396	10	10	all	0.504447	-0.0588287	10	10	all	0.379443	-0.0729721	10	10
ABCD1	all	0.27665	0.00869169	10	10	all	0.967195	0.00207309	10	10	all	0.231487	-0.000782877	10	10	all	0.0513213	-0.102058	10	10	all	0.563918	-0.0183625	10	10	all	0.186223	-0.0875215	10	10	all	0.0951825	-0.0691793	10	10	all	0.458302	0.0275509	10	10	all	0.254713	-0.029491	10	10
ABCD2	all	0.561074	0.00689533	10	10	all	0.873426	-0.00937791	10	10	all	0.829224	-0.000637175	10	10	all	0.44982	-0.00683229	10	10	all	0.831463	0.0454542	10	10	all	0.615614	0.0379361	10	10	all	0.54486	-3.23295e-05	10	10	all	0.878876	-0.00897727	10	10	all	0.570733	0.00499086	10	10
ABCD3	all	0.591957	-0.00246494	10	10	all	0.433105	0.00886936	10	10	all	0.52632	0.00292921	10	10	all	0.290896	0.0349417	10	10	all	0.181135	0.0246501	10	10	all	0.182853	0.0599531	10	10	all	0.403313	0.0299683	10	10	all	0.191381	0.0421799	10	10	all	0.209034	0.0425425	10	10
ABCD4	all	0.587437	-0.0242615	10	10	all	0.0172504	-0.0236837	10	10	all	0.0753877	-0.020147	10	10	all	0.258316	-0.0493257	10	10	all	0.635714	-0.026975	10	10	all	0.327708	-0.0569356	10	10	all	0.111038	-0.0762813	10	10	all	0.127988	-0.0705861	10	10	all	0.0764074	-0.0684076	10	10
ABCE1	all	0.0277279	-0.0946442	10	10	all	0.0160282	-0.0532277	10	10	all	0.00483971	-0.073703	10	10	all	0.077834	0.0900217	9	9	all	0.928339	-0.0524997	10	10	all	0.183581	0.0656674	9	9	all	0.973008	-0.125045	10	10	all	0.289896	-0.114788	10	10	all	0.606896	-0.120172	10	10
ABCF1	all	0.0927242	-0.0351433	9	9	all	0.822918	-0.0272153	9	9	all	0.167314	-0.0357046	9	9	all	0.771776	0.00309881	8	8	all	0.00719839	-0.127309	8	8	all	0.0285271	-0.0685281	8	8	all	0.0460101	-0.0470193	9	9	all	0.000978589	-0.176707	9	9	all	0.00361298	-0.137929	9	9
ABCF2	all	0.279327	-0.0154335	10	10	all	0.328131	0.00816424	10	10	all	0.733539	-0.00470048	10	10	all	0.251967	0.0213764	10	10	all	0.583164	-0.0270568	10	10	all	0.906511	-0.0280815	10	10	all	0.616306	-0.03739	10	10	all	0.950161	-0.0160885	10	10	all	0.924828	-0.0238477	10	10
ABCF3	all	0.0766128	0.0144615	10	10	all	0.609844	-0.000780235	10	10	all	0.317909	0.00925998	10	10	all	0.270928	-0.00336287	10	10	all	0.221896	-0.0365058	10	10	all	0.170528	-0.0131815	10	10	all	0.83533	-0.0064972	10	10	all	0.254477	-0.0336304	10	10	all	0.348157	-0.0127998	10	10
ABCG1	all	0.626879	-0.0173925	10	10	all	0.554996	-0.0197458	10	10	all	0.667375	-0.0196875	10	10	all	0.739815	0.0454664	10	10	all	0.805195	0.0205054	10	10	all	0.985144	0.0329859	10	10	all	0.889082	0.0195534	10	10	all	0.43723	-0.0272961	10	10	all	0.744147	-0.0288975	10	10
ABCG2	all	0.949286	-0.00962873	10	10	all	0.482765	-0.00419829	10	10	all	0.561053	-0.00134338	10	10	all	0.811852	-0.0594184	10	10	all	0.686544	0.0667619	10	10	all	0.71765	-0.0291857	10	10	all	0.921032	-0.058691	10	10	all	0.900516	0.00907463	10	10	all	0.890332	-0.0268644	10	10
ABCG4	all	0.247566	-0.030504	10	10	all	0.0395557	-0.036504	10	10	all	0.0309686	-0.0340854	10	10	all	0.250752	-0.0234169	10	10	all	0.303202	-0.0151081	10	10	all	0.169788	-0.00137956	10	10	all	0.295656	-0.0760331	10	10	all	0.662256	-0.0562168	10	10	all	0.372312	-0.0513668	10	10
ABHD1	all	0.771426	0.010437	10	10	all	0.449558	0.00671256	10	10	all	0.472206	0.00535099	10	10	all	0.438612	-0.0283221	10	10	all	0.85211	0.00894469	10	10	all	0.822615	-0.0174952	10	10	all	0.43196	-0.0206732	10	10	all	0.839411	0.0622525	10	10	all	0.785462	0.0362457	10	10
ABHD10	all	0.593246	0.00848072	10	10	all	0.52342	-0.00673428	10	10	all	0.816378	-0.00349418	10	10	all	0.167759	-0.0521709	10	10	all	0.863072	0.0333623	10	10	all	0.292654	-0.0326412	10	10	all	0.294016	-0.0480934	10	10	all	0.728701	-0.0208803	10	10	all	0.274313	-0.0217944	10	10
ABHD11	all	0.0467191	0.00755947	10	10	all	0.392481	-0.00817947	10	10	all	0.367494	-0.00505992	10	10	all	0.326075	-0.02258	10	10	all	0.388664	-0.0715001	10	10	all	0.17661	-0.0602011	10	10	all	0.980306	0.0172345	10	10	all	0.286896	-0.0991785	10	10	all	0.420311	-0.0317668	10	10
ABHD12	all	0.643268	-0.0216026	10	10	all	0.418109	-0.00626113	10	10	all	0.239025	-0.0063862	10	10	all	0.370697	-0.00835977	10	10	all	0.869831	0.0540794	10	10	all	0.497568	0.067176	10	10	all	0.183898	-0.00356757	10	10	all	0.768711	-0.00453548	10	10	all	0.378524	0.0415341	10	10
ABHD13	all	0.000303007	-0.0359387	10	10	all	0.000253632	-0.0382466	10	10	all	3.31615e-05	-0.036077	10	10	all	0.558166	-0.0303905	10	10	all	0.251756	-0.0311577	10	10	all	0.28022	-0.0222043	10	10	all	0.00573841	-0.0774846	10	10	all	0.001355	-0.0919454	10	10	all	0.000811112	-0.0724685	10	10
ABHD14A	all	0.172769	0.00544622	10	10	all	0.45302	0.00877216	10	10	all	0.0590701	0.00261113	10	10	all	0.0838993	-0.0250561	10	10	all	0.595053	-0.011347	10	10	all	0.131052	-0.0066386	10	10	all	0.231457	-0.0144936	10	10	all	0.866911	0.010753	10	10	all	0.4443	-0.0123476	10	10
ABHD14B	ENST00000483233.1	0.0472905	-0.0252542	9	9	ENST00000395008.2,ENST00000361143.5,ENST00000525795.1	0.368401	-0.0166875	10	10	ENST00000395008.2,ENST00000361143.5,ENST00000525795.1	0.107162	-0.00954978	10	10	ENST00000395008.2,ENST00000361143.5,ENST00000525795.1	0.0909413	-0.112187	10	10	ENST00000395008.2,ENST00000361143.5,ENST00000525795.1	0.245819	-0.128806	10	10	ENST00000395008.2,ENST00000361143.5,ENST00000525795.1	0.120239	-0.0896999	10	10	ENST00000395008.2,ENST00000361143.5,ENST00000525795.1	0.0373284	-0.113774	10	10	ENST00000395008.2,ENST00000361143.5,ENST00000525795.1	0.190844	-0.126569	10	10	ENST00000395008.2,ENST00000361143.5,ENST00000525795.1	0.0703093	-0.0986855	10	10
ABHD15	all	0.236384	0.0106967	10	10	all	0.566987	-0.00845565	10	10	all	0.586078	-0.00385808	10	10	all	0.449854	-0.040261	10	10	all	0.21951	-0.081515	10	10	all	0.270162	-0.0648051	10	10	all	0.791287	-0.0346089	10	10	all	0.252622	-0.0953493	10	10	all	0.360553	-0.0622215	10	10
ABHD17A	all	0.924621	-0.0189233	10	10	all	0.0557041	-0.0257636	10	10	all	0.448642	-0.0264307	10	10	all	0.165369	0.0155648	10	10	all	0.923893	0.0657914	10	10	all	0.380006	0.0331608	10	10	all	0.407393	0.00767014	10	10	all	0.44164	-0.0231631	10	10	all	0.983627	-0.00314408	10	10
ABHD17B	all	0.714972	-0.00503683	10	10	all	0.406578	-0.0121439	10	10	all	0.445803	-0.0107332	10	10	all	0.0273535	0.0863389	10	10	all	0.120712	0.106511	10	10	all	0.0184006	0.0861238	10	10	all	0.0305683	0.0736117	10	10	all	0.23535	0.0543836	10	10	all	0.0554842	0.0722833	10	10
ABHD17C	all	0.481578	0.0066905	10	10	all	0.306645	-0.0125746	10	10	all	0.761723	-0.00111183	10	10	all	0.420718	0.0122784	10	10	all	0.445695	0.0818568	10	10	all	0.37682	0.0260039	10	10	all	0.26302	0.0200433	10	10	all	0.737159	0.0608804	10	10	all	0.459047	0.0253784	10	10
ABHD2	ENST00000352732.5	0.37274	0.00441497	4	4	ENST00000355100.3	0.202697	-0.00602292	10	10	ENST00000352732.5	0.316174	0.00540304	4	4	ENST00000352732.5,ENST00000565973.1	0.0911443	0.0775862	6	6	ENST00000352732.5,ENST00000565973.1	0.471981	0.042679	6	6	ENST00000352732.5,ENST00000565973.1	0.169481	0.0650171	6	6	ENST00000565973.1	0.225821	0.0232157	4	4	ENST00000352732.5,ENST00000565973.1	0.344822	0.0452948	6	6	ENST00000352732.5,ENST00000565973.1	0.286949	0.0417341	6	6
ABHD3	all	0.010538	-0.0357706	10	10	all	0.653389	-0.0481099	10	10	all	0.0441186	-0.039207	10	10	all	0.193575	-0.074606	10	10	all	0.93409	-0.00670948	10	10	all	0.487009	-0.0674455	10	10	all	0.0428221	-0.176759	10	10	all	0.873891	-0.0496483	10	10	all	0.24817	-0.110563	10	10
ABHD4	all	0.293808	0.0116704	10	10	all	0.759117	-0.0160556	10	10	all	0.496006	-0.0072082	10	10	all	0.578981	-0.00303515	10	10	all	0.679531	-0.0556325	10	10	all	0.534943	0.00724138	10	10	all	0.655706	0.0335774	10	10	all	0.808604	0.0259945	10	10	all	0.680785	0.0154834	10	10
ABHD5	all	0.637127	0.00401156	10	10	all	0.150061	-0.0200881	10	10	all	0.596702	-0.00827667	10	10	all	0.0679346	-0.0961447	10	10	all	0.0836364	-0.164494	10	10	all	0.0458327	-0.146161	10	10	all	0.196703	-0.126442	10	10	all	0.0155125	-0.144152	10	10	all	0.0318051	-0.126759	10	10
ABHD6	all	0.457945	-0.0360549	10	10	all	0.09633	-0.0196506	10	10	all	0.0745007	-0.0241718	10	10	all	0.488896	0.0265646	10	10	all	0.962624	0.0100478	10	10	all	0.751241	0.0202807	10	10	all	0.9389	-0.00724122	10	10	all	0.582003	-0.0229822	10	10	all	0.512362	-0.0263649	10	10
ABHD8	all	0.20856	0.0109128	9	9	all	0.873079	0.00699321	8	8	all	0.21991	0.00266208	8	8	all	0.197394	0.0501916	9	9	all	0.773446	-0.0122001	9	9	all	0.405146	0.0421334	9	9	all	0.437437	0.0684711	9	9	all	0.591929	-0.0808379	9	9	all	0.465371	0.0153545	9	9
ABI1	ENST00000376170.4,ENST00000376142.2,ENST00000359188.4,ENST00000376138.3,ENST00000355394.4,ENST00000346832.5,ENST00000376134.3,ENST00000376137.4,ENST00000536334.1	0.407075	0.00543468	3	3	all	0.0876285	-0.0141376	6	6	ENST00000376170.4,ENST00000376142.2,ENST00000359188.4,ENST00000376140.3	0.271218	-0.00727722	1	1	ENST00000376170.4,ENST00000376142.2,ENST00000359188.4,ENST00000376138.3,ENST00000355394.4,ENST00000346832.5,ENST00000376134.3,ENST00000376137.4,ENST00000536334.1	0.0102551	0.102355	3	3	ENST00000376170.4,ENST00000376142.2,ENST00000359188.4,ENST00000376138.3,ENST00000355394.4,ENST00000346832.5,ENST00000376134.3,ENST00000376137.4,ENST00000536334.1	0.00517899	0.135216	3	3	ENST00000376170.4,ENST00000376142.2,ENST00000359188.4,ENST00000376138.3,ENST00000355394.4,ENST00000346832.5,ENST00000376134.3,ENST00000376137.4,ENST00000536334.1	0.00508446	0.118786	3	3	ENST00000376170.4,ENST00000376142.2,ENST00000359188.4,ENST00000376138.3,ENST00000355394.4,ENST00000346832.5,ENST00000376134.3,ENST00000376137.4,ENST00000536334.1	0.00636102	0.0964627	3	3	ENST00000376170.4,ENST00000376142.2,ENST00000359188.4,ENST00000376138.3,ENST00000355394.4,ENST00000346832.5,ENST00000376134.3,ENST00000376137.4,ENST00000536334.1	0.00430779	0.11649	3	3	ENST00000376170.4,ENST00000376142.2,ENST00000359188.4,ENST00000376138.3,ENST00000355394.4,ENST00000346832.5,ENST00000376134.3,ENST00000376137.4,ENST00000536334.1	0.00394664	0.106476	3	3
ABI2	ENST00000295851.5	0.183841	0.00876782	6	6	ENST00000422511.2	0.100147	-0.00840159	6	6	all	0.459853	8.4443e-05	4	4	ENST00000422511.2	0.33031	-0.0340073	6	6	ENST00000295851.5	0.247276	0.124853	6	6	ENST00000295851.5	0.648104	0.0389019	6	6	ENST00000422511.2	0.360679	-0.0172795	6	6	ENST00000295851.5	0.430399	0.0469788	6	6	ENST00000422511.2	0.516976	-0.00188443	6	6
ABL1	all	0.880959	-0.00978473	8	8	all	0.471733	-0.00014347	8	8	all	0.762461	-0.00637079	8	8	all	0.794987	-0.0219141	8	8	all	0.0770606	-0.0833649	8	8	all	0.153251	-0.0478193	8	8	all	0.656527	-0.0212798	8	8	all	0.0523189	-0.147655	8	8	all	0.135101	-0.0423059	8	8
ABL2	ENST00000504405.1	0.16784	-0.0426617	10	10	ENST00000504405.1	0.039942	-0.0201441	10	10	ENST00000504405.1	0.0235535	-0.0295719	10	10	ENST00000504405.1	0.103803	0.171068	10	10	ENST00000504405.1	0.175213	0.128606	10	10	ENST00000504405.1	0.082541	0.134063	10	10	ENST00000504405.1	0.187087	0.0788844	10	10	ENST00000504405.1	0.474926	0.0432038	10	10	ENST00000502732.1,ENST00000367623.4,ENST00000507173.1,ENST00000511413.1	0.194111	-0.0136319	10	10
ABLIM1	all	0.150055	-0.018438	10	10	all	0.095901	0.010064	10	10	all	0.790314	-0.00151053	10	10	all	0.0242511	0.114714	10	10	all	0.362506	0.0704382	10	10	all	0.0518053	0.0859869	10	10	all	0.0968745	0.0889996	10	10	all	0.137817	0.0706651	10	10	all	0.071439	0.0753789	10	10
ABLIM2	all	0.819971	-0.000838799	9	9	all	0.664324	0.00247686	9	9	all	0.579506	0.00437435	9	9	all	0.178636	0.0435764	9	9	all	0.10515	0.0801955	9	9	all	0.0589449	0.0267684	9	9	all	0.16398	0.0522995	9	9	all	0.105404	0.0710127	9	9	all	0.0589048	0.0736162	9	9
ABLIM3	all	0.032314	-0.0585528	10	10	all	0.0367402	-0.0756255	10	10	all	0.0365293	-0.063617	10	10	all	0.460879	-0.0876504	10	10	all	0.997474	-0.073309	10	10	all	0.618722	-0.0718325	10	10	all	0.0743291	-0.152662	10	10	all	0.602612	-0.236117	10	10	all	0.219123	-0.173689	10	10
ABO	all	0.590475	-0.00612157	10	10	all	0.738605	0.00447142	10	10	all	0.873456	-0.00330432	10	10	all	0.752998	-0.0237286	10	10	all	0.111148	0.0696346	10	10	all	0.466951	0.0751333	10	10	all	0.634548	0.0170723	10	10	all	0.0801628	0.0850405	10	10	all	0.528062	0.026371	10	10
ABR	all	0.431662	0.000381854	10	10	all	0.751259	0.00738565	10	10	all	0.325029	0.00441617	10	10	all	0.00205232	-0.134346	10	10	all	0.0219961	-0.140469	10	10	all	0.00145592	-0.113358	10	10	all	0.00356599	-0.0969833	10	10	all	0.0853426	-0.0544153	10	10	all	0.0137395	-0.0971559	10	10
ABRA	all	0.809402	-0.00134397	10	10	all	0.817843	0.01535	10	10	all	0.616535	0.00399084	10	10	all	0.196791	0.0623215	10	10	all	0.722892	0.0284766	10	10	all	0.302683	0.0249838	10	10	all	0.190336	0.0624157	10	10	all	0.498731	0.0249211	10	10	all	0.26359	0.048986	10	10
ABRACL	all	0.302067	-0.00324874	10	10	all	0.844853	-0.00863904	10	10	all	0.3753	-0.00562981	10	10	all	0.485849	0.0227288	10	10	all	0.969834	-0.0152029	10	10	all	0.570065	-0.00387569	10	10	all	0.338997	-0.025972	10	10	all	0.706925	0.0360057	10	10	all	0.322197	0.0313321	10	10
ABT1	all	0.785852	-0.00741232	10	10	all	0.637616	-0.00169108	10	10	all	0.900786	-0.00466311	10	10	all	0.576432	0.0132196	10	10	all	0.448499	-0.0171002	10	10	all	0.433811	0.000501948	10	10	all	0.478102	0.0301299	10	10	all	0.603005	0.00703071	10	10	all	0.504677	-0.00398753	10	10
ABTB1	all	0.375074	-0.0359973	10	10	all	0.417297	-0.0269994	10	10	all	0.226195	-0.0266366	10	10	all	0.159991	0.0615916	10	10	all	0.384509	-0.0477928	10	10	all	0.993091	0.0234268	10	10	all	0.627881	-0.0146798	10	10	all	0.273445	-0.0692461	10	10	all	0.702633	-0.0300173	10	10
ABTB2	all	0.367849	-0.0119116	10	10	all	0.155149	-0.0207529	10	10	all	0.789617	-0.015291	10	10	all	0.0104124	-0.106428	10	10	all	0.651314	-0.0415347	10	10	all	0.0845413	-0.0901148	10	10	all	0.0407839	-0.128189	10	10	all	0.255868	-0.0735806	10	10	all	0.0752137	-0.100885	10	10
ACAA1	all	0.712529	0.00334834	10	10	all	0.546133	0.00519114	10	10	all	0.733454	0.00359189	10	10	all	0.157551	0.0846546	10	10	all	0.334895	0.0442283	10	10	all	0.226062	0.0741402	10	10	all	0.163086	0.0809895	10	10	all	0.345511	0.0246793	10	10	all	0.242976	0.0588545	10	10
ACAA2	all	0.276101	-0.00419921	10	10	all	0.542457	-0.00642194	10	10	all	0.508033	-0.00897246	10	10	all	0.543444	-0.0324145	10	10	all	0.158918	-0.140196	10	10	all	0.22334	-0.10134	10	10	all	0.519756	-0.08708	10	10	all	0.122769	-0.116577	10	10	all	0.152293	-0.0896384	10	10
ACACA	all	0.0113063	-0.0505894	10	10	all	0.000958682	-0.0533393	10	10	all	0.00112129	-0.0519643	10	10	all	0.000241011	-0.212219	10	10	all	0.00287863	-0.247274	10	10	all	0.000677254	-0.217136	10	10	all	0.000212512	-0.25064	10	10	all	0.000868516	-0.294278	10	10	all	0.00047376	-0.272459	10	10
ACACB	ENST00000338432.7	0.196038	-0.00689344	10	10	ENST00000377848.3	0.678353	-0.00714677	10	10	ENST00000377848.3	0.345268	0.00466291	10	10	ENST00000377848.3	0.240139	0.00607975	10	10	ENST00000338432.7	0.578363	-0.0262181	10	10	ENST00000338432.7	0.551913	-0.0318665	10	10	ENST00000338432.7	0.48921	0.0221015	10	10	ENST00000338432.7	0.407427	-0.0386668	10	10	ENST00000338432.7	0.965053	-0.0150365	10	10
ACAD10	all	0.119807	0.0156263	10	10	all	0.363668	-0.0175855	10	10	all	0.84539	-0.00625787	10	10	all	0.999549	0.0332676	10	10	all	0.022392	0.0576066	10	10	all	0.0847456	0.0273521	10	10	all	0.508427	0.071793	10	10	all	0.0545829	0.02336	10	10	all	0.111199	0.0495158	10	10
ACAD11	all	0.152114	-0.0273124	10	10	all	0.181294	-0.0331093	10	10	all	0.17713	-0.0294523	10	10	all	0.0397646	-0.123391	10	10	all	0.141931	-0.151093	10	10	all	0.0485677	-0.134636	10	10	all	0.0232505	-0.130427	10	10	all	0.0461332	-0.138836	10	10	all	0.0191573	-0.128176	10	10
ACAD8	all	0.173785	-0.0117329	10	10	all	0.344685	0.0025894	10	10	all	0.115829	-0.00785756	10	10	all	0.761081	0.135114	10	10	all	0.512478	0.0792911	10	10	all	0.55669	0.101394	10	10	all	0.681116	0.0689923	10	10	all	0.665002	0.057072	10	10	all	0.900169	0.0728165	10	10
ACAD9	all	0.0150472	-0.0369241	10	10	all	0.890991	-0.0329693	10	10	all	0.0495827	-0.0285708	10	10	all	0.051531	0.0731327	10	10	all	0.095966	0.0653709	10	10	all	0.0453674	0.110877	10	10	all	0.381125	0.011671	10	10	all	0.427828	0.0960645	10	10	all	0.215331	0.0159192	10	10
ACADL	all	0.567448	-0.0447511	10	10	all	0.0381311	-0.0476073	10	10	all	0.116171	-0.0453429	10	10	all	0.690373	0.0592698	10	10	all	0.319216	-0.0487732	10	10	all	0.920608	-0.0230114	10	10	all	0.875041	-0.000374181	10	10	all	0.135097	-0.159733	10	10	all	0.524887	-0.0771084	10	10
ACADM	ENST00000370841.4	0.228869	-0.00566565	10	10	ENST00000370841.4	0.385948	-0.00445247	10	10	ENST00000370841.4	0.562044	-0.000865952	10	10	ENST00000420607.2	0.830228	-0.0286467	10	10	ENST00000420607.2	0.830934	-0.0618618	10	10	ENST00000420607.2	0.798045	-0.0397861	10	10	ENST00000370841.4	0.786156	0.0259394	10	10	ENST00000420607.2	0.79024	-0.00119905	10	10	ENST00000370841.4	0.68535	0.0429532	10	10
ACADS	all	0.792027	-0.00428131	10	10	all	0.25475	0.0119264	10	10	all	0.759656	0.00920764	10	10	all	0.949249	0.0278986	10	10	all	0.285507	-0.067649	10	10	all	0.645295	-0.0953909	10	10	all	0.975035	-0.0225394	10	10	all	0.444864	-0.030812	10	10	all	0.707335	-0.0260918	10	10
ACADSB	all	0.271422	-0.0190075	10	10	all	0.642303	0.00565236	10	10	all	0.256698	-0.0111154	10	10	all	0.0394552	0.0934815	10	10	all	0.0391801	0.0299969	10	10	all	0.0128843	0.0363227	10	10	all	0.0964549	0.0340201	10	10	all	0.0488895	0.0609695	10	10	all	0.0346357	0.0538173	10	10
ACADVL	all	0.758926	0.00116192	10	10	all	0.821708	-0.00497164	10	10	all	0.998511	-0.00222552	10	10	all	0.0431894	0.105007	10	10	all	0.946774	-0.0358286	10	10	all	0.181887	0.0290397	10	10	all	0.0341301	0.0889588	10	10	all	0.838837	0.0196061	10	10	all	0.170449	0.0250479	10	10
ACAN	ENST00000561243.1	0.122546	0.0065666	10	10	ENST00000561243.1	0.313565	0.00228258	10	10	ENST00000561243.1	0.133546	0.00996136	10	10	ENST00000439576.2	0.0755688	-0.0249017	10	10	ENST00000439576.2	0.112	-0.121595	10	10	ENST00000439576.2	0.0606811	-0.0467926	10	10	ENST00000439576.2	0.117923	-0.0344455	10	10	ENST00000439576.2	0.170767	-0.0359152	10	10	ENST00000439576.2	0.102572	-0.0935775	10	10
ACAP1	all	0.200195	-0.0248064	9	9	all	0.688538	-0.0180263	9	9	all	0.417512	-0.0144586	9	9	all	0.139289	0.144181	9	9	all	0.0654503	0.113542	9	9	all	0.105745	0.128862	9	9	all	0.159659	0.0893851	9	9	all	0.0542347	0.0712385	9	9	all	0.100232	0.0803118	9	9
ACAP2	all	0.222144	0.0162477	10	10	all	0.4341	-0.00251593	10	10	all	0.668692	0.00129795	10	10	all	0.622629	0.0161919	10	10	all	0.605432	0.075161	10	10	all	0.463493	0.0125053	10	10	all	0.264081	0.0162969	10	10	all	0.721501	0.011133	10	10	all	0.246691	-0.00640337	10	10
ACAP3	all	0.760689	-0.00715105	10	10	all	0.0649408	-0.0127618	10	10	all	0.111594	-0.00944307	10	10	all	0.694085	-0.0290142	10	10	all	0.662183	0.0379383	10	10	all	0.681272	0.0274431	10	10	all	0.871614	-0.0161166	10	10	all	0.980855	-0.021177	10	10	all	0.996437	0.0207538	10	10
ACAT1	all	0.388415	-0.00604313	10	10	all	0.0157598	-0.0222817	10	10	all	0.0368243	-0.0174827	10	10	all	0.785658	0.0371166	10	10	all	0.75506	-0.00110846	10	10	all	0.725617	0.047435	10	10	all	0.890243	-0.0287419	10	10	all	0.291417	-0.0352687	10	10	all	0.390078	-0.0216846	10	10
ACAT2	all	0.239461	-0.0103154	10	10	all	0.610002	-0.00569567	10	10	all	0.647911	-0.00738178	10	10	all	0.528807	-0.0138172	10	10	all	0.0791421	-0.183414	10	10	all	0.1952	-0.143106	10	10	all	0.440213	-0.0757575	10	10	all	0.188063	-0.159654	10	10	all	0.295754	-0.133843	10	10
ACBD3	all	0.00209693	-0.0388687	10	10	all	0.826942	-0.0247271	10	10	all	0.0236859	-0.0282195	10	10	all	0.0545431	0.202167	10	10	all	0.0908549	0.200935	10	10	all	0.0729985	0.196683	10	10	all	0.128114	0.0264649	10	10	all	0.0379578	0.130628	10	10	all	0.0760889	0.119108	10	10
ACBD4	all	0.0569844	0.0214005	10	10	all	0.601402	0.0130296	10	10	all	0.146475	0.0193436	10	10	all	0.530769	-0.0815734	10	10	all	0.914874	-0.0227943	10	10	all	0.718919	-0.0302863	10	10	all	0.753428	-0.0196704	10	10	all	0.527907	0.0119303	10	10	all	0.680204	0.0176874	10	10
ACBD5	all	0.96076	-0.00618022	10	10	all	0.0571653	-0.0173568	10	10	all	0.153713	-0.0118218	10	10	all	0.681645	-0.0739474	10	10	all	0.421305	-0.0727281	10	10	all	0.445806	-0.0803258	10	10	all	0.706725	-0.0950397	10	10	all	0.127875	-0.073724	10	10	all	0.251941	-0.0524174	10	10
ACBD6	all	0.0334882	-0.00425967	9	9	all	0.60851	-0.000249135	9	9	all	0.220721	-0.00541539	9	9	all	0.423762	0.0104157	9	9	all	0.243389	0.141216	9	9	all	0.283261	0.0472226	9	9	all	0.778852	-0.0367685	9	9	all	0.13864	0.108108	9	9	all	0.391529	0.0312996	9	9
ACBD7	all	0.383094	-0.0208403	10	10	all	0.00947673	-0.0401912	10	10	all	0.0326249	-0.0330867	10	10	all	0.241136	-0.0935663	10	10	all	0.250962	0.0997541	10	10	all	0.972955	-0.0236947	10	10	all	0.129151	-0.108122	10	10	all	0.599547	-0.0227759	10	10	all	0.289119	-0.0841451	10	10
ACCS	all	0.160124	-0.00531839	10	10	all	0.523751	0.0042029	10	10	all	0.442841	-0.00293853	10	10	all	0.295751	0.0287058	10	10	all	0.889985	0.000550462	10	10	all	0.437143	0.00361401	10	10	all	0.67764	0.0176969	10	10	all	0.943868	-0.00300273	10	10	all	0.685516	0.00454791	10	10
ACD	all	0.395853	-0.00788316	10	10	all	0.443452	-0.00465251	10	10	all	0.199517	-0.00969017	10	10	all	0.0540405	0.113902	10	10	all	0.0450326	0.0586278	10	10	all	0.0405729	0.124649	10	10	all	0.128625	0.09673	10	10	all	0.0812113	0.0939796	10	10	all	0.0622006	0.0481594	10	10
ACE	all	0.3156	-0.0259051	10	10	all	0.978908	-0.0019933	10	10	all	0.384133	-0.0133712	10	10	all	0.239822	0.0184478	10	10	all	0.548405	0.0415742	10	10	all	0.278159	0.0310779	10	10	all	0.772679	0.0124865	10	10	all	0.49544	0.0366523	10	10	all	0.490628	0.0203411	10	10
ACE2	ENST00000252519.3	0.456475	-0.0146973	10	10	ENST00000427411.1	0.0778977	-0.0145633	10	10	ENST00000427411.1	0.0803628	-0.00954814	10	10	ENST00000427411.1	0.453966	0.0503378	10	10	ENST00000427411.1	0.0979683	0.100616	10	10	ENST00000427411.1	0.153288	0.086259	10	10	ENST00000427411.1	0.457227	0.0218982	10	10	ENST00000427411.1	0.300629	0.035906	10	10	ENST00000427411.1	0.278203	-0.00573444	10	10
ACER1	all	0.228059	0.029521	9	9	all	0.616283	-0.0112635	9	9	all	0.457602	0.00714464	9	9	all	0.718422	-0.0098928	9	9	all	0.194038	0.17211	9	9	all	0.393798	0.0577404	9	9	all	0.535738	0.0357111	9	9	all	0.0851033	0.102281	9	9	all	0.133988	0.0355011	9	9
ACER2	all	0.824012	-0.010884	10	10	all	0.40661	-0.0176706	10	10	all	0.366593	-0.00430289	10	10	all	0.0456044	-0.0981966	10	10	all	0.106767	-0.0443644	10	10	all	0.0251082	-0.0362466	10	10	all	0.0608448	-0.102468	10	10	all	0.0393438	-0.078968	10	10	all	0.0183596	-0.0745629	10	10
ACER3	all	0.731837	0.0148064	9	9	all	0.589353	-0.00317427	9	9	all	0.344189	0.000608313	9	9	all	0.876548	-0.0046813	9	9	all	0.832281	-0.0921949	9	9	all	0.895619	-0.0216256	9	9	all	0.877247	0.0330761	9	9	all	0.67855	-0.0632852	9	9	all	0.558963	-0.0103398	9	9
ACHE	ENST00000241069.5,ENST00000428317.1	0.0093542	-0.0530628	7	7	ENST00000428317.1	0.294284	0.00607637	2	2	ENST00000241069.5,ENST00000428317.1	0.0851735	-0.0186306	6	6	ENST00000428317.1	0.158075	0.0560981	2	2	ENST00000241069.5	0.346096	0.0378305	2	2	ENST00000428317.1	0.201836	0.0383593	2	2	ENST00000241069.5,ENST00000428317.1	0.00412479	-0.277309	7	7	ENST00000428317.1	0.304297	0.0280786	2	2	ENST00000241069.5,ENST00000428317.1	0.129932	-0.0660193	6	6
ACIN1	all	0.525234	0.0175153	6	6	all	0.42919	-0.00371981	5	5	all	0.511163	-0.00216353	5	5	all	0.110334	-0.0967883	6	6	ENST00000555053.1	0.175205	0.0510686	3	3	ENST00000555053.1	0.241319	0.0340468	3	3	ENST00000555053.1	0.429978	0.018259	3	3	ENST00000555053.1	0.224124	0.0437703	3	3	ENST00000555053.1	0.199632	0.0310147	3	3
ACKR2	ENST00000273145.2	0.748457	-0.0106746	10	10	ENST00000442925.1,ENST00000422265.1	0.0905157	-0.00490799	10	10	ENST00000442925.1,ENST00000422265.1	0.369602	-0.0116187	10	10	ENST00000442925.1,ENST00000422265.1	0.362923	-0.0782729	10	10	ENST00000442925.1,ENST00000422265.1	0.733677	-0.00207639	10	10	ENST00000442925.1,ENST00000422265.1	0.50774	-0.0222068	10	10	ENST00000442925.1,ENST00000422265.1	0.431232	-0.0797973	10	10	ENST00000442925.1,ENST00000422265.1	0.356828	-0.0117191	10	10	ENST00000442925.1,ENST00000422265.1	0.362337	-0.0269405	10	10
ACLY	all	0.758754	-0.000569027	10	10	all	0.799765	0.0017054	10	10	all	0.625237	-0.00110439	10	10	all	0.0092099	0.75298	10	10	all	0.0444848	0.700779	10	10	all	0.0235837	0.726879	10	10	all	0.000788412	0.628806	10	10	all	0.0204131	0.559844	10	10	all	0.00386028	0.594325	10	10
ACN9	all	0.871804	0.0126396	9	9	all	0.349412	0.0108517	9	9	all	0.325201	0.00727728	9	9	all	0.344471	0.018113	9	9	all	0.859292	-0.0573685	9	9	all	0.517532	-0.00668482	9	9	all	0.230157	0.0375515	9	9	all	0.509735	-0.0057634	9	9	all	0.365339	0.00863825	9	9
ACO1	all	0.450079	-0.000409929	10	10	all	0.183369	0.00673525	10	10	all	0.373536	0.00510727	10	10	all	0.344328	0.067566	10	10	all	0.624108	-0.0121191	10	10	all	0.811799	-0.00428395	10	10	all	0.226843	0.0232704	10	10	all	0.947149	0.00647286	10	10	all	0.500426	-0.00132638	10	10
ACO2	all	0.0454247	-0.0326777	10	10	all	0.447529	-0.019659	10	10	all	0.10147	-0.0299062	10	10	all	0.0254705	0.10313	10	10	all	0.0236136	0.116373	10	10	all	0.0127212	0.0545562	10	10	all	0.228694	0.0164521	10	10	all	0.132592	0.0855972	10	10	all	0.112627	0.0249159	10	10
ACOT1	all	0.753309	-0.0109209	9	9	all	0.603436	0.0132006	9	9	all	0.879061	-0.000239043	9	9	all	0.43514	0.0164278	9	9	all	0.922009	-0.0936471	9	9	all	0.534114	-0.0512727	9	9	all	0.281323	-0.0443083	9	9	all	0.883589	-0.0522108	9	9	all	0.407938	-0.0354399	9	9
ACOT11	all	0.850709	-0.0127382	10	10	all	0.613648	-0.00657046	10	10	all	0.655407	-0.00233582	10	10	all	0.244877	-0.0374967	10	10	all	0.632331	-0.0378141	10	10	all	0.367541	-0.0372726	10	10	all	0.372767	-0.0626102	10	10	all	0.937398	-0.035181	10	10	all	0.622233	-0.0555321	10	10
ACOT12	all	0.195078	-0.0139738	9	9	all	0.759987	-0.0230771	9	9	all	0.253204	-0.0213647	9	9	all	0.175978	-0.0877307	8	8	all	0.226714	-0.0129077	9	9	all	0.0681638	-0.0876506	8	8	all	0.203118	-0.0684295	9	9	all	0.192424	-0.070093	9	9	all	0.0833494	-0.0643222	9	9
ACOT13	all	0.748628	-0.00198059	10	10	all	0.0332143	0.0154175	10	10	all	0.160477	0.0125067	10	10	all	0.148233	-0.0916247	10	10	all	0.127641	-0.121613	10	10	all	0.106677	-0.103065	10	10	all	0.192505	-0.0749833	10	10	all	0.423563	-0.0796733	10	10	all	0.275805	-0.0773283	10	10
ACOT2	all	0.945958	-0.0148155	10	10	all	0.221477	0.019146	10	10	all	0.42196	0.0121409	10	10	all	0.0656154	-0.0958871	10	10	all	0.686918	0.0140999	10	10	all	0.533602	-0.0385259	10	10	all	0.0693028	-0.0457535	10	10	all	0.266507	0.0187799	10	10	all	0.860481	-0.036283	10	10
ACOT4	all	0.48274	-0.0092585	10	10	all	0.640443	-0.0251501	10	10	all	0.492292	-0.0125319	10	10	all	0.733166	0.0169737	10	10	all	0.0334142	0.117558	10	10	all	0.0850526	0.0657806	10	10	all	0.711981	-0.0187125	10	10	all	0.155412	0.0863742	10	10	all	0.528431	0.0295546	10	10
ACOT6	all	0.579912	-0.00656907	10	10	all	0.945547	0.000902504	10	10	all	0.641907	-0.00374529	10	10	all	0.601688	-0.0313799	10	10	all	0.531733	-0.00253582	10	10	all	0.78079	-0.0358889	10	10	all	0.751541	-0.0255476	10	10	all	0.581732	-0.0680808	10	10	all	0.774617	-0.058529	10	10
ACOT7	ENST00000377845.3	0.16149	-0.0209518	8	8	ENST00000377845.3	0.0745119	-0.0629847	8	8	ENST00000377845.3	0.111801	-0.0471333	8	8	ENST00000608083.1	0.0528612	-0.134658	7	7	ENST00000377845.3	0.193052	0.205396	8	8	ENST00000377845.3	0.252784	0.160779	8	8	ENST00000608083.1	0.0694822	-0.132693	7	7	ENST00000377845.3	0.767973	0.0345941	8	8	ENST00000608083.1	0.303678	-0.0824645	7	7
ACOT8	all	0.688754	0.00981413	10	10	all	0.119085	-0.00552173	10	10	all	0.578864	-0.00447412	10	10	all	0.0192745	-0.128607	10	10	all	0.265285	-0.0314282	10	10	all	0.0598155	-0.103018	10	10	all	0.0353723	-0.100833	10	10	all	0.165005	-0.0484588	10	10	all	0.0517173	-0.0931962	10	10
ACOT9	all	0.798302	-0.00422503	10	10	all	0.63681	-0.0255542	10	10	all	0.250818	-0.00358729	10	10	all	0.890209	-0.0418556	10	10	all	0.735593	-0.0618055	10	10	all	0.637759	0.000951919	10	10	all	0.82221	-0.0284244	10	10	all	0.487475	-0.0636249	10	10	all	0.329265	-0.0215024	10	10
ACOX1	all	0.0864325	0.0182465	7	7	ENST00000301608.4	0.100361	0.0089563	3	3	ENST00000301608.4	0.0622634	0.00812973	3	3	ENST00000301608.4	0.312587	-0.046718	3	3	ENST00000293217.5	0.540595	-0.0156012	3	3	ENST00000293217.5	0.413259	-0.0176818	3	3	all	0.53792	0.0391919	7	7	all	0.313001	0.0410139	7	7	all	0.310141	0.0268925	7	7
ACOX2	all	0.0715041	-0.0651761	10	10	all	0.936467	-0.0373735	10	10	all	0.530684	-0.0563908	10	10	all	0.891639	0.134004	10	10	all	0.192956	-0.00269363	10	10	all	0.511956	0.0526295	10	10	all	0.67347	-0.0277232	10	10	all	0.260169	-0.106932	10	10	all	0.357591	-0.0443558	10	10
ACOX3	ENST00000503233.1	0.150782	0.00572593	8	8	ENST00000356406.5	0.480759	-0.0422642	10	10	ENST00000356406.5	0.329103	-0.0276888	10	10	ENST00000503233.1	0.0188403	-0.161563	8	8	ENST00000356406.5	0.207569	-0.0261523	10	10	ENST00000356406.5	0.0365193	-0.117076	9	9	ENST00000356406.5	0.00498666	-0.138951	10	10	ENST00000356406.5	0.0133716	-0.0893011	10	10	ENST00000356406.5	0.00156102	-0.10312	10	10
ACOXL	all	0.734202	-0.0181531	10	10	all	0.493719	-0.0140756	10	10	all	0.633509	-0.0147134	10	10	all	0.903581	-0.0442367	10	10	all	0.674197	0.100853	10	10	all	0.85588	0.00765474	10	10	all	0.812599	-0.0616713	10	10	all	0.80135	0.061815	10	10	all	0.86697	-0.0219286	10	10
ACP1	all	0.944474	-0.00463742	10	10	all	0.333158	-0.00230665	10	10	all	0.496435	-0.00311951	10	10	all	0.867117	-0.0258874	10	10	all	0.226095	-0.0793263	10	10	all	0.430361	-0.035837	10	10	all	0.692085	0.0280396	10	10	all	0.122673	-0.0613588	10	10	all	0.306536	-0.0302605	10	10
ACP2	all	0.197841	0.012191	10	10	all	0.8328	0.00146737	10	10	all	0.548473	0.00640576	10	10	all	0.818875	-0.0249123	10	10	all	0.847856	0.0277174	10	10	all	0.904	0.0142031	10	10	all	0.539246	-0.0194263	10	10	all	0.863758	0.0218435	10	10	all	0.61125	-0.0188877	10	10
ACP5	ENST00000433365.2	0.428822	0.00677005	10	10	ENST00000218758.5,ENST00000412435.2,ENST00000592828.1	0.207015	-0.00289679	10	10	ENST00000433365.2	0.130585	0.00351332	10	10	ENST00000218758.5,ENST00000412435.2,ENST00000592828.1	0.498136	0.0718295	10	10	ENST00000433365.2	0.459917	-0.00644005	10	10	ENST00000433365.2	0.459224	-0.000926485	10	10	ENST00000218758.5,ENST00000412435.2,ENST00000592828.1	0.432954	0.0300482	10	10	ENST00000433365.2	0.835088	0.00447158	10	10	ENST00000218758.5,ENST00000412435.2,ENST00000592828.1	0.526141	0.0044024	10	10
ACP6	all	0.187503	-0.00877944	10	10	all	0.802909	-0.0145305	10	10	all	0.192671	-0.0135377	10	10	all	0.521913	0.0738491	10	10	all	0.550366	0.0176286	10	10	all	0.407882	0.0238616	10	10	all	0.481789	0.0293326	10	10	all	0.775191	-0.0355136	10	10	all	0.423709	-0.000609337	10	10
ACPL2	all	0.554734	0.00432878	10	10	all	0.05253	-0.0118091	10	10	all	0.324862	-0.0031551	10	10	all	0.155321	0.0115014	10	10	all	0.0902303	0.103727	10	10	all	0.0760549	0.0303528	10	10	all	0.111622	0.0140669	10	10	all	0.299312	0.0808928	10	10	all	0.161533	0.0259139	10	10
ACPP	all	0.776962	-0.0078535	10	10	all	0.302573	-0.0059157	10	10	all	0.536258	-0.0125827	10	10	all	0.203239	-0.0241671	10	10	all	0.47014	-0.022976	10	10	all	0.780355	-0.0235715	10	10	all	0.16533	-0.0405887	10	10	all	0.51536	-0.0413132	10	10	all	0.78329	-0.040951	10	10
ACPT	all	0.0656777	-0.0287297	10	10	all	0.644936	-0.0103704	10	10	all	0.117013	-0.0132457	10	10	all	0.555813	0.102136	10	10	all	0.430668	0.0250215	10	10	all	0.801981	0.0442702	10	10	all	0.768748	-0.0362818	10	10	all	0.582274	-0.0494102	10	10	all	0.909216	-0.0445036	10	10
ACR	all	0.611306	-0.00381968	10	10	all	0.705521	-0.00663786	10	10	all	0.539467	-0.00284105	10	10	all	0.424675	-0.0619614	10	10	all	0.0841731	-0.116332	10	10	all	0.123708	-0.0570028	10	10	all	0.268063	-0.0396172	10	10	all	0.050618	-0.0361507	10	10	all	0.0610366	-0.0350744	10	10
ACRBP	all	0.674213	-0.0318335	10	10	all	0.516421	-0.0248652	10	10	all	0.553155	-0.0248017	10	10	all	0.0997126	0.030161	10	10	all	0.409811	0.0403735	10	10	all	0.155978	0.0708858	10	10	all	0.427933	0.0249425	10	10	all	0.923127	0.0112823	10	10	all	0.602635	-0.0114917	10	10
ACRC	ENST00000373695.1	0.496334	-0.00310793	10	10	ENST00000373695.1	0.487676	0.018996	10	10	ENST00000373695.1	0.719874	0.00587443	10	10	ENST00000373695.1	0.249332	0.039845	10	10	ENST00000373695.1	0.0119964	0.0351402	10	10	ENST00000373695.1	0.0257926	0.0323653	10	10	ENST00000373695.1	0.490204	0.039191	10	10	ENST00000373695.1	0.137144	0.0793372	10	10	ENST00000373695.1	0.190985	0.0592641	10	10
ACSBG1	all	0.653341	-0.0040795	10	10	all	0.79754	-0.00412253	10	10	all	0.547494	-0.00556259	10	10	all	0.729552	0.0263794	10	10	all	0.923309	0.0638326	10	10	all	0.838858	0.0293868	10	10	all	0.59865	0.0283832	10	10	all	0.91385	0.0162696	10	10	all	0.759335	0.023844	10	10
ACSBG2	all	0.276425	-0.0190145	10	10	all	0.945233	-0.00590853	10	10	all	0.186829	-0.00328567	10	10	all	0.163021	-0.0914786	10	10	all	0.431429	-0.0294192	10	10	all	0.1366	-0.0259932	10	10	all	0.0609771	-0.08581	10	10	all	0.400462	-0.0515305	10	10	all	0.0567945	-0.0464655	10	10
ACSF2	all	0.544485	-0.0288155	10	10	all	0.0453355	-0.0400948	10	10	all	0.045249	-0.0217843	10	10	all	0.162493	-0.113039	10	10	all	0.608	-0.0201956	10	10	all	0.181221	-0.0595449	10	10	all	0.0773488	-0.114733	10	10	all	0.129466	-0.096911	10	10	all	0.0150296	-0.0471817	10	10
ACSF3	all	0.113001	-0.024862	10	10	all	0.561719	-0.00568803	10	10	all	0.250631	-0.0181488	10	10	all	0.769363	0.0205178	10	10	all	0.684217	0.0334076	10	10	all	0.699961	0.0316078	10	10	all	0.509877	-0.0259857	10	10	all	0.715759	0.0129578	10	10	all	0.973707	-0.0249905	10	10
ACSL1	ENST00000281455.2	0.0592261	-0.0418358	9	9	ENST00000281455.2	0.326334	-0.0114556	9	9	ENST00000281455.2	0.46609	-0.0253154	9	9	ENST00000504342.1	0.219086	-0.0701166	7	7	ENST00000504342.1	0.09096	-0.0660215	7	7	ENST00000504342.1	0.0690191	-0.0709809	7	7	ENST00000281455.2	0.0191179	-0.0847158	9	9	ENST00000504342.1	0.0313914	-0.0681925	7	7	ENST00000504342.1	0.0464445	-0.0500802	7	7
ACSL3	all	0.620127	0.00174553	10	10	all	0.021565	-0.0342779	10	10	all	0.113155	-0.0191838	10	10	all	0.894276	-0.0451725	10	10	all	0.208856	0.0962905	10	10	all	0.54708	0.0283557	10	10	all	0.923723	-0.0367085	10	10	all	0.998468	0.020547	10	10	all	0.964062	0.0107873	10	10
ACSL4	all	0.0488287	-0.0252795	10	10	all	0.898542	0.000214577	10	10	all	0.23736	-0.0121864	10	10	all	0.025777	0.135979	10	10	all	0.382257	0.0440295	10	10	all	0.0728899	0.124655	10	10	all	0.0708228	0.0424339	10	10	all	0.300471	0.0301053	10	10	all	0.0934203	0.0362696	10	10
ACSL5	ENST00000354655.4	0.210267	0.0187697	9	9	ENST00000393081.1	0.0876556	0.0211373	6	6	ENST00000354273.4	0.38978	0.0125041	10	10	ENST00000354655.4	0.0785598	-0.0786137	9	9	ENST00000354655.4	0.0169597	-0.0892116	9	9	ENST00000354655.4	0.0157738	-0.0754692	9	9	ENST00000354655.4	0.225132	-0.0619296	9	9	ENST00000354655.4	0.00549041	-0.0817234	9	9	ENST00000354655.4	0.0307497	-0.0642486	9	9
ACSL6	ENST00000379240.1	0.282973	-0.0161431	8	8	ENST00000379244.1	0.33274	-0.000638829	7	7	ENST00000379244.1	0.450561	-0.0128677	7	7	ENST00000379240.1	0.170531	0.0136368	8	8	ENST00000379240.1	0.161452	-0.000504284	8	8	ENST00000379240.1	0.130134	0.00656627	8	8	ENST00000379240.1	0.191284	-0.0180718	8	8	ENST00000379240.1	0.126831	0.0036401	8	8	ENST00000379240.1	0.118456	-0.00721586	8	8
ACSM1	ENST00000307493.4	0.180786	-0.0142089	9	9	ENST00000520010.1	0.579448	0.00546359	10	10	ENST00000307493.4	0.155891	-0.00637982	9	9	ENST00000520010.1	0.0327161	-0.0900068	10	10	ENST00000520010.1	0.242933	-0.0204327	10	10	ENST00000520010.1	0.065762	-0.033811	10	10	ENST00000520010.1	0.0852138	-0.043858	10	10	ENST00000520010.1	0.280229	-0.0260863	10	10	ENST00000520010.1	0.146895	-0.0756573	10	10
ACSM2A	ENST00000573854.1,ENST00000219054.6	0.128396	-0.0193733	1	1	ENST00000573854.1,ENST00000219054.6,ENST00000575690.1	0.120252	-0.0121103	8	8	ENST00000573854.1,ENST00000219054.6	0.126213	-0.0142732	1	1	ENST00000396104.2	0.0220452	-0.0265226	10	10	ENST00000575690.1	0.165584	-0.0812006	1	1	ENST00000396104.2	0.0778124	-0.0201118	10	10	ENST00000396104.2	0.0272006	-0.0230922	10	10	ENST00000575690.1	0.306709	-0.0398501	1	1	ENST00000396104.2	0.138395	-0.0232645	10	10
ACSM2B	ENST00000565232.1,ENST00000567001.1	0.617604	0.00289242	2	2	ENST00000565232.1,ENST00000567001.1	0.172108	-0.00844576	2	2	ENST00000565232.1,ENST00000567001.1	0.482001	-0.00277667	2	2	all	0.0930898	0.0658408	6	6	ENST00000565232.1,ENST00000567001.1	0.307449	0.0344953	2	2	ENST00000329697.6,ENST00000567001.1	0.323934	-0.0347146	2	2	all	0.0831163	0.0563038	6	6	ENST00000565232.1,ENST00000567001.1	0.622384	0.0130365	2	2	ENST00000329697.6,ENST00000567001.1	0.338462	-0.021994	2	2
ACSM3	all	0.752013	0.00518227	10	10	all	0.331608	0.0110179	10	10	all	0.614785	0.00049726	10	10	all	0.0874416	0.0190251	10	10	all	0.36191	0.0487697	10	10	all	0.160922	0.0420291	10	10	all	0.160848	0.0265692	10	10	all	0.26223	0.0799933	10	10	all	0.151517	0.0423225	10	10
ACSM4	all	0.899312	0.0110138	10	10	all	0.185161	-0.0132121	10	10	all	0.74806	-0.00981928	10	10	all	0.137116	-0.0363902	10	10	all	0.398853	0.0722821	10	10	all	0.690343	0.0310747	10	10	all	0.194479	-0.0275309	10	10	all	0.819164	0.062065	10	10	all	0.450927	0.0319198	10	10
ACSM5	all	0.119516	-0.0310416	9	9	all	0.725953	-0.00123527	8	8	all	0.305138	0.0085667	8	8	all	0.905462	-0.0527942	8	8	all	0.369539	-0.068986	8	8	all	0.717125	-0.109062	8	8	all	0.892056	-0.0269836	9	9	all	0.573369	-0.0548983	8	8	all	0.980786	-0.0919612	8	8
ACSS1	all	0.34615	-0.0103777	10	10	all	0.767042	-0.00134468	10	10	all	0.442706	-0.00302932	10	10	all	0.724078	-0.0171634	10	10	all	0.236426	0.108487	10	10	all	0.621038	0.0447293	10	10	all	0.594928	-0.0331411	10	10	all	0.200318	0.0917119	10	10	all	0.724814	0.0268132	10	10
ACSS2	all	0.795642	-0.0263307	10	10	all	0.454246	-0.00198124	10	10	all	0.625077	-0.0105171	10	10	all	0.0236449	0.409113	10	10	all	0.158183	0.352453	10	10	all	0.0506977	0.407583	10	10	all	0.027808	0.328246	10	10	all	0.173516	0.270833	10	10	all	0.0724397	0.326882	10	10
ACSS3	ENST00000548058.1	0.1399	-0.00209995	10	10	ENST00000261206.3	0.299984	0.00604369	10	10	ENST00000548058.1	0.361454	0.000536593	10	10	ENST00000548058.1	0.135286	-0.113954	9	9	ENST00000548058.1	0.0805035	-0.185418	10	10	ENST00000548058.1	0.124919	-0.074207	9	9	ENST00000548058.1	0.209718	-0.0909583	10	10	ENST00000548058.1	0.0659385	-0.144048	10	10	ENST00000548058.1	0.081022	-0.117503	10	10
ACTA1	all	0.256629	-0.00929101	9	9	all	0.24736	-0.0158208	9	9	all	0.104415	-0.00992556	9	9	all	0.283483	-0.0385533	9	9	all	0.585881	-0.0316574	9	9	all	0.306013	0.0142619	9	9	all	0.159641	-0.0353074	9	9	all	0.261372	-0.0242418	9	9	all	0.15121	-0.0290608	9	9
ACTA2	ENST00000224784.6	0.371556	0.0153171	10	10	ENST00000224784.6	0.666482	0.00579082	10	10	ENST00000224784.6	0.198173	0.00697861	10	10	ENST00000224784.6	0.221234	0.0692182	10	10	ENST00000224784.6	0.382442	0.0923475	10	10	ENST00000224784.6	0.252199	0.0807828	10	10	ENST00000224784.6	0.13603	0.0742462	10	10	ENST00000224784.6	0.228733	0.071066	10	10	ENST00000224784.6	0.128651	0.0700406	10	10
ACTB	all	0.06487	-0.0138873	10	10	all	0.242564	-0.0122993	10	10	all	0.0685449	-0.0201861	10	10	all	0.00215396	0.179819	10	10	all	0.0255115	0.1685	10	10	all	0.0068638	0.160714	10	10	all	0.00558733	0.133607	10	10	all	0.109573	0.136404	10	10	all	0.0176991	0.128355	10	10
ACTBL2	all	0.199024	-0.0103203	10	10	all	0.461672	0.00841309	10	10	all	0.629889	-0.00412557	10	10	all	0.224689	-0.0206819	10	10	all	0.443641	-0.037312	10	10	all	0.251169	-0.0260421	10	10	all	0.108231	-0.0800701	10	10	all	0.626741	-0.0241986	10	10	all	0.270608	-0.034802	10	10
ACTC1	all	0.0562665	0.0323474	10	10	all	0.11335	-0.0171996	10	10	all	0.422941	0.00984672	10	10	all	0.114535	-0.0412553	10	10	all	0.672423	0.00823929	10	10	all	0.229993	-0.0163911	10	10	all	0.770777	-0.0142099	10	10	all	0.334057	-0.0225882	10	10	all	0.380302	0.0132632	10	10
ACTG1	all	0.0951601	-0.0180456	10	10	all	0.146557	-0.0211876	10	10	all	0.0663585	-0.0227343	10	10	all	0.0146824	0.110544	10	10	all	0.0410846	0.138988	10	10	all	0.00953264	0.117283	10	10	all	0.146583	0.0844921	10	10	all	0.159056	0.100398	10	10	all	0.137525	0.0924452	10	10
ACTG2	all	0.883818	-0.030346	10	10	all	0.0790188	-0.0186075	9	9	all	0.278332	-0.0031126	9	9	all	0.178136	-0.0205845	9	9	all	0.97837	-0.0213344	9	9	all	0.388918	-0.0379386	9	9	all	0.0857479	-0.177249	10	10	all	0.597453	-0.0345814	9	9	all	0.262301	-0.0340792	9	9
ACTL6A	all	0.00931867	-0.0781266	10	10	all	0.0174632	-0.0816035	10	10	all	0.0114003	-0.0767042	10	10	all	0.087201	0.124661	10	10	all	0.000396323	0.257094	9	9	all	0.00240098	0.281702	9	9	all	0.05217	0.00647028	10	10	all	0.0212551	-0.0185489	10	10	all	0.0160238	-0.00603932	10	10
ACTL6B	all	0.232937	0.0449227	10	10	all	0.622325	0.00228065	10	10	all	0.35342	0.0186963	10	10	all	0.412514	0.0444669	10	10	all	0.395732	0.036044	10	10	all	0.215984	0.0213246	10	10	all	0.0327313	0.0421532	10	10	all	0.203833	0.0316151	10	10	all	0.0425469	0.0368842	10	10
ACTL7A	all	0.0213745	0.0310468	9	9	all	0.0516668	0.0238624	9	9	all	0.0209511	0.0274546	9	9	all	0.043151	-0.127764	9	9	all	0.0128081	-0.0902353	9	9	all	0.0144416	-0.100858	9	9	all	0.371443	-0.0369934	9	9	all	0.187356	-0.0409614	9	9	all	0.239581	-0.0422475	9	9
ACTL7B	all	0.440414	-0.0197525	10	10	all	0.00193874	-0.025883	10	10	all	0.00195089	-0.0152821	10	10	all	0.38857	-0.0463246	10	10	all	0.819226	-0.0163159	10	10	all	0.985234	-0.0538002	10	10	all	0.164676	-0.0475307	10	10	all	0.559106	-0.0541803	10	10	all	0.351888	-0.0612057	10	10
ACTL8	all	0.287944	0.0133462	9	9	all	0.225927	0.014648	9	9	all	0.448987	0.0135485	9	9	all	0.112902	-0.0344204	9	9	all	0.242235	-0.0361725	9	9	all	0.0461817	-0.00284952	9	9	all	0.431451	-0.0355382	9	9	all	0.43447	-0.0195961	9	9	all	0.285229	-0.0124718	9	9
ACTN1	all	0.747602	-0.0149072	8	8	all	0.340398	-0.000461859	8	8	all	0.95367	-0.000852309	8	8	all	0.0132545	-0.0963679	8	8	all	0.159343	-0.0244989	8	8	all	0.0440862	-0.0838811	8	8	all	0.0114036	-0.103409	8	8	all	0.316036	-0.0309657	8	8	all	0.0646907	-0.0825802	8	8
ACTN2	all	0.309967	-0.00496592	10	10	all	0.211627	0.0172727	10	10	all	0.992737	0.0100643	10	10	all	0.391625	0.0513381	10	10	all	0.965643	0.0337736	10	10	all	0.433611	0.0257688	10	10	all	0.842526	0.05307	10	10	all	0.51598	0.0502713	10	10	all	0.288092	0.051883	10	10
ACTN3	all	0.796252	0.00574909	10	10	all	0.0158775	0.016739	10	10	all	0.0735858	0.0129211	10	10	all	0.307979	0.0666658	10	10	all	0.758456	0.067073	10	10	all	0.690092	0.0628607	10	10	all	0.257566	0.0590232	10	10	all	0.674958	0.0727897	10	10	all	0.395086	0.0606244	10	10
ACTN4	all	0.273761	0.00496716	7	7	all	0.575774	0.0127543	7	7	all	0.421657	0.00348726	7	7	all	0.951613	-0.00802816	7	7	all	0.966876	0.0255508	8	8	all	0.788914	0.00461796	7	7	all	0.541223	0.019693	7	7	all	0.744834	0.0456773	8	8	all	0.835852	0.0156768	7	7
ACTR10	all	0.000110055	-0.135602	9	9	all	2.49531e-05	-0.128937	9	9	all	5.27712e-05	-0.130726	9	9	all	0.00835127	0.211036	8	8	all	0.000537334	0.17455	8	8	all	0.000678652	0.180117	8	8	all	0.0360618	-0.053471	9	9	all	0.105353	-0.241155	9	9	all	0.0777933	-0.126422	9	9
ACTR1A	all	0.670339	-0.0107316	10	10	all	0.107008	-0.025258	10	10	all	0.126717	-0.0178274	10	10	all	0.896511	0.0190249	10	10	all	0.806683	0.00802185	10	10	all	0.792195	0.00893269	10	10	all	0.843233	-0.00886467	10	10	all	0.439432	-0.0584028	10	10	all	0.548364	-0.0176951	10	10
ACTR1B	all	0.518893	-0.0107855	9	9	all	0.0804415	0.0172062	9	9	all	0.374162	0.00163698	9	9	all	0.849672	0.00922438	10	10	all	0.854149	0.0875997	10	10	all	0.840981	0.0205468	10	10	all	0.460619	0.00831473	10	10	all	0.449826	0.0485083	10	10	all	0.922134	0.049701	10	10
ACTR2	all	0.955674	0.00334959	10	10	all	0.440132	-0.0134514	10	10	all	0.73908	-0.00646975	10	10	all	0.413675	0.0929891	10	10	all	0.366872	0.119117	10	10	all	0.400421	0.106053	10	10	all	0.239597	0.0666346	10	10	all	0.490525	0.0845758	10	10	all	0.339912	0.0756052	10	10
ACTR3	all	0.0935694	-0.00582346	10	10	all	0.768984	-0.0061901	10	10	all	0.279458	0.0013338	10	10	all	0.0185458	0.211663	10	10	all	0.0428343	0.234963	10	10	all	0.0314592	0.223313	10	10	all	0.0429962	0.165535	10	10	all	0.0135075	0.164924	10	10	all	0.0307665	0.165229	10	10
ACTR3B	all	0.0968972	0.0143218	10	10	all	0.0831626	-0.017876	10	10	all	0.751318	0.00325635	10	10	all	0.675395	0.0131331	10	10	all	0.596307	0.0373247	10	10	all	0.960503	0.0358719	10	10	all	0.875085	0.0149586	10	10	all	0.887656	0.0198455	10	10	all	0.939569	0.0268567	10	10
ACTR3C	ENST00000252071.4	0.659956	0.00212523	10	10	ENST00000539352.1	0.398134	-0.0216931	10	10	ENST00000252071.4	0.402749	0.00568752	10	10	ENST00000252071.4	0.0997358	0.0315532	10	10	ENST00000252071.4	0.250775	0.0140537	10	10	ENST00000252071.4	0.0841544	0.0147287	10	10	ENST00000252071.4	0.061603	0.0277518	10	10	ENST00000252071.4	0.150128	0.0203622	10	10	ENST00000252071.4	0.0504125	0.0193867	10	10
ACTR5	all	0.0563394	-0.0988893	10	10	all	0.0101695	-0.0973076	10	10	all	0.0275517	-0.095906	10	10	all	0.25335	0.149728	10	10	all	0.241522	0.0739148	10	10	all	0.313263	0.131282	10	10	all	0.0526508	-0.0600574	10	10	all	0.0953975	-0.143025	10	10	all	0.0297061	-0.136316	10	10
ACTR6	all	0.712192	-0.0176899	10	10	all	0.666071	-0.00619588	10	10	all	0.6	-0.0112787	10	10	all	0.827276	-0.175215	10	10	all	0.173474	-0.074768	10	10	all	0.425677	-0.220966	10	10	all	0.74843	-0.0898254	9	9	all	0.325011	-0.0618431	10	10	all	0.65224	-0.0860334	9	9
ACTR8	all	0.000258292	-0.124197	10	10	all	0.203439	-0.0983418	10	10	all	0.001812	-0.111269	10	10	all	0.00218348	0.355032	10	10	all	0.103923	0.317529	10	10	all	0.034123	0.336281	10	10	all	0.0726756	0.0268924	10	10	all	0.217158	0.0264767	10	10	all	0.15239	0.0807364	10	10
ACTRT1	all	0.00125976	0.0341823	10	10	all	0.867421	0.0210559	10	10	all	0.0321402	0.0197825	10	10	all	0.423266	-0.0152192	10	10	all	0.0886841	-0.0409431	10	10	all	0.0659283	-0.0156326	10	10	all	0.712276	0.0694377	10	10	all	0.30269	-0.0345623	10	10	all	0.720409	0.00340083	10	10
ACTRT2	all	0.713371	-0.00256524	10	10	all	0.938669	-0.0166633	10	10	all	0.798162	-0.00494488	10	10	all	0.513753	-0.10966	10	10	all	0.396078	0.0501735	10	10	all	0.97792	0.0149066	10	10	all	0.438242	-0.0404501	10	10	all	0.526579	0.0332043	10	10	all	0.963791	0.000804358	10	10
ACTRT3	all	0.332137	-0.0203896	10	10	all	0.0928747	-0.00654191	10	10	all	0.0357758	-0.0121278	10	10	all	0.192435	-0.0469215	10	10	all	0.294474	-0.0340976	10	10	all	0.19712	-0.0275503	10	10	all	0.0559974	-0.055461	10	10	all	0.07787	-0.0253127	10	10	all	0.0653065	-0.0702855	10	10
ACVR1	ENST00000434821.1	0.042739	-0.0264877	8	8	ENST00000434821.1	0.0503131	-0.0218136	8	8	ENST00000434821.1	0.0339162	-0.0232774	8	8	ENST00000434821.1	0.291149	0.00565498	8	8	ENST00000263640.3	0.0171017	0.115101	8	8	ENST00000263640.3	0.0476345	0.0791771	8	8	ENST00000409283.2	0.192997	-0.0306106	3	3	ENST00000263640.3	0.0403484	0.0767991	8	8	ENST00000263640.3	0.0528196	0.0524598	8	8
ACVR1B	all	0.846992	-0.00996726	10	10	all	0.190309	0.0035993	10	10	all	0.330001	-0.0056099	10	10	all	0.257841	0.0291051	10	10	all	0.171093	-0.0530786	10	10	all	0.245556	-0.0436725	10	10	all	0.279453	-0.0399914	10	10	all	0.256341	-0.0302596	10	10	all	0.240249	-0.0329137	10	10
ACVR1C	all	0.282502	-0.0269368	10	10	all	0.914836	-0.0021345	10	10	all	0.623957	-0.0151242	10	10	all	0.653841	0.0257196	10	10	all	0.617484	0.0169166	10	10	all	0.606013	0.0254838	10	10	all	0.743325	-0.0315389	10	10	all	0.696584	-0.0208338	10	10	all	0.930758	-0.0244302	10	10
ACVR2A	all	0.532252	0.0104027	10	10	all	0.119822	0.0103172	10	10	all	0.180676	0.00958956	10	10	all	0.468821	0.0398322	10	10	all	0.395763	0.0380976	10	10	all	0.333446	0.0394569	10	10	all	0.232715	0.0284319	10	10	all	0.144034	0.0582444	10	10	all	0.118298	0.0516952	10	10
ACVR2B	all	0.415984	0.00124053	10	10	all	0.00685079	0.0232985	10	10	all	0.0565489	0.01764	10	10	all	0.0098325	0.149193	10	10	all	0.00144961	0.147245	10	10	all	0.000950103	0.124495	10	10	all	0.00246851	0.111068	10	10	all	6.15448e-05	0.135939	10	10	all	9.63032e-05	0.115128	10	10
ACVRL1	all	0.754158	-0.00449682	10	10	all	0.289905	0.00678864	10	10	all	0.317416	-0.00262928	10	10	all	0.742719	0.0289975	10	10	all	0.0904883	0.0894136	10	10	all	0.264063	0.0760853	10	10	all	0.859486	0.026625	10	10	all	0.13591	0.0667385	10	10	all	0.333543	0.0270428	10	10
ACY1	all	0.931847	-0.019568	10	10	all	0.546433	-0.0174269	10	10	all	0.653938	-0.0173036	10	10	all	0.838701	0.0234932	10	10	all	0.654494	0.00271094	10	10	all	0.945626	0.0171714	10	10	all	0.873394	-0.031189	10	10	all	0.450469	-0.0260557	10	10	all	0.653726	-0.0347223	10	10
ACY3	all	0.26563	-0.0134343	10	10	all	0.6849	-0.00376149	10	10	all	0.915305	-0.0162871	10	10	all	0.326576	0.035627	10	10	all	0.0809747	0.0882244	10	10	all	0.100389	0.068759	10	10	all	0.577826	0.0211738	10	10	all	0.0968532	0.0287414	10	10	all	0.192447	0.054951	10	10
ACYP1	all	0.418644	-0.0163896	10	10	all	0.040326	-0.0150891	10	10	all	0.0183029	-0.00975288	10	10	all	0.51066	0.0527913	10	10	all	0.39413	0.0226995	10	10	all	0.410066	0.0017626	10	10	all	0.829909	0.0365482	10	10	all	0.938476	-0.0266699	10	10	all	0.842663	-0.0111737	10	10
ACYP2	all	0.364284	-0.0595841	10	10	all	0.190692	-0.0908755	10	10	all	0.218102	-0.0782295	10	10	all	0.109672	0.163438	10	10	all	0.0616668	0.211947	10	10	all	0.0589754	0.182461	10	10	all	0.53619	0.0205344	10	10	all	0.540646	0.0181571	10	10	all	0.477213	0.0151384	10	10
ADA	all	0.590787	-0.0158222	10	10	all	0.103082	-0.0222627	10	10	all	0.11704	-0.00829527	10	10	all	0.205092	0.036164	10	10	all	0.156706	0.0248542	10	10	all	0.115584	0.0251041	10	10	all	0.489033	0.0904335	10	10	all	0.64896	0.0130052	10	10	all	0.459116	0.0318784	10	10
ADAD1	all	0.014928	0.0225563	10	10	all	0.848702	-0.00844539	10	10	all	0.0619679	0.00777061	10	10	all	0.66995	0.0623642	10	10	all	0.364924	0.202639	10	10	all	0.312287	0.0929764	10	10	all	0.257875	0.0828289	10	10	all	0.471756	0.155911	10	10	all	0.183127	0.124967	10	10
ADAD2	all	0.0211195	0.00706049	10	10	all	0.190692	0.0045478	10	10	all	0.0199242	0.00640553	10	10	all	0.0719583	-0.0791435	10	10	all	0.226551	-0.01048	10	10	all	0.0692073	-0.0536827	10	10	all	0.345138	-0.0184791	10	10	all	0.582197	-0.0160582	10	10	all	0.433602	-0.0230773	10	10
ADAL	ENST00000422466.2	0.615034	-0.0188165	10	10	ENST00000422466.2	0.232579	-0.00776203	10	10	ENST00000562188.1	0.660315	0.00767711	10	10	ENST00000422466.2	0.363998	-0.0331067	10	10	ENST00000422466.2	0.467503	0.0586379	10	10	ENST00000562188.1	0.884306	-0.0266335	10	10	ENST00000422466.2	0.326591	-0.0558924	10	10	ENST00000422466.2	0.351141	0.0355133	10	10	ENST00000422466.2	0.799405	-0.00210073	10	10
ADAM10	all	0.0241367	-0.042166	10	10	all	0.142746	-0.0352278	10	10	all	0.0102069	-0.0355331	10	10	all	0.363251	0.0435577	10	10	all	0.768499	0.0810141	10	10	all	0.642698	0.0766213	10	10	all	0.648622	-0.0420051	10	10	all	0.912999	0.0121931	10	10	all	0.688843	0.00790299	10	10
ADAM11	all	0.163444	-0.0355957	10	10	all	0.0881209	-0.0202907	10	10	all	0.0526657	-0.0254773	10	10	all	0.937957	-0.00561179	10	10	all	0.726156	0.0221575	10	10	all	0.8332	0.0326256	10	10	all	0.560883	-0.0431287	10	10	all	0.800084	-0.0270087	10	10	all	0.662561	-0.039763	10	10
ADAM12	all	0.424845	-0.00879174	10	10	all	0.786786	0.00338481	10	10	all	0.734731	0.00388716	10	10	all	0.543031	-0.0261432	10	10	all	0.188986	-0.05616	10	10	all	0.245832	-0.0386585	10	10	all	0.629244	-0.0111121	10	10	all	0.270611	-0.0285881	10	10	all	0.361206	-0.0213311	10	10
ADAM15	all	0.743795	-0.0191196	10	10	all	0.982738	-0.0144733	10	10	all	0.890231	-0.0152823	10	10	all	0.326743	0.150292	10	10	all	0.179004	0.201995	10	10	all	0.146216	0.168228	10	10	all	0.296413	0.106317	10	10	all	0.156944	0.14492	10	10	all	0.124744	0.110358	10	10
ADAM17	all	0.721095	-0.00254314	10	10	all	0.287159	0.000441913	10	10	all	0.696908	0.00229455	10	10	all	0.687126	-0.0676987	10	10	all	0.0367663	-0.0973766	10	10	all	0.139487	-0.0765369	10	10	all	0.626719	-0.0282873	10	10	all	0.0794731	-0.0849393	10	10	all	0.162586	-0.033082	10	10
ADAM18	all	0.774538	-0.0103845	10	10	all	0.860625	0.00998422	10	10	all	0.845567	0.00279919	10	10	all	0.645664	-0.0177701	10	10	all	0.730954	0.053714	10	10	all	0.739333	-0.014047	10	10	all	0.592582	0.0120717	10	10	all	0.616928	0.0619749	10	10	all	0.60295	-0.000622817	10	10
ADAM19	all	0.494441	-0.00710818	10	10	all	0.10313	-0.0152213	10	10	all	0.0967236	-0.0211977	10	10	all	0.657598	0.0107657	10	10	all	0.898569	-0.0452443	10	10	all	0.89925	-0.0174168	10	10	all	0.487225	0.00262463	10	10	all	0.570673	-0.0261523	10	10	all	0.50345	-0.0544882	10	10
ADAM2	all	0.2382	0.00570773	10	10	all	0.600498	0.000816591	10	10	all	0.233966	0.00300346	10	10	all	0.0650541	0.0919133	10	10	all	0.055871	0.0841112	10	10	all	0.0381935	0.0778657	10	10	all	0.030089	0.0863234	10	10	all	0.0494949	0.0740566	10	10	all	0.0234569	0.0730543	10	10
ADAM20	all	0.163905	-0.0197762	10	10	all	0.389455	-0.0125238	10	10	all	0.0906156	-0.0120915	10	10	all	0.0294522	0.103684	10	10	all	0.425856	0.0967158	10	10	all	0.0198327	0.0646188	10	10	all	0.0570581	0.0582885	10	10	all	0.581848	0.0193587	10	10	all	0.140362	0.0499482	10	10
ADAM21	ENST00000267499.3	0.033992	0.0193637	9	9	ENST00000603540.1	0.200762	0.0159131	10	10	ENST00000267499.3	0.0894479	0.00955295	9	9	ENST00000267499.3	0.661406	-0.167169	9	9	ENST00000603540.1	0.203039	-0.0648994	10	10	ENST00000603540.1	0.388231	-0.0392174	10	10	ENST00000603540.1	0.596533	0.0132604	10	10	ENST00000267499.3	0.405689	-0.066175	9	9	ENST00000603540.1	0.53496	-0.031861	10	10
ADAM22	all	0.168587	-0.0108546	5	5	ENST00000398201.4,ENST00000265727.7,ENST00000315984.7,ENST00000398209.3	0.0670817	0.010433	5	5	all	0.0448783	-0.00777837	5	5	ENST00000398204.4,ENST00000398201.4	0.233558	0.0630607	1	1	all	0.206931	0.0793408	5	5	ENST00000398204.4,ENST00000398201.4	0.200383	0.062112	1	1	all	0.118481	-0.0605002	5	5	all	0.268699	0.0284121	5	5	ENST00000398204.4,ENST00000398201.4	0.246897	0.0428045	1	1
ADAM23	ENST00000374415.3	0.787764	-0.00880286	10	10	ENST00000264377.3	0.231013	0.0177373	10	10	ENST00000264377.3	0.283855	0.00468021	10	10	ENST00000264377.3	0.260322	0.0126774	10	10	ENST00000374415.3	0.565561	0.0349596	10	10	ENST00000264377.3	0.416269	-0.0138935	10	10	ENST00000264377.3	0.327204	0.0235458	10	10	ENST00000264377.3	0.245711	0.0294643	10	10	ENST00000264377.3	0.268255	0.0330303	10	10
ADAM28	all	0.947577	-0.00190459	10	10	all	0.734006	-0.00823874	10	10	all	0.841762	-0.000301397	10	10	all	0.291645	0.0786466	10	10	all	0.54641	0.0362013	10	10	all	0.317684	0.0539697	10	10	all	0.264033	0.0610132	10	10	all	0.80926	0.0635837	10	10	all	0.427585	0.0453373	10	10
ADAM29	all	0.469593	0.00518845	10	10	all	0.348099	0.0125278	10	10	all	0.215996	0.00692465	10	10	all	0.00336273	0.158941	10	10	all	0.491812	0.0571814	10	10	all	0.00968427	0.0839287	10	10	all	0.000552593	0.133392	10	10	all	0.187533	0.0659357	10	10	all	0.00188555	0.0828003	10	10
ADAM30	all	0.284989	0.0122245	10	10	all	0.923356	0.00524954	10	10	all	0.421699	0.0145497	10	10	all	0.657271	-0.0167121	10	10	all	0.769709	0.0050673	10	10	all	0.621518	-0.00688666	10	10	all	0.424092	0.00337616	10	10	all	0.618519	0.000930612	10	10	all	0.440606	0.00215339	10	10
ADAM32	all	0.562483	-0.00943928	10	10	all	0.407889	0.0107373	10	10	all	0.954507	0.00485213	10	10	all	0.0928592	0.0962153	10	10	all	0.722214	-0.0109098	10	10	all	0.301198	0.00787002	10	10	all	0.176084	0.0809531	10	10	all	0.848867	-0.00450384	10	10	all	0.269577	0.00751699	10	10
ADAM33	all	0.0851113	-0.00464339	10	10	all	0.672614	-0.00311937	10	10	all	0.137274	-0.00358855	10	10	all	0.940025	-0.00591744	10	10	all	0.889003	-0.0268788	10	10	all	0.92825	-0.00478612	10	10	all	0.437641	-0.0300532	10	10	all	0.607894	-0.0169493	10	10	all	0.49305	-0.0282674	10	10
ADAM7	all	0.495905	0.00298832	10	10	all	0.405238	0.00714079	10	10	all	0.899533	0.00226452	10	10	all	0.90815	0.0260253	10	10	all	0.534481	0.0352231	10	10	all	0.908216	0.042377	10	10	all	0.844648	-0.0200718	10	10	all	0.347477	0.0690757	10	10	all	0.749799	0.0275447	10	10
ADAM8	all	0.30592	0.0108221	10	10	all	0.828482	-0.012173	10	10	all	0.290925	0.00191382	10	10	all	0.388757	0.00686079	10	10	all	0.629117	0.113872	10	10	all	0.498645	0.04255	10	10	all	0.275454	0.0349042	10	10	all	0.624661	0.0478675	10	10	all	0.367063	0.0383349	10	10
ADAM9	all	0.444306	0.0035481	10	10	all	0.82417	-0.00379882	10	10	all	0.70697	0.00124132	10	10	all	0.0953134	-0.010681	10	10	all	0.198088	0.0498207	10	10	all	0.934369	0.0245763	10	10	all	0.166711	-0.00991331	10	10	all	0.153971	0.0256613	10	10	all	0.982816	0.0217224	10	10
ADAMDEC1	all	0.770432	-0.000780628	10	10	all	0.339204	0.0112569	10	10	all	0.339005	0.00393249	10	10	all	0.1398	-0.191612	9	9	all	0.359564	-0.157494	10	10	all	0.199104	-0.125612	9	9	all	0.0463957	-0.215643	10	10	all	0.800527	0.0185577	9	9	all	0.283995	-0.0542763	9	9
ADAMTS1	all	0.721349	-0.0418062	10	10	all	0.27984	-0.0218916	9	9	all	0.484146	-0.0211667	9	9	all	0.452434	0.0461301	10	10	all	0.51066	0.0174885	10	10	all	0.418545	0.0497637	10	10	all	0.786851	0.00180629	10	10	all	0.962216	-0.0541399	10	10	all	0.719901	-0.0486336	10	10
ADAMTS10	ENST00000597188.1	0.597434	0.00868611	10	10	ENST00000597188.1	0.0983486	0.0178812	10	10	ENST00000597188.1	0.16319	0.0159655	10	10	ENST00000270328.4	0.701823	-0.0264442	10	10	ENST00000597188.1	0.415162	0.0566793	10	10	ENST00000270328.4	0.498932	-0.0415513	10	10	ENST00000597188.1	0.47213	0.0244501	10	10	ENST00000597188.1	0.162239	0.0904677	10	10	ENST00000597188.1	0.179985	0.0624264	10	10
ADAMTS12	all	0.824628	-0.0256684	10	10	all	0.383569	0.0220632	10	10	all	0.912524	-0.00107715	10	10	all	0.421245	0.0509571	9	9	all	0.610454	-0.0532114	10	10	all	0.636255	0.0404205	9	9	all	0.786938	-0.0234133	10	10	all	0.652771	0.0261336	9	9	all	0.377392	0.0274505	9	9
ADAMTS13	all	0.111157	0.0213008	1	1	ENST00000355699.2	0.23646	-0.00420707	9	9	all	0.12445	0.0132035	1	1	ENST00000371929.3	0.0196415	-0.0363556	8	8	ENST00000371929.3	0.0133463	-0.0826081	8	8	ENST00000371929.3	0.00734198	-0.0594818	8	8	ENST00000371929.3	0.0434294	-0.0809585	8	8	ENST00000371929.3	0.0127531	-0.125945	8	8	ENST00000371929.3	0.0103861	-0.100969	8	8
ADAMTS14	all	0.226062	-0.0161323	10	10	all	0.639352	-0.00264806	10	10	all	0.416945	-0.0013901	10	10	all	0.00611338	0.118262	10	10	all	0.880344	-0.00927971	10	10	all	0.080207	0.0757114	10	10	all	0.0133271	0.0310355	10	10	all	0.82092	0.0300643	10	10	all	0.08233	0.0241973	10	10
ADAMTS15	all	0.949104	-0.0037293	9	9	all	0.297812	-0.00607163	9	9	all	0.36211	-0.00199275	9	9	all	0.0144269	-0.0995937	9	9	all	0.146141	0.0721347	9	9	all	0.459089	-0.0205057	9	9	all	0.0122181	-0.0832022	9	9	all	0.219793	0.0389003	9	9	all	0.256861	-0.0143846	9	9
ADAMTS16	all	0.72228	0.00129395	10	10	all	0.896754	0.00328009	10	10	all	0.937134	0.00460297	10	10	all	0.836802	0.0732035	10	10	all	0.228773	0.0104772	10	10	all	0.485945	0.0654345	10	10	all	0.821419	0.0594585	10	10	all	0.159224	0.0178992	10	10	all	0.458705	0.0250222	10	10
ADAMTS17	all	0.793289	0.0106529	10	10	all	0.234396	-0.00453038	10	10	all	0.609311	-0.00325304	10	10	all	0.634948	-0.0303382	10	10	all	0.339219	0.0443608	10	10	all	0.735917	0.00031212	10	10	all	0.750384	-0.0488423	10	10	all	0.621388	0.0344372	10	10	all	0.957034	0.00481144	10	10
ADAMTS18	all	0.476701	-0.00268239	10	10	all	0.168336	0.0162309	10	10	all	0.131046	0.00542316	10	10	all	0.455945	-0.0392575	10	10	all	0.883556	-0.0225609	10	10	all	0.583047	-0.0283861	10	10	all	0.456885	-0.0801419	10	10	all	0.413721	0.0187644	10	10	all	0.850011	-0.0174513	10	10
ADAMTS19	all	0.734585	0.010735	10	10	all	0.408305	0.0164272	10	10	all	0.28472	0.005613	10	10	all	0.738407	-0.0481129	10	10	all	0.224043	0.0127281	10	10	all	0.274712	-0.0120606	10	10	all	0.679171	-0.0341363	10	10	all	0.169168	0.0324917	10	10	all	0.174791	0.00151718	10	10
ADAMTS2	all	0.147008	-0.0455534	10	10	all	0.268038	-0.0631656	10	10	all	0.128554	-0.0535018	10	10	all	0.677503	0.0548762	10	10	all	0.275108	0.0544605	10	10	all	0.345869	0.0451055	10	10	all	0.525229	-0.0410088	10	10	all	0.896539	-0.0574965	10	10	all	0.849391	-0.047304	10	10
ADAMTS20	all	0.0411131	-0.068429	10	10	all	0.0657908	-0.0653302	10	10	all	0.00811571	-0.0680857	10	10	all	0.866984	0.0636056	10	10	all	0.528474	0.0965034	10	10	all	0.560343	0.0745877	10	10	all	0.0502503	-0.0496892	10	10	all	0.0940924	-0.101496	10	10	all	0.0280248	-0.084712	10	10
ADAMTS3	all	0.165484	-0.0152729	10	10	all	0.803608	0.0152818	10	10	all	0.350028	0.00266902	10	10	all	0.776372	-0.0234678	10	10	all	0.719633	-0.03532	10	10	all	0.808903	-0.0376931	10	10	all	0.437341	-0.026464	10	10	all	0.718459	0.0229775	10	10	all	0.893549	-0.0216777	10	10
ADAMTS4	all	0.937912	0.00418623	10	10	all	0.154134	0.0149634	10	10	all	0.392528	0.00521708	10	10	all	0.499141	-0.000539026	10	10	all	0.302009	-0.0352627	10	10	all	0.347377	-0.0315406	10	10	all	0.375195	-0.0134729	10	10	all	0.727768	-0.0295187	10	10	all	0.478124	-0.0137713	10	10
ADAMTS5	all	0.726049	-0.0147869	10	10	all	0.526034	0.00108843	10	10	all	0.647017	-0.00832677	10	10	all	0.610058	0.0761786	10	10	all	0.871567	0.082308	10	10	all	0.830551	0.083639	10	10	all	0.510494	0.000335088	10	10	all	0.753827	0.0630007	10	10	all	0.762867	0.0526315	10	10
ADAMTS6	all	0.0229128	-0.0151501	10	10	all	0.676617	0.00549932	10	10	all	0.253816	-0.00467588	10	10	all	0.696967	0.0220778	10	10	all	0.401258	-0.0121934	10	10	all	0.523532	-0.029608	10	10	all	0.553637	-0.0127829	10	10	all	0.26831	-0.00701564	10	10	all	0.771329	0.000687438	10	10
ADAMTS7	all	0.396482	-0.00322544	10	10	all	0.68889	0.00616241	10	10	all	0.467827	0.00159701	10	10	all	0.374242	-0.0719304	10	10	all	0.621311	-0.0249187	10	10	all	0.45607	-0.0385442	10	10	all	0.349835	-0.0225272	10	10	all	0.75928	-0.0163411	10	10	all	0.459047	-0.0190092	10	10
ADAMTS8	all	0.538015	-0.00925731	10	10	all	0.761311	0.0048128	10	10	all	0.997338	-0.00283728	10	10	all	0.676924	0.0613803	10	10	all	0.275506	-0.00630536	10	10	all	0.536881	-0.00909401	10	10	all	0.538724	-0.00404523	10	10	all	0.381936	-0.00806629	10	10	all	0.51484	-0.0125754	10	10
ADAMTS9	all	0.0333541	0.0318202	10	10	all	0.328187	-0.00574873	10	10	all	0.286506	0.0165005	10	10	all	0.943129	0.0124817	10	10	all	0.617285	0.0371033	10	10	all	0.652705	-0.0127684	10	10	all	0.269653	0.0477748	10	10	all	0.920168	0.0223659	10	10	all	0.347809	0.0179095	10	10
ADAMTSL1	all	0.86166	-0.00675216	10	10	all	0.381813	0.00759822	10	10	all	0.685568	0.00417064	10	10	all	0.590206	0.0224429	10	10	all	0.242796	0.0239267	10	10	all	0.345927	0.0501222	10	10	all	0.69492	0.0482616	10	10	all	0.126356	0.0546677	10	10	all	0.267132	0.0452053	10	10
ADAMTSL3	all	0.250325	-0.0105967	10	10	all	0.113956	-0.0188563	10	10	all	0.515235	-0.0152137	10	10	all	0.552859	-0.0273725	10	10	all	0.960011	-0.0355238	10	10	all	0.985866	-0.000598193	10	10	all	0.621164	-0.0513513	10	10	all	0.885381	0.00199103	10	10	all	0.687096	-0.0373256	10	10
ADAMTSL4	ENST00000369038.2	0.693919	0.0193239	10	10	ENST00000271643.4	0.00103887	0.0211673	10	10	ENST00000271643.4	0.0384567	0.0154755	10	10	ENST00000271643.4	0.205699	0.0683163	10	10	ENST00000271643.4	0.646354	-0.0415564	10	10	ENST00000271643.4	0.679944	0.0419602	10	10	ENST00000271643.4	0.109277	0.0537555	10	10	ENST00000271643.4	0.387215	-0.0215328	10	10	ENST00000271643.4	0.242337	0.0405154	10	10
ADAMTSL5	all	0.529659	-0.0160383	10	10	all	0.248327	-0.00511887	10	10	all	0.206336	-0.0118319	10	10	all	0.148248	-0.09036	10	10	all	0.139886	-0.14513	10	10	all	0.130677	-0.140983	10	10	all	0.141239	-0.103554	10	10	all	0.0479961	-0.111673	10	10	all	0.0614592	-0.119792	10	10
ADAP1	all	0.0590778	-0.0238902	10	10	all	0.150526	0.0105853	10	10	all	0.953246	-0.00731441	10	10	all	0.109146	0.192152	10	10	all	0.469376	0.0931518	10	10	all	0.219108	0.16202	10	10	all	0.193742	0.0891642	10	10	all	0.194081	0.120117	10	10	all	0.178704	0.124472	10	10
ADAP2	all	0.0217466	-0.0320882	7	7	ENST00000580525.1	0.0245085	-0.0546982	2	2	ENST00000330889.3	0.0909568	0.0080407	2	2	all	0.0502838	0.154656	7	7	all	0.409483	-0.0503864	7	7	ENST00000330889.3	0.298888	-0.0458592	2	2	ENST00000330889.3	0.210073	-0.0505861	2	2	ENST00000580525.1	0.0375335	-0.0926708	2	2	ENST00000580525.1	0.13719	-0.0768208	2	2
ADAR	ENST00000292205.5	0.350713	0.00604453	5	5	ENST00000292205.5	0.65099	-0.00387214	5	5	ENST00000292205.5	0.773956	0.000673374	5	5	ENST00000368474.4	0.241113	-0.0559327	10	10	ENST00000368474.4	0.215588	-0.0212819	10	10	ENST00000368474.4	0.15877	-0.0212454	10	10	ENST00000368474.4	0.319511	-0.0471606	10	10	ENST00000368474.4	0.100681	-0.00992426	10	10	ENST00000368474.4	0.126083	-0.0130813	10	10
ADARB1	all	0.0210344	-0.0811316	10	10	all	0.0744185	-0.0894839	10	10	all	0.0066603	-0.0832416	10	10	all	0.114522	0.285648	10	10	all	0.0153192	0.282887	10	10	all	0.0246052	0.274626	10	10	all	0.369474	0.102452	10	10	all	0.0383359	0.0853937	10	10	all	0.107642	0.0903937	10	10
ADARB2	all	0.221938	-0.0175564	9	9	all	0.0300165	0.0235552	9	9	all	0.455295	0.0144307	9	9	all	0.758255	0.051848	9	9	all	0.320111	-0.143989	9	9	all	0.896375	-0.0551517	9	9	all	0.779218	0.0115265	9	9	all	0.644936	-0.07669	9	9	all	0.57649	-0.054017	9	9
ADAT1	all	0.598454	-0.0119526	10	10	all	0.455405	-0.0074591	10	10	all	0.407598	-0.00914348	10	10	all	0.938316	0.0277994	10	10	all	0.69998	-0.0255049	10	10	all	0.952026	0.0281026	10	10	all	0.734117	-0.0202509	10	10	all	0.913178	-0.0336533	10	10	all	0.798619	-0.0152478	10	10
ADAT2	all	0.00665983	-0.13691	10	10	all	0.0161776	-0.110705	10	10	all	0.00309005	-0.123808	10	10	all	0.0498798	0.215479	10	10	all	0.172761	0.141626	10	10	all	0.0550924	0.107098	10	10	all	0.312965	-0.0993496	10	10	all	0.114856	-0.0594592	10	10	all	0.184956	-0.101603	10	10
ADAT3	all	0.669351	0.00734583	10	10	all	0.477706	0.0135007	10	10	all	0.71683	0.0115123	10	10	all	0.069744	-0.0375621	10	10	all	0.399611	-0.0233015	10	10	all	0.0876678	-0.0168195	10	10	all	0.116496	-0.026108	10	10	all	0.585764	-0.000494955	10	10	all	0.275058	-0.0188349	10	10
ADC	all	0.500205	0.00262346	10	10	all	0.345118	-0.00392939	10	10	all	0.833899	0.00125218	10	10	all	0.59568	-0.026437	10	10	all	0.950464	-0.0454529	10	10	all	0.720782	-0.0378113	10	10	all	0.449876	0.0121064	10	10	all	0.625741	-0.0637401	10	10	all	0.879797	-0.0234286	10	10
ADCK1	all	0.335187	0.0221313	10	10	all	0.305417	-0.0122661	10	10	all	0.943162	0.00653998	10	10	all	0.719971	0.0386713	10	10	all	0.19474	0.0342463	10	10	all	0.303214	0.0377081	10	10	all	0.211633	0.0295933	10	10	all	0.397558	0.0506688	10	10	all	0.226981	0.0539337	10	10
ADCK2	all	0.667912	0.00593643	10	10	all	0.458823	0.0151809	10	10	all	0.678185	0.00385154	10	10	all	0.288912	0.0598629	10	10	all	0.510297	0.0347054	10	10	all	0.339593	0.0674028	10	10	all	0.308087	0.0199724	10	10	all	0.245459	0.0260799	10	10	all	0.188275	0.0178723	10	10
ADCK3	ENST00000366779.1	0.134641	-0.00520246	10	10	ENST00000366779.1	0.52969	-0.01171	10	10	ENST00000366779.1	0.142032	-0.00683946	10	10	ENST00000366777.3	0.221383	-0.0374701	10	10	ENST00000366777.3	0.332267	-0.0156935	10	10	ENST00000366777.3	0.2186	-0.0289516	10	10	ENST00000366777.3	0.334649	-0.0110195	10	10	ENST00000366779.1	0.28874	-0.0623196	10	10	ENST00000366777.3	0.305841	-0.042197	10	10
ADCK4	ENST00000243583.6	0.0798631	-0.0340756	10	10	ENST00000243583.6	0.17097	-0.0113617	10	10	ENST00000243583.6	0.0487874	-0.0185282	10	10	ENST00000324464.3,ENST00000450541.1	0.385715	-0.0508135	10	10	ENST00000243583.6	0.271519	0.00484498	10	10	ENST00000243583.6	0.513414	-0.0377691	10	10	ENST00000243583.6	0.276002	-0.0958507	10	10	ENST00000324464.3,ENST00000450541.1	0.58658	-0.0347433	10	10	ENST00000324464.3,ENST00000450541.1	0.486795	-0.0411137	10	10
ADCK5	all	0.582312	-0.0100764	10	10	all	0.513722	-0.00155266	10	10	all	0.276953	-0.00319925	10	10	all	0.103204	-0.0445481	10	10	all	0.106693	-0.0321374	10	10	all	0.0863937	-0.0345278	10	10	all	0.0870535	-0.105154	10	10	all	0.152186	-0.0339629	10	10	all	0.100987	-0.0424169	10	10
ADCY1	all	0.369805	-0.0209346	10	10	all	0.695391	-0.000122304	10	10	all	0.437883	-0.013239	10	10	all	0.398789	0.0781346	10	10	all	0.566632	-0.0166884	10	10	all	0.728677	0.0151311	10	10	all	0.724862	0.00469734	10	10	all	0.456934	-0.0194457	10	10	all	0.925008	-0.0369265	10	10
ADCY10	all	0.799262	0.00411136	10	10	all	0.874138	-0.0012382	10	10	all	0.935336	0.00928363	10	10	all	0.375246	-0.0237611	10	10	all	0.904656	0.0384903	10	10	all	0.634206	0.0314873	10	10	all	0.346641	0.0255998	10	10	all	0.863669	0.0318471	10	10	all	0.571501	0.0613765	10	10
ADCY2	all	0.665324	-0.00208702	10	10	all	0.935793	-0.0170166	10	10	all	0.539542	-0.0108111	10	10	all	0.828994	0.0917105	10	10	all	0.317161	0.035937	10	10	all	0.431819	0.0279273	10	10	all	0.562483	0.0291983	10	10	all	0.579064	-0.00178047	10	10	all	0.453238	0.0496978	10	10
ADCY3	all	0.265	-0.0395746	10	10	all	0.924388	-0.0586183	10	10	all	0.380253	-0.039295	10	10	all	0.0317778	-0.0892979	10	10	all	0.586505	-0.022448	10	10	all	0.100459	-0.0840998	10	10	all	0.0206722	-0.195053	10	10	all	0.222485	-0.0898517	10	10	all	0.0679232	-0.159003	10	10
ADCY4	ENST00000418030.2	0.0994926	-0.0267461	9	9	ENST00000418030.2	0.220743	-0.0320258	9	9	ENST00000418030.2	0.09777	-0.0279707	9	9	ENST00000310677.4,ENST00000554068.2	0.286813	-0.0979281	9	9	ENST00000418030.2	0.0247002	-0.132612	9	9	ENST00000418030.2	0.0464957	-0.0908605	9	9	ENST00000418030.2	0.0507534	-0.0439976	9	9	ENST00000418030.2	0.0042464	-0.137739	9	9	ENST00000418030.2	0.00617014	-0.105448	9	9
ADCY5	all	0.665899	-0.0298584	10	10	all	0.943119	-0.0181442	10	10	all	0.713876	-0.0179568	10	10	all	0.235465	0.199658	10	10	all	0.905059	0.268224	10	10	all	0.358761	0.264406	10	10	all	0.140309	0.140763	10	10	all	0.993963	0.186307	10	10	all	0.356351	0.15082	10	10
ADCY6	all	0.065347	-0.0285621	10	10	all	0.363429	-0.040535	10	10	all	0.147611	-0.0331444	10	10	all	0.0813097	-0.086953	10	10	all	0.123016	-0.16632	10	10	all	0.0782521	-0.14385	10	10	all	0.0198052	-0.142162	10	10	all	0.0697476	-0.175661	10	10	all	0.0206511	-0.158911	10	10
ADCY7	ENST00000394697.2	0.781599	0.00167153	10	10	ENST00000254235.3	0.693806	0.00311122	10	10	ENST00000254235.3	0.869003	0.000291774	10	10	ENST00000394697.2	0.0725051	0.121697	10	10	ENST00000394697.2	0.604367	0.0333892	10	10	ENST00000394697.2	0.227324	0.0454499	10	10	ENST00000394697.2	0.0959015	0.117647	10	10	ENST00000394697.2	0.492445	0.025594	10	10	ENST00000394697.2	0.232197	0.0868062	10	10
ADCY8	all	0.93872	-0.0178066	10	10	all	0.704346	-0.0123375	10	10	all	0.853099	-0.0103288	10	10	all	0.314053	0.016898	10	10	all	0.84985	0.0104551	10	10	all	0.484671	0.0128271	10	10	all	0.214727	-0.0036765	10	10	all	0.72167	-0.0171245	10	10	all	0.320982	-0.0142568	10	10
ADCY9	all	0.838639	-0.00396205	10	10	all	0.734942	-0.00839419	10	10	all	0.767244	-0.00230554	10	10	all	0.0303876	0.0957298	10	10	all	0.025452	-0.104073	10	10	all	0.976025	0.0029483	10	10	all	0.0356094	0.0898101	10	10	all	0.0346758	-0.101478	10	10	all	0.988408	0.00661954	10	10
ADCYAP1	ENST00000579794.1	0.365529	-0.00592923	3	3	ENST00000450565.3	0.522634	-0.00460421	3	3	all	0.698701	0.00712422	7	7	ENST00000450565.3	0.399823	-0.0259674	3	3	ENST00000579794.1	0.446907	-0.0238294	3	3	ENST00000450565.3	0.374625	-0.0204964	3	3	all	0.656523	0.0292291	7	7	ENST00000450565.3	0.432583	-0.0198179	3	3	ENST00000450565.3	0.481705	-0.0178198	3	3
ADD1	ENST00000446856.1	0.142957	-0.0230989	10	10	ENST00000398129.1	0.344396	-0.00807789	10	10	ENST00000446856.1	0.229684	-0.0204757	10	10	ENST00000446856.1	0.0519185	0.14552	10	10	ENST00000446856.1	0.558774	0.130015	10	10	ENST00000446856.1	0.102016	0.0501236	10	10	ENST00000446856.1	0.060907	0.0157803	10	10	ENST00000446856.1	0.518757	0.00766672	10	10	ENST00000446856.1	0.0904551	-0.00653844	10	10
ADD2	ENST00000264436.4,ENST00000413157.2,ENST00000430656.1	0.188659	0.00437153	10	10	ENST00000264436.4,ENST00000413157.2,ENST00000430656.1	0.0766765	0.0224002	10	10	ENST00000264436.4,ENST00000413157.2,ENST00000430656.1	0.0415434	0.0149111	10	10	ENST00000407644.2	0.186457	0.0500489	7	7	ENST00000407644.2	0.320976	0.0309562	7	7	ENST00000407644.2	0.181981	0.0560232	7	7	ENST00000264436.4,ENST00000413157.2,ENST00000430656.1	0.119431	0.102176	10	10	ENST00000264436.4,ENST00000413157.2,ENST00000430656.1	0.148217	0.120116	10	10	ENST00000264436.4,ENST00000413157.2,ENST00000430656.1	0.106804	0.111139	10	10
ADD3	ENST00000356080.4,ENST00000277900.8	0.00872715	0.00776337	10	10	ENST00000356080.4,ENST00000277900.8	0.51045	-0.00303954	10	10	ENST00000356080.4,ENST00000277900.8	0.0349671	0.00545427	10	10	ENST00000360162.3	0.272225	-0.0856453	8	8	ENST00000360162.3	0.0900517	-0.187302	8	8	ENST00000360162.3	0.156741	-0.152551	8	8	ENST00000356080.4,ENST00000277900.8	0.0448793	0.0616	10	10	ENST00000360162.3	0.07746	-0.158337	8	8	ENST00000356080.4,ENST00000277900.8	0.0563695	0.0270687	10	10
ADH1A	all	0.400142	0.00239775	10	10	all	0.412674	-0.0058984	10	10	all	0.95793	-0.00385003	10	10	all	0.63382	0.037256	10	10	all	0.751539	-0.0354928	10	10	all	0.706429	0.0229983	10	10	all	0.460996	0.0321365	10	10	all	0.999549	-0.029147	10	10	all	0.808415	0.0239683	10	10
ADH1B	all	0.676643	-0.00464167	8	8	all	0.257495	0.013305	8	8	all	0.579759	0.00333215	8	8	all	0.833641	0.044879	8	8	all	0.820887	0.00231271	8	8	all	0.710987	0.0183377	8	8	all	0.985739	0.0395385	8	8	all	0.454222	0.00998409	8	8	all	0.638817	0.0218887	8	8
ADH1C	all	0.0873667	-0.0134371	10	10	all	0.0805245	0.0193131	10	10	all	0.824731	0.00370309	10	10	all	0.0871592	0.101634	10	10	all	0.525078	0.0391776	10	10	all	0.270851	0.0430221	10	10	all	0.204048	0.0316554	10	10	all	0.193152	0.0359672	10	10	all	0.205774	0.0372252	10	10
ADH4	all	0.772722	-0.00804459	10	10	all	0.864488	-0.00794949	10	10	all	0.63512	-0.00704424	10	10	all	0.894633	0.0200571	10	10	all	0.880211	0.0856912	10	10	all	0.83373	0.0172602	10	10	all	0.814002	0.00028993	10	10	all	0.855066	0.0234423	10	10	all	0.918723	0.0023767	10	10
ADH5	all	0.109979	-0.0143984	10	10	all	0.596299	-0.00782288	10	10	all	0.136886	-0.0109221	10	10	all	0.21496	-0.0754151	10	10	all	0.836802	0.0603817	10	10	all	0.448851	0.0377657	10	10	all	0.0470005	-0.0591216	10	10	all	0.690789	0.0613112	10	10	all	0.177283	0.0300152	10	10
ADH6	all	0.971837	0.00571474	10	10	all	0.442478	-0.00555479	10	10	all	0.745405	-0.00420579	10	10	all	0.446977	0.0477933	10	10	all	0.195617	-0.0728045	10	10	all	0.810658	-0.0155773	10	10	all	0.359348	0.0376696	10	10	all	0.178293	-0.0753213	10	10	all	0.819296	-0.0204353	10	10
ADH7	all	0.610118	0.0161249	10	10	all	0.129697	-0.025479	10	10	all	0.916112	-0.00855563	10	10	all	0.972538	-0.0373988	10	10	all	0.385777	0.00846609	10	10	all	0.854015	0.026382	10	10	all	0.751284	0.031698	10	10	all	0.837911	-0.0476031	10	10	all	0.884794	0.0145374	10	10
ADHFE1	all	0.126059	-0.0027733	10	10	all	0.481744	0.00604417	10	10	all	0.493077	-0.00166001	10	10	all	0.698222	-0.0338328	10	10	all	0.861295	0.0667004	10	10	all	0.755884	0.00312476	10	10	all	0.303419	-0.0292976	10	10	all	0.712726	0.0620299	10	10	all	0.576277	0.0024596	10	10
ADI1	all	0.369926	-0.00908153	10	10	all	0.666154	-0.00662716	10	10	all	0.365155	-0.00639973	10	10	all	0.457621	-0.0217423	10	10	all	0.789659	0.00942506	10	10	all	0.738991	0.011625	10	10	all	0.704543	-0.0298353	10	10	all	0.759796	0.0192467	10	10	all	0.925277	0.0121507	10	10
ADIPOQ	all	0.410727	-0.0140887	10	10	all	0.219265	0.00622067	10	10	all	0.970639	-0.00198636	10	10	all	0.407823	-0.0625175	10	10	all	0.629358	0.0132362	10	10	all	0.492273	-0.0206656	10	10	all	0.451436	-0.0738705	10	10	all	0.962441	0.0136231	10	10	all	0.506267	-0.021155	10	10
ADIPOR1	all	0.476246	-0.0220654	10	10	all	0.760235	-0.018248	10	10	all	0.677027	-0.0221639	10	10	all	0.0908981	-0.104553	10	10	all	0.619595	-0.0884855	10	10	all	0.158602	-0.0682734	10	10	all	0.0696498	-0.132257	10	10	all	0.765003	-0.118567	10	10	all	0.252597	-0.131377	10	10
ADIPOR2	all	0.225413	-0.00435019	10	10	all	0.693138	0.00902253	10	10	all	0.515162	0.00632985	10	10	all	0.0487046	-0.0859492	10	10	all	0.37732	-0.0243247	10	10	all	0.114125	-0.0677393	10	10	all	0.0437578	-0.0589065	10	10	all	0.691122	0.00140617	10	10	all	0.176305	-0.0558232	10	10
ADIRF	all	0.404776	-0.0160734	10	10	all	0.293109	-0.0172015	10	10	all	0.206458	-0.0135337	10	10	all	0.208017	0.0337987	10	10	all	0.415874	0.0171175	10	10	all	0.794988	0.0274187	10	10	all	0.598925	-0.00578835	10	10	all	0.248038	0.00839457	10	10	all	0.622074	0.0199225	10	10
ADK	ENST00000372734.3	0.756175	-0.00329266	10	10	ENST00000286621.2	0.3912	-0.0121816	10	10	ENST00000372734.3	0.56357	-0.00911917	10	10	ENST00000286621.2	0.236292	0.0864413	10	10	ENST00000286621.2	0.385654	-0.0201126	10	10	ENST00000372734.3	0.459636	0.00319145	10	10	ENST00000286621.2	0.387794	0.0929247	10	10	ENST00000286621.2	0.236198	-0.0469381	10	10	ENST00000372734.3	0.517763	-0.00744521	10	10
ADM	ENST00000278175.5	0.493906	0.00340151	10	10	ENST00000528655.1,ENST00000525063.1	0.0856539	-0.0185368	10	10	ENST00000528655.1,ENST00000525063.1	0.0723563	-0.00641811	10	10	ENST00000528655.1,ENST00000525063.1	0.00656312	-0.110695	10	10	ENST00000528655.1,ENST00000525063.1	0.0764753	-0.143131	10	10	ENST00000528655.1,ENST00000525063.1	0.00768053	-0.114651	10	10	ENST00000528655.1,ENST00000525063.1	0.00402872	-0.107029	10	10	ENST00000528655.1,ENST00000525063.1	0.0182861	-0.127787	10	10	ENST00000528655.1,ENST00000525063.1	0.00206223	-0.109887	10	10
ADM2	all	0.89118	-0.00765454	10	10	all	0.764153	-0.020631	10	10	all	0.774854	-0.0218541	10	10	all	0.734912	-0.0312137	10	10	all	0.730274	0.0464504	10	10	all	0.851529	0.0081504	10	10	all	0.626879	-0.0479348	10	10	all	0.963791	0.0103065	10	10	all	0.904378	-0.0395493	10	10
ADM5	all	0.516975	-0.00372714	10	10	all	0.940062	-0.00236617	10	10	all	0.699837	-0.00826605	10	10	all	0.750596	0.0268417	10	10	all	0.347568	-0.0391794	10	10	all	0.85819	0.000198467	10	10	all	0.786069	0.0128765	10	10	all	0.297162	-0.0239946	10	10	all	0.817187	-0.0324809	10	10
ADNP	ENST00000396029.3	0.0213835	-0.0267971	2	2	ENST00000396029.3,ENST00000396032.3	0.0249296	-0.0243023	8	8	ENST00000396029.3	0.021263	-0.0251916	2	2	ENST00000396029.3	0.118126	-0.0661511	2	2	ENST00000396029.3,ENST00000396032.3	0.0632039	0.128518	8	8	ENST00000396029.3,ENST00000396032.3	0.0636964	0.104462	8	8	ENST00000396029.3	0.0237774	-0.104948	2	2	ENST00000396029.3	0.0618722	-0.0598698	2	2	ENST00000396029.3	0.0261908	-0.0824091	2	2
ADNP2	all	0.366199	-0.0131964	10	10	all	0.344915	-0.0106241	10	10	all	0.175286	-0.0169842	10	10	all	1.24072e-05	-0.211586	10	10	all	0.000106397	-0.226556	10	10	all	1.34698e-06	-0.210432	10	10	all	2.57478e-06	-0.182956	10	10	all	0.000135871	-0.197486	10	10	all	1.88623e-06	-0.174989	10	10
ADO	all	0.46824	-0.0868752	10	10	all	0.673933	-0.0248305	10	10	all	0.285229	-0.0596691	10	10	all	0.269726	0.0543996	9	9	all	0.131878	0.121584	10	10	all	0.233734	0.0796611	9	9	all	0.986074	-0.00939376	10	10	all	0.35792	0.0766629	10	10	all	0.699197	0.0364115	10	10
ADORA1	ENST00000337894.4	0.348468	-0.00437845	10	10	ENST00000337894.4	0.123261	0.00719925	10	10	ENST00000309502.3	0.390224	0.00346741	8	8	ENST00000309502.3	0.556316	0.0207213	8	8	ENST00000337894.4	0.45257	-0.0431695	10	10	ENST00000309502.3	0.622604	0.0179137	8	8	ENST00000309502.3	0.321661	0.0203527	8	8	ENST00000337894.4	0.76186	-0.0244267	10	10	ENST00000309502.3	0.426599	0.0336826	8	8
ADORA2A	all	0.692043	0.00338924	10	10	all	0.870267	-0.000870586	10	10	all	0.68399	-0.00142834	10	10	all	0.234329	0.0559797	10	10	all	0.705347	-0.0304318	10	10	all	0.757261	0.0251398	10	10	all	0.181542	0.062582	10	10	all	0.656492	-0.0186955	10	10	all	0.612122	0.0208424	10	10
ADORA2B	all	0.64165	0.00342949	10	10	all	0.508854	0.00525199	10	10	all	0.806994	0.0046326	10	10	all	0.748753	-0.0155687	10	10	all	0.12534	-0.0582932	10	10	all	0.256349	-0.0197685	10	10	all	0.914128	-0.00990047	10	10	all	0.118234	-0.0548506	10	10	all	0.278103	-0.0182065	10	10
ADORA3	all	0.997431	-0.020868	10	10	all	0.633547	0.00659959	10	10	all	0.921587	-0.0122739	10	10	all	0.993596	0.0283461	10	10	all	0.59568	-0.0318228	10	10	all	0.737881	0.0168164	10	10	all	0.957249	-0.042715	10	10	all	0.493407	-0.0181765	10	10	all	0.917108	0.0130204	10	10
ADPRH	ENST00000478399.1,ENST00000478927.1	0.157377	0.0154482	1	1	ENST00000478927.1,ENST00000357003.3	0.0120552	-0.0386113	10	10	ENST00000478927.1,ENST00000357003.3	0.208537	-0.0302643	10	10	ENST00000478927.1,ENST00000357003.3	0.104164	-0.117045	10	10	ENST00000478399.1,ENST00000478927.1	0.158392	-0.084787	1	1	ENST00000478927.1,ENST00000357003.3	0.126578	0.0591256	10	10	ENST00000478927.1,ENST00000357003.3	0.0386211	-0.0923972	10	10	ENST00000478399.1,ENST00000478927.1	0.163836	-0.0660458	1	1	ENST00000478927.1,ENST00000357003.3	0.0322034	-0.0202648	10	10
ADPRHL1	all	0.835109	0.00859292	10	10	all	0.165889	-0.0145493	10	10	all	0.374509	-0.00211442	10	10	all	0.367052	0.0350944	10	10	all	0.407791	0.0374316	10	10	all	0.370739	0.0384732	10	10	all	0.225456	0.025036	10	10	all	0.614148	-0.0183339	10	10	all	0.412272	0.0183751	10	10
ADPRHL2	all	0.92489	-0.00261077	10	10	all	0.519749	-0.00757181	10	10	all	0.969467	-0.00710463	10	10	all	0.392814	-0.0472141	10	10	all	0.236829	0.0565108	10	10	all	0.304545	0.0344341	10	10	all	0.433849	-0.0310391	10	10	all	0.43311	0.0405264	10	10	all	0.367784	0.0296195	10	10
ADPRM	all	0.00164678	-0.137302	10	10	all	9.58959e-05	-0.137595	10	10	all	0.000206395	-0.137449	10	10	all	0.0390404	0.21745	10	10	all	0.0593813	0.216947	10	10	all	0.0406173	0.214367	10	10	all	0.00337344	-0.080324	10	10	all	0.00172442	-0.0890056	10	10	all	0.000851747	-0.0812399	10	10
ADRA1A	ENST00000276393.4	0.349835	-0.00705856	10	10	ENST00000276393.4	0.473408	0.0103811	10	10	ENST00000380573.3	0.873456	-0.0034507	10	10	ENST00000380573.3	0.0366086	0.0815455	10	10	ENST00000276393.4	0.335348	0.0500176	10	10	ENST00000380573.3	0.174913	0.0601266	10	10	ENST00000380573.3	0.0384515	0.0698142	10	10	ENST00000276393.4	0.150833	0.0362007	10	10	ENST00000380573.3	0.234147	0.0211951	10	10
ADRA1B	all	0.402391	0.00238558	10	10	all	0.495075	-0.0078128	10	10	all	0.851592	-0.00211542	10	10	all	0.319491	0.030029	10	10	all	0.229364	0.0735305	10	10	all	0.199449	0.0585146	10	10	all	0.186465	0.0512777	10	10	all	0.456047	0.0398367	10	10	all	0.254148	0.0535425	10	10
ADRA1D	all	0.406531	-0.0119117	10	10	all	0.138906	-0.0206447	10	10	all	0.878982	-0.0198354	10	10	all	0.686669	0.00940037	10	10	all	0.236896	-0.0376456	10	10	all	0.660806	0.00356482	10	10	all	0.771858	0.0176479	10	10	all	0.0307985	-0.0595509	10	10	all	0.263252	-0.0366538	10	10
ADRA2A	all	0.909873	-0.00430491	10	10	all	0.530246	-0.00594728	10	10	all	0.634072	-0.00315653	10	10	all	0.298317	-0.0688994	10	10	all	0.0163451	-0.0936332	10	10	all	0.0360943	-0.0537848	10	10	all	0.353925	-0.0593288	10	10	all	0.0106664	-0.0803287	10	10	all	0.0327258	-0.0451648	10	10
ADRA2B	all	0.609327	-0.0206124	10	10	all	0.668866	-0.014915	10	10	all	0.687148	-0.021901	10	10	all	0.484505	0.0327559	10	10	all	0.548028	-0.0189889	10	10	all	0.506001	0.0300953	10	10	all	0.849071	-0.0186309	10	10	all	0.858612	-0.0221558	10	10	all	0.966676	-0.0142946	10	10
ADRA2C	all	0.59916	-0.00656424	10	10	all	0.758558	-0.00261081	10	10	all	0.572308	-0.00361043	10	10	all	0.569238	0.0520154	10	10	all	0.928159	-0.0234651	10	10	all	0.687009	0.0331802	10	10	all	0.490915	0.0272042	10	10	all	0.957852	-0.0234584	10	10	all	0.604764	0.0158334	10	10
ADRB1	all	0.17325	0.0139138	10	10	all	0.551329	-0.00258128	10	10	all	0.613355	0.00471027	10	10	all	0.853439	0.021257	10	10	all	0.602712	-0.0197409	10	10	all	0.673982	0.0181063	10	10	all	0.493906	0.034089	10	10	all	0.813025	0.0187705	10	10	all	0.591339	0.0486349	10	10
ADRB2	all	0.948431	0.00356637	10	10	all	0.441304	0.00575453	10	10	all	0.456467	0.00194922	10	10	all	0.463081	-0.0251802	10	10	all	0.102989	-0.0274457	10	10	all	0.167581	-0.0593149	10	10	all	0.617698	-0.0405611	10	10	all	0.231694	-0.0295778	10	10	all	0.409377	-0.0636112	10	10
ADRB3	all	0.400648	0.00619202	10	10	all	0.233597	-0.00996916	10	10	all	0.761292	0.000260038	10	10	all	0.438111	0.02812	10	10	all	0.783485	-0.0286726	10	10	all	0.738906	0.0127129	10	10	all	0.253881	0.0629925	10	10	all	0.474193	-0.0572587	10	10	all	0.810606	0.0177065	10	10
ADRBK1	all	0.767885	0.00800713	10	10	all	0.621766	-0.00673024	10	10	all	0.803581	0.0038187	10	10	all	0.270559	0.0381534	10	10	all	0.677586	-0.0228396	10	10	all	0.887256	0.0391521	10	10	all	0.258446	0.0838793	10	10	all	0.510849	-0.0215636	10	10	all	0.95244	0.0702266	10	10
ADRBK2	all	0.938541	0.00933482	10	10	all	0.0321824	0.0150805	10	10	all	0.112104	0.0117957	10	10	all	0.565676	0.0774869	10	10	all	0.287065	-0.0607332	10	10	all	0.736259	-0.0202435	10	10	all	0.358076	0.0252759	10	10	all	0.762678	-0.0348212	10	10	all	0.861458	-0.00754187	10	10
ADRM1	all	0.371254	-0.00351804	10	10	all	0.0733871	-0.00633553	10	10	all	0.10596	-0.00416015	10	10	all	0.535039	0.080032	10	10	all	0.817908	0.0171473	10	10	all	0.653195	0.0547994	10	10	all	0.717673	0.0659401	10	10	all	0.448473	0.0279375	10	10	all	0.883901	0.0777059	10	10
ADSL	all	0.0088117	-0.149439	9	9	all	0.00402936	-0.128	9	9	all	0.00274887	-0.138719	9	9	all	0.720013	-0.0234025	8	8	all	0.599271	0.0705183	9	9	all	0.390712	-0.039229	8	8	all	0.00229595	-0.262753	9	9	all	0.00143179	-0.209843	9	9	all	0.000624288	-0.217452	9	9
ADSS	all	0.0508702	-0.10644	10	10	all	0.124434	-0.124578	10	10	all	0.102014	-0.115509	10	10	all	0.870365	0.0146058	10	10	all	0.636117	0.000632135	10	10	all	0.782702	0.0216167	10	10	all	0.0924589	-0.148786	10	10	all	0.223493	-0.201093	10	10	all	0.137974	-0.174939	10	10
ADSSL1	all	0.37313	0.00418835	10	10	all	0.977511	0.00101685	10	10	all	0.497582	0.00173766	10	10	all	0.959335	0.010558	10	10	all	0.991837	0.0253334	10	10	all	0.953017	0.0202003	10	10	all	0.683603	0.0105191	10	10	all	0.954568	0.0151332	10	10	all	0.772453	0.0087675	10	10
ADTRP	all	0.736479	0.00645958	8	8	all	0.222055	0.00753148	8	8	all	0.22528	0.00802421	8	8	all	0.814012	0.120026	8	8	all	0.935066	0.0330449	8	8	all	0.47779	0.0360217	8	8	all	0.412785	0.0571049	8	8	all	0.510465	0.0258081	8	8	all	0.280373	0.0626177	8	8
AEBP1	all	0.853012	0.00653573	10	10	all	0.160182	-0.0187093	10	10	all	0.547494	-0.00776738	10	10	all	0.574234	-0.0040777	10	10	all	0.884181	0.0468944	10	10	all	0.626082	-0.0242885	10	10	all	0.705592	-0.0515491	10	10	all	0.800521	-0.0416378	10	10	all	0.764333	-0.0438462	10	10
AEBP2	all	7.79494e-05	-0.0282878	10	10	all	0.000998231	-0.0469683	10	10	all	3.34742e-05	-0.0354773	10	10	all	0.000527858	0.340676	10	10	all	0.00209442	0.388846	10	10	all	0.000325498	0.364761	10	10	all	0.0195205	0.236723	10	10	all	0.0907251	0.234463	10	10	all	0.0213173	0.235593	10	10
AEN	all	0.249907	-0.0241061	10	10	all	0.633829	-0.0442463	10	10	all	0.325196	-0.0365301	10	10	all	0.579097	0.0672436	10	10	all	0.490744	0.0584717	10	10	all	0.493344	0.0594168	10	10	all	0.648013	0.00149829	10	10	all	0.946384	-0.026492	10	10	all	0.762781	-0.00839546	10	10
AES	all	0.954999	0.00152833	10	10	all	0.202937	-0.00616926	10	10	all	0.315941	-0.00755938	10	10	all	0.817381	0.204514	10	10	all	0.0961354	0.206072	10	10	all	0.267564	0.201101	10	10	all	0.699768	0.167937	10	10	all	0.175901	0.152816	10	10	all	0.343702	0.155421	10	10
AFAP1	ENST00000360265.4	0.134603	-0.0284463	9	9	ENST00000360265.4	0.275019	-0.0233745	9	9	ENST00000360265.4	0.0590625	-0.0209945	9	9	ENST00000360265.4	0.163524	0.141178	8	8	ENST00000360265.4	0.374453	-0.154915	9	9	ENST00000360265.4	0.272293	0.0149587	8	8	ENST00000360265.4	0.366366	0.0372712	9	9	ENST00000360265.4	0.281165	-0.0654853	8	8	ENST00000358461.2	0.569735	0.104465	10	10
AFAP1L2	ENST00000304129.4	0.0872286	0.0131263	5	5	ENST00000369271.3	0.103511	0.0148397	5	5	ENST00000304129.4	0.113197	0.00741204	5	5	ENST00000369271.3	0.616846	-0.0406841	5	5	ENST00000369271.3	0.0105883	-0.105613	5	5	ENST00000369271.3	0.112825	-0.0817794	5	5	ENST00000304129.4	0.592842	0.0237215	5	5	ENST00000369271.3	0.0539414	-0.0697488	5	5	ENST00000369271.3	0.245311	-0.0540289	5	5
AFF1	ENST00000395146.4	0.569823	-0.00741869	10	10	ENST00000395146.4	0.227143	-0.0215443	10	10	ENST00000395146.4	0.356419	-0.0179186	10	10	ENST00000307808.6	0.656168	0.0585954	10	10	ENST00000395146.4	0.363341	0.0785986	10	10	ENST00000395146.4	0.731485	0.0226573	10	10	ENST00000395146.4	0.683189	0.000371584	10	10	ENST00000307808.6	0.51143	0.0370515	10	10	ENST00000307808.6	0.76123	0.0329884	10	10
AFF3	ENST00000317233.4	0.0454125	-0.0142848	10	10	ENST00000409236.2	0.817176	-0.0086459	9	9	ENST00000317233.4	0.190403	-0.0106511	10	10	ENST00000409236.2	0.0260916	-0.0839001	9	9	ENST00000409236.2	0.0243626	-0.0904375	9	9	ENST00000409236.2	0.00648482	-0.0701871	9	9	ENST00000409236.2	0.000969534	-0.0720096	9	9	ENST00000409236.2	0.0127363	-0.0700258	9	9	ENST00000409236.2	0.000699315	-0.0610916	9	9
AFF4	all	0.41579	-0.00937182	10	10	all	0.481181	0.0005597	10	10	all	0.341352	0.000107948	10	10	all	0.582079	0.00671613	10	10	all	0.0853164	-0.0943231	10	10	all	0.414066	-0.0636192	10	10	all	0.962381	-0.0321801	10	10	all	0.146451	-0.0787216	10	10	all	0.277252	-0.0469103	10	10
AFG3L2	all	0.0085267	-0.10284	10	10	all	0.0907742	-0.107253	10	10	all	0.0206442	-0.105047	10	10	all	0.436077	0.169168	10	10	all	0.126064	-0.0715881	9	9	all	0.554152	-0.036257	9	9	all	0.216339	-0.0310171	10	10	all	0.00256333	-0.135817	10	10	all	0.00338893	-0.0771406	10	10
AFM	all	0.211343	-0.0103443	6	6	all	0.227527	0.0171459	6	6	all	0.883277	-0.00179807	6	6	all	0.764459	-0.0309945	6	6	all	0.120587	0.0578918	6	6	all	0.198128	0.0134486	6	6	all	0.519306	-0.0362994	6	6	all	0.0480667	0.0570817	6	6	all	0.156401	0.0103911	6	6
AFMID	all	0.637893	0.00383357	10	10	all	0.66936	-0.0118274	10	10	all	0.697159	-0.00363351	10	10	all	0.464944	-0.029679	10	10	all	0.710898	0.00492946	10	10	all	0.565538	-0.0197132	10	10	all	0.661347	-0.0235043	10	10	all	0.360257	0.00214467	10	10	all	0.473716	0.0100143	10	10
AFP	all	0.0206505	-0.0218277	10	10	all	0.432707	-0.002333	10	10	all	0.0162575	-0.0113091	10	10	all	0.214375	-0.0265189	10	10	all	0.704466	-0.0603334	10	10	all	0.370981	-0.0283717	10	10	all	0.0205024	-0.0711727	10	10	all	0.549386	-0.0195183	10	10	all	0.0826696	-0.0536859	10	10
AFTPH	all	0.832464	-0.00696313	10	10	all	0.0931496	0.016066	10	10	all	0.219203	0.00763129	10	10	all	0.627713	-0.031821	10	10	all	0.721918	0.020685	10	10	all	0.628892	-0.0187472	10	10	all	0.743667	-0.0296646	10	10	all	0.713863	0.0319973	10	10	all	0.840541	0.0262337	10	10
AGA	all	0.774711	0.0159118	10	10	all	0.752331	0.00615171	10	10	all	0.928863	0.00584061	10	10	all	0.634223	0.0747304	10	10	all	0.470766	-0.0341137	10	10	all	0.875556	0.00430513	10	10	all	0.548167	0.0617698	10	10	all	0.488113	-0.0211668	10	10	all	0.935342	0.00785988	10	10
AGAP1	all	0.780775	-0.0091831	10	10	all	0.437527	-0.0131905	10	10	all	0.880142	-0.0215725	10	10	all	0.273049	-0.103102	10	10	all	0.409907	0.0212858	10	10	all	0.29877	-0.0479936	10	10	all	0.201565	-0.0971306	10	10	all	0.183911	-0.0723564	10	10	all	0.0873147	-0.0293499	10	10
AGAP11	all	0.126999	0.0155337	10	10	all	0.226752	0.00475727	10	10	all	0.031581	0.00312228	10	10	all	0.354576	-0.0820119	10	10	all	0.887842	-0.0129954	10	10	all	0.770989	-0.0250473	10	10	all	0.727745	0.0129691	10	10	all	0.608526	0.0336743	10	10	all	0.820702	-0.00994887	10	10
AGAP2	all	0.851285	-0.0148618	10	10	all	0.305577	-0.00647006	10	10	all	0.385122	-0.00597443	10	10	all	0.986109	0.0198871	10	10	all	0.116588	-0.0386341	10	10	all	0.254362	-0.0148356	10	10	all	0.893949	-0.00862315	10	10	all	0.089781	-0.0916932	10	10	all	0.289531	-0.0269699	10	10
AGAP3	all	0.724439	0.00641672	10	10	all	0.530838	0.000751709	10	10	all	0.611133	0.00388391	10	10	all	0.784224	0.00604214	10	10	all	0.434247	-0.0397077	10	10	all	0.51846	-0.00480376	10	10	all	0.852392	0.0146623	10	10	all	0.468944	-0.0265487	10	10	all	0.57674	-0.0195316	10	10
AGAP4	all	0.0871995	-0.0621887	10	10	all	0.215348	-0.0754749	10	10	all	0.0558059	-0.0702793	10	10	all	0.416652	0.0169165	10	10	all	0.507288	0.120921	10	10	all	0.686509	0.0989749	10	10	all	0.0118477	-0.0887572	10	10	all	0.48599	-0.0297484	10	10	all	0.054753	-0.0662971	10	10
AGAP5	all	0.165017	0.0116194	6	6	all	0.107828	0.0140281	6	6	all	0.0651719	0.0115022	6	6	ENST00000443782.2	0.648863	0.0572967	4	4	ENST00000443782.2	0.0870901	0.0947269	4	4	ENST00000443782.2	0.268196	0.0760118	4	4	all	0.386648	0.0149698	6	6	ENST00000443782.2	0.0433868	0.0627061	4	4	ENST00000443782.2	0.136105	0.0483183	4	4
AGAP6	all	0.451838	-0.0249361	9	9	all	0.238062	-0.0613573	10	10	all	0.572511	-0.0400523	9	9	all	0.77284	0.136427	8	8	all	0.190079	0.189173	9	9	all	0.840161	0.162911	8	8	all	0.556646	0.0752156	9	9	all	0.393539	0.00907112	10	10	all	0.802819	0.0421434	9	9
AGBL1	ENST00000441037.2	0.17119	0.00189312	10	10	ENST00000441037.2	0.128784	0.0185486	10	10	ENST00000441037.2	0.0296129	0.00710302	10	10	ENST00000421325.2	0.0459049	-0.126977	10	10	ENST00000421325.2	0.173011	-0.115228	10	10	ENST00000421325.2	0.0340943	-0.0810421	10	10	ENST00000421325.2	0.0819359	-0.0590419	10	10	ENST00000441037.2	0.252482	-0.00764539	10	10	ENST00000421325.2	0.0536642	-0.0593622	10	10
AGBL2	ENST00000357610.3,ENST00000298861.4	0.0948581	-0.0244381	10	10	ENST00000357610.3,ENST00000298861.4	0.116485	0.0229332	10	10	ENST00000525123.1	0.325084	-0.012844	10	10	ENST00000357610.3,ENST00000298861.4	0.486415	0.0300649	10	10	ENST00000525123.1	0.345801	0.0576909	10	10	ENST00000525123.1	0.603959	0.0555163	10	10	ENST00000525123.1	0.633985	0.0467162	10	10	ENST00000525123.1	0.605447	0.048303	10	10	ENST00000357610.3,ENST00000298861.4	0.769945	0.0186515	10	10
AGBL3	all	0.605653	-0.010247	10	10	all	0.525003	-0.0248662	10	10	all	0.552172	-0.0204941	10	10	all	0.131241	0.0493363	10	10	all	0.00388762	0.141358	10	10	all	0.014203	0.110069	10	10	all	0.213228	0.0324903	10	10	all	0.0110762	0.0959714	10	10	all	0.0302625	0.0403752	10	10
AGBL4	all	0.128143	0.0293367	10	10	all	0.894162	-0.00112855	10	10	all	0.324307	0.0104957	10	10	all	0.0943411	-0.126367	10	10	all	0.984711	0.0131249	10	10	all	0.224676	-0.0692384	10	10	all	0.505823	-0.055029	10	10	all	0.991981	-0.0290893	10	10	all	0.692844	-0.0392024	10	10
AGBL5	all	0.71434	-0.00923795	10	10	all	0.557916	-0.00770506	10	10	all	0.477868	-0.00536811	10	10	all	0.350857	-0.0196464	10	10	all	0.566249	0.0123844	10	10	all	0.541669	-0.0371543	10	10	all	0.273965	-0.0261949	10	10	all	0.279953	0.0181227	10	10	all	0.246184	-0.0251803	10	10
AGFG1	all	0.873661	0.00596957	10	10	all	0.325011	0.00595124	10	10	all	0.464852	0.00310267	10	10	all	0.0242404	0.141093	10	10	all	0.0144633	0.0778072	10	10	all	0.0031438	0.0882788	10	10	all	0.0293673	0.117448	10	10	all	0.00462369	0.0688562	10	10	all	0.00264671	0.0801845	10	10
AGFG2	all	0.988823	-0.0382466	10	10	all	0.564121	-0.0146505	10	10	all	0.785354	-0.019839	10	10	all	0.802222	0.0114142	10	10	all	0.806946	0.0163626	10	10	all	0.989207	0.0138884	10	10	all	0.448928	-0.0466542	10	10	all	0.490525	-0.0434721	10	10	all	0.483048	-0.0395343	10	10
AGGF1	all	0.745676	0.00613971	10	10	all	0.443654	0.0106831	10	10	all	0.680754	0.00268147	10	10	all	0.320151	0.102012	10	10	all	0.1173	0.074256	10	10	all	0.140033	0.0806418	10	10	all	0.304641	0.0827163	10	10	all	0.0495473	0.0608996	10	10	all	0.0921682	0.0663549	10	10
AGK	all	0.0238194	-0.0577015	10	10	all	0.00629342	-0.0540129	10	10	all	0.0222185	-0.0514315	10	10	all	0.0260525	0.206136	10	10	all	0.000526528	0.31727	10	10	all	0.00560277	0.241737	10	10	all	0.268601	0.0592881	10	10	all	0.00104177	0.183862	10	10	all	0.00863019	0.132493	10	10
AGL	ENST00000361915.3	0.141361	-0.0167857	10	10	ENST00000361915.3	0.508927	-0.0145995	10	10	ENST00000361915.3	0.0834011	-0.0134524	10	10	ENST00000361915.3	0.894365	-0.0131472	10	10	ENST00000370165.3,ENST00000370163.3,ENST00000294724.4	0.0194561	0.0879511	10	10	ENST00000370165.3,ENST00000370163.3,ENST00000294724.4	0.193256	0.0362433	10	10	ENST00000361915.3	0.514968	-0.0191291	10	10	ENST00000370165.3,ENST00000370163.3,ENST00000294724.4	0.0333379	0.071098	10	10	ENST00000370165.3,ENST00000370163.3,ENST00000294724.4	0.187782	0.0667115	10	10
AGMAT	all	0.975035	-0.00776591	10	10	all	0.10664	0.0164971	10	10	all	0.356478	0.00409261	10	10	all	0.874283	-0.0090944	10	10	all	0.624428	0.0707411	10	10	all	0.780877	0.0286298	10	10	all	0.714467	0.0212006	10	10	all	0.195676	0.0669525	10	10	all	0.664366	0.0364703	10	10
AGMO	all	0.80577	0.00608303	10	10	all	0.982513	0.0222953	10	10	all	0.387788	0.00887591	10	10	all	0.866361	-0.0868588	10	10	all	0.369399	-0.0640713	10	10	all	0.523753	-0.0744934	10	10	all	0.929064	-0.0650649	10	10	all	0.419486	-0.0195612	10	10	all	0.427058	-0.0347305	10	10
AGO1	all	0.0279204	-0.0333502	10	10	all	0.0038312	-0.0336523	10	10	all	0.00337456	-0.0335013	10	10	all	0.511969	-0.0813047	10	10	all	0.657189	-0.0578854	10	10	all	0.590683	-0.0700835	10	10	all	0.0698936	-0.101909	10	10	all	0.0543348	-0.065177	10	10	all	0.0357849	-0.114105	10	10
AGO2	all	0.0180805	-0.0208107	10	10	all	0.0122788	-0.0290448	10	10	all	0.00284434	-0.0249278	10	10	all	0.719802	0.0438624	10	10	all	0.297321	0.16146	10	10	all	0.414066	0.114705	10	10	all	0.489778	-0.00744322	10	10	all	0.76285	0.0468097	10	10	all	0.804563	0.0345772	10	10
AGO3	all	0.845709	-0.0194809	10	10	all	0.819951	-0.0182913	10	10	all	0.506223	-0.0150368	10	10	all	0.780967	0.042452	10	10	all	0.694878	-0.0289832	10	10	all	0.742925	-0.0132585	10	10	all	0.845001	-0.0284838	10	10	all	0.66648	-0.0581545	10	10	all	0.593606	-0.0428208	10	10
AGO4	all	0.489849	-0.00380826	10	10	all	0.876809	0.000539983	10	10	all	0.634234	0.00228526	10	10	all	0.613706	0.0151332	10	10	all	0.667563	-0.0359511	10	10	all	0.611876	-0.0487306	10	10	all	0.424026	0.0169213	10	10	all	0.69625	-0.0255971	10	10	all	0.48009	-0.0113327	10	10
AGPAT1	ENST00000395496.1	0.0156844	-0.0193886	3	3	ENST00000336984.6	0.0757876	-0.0134167	2	2	ENST00000395496.1	0.0564189	-0.00742858	3	3	ENST00000395497.1	0.15046	0.0553485	4	4	ENST00000395497.1	0.14173	0.0602957	4	4	ENST00000395497.1	0.111455	0.0771443	4	4	ENST00000395497.1	0.194583	0.0285186	4	4	ENST00000395496.1	0.0556473	0.0566781	3	3	ENST00000395497.1	0.136246	0.0568256	4	4
AGPAT2	all	0.305627	-0.0128512	10	10	all	0.385391	0.00252423	10	10	all	0.992827	-0.00570618	10	10	all	0.24419	-0.0282299	10	10	all	0.0500449	-0.105531	10	10	all	0.0745507	-0.0790002	10	10	all	0.106382	-0.0610598	10	10	all	0.0591217	-0.0331555	10	10	all	0.0449681	-0.0565326	10	10
AGPAT3	ENST00000327505.2	0.245834	-0.00688226	3	3	ENST00000327505.2	0.0996795	0.00823776	3	3	ENST00000291572.8	0.247298	-0.0104758	6	6	ENST00000546158.1	0.00865563	0.111465	6	6	ENST00000398063.2	0.0066496	-0.115569	4	4	ENST00000398063.2	0.00467484	-0.095962	4	4	ENST00000546158.1	0.0111982	0.109908	6	6	ENST00000398063.2	0.0557848	-0.144332	4	4	ENST00000546158.1	0.0360669	0.0954778	6	6
AGPAT4	all	0.0554264	-0.0264679	10	10	all	0.662953	-0.015679	10	10	all	0.104575	-0.0158834	10	10	all	0.170864	0.202414	10	10	all	0.897316	0.115419	10	10	all	0.825787	0.158917	10	10	all	0.408385	0.103301	10	10	all	0.862649	0.0319384	10	10	all	0.90599	0.101268	10	10
AGPAT5	all	0.817935	-0.00843551	9	9	all	0.1534	-0.012007	9	9	all	0.202804	-0.0105497	9	9	all	0.142895	0.0508533	9	9	all	0.793084	-0.023736	9	9	all	0.45411	0.0250663	9	9	all	0.144735	0.0563595	9	9	all	0.374579	-0.0246276	9	9	all	0.709369	0.0130197	9	9
AGPAT6	all	0.621643	-0.00511515	10	10	all	0.329194	0.00547261	10	10	all	0.592864	0.000883982	10	10	all	8.47226e-07	0.378487	10	10	all	9.0502e-06	0.394455	10	10	all	6.28943e-07	0.386471	10	10	all	6.40396e-07	0.308788	10	10	all	2.52842e-06	0.299711	10	10	all	3.06373e-07	0.30425	10	10
AGPAT9	ENST00000264409.4	0.278831	-0.0240376	9	9	ENST00000264409.4	0.0908102	-0.0183573	9	9	ENST00000264409.4	0.0477583	-0.0215025	9	9	ENST00000264409.4	0.327946	0.0329083	9	9	ENST00000395226.2	0.433332	-0.0471491	8	8	ENST00000395226.2	0.391481	-0.0288317	8	8	all	0.574454	0.0207269	1	1	ENST00000395226.2	0.177015	-0.0638772	8	8	ENST00000395226.2	0.341651	-0.0682668	8	8
AGPS	all	0.0287926	-0.0189103	10	10	all	0.0178739	-0.00621952	10	10	all	0.0142092	-0.0172002	10	10	all	0.0392447	0.0356483	10	10	all	0.322716	-0.0924546	10	10	all	0.176248	0.0206995	10	10	all	0.537605	-0.0128723	10	10	all	0.421669	-0.0551802	10	10	all	0.933454	-0.0456364	10	10
AGR2	all	0.718083	0.00732075	9	9	all	0.616325	0.00441792	9	9	all	0.676486	0.00606615	9	9	all	0.197166	-0.0571444	9	9	all	0.745952	0.0135143	9	9	all	0.58394	-0.00141113	9	9	all	0.308148	-0.0218808	9	9	all	0.73692	0.0250322	9	9	all	0.582853	0.0102501	9	9
AGRN	all	0.669351	-0.00591127	10	10	all	0.396591	-0.0216355	10	10	all	0.621399	-0.0173533	10	10	all	0.230724	-0.0542107	10	10	all	0.337195	-0.0245705	10	10	all	0.217838	-0.0473913	10	10	all	0.216969	-0.0380978	10	10	all	0.178986	-0.0575152	10	10	all	0.137974	-0.0504234	10	10
AGT	all	0.988463	-0.0135893	10	10	all	0.81859	-0.01016	10	10	all	0.711094	-0.00991379	10	10	all	0.227595	0.121973	10	10	all	0.70434	-0.0563346	10	10	all	0.139699	0.0268284	10	10	all	0.148113	0.0695945	10	10	all	0.526506	-0.0726185	10	10	all	0.315554	0.0221527	10	10
AGTPBP1	all	0.88364	-0.00769657	10	10	all	0.700826	0.00742687	10	10	all	0.460855	-0.00120698	10	10	all	0.3137	0.0745364	10	10	all	0.339848	0.0247329	10	10	all	0.211853	0.0519338	10	10	all	0.293081	0.0147076	10	10	all	0.238754	0.0570641	10	10	all	0.200079	0.0213397	10	10
AGTR1	ENST00000475347.1,ENST00000474935.1,ENST00000461609.1	0.172413	-0.0167783	10	10	ENST00000402260.1	0.2774	0.00625307	5	5	ENST00000475347.1,ENST00000474935.1,ENST00000461609.1	0.38537	-0.00166111	10	10	ENST00000475347.1,ENST00000474935.1,ENST00000461609.1	0.0937085	-0.0911211	10	10	ENST00000475347.1,ENST00000474935.1,ENST00000461609.1	0.0102961	-0.127963	10	10	ENST00000475347.1,ENST00000474935.1,ENST00000461609.1	0.0126001	-0.0986916	10	10	ENST00000475347.1,ENST00000474935.1,ENST00000461609.1	0.0352297	-0.0917992	10	10	ENST00000475347.1,ENST00000474935.1,ENST00000461609.1	0.00683995	-0.0819989	10	10	ENST00000475347.1,ENST00000474935.1,ENST00000461609.1	0.00669328	-0.0826306	10	10
AGTR2	all	0.613962	-0.0135198	10	10	all	0.678933	0.0085403	10	10	all	0.641097	-0.00363901	10	10	all	0.8216	-0.0292371	10	10	all	0.645542	0.0366046	10	10	all	0.741043	0.0195197	10	10	all	0.820979	-0.0282283	10	10	all	0.637911	0.0424303	10	10	all	0.773751	0.000986646	10	10
AGTRAP	all	0.877356	-0.0203335	10	10	all	0.786222	-0.00460732	10	10	all	0.763447	-0.0179904	10	10	all	0.265892	-0.0120434	10	10	all	0.488896	-0.117909	10	10	all	0.311582	-0.0348501	10	10	all	0.377756	-0.0518349	10	10	all	0.59293	-0.0793248	10	10	all	0.428705	-0.060246	10	10
AGXT	all	0.465128	0.00421607	10	10	all	0.607709	0.00496651	10	10	all	0.524918	-0.0037878	10	10	all	0.218324	0.0190851	10	10	all	0.497455	0.047178	10	10	all	0.222609	0.0107762	10	10	all	0.315463	0.0191736	10	10	all	0.691788	0.0280521	10	10	all	0.360078	0.0144404	10	10
AGXT2	all	0.849824	-0.00490244	10	10	all	0.0646377	-0.0164267	10	10	all	0.218398	-0.0136453	10	10	all	0.358143	-0.0219425	10	10	all	0.179608	-0.0667782	10	10	all	0.18371	-0.0848336	10	10	all	0.337259	-0.0232698	10	10	all	0.0418627	-0.0607829	10	10	all	0.113553	-0.0448921	10	10
AHCTF1	all	0.325395	-0.0272099	10	10	all	0.31574	-0.0353749	10	10	all	0.687897	-0.0152438	10	10	all	0.462668	-0.0536013	10	10	all	0.855524	0.0305543	10	10	all	0.590683	-0.0174307	10	10	all	0.20694	-0.0408315	10	10	all	0.27012	-0.0128874	10	10	all	0.144858	-0.0186795	10	10
AHCY	all	0.427571	-0.0327495	10	10	all	0.0512427	-0.0444146	10	10	all	0.0725361	-0.0356754	10	10	all	0.960732	-0.0294265	10	10	all	0.502161	-0.0661491	10	10	all	0.912165	-0.0721604	10	10	all	0.824672	-0.0635645	10	10	all	0.182963	-0.110644	10	10	all	0.522091	-0.08802	10	10
AHCYL1	all	0.000552014	-0.0596145	10	10	all	0.0157794	-0.0711818	10	10	all	0.000290858	-0.0653982	10	10	all	5.6097e-05	0.536133	10	10	all	0.00112867	0.507298	10	10	all	6.87527e-05	0.521716	10	10	all	0.000308198	0.342155	10	10	all	0.00186195	0.279724	10	10	all	0.00053971	0.31094	10	10
AHCYL2	all	0.298771	0.00276405	10	10	all	0.786265	0.00186707	10	10	all	0.964509	0.00937579	10	10	all	0.618121	-0.151395	10	10	all	0.890387	-0.0157738	10	10	all	0.717481	-0.0701176	10	10	all	0.484503	-0.057377	10	10	all	0.846214	0.0115804	10	10	all	0.596348	-0.0409315	10	10
AHDC1	all	0.775144	-0.0250938	10	10	all	0.782227	-0.0108571	10	10	all	0.607096	-0.0114198	10	10	all	0.435378	0.0958247	10	10	all	0.488506	-0.00732233	10	10	all	0.431355	0.0843558	10	10	all	0.714467	0.0821736	10	10	all	0.657798	-0.00276012	10	10	all	0.687096	0.0139343	10	10
AHI1	all	0.477681	0.0158594	10	10	all	0.111661	-0.00911394	10	10	all	0.542836	-0.00213569	10	10	all	0.395763	-0.022894	10	10	all	0.216595	-0.0360729	10	10	all	0.213349	-0.0335473	10	10	all	0.250139	-0.0089309	10	10	all	0.537959	-0.0398652	10	10	all	0.264122	-0.0293566	10	10
AHNAK	all	0.376596	-0.0169663	10	10	all	0.190654	-0.00613236	10	10	all	0.193755	-0.0149267	10	10	all	0.243572	0.108074	10	10	all	0.988048	0.0373118	10	10	all	0.445739	0.038512	10	10	all	0.436142	0.0859673	10	10	all	0.83262	-0.0260315	10	10	all	0.663874	-0.014766	10	10
AHNAK2	all	0.557653	-0.0315988	10	10	all	0.669031	-0.033257	10	10	all	0.916112	-0.036913	10	10	all	0.501189	0.0321822	10	10	all	0.905014	-0.0426808	10	10	all	0.735235	-0.0240788	10	10	all	0.884799	-0.0143891	10	10	all	0.366606	-0.0528012	10	10	all	0.846645	-0.0536031	10	10
AHR	all	0.956799	-0.00610251	10	10	all	0.467398	-0.00351661	10	10	all	0.870962	-0.00686916	10	10	all	0.0882824	0.0657997	10	10	all	0.692374	0.0389463	10	10	all	0.583435	0.059002	10	10	all	0.0732354	0.08158	10	10	all	0.666808	0.0223983	10	10	all	0.537493	0.0693404	10	10
AHRR	all	0.0135394	-0.0156272	10	10	all	0.319378	0.00982997	10	10	all	0.230562	-0.00899506	10	10	all	0.186072	0.125294	10	10	all	0.62155	0.0563401	10	10	all	0.291151	0.0996309	10	10	all	0.537605	0.0441598	10	10	all	0.493229	0.0600843	10	10	all	0.533472	0.0834734	10	10
AHSA1	all	0.920314	0.00652784	10	10	all	0.483611	-0.0173281	10	10	all	0.648399	-0.00471829	10	10	all	3.76644e-05	-0.151884	10	10	all	0.00029886	-0.178559	10	10	all	5.92977e-06	-0.143773	10	10	all	7.50576e-05	-0.128629	10	10	all	3.65877e-05	-0.130215	10	10	all	3.73295e-06	-0.117252	10	10
AHSA2	all	0.756047	-0.00477197	10	10	all	0.532543	0.00350187	10	10	all	0.843266	-7.92465e-06	10	10	all	0.130004	0.0887446	10	10	all	0.0973961	0.0814323	10	10	all	0.0417407	0.0730397	10	10	all	0.0747427	0.071491	10	10	all	0.0597009	0.0552735	10	10	all	0.0263035	0.053495	10	10
AHSG	all	0.193972	-0.0535241	9	9	all	0.256979	-0.0677608	9	9	all	0.19782	-0.0606425	9	9	all	0.750649	0.107395	9	9	all	0.664995	0.033483	9	9	all	0.672945	0.0849728	9	9	all	0.328413	0.023136	9	9	all	0.344988	-0.0687936	9	9	all	0.295836	-0.0394845	9	9
AHSP	all	0.741625	0.00578505	9	9	all	0.380577	-0.0104309	9	9	all	0.643082	-0.00576758	9	9	all	0.332682	0.0545008	9	9	all	0.804821	-0.00704679	9	9	all	0.667467	0.00506188	9	9	all	0.232012	0.0466841	9	9	all	0.523821	-0.0458194	9	9	all	0.816306	-0.000550256	9	9
AICDA	all	0.488217	0.00666067	10	10	all	0.418076	-0.0034591	10	10	all	0.296959	0.00478223	10	10	all	0.170018	0.0981486	10	10	all	0.175519	0.0379457	10	10	all	0.153941	0.0946397	10	10	all	0.0611721	0.0781428	10	10	all	0.186797	0.0411754	10	10	all	0.0991437	0.0838066	10	10
AIDA	all	0.714298	0.00115502	10	10	all	0.839418	-0.0167098	10	10	all	0.627561	-0.00559529	10	10	all	0.865694	0.0567402	10	10	all	0.0308363	-0.0334537	10	10	all	0.413096	-0.0253502	10	10	all	0.831979	0.042576	10	10	all	0.0147192	-0.0813072	10	10	all	0.314629	-0.0317301	10	10
AIF1	all	0.630608	-0.00400221	10	10	all	0.642465	0.0132945	10	10	all	0.594116	0.00340924	10	10	all	0.305091	0.123848	10	10	all	0.603342	-0.0340937	10	10	all	0.639943	0.0298594	10	10	all	0.267673	0.094814	10	10	all	0.994098	-0.0246665	10	10	all	0.599488	0.0315588	10	10
AIF1L	all	0.385237	-0.0211515	9	9	all	0.51373	0.0114228	9	9	all	0.75078	-0.00700462	9	9	all	0.899332	0.051873	9	9	all	0.939486	-0.035651	9	9	all	0.941073	0.0284882	9	9	all	0.711017	0.0288423	9	9	all	0.766324	0.0159515	9	9	all	0.869353	-0.0119222	9	9
AIFM1	all	0.859441	-0.00279616	10	10	all	0.197206	-0.00494633	10	10	all	0.164216	-0.000454843	10	10	all	0.888288	0.0164861	10	10	all	0.716464	0.0607959	10	10	all	0.925012	0.0211414	10	10	all	0.946632	0.00737227	10	10	all	0.969553	0.0113644	10	10	all	0.911098	0.010629	10	10
AIFM2	ENST00000373248.1	0.290599	-0.0112982	10	10	ENST00000373248.1	0.0597761	0.0106306	10	10	ENST00000307864.1	0.125401	0.00362143	10	10	ENST00000373248.1	0.475368	0.044091	10	10	ENST00000307864.1	0.363281	-0.0283453	10	10	ENST00000307864.1	0.372072	-0.0283154	10	10	ENST00000307864.1	0.653871	-0.0149431	10	10	ENST00000373248.1	0.585337	0.0251851	10	10	ENST00000307864.1	0.599645	-0.0099713	10	10
AIFM3	ENST00000405089.1	0.392637	0.0196878	6	6	ENST00000405089.1	0.0249654	-0.0153351	6	6	ENST00000405089.1	0.548965	0.00146857	6	6	ENST00000405089.1	0.284363	-0.0901349	6	6	ENST00000333607.6	0.406224	-0.0108244	10	10	ENST00000405089.1	0.44552	-0.0273612	6	6	ENST00000333607.6	0.29801	0.0361608	10	10	ENST00000333607.6	0.391445	0.022165	10	10	ENST00000333607.6	0.27976	0.0277786	10	10
AIG1	all	0.180455	0.00667334	10	10	all	0.577401	-0.0034264	10	10	all	0.81392	0.000546639	10	10	all	0.836272	0.020276	10	10	all	0.809179	-0.0452409	10	10	all	0.842841	-0.0090609	10	10	all	0.476946	0.0217899	10	10	all	0.875225	-0.043559	10	10	all	0.538463	-0.0127275	10	10
AIM1	all	0.858687	-0.00504586	10	10	all	0.540998	-0.00696504	10	10	all	0.646611	-0.00367275	10	10	all	0.57759	0.0388103	10	10	all	0.341108	0.0713222	10	10	all	0.365618	0.0304903	10	10	all	0.488323	0.0250216	10	10	all	0.471964	0.0235671	10	10	all	0.385852	0.0414742	10	10
AIM1L	all	0.0796591	-0.021049	10	10	all	0.913537	0.00202448	10	10	all	0.0790609	-0.00296886	10	10	all	0.626951	-0.00264098	10	10	all	0.726198	-0.0039302	10	10	all	0.54392	-0.0086533	10	10	all	0.845399	-0.0315647	10	10	all	0.817321	0.00798294	10	10	all	0.896232	-0.0195072	10	10
AIM2	all	0.348758	-0.00158302	10	10	all	0.428314	0.0100222	10	10	all	0.965681	0.0050778	10	10	all	0.594035	-0.0487448	10	10	all	0.609464	0.000767076	10	10	all	0.97458	-0.0113729	10	10	all	0.36827	-0.0390812	10	10	all	0.393194	0.00944243	10	10	all	0.954332	-0.0305418	10	10
AIMP1	all	0.439778	0.00311057	10	10	all	0.352411	0.0039413	10	10	all	0.345788	0.00893367	10	10	all	0.971637	0.0716604	10	10	all	0.895617	0.0197702	10	10	all	0.888598	0.0422183	10	10	all	0.707313	0.0415914	10	10	all	0.665659	0.0442863	10	10	all	0.610061	0.0401422	10	10
AIMP2	all	0.678385	-0.00462111	10	10	all	0.0983946	0.016902	10	10	all	0.225242	0.0126629	10	10	all	0.210416	0.097067	10	10	all	0.664645	0.0269276	10	10	all	0.389977	0.0384613	10	10	all	0.111177	0.0658634	10	10	all	0.199704	0.0228468	10	10	all	0.153137	0.0317439	10	10
AIP	all	0.777481	-0.00722821	10	10	all	0.92762	-0.00251264	10	10	all	0.990391	-0.00556865	10	10	all	0.4461	0.0313773	10	10	all	0.861739	-0.0054832	10	10	all	0.809342	0.0158967	10	10	all	0.565383	0.026328	10	10	all	0.955737	-0.00533074	10	10	all	0.946678	0.0199125	10	10
AIPL1	all	0.865479	0.0323841	10	10	all	0.542307	-0.0134621	10	10	all	0.965951	0.00410083	10	10	all	0.511569	-0.111288	10	10	all	0.567977	0.0236079	9	9	all	0.605176	0.0280212	9	9	all	0.820527	-0.022974	9	9	all	0.30548	-0.0888467	10	10	all	0.520441	-0.013068	9	9
AIRE	all	0.079098	0.0122985	10	10	all	0.254773	-0.00745491	10	10	all	0.744806	-0.000553472	10	10	all	0.0348243	0.0990175	10	10	all	0.736232	0.0466649	10	10	all	0.139063	0.0997445	10	10	all	0.00985988	0.0965979	10	10	all	0.811536	0.0276401	10	10	all	0.0979451	0.0847071	10	10
AJUBA	ENST00000262713.2	0.135097	0.00816656	6	6	all	0.0129843	-0.0176035	4	4	all	0.0224046	-0.0129234	4	4	ENST00000262713.2	0.0615382	0.0569355	6	6	ENST00000262713.2	0.108909	0.108976	6	6	ENST00000262713.2	0.0545888	0.0812124	6	6	ENST00000262713.2	0.0233536	0.0770934	6	6	ENST00000262713.2	0.0451276	0.0761768	6	6	ENST00000262713.2	0.015446	0.0704793	6	6
AK1	ENST00000373156.1	0.165933	-0.014828	10	10	ENST00000373176.1	0.10576	-0.040785	10	10	ENST00000373176.1	0.189523	-0.04991	10	10	ENST00000373176.1	0.631085	0.0336197	10	10	ENST00000373156.1	0.452638	-0.0259889	10	10	ENST00000373156.1	0.618164	-0.0286286	10	10	ENST00000373176.1	0.37953	-0.0393711	10	10	ENST00000373176.1	0.235484	-0.0600624	10	10	ENST00000373176.1	0.310295	-0.0653773	10	10
AK2	all	0.558336	-0.00611789	10	10	all	0.0123299	-0.0256333	10	10	all	0.0286279	-0.0152779	10	10	all	0.000380163	-0.190511	10	10	all	0.0109923	-0.216483	10	10	all	0.00139947	-0.197174	10	10	all	0.000392799	-0.171314	10	10	all	0.00586387	-0.211341	10	10	all	0.00111816	-0.188987	10	10
AK3	all	0.479399	-0.00268599	10	10	all	0.211503	0.000441359	10	10	all	0.904278	0.000974816	10	10	all	0.907791	-0.0134544	10	10	all	0.536119	-0.0187206	10	10	all	0.664583	-0.0122941	10	10	all	0.708448	0.0108167	10	10	all	0.934973	-0.0222748	10	10	all	0.760024	-0.0138363	10	10
AK4	ENST00000545314.1	0.310062	-0.011545	6	6	ENST00000327299.7	0.382488	0.00688723	9	9	ENST00000545314.1	0.641946	-0.00751035	6	6	ENST00000327299.7	0.602215	-0.0311468	9	9	ENST00000395334.2	0.208229	-0.0733179	6	6	ENST00000395334.2	0.306893	-0.0259371	6	6	ENST00000327299.7	0.559688	-0.032674	9	9	ENST00000545314.1	0.334059	-0.0539782	6	6	ENST00000395334.2	0.423966	-0.0309516	6	6
AK5	all	0.11047	0.00638806	10	10	all	0.278776	0.0120734	10	10	all	0.0468023	0.0110216	10	10	all	0.0569526	-0.150629	10	10	all	0.557406	-0.0754316	10	10	all	0.212393	-0.128474	10	10	all	0.144334	-0.119438	10	10	all	0.971489	-0.0590213	10	10	all	0.548816	-0.106518	10	10
AK7	all	0.0401048	0.0193461	10	10	all	0.732134	0.00214727	10	10	all	0.150125	0.0103703	10	10	all	0.344761	-0.114603	10	10	all	0.438078	-0.0136139	10	10	all	0.258823	-0.0313869	10	10	all	0.720841	-0.0304679	10	10	all	0.330144	-0.00611707	10	10	all	0.392828	-0.0102557	10	10
AK8	all	0.158051	-0.00543399	10	10	all	0.962287	0.00505898	10	10	all	0.548775	-0.00593883	10	10	all	0.50371	-0.0440952	10	10	all	0.25644	-0.0569683	10	10	all	0.350639	-0.0541454	10	10	all	0.202744	-0.0330492	10	10	all	0.326234	-0.0494156	10	10	all	0.245632	-0.0444783	10	10
AK9	all	0.0979929	0.00410037	10	10	all	0.614918	-0.0107978	10	10	all	0.564334	-0.00279623	10	10	all	0.000237148	-0.136803	10	10	all	0.0851216	-0.202189	10	10	all	0.00245329	-0.156665	10	10	all	0.000961781	-0.107171	10	10	all	0.0589852	-0.154638	10	10	all	0.00379417	-0.117846	10	10
AKAP1	ENST00000337714.3	0.322084	-0.00832621	7	7	ENST00000539273.1	0.256264	0.00619463	3	3	ENST00000572557.1	0.310317	0.00022189	7	7	ENST00000337714.3	0.146232	-0.0428847	7	7	ENST00000337714.3	0.163447	-0.107363	7	7	ENST00000337714.3	0.159848	-0.100169	7	7	ENST00000337714.3	0.0396009	-0.0317309	7	7	ENST00000337714.3	0.126312	-0.0600504	7	7	ENST00000337714.3	0.0980241	-0.0939919	7	7
AKAP10	all	0.712908	0.00197147	10	10	all	0.381967	0.0132218	10	10	all	0.312082	0.00646507	10	10	all	0.637691	-0.0626129	10	10	all	0.00869894	-0.0935393	10	10	all	0.0596467	-0.0835156	10	10	all	0.505426	-0.0315878	10	10	all	0.0274655	-0.0627996	10	10	all	0.103288	-0.0622734	10	10
AKAP11	all	0.576784	-0.00441755	10	10	all	0.552764	-0.00109444	10	10	all	0.896848	0.00284585	10	10	all	0.10591	-0.0250401	10	10	all	0.0195977	-0.0950908	10	10	all	0.0451726	-0.0928745	10	10	all	0.0955639	-0.0270617	10	10	all	0.0355963	-0.0760152	10	10	all	0.0516765	-0.0781979	10	10
AKAP12	ENST00000359755.5	0.0942537	0.0186777	8	8	ENST00000253332.1	0.131855	-0.00622871	9	9	ENST00000359755.5	0.130306	0.00487002	8	8	ENST00000354675.6	0.370228	-0.0778781	6	6	ENST00000359755.5	0.0393549	0.0826115	8	8	ENST00000359755.5	0.181467	0.0499075	8	8	ENST00000354675.6	0.378144	-0.0191787	6	6	ENST00000359755.5	0.0224673	0.0641682	8	8	ENST00000359755.5	0.0774006	0.0523703	8	8
AKAP13	all	0.700521	0.00307683	10	10	all	0.117078	0.00698011	10	10	all	0.485546	0.00488974	10	10	all	0.557596	0.0408675	10	10	all	0.540186	0.0554089	10	10	all	0.41575	0.0262002	10	10	all	0.511692	-0.00815003	10	10	all	0.21044	0.0538029	10	10	all	0.301536	0.0532544	10	10
AKAP14	ENST00000371431.3,ENST00000371425.4,ENST00000394594.2	0.191044	0.0273659	10	10	ENST00000371425.4,ENST00000394594.2,ENST00000371422.1,ENST00000334356.2	0.024684	0.0261569	7	7	ENST00000371425.4,ENST00000394594.2,ENST00000371422.1,ENST00000334356.2	0.0364834	0.0131597	7	7	ENST00000371422.1,ENST00000334356.2	0.0943614	0.0548365	3	3	ENST00000371431.3,ENST00000371425.4,ENST00000394594.2	0.131646	-0.0279127	10	10	ENST00000371422.1,ENST00000334356.2	0.108534	0.0432407	3	3	ENST00000371422.1,ENST00000334356.2	0.0777051	0.0479202	3	3	ENST00000371431.3,ENST00000371425.4,ENST00000394594.2	0.203632	-0.0200158	10	10	ENST00000371422.1,ENST00000334356.2	0.120888	0.0344984	3	3
AKAP17A	all	0.677682	0.00275372	10	10	all	0.584561	-0.0173148	10	10	all	0.745919	-0.01394	10	10	all	0.357227	0.0775245	10	10	all	0.0425682	0.181434	10	10	all	0.126213	0.15285	10	10	all	0.299718	0.0669104	10	10	all	0.116792	0.134123	10	10	all	0.195045	0.125606	10	10
AKAP2	ENST00000555236.1,ENST00000510514.5	0.0129176	0.0237373	10	10	ENST00000434623.2,ENST00000374525.1	0.112439	-0.0416455	10	10	ENST00000259318.7	0.0646378	-0.00751272	5	5	ENST00000434623.2,ENST00000374525.1	0.34505	0.0380096	10	10	ENST00000555236.1,ENST00000510514.5	0.447248	0.0431423	10	10	ENST00000434623.2,ENST00000374525.1	0.48545	0.0361723	10	10	ENST00000259318.7	0.232815	-0.0397463	5	5	ENST00000434623.2,ENST00000374525.1	0.233572	-0.026066	10	10	ENST00000259318.7	0.188712	-0.0268265	5	5
AKAP3	ENST00000545990.2	0.0140103	-0.0344097	10	10	ENST00000545990.2	0.0997595	-0.0090286	10	10	ENST00000545990.2	0.00755573	-0.0243997	10	10	ENST00000545990.2	0.0349168	0.185736	10	10	ENST00000545990.2	0.0135126	0.0999	10	10	ENST00000545990.2	0.0064147	0.128499	10	10	ENST00000545990.2	0.235848	0.109339	10	10	ENST00000545990.2	0.0919926	0.0817179	10	10	ENST00000545990.2	0.0871475	0.0828274	10	10
AKAP4	ENST00000376056.2	0.364493	-0.0196118	10	10	ENST00000376064.3	0.184824	0.0132134	10	10	ENST00000376056.2	0.17833	-0.00474057	10	10	ENST00000376064.3	0.322938	-0.128301	10	10	ENST00000376064.3	0.67201	-0.0623668	10	10	ENST00000376064.3	0.460461	-0.0749958	10	10	ENST00000376064.3	0.247312	-0.064914	10	10	ENST00000376064.3	0.859499	-0.0201901	10	10	ENST00000376064.3	0.582544	-0.0516742	10	10
AKAP5	ENST00000394718.4	0.402074	0.00436838	10	10	ENST00000320636.5	0.151603	0.015155	10	10	ENST00000394718.4	0.391403	0.00458436	10	10	ENST00000394718.4	0.461291	0.0429535	10	10	ENST00000320636.5	0.353813	-0.00731053	10	10	ENST00000320636.5	0.385189	0.00272872	10	10	ENST00000394718.4	0.327762	0.0491146	10	10	ENST00000320636.5	0.199664	0.00905204	10	10	ENST00000320636.5	0.296538	0.00592643	10	10
AKAP6	all	0.189534	0.015137	10	10	all	0.932289	-0.00271476	10	10	all	0.315832	0.00819943	10	10	all	0.26684	0.0231097	10	10	all	0.490175	0.0211323	10	10	all	0.321592	0.0293659	10	10	all	0.0999807	0.0679607	10	10	all	0.478423	0.0196538	10	10	all	0.175583	0.0512234	10	10
AKAP7	all	0.32726	-0.0164615	10	10	all	0.61119	-0.00417623	10	10	all	0.14023	-0.0109514	10	10	all	0.784962	-0.0332913	10	10	all	0.26422	-0.0320052	10	10	all	0.450616	-0.0375861	10	10	all	0.437174	-0.0538914	10	10	all	0.22225	-0.0613486	10	10	all	0.289068	-0.0468984	10	10
AKAP8	all	0.606443	-0.0178598	10	10	all	0.397189	-0.0167335	10	10	all	0.394786	-0.0155639	10	10	all	0.620992	0.143309	10	10	all	0.129203	0.0727863	10	10	all	0.185922	0.0901446	10	10	all	0.591411	0.0946845	10	10	all	0.117254	0.0294876	10	10	all	0.196569	0.0429666	10	10
AKAP8L	all	0.528106	-0.0101651	10	10	all	0.294642	-0.0266004	10	10	all	0.336043	-0.0150256	10	10	all	0.554221	0.0353844	10	10	all	0.0240912	0.138061	10	10	all	0.104386	0.106209	10	10	all	0.854076	0.0239256	10	10	all	0.0865596	0.0961818	10	10	all	0.276952	0.0774334	10	10
AKAP9	all	0.0088231	-0.0071567	10	10	all	0.0172954	-0.014571	10	10	all	0.00289414	-0.0178655	10	10	all	0.0670782	-0.0938829	10	10	all	0.91909	-0.0262223	10	10	all	0.301251	-0.0305387	10	10	all	0.00574736	-0.0969597	10	10	all	0.467316	-0.0358978	10	10	all	0.0453442	-0.0789744	10	10
AKIP1	ENST00000309357.4,ENST00000534147.1	0.348129	0.00847914	1	1	ENST00000309377.4,ENST00000309357.4	0.121432	-0.0154382	8	8	ENST00000309377.4,ENST00000309357.4	0.287424	-0.0272244	8	8	ENST00000534147.1	0.27026	-0.0154228	7	7	ENST00000309357.4,ENST00000534147.1	0.0934787	0.168937	1	1	ENST00000309357.4,ENST00000534147.1	0.106478	0.112084	1	1	ENST00000309357.4,ENST00000534147.1	0.184123	0.0623587	1	1	ENST00000309357.4,ENST00000534147.1	0.0911168	0.138797	1	1	ENST00000309357.4,ENST00000534147.1	0.0993551	0.100578	1	1
AKIRIN1	all	0.0906028	-0.0482734	10	10	all	0.00017519	-0.0626031	10	10	all	0.00263419	-0.0547145	10	10	all	0.187165	0.048297	10	10	all	0.0852959	0.121283	10	10	all	0.0583856	0.090852	10	10	all	0.89185	-0.0405004	10	10	all	0.416241	-0.0345605	10	10	all	0.558734	-0.00154527	10	10
AKIRIN2	all	0.336719	-0.0186415	10	10	all	0.00824222	-0.022591	10	10	all	0.0283494	-0.0246814	10	10	all	0.602515	0.0653816	10	10	all	0.287578	0.155995	10	10	all	0.736259	0.0759282	10	10	all	0.575551	0.0149575	10	10	all	0.750098	0.0237013	10	10	all	0.918095	0.0246545	10	10
AKNA	ENST00000374088.3	0.899759	-0.0179925	10	10	ENST00000374088.3	0.402946	-0.00552396	10	10	ENST00000374088.3	0.41429	-0.0123262	10	10	ENST00000374088.3	0.0205807	0.21637	10	10	ENST00000374088.3	0.335689	0.167155	10	10	ENST00000374088.3	0.0460298	0.176829	10	10	ENST00000374088.3	0.0182327	0.149376	10	10	ENST00000374088.3	0.132026	0.106224	10	10	ENST00000374088.3	0.021522	0.119623	10	10
AKR1A1	ENST00000351829.4	0.217453	0.00788782	10	10	ENST00000351829.4	0.170036	0.0123634	10	10	ENST00000351829.4	0.0854984	0.0106103	10	10	ENST00000351829.4	0.00212964	0.177554	10	10	ENST00000351829.4	0.00700188	0.172796	10	10	ENST00000351829.4	0.00127381	0.167971	10	10	ENST00000351829.4	0.000573676	0.155534	10	10	ENST00000351829.4	0.00152073	0.14465	10	10	ENST00000351829.4	0.000286978	0.144126	10	10
AKR1B1	all	0.386151	0.00490486	10	10	all	0.858318	-0.00395203	10	10	all	0.378965	0.000970029	10	10	all	0.76427	-0.0513801	10	10	all	0.992874	0.0058895	10	10	all	0.739247	-0.0240492	10	10	all	0.80857	-0.0542279	10	10	all	0.967437	0.00352335	10	10	all	0.985431	-0.0283395	10	10
AKR1B10	all	0.540255	-0.008688	10	10	all	0.0164776	-0.018484	10	10	all	0.19457	-0.011945	10	10	all	0.78036	-0.0553062	10	10	all	0.810669	-0.00150725	10	10	all	0.720359	-0.0495247	10	10	all	0.902219	-0.0442527	10	10	all	0.501064	-0.0466638	10	10	all	0.72685	-0.0483529	10	10
AKR1B15	all	0.857097	-0.0139302	8	8	all	0.299524	0.00840063	8	8	all	0.478558	-0.003988	8	8	all	0.00540853	0.194333	8	8	all	0.353313	0.0473969	8	8	all	0.247726	0.134424	8	8	all	0.00184806	0.138244	8	8	all	0.60141	-0.0123262	8	8	all	0.216037	0.109282	8	8
AKR1C1	ENST00000380872.4	0.135786	-0.0221441	9	9	ENST00000380872.4	0.211668	0.0221496	10	10	ENST00000434459.2	0.348921	0.00736493	10	10	ENST00000434459.2	0.130895	-0.049788	10	10	ENST00000380872.4	0.701237	-0.0373616	10	10	ENST00000434459.2	0.279666	-0.0556146	10	10	ENST00000434459.2	0.211881	-0.023487	10	10	ENST00000380872.4	0.195426	0.0935784	9	9	ENST00000434459.2	0.352883	0.0172842	10	10
AKR1C2	ENST00000407674.1	0.258756	-0.014999	10	10	ENST00000380753.4	0.410968	0.0226239	10	10	ENST00000380753.4	0.564025	0.00021086	9	9	ENST00000407674.1	0.395763	-0.00390065	10	10	ENST00000380753.4	0.355164	-0.036134	10	10	ENST00000380753.4	0.207324	0.103322	9	9	ENST00000380753.4	0.318117	0.0279051	9	9	ENST00000380753.4	0.0746831	0.08901	9	9	ENST00000380753.4	0.156612	0.0766834	9	9
AKR1C3	all	0.617678	-0.0218115	7	7	all	0.169797	-0.0181371	7	7	all	0.181901	-0.0118192	7	7	all	0.624916	-0.0217051	7	7	all	0.499079	0.0427294	7	7	all	0.98019	0.0251146	7	7	all	0.415367	-0.0645644	7	7	all	0.96662	0.0155077	7	7	all	0.648365	-0.00021236	7	7
AKR1C4	ENST00000380448.1	0.108169	-0.00495434	10	10	ENST00000380448.1	0.0249713	-0.022257	10	10	ENST00000380448.1	0.0191507	-0.0184848	10	10	ENST00000380448.1	0.00695921	-0.0924514	10	10	ENST00000380448.1	0.15588	-0.0943377	10	10	ENST00000380448.1	0.0240756	-0.0855315	10	10	ENST00000380448.1	0.00629341	-0.103102	10	10	ENST00000380448.1	0.0834121	-0.10704	10	10	ENST00000380448.1	0.0143582	-0.100808	10	10
AKR1D1	all	0.753342	0.0143429	10	10	all	0.919319	-0.0058625	10	10	all	0.964238	0.00476837	10	10	all	0.730784	-0.020799	10	10	all	0.5267	0.0137879	10	10	all	0.529147	0.022286	10	10	all	0.608694	0.0346507	10	10	all	0.644944	0.0231417	10	10	all	0.515935	0.0201455	10	10
AKR1E2	all	0.718771	-0.0170224	10	10	all	0.358085	-0.0120864	10	10	all	0.880766	0.00125308	10	10	all	0.291956	-0.0449149	10	10	all	0.478555	-0.066527	10	10	all	0.364899	-0.0734084	10	10	all	0.328992	-0.0900579	10	10	all	0.445874	-0.0164436	10	10	all	0.301536	-0.0356345	10	10
AKR7A2	all	0.688587	-0.0063295	10	10	all	0.43756	-0.00550246	10	10	all	0.361871	-0.00344004	10	10	all	0.0915046	0.00754775	10	10	all	0.00619699	-0.111741	10	10	all	0.0303857	-0.0859871	10	10	all	0.0619731	0.00869969	10	10	all	0.00260323	-0.0907359	10	10	all	0.0167114	-0.0727421	10	10
AKR7A3	all	0.891404	-0.00328497	10	10	all	0.299721	0.0145294	10	10	all	0.746518	0.00474801	10	10	all	0.204406	-0.0829929	10	10	all	0.165093	-0.0955345	10	10	all	0.138098	-0.109696	10	10	all	0.127662	-0.113448	10	10	all	0.276524	-0.0658515	10	10	all	0.124135	-0.0854356	10	10
AKT1	ENST00000554581.1,ENST00000554848.1	0.0676058	0.0192609	10	10	ENST00000407796.2,ENST00000349310.3	0.000450702	-0.0264469	10	10	ENST00000407796.2,ENST00000349310.3	0.00240836	-0.0230258	10	10	ENST00000402615.2	0.230308	-0.0371105	3	3	ENST00000407796.2,ENST00000349310.3	0.248219	0.0718441	10	10	ENST00000402615.2	0.32594	-0.0223383	3	3	ENST00000402615.2	0.142759	-0.038594	3	3	ENST00000554581.1,ENST00000554848.1	0.321168	0.0564758	10	10	ENST00000402615.2	0.417279	-0.014267	3	3
AKT1S1	ENST00000391833.1	0.293815	0.00272902	5	5	ENST00000391831.1	0.0592568	0.0218892	10	10	ENST00000391833.1	0.062898	0.0072791	5	5	ENST00000391831.1	0.0276515	0.106069	10	10	ENST00000391831.1	0.243824	0.0467259	10	10	ENST00000391831.1	0.0755694	0.0668759	10	10	ENST00000391831.1	0.0418806	0.0548059	10	10	ENST00000391831.1	0.0686585	0.0946501	10	10	ENST00000391831.1	0.0304008	0.0850843	10	10
AKT2	ENST00000392038.2	7.11393e-07	-0.0473831	10	10	ENST00000392038.2	8.97352e-05	-0.0520495	10	10	ENST00000392038.2	6.87474e-07	-0.0490162	10	10	ENST00000424901.1	0.519638	-0.0598821	10	10	ENST00000392038.2	0.0385763	0.0296578	10	10	ENST00000392038.2	0.148683	0.00790208	10	10	ENST00000392038.2	0.019961	-0.18535	10	10	ENST00000424901.1	0.276175	-0.156312	10	10	ENST00000392038.2	0.204844	-0.103608	10	10
AKT3	ENST00000366539.1	0.253012	-0.0134354	10	10	ENST00000366539.1	0.260186	-0.0191918	10	10	ENST00000366539.1	0.16795	-0.014849	10	10	ENST00000263826.5	0.215315	-0.0736069	10	10	ENST00000263826.5	0.473273	-0.117119	10	10	ENST00000263826.5	0.209502	-0.0807376	10	10	ENST00000263826.5	0.240524	-0.0602935	10	10	ENST00000366539.1	0.753441	-0.0399102	10	10	ENST00000263826.5	0.485026	-0.0720708	10	10
AKTIP	all	0.814002	-0.00496598	10	10	all	0.0182763	0.00922021	10	10	all	0.0838051	0.0113697	10	10	all	0.244075	0.0423216	10	10	all	0.730359	0.0696021	10	10	all	0.447429	0.0692652	10	10	all	0.183917	0.0296214	10	10	all	0.183911	0.0681979	10	10	all	0.158641	0.0660392	10	10
ALAD	all	0.00381489	-0.04651	10	10	all	0.000103893	-0.047527	10	10	all	0.000100079	-0.0468286	10	10	all	0.0101295	0.227292	10	10	all	0.000357302	0.210548	10	10	all	0.000471535	0.212869	10	10	all	0.0281626	0.117175	10	10	all	0.00871581	0.0989946	10	10	all	0.00559075	0.0983723	10	10
ALAS1	all	0.0325748	-0.0244737	10	10	all	0.00610186	-0.0248605	10	10	all	0.000143877	-0.0184036	10	10	all	0.182151	0.0335815	10	10	all	0.0853883	0.154274	10	10	all	0.0703589	0.108495	10	10	all	0.883818	0.0090061	10	10	all	0.302875	0.0970249	10	10	all	0.6288	0.0717271	10	10
ALAS2	all	0.361216	0.00850285	10	10	all	0.882112	-0.00695206	10	10	all	0.756816	0.00337726	10	10	all	0.534518	0.0145537	10	10	all	0.687459	0.0315953	10	10	all	0.587093	0.0255515	10	10	all	0.358785	0.057432	10	10	all	0.730993	0.0134544	10	10	all	0.453034	0.0404516	10	10
ALB	all	0.208632	0.00408262	10	10	all	0.600458	-0.00529834	10	10	all	0.749088	-0.00330696	10	10	all	0.5762	-0.0138961	10	10	all	0.593879	-0.0399462	10	10	all	0.979365	-0.0231547	10	10	all	0.387888	-0.0277713	10	10	all	0.967707	-0.0236529	10	10	all	0.694598	0.0291063	10	10
ALCAM	all	0.267234	0.0119613	10	10	all	0.244001	0.0107889	10	10	all	0.145285	0.0108024	10	10	all	0.469515	0.0220388	10	10	all	0.910121	0.029857	10	10	all	0.788272	0.0598955	10	10	all	0.254022	0.0319214	10	10	all	0.834295	0.0365259	10	10	all	0.456309	0.0565671	10	10
ALDH16A1	all	0.284252	0.00688266	10	10	all	0.99725	0.0165023	10	10	all	0.400844	0.00636669	10	10	all	0.196067	0.00299379	10	10	all	0.725435	0.0415958	10	10	all	0.765196	0.0257449	10	10	all	0.545048	-0.0137338	10	10	all	0.531605	0.0332165	10	10	all	0.998602	0.0284523	10	10
ALDH18A1	all	0.14438	-0.00712705	10	10	all	0.193135	-0.0279216	10	10	all	0.0626346	-0.0189439	10	10	all	0.0401914	-0.103814	10	10	all	0.0191929	-0.0959532	10	10	all	0.00440671	-0.0758873	10	10	all	0.0123625	-0.0964609	10	10	all	0.00267578	-0.0963512	10	10	all	0.00176789	-0.0872994	10	10
ALDH1A1	all	0.779388	0.00326222	10	10	all	0.95792	0.0111499	10	10	all	0.983986	0.00712532	10	10	all	0.564071	-0.0557485	10	10	all	0.0737182	-0.132417	10	10	all	0.168734	-0.098399	10	10	all	0.522103	-0.0389996	10	10	all	0.0526036	-0.0893705	10	10	all	0.154736	-0.0752125	10	10
ALDH1A2	all	0.831186	0.00886855	10	10	all	0.0483735	-0.0227174	10	10	all	0.236374	-0.00855149	10	10	all	0.369098	-0.0795334	10	10	all	0.944524	-0.0609544	10	10	all	0.676215	-0.0702439	10	10	all	0.368781	-0.0603081	10	10	all	0.250055	-0.0599138	10	10	all	0.275058	-0.0601109	10	10
ALDH1A3	all	0.15113	-0.0460385	10	10	all	0.146825	-0.0517996	10	10	all	0.114733	-0.0486202	10	10	all	0.381334	0.0182288	10	10	all	0.501621	0.13893	10	10	all	0.433678	0.0824355	10	10	all	0.471086	-0.0647349	10	10	all	0.681862	0.0306479	10	10	all	0.785636	-0.0479745	10	10
ALDH1B1	all	0.354894	0.00959288	10	10	all	0.918423	0.011265	10	10	all	0.391965	0.0132353	10	10	all	0.177256	0.0544693	10	10	all	0.432754	0.00156541	10	10	all	0.166781	0.0296846	10	10	all	0.0857068	0.0986393	10	10	all	0.351841	0.0402436	10	10	all	0.11766	0.0807641	10	10
ALDH1L1	ENST00000393434.2	0.34998	-0.00656086	10	10	ENST00000393434.2	0.349377	-0.0145173	10	10	ENST00000393434.2	0.239929	-0.0152696	10	10	ENST00000472186.1	0.137221	-0.0565983	10	10	ENST00000472186.1	0.42124	-0.0425785	10	10	ENST00000472186.1	0.2028	-0.0780727	10	10	ENST00000472186.1	0.0801259	-0.0811036	10	10	ENST00000472186.1	0.214728	-0.0385959	10	10	ENST00000472186.1	0.072314	-0.0622873	10	10
ALDH1L2	all	0.952614	-0.00658609	10	10	all	0.898497	-0.00921243	10	10	all	0.86927	-0.00146218	10	10	all	0.787136	0.0204494	10	10	all	0.919539	-0.0255214	10	10	all	0.882877	-0.0129045	10	10	all	0.915473	0.0291278	10	10	all	0.642636	0.0295357	10	10	all	0.903392	-0.00600876	10	10
ALDH2	all	0.637772	-0.0107875	10	10	all	0.670924	0.00167704	10	10	all	0.922036	-0.0149144	10	10	all	0.213791	-0.0398118	10	10	all	0.0580965	-0.109324	10	10	all	0.0688787	-0.0396464	10	10	all	0.192236	-0.0764264	10	10	all	0.108824	-0.0516803	10	10	all	0.118005	-0.0640534	10	10
ALDH3A1	ENST00000444455.1,ENST00000457500.2	0.36184	-0.0249645	10	10	ENST00000444455.1,ENST00000457500.2	0.233132	-0.0176811	10	10	ENST00000444455.1,ENST00000457500.2	0.4419	-0.0279214	10	10	ENST00000444455.1,ENST00000457500.2	0.217142	-0.151094	10	10	ENST00000444455.1,ENST00000457500.2	0.0184332	-0.159424	10	10	ENST00000444455.1,ENST00000457500.2	0.0428206	-0.151258	10	10	ENST00000444455.1,ENST00000457500.2	0.132186	-0.143464	10	10	ENST00000444455.1,ENST00000457500.2	0.0913517	-0.17656	10	10	ENST00000444455.1,ENST00000457500.2	0.105411	-0.173742	10	10
ALDH3A2	all	0.544822	-0.0373731	10	10	all	0.596064	-0.00150879	10	10	all	0.746604	-0.0156345	10	10	all	0.684716	-0.005637	10	10	all	0.51146	0.0204519	10	10	all	0.854725	0.0612084	10	10	all	0.880519	-0.0761332	10	10	all	0.363706	-0.0341782	10	10	all	0.817714	-0.039292	10	10
ALDH3B1	ENST00000539229.1	0.598023	-0.00530208	10	10	ENST00000007633.8	0.766265	0.000445945	10	10	ENST00000539229.1	0.660724	0.00293052	10	10	ENST00000539229.1	0.236158	0.114025	10	10	ENST00000007633.8	0.120563	0.30532	10	10	ENST00000007633.8	0.452112	0.29012	10	10	ENST00000539229.1	0.272728	0.0771435	10	10	ENST00000007633.8	0.0517419	0.235819	10	10	ENST00000007633.8	0.354056	0.231006	10	10
ALDH3B2	ENST00000349015.3	0.106431	-0.0409945	10	10	ENST00000530069.1	0.747661	-0.00669964	10	10	ENST00000349015.3	0.371354	-0.0315665	10	10	ENST00000349015.3	0.652292	0.0931217	10	10	ENST00000530069.1	0.0110905	0.103609	10	10	ENST00000530069.1	0.100764	0.0749322	10	10	ENST00000349015.3	0.383988	-0.0207813	10	10	ENST00000530069.1	0.0126297	0.0898543	10	10	ENST00000530069.1	0.0780739	0.057847	10	10
ALDH4A1	ENST00000290597.5	0.412244	-0.0064043	2	2	ENST00000375341.3	0.197089	0.0081996	2	2	ENST00000375341.3	0.502566	0.00297779	2	2	ENST00000375341.3	0.124042	0.0557305	2	2	ENST00000290597.5	0.0945611	-0.0618157	2	2	ENST00000375341.3	0.096414	0.0557206	2	2	ENST00000375341.3	0.141029	0.0430178	2	2	ENST00000375341.3	0.0799012	0.0600969	2	2	ENST00000375341.3	0.0759933	0.0515573	2	2
ALDH5A1	all	0.262899	0.00370345	10	10	all	0.687102	-0.0105155	10	10	all	0.170617	-0.00335033	10	10	all	0.520591	-0.0283181	10	10	all	0.833315	-0.0482187	10	10	all	0.71005	-0.0759639	10	10	all	0.825155	0.0107086	10	10	all	0.762463	-0.0354242	10	10	all	0.819647	-0.0280134	10	10
ALDH6A1	all	0.723126	-0.0139129	10	10	all	0.201538	0.0108927	10	10	all	0.562425	0.0026614	10	10	all	0.10199	0.0330625	10	10	all	0.552367	-0.0377799	10	10	all	0.765196	-0.00183019	10	10	all	0.18029	-0.0185747	10	10	all	0.771517	-0.0360415	10	10	all	0.52187	0.0169174	10	10
ALDH7A1	all	0.879628	0.000497245	10	10	all	0.979629	-0.00940651	10	10	all	0.675621	0.00664484	10	10	all	0.343752	-0.0260244	10	10	all	0.324462	0.0631684	10	10	all	0.939861	0.0384228	10	10	all	0.472826	-0.0246424	10	10	all	0.321912	0.0683861	10	10	all	0.808765	0.0173257	10	10
ALDH8A1	all	0.781502	-0.00761799	9	9	all	0.0319306	0.0263428	9	9	all	0.0831372	0.0106629	9	9	all	0.928636	-0.0365926	9	9	all	0.688004	0.0138222	9	9	all	0.707323	0.000300823	9	9	all	0.890597	0.00174228	9	9	all	0.226304	0.0415215	9	9	all	0.361313	0.0119127	9	9
ALDH9A1	all	0.348381	0.00430767	10	10	all	0.622245	0.00204072	10	10	all	0.504416	0.00561346	10	10	all	0.700399	-0.0688447	10	10	all	0.119003	-0.0538179	10	10	all	0.651889	-0.0649296	10	10	all	0.562407	-0.0455452	10	10	all	0.163583	-0.0413891	10	10	all	0.860126	-0.0500988	10	10
ALDOA	ENST00000569545.1,ENST00000563060.2	0.0141312	0.0201814	8	8	ENST00000395240.3	0.00864522	-0.0511371	3	3	ENST00000395240.3	0.0049845	-0.0457167	3	3	ENST00000338110.5,ENST00000566897.1	0.108212	0.124441	10	10	ENST00000395240.3	0.0467064	0.0722238	3	3	ENST00000338110.5,ENST00000566897.1	0.0343342	0.0892795	10	10	ENST00000395240.3	0.0120676	-0.103251	3	3	ENST00000338110.5,ENST00000566897.1	0.0142789	0.0708635	10	10	ENST00000338110.5,ENST00000566897.1	0.00417241	0.0709054	10	10
ALDOB	all	0.106836	-0.00792839	10	10	all	0.532914	0.00233189	10	10	all	0.120136	-0.0112868	10	10	all	0.832389	0.0296415	10	10	all	0.532698	0.0603745	10	10	all	0.778011	0.0269899	10	10	all	0.331883	-0.0124606	10	10	all	0.660251	0.0242274	10	10	all	0.717112	-0.0053877	10	10
ALDOC	ENST00000395321.2	0.0910791	0.0176743	8	8	all	0.283483	-0.00635743	2	2	ENST00000395321.2	0.136254	0.00656462	8	8	ENST00000395321.2	0.286494	-0.0818381	8	8	ENST00000226253.4	0.335638	0.0259426	8	8	ENST00000226253.4	0.386325	0.0598788	8	8	ENST00000226253.4	0.216463	0.0520903	8	8	ENST00000226253.4	0.232726	0.0530772	8	8	ENST00000226253.4	0.155955	0.0502992	8	8
ALG1	all	0.0983603	-0.0298406	10	10	all	0.0012897	-0.0407268	10	10	all	0.0119252	-0.0425798	10	10	all	0.238761	0.0572305	10	10	all	0.426645	0.000846416	10	10	all	0.42673	0.0414536	10	10	all	0.530214	0.00969089	10	10	all	0.333125	-0.0651469	10	10	all	0.303551	-0.0221662	10	10
ALG10	all	0.283237	0.00110509	10	10	all	0.370148	0.00845288	10	10	all	0.190824	0.000614843	10	10	all	0.95866	0.0717047	10	10	all	0.615614	0.00850483	10	10	all	0.820942	0.0443063	10	10	all	0.896005	0.0566258	10	10	all	0.509544	-0.0188203	10	10	all	0.675653	-0.000341518	10	10
ALG10B	all	0.269272	0.00492364	8	8	all	0.622937	-0.0168212	8	8	all	0.792703	-0.00607675	8	8	all	0.511123	-0.0107286	8	8	all	0.770132	0.01589	8	8	all	0.743387	-0.0118005	8	8	all	0.787152	-0.00468173	8	8	all	0.386447	-0.00885542	8	8	all	0.353001	0.00564854	8	8
ALG11	all	0.847343	-0.00720271	9	9	all	0.651316	-0.00272599	9	9	all	0.956889	-0.00116317	9	9	all	0.629842	0.0293753	9	9	all	0.990063	0.0291637	9	9	all	0.871132	0.0569709	9	9	all	0.80851	0.039941	9	9	all	0.904017	-0.00164806	9	9	all	0.886552	0.0451367	9	9
ALG12	all	0.152891	-0.0217917	10	10	all	0.2493	-0.0193245	10	10	all	0.0715876	-0.0171413	10	10	all	0.586544	-0.0140725	10	10	all	0.681686	0.0284537	10	10	all	0.973497	0.0280033	10	10	all	0.18256	-0.0217011	10	10	all	0.908254	-0.0160881	10	10	all	0.38579	-0.0169405	10	10
ALG13	all	0.000518276	-0.157887	9	9	all	0.000684291	-0.136321	9	9	all	9.94318e-05	-0.147104	9	9	all	0.223208	0.119701	9	9	all	0.0977306	0.168683	9	9	all	0.160239	0.174337	9	9	all	0.0065595	-0.146383	9	9	all	0.00567098	-0.109768	9	9	all	0.00396827	-0.126685	9	9
ALG14	all	0.00252067	-0.0962201	10	10	all	0.0889558	-0.0911771	10	10	all	0.0354979	-0.0920317	10	10	all	0.0540405	0.136271	10	10	all	0.561781	0.0342953	10	10	all	0.360126	0.108442	10	10	all	0.161135	-0.0461279	10	10	all	0.00654476	-0.13893	10	10	all	0.0112663	-0.106189	10	10
ALG1L	all	0.911216	-0.00887771	10	10	all	0.751602	-0.00424337	10	10	all	0.975147	-0.00966727	10	10	all	0.577242	0.0446581	10	10	all	0.852641	-0.0295155	10	10	all	0.523753	0.0217752	10	10	all	0.838728	0.0425172	10	10	all	0.536991	0.0266495	10	10	all	0.960007	0.0201722	10	10
ALG2	all	0.427209	0.00778143	10	10	all	0.731454	-0.00241144	10	10	all	0.837166	0.00916027	10	10	all	0.817118	0.0287599	10	10	all	0.388384	0.0135133	10	10	all	0.703066	0.0596431	10	10	all	0.342059	0.00519702	10	10	all	0.350674	0.0503285	10	10	all	0.36198	-0.00307622	10	10
ALG3	all	0.522909	0.00486305	8	8	all	0.547944	-0.00521463	8	8	all	0.866306	0.00392758	8	8	all	0.641881	-0.0384473	8	8	all	0.677162	0.0463341	8	8	all	0.908555	-0.0124999	8	8	all	0.890236	-0.0279447	8	8	all	0.923549	0.0415203	8	8	all	0.922701	-0.0172274	8	8
ALG5	all	0.0229365	-0.00458287	10	10	all	0.929101	-0.00470846	10	10	all	0.32176	-0.00725002	10	10	all	0.385344	0.065957	10	10	all	0.0505429	0.230808	10	10	all	0.23701	0.174914	10	10	all	0.51756	-0.0275199	10	10	all	0.0100417	0.0718855	10	10	all	0.25632	0.124947	10	10
ALG6	ENST00000371108.4	0.0967156	-0.0283514	10	10	ENST00000263440.4	0.0262249	-0.0230561	10	10	ENST00000263440.4	0.0512327	-0.0177049	10	10	ENST00000371108.4	0.018394	0.145596	10	10	ENST00000371108.4	0.119889	0.188195	10	10	ENST00000371108.4	0.0354465	0.157028	10	10	ENST00000371108.4	0.0477959	0.0933742	10	10	ENST00000371108.4	0.477478	0.113708	10	10	ENST00000371108.4	0.111276	0.0937523	10	10
ALG8	all	0.149512	0.0092397	10	10	all	0.406227	0.00556268	10	10	all	0.0966101	0.00443768	10	10	all	0.265673	-0.043423	10	10	all	0.801697	0.0628048	10	10	all	0.601907	-0.0304757	10	10	all	0.67607	-0.0316721	10	10	all	0.989593	0.0143721	10	10	all	0.932465	-0.0190338	10	10
ALG9	all	0.369323	0.00719248	10	10	all	0.205757	-0.00977562	10	10	all	0.147074	-0.00541147	10	10	all	0.859785	0.0297826	10	10	all	0.971006	0.0273007	10	10	all	0.856057	-0.00581363	10	10	all	0.617141	-0.0498975	10	10	all	0.861007	0.0262302	10	10	all	0.678465	-0.0295368	10	10
ALK	all	0.288695	-0.0119675	10	10	all	0.0572688	-0.0119789	10	10	all	0.0228268	-0.0148442	10	10	all	0.142361	0.0868942	10	10	all	0.954426	0.0100774	10	10	all	0.555323	0.038817	10	10	all	0.162456	0.0643513	10	10	all	0.976036	0.0200048	10	10	all	0.559342	0.0337846	10	10
ALKBH1	all	0.0152668	-0.0244566	10	10	all	0.19701	-0.0209548	10	10	all	0.0242076	-0.01991	10	10	all	0.157371	0.0961484	9	9	all	0.227094	0.0410695	10	10	all	0.0646492	0.0800621	9	9	all	0.84288	0.0136039	10	10	all	0.347999	-0.00786403	10	10	all	0.505616	0.00286992	10	10
ALKBH2	all	0.373191	0.0100233	10	10	all	0.247356	0.0029446	10	10	all	0.804981	-0.00396449	10	10	all	0.306773	-0.00706777	10	10	all	0.31476	-0.0368561	10	10	all	0.208927	-0.01049	10	10	all	0.845532	-0.0168273	10	10	all	0.257715	-0.0376617	10	10	all	0.401717	-0.0203144	10	10
ALKBH3	all	0.641609	0.00109054	10	10	all	0.237299	0.00330372	10	10	all	0.804193	0.00371878	10	10	all	0.317079	0.0397189	10	10	all	0.852065	-0.0249469	10	10	all	0.583202	0.0163377	10	10	all	0.394534	0.0551372	10	10	all	0.854313	0.0151962	10	10	all	0.518056	0.0159736	10	10
ALKBH4	all	0.0334949	0.00750198	10	10	all	0.51183	0.0178337	10	10	all	0.0422839	0.00504948	10	10	all	0.0164642	-0.0867896	10	10	all	0.0867111	-0.0668475	10	10	all	0.0126001	-0.0647035	10	10	all	0.0923932	-0.0575871	10	10	all	0.23406	-0.0380656	10	10	all	0.0699069	-0.0406862	10	10
ALKBH5	all	0.0391014	-0.059624	10	10	all	0.12887	-0.0467909	10	10	all	0.0639048	-0.0576552	10	10	all	0.465981	-0.0608052	10	10	all	0.970645	-0.0335512	10	10	all	0.746179	-0.0512776	10	10	all	0.126606	-0.174188	10	10	all	0.703067	-0.118214	10	10	all	0.350311	-0.16261	10	10
ALKBH6	all	0.424911	-0.0145199	10	10	all	0.0971016	-0.0233396	10	10	all	0.0820394	-0.0143125	10	10	all	0.266159	-0.0346132	10	10	all	0.777238	-0.0662222	10	10	all	0.735661	-0.0563617	10	10	all	0.189439	-0.0405971	10	10	all	0.616849	-0.0627209	10	10	all	0.39289	-0.0583623	10	10
ALKBH7	all	0.0124635	-0.0542161	10	10	all	0.207768	-0.0609841	10	10	all	0.0411829	-0.0629257	10	10	all	0.815318	0.0729489	10	10	all	0.524488	0.00598796	10	10	all	0.397573	0.0571081	10	10	all	0.0762751	-0.0355613	10	10	all	0.0172022	-0.126471	10	10	all	0.0118159	-0.0854621	10	10
ALKBH8	all	0.0278721	-0.0345863	10	10	all	0.00844935	-0.0258963	10	10	all	0.00407715	-0.0250273	10	10	all	0.0634746	0.0510021	10	10	all	0.11269	0.17303	10	10	all	0.0942448	0.14942	10	10	all	0.786851	0.0355196	10	10	all	0.285875	0.0544035	10	10	all	0.591183	0.0583413	10	10
ALLC	all	0.0240694	0.0146841	10	10	all	0.528581	0.00506673	10	10	all	0.0360054	0.009056	10	10	all	0.0624658	-0.0775263	10	10	all	0.535449	-0.000920733	10	10	all	0.122005	-0.017256	10	10	all	0.28962	-0.0188095	10	10	all	0.760312	-0.00286465	10	10	all	0.305735	0.00112002	10	10
ALMS1	all	0.561569	-0.0155717	10	10	all	0.91645	-0.0406156	10	10	all	0.608045	-0.0243204	10	10	all	0.368465	-0.0919052	10	10	all	0.395763	-0.117679	10	10	all	0.277858	-0.049467	10	10	all	0.121605	-0.0281384	10	10	all	0.0838155	-0.118649	10	10	all	0.0535241	-0.0486322	10	10
ALOX12	all	0.962291	-0.00741554	10	10	all	0.165924	-0.00884175	10	10	all	0.488026	-0.0147286	10	10	all	0.731464	-0.0122833	10	10	all	0.715788	-0.0302431	10	10	all	0.587483	-0.0287258	10	10	all	0.815887	0.0225123	10	10	all	0.774369	-0.0264502	10	10	all	0.970642	-0.0219066	10	10
ALOX12B	all	0.409828	0.00572066	10	10	all	0.464496	-0.00782685	10	10	all	0.254099	-0.00575371	10	10	all	0.209471	0.144589	10	10	all	0.983674	0.110493	10	10	all	0.60538	0.159766	10	10	all	0.0579784	0.0899344	10	10	all	0.829273	0.0991187	10	10	all	0.451198	0.126672	10	10
ALOX15	ENST00000293761.3	0.514312	0.00607757	10	10	ENST00000293761.3	0.379328	-0.0120492	10	10	ENST00000293761.3	0.746604	0.00106661	10	10	ENST00000293761.3	0.00962414	-0.120179	9	9	ENST00000293761.3	0.751239	-0.0185708	10	10	ENST00000293761.3	0.0707272	-0.0651675	9	9	ENST00000293761.3	0.0570434	-0.0923595	10	10	ENST00000570836.1	0.752455	0.0151646	10	10	ENST00000293761.3	0.146517	-0.0596478	10	10
ALOX15B	all	0.383032	-0.0115635	10	10	all	0.968636	0.00787766	10	10	all	0.645961	-0.00300369	10	10	all	0.285074	-0.00301615	10	10	all	0.802615	0.0236735	10	10	all	0.767702	0.0317734	10	10	all	0.432192	-0.0107634	10	10	all	0.905927	0.0184996	10	10	all	0.873736	0.0278375	10	10
ALOX5	all	0.0293463	-0.0173023	10	10	all	0.518395	-0.00236265	10	10	all	0.0601722	-0.00599695	10	10	all	0.0429854	0.139371	10	10	all	0.0361491	0.124822	10	10	all	0.0182163	0.12601	10	10	all	0.195102	0.114551	10	10	all	0.0458686	0.095266	10	10	all	0.0738343	0.0949679	10	10
ALOX5AP	all	0.468102	0.010017	10	10	all	0.678436	0.00310184	10	10	all	0.383207	0.00195374	10	10	all	0.379186	-0.0246983	10	10	all	0.464116	-0.0347991	10	10	all	0.871008	-0.0204872	10	10	all	0.541675	-0.0155874	10	10	all	0.426053	0.0218085	10	10	all	0.933005	-0.0141882	10	10
ALPI	all	0.96148	-0.0275533	10	10	all	0.54918	-0.0289959	10	10	all	0.758881	-0.0270775	10	10	all	0.144837	0.0412357	10	10	all	0.754029	0.0253582	10	10	all	0.260114	0.0205546	10	10	all	0.376901	-0.0373043	10	10	all	0.493835	-0.0240532	10	10	all	0.850189	-0.0306787	10	10
ALPK1	all	0.968604	0.00250881	9	9	all	0.259562	0.0171066	9	9	all	0.298631	0.0120509	9	9	all	0.760659	0.00568193	9	9	all	0.581666	0.0549395	9	9	all	0.682026	-0.00929519	9	9	all	0.784201	-0.0256569	9	9	all	0.304715	0.0610794	9	9	all	0.379845	-0.00554335	9	9
ALPK2	all	0.390469	-0.0136863	10	10	all	0.708882	-0.000508081	10	10	all	0.271888	-0.000172321	10	10	all	0.838966	-0.0130536	10	10	all	0.5066	0.0573191	10	10	all	0.754164	0.0218027	10	10	all	0.797255	-0.00780036	10	10	all	0.59172	0.029436	10	10	all	0.562465	-0.0134151	10	10
ALPK3	all	0.912381	0.00283911	10	10	all	0.723522	-0.00278891	10	10	all	0.973975	-0.00107465	10	10	all	0.65217	0.0304233	10	10	all	0.537535	0.0481769	10	10	all	0.5917	0.0677458	10	10	all	0.747515	0.0284314	10	10	all	0.598526	0.0787687	10	10	all	0.672267	0.0615478	10	10
ALPL	ENST00000374832.1	0.734161	-0.00247798	5	5	ENST00000374832.1	0.132406	0.00764374	5	5	ENST00000374832.1	0.404224	0.00511201	5	5	ENST00000374832.1	0.0555203	-0.0630207	5	5	ENST00000374832.1	0.0767988	-0.0744307	5	5	ENST00000374832.1	0.0213887	-0.0550568	5	5	ENST00000374832.1	0.0294862	-0.0488728	5	5	ENST00000540617.1,ENST00000374840.3	0.152024	0.0517582	10	10	ENST00000374832.1	0.0403829	-0.0400407	5	5
ALPP	all	0.815405	0.00543322	10	10	all	0.508347	0.00345287	10	10	all	0.64653	0.00928515	10	10	all	0.233707	-0.0557297	10	10	all	0.344328	-0.038827	10	10	all	0.217247	-0.0551007	10	10	all	0.277824	-0.038907	10	10	all	0.47374	-0.0259402	10	10	all	0.303444	-0.0406772	10	10
ALPPL2	all	0.0337875	-0.0182027	10	10	all	0.51591	0.0050315	10	10	all	0.409393	-0.0132458	10	10	all	0.122276	0.108718	10	10	all	0.18658	0.11568	10	10	all	0.13858	0.111923	10	10	all	0.472269	0.0834381	10	10	all	0.0759289	0.0838864	10	10	all	0.194461	0.0836622	10	10
ALS2	all	0.249233	-0.00124308	10	10	all	0.350484	-0.0160647	10	10	all	0.1261	-0.00469641	10	10	all	0.891862	0.0130722	10	10	all	0.778842	-0.00686236	10	10	all	0.783658	0.0235801	10	10	all	0.559324	-0.0144572	10	10	all	0.429606	-0.00799594	10	10	all	0.404962	0.021144	10	10
ALS2CL	all	0.987201	0.00558865	10	10	all	0.961341	-0.00469827	10	10	all	0.918625	0.00218941	10	10	all	0.125786	-0.0356802	10	10	all	0.88195	0.0433404	10	10	all	0.286724	-0.00694983	10	10	all	0.111978	-0.0567085	10	10	all	0.915059	0.0288881	10	10	all	0.338484	0.0134589	10	10
ALS2CR12	all	0.0332885	-0.0275551	10	10	all	0.125017	-0.0322993	10	10	all	0.00350201	-0.0214493	10	10	all	0.64149	0.0194228	10	10	all	0.532698	0.0474809	10	10	all	0.226932	0.000802655	10	10	all	0.850931	-0.0523586	10	10	all	0.992837	0.00369097	10	10	all	0.970281	-0.045868	10	10
ALX1	all	0.338028	0.00385408	10	10	all	0.314869	-0.00809715	10	10	all	0.751919	0.00306977	10	10	all	0.310345	0.049527	10	10	all	0.645299	-0.0239577	10	10	all	0.375477	0.0349251	10	10	all	0.242362	0.0579742	10	10	all	0.940722	-0.0173742	10	10	all	0.37883	0.02657	10	10
ALX3	all	0.311126	-0.00891419	10	10	all	0.204586	-0.0164724	10	10	all	0.147737	-0.0140755	10	10	all	0.684799	-0.0831223	10	10	all	0.433749	-0.103959	10	10	all	0.766924	-0.0911555	10	10	all	0.54956	-0.0877459	10	10	all	0.691039	-0.0870214	10	10	all	0.973347	-0.0916056	10	10
ALX4	all	0.145408	0.01339	10	10	all	0.771403	-0.0155842	10	10	all	0.555352	-0.0054458	10	10	all	0.485247	0.0605347	10	10	all	0.510624	0.0252484	10	10	all	0.908934	0.0183684	10	10	all	0.999144	0.0191662	10	10	all	0.72692	0.0125808	10	10	all	0.803863	0.0040074	10	10
ALYREF	all	0.000151972	-0.0518053	10	10	all	0.0345825	-0.0532353	10	10	all	0.000390677	-0.0525203	10	10	all	0.29698	-0.107671	10	10	all	0.0136391	-0.167851	10	10	all	0.0833445	-0.176493	10	10	all	0.00837628	-0.20962	10	10	all	0.000607534	-0.176644	10	10	all	0.00117097	-0.193132	10	10
AMACR	all	0.988057	0.00316026	10	10	all	0.666647	-0.0013352	10	10	all	0.900428	-0.00332623	10	10	all	0.63866	0.0155469	10	10	all	0.780967	0.0262049	10	10	all	0.669111	0.0213853	10	10	all	0.616942	-0.00690498	10	10	all	0.736818	0.0251904	10	10	all	0.600116	0.0347479	10	10
AMBP	all	0.0799214	0.0160361	10	10	all	0.833064	-0.00342916	10	10	all	0.189714	0.00458237	10	10	all	0.409201	-0.0791119	10	10	all	0.836228	-0.000469631	10	10	all	0.682268	-0.0264935	10	10	all	0.89672	-0.0574193	10	10	all	0.702522	0.00991226	10	10	all	0.804126	-0.00656071	10	10
AMBRA1	all	0.75639	-0.00610349	10	10	all	0.668949	-0.00887356	10	10	all	0.860911	-0.000885659	10	10	all	0.956183	0.0230775	10	10	all	0.584562	0.0995318	10	10	all	0.803032	0.0777287	10	10	all	0.921839	0.0231248	10	10	all	0.632637	0.0317099	10	10	all	0.766663	0.021594	10	10
AMD1	all	0.00101053	-0.0868306	10	10	all	0.00010594	-0.0580269	10	10	all	5.19756e-05	-0.0724287	10	10	all	0.000409786	0.485417	10	10	all	4.71094e-05	0.449745	10	10	all	5.79864e-05	0.467581	10	10	all	0.0654792	0.342711	10	10	all	0.0242627	0.327867	10	10	all	0.0334147	0.335289	10	10
AMDHD1	all	0.841424	-0.0143019	9	9	all	0.243151	-0.0155317	9	9	all	0.284616	-0.00411467	9	9	all	0.723061	-0.0301078	9	9	all	0.91482	-0.00426059	9	9	all	0.738523	-0.00315615	9	9	all	0.693309	-0.0481366	9	9	all	0.421979	-0.0264763	9	9	all	0.440052	-0.0305088	9	9
AMDHD2	all	0.574626	-0.00645679	10	10	all	0.66936	0.00339699	10	10	all	0.562883	0.00469047	10	10	all	0.910973	0.0400382	10	10	all	0.809617	0.0406125	10	10	all	0.776189	0.025371	10	10	all	0.482247	0.0124669	10	10	all	0.911745	0.0823982	10	10	all	0.665927	0.0632779	10	10
AMELX	all	0.143705	0.01765	9	9	all	0.407953	-0.00539439	10	10	all	0.744548	0.0138094	9	9	all	0.82332	0.0104479	9	9	all	0.0880189	-0.105013	10	10	all	0.487951	-0.018222	9	9	all	0.334013	0.040982	9	9	all	0.0211822	-0.0693225	10	10	all	0.529376	-0.0209732	9	9
AMER1	all	0.486836	-0.00990634	10	10	all	0.944468	-0.00442135	10	10	all	0.539019	-0.00839287	10	10	all	0.404182	-0.0631618	10	10	all	0.302884	0.0154481	10	10	all	0.963931	-0.0407638	10	10	all	0.177678	-0.0577355	10	10	all	0.404429	0.0109827	10	10	all	0.591105	-0.0520514	10	10
AMER2	ENST00000357816.2	0.16704	-0.00109756	10	10	ENST00000357816.2	0.170159	0.00700364	10	10	ENST00000357816.2	0.568621	-0.00487194	10	10	ENST00000381853.3	0.0366899	0.0934457	10	10	ENST00000381853.3	0.028207	0.0948108	10	10	ENST00000381853.3	0.0104037	0.073618	10	10	ENST00000381853.3	0.0382299	0.0797046	10	10	ENST00000381853.3	0.0385156	0.0467511	10	10	ENST00000381853.3	0.0109185	0.0656856	10	10
AMFR	all	0.644929	0.0080359	10	10	all	0.714523	0.00814348	10	10	all	0.788659	-0.00159522	10	10	all	0.346988	-0.0358738	10	10	all	0.265043	0.130042	10	10	all	0.327428	0.0472934	10	10	all	0.452319	0.0279738	10	10	all	0.237406	0.0669998	10	10	all	0.325969	0.0474868	10	10
AMH	all	0.0708052	-0.0251299	10	10	all	0.79994	-0.0239412	10	10	all	0.528463	-0.0310099	10	10	all	0.0860063	0.105387	10	10	all	0.357463	0.102587	10	10	all	0.164089	0.102034	10	10	all	0.512056	0.0227578	10	10	all	0.63779	0.0179994	10	10	all	0.570349	0.0519948	10	10
AMHR2	all	0.276949	0.0132575	10	10	all	0.623683	-0.00325634	10	10	all	0.714719	0.00547084	10	10	all	0.118123	-0.0714597	10	10	all	0.835875	-0.0150344	10	10	all	0.320157	-0.0243609	10	10	all	0.279704	-0.0206425	10	10	all	0.732862	-0.0165796	10	10	all	0.367965	-0.0122534	10	10
AMICA1	all	0.69221	0.00138436	10	10	all	0.249115	-0.0044903	10	10	all	0.46755	-0.00170352	10	10	all	0.520811	-0.0177724	10	10	all	0.41203	0.0642631	10	10	all	0.373589	0.0210392	10	10	all	0.36818	0.00481608	10	10	all	0.697377	0.0213693	10	10	all	0.468359	0.0153277	10	10
AMIGO1	all	0.80424	-0.00810445	10	10	all	0.973186	0.00552823	10	10	all	0.958471	-0.00581733	10	10	all	0.976685	0.0312522	10	10	all	0.0596257	0.145902	10	10	all	0.230389	0.0942942	10	10	all	0.87197	-0.00793899	10	10	all	0.0541158	0.117524	10	10	all	0.22292	0.0661221	10	10
AMIGO2	ENST00000550413.1,ENST00000321382.3	0.310617	-0.00507362	3	3	ENST00000550413.1,ENST00000321382.3	0.0637387	-0.0105009	3	3	ENST00000550413.1,ENST00000321382.3	0.0654288	-0.00778726	3	3	ENST00000266581.4,ENST00000550413.1,ENST00000321382.3	0.120129	-0.0574823	5	5	ENST00000550413.1,ENST00000321382.3	0.339741	-0.0413881	3	3	ENST00000550413.1,ENST00000321382.3	0.351399	-0.0296066	3	3	ENST00000266581.4,ENST00000550413.1,ENST00000321382.3	0.0628823	-0.0645519	5	5	ENST00000550413.1,ENST00000321382.3	0.31756	-0.0516299	3	3	all	0.306561	0.0282267	2	2
AMIGO3	ENST00000320431.7	0.255695	0.0172437	10	10	ENST00000320431.7	0.923222	0.0118263	10	10	ENST00000320431.7	0.170793	0.0142249	10	10	ENST00000535833.1	0.124742	0.0363617	10	10	ENST00000535833.1	0.223376	0.117987	10	10	ENST00000535833.1	0.196413	0.107044	10	10	ENST00000535833.1	0.198432	0.017829	10	10	ENST00000535833.1	0.341226	0.041928	10	10	ENST00000535833.1	0.228201	0.0321163	10	10
AMMECR1	all	0.788373	-0.00430454	10	10	all	0.580686	0.0110486	10	10	all	0.49708	0.00538105	10	10	all	0.142453	-0.134968	10	10	all	0.111363	-0.0655481	10	10	all	0.146877	-0.141674	10	10	all	0.124556	-0.106813	10	10	all	0.121093	-0.0406884	10	10	all	0.157077	-0.10531	10	10
AMMECR1L	ENST00000272647.5	0.157652	-0.0155283	10	10	ENST00000272647.5	0.273	-0.0147285	10	10	ENST00000272647.5	0.143141	-0.0182658	10	10	ENST00000393001.1	0.285099	-0.14859	10	10	ENST00000272647.5	0.00815604	0.0667808	10	10	ENST00000272647.5	0.0756999	0.0293224	10	10	ENST00000393001.1	0.174752	-0.131796	10	10	ENST00000272647.5	0.0595633	0.120704	10	10	ENST00000393001.1	0.087064	-0.100051	10	10
AMN	all	0.783725	-0.0218001	10	10	all	0.345897	-0.0182588	10	10	all	0.468798	-0.0188569	10	10	all	0.188359	0.0791461	10	10	all	0.0459049	0.0838797	10	10	all	0.0587026	0.0966919	10	10	all	0.4745	0.0266005	10	10	all	0.265585	0.0623736	10	10	all	0.295232	0.044487	10	10
AMN1	all	0.0662764	0.0172226	10	10	all	0.36319	0.0037123	10	10	all	0.0432339	0.0100769	10	10	all	0.790182	-0.021949	10	10	all	0.0345141	-0.129666	10	10	all	0.185432	-0.0926937	10	10	all	0.649963	0.0280057	10	10	all	0.0504448	-0.0913652	10	10	all	0.521135	-0.0688618	10	10
AMOTL1	all	0.515588	-0.000304075	10	10	all	0.902522	-0.00264152	10	10	all	0.942622	-9.80181e-06	10	10	all	0.313184	0.0293033	10	10	all	0.354018	0.142434	10	10	all	0.232906	0.0489972	10	10	all	0.290187	-0.0269807	10	10	all	0.208656	0.10227	10	10	all	0.151292	-0.012909	10	10
AMOTL2	all	0.0728737	-0.02062	9	9	all	0.411593	0.00228859	9	9	all	0.111441	-0.00459242	9	9	all	0.446229	0.0247006	9	9	all	0.892072	0.0242433	9	9	all	0.634808	0.033486	9	9	all	0.985605	-0.0244836	9	9	all	0.955619	0.0337575	9	9	all	0.957226	0.0190602	9	9
AMPD1	all	0.285881	0.0115678	10	10	all	0.326541	0.00612901	10	10	all	0.209356	0.0114983	10	10	all	0.099666	0.0887463	10	10	all	0.828642	-0.00841765	10	10	all	0.207128	0.0170468	10	10	all	0.03833	0.0435705	10	10	all	0.58363	0.00507928	10	10	all	0.105825	0.0213067	10	10
AMPD2	ENST00000256578.3	0.628229	0.00435985	9	9	ENST00000256578.3	0.633146	0.0157394	9	9	ENST00000256578.3	0.513191	0.0107765	9	9	ENST00000342115.4,ENST00000528667.1	0.17731	0.0321314	10	10	ENST00000342115.4,ENST00000528667.1	0.14579	-0.018668	10	10	ENST00000342115.4,ENST00000528667.1	0.0931146	0.00673173	10	10	ENST00000342115.4,ENST00000528667.1	0.14824	0.0196017	10	10	ENST00000342115.4,ENST00000528667.1	0.104871	-0.00955824	10	10	ENST00000342115.4,ENST00000528667.1	0.0595535	0.00371516	10	10
AMPD3	ENST00000529507.1	0.532622	0.00136913	10	10	ENST00000396553.2	0.133164	0.0156068	10	10	ENST00000529507.1	0.393029	-0.00153896	10	10	ENST00000529507.1	0.201179	0.10254	10	10	ENST00000529507.1	0.0653342	0.0980773	10	10	ENST00000529507.1	0.0537151	0.0924256	10	10	ENST00000529507.1	0.23038	0.0909298	10	10	ENST00000529507.1	0.0869129	0.0731478	10	10	ENST00000529507.1	0.0814561	0.0431571	10	10
AMPH	all	0.303897	-0.001255	10	10	all	0.0966811	-0.0273762	10	10	all	0.615819	-0.00782921	10	10	all	0.950059	0.0320422	10	10	all	0.818523	0.0114383	10	10	all	0.720443	0.0616809	10	10	all	0.593285	0.0155047	10	10	all	0.721797	-0.0307342	10	10	all	0.821845	-0.00918725	10	10
AMT	all	0.447137	-0.0120642	10	10	all	0.696519	-0.000395035	10	10	all	0.604727	-0.00795688	10	10	all	0.401829	-0.0430744	10	10	all	0.0398028	-0.0893493	10	10	all	0.095611	-0.0752946	10	10	all	0.163307	-0.0912815	10	10	all	0.0776513	-0.0838974	10	10	all	0.0542983	-0.0460838	10	10
AMY1A	all	0.463611	0.0100067	10	10	all	0.399777	-0.00132569	10	10	all	0.30297	0.00652274	10	10	all	0.519601	-0.0240897	10	10	all	0.276927	0.115253	10	10	all	0.676298	0.0389507	10	10	all	0.772247	0.0186785	10	10	all	0.197123	0.104528	10	10	all	0.436663	0.062859	10	10
AMY2A	all	0.844736	-0.0020988	10	10	all	0.707117	0.0118717	10	10	all	0.769058	0.00564365	10	10	all	0.162187	-0.117832	10	10	all	0.969653	-0.0385396	10	10	all	0.295309	-0.0602686	10	10	all	0.258922	-0.113724	10	10	all	0.997432	-0.0172623	10	10	all	0.475253	-0.052279	10	10
AMY2B	all	0.0239437	-0.036037	7	7	all	0.474911	-0.00616183	6	6	all	0.0902145	-0.0154126	6	6	all	0.621816	-0.0141651	6	6	all	0.0479533	0.112585	6	6	all	0.194132	0.0554143	6	6	all	0.0390722	-0.0741927	7	7	all	0.179302	0.0992126	6	6	all	0.771796	0.00721891	6	6
AMZ1	all	0.437708	-0.0713246	10	10	all	0.333017	-0.0625754	10	10	all	0.344286	-0.0598966	10	10	all	0.519931	0.180995	10	10	all	0.541795	0.232807	10	10	all	0.55783	0.226535	10	10	all	0.53381	-0.0179426	10	10	all	0.604186	0.0791844	10	10	all	0.540182	0.0310222	10	10
AMZ2	ENST00000359904.3	0.256003	-0.0141242	10	10	ENST00000359904.3	0.143054	-0.00336086	10	10	ENST00000359904.3	0.0818209	-0.00841859	10	10	ENST00000577866.1	0.250762	0.0153618	5	5	ENST00000359904.3	0.223978	0.109328	10	10	ENST00000577866.1	0.395762	0.0247806	5	5	ENST00000359904.3	0.230029	-0.0286785	10	10	ENST00000580753.1,ENST00000392720.2	0.251406	0.0381487	10	10	ENST00000577866.1	0.284328	0.0267118	5	5
ANAPC1	all	0.626799	0.00810435	10	10	all	0.83496	-0.000910755	10	10	all	0.879963	0.00658059	10	10	all	0.594701	-0.0198297	10	10	all	0.725604	-0.012972	10	10	all	0.562556	-0.0111161	10	10	all	0.881723	0.00910725	10	10	all	0.736222	0.0299429	10	10	all	0.792774	0.0158087	10	10
ANAPC10	all	0.0468815	-0.0946442	10	10	all	0.00488601	-0.0532277	10	10	all	0.0055164	-0.073703	10	10	all	0.185981	0.0655838	9	9	all	0.911376	-0.0136748	10	10	all	0.30041	0.0538888	9	9	all	0.829821	-0.144267	10	10	all	0.219481	-0.113462	10	10	all	0.479669	-0.126165	10	10
ANAPC11	ENST00000572639.1,ENST00000579978.1,ENST00000344877.5,ENST00000571024.2,ENST00000574924.2,ENST00000572851.2,ENST00000571874.2,ENST00000578550.1,ENST00000577747.1,ENST00000392376.3	0.0471285	-0.012443	3	3	ENST00000575195.2	0.143027	0.0116425	3	3	ENST00000571570.1	0.0893993	0.00648887	3	3	ENST00000572639.1,ENST00000579978.1,ENST00000344877.5,ENST00000571024.2,ENST00000574924.2,ENST00000572851.2,ENST00000571874.2,ENST00000578550.1,ENST00000577747.1,ENST00000392376.3	0.0770583	-0.0820507	3	3	ENST00000571874.2,ENST00000578550.1,ENST00000577747.1,ENST00000392376.3,ENST00000583839.1	0.0552215	-0.0796595	2	2	ENST00000571874.2,ENST00000578550.1,ENST00000577747.1,ENST00000392376.3,ENST00000583839.1	0.0554666	-0.0694711	2	2	ENST00000572639.1,ENST00000579978.1,ENST00000344877.5,ENST00000571024.2,ENST00000574924.2,ENST00000572851.2,ENST00000571874.2,ENST00000578550.1,ENST00000577747.1,ENST00000392376.3	0.037824	-0.0918947	3	3	ENST00000571874.2,ENST00000578550.1,ENST00000577747.1,ENST00000392376.3,ENST00000583839.1	0.0825011	-0.051968	2	2	ENST00000572639.1,ENST00000579978.1,ENST00000344877.5,ENST00000571024.2,ENST00000574924.2,ENST00000572851.2,ENST00000571874.2,ENST00000578550.1,ENST00000577747.1,ENST00000392376.3	0.0418195	-0.0604652	3	3
ANAPC13	ENST00000510994.1,ENST00000354910.5,ENST00000514612.1	5.51543e-05	-0.2233	10	10	ENST00000510994.1,ENST00000354910.5,ENST00000514612.1	0.0697167	-0.199218	10	10	ENST00000510994.1,ENST00000354910.5,ENST00000514612.1	0.00169267	-0.211259	10	10	ENST00000511751.1	0.663947	0.0485792	10	10	ENST00000510994.1,ENST00000354910.5,ENST00000514612.1	0.085183	-0.129295	10	10	ENST00000510994.1,ENST00000354910.5,ENST00000514612.1	0.305345	-0.152329	10	10	ENST00000510994.1,ENST00000354910.5,ENST00000514612.1	0.0181164	-0.511656	10	10	ENST00000510994.1,ENST00000354910.5,ENST00000514612.1	0.0242342	-0.424991	10	10	ENST00000510994.1,ENST00000354910.5,ENST00000514612.1	0.0307402	-0.45655	10	10
ANAPC15	ENST00000543587.1,ENST00000545680.1,ENST00000227618.4,ENST00000535234.1,ENST00000545944.1,ENST00000538393.1,ENST00000535503.1	0.0479806	-0.0187195	10	10	ENST00000542531.1,ENST00000538919.1	0.214993	0.00805099	10	10	ENST00000543587.1,ENST00000545680.1,ENST00000227618.4,ENST00000535234.1,ENST00000545944.1,ENST00000538393.1,ENST00000535503.1	0.253346	-0.0139284	10	10	ENST00000542531.1,ENST00000538919.1	0.43671	0.0367387	10	10	ENST00000543587.1,ENST00000545680.1,ENST00000227618.4,ENST00000535234.1,ENST00000545944.1,ENST00000538393.1,ENST00000535503.1	0.739516	-0.0616202	10	10	ENST00000542531.1,ENST00000538919.1	0.594675	0.0325334	10	10	ENST00000543587.1,ENST00000545680.1,ENST00000227618.4,ENST00000535234.1,ENST00000545944.1,ENST00000538393.1,ENST00000535503.1	0.522434	-0.0100169	10	10	ENST00000542531.1,ENST00000538919.1	0.551119	0.0378949	10	10	ENST00000543587.1,ENST00000545680.1,ENST00000227618.4,ENST00000535234.1,ENST00000545944.1,ENST00000538393.1,ENST00000535503.1	0.664777	-0.044506	10	10
ANAPC16	all	0.402812	-0.0248477	9	9	all	0.549353	0.0071108	9	9	all	0.194397	-0.00679384	9	9	all	0.405762	0.0269277	9	9	all	0.514046	-0.0153932	9	9	all	0.308444	0.0235919	9	9	all	0.320461	-0.044475	9	9	all	0.409903	-0.00835563	9	9	all	0.199761	-0.0192298	9	9
ANAPC2	all	0.00708242	-0.0489952	10	10	all	0.553331	-0.0212273	10	10	all	0.104841	-0.0432037	10	10	all	0.343234	0.000289945	10	10	all	0.314869	-0.0298031	10	10	all	0.238856	-0.0362201	10	10	all	0.632135	-0.0850459	10	10	all	0.461387	-0.0652058	10	10	all	0.82607	-0.074884	10	10
ANAPC4	all	0.00455506	-0.099264	7	7	all	0.0448383	-0.0739946	7	7	all	0.032781	-0.0832751	7	7	all	0.842682	0.124537	6	6	all	0.122202	-0.0694375	5	5	all	0.308533	-0.0805058	5	5	all	0.0672576	-0.202934	8	8	all	0.0082065	-0.190424	7	7	all	0.0108744	-0.196679	7	7
ANAPC5	all	1.53621e-05	-0.126858	10	10	all	8.88919e-06	-0.124293	10	10	all	4.9488e-06	-0.125576	10	10	all	0.821651	-0.0297267	9	9	all	0.607447	-0.242521	10	10	all	0.982531	-0.0357548	9	9	all	0.00159659	-0.2944	10	10	all	0.00520644	-0.391566	10	10	all	0.00233692	-0.338535	10	10
ANAPC7	all	0.0646899	-0.0306447	10	10	all	0.65796	-0.0441043	10	10	all	0.244069	-0.0328088	10	10	all	0.312832	0.079715	10	10	all	0.882173	0.0397862	10	10	all	0.481281	0.0463443	10	10	all	0.989499	-0.0246751	10	10	all	0.491662	-0.0437602	10	10	all	0.851607	-0.0406125	10	10
ANG	ENST00000336811.6	0.634911	0.00590828	10	10	ENST00000336811.6	0.244619	-0.00469081	10	10	ENST00000336811.6	0.780229	0.00237889	10	10	ENST00000397990.4	0.367413	0.0419311	10	10	ENST00000397990.4	0.462496	0.107589	10	10	ENST00000397990.4	0.277457	0.0433371	10	10	ENST00000336811.6	0.339339	0.004825	10	10	ENST00000397990.4	0.330902	0.090521	10	10	ENST00000397990.4	0.285126	0.0710381	10	10
ANGEL1	all	0.95959	-0.0171434	10	10	all	0.0802606	-0.0119988	10	10	all	0.103804	-0.0167022	10	10	all	0.35437	-0.00905659	10	10	all	0.940025	0.0339926	10	10	all	0.854015	-0.0260432	10	10	all	0.281038	-0.0545737	10	10	all	0.49241	-0.0287934	10	10	all	0.332076	-0.056339	10	10
ANGEL2	all	0.360355	-0.00129106	10	10	all	0.0633565	-0.0181279	10	10	all	0.45955	-0.00745639	10	10	all	0.88311	0.0573738	10	10	all	0.353021	0.0182361	10	10	all	0.603564	0.035924	10	10	all	0.700939	0.0351608	10	10	all	0.928868	0.0147935	10	10	all	0.810693	0.0177637	10	10
ANGPT1	all	0.640397	-0.00226877	10	10	all	0.526993	-0.00107994	10	10	all	0.988587	0.0048997	10	10	all	0.939755	0.0685587	10	10	all	0.274462	-0.0298733	10	10	all	0.506218	-0.00236985	10	10	all	0.844206	0.0552666	10	10	all	0.264302	-0.00417048	10	10	all	0.449705	0.0118267	10	10
ANGPT2	all	0.249998	-0.00857173	9	9	all	0.818379	0.00786975	9	9	all	0.495309	-0.00634218	9	9	all	0.467204	-0.0376794	9	9	all	0.31601	-0.0629291	9	9	all	0.276411	-0.0498956	9	9	all	0.13479	-0.0527044	9	9	all	0.373971	-0.0552926	9	9	all	0.12425	-0.0395289	9	9
ANGPTL1	ENST00000234816.2	0.18318	-0.0141225	1	1	all	0.594812	-0.00184831	10	10	ENST00000234816.2	0.26213	-0.00748985	1	1	all	0.611524	-0.0104558	10	10	ENST00000234816.2	0.235953	-0.0620024	1	1	ENST00000234816.2	0.358034	-0.0360808	1	1	ENST00000234816.2	0.366232	-0.0344024	1	1	ENST00000234816.2	0.225291	-0.0507994	1	1	ENST00000234816.2	0.234142	-0.0426009	1	1
ANGPTL3	all	0.650573	-0.0046132	10	10	all	0.74916	0.00240087	10	10	all	0.816993	-0.00243223	10	10	all	0.414806	-0.0276584	10	10	all	0.859607	0.0169934	10	10	all	0.568145	-0.0275433	10	10	all	0.324368	-0.0256356	10	10	all	0.776229	0.0217868	10	10	all	0.538911	-0.0203337	10	10
ANGPTL4	all	0.0569403	-0.0245644	10	10	all	0.313871	0.0146591	9	9	all	0.90932	0.00129908	9	9	all	0.281694	-0.0443193	9	9	all	0.112255	-0.162555	10	10	all	0.0337175	-0.103574	9	9	all	0.0182466	-0.140972	10	10	all	0.090177	-0.0853585	10	10	all	0.00476453	-0.0882483	10	10
ANGPTL6	all	0.512393	-0.0384922	9	9	all	0.543254	0.0045898	9	9	all	0.947775	-0.0153457	9	9	all	0.631197	-0.157276	9	9	all	0.0970806	0.109726	9	9	all	0.701387	-0.0218201	9	9	all	0.593835	-0.11177	9	9	all	0.0598787	0.0839139	9	9	all	0.757188	-0.035591	9	9
ANK1	ENST00000347528.4,ENST00000289734.7,ENST00000379758.2,ENST00000396945.1,ENST00000396942.1,ENST00000352337.4	0.438809	-0.00923101	10	10	ENST00000347528.4,ENST00000289734.7,ENST00000379758.2,ENST00000396945.1,ENST00000396942.1,ENST00000352337.4	0.157875	-0.00838232	10	10	ENST00000347528.4,ENST00000289734.7,ENST00000379758.2,ENST00000396945.1,ENST00000396942.1,ENST00000352337.4	0.12638	-0.00930549	10	10	ENST00000265709.8	0.0890987	0.0978805	9	9	ENST00000347528.4,ENST00000289734.7,ENST00000379758.2,ENST00000396945.1,ENST00000396942.1,ENST00000352337.4	0.0549565	0.103599	10	10	ENST00000347528.4,ENST00000289734.7,ENST00000379758.2,ENST00000396945.1,ENST00000396942.1,ENST00000352337.4	0.158335	0.0886182	10	10	ENST00000265709.8	0.347044	0.0284805	9	9	ENST00000347528.4,ENST00000289734.7,ENST00000379758.2,ENST00000396945.1,ENST00000396942.1,ENST00000352337.4	0.12968	0.0794413	10	10	ENST00000347528.4,ENST00000289734.7,ENST00000379758.2,ENST00000396945.1,ENST00000396942.1,ENST00000352337.4	0.297795	0.0636217	10	10
ANK2	all	0.11085	-0.0165808	9	9	all	0.09789	-0.00706074	9	9	all	0.0570891	-0.00643586	9	9	all	0.344623	0.038532	9	9	all	0.936548	-0.0583393	9	9	all	0.551916	-0.0313079	9	9	all	0.733182	0.0303207	9	9	all	0.966671	-0.0717608	9	9	all	0.763724	-0.0423308	9	9
ANK3	all	0.658688	5.69778e-05	10	10	all	0.47974	0.00718631	10	10	all	0.893628	0.00605611	10	10	all	0.449041	0.00637989	10	10	all	0.303122	-0.00808921	10	10	all	0.255023	0.0054344	10	10	all	0.619729	-0.0124885	10	10	all	0.580533	-0.0104281	10	10	all	0.518129	-0.00866763	10	10
ANKAR	ENST00000313581.4	0.247266	0.00505182	10	10	ENST00000520309.1	0.859161	0.00834121	10	10	ENST00000313581.4	0.614229	0.00790268	10	10	ENST00000313581.4	0.30672	0.0421626	10	10	ENST00000313581.4	0.629317	0.0405477	10	10	ENST00000313581.4	0.466328	0.0319972	10	10	ENST00000313581.4	0.136134	0.0311176	10	10	ENST00000313581.4	0.467178	-0.0393799	10	10	ENST00000313581.4	0.396974	0.082339	10	10
ANKDD1A	all	0.114395	0.0174811	10	10	all	0.808201	-0.00268505	10	10	all	0.49037	0.00901177	10	10	all	0.0112402	-0.112767	10	10	all	0.156524	-0.0984132	10	10	all	0.0265548	-0.0958438	10	10	all	0.0307165	-0.0324502	10	10	all	0.24022	-0.0919774	10	10	all	0.0552396	-0.0760031	10	10
ANKEF1	all	0.067411	-0.0210417	10	10	all	0.0984521	-0.0147316	10	10	all	0.0289503	-0.0168116	10	10	all	0.813782	-0.0678053	10	10	all	0.448228	0.0196597	10	10	all	0.811536	-0.0450729	10	10	all	0.32793	-0.0647319	10	10	all	0.979954	-0.0220069	10	10	all	0.576122	-0.0436447	10	10
ANKFY1	all	0.557805	-0.0066259	10	10	all	0.996304	0.011865	10	10	all	0.372747	-0.00723103	10	10	all	0.547802	-0.0429681	10	10	all	0.884002	-0.0522775	10	10	all	0.657856	-0.0452997	10	10	all	0.653749	0.0255115	10	10	all	0.864247	-0.0347115	10	10	all	0.710617	-0.0265992	10	10
ANKH	all	0.51939	0.000555684	10	10	all	0.973411	-0.00217126	10	10	all	0.576701	0.00312588	10	10	all	0.575352	-0.0885713	10	10	all	0.030596	-0.0624511	10	10	all	0.11527	-0.0673672	10	10	all	0.258232	-0.109804	10	10	all	0.0291535	0.0396766	10	10	all	0.0893202	-0.10255	10	10
ANKHD1	all	0.138059	-0.0239186	10	10	all	0.111445	-0.0176547	10	10	all	0.0214252	-0.0149174	10	10	all	0.728957	0.0480756	10	10	all	0.526258	-0.0315339	10	10	all	0.534421	0.0245084	10	10	all	0.665283	-0.0106198	10	10	all	0.933447	-0.0288445	10	10	all	0.732033	0.0130204	10	10
ANKHD1-EIF4EBP3	all	0.656563	0.00850364	10	10	all	0.510922	0.00126089	10	10	all	0.41203	0.00314501	10	10	all	0.381242	-0.0646209	10	10	all	0.668262	0.0976806	10	10	all	0.824906	0.0442028	10	10	all	0.42455	-0.0593298	10	10	all	0.565047	0.00887557	10	10	all	0.695266	-0.0109279	10	10
ANKIB1	all	0.362242	-0.0722147	9	9	all	0.661688	-0.0297532	9	9	all	0.787672	-0.0509839	9	9	all	0.437739	0.0250894	9	9	all	0.365388	-0.0761849	9	9	all	0.905255	-0.0539205	9	9	all	0.29412	-0.0774381	9	9	all	0.0239323	-0.0962316	9	9	all	0.0818107	-0.058697	9	9
ANKK1	all	0.406147	-0.0139206	10	10	all	0.8696	-0.00417742	10	10	all	0.504922	-0.00593068	10	10	all	0.490744	-0.0275637	10	10	all	0.0495969	-0.103257	10	10	all	0.068517	-0.0646174	10	10	all	0.320941	-0.0327414	10	10	all	0.0419196	-0.0836953	10	10	all	0.0536362	-0.0365888	10	10
ANKLE1	all	0.945913	-0.00337048	10	10	all	0.287466	0.0139782	10	10	all	0.675869	0.00529617	10	10	all	0.956228	-0.0474298	10	10	all	0.382196	0.101663	10	10	all	0.525597	0.0143992	10	10	all	0.850709	-0.03474	10	10	all	0.223579	0.0892912	10	10	all	0.423382	0.0179716	10	10
ANKLE2	all	0.0650424	-0.0174772	10	10	all	0.0862007	-0.0155156	10	10	all	0.0194251	-0.014319	10	10	all	0.336029	-0.032013	10	10	all	0.74289	0.0274723	10	10	all	0.440221	-0.0197649	10	10	all	0.0647881	-0.0660995	10	10	all	0.240876	-0.0158077	10	10	all	0.0693155	-0.0191461	10	10
ANKMY1	all	0.27855	-0.00716297	10	10	all	0.306832	-0.00158987	10	10	all	0.202665	-0.00741816	10	10	all	0.48267	-0.024883	10	10	all	0.00615664	-0.0541917	10	10	all	0.173585	-0.0646009	10	10	all	0.711813	-0.0311385	10	10	all	0.00370734	-0.0585855	10	10	all	0.106829	-0.0615185	10	10
ANKMY2	all	0.364493	0.0199855	10	10	all	0.563281	0.0103916	10	10	all	0.475977	0.0130882	10	10	all	0.183842	0.05704	10	10	all	0.0743768	0.0240475	10	10	all	0.0861242	0.0289169	10	10	all	0.0715308	0.0644509	10	10	all	0.0786826	0.0867328	10	10	all	0.0224114	0.0595845	10	10
ANKRA2	all	0.0201845	-0.0416142	10	10	all	0.309783	-0.0326046	10	10	all	0.0419635	-0.0371094	10	10	all	0.164492	0.0312437	10	10	all	0.131414	0.0231489	10	10	all	0.804345	0.0271963	10	10	all	0.589228	-0.0544445	10	10	all	0.0188017	-0.0388401	10	10	all	0.0922338	-0.0334445	10	10
ANKRD1	all	0.911664	-0.00294921	10	10	all	0.0343127	0.0219429	10	10	all	0.0788103	0.0105618	10	10	all	0.786745	0.0314986	10	10	all	0.214625	0.0497433	10	10	all	0.509555	0.04876	10	10	all	0.777135	0.0300383	10	10	all	0.0382411	0.104312	10	10	all	0.259699	0.0469905	10	10
ANKRD10	all	0.713708	-0.00334569	10	10	all	0.563167	-0.00345016	10	10	all	0.717506	-0.00451516	10	10	all	0.343147	-0.0772186	10	10	all	0.64538	-0.116211	10	10	all	0.519047	-0.0919319	10	10	all	0.318085	-0.0681284	10	10	all	0.587396	-0.0386339	10	10	all	0.453783	-0.0702821	10	10
ANKRD11	ENST00000378330.2	0.159581	0.0115164	5	5	all	0.128826	0.0141181	5	5	all	0.302311	0.00550215	5	5	ENST00000301030.4	0.00435077	0.146304	5	5	ENST00000301030.4	0.00281142	0.161237	5	5	ENST00000301030.4	0.00215581	0.153771	5	5	all	0.0370952	0.307978	5	5	ENST00000301030.4	0.0116309	0.109978	5	5	ENST00000301030.4	0.0235365	0.110188	5	5
ANKRD12	ENST00000400020.3	0.27184	-0.0329429	10	10	ENST00000400020.3	0.109616	-0.0527615	10	10	ENST00000400020.3	0.037286	-0.0428522	10	10	ENST00000383440.2,ENST00000262126.4	0.366902	0.0723184	10	10	ENST00000383440.2,ENST00000262126.4	0.0549351	0.093859	10	10	ENST00000400020.3	0.0700608	0.0441382	10	10	ENST00000383440.2,ENST00000262126.4	0.374223	0.063588	10	10	ENST00000383440.2,ENST00000262126.4	0.107017	0.0765407	10	10	ENST00000383440.2,ENST00000262126.4	0.127291	0.0697435	10	10
ANKRD13A	all	0.419783	-0.002456	10	10	all	0.546734	0.0189427	10	10	all	0.745662	0.00247695	10	10	all	0.133802	-0.11686	10	10	all	0.110502	-0.0273822	10	10	all	0.0355257	-0.070271	10	10	all	0.0557655	-0.0949942	10	10	all	0.238169	0.0258363	10	10	all	0.0440573	-0.0601456	10	10
ANKRD13B	all	0.0493162	0.0182192	10	10	all	0.158842	0.00815924	10	10	all	0.029301	0.015646	10	10	all	0.263809	-0.0404891	10	10	all	0.353989	0.0912543	10	10	all	0.83426	0.0316464	10	10	all	0.58627	0.0229902	10	10	all	0.135747	0.080063	10	10	all	0.651607	0.0392571	10	10
ANKRD13C	all	0.123699	-0.027458	10	10	all	0.834916	-0.00242986	10	10	all	0.178732	-0.0114512	10	10	all	0.865516	0.0577773	10	10	all	0.296012	0.0983789	10	10	all	0.240848	-0.0219574	10	10	all	0.519133	0.0453292	10	10	all	0.242374	0.0541891	10	10	all	0.591417	0.0465257	10	10
ANKRD13D	all	0.651265	0.00231279	10	10	all	0.103202	0.0118578	10	10	all	0.384566	0.00727556	10	10	all	0.741608	-0.0362203	10	10	all	0.519858	0.0274679	10	10	all	0.682933	-0.030729	10	10	all	0.939799	-0.0284131	10	10	all	0.351841	0.0831901	10	10	all	0.579832	0.0182618	10	10
ANKRD16	all	0.939125	-0.00917954	10	10	all	0.553105	-0.0116161	10	10	all	0.64045	-0.00184522	10	10	all	0.748796	0.114812	10	10	all	0.350827	0.0583858	10	10	all	0.654012	0.0702624	10	10	all	0.774884	0.0435339	10	10	all	0.467316	0.0117739	10	10	all	0.894265	0.0276539	10	10
ANKRD17	all	7.02229e-05	-0.057814	10	10	all	2.75584e-05	-0.0527919	10	10	all	1.8132e-06	-0.0540757	10	10	all	2.26351e-06	0.201365	10	10	all	2.74381e-06	0.202494	10	10	all	8.596e-07	0.19223	10	10	all	0.000563573	0.10962	10	10	all	0.000494162	0.119992	10	10	all	0.00012705	0.107365	10	10
ANKRD22	all	0.790156	0.00480986	10	10	all	0.561452	0.00522904	10	10	all	0.554518	0.00725738	10	10	all	0.252131	-0.0742033	10	10	all	0.254621	-0.0856371	10	10	all	0.207822	-0.0712539	10	10	all	0.230446	-0.0148729	10	10	all	0.389451	-0.0334569	10	10	all	0.283499	-0.0578181	10	10
ANKRD23	all	0.81689	0.00465953	8	8	all	0.786499	0.00284018	8	8	all	0.700281	-0.00305513	8	8	all	0.0641163	-0.0721654	8	8	all	0.913228	-0.01046	8	8	all	0.235217	-0.0509367	8	8	all	0.0457078	-0.100309	8	8	all	0.616435	-0.0177373	8	8	all	0.142796	-0.0707772	8	8
ANKRD24	ENST00000600132.1	0.0845736	0.0190844	5	5	ENST00000262970.5	0.109841	-0.0357899	10	10	ENST00000262970.5	0.0429889	-0.0336443	10	10	ENST00000600132.1	0.106518	-0.0638826	5	5	ENST00000600132.1	0.112817	-0.103369	5	5	ENST00000600132.1	0.0732837	-0.0784899	5	5	ENST00000262970.5	0.415628	0.0645803	10	10	ENST00000600132.1	0.140709	-0.0544547	5	5	ENST00000600132.1	0.187745	-0.039303	5	5
ANKRD26	all	0.358864	-0.00558727	9	9	all	0.564789	0.00439678	9	9	all	0.364816	-0.00462425	9	9	all	0.136067	0.0229258	9	9	all	0.0307578	0.0801403	9	9	all	0.0482416	0.0786982	9	9	all	0.186438	-0.035473	9	9	all	0.0311382	0.0573547	9	9	all	0.0747896	0.0551763	9	9
ANKRD27	all	0.61741	-0.0102447	9	9	all	0.896613	-0.00906693	9	9	all	0.636603	-0.0117698	9	9	all	0.862361	0.132793	10	10	all	0.262527	-0.0488012	9	9	all	0.409537	-0.0454397	9	9	all	0.898776	0.089643	10	10	all	0.412037	-0.0718249	9	9	all	0.445862	-0.0582152	9	9
ANKRD28	all	0.756845	-0.0111138	6	6	all	0.643475	0.0112978	6	6	all	0.555115	-0.00326534	6	6	all	0.478797	0.0266508	6	6	all	0.493834	0.0159011	6	6	all	0.433926	0.0212759	6	6	all	0.511675	0.0172754	6	6	all	0.338898	0.0323675	6	6	all	0.36355	0.0248214	6	6
ANKRD30A	all	0.350825	-0.0220769	10	10	all	0.0549067	0.0064666	10	10	all	0.213364	0.00328752	10	10	all	0.976866	0.00682284	10	10	all	0.451619	-0.0298295	10	10	all	0.639457	-0.0230337	10	10	all	0.84562	-0.0287722	10	10	all	0.939374	0.0237963	10	10	all	0.743206	0.0219097	10	10
ANKRD31	all	0.755574	-0.0429741	10	10	all	0.453326	-0.034795	10	10	all	0.932638	-0.0388845	10	10	all	0.162697	0.0610468	10	10	all	0.0147676	0.0787204	10	10	all	0.0328512	0.0948909	10	10	all	0.491555	0.0306267	10	10	all	0.127649	-0.000253064	10	10	all	0.258887	0.0159976	10	10
ANKRD32	all	0.715141	-0.0342283	10	10	all	0.867465	-0.0261295	10	10	all	0.686899	-0.027933	10	10	all	0.693626	-0.0734555	10	10	all	0.608872	-0.0149505	9	9	all	0.784338	-0.0228148	9	9	all	0.520526	-0.115633	10	10	all	0.29085	-0.0743572	10	10	all	0.331681	-0.0841319	10	10
ANKRD33	all	0.182411	0.0215285	10	10	all	0.327824	0.00260646	10	10	all	0.979837	0.00905135	10	10	all	0.971096	0.0328258	10	10	all	0.209163	0.109029	10	10	all	0.477835	0.0858497	10	10	all	0.321382	0.025661	10	10	all	0.235149	0.037869	10	10	all	0.251147	0.0320416	10	10
ANKRD33B	all	0.175723	-0.0168277	10	10	all	0.61802	-0.00695025	10	10	all	0.560291	-0.0118031	10	10	all	0.249356	0.0329334	10	10	all	0.297452	0.0129748	10	10	all	0.965735	0.0189025	10	10	all	0.084866	-0.00920262	10	10	all	0.340367	0.0211297	10	10	all	0.579058	-0.00361015	10	10
ANKRD34A	all	0.603879	-0.00323363	10	10	all	0.515727	0.0091893	10	10	all	0.840878	0.00317456	10	10	all	0.0216192	0.172598	10	10	all	0.364296	0.0522437	10	10	all	0.0537151	0.118213	10	10	all	0.0102522	0.116302	10	10	all	0.350936	0.0888121	10	10	all	0.0380445	0.0957958	10	10
ANKRD34B	all	0.385873	0.00140701	10	10	all	0.993915	-0.00367286	10	10	all	0.556642	0.0015902	10	10	all	0.939171	-0.0302033	10	10	all	0.787005	-0.0414789	10	10	all	0.920248	-0.0352121	10	10	all	0.732076	0.00668379	10	10	all	0.673144	-0.027837	10	10	all	0.977675	0.00303572	10	10
ANKRD35	all	0.043282	0.0142461	10	10	all	0.941905	-0.00321346	10	10	all	0.314143	0.00505642	10	10	all	0.490388	0.0426546	10	10	all	0.502377	0.0345238	10	10	all	0.397447	0.0601565	10	10	all	0.198728	0.0809767	10	10	all	0.70181	0.0294285	10	10	all	0.327307	0.0639696	10	10
ANKRD36	all	0.190374	0.00296043	10	10	all	0.883806	-0.010526	10	10	all	0.665237	0.00386546	10	10	all	0.252646	-0.110636	10	10	all	0.491242	0.0158848	10	10	all	0.393042	-0.00746721	10	10	all	0.372464	-0.0471123	10	10	all	0.433641	-0.0403934	10	10	all	0.455284	-0.0468224	10	10
ANKRD36B	all	0.219016	0.00570558	10	10	all	0.94204	0.0230246	10	10	all	0.259984	0.0125863	10	10	all	0.538729	0.10729	10	10	all	0.628435	-0.00155788	10	10	all	0.514508	0.0801356	10	10	all	0.206514	0.0835291	10	10	all	0.344818	0.0500643	10	10	all	0.256794	0.0813775	10	10
ANKRD37	all	0.927986	-0.0229285	10	10	all	0.759719	-0.0168254	10	10	all	0.861177	-0.0148653	10	10	all	0.0989587	0.00912786	10	10	all	0.0214393	0.122846	10	10	all	0.0335338	0.0355737	10	10	all	0.218804	-0.000392062	10	10	all	0.0695304	0.0864642	10	10	all	0.136807	0.0289007	10	10
ANKRD39	all	0.396419	-0.0584093	10	10	all	0.470206	-0.0592981	10	10	all	0.181635	-0.0543072	10	10	all	0.83433	-0.0475884	10	10	all	0.558508	-0.123338	10	10	all	0.93752	-0.0791334	10	10	all	0.884219	-0.147984	10	10	all	0.574938	-0.185075	10	10	all	0.677224	-0.13625	10	10
ANKRD40	all	0.566224	-0.014115	10	10	all	0.439765	0.00954369	10	10	all	0.840967	-0.00164228	10	10	all	0.0958307	0.107818	10	10	all	0.66079	-0.0232053	10	10	all	0.814346	0.0632491	10	10	all	0.309725	0.0575568	10	10	all	0.830726	-0.0272462	10	10	all	0.719648	0.0462443	10	10
ANKRD42	ENST00000393392.2	0.207449	-0.0220889	10	10	ENST00000393392.2	0.0316589	-0.0256406	10	10	ENST00000393392.2	0.0306444	-0.0224602	10	10	ENST00000393392.2	0.260035	0.0748404	10	10	ENST00000393392.2	0.0613762	0.07955	10	10	ENST00000393392.2	0.0894897	0.0684374	10	10	ENST00000393389.3	0.197291	0.0558095	10	10	ENST00000393392.2	0.531716	0.0295596	10	10	ENST00000393389.3	0.543477	0.0370019	10	10
ANKRD44	ENST00000328737.2	0.226713	-0.0329637	10	10	ENST00000450567.1	0.182292	-0.0128828	10	10	ENST00000328737.2	0.264556	-0.0115769	10	10	ENST00000450567.1	0.227377	0.0786477	10	10	ENST00000328737.2	0.0816657	-0.113313	10	10	ENST00000328737.2	0.280523	-0.084581	10	10	ENST00000328737.2	0.123851	-0.0545034	10	10	ENST00000328737.2	0.302108	-0.10546	10	10	ENST00000328737.2	0.128764	-0.0746279	10	10
ANKRD45	all	0.474814	-0.00892544	10	10	all	0.930089	-0.0109338	10	10	all	0.692981	-0.0094291	10	10	all	0.052377	0.0472591	10	10	all	0.530028	-0.0177766	10	10	all	0.109408	0.0247731	10	10	all	0.0501377	0.0179356	10	10	all	0.719051	0.0155796	10	10	all	0.194305	0.0182005	10	10
ANKRD46	all	0.370077	-0.00629431	10	10	all	0.158091	-0.00434618	10	10	all	0.200867	-0.0117943	10	10	all	0.650256	0.0318872	10	10	all	0.235108	-0.0714946	10	10	all	0.673486	-0.0203533	10	10	all	0.979586	0.0320488	10	10	all	0.142983	-0.0736972	10	10	all	0.377118	-0.019698	10	10
ANKRD49	ENST00000544612.1	0.0155108	-0.047325	10	10	ENST00000544612.1	0.0638406	-0.0206888	10	10	ENST00000544612.1	0.0211072	-0.0386957	10	10	ENST00000544612.1	0.0164922	0.0925453	10	10	ENST00000544612.1	0.835698	-0.0121684	10	10	ENST00000544612.1	0.134024	0.0478369	10	10	ENST00000544612.1	0.719531	0.0200437	10	10	ENST00000544612.1	0.29821	-0.0780591	10	10	ENST00000544612.1	0.758647	-0.0312134	10	10
ANKRD50	all	0.89185	0.00453881	10	10	all	0.47045	0.0140685	10	10	all	0.692647	0.0103542	10	10	all	0.812554	0.00664945	10	10	all	0.290689	-0.0391876	10	10	all	0.38056	-0.0408467	10	10	all	0.918566	0.0120796	10	10	all	0.108674	0.0366217	10	10	all	0.261423	0.0179347	10	10
ANKRD52	all	0.22386	-0.00885452	10	10	all	0.370842	-0.0176264	10	10	all	0.123654	-0.0141265	10	10	all	0.000446655	0.379331	10	10	all	0.000281293	0.397	10	10	all	0.000224263	0.388166	10	10	all	0.000117539	0.277873	10	10	all	0.000136369	0.267981	10	10	all	5.63491e-05	0.272927	10	10
ANKRD54	all	0.689087	-0.011185	10	10	all	0.302785	0.00349982	10	10	all	0.576778	-1.59586e-05	10	10	all	0.547276	-0.0536675	10	10	all	0.91743	0.00197178	10	10	all	0.658511	-0.0347159	10	10	all	0.261385	-0.0332106	10	10	all	0.860297	0.0123036	10	10	all	0.543702	-0.0188286	10	10
ANKRD55	all	0.828191	0.00366081	10	10	all	0.709218	0.00127509	10	10	all	0.992827	0.00286711	10	10	all	0.706103	-0.0179662	10	10	all	0.218112	-0.0228436	10	10	all	0.625441	-0.00868699	10	10	all	0.690127	0.00291097	10	10	all	0.196496	0.0191188	10	10	all	0.603896	0.0148632	10	10
ANKRD6	ENST00000339746.4,ENST00000447838.2	0.142034	0.0141505	10	10	ENST00000339746.4,ENST00000447838.2	0.427523	0.00307443	10	10	ENST00000339746.4,ENST00000447838.2	0.104357	0.004105	10	10	ENST00000339746.4,ENST00000447838.2	0.307255	0.0831677	10	10	ENST00000339746.4,ENST00000447838.2	0.0537029	0.0524408	10	10	ENST00000339746.4,ENST00000447838.2	0.105356	0.0487083	10	10	ENST00000339746.4,ENST00000447838.2	0.139022	0.0873967	10	10	ENST00000339746.4,ENST00000447838.2	0.028187	0.0480725	10	10	ENST00000339746.4,ENST00000447838.2	0.0473528	0.0888481	10	10
ANKRD60	all	0.0100782	-0.0259924	10	10	all	0.22199	-0.0205532	10	10	all	0.015904	-0.0212673	10	10	all	0.686378	-0.0238933	10	10	all	0.547652	-0.0268772	10	10	all	0.684096	-0.0318011	10	10	all	0.0874399	-0.0657058	10	10	all	0.254689	-0.0345236	10	10	all	0.0957176	-0.0353173	10	10
ANKRD63	all	0.586698	0.00743024	10	10	all	0.421364	0.00553223	10	10	all	0.767503	-0.00158125	10	10	all	0.0475464	-0.129398	10	10	all	0.346091	-0.0389334	10	10	all	0.0500586	-0.0550471	10	10	all	0.0378264	-0.114698	10	10	all	0.629345	-0.0336658	10	10	all	0.0715635	-0.0689993	10	10
ANKRD7	all	0.443197	0.00341277	10	10	all	0.265678	0.00458948	10	10	all	0.225026	0.00447118	10	10	all	0.260561	0.0311953	10	10	all	0.803271	0.0238199	10	10	all	0.614499	0.0310046	10	10	all	0.091913	0.022262	10	10	all	0.81158	0.0235877	10	10	all	0.372251	0.0305548	10	10
ANKRD9	ENST00000559651.1	0.428771	-0.0105521	9	9	ENST00000559651.1	0.565716	0.0139008	9	9	ENST00000286918.4,ENST00000560748.1	0.797376	0.00473488	10	10	ENST00000286918.4,ENST00000560748.1	0.572926	-0.0519411	10	10	ENST00000559651.1	0.100094	-0.0353216	9	9	ENST00000559651.1	0.399381	0.0437993	9	9	ENST00000286918.4,ENST00000560748.1	0.594458	0.00887032	10	10	ENST00000559651.1	0.162089	-0.0233771	9	9	ENST00000559651.1	0.373988	0.0400662	9	9
ANKS1A	all	0.161236	-0.0227477	10	10	all	0.801424	0.00348798	10	10	all	0.133985	-0.002241	10	10	all	0.254739	0.0427591	10	10	all	0.996572	0.0401304	10	10	all	0.502244	0.072458	10	10	all	0.665242	0.0235911	10	10	all	0.982431	0.0448658	10	10	all	0.61697	0.0154987	10	10
ANKS1B	all	0.0700332	0.016459	10	10	all	0.95189	0.00388173	10	10	all	0.312407	0.0111378	10	10	all	0.701949	-0.0470385	10	10	all	0.489109	-0.00805774	10	10	all	0.601198	-0.0415552	10	10	all	0.884264	-0.0244942	10	10	all	0.38737	-0.0213436	10	10	all	0.731268	-0.0201892	10	10
ANKS3	all	0.128795	-0.0242803	10	10	all	0.549331	-0.0120096	10	10	all	0.0877432	-0.0145081	10	10	all	0.988184	0.00839852	10	10	all	0.95249	0.00103257	10	10	all	0.894056	-0.000609049	10	10	all	0.482916	-0.0351485	10	10	all	0.777701	-0.0261709	10	10	all	0.561703	-0.0279245	10	10
ANKS6	all	0.277349	-0.0378111	10	10	all	0.999414	-0.00784659	10	10	all	0.428658	-0.0261007	10	10	all	0.491954	0.1306	10	10	all	0.112536	0.0108005	10	10	all	0.307487	0.0772218	10	10	all	0.31218	0.0629315	10	10	all	0.177802	-0.018956	10	10	all	0.191177	0.0329089	10	10
ANKZF1	all	0.9148	0.00571964	10	10	all	0.182237	0.00878681	10	10	all	0.259936	0.00850029	10	10	all	0.465462	-0.0753203	10	10	all	0.103611	-0.0950344	10	10	all	0.170387	-0.0753109	10	10	all	0.438809	-0.0526911	10	10	all	0.30979	-0.0721282	10	10	all	0.291699	-0.0545298	10	10
ANLN	all	0.00686587	-0.0377213	10	10	all	0.00881612	-0.0313706	10	10	all	0.000869215	-0.0335107	10	10	all	0.410036	-0.128898	10	10	all	0.572233	-0.0452919	10	10	all	0.85508	-0.0548984	10	10	all	0.0500848	-0.146926	10	10	all	0.883776	-0.0687964	10	10	all	0.261952	-0.132349	10	10
ANO10	all	0.0912722	0.00308459	10	10	all	0.89881	0.0103421	10	10	all	0.266449	0.00671333	10	10	all	0.488293	0.00505144	10	10	all	0.292422	0.115423	10	10	all	0.200124	0.0730533	10	10	all	0.275554	0.0194451	10	10	all	0.250963	0.139295	10	10	all	0.109861	0.0719758	10	10
ANO3	ENST00000537978.1	0.0656611	-0.0185522	10	10	ENST00000537978.1	0.213534	-0.00614489	10	10	ENST00000537978.1	0.0451276	-0.0144448	10	10	ENST00000537978.1	0.347771	0.0285339	10	10	ENST00000256737.3	0.29929	0.0645777	10	10	ENST00000537978.1	0.423314	0.0281035	10	10	ENST00000256737.3	0.643309	0.0725958	10	10	ENST00000256737.3	0.416792	0.0470278	10	10	ENST00000256737.3	0.353998	0.0214708	10	10
ANO5	all	0.81975	0.00212503	10	10	all	0.73358	-0.00971685	10	10	all	0.735157	-0.0105028	10	10	all	0.248961	0.0834726	10	10	all	0.149985	0.0307363	10	10	all	0.138369	0.0707707	10	10	all	0.230051	0.0220082	10	10	all	0.178366	0.0300616	10	10	all	0.16025	0.0524302	10	10
ANO6	ENST00000441606.2	0.120642	-0.0237462	10	10	ENST00000441606.2	0.335846	0.0113276	10	10	ENST00000423947.3,ENST00000320560.8	0.631416	-0.00904229	10	10	ENST00000423947.3,ENST00000320560.8	0.0659141	0.0653843	10	10	ENST00000423947.3,ENST00000320560.8	0.00908009	0.0798322	10	10	ENST00000423947.3,ENST00000320560.8	0.00834356	0.0630989	10	10	ENST00000423947.3,ENST00000320560.8	0.207001	0.0324187	10	10	ENST00000423947.3,ENST00000320560.8	0.0105906	0.0746089	10	10	ENST00000423947.3,ENST00000320560.8	0.0181094	0.0525814	10	10
ANO7	all	0.809621	0.00572231	10	10	all	0.426866	-0.0100334	10	10	all	0.453737	-0.0019721	10	10	all	0.851134	0.024422	10	10	all	0.409586	-0.00272366	10	10	all	0.763728	-0.00549904	10	10	all	0.736245	0.0158585	10	10	all	0.36308	-0.016988	10	10	all	0.716943	-0.0158928	10	10
ANO8	all	0.774928	-0.00678805	10	10	all	0.95522	0.00442313	10	10	all	0.871051	-0.00514145	10	10	all	0.810274	-0.0355003	10	10	all	0.486061	-0.0225346	10	10	all	0.571295	-0.022628	10	10	all	0.778954	-0.0384966	10	10	all	0.486061	0.0230702	10	10	all	0.575197	-0.026719	10	10
ANO9	all	0.114265	0.0118572	10	10	all	0.95585	-0.00533341	10	10	all	0.300535	0.00372824	10	10	all	0.162323	0.0164058	10	10	all	0.0904883	0.0827091	10	10	all	0.0804223	0.0675138	10	10	all	0.051897	0.0309818	10	10	all	0.124379	0.0758933	10	10	all	0.0426046	0.0639495	10	10
ANP32A	all	0.498124	-0.0041164	10	10	all	0.964448	-0.00240292	10	10	all	0.473949	-0.00467079	10	10	all	0.841927	-0.0143035	10	10	all	0.336626	0.0271482	10	10	all	0.735576	-0.0202552	10	10	all	0.942271	-0.0245332	10	10	all	0.350324	0.016141	10	10	all	0.568431	-0.0224883	10	10
ANP32B	all	0.488536	-0.0121773	10	10	all	0.035378	-0.0275503	10	10	all	0.0889044	-0.022652	10	10	all	0.0314731	0.236384	10	10	all	0.0158494	0.222876	10	10	all	0.0126726	0.220148	10	10	all	0.0124516	0.169224	10	10	all	0.0427109	0.13733	10	10	all	0.0132448	0.146752	10	10
ANP32C	all	0.514567	0.0139893	10	10	all	0.668085	0.0105979	10	10	all	0.342904	0.00409426	10	10	all	0.954066	0.0816597	10	10	all	0.11962	-0.0975167	10	10	all	0.581417	-0.0229425	10	10	all	0.861571	0.102421	10	10	all	0.15789	-0.0854397	10	10	all	0.640323	0.0296458	10	10
ANP32D	all	0.849558	-0.0046665	10	10	all	0.11003	0.0163809	10	10	all	0.39159	0.00372629	10	10	all	0.659398	0.0635332	10	10	all	0.91752	-0.0324087	10	10	all	0.774541	-0.00309484	10	10	all	0.972783	0.0347747	10	10	all	0.687255	-0.0209402	10	10	all	0.894354	0.0276731	10	10
ANP32E	all	0.246229	0.0259124	10	10	all	0.968681	-0.0278161	10	10	all	0.598114	0.00292872	10	10	all	0.612595	-0.172694	10	10	all	0.140521	-0.13688	9	9	all	0.527386	-0.0964279	9	9	all	0.643592	-0.0905957	10	10	all	0.100307	-0.178778	10	10	all	0.674826	-0.16564	10	10
ANPEP	all	0.390096	0.00908404	10	10	all	0.803958	-0.00555642	10	10	all	0.717084	0.00532649	10	10	all	0.521766	0.113788	10	10	all	0.294838	0.0480538	10	10	all	0.550778	0.111425	10	10	all	0.297669	0.0934923	10	10	all	0.299181	0.0399601	10	10	all	0.297953	0.0841459	10	10
ANTXR1	all	0.296492	-0.00794042	10	10	all	0.197206	0.0160282	10	10	all	0.860289	-0.00134917	10	10	all	0.474879	0.0751815	10	10	all	0.229561	0.0418464	10	10	all	0.302311	0.0729954	10	10	all	0.770302	0.0328256	10	10	all	0.0632116	0.0665282	10	10	all	0.233215	0.0371505	10	10
ANTXR2	all	0.684682	0.00594315	10	10	all	0.402375	0.0126996	10	10	all	0.291442	0.0120842	10	10	all	0.125954	0.204312	10	10	all	0.00991656	0.254463	10	10	all	0.0220677	0.229387	10	10	all	0.0544407	0.170789	10	10	all	0.00184352	0.20442	10	10	all	0.00450089	0.187604	10	10
ANXA1	ENST00000257497.6	0.253411	-0.00855865	10	10	ENST00000257497.6	0.307635	0.0113701	10	10	ENST00000376911.1	0.752348	-0.00016304	10	10	ENST00000376911.1	0.428258	0.00870743	10	10	ENST00000376911.1	0.173814	-0.108974	10	10	ENST00000376911.1	0.198499	-0.0416886	10	10	ENST00000376911.1	0.550804	0.0127466	10	10	ENST00000376911.1	0.142291	-0.0930181	10	10	ENST00000376911.1	0.226981	-0.0392828	10	10
ANXA10	all	0.193806	-0.00020221	8	8	all	0.0823597	-0.0204718	8	8	all	0.109736	-0.00877817	8	8	all	0.673513	0.0528829	8	8	all	0.963198	0.0303954	8	8	all	0.642057	0.0287905	8	8	all	0.596871	0.0251813	8	8	all	0.479265	-0.0235878	8	8	all	0.881261	-0.0291565	8	8
ANXA11	ENST00000535999.1	0.815142	0.00928809	10	10	ENST00000535999.1	0.03165	-0.0147364	10	10	ENST00000535999.1	0.289842	-0.0102432	10	10	ENST00000372231.3,ENST00000438331.1,ENST00000422982.3,ENST00000360615.4,ENST00000265447.4,ENST00000537102.1	0.12726	-0.0885526	10	10	ENST00000372231.3,ENST00000438331.1,ENST00000422982.3,ENST00000360615.4,ENST00000265447.4,ENST00000537102.1	0.0559363	-0.104989	10	10	ENST00000372231.3,ENST00000438331.1,ENST00000422982.3,ENST00000360615.4,ENST00000265447.4,ENST00000537102.1	0.0701834	-0.122214	10	10	ENST00000372231.3,ENST00000438331.1,ENST00000422982.3,ENST00000360615.4,ENST00000265447.4,ENST00000537102.1	0.0912506	-0.109859	10	10	ENST00000372231.3,ENST00000438331.1,ENST00000422982.3,ENST00000360615.4,ENST00000265447.4,ENST00000537102.1	0.154102	-0.121439	10	10	ENST00000372231.3,ENST00000438331.1,ENST00000422982.3,ENST00000360615.4,ENST00000265447.4,ENST00000537102.1	0.101694	-0.115649	10	10
ANXA2	all	0.455861	-0.00925025	10	10	all	0.221584	0.00378035	10	10	all	0.639075	-0.00610856	10	10	all	0.485389	-0.0295663	10	10	all	0.349399	-0.0452975	10	10	all	0.295309	-0.0293864	10	10	all	0.198827	-0.0187955	10	10	all	0.476988	-0.0178118	10	10	all	0.224598	-0.0136137	10	10
ANXA2R	all	0.130669	0.023017	10	10	all	0.625123	0.0020699	10	10	all	0.14274	0.0115186	10	10	all	0.265746	0.060135	10	10	all	0.408399	0.0437917	10	10	all	0.197238	0.0260925	10	10	all	0.0842245	0.0841541	10	10	all	0.444057	0.0897454	10	10	all	0.111963	0.0643436	10	10
ANXA3	all	0.46575	0.00338107	10	10	all	0.705983	-0.0045852	10	10	all	0.499375	0.00193827	10	10	all	0.291697	-0.0408443	10	10	all	0.516417	-0.0290143	10	10	all	0.34761	-0.0346643	10	10	all	0.375378	-0.0268676	10	10	all	0.630268	-0.0420205	10	10	all	0.42831	-0.0252896	10	10
ANXA4	all	0.0450544	-0.025393	10	10	all	0.830376	-0.0029931	10	10	all	0.186452	-0.0168106	10	10	all	0.979391	-0.00613045	10	10	all	0.910704	-0.0608202	10	10	all	0.909741	-0.0341671	10	10	all	0.494548	-0.0326552	10	10	all	0.940048	-0.0569094	10	10	all	0.888634	-0.0533123	10	10
ANXA5	all	0.11795	-0.0149369	10	10	all	0.36822	-0.0193283	10	10	all	0.0566075	-0.0111871	10	10	all	0.492275	-0.0305723	10	10	all	0.0955718	0.0529689	10	10	all	0.201479	0.0211003	10	10	all	0.864013	-0.0310343	10	10	all	0.293514	0.0445036	10	10	all	0.506773	-0.0181634	10	10
ANXA6	all	0.599946	-0.00943824	10	10	all	0.711532	-0.00910734	10	10	all	0.575003	-0.0140475	10	10	all	0.480663	0.0136569	10	10	all	0.198345	-0.138035	10	10	all	0.531595	-0.0823881	10	10	all	0.89194	-0.00899777	10	10	all	0.19379	-0.124024	10	10	all	0.315119	-0.0665109	10	10
ANXA7	all	0.69371	0.00417398	10	10	all	0.76756	-0.00377596	10	10	all	0.978575	-0.00213885	10	10	all	0.586622	-0.0142106	10	10	all	0.325351	0.0435704	10	10	all	0.777403	-0.00839812	10	10	all	0.694962	-0.0105517	10	10	all	0.491805	0.0468041	10	10	all	0.926175	0.0409155	10	10
ANXA8	all	0.493906	0.0124654	10	10	all	0.783616	-0.000726637	10	10	all	0.531351	0.000840213	10	10	all	0.751711	-0.0630521	10	10	all	0.202758	-0.114922	10	10	all	0.335714	-0.0553601	10	10	all	0.967243	-0.0395502	10	10	all	0.212607	-0.0997513	10	10	all	0.401908	-0.0728542	10	10
ANXA9	all	0.196214	0.0196814	10	10	all	0.216795	0.00714671	10	10	all	0.05845	0.0125423	10	10	all	0.60634	-0.0391391	10	10	all	0.808785	-0.0439372	10	10	all	0.689759	-0.0297721	10	10	all	0.79207	-0.0252351	10	10	all	0.701727	0.0102528	10	10	all	0.732289	0.00735437	10	10
AOAH	all	0.223624	0.0069522	10	10	all	0.433138	0.014262	10	10	all	0.227455	0.0115752	10	10	all	0.60982	-0.0789841	10	10	all	0.879899	-0.0228704	10	10	all	0.851085	-0.0201154	10	10	all	0.902085	-0.0330314	10	10	all	0.722051	-0.00589914	10	10	all	0.885865	-0.00515511	10	10
AOC2	all	0.556174	0.00779588	10	10	all	0.265314	0.0155406	10	10	all	0.180713	0.00967458	10	10	all	0.669414	0.0279619	10	10	all	0.102548	-0.136037	10	10	all	0.17074	-0.083812	10	10	all	0.873928	0.0351768	10	10	all	0.142107	-0.0873086	10	10	all	0.393329	-0.0671175	10	10
AOC3	all	0.514348	-0.00507766	10	10	all	0.984135	0.0200588	10	10	all	0.665895	0.00716002	10	10	all	0.576008	0.0226399	10	10	all	0.297111	-0.0627654	10	10	all	0.813204	-0.0234642	10	10	all	0.806557	0.0200628	10	10	all	0.563559	-0.054143	10	10	all	0.957574	-0.0267117	10	10
AOX1	all	0.678556	0.0122148	9	9	all	0.51912	-0.00488809	9	9	all	0.933359	0.0107634	9	9	all	0.793222	-0.0357894	9	9	all	0.300897	0.0800494	9	9	all	0.611939	0.0106926	9	9	all	0.807864	-0.0157062	9	9	all	0.33828	0.0224373	9	9	all	0.538939	0.0188883	9	9
AP1AR	all	0.707565	-0.00961116	10	10	all	0.349232	0.00578032	10	10	all	0.340206	0.000268921	10	10	all	0.864361	0.0463928	10	10	all	0.590441	-0.0433794	10	10	all	0.788446	0.0365928	10	10	all	0.846682	0.0183654	10	10	all	0.670261	0.0165534	10	10	all	0.737911	0.0144168	10	10
AP1B1	ENST00000432560.2	0.091815	-0.0183273	10	10	ENST00000415447.1	0.683138	-0.0111807	8	8	ENST00000432560.2	0.108275	-0.0111316	10	10	ENST00000432560.2	0.273371	0.039273	10	10	ENST00000415447.1	0.143355	0.0758979	8	8	ENST00000415447.1	0.574268	0.03787	8	8	ENST00000432560.2	0.524419	0.00854209	10	10	ENST00000415447.1	0.159068	0.0459165	8	8	ENST00000415447.1	0.572378	0.0247794	8	8
AP1G1	all	0.156459	0.00805186	10	10	all	0.760192	0.00596621	10	10	all	0.270362	0.00630142	10	10	all	0.890611	-0.023717	10	10	all	0.199293	-0.044225	10	10	all	0.465013	-0.0758777	10	10	all	0.616385	0.0205184	10	10	all	0.267627	-0.0317068	10	10	all	0.805788	-0.0273323	10	10
AP1G2	ENST00000308724.5	0.573052	-0.00333448	4	4	ENST00000308724.5	0.21481	0.00645625	4	4	all	0.358494	-0.00411543	5	5	all	0.404231	-0.0664423	5	5	ENST00000397120.3	0.144023	-0.046658	4	4	ENST00000397120.3	0.278703	-0.0313239	4	4	all	0.0849055	-0.0509655	5	5	ENST00000397120.3	0.377264	-0.0132419	4	4	all	0.197409	-0.0339614	5	5
AP1M1	all	0.31814	0.00570132	10	10	all	0.299642	0.00432854	10	10	all	0.197072	0.00963527	10	10	all	0.436343	-0.0411622	10	10	all	0.285303	-0.0777629	10	10	all	0.325586	-0.0453487	10	10	all	0.720715	-0.0340597	10	10	all	0.520294	-0.0611795	10	10	all	0.646482	-0.0363707	10	10
AP1M2	all	0.0907536	-0.0309219	10	10	all	0.0166589	-0.0444024	10	10	all	0.0324138	-0.0376622	10	10	all	0.590441	0.14954	10	10	all	0.913887	0.12538	10	10	all	0.903911	0.142425	10	10	all	0.813958	0.0744255	10	10	all	0.315391	-0.000265194	10	10	all	0.301959	0.0418002	10	10
AP1S1	all	0.870769	-0.00377694	10	10	all	0.855701	-0.0162609	10	10	all	0.686732	-0.00202598	10	10	all	0.244029	-0.038181	10	10	all	0.962714	0.0285727	10	10	all	0.535539	-0.0480786	10	10	all	0.323536	-0.0461289	10	10	all	0.914611	-0.0416571	10	10	all	0.577744	-0.0441356	10	10
AP1S2	all	0.45737	-0.0153092	9	9	all	0.111522	-0.0119594	9	9	all	0.528202	-0.0108548	9	9	all	0.0726195	-0.108568	9	9	all	0.894475	-0.0867162	9	9	all	0.392872	-0.11975	9	9	all	0.149233	-0.108261	9	9	all	0.56318	-0.0799328	9	9	all	0.317891	-0.109315	9	9
AP1S3	all	0.539321	0.00863564	10	10	all	0.435729	-0.01254	10	10	all	0.955408	-0.000224346	10	10	all	0.40202	-0.0326699	10	10	all	0.665631	0.0268183	10	10	all	0.488215	-0.019558	10	10	all	0.767842	-0.029744	10	10	all	0.527243	-0.0218586	10	10	all	0.517544	-0.0177842	10	10
AP2A1	all	0.413335	0.00223971	10	10	all	0.214617	-0.00892417	10	10	all	0.750889	-0.000187685	10	10	all	0.00101765	0.0206251	10	10	all	0.00612601	0.0303476	10	10	all	0.000666405	0.0159049	10	10	all	0.000318002	0.0157559	10	10	all	0.012257	0.000998623	10	10	all	0.000338907	0.000106677	10	10
AP2A2	all	0.704669	0.00722013	10	10	all	0.650295	-0.00146059	10	10	all	0.717929	0.0049092	10	10	all	0.0153526	0.144635	10	10	all	0.036109	0.14563	10	10	all	0.0217671	0.143934	10	10	all	0.0263817	0.130557	10	10	all	0.0400445	0.0609368	10	10	all	0.0273139	0.120482	10	10
AP2B1	all	0.052088	0.0189903	10	10	all	0.2769	0.00807628	10	10	all	0.0541744	0.0146026	10	10	all	0.0981404	0.0446656	10	10	all	0.0838791	-0.113027	10	10	all	0.0246631	-0.0162829	10	10	all	0.293704	0.0538656	10	10	all	0.138748	-0.0429579	10	10	all	0.143646	-0.00977696	10	10
AP2M1	ENST00000382456.3	0.321492	-0.0930312	10	10	ENST00000382456.3	0.0066669	-0.0272923	9	9	ENST00000382456.3	0.0370905	-0.0162594	9	9	ENST00000382456.3	0.15816	0.0690487	9	9	ENST00000382456.3	0.0419471	0.141081	9	9	ENST00000382456.3	0.0545438	0.11857	9	9	ENST00000382456.3	0.408161	-0.135212	10	10	ENST00000439647.1	0.064833	0.00393658	10	10	ENST00000439647.1	0.155689	0.0347383	10	10
AP2S1	all	0.550729	-0.11167	10	10	all	0.0215072	-0.10236	10	10	all	0.172494	-0.107015	10	10	all	0.994818	-0.0324538	9	9	all	0.553964	0.00604293	9	9	all	0.581566	-0.0263308	9	9	all	0.782336	-0.125572	10	10	all	0.6021	-0.121718	10	10	all	0.76934	-0.129072	10	10
AP3B1	all	0.868501	-0.016564	10	10	all	0.962782	0.00809165	10	10	all	0.653938	-0.00818581	10	10	all	0.676552	-0.0213481	10	10	all	0.035358	-0.0838802	10	10	all	0.273074	-0.0526142	10	10	all	0.920852	-0.0145158	10	10	all	0.0266633	-0.0539758	10	10	all	0.183201	-0.0239981	10	10
AP3B2	all	0.0567712	-0.0118907	10	10	all	0.0571063	0.0169016	10	10	all	0.893628	0.00241366	10	10	all	0.996347	0.0248496	10	10	all	0.927979	-0.0166686	10	10	all	0.955542	0.0255709	10	10	all	0.455281	-0.0211806	10	10	all	0.339025	0.0215338	10	10	all	0.907961	0.0165289	10	10
AP3D1	all	0.372646	-0.00621703	10	10	all	0.691138	0.00414894	10	10	all	0.579328	0.00467025	10	10	all	0.457381	0.04879	10	10	all	0.531733	0.019544	10	10	all	0.502027	0.0258386	10	10	all	0.318633	0.0461984	10	10	all	0.381813	0.00984221	10	10	all	0.430687	0.0325753	10	10
AP3M1	ENST00000372745.1	0.106195	-0.0252037	1	1	ENST00000372745.1	0.0999308	-0.0278028	1	1	ENST00000372745.1	0.0934809	-0.0265033	1	1	ENST00000372745.1	0.105982	0.130934	1	1	ENST00000372745.1	0.172567	0.083499	1	1	ENST00000372745.1	0.110417	0.107216	1	1	all	0.0578369	-0.0934544	9	9	ENST00000355264.4	0.237832	-0.0487151	1	1	all	0.0877074	-0.0720124	9	9
AP3M2	all	0.0601174	0.0156544	10	10	all	0.157012	0.00691564	10	10	all	0.0323498	0.01417	10	10	all	0.484223	-0.142658	10	10	all	0.367022	-0.0550864	10	10	all	0.381052	-0.0735428	10	10	all	0.716997	-0.0533665	10	10	all	0.497657	-0.019042	10	10	all	0.582932	-0.034712	10	10
AP3S1	all	0.679253	0.00242362	10	10	all	0.766395	0.0118643	10	10	all	0.958651	0.00451034	10	10	all	0.6406	-0.0300091	10	10	all	0.666823	-0.0391388	10	10	all	0.680276	-0.0383846	10	10	all	0.485669	-0.0262347	10	10	all	0.820437	-0.0249271	10	10	all	0.616094	-0.0255809	10	10
AP3S2	all	0.098798	0.0288949	10	10	all	0.842112	-0.00221528	10	10	all	0.186565	0.0131313	10	10	all	0.749653	0.0112549	10	10	all	0.747082	0.040143	10	10	all	0.976205	0.0286988	10	10	all	0.426979	0.024997	10	10	all	0.711421	0.0248706	10	10	all	0.515789	0.0265662	10	10
AP4B1	all	0.456686	0.000560551	9	9	all	0.188186	-0.00961879	9	9	all	0.329794	-0.00620849	9	9	all	0.962311	-0.0435269	9	9	all	0.113661	0.158715	9	9	all	0.486529	0.106718	9	9	all	0.719418	-0.00394534	9	9	all	0.18268	0.107706	9	9	all	0.592047	0.0811749	9	9
AP4E1	all	0.341542	-0.0118323	10	10	all	0.842245	0.00449538	10	10	all	0.731751	-0.00723175	10	10	all	0.222646	-0.021529	10	10	all	0.0892468	-0.100891	10	10	all	0.103279	-0.0378624	10	10	all	0.099713	-0.0722435	10	10	all	0.118274	-0.0801886	10	10	all	0.0668562	-0.0674483	10	10
AP4M1	all	0.848142	0.00733052	10	10	all	0.486543	-0.00481616	10	10	all	0.541337	0.00486214	10	10	all	0.242842	-0.0566266	10	10	all	0.159269	-0.0263517	10	10	all	0.108882	0.00586397	10	10	all	0.182931	-0.0672375	10	10	all	0.08254	0.0281549	10	10	all	0.0703619	-0.0235667	10	10
AP4S1	all	0.381309	-0.0281755	10	10	all	0.753189	-0.00460884	10	10	all	0.616456	-0.0106742	10	10	all	0.792882	0.0563953	10	10	all	0.490744	0.0243683	10	10	all	0.575534	0.0458885	10	10	all	0.813607	0.0128402	10	10	all	0.628664	0.0379376	10	10	all	0.705738	0.0243516	10	10
AP5B1	all	0.39932	-0.00194795	10	10	all	0.843615	-0.0102258	10	10	all	0.484062	-0.00426326	10	10	all	0.8271	-0.0237997	10	10	all	0.650419	-0.0490144	10	10	all	0.778879	-0.0416142	10	10	all	0.811285	-0.033393	10	10	all	0.540011	-0.0691396	10	10	all	0.653889	-0.0403048	10	10
AP5M1	all	0.727569	0.000994322	7	7	all	0.0299761	-0.0179747	7	7	all	0.0488256	-0.0095204	7	7	all	0.520116	0.0146952	7	7	all	0.482244	0.0840988	7	7	all	0.502247	0.0897553	7	7	all	0.535427	0.00729335	7	7	all	0.901749	0.050414	7	7	all	0.718391	0.0324311	7	7
AP5S1	all	0.841819	-0.021691	10	10	all	0.781577	-0.0108707	10	10	all	0.726144	-0.00588525	10	10	all	0.115748	0.0621137	10	10	all	0.490317	-0.0555007	10	10	all	0.621518	0.0198987	10	10	all	0.157552	0.0302288	10	10	all	0.334029	-0.0789921	10	10	all	0.761057	0.00331099	10	10
AP5Z1	all	0.201226	0.00284842	10	10	all	0.307367	0.00423356	10	10	all	0.174029	0.00395994	10	10	all	0.573618	-0.0593332	10	10	all	0.691915	0.0572227	10	10	all	0.902656	-0.000165707	10	10	all	0.749056	-0.0375823	10	10	all	0.490916	0.0590974	10	10	all	0.868483	0.00927926	10	10
APAF1	ENST00000550527.1	0.527405	0.00569044	10	10	ENST00000551964.1	0.13073	0.0140014	10	10	ENST00000551964.1	0.157266	0.00384437	10	10	ENST00000550527.1	0.356548	-0.137841	10	10	ENST00000551964.1	0.749353	0.0341543	10	10	ENST00000550527.1	0.66804	-0.0662972	10	10	ENST00000550527.1	0.370046	-0.107487	10	10	ENST00000550527.1	0.731672	-0.0340537	10	10	ENST00000551964.1	0.50786	0.023254	10	10
APBA1	all	0.720461	-0.0124209	10	10	all	0.104149	-0.0158874	10	10	all	0.122418	-0.00826983	10	10	all	0.147205	0.0883931	10	10	all	0.916937	0.0150554	10	10	all	0.399217	0.0513448	10	10	all	0.283642	0.0731481	10	10	all	0.533533	-0.00910326	10	10	all	0.797484	0.0305132	10	10
APBA2	ENST00000561069.1	0.00898862	-0.0196762	9	9	ENST00000558402.1	0.12028	-0.0120034	10	10	ENST00000558402.1	0.120379	-0.0079229	10	10	ENST00000558402.1	0.0510248	0.066647	10	10	ENST00000558259.1	0.15181	0.0563339	5	5	ENST00000558402.1	0.127	0.0588337	10	10	ENST00000558402.1	0.0893502	0.0579515	10	10	ENST00000558259.1	0.260287	0.0406294	5	5	ENST00000558259.1	0.219555	0.0209374	5	5
APBA3	all	0.115435	0.011182	10	10	all	0.53336	0.0043268	10	10	all	0.120676	0.0128258	10	10	all	0.0572553	-0.0142151	10	10	all	0.258698	-0.0329118	10	10	all	0.115035	-0.0618241	10	10	all	0.315409	-0.00729138	10	10	all	0.456729	-0.052739	10	10	all	0.331175	-0.0393484	10	10
APBB1	all	0.793812	-0.00640318	10	10	all	0.176545	-0.00384034	10	10	all	0.266742	0.00183645	10	10	all	0.46522	0.031527	10	10	all	0.523973	-0.037567	10	10	all	0.478959	0.0227448	10	10	all	0.636562	0.0233573	10	10	all	0.905793	-0.0243217	10	10	all	0.770291	0.0147304	10	10
APBB1IP	all	0.33513	-0.018216	10	10	all	0.174045	-0.0251995	10	10	all	0.198291	-0.0245942	10	10	all	0.431164	0.0413072	10	10	all	0.84038	0.0468051	10	10	all	0.530408	0.0359893	10	10	all	0.630127	0.00077474	10	10	all	0.678593	-0.0172777	10	10	all	0.917197	-0.0269763	10	10
APBB2	all	0.138917	-0.0167462	10	10	all	0.659186	0.00704598	10	10	all	0.700005	-0.00784578	10	10	all	0.660585	0.104337	10	10	all	0.0331894	-0.0438916	10	10	all	0.440757	0.0364741	10	10	all	0.893637	0.0719383	10	10	all	0.0424515	-0.0259723	10	10	all	0.395023	0.0235834	10	10
APBB3	all	0.509405	-0.00917657	10	10	all	0.0925566	-0.0221522	10	10	all	0.765258	-0.0142174	10	10	all	0.0478449	0.122024	10	10	all	0.554827	0.0679228	10	10	all	0.156771	0.109689	10	10	all	0.017842	0.100935	10	10	all	0.906464	0.0194309	10	10	all	0.136331	0.067213	10	10
APC	ENST00000257430.4,ENST00000508376.2	0.149305	0.00669389	10	10	ENST00000257430.4,ENST00000508376.2	0.571165	0.00518008	10	10	ENST00000257430.4,ENST00000508376.2	0.16949	0.00957921	10	10	ENST00000257430.4,ENST00000508376.2	0.484647	-0.0498565	10	10	ENST00000257430.4,ENST00000508376.2	0.357345	0.000575246	10	10	ENST00000457016.1	0.694937	-0.0365432	10	10	ENST00000257430.4,ENST00000508376.2	0.853633	-0.0197055	10	10	ENST00000257430.4,ENST00000508376.2	0.27125	0.0093204	10	10	ENST00000257430.4,ENST00000508376.2	0.542353	-0.00185048	10	10
APC2	ENST00000233607.2	0.585144	-0.0196399	10	10	ENST00000233607.2	0.216921	0.00400746	10	10	ENST00000233607.2	0.909655	0.000380599	10	10	ENST00000233607.2	0.167603	-0.0164204	10	10	ENST00000535453.1	0.748324	0.0359062	10	10	ENST00000233607.2	0.382716	-0.000743635	10	10	ENST00000233607.2	0.133	-0.0246996	10	10	ENST00000233607.2	0.715759	0.0321513	10	10	ENST00000233607.2	0.418683	-0.00448597	10	10
APCDD1L	all	0.249674	0.0156553	10	10	all	0.10944	-0.020453	10	10	all	0.573154	-0.00426251	10	10	all	0.917206	-0.0223359	10	10	all	0.916802	-0.0300599	10	10	all	0.978733	-0.0627626	10	10	all	0.5992	-0.0135184	10	10	all	0.528277	-0.0645698	10	10	all	0.927613	-0.0338604	10	10
APCS	all	0.451266	0.00721625	10	10	all	0.857076	-0.0039183	10	10	all	0.652062	0.00315361	10	10	all	0.530398	0.0531799	10	10	all	0.966814	-0.0527953	10	10	all	0.816983	-0.0249201	10	10	all	0.375621	0.0603336	10	10	all	0.840382	-0.0349372	10	10	all	0.896322	0.051151	10	10
APEH	all	0.000403281	-0.0191543	10	10	all	0.237905	-0.00338286	10	10	all	0.00221121	-0.0142312	10	10	all	0.955507	0.00313664	10	10	all	0.823931	0.026284	10	10	all	0.865663	0.0356333	10	10	all	0.201545	-0.0684086	10	10	all	0.619037	-0.023532	10	10	all	0.348564	-0.0688872	10	10
APEX1	all	0.0158392	-0.0201533	10	10	all	0.834651	0.00633527	10	10	all	0.0683905	-0.00837032	10	10	all	0.0492762	0.0578229	10	10	all	0.19552	0.0909029	10	10	all	0.067526	0.0638085	10	10	all	0.36836	0.00131901	10	10	all	0.126706	0.058536	10	10	all	0.178485	0.0174814	10	10
APEX2	all	0.027378	-0.0299609	10	10	all	0.0429747	-0.021076	10	10	all	0.0495302	-0.0338785	10	10	all	0.218387	0.0552123	10	10	all	0.233618	0.102372	10	10	all	0.152313	0.0696758	10	10	all	0.818827	-0.0343223	10	10	all	0.944632	-0.0120055	10	10	all	0.876944	-0.0201913	10	10
APH1A	all	0.0499329	0.0168685	10	10	all	0.695141	0.00368803	10	10	all	0.11882	0.0118963	10	10	all	0.356902	0.0308762	10	10	all	0.758929	-0.060456	10	10	all	0.589589	-0.0297549	10	10	all	0.204129	0.0551921	10	10	all	0.682732	-0.0483491	10	10	all	0.497339	0.0360969	10	10
APH1B	all	0.769655	0.00946809	10	10	all	0.184058	0.00394238	10	10	all	0.205201	0.00380932	10	10	all	0.28459	0.142124	10	10	all	0.591104	0.175113	10	10	all	0.337707	0.150051	10	10	all	0.155833	0.116121	10	10	all	0.207677	0.138052	10	10	all	0.161093	0.127087	10	10
API5	all	0.000169164	-0.0556804	10	10	all	0.000542459	-0.0411504	10	10	all	0.000144337	-0.0480558	10	10	all	0.0260752	-0.076924	10	10	all	0.00016493	-0.104263	10	10	all	0.000513168	-0.0868019	10	10	all	0.000318555	-0.167257	10	10	all	5.76435e-06	-0.147567	10	10	all	2.0582e-05	-0.157412	10	10
APIP	all	0.351876	-0.00412163	10	10	all	0.120051	-5.39644e-05	10	10	all	0.929402	0.00404485	10	10	all	0.904611	0.0394179	10	10	all	0.239777	-0.064359	10	10	all	0.28739	0.0391471	10	10	all	0.532808	0.044765	10	10	all	0.417959	-0.0391257	10	10	all	0.439936	-0.0228758	10	10
APITD1	all	0.021961	-0.0335813	10	10	all	0.0552432	-0.0292185	10	10	all	0.015742	-0.0313999	10	10	all	0.932068	0.0598614	10	10	all	0.241226	0.0411702	10	10	all	0.273768	0.0237361	10	10	all	0.16915	-0.0126613	10	10	all	0.863359	-0.000280517	10	10	all	0.388895	-0.00621151	10	10
APLF	all	0.737523	-0.00901246	10	10	all	0.0969764	-0.0234489	10	10	all	0.253017	-0.0146998	10	10	all	0.727259	-0.0365165	10	10	all	0.124867	0.0242516	10	10	all	0.174338	-0.00495814	10	10	all	0.84394	-0.017997	10	10	all	0.368287	-0.00975552	10	10	all	0.519228	-0.0133247	10	10
APLN	all	0.916548	-0.00467436	10	10	all	0.95621	0.00619065	10	10	all	0.898011	-0.0012395	10	10	all	0.897853	0.0208806	10	10	all	0.260897	-0.0479907	10	10	all	0.378166	-0.0260324	10	10	all	0.99973	-0.00020658	10	10	all	0.250614	-0.0474875	10	10	all	0.477493	-0.0412642	10	10
APLNR	all	0.0180199	-0.0280262	10	10	all	0.755893	0.00649023	10	10	all	0.0997357	-0.0134598	10	10	all	0.82644	0.00524132	10	10	all	0.285456	-0.126489	10	10	all	0.45082	-0.0540811	10	10	all	0.347394	-0.0781326	10	10	all	0.290875	-0.0686049	10	10	all	0.196334	-0.0537864	10	10
APLP1	all	0.947846	-0.0136437	10	10	all	0.412223	-0.0107151	10	10	all	0.911627	-0.0130502	10	10	all	0.245175	0.0158343	10	10	all	0.369218	0.040129	10	10	all	0.230301	0.0246455	10	10	all	0.448387	0.0192777	10	10	all	0.713652	0.0332389	10	10	all	0.618403	0.0292689	10	10
APLP2	all	0.0836476	0.00581406	10	10	all	0.27533	0.0125533	10	10	all	0.0332465	0.00306232	10	10	all	0.197911	-0.0364534	10	10	all	0.670733	0.0498392	10	10	all	0.679778	-0.0227434	10	10	all	0.514312	0.0246926	10	10	all	0.502142	0.0526418	10	10	all	0.959196	0.0325636	10	10
APMAP	all	0.361772	0.00615866	9	9	all	0.506882	-0.00614648	9	9	all	0.845056	0.000251419	9	9	all	0.710951	0.112143	9	9	all	0.69222	-0.0133443	9	9	all	0.969113	0.0475344	9	9	all	0.628736	0.0789731	9	9	all	0.606738	-0.0212867	9	9	all	0.908526	0.0444042	9	9
APOA1	ENST00000236850.4	0.690377	0.0121281	10	10	ENST00000236850.4	0.148833	0.00588785	10	10	ENST00000236850.4	0.174137	0.00820569	10	10	ENST00000236850.4	0.00908008	-0.108749	10	10	ENST00000236850.4	0.127627	-0.0353863	10	10	ENST00000236850.4	0.0186659	-0.0910632	10	10	ENST00000236850.4	0.0165575	-0.033908	10	10	ENST00000375320.1,ENST00000359492.2,ENST00000375323.1	0.101811	-0.0202491	10	10	ENST00000236850.4	0.0376059	-0.0199373	10	10
APOA1BP	all	0.690543	0.00795312	10	10	all	0.576321	0.00423191	10	10	all	0.990482	0.00587808	10	10	all	0.97912	0.0189184	10	10	all	0.383243	0.0518286	10	10	all	0.510427	0.0260362	10	10	all	0.651183	0.0384641	10	10	all	0.265827	0.0477594	10	10	all	0.603581	0.0357104	10	10
APOA2	all	0.742941	-0.00473413	10	10	all	0.265242	0.0108319	10	10	all	0.42085	0.00400035	10	10	all	0.0246458	0.103672	10	10	all	0.113281	0.0397412	10	10	all	0.034994	0.0908026	10	10	all	0.035664	0.0866564	10	10	all	0.0392253	0.0385265	10	10	all	0.0163139	0.0495717	10	10
APOA4	all	0.413109	0.00665258	10	10	all	0.398134	0.000974403	10	10	all	0.25722	0.00624488	10	10	all	0.811677	-0.0975563	10	10	all	0.813036	-0.0672547	10	10	all	0.770556	-0.0956888	10	10	all	0.875976	-0.0644899	10	10	all	0.623702	-0.041383	10	10	all	0.695516	-0.0589658	10	10
APOA5	ENST00000227665.4	0.0718156	0.00779788	10	10	ENST00000227665.4	0.773391	0.00520017	10	10	ENST00000227665.4	0.217637	0.00780243	10	10	ENST00000227665.4	0.177928	-0.0345738	10	10	ENST00000227665.4	0.488257	-0.120088	10	10	ENST00000227665.4	0.231137	-0.0371263	10	10	ENST00000227665.4	0.531844	-0.0493897	10	10	ENST00000227665.4	0.452777	-0.0325284	10	10	ENST00000227665.4	0.42312	-0.0218136	10	10
APOB	all	0.168468	-0.012478	10	10	all	0.836372	-0.00492782	10	10	all	0.320601	-0.00562606	10	10	all	0.0865137	0.0873472	10	10	all	0.793449	-0.0421041	10	10	all	0.302417	0.0516243	10	10	all	0.182448	0.0684181	10	10	all	0.98617	-0.0246327	10	10	all	0.495192	0.0424325	10	10
APOBEC1	all	0.0496172	-0.00319511	10	10	all	0.893939	0.00330981	10	10	all	0.335475	-0.0079253	10	10	all	0.129932	-0.214815	10	10	all	0.0885994	-0.138864	10	10	all	0.0507915	-0.183733	10	10	all	0.0239177	-0.184836	10	10	all	0.023466	-0.12191	10	10	all	0.00857017	-0.137702	10	10
APOBEC2	all	0.0888615	-0.0256334	10	10	all	0.733325	-0.00567278	10	10	all	0.156471	-0.0154619	10	10	all	0.0160719	0.167089	10	10	all	0.0100274	0.168505	10	10	all	0.00494528	0.163945	10	10	all	0.0693894	0.115413	10	10	all	0.0164013	0.137387	10	10	all	0.0160784	0.124806	10	10
APOBEC3A	ENST00000402255.1	0.201405	-0.0148281	10	10	ENST00000402255.1	0.486048	-0.00749093	10	10	ENST00000402255.1	0.0825779	-0.00351619	10	10	ENST00000402255.1	0.491491	-0.03086	10	10	ENST00000402255.1	0.357079	-0.0361868	10	10	ENST00000402255.1	0.420305	-0.0607543	10	10	ENST00000402255.1	0.198078	-0.0272634	10	10	ENST00000402255.1	0.209536	-0.0516214	10	10	ENST00000402255.1	0.174504	-0.0600611	10	10
APOBEC3B	all	0.399414	-0.00674298	10	10	all	0.628888	-0.00461437	10	10	all	0.349329	-0.00736058	10	10	all	0.459437	0.00327927	10	10	all	0.311371	0.00138456	10	10	all	0.315496	-0.0143533	10	10	all	0.422751	-0.0257062	10	10	all	0.144111	-0.0165977	10	10	all	0.139179	-0.0119333	10	10
APOBEC3C	all	0.136327	0.00959456	10	10	all	0.214993	0.0046107	10	10	all	0.0603885	0.0147818	10	10	all	0.0117753	-0.134721	10	10	all	0.0223488	-0.0854494	10	10	all	0.00371011	-0.0936802	10	10	all	0.129109	-0.121493	10	10	all	0.0590079	-0.0551968	10	10	all	0.0244941	-0.0769025	10	10
APOBEC3D	ENST00000216099.8	0.174562	-0.0128867	9	9	ENST00000216099.8	0.130471	-0.0313521	10	10	ENST00000216099.8	0.248873	-0.0130686	9	9	ENST00000216099.8	0.171602	-0.130655	9	9	ENST00000216099.8	0.0238433	-0.0536964	9	9	ENST00000216099.8	0.0415382	-0.129155	9	9	ENST00000216099.8	0.0582864	-0.126076	9	9	ENST00000216099.8	0.00915286	-0.183819	10	10	ENST00000216099.8	0.0373108	-0.137815	9	9
APOBEC3F	all	0.0788957	-0.0207187	10	10	all	0.578559	-0.0139376	10	10	all	0.241788	-0.0257413	10	10	all	0.260897	-0.0681784	10	10	all	0.114522	-0.141569	10	10	all	0.137887	-0.0813525	10	10	all	0.0476879	-0.0780826	10	10	all	0.0984301	-0.139751	10	10	all	0.0540016	-0.0878754	10	10
APOBEC3G	ENST00000407997.3	0.220881	-0.0029941	9	9	ENST00000452957.2	0.49986	-0.00445162	7	7	ENST00000452957.2	0.404835	-0.00906768	7	7	ENST00000452957.2	0.780806	-0.0190174	7	7	ENST00000452957.2	0.629612	0.0333058	7	7	ENST00000407997.3	0.752704	-0.0645464	9	9	ENST00000407997.3	0.372783	-0.0774247	9	9	ENST00000407997.3	0.796895	-0.0241748	9	9	ENST00000407997.3	0.587113	-0.0899054	9	9
APOBEC4	all	0.46696	-0.0046411	10	10	all	0.411515	-0.0138175	10	10	all	0.299217	-0.00996742	10	10	all	0.39019	-0.0303881	10	10	all	0.0206518	-0.0882357	10	10	all	0.0589754	-0.0383196	10	10	all	0.341141	-0.0364437	10	10	all	0.00989517	-0.0768327	10	10	all	0.0421104	-0.044652	10	10
APOBR	all	0.454803	-0.00591016	10	10	all	0.543169	0.00483165	10	10	all	0.984167	0.00221462	10	10	all	0.0397211	0.151609	10	10	all	0.0911793	0.0870191	10	10	all	0.046838	0.145991	10	10	all	0.0668123	0.128049	10	10	all	0.0593117	0.122036	10	10	all	0.0393322	0.12031	10	10
APOC1	ENST00000252491.4	0.0693506	0.0191532	9	9	ENST00000252491.4	0.29221	0.00718388	9	9	ENST00000252491.4	0.0926639	0.0151093	9	9	ENST00000588750.1,ENST00000588802.1	0.421533	0.0567691	10	10	ENST00000252491.4	0.0889308	-0.0288532	9	9	ENST00000252491.4	0.344056	-0.0224176	9	9	ENST00000588750.1,ENST00000588802.1	0.289029	0.0388124	10	10	ENST00000252491.4	0.21752	-0.0193157	9	9	ENST00000252491.4	0.816676	0.0171932	9	9
APOC2	ENST00000252490.4	0.139098	-0.00799896	10	10	ENST00000590360.1	0.525076	0.0116506	10	10	ENST00000590360.1	0.318622	0.00406562	10	10	ENST00000252490.4	0.0579917	0.104553	10	10	ENST00000252490.4	0.0977391	0.0931532	10	10	ENST00000252490.4	0.0258453	0.0797715	10	10	ENST00000252490.4	0.134803	0.0296492	10	10	ENST00000252490.4	0.0333426	0.068464	10	10	ENST00000252490.4	0.0366197	0.0331333	10	10
APOC3	all	0.660938	-0.0124936	10	10	all	0.0639377	-0.0283495	10	10	all	0.423531	-0.0106748	10	10	all	0.326576	-0.0347222	10	10	all	0.295803	-0.0388131	10	10	all	0.334976	-0.0915217	10	10	all	0.160629	-0.0691397	10	10	all	0.232753	-0.0259874	10	10	all	0.134026	-0.0646249	10	10
APOC4	all	0.409443	-0.0060818	10	10	all	0.823994	-0.00208498	10	10	all	0.660233	0.00233469	10	10	all	0.937867	0.0345374	10	10	all	0.373817	-0.0472793	10	10	all	0.5504	0.0264148	10	10	all	0.764349	0.0575466	10	10	all	0.340882	-0.0454268	10	10	all	0.581613	0.0228988	10	10
APOD	all	0.108404	0.0148248	10	10	all	0.801992	0.0031005	10	10	all	0.270558	0.00328982	10	10	all	0.245796	0.11128	10	10	all	0.597444	0.146892	10	10	all	0.274563	0.105639	10	10	all	0.0501113	0.134723	10	10	all	0.509616	0.0824318	10	10	all	0.120877	0.109982	10	10
APOE	all	0.885647	-0.0048385	10	10	all	0.102749	0.0134721	10	10	all	0.396421	0.00901718	10	10	all	0.521399	-0.0285531	10	10	all	0.405202	-0.0191286	10	10	all	0.361018	-0.0166903	10	10	all	0.394252	-0.016833	10	10	all	0.749328	0.0284311	10	10	all	0.4088	0.0288356	10	10
APOF	all	0.955269	-0.0601538	10	10	all	0.212226	-0.0390251	10	10	all	0.695737	-0.0533776	10	10	all	0.957579	0.0503122	10	10	all	0.965147	0.028244	10	10	all	0.807763	0.0147992	10	10	all	0.386059	-0.0664275	10	10	all	0.634527	-0.0724391	10	10	all	0.491696	-0.0646731	10	10
APOH	all	0.289826	0.00784074	10	10	all	0.3537	0.0211009	10	10	all	0.0631305	0.0105945	10	10	all	0.000135976	-0.120474	10	10	all	0.0529706	-0.176197	10	10	all	0.000970252	-0.148336	10	10	all	0.00190343	-0.118315	10	10	all	0.184266	-0.137906	10	10	all	0.00975433	-0.128111	10	10
APOL1	all	0.0233523	-0.0202091	7	7	ENST00000397278.3	0.0754339	-0.0163225	2	2	ENST00000397278.3,ENST00000422706.1	0.091746	-0.0284459	1	1	ENST00000422706.1,ENST00000397279.4	0.246754	-0.0357969	3	3	ENST00000397279.4	0.178611	0.0810939	1	1	ENST00000397279.4	0.174522	0.0697084	1	1	all	0.158006	-0.0433597	7	7	ENST00000397279.4	0.184186	0.0617909	1	1	ENST00000397279.4	0.180247	0.054672	1	1
APOL2	ENST00000358502.5	0.363469	0.00115994	4	4	ENST00000249066.6	0.157145	-0.0239183	10	10	ENST00000249066.6	0.0810104	-0.00852674	10	10	ENST00000358502.5	0.17447	0.0654057	4	4	all	0.334091	-0.0459983	1	1	all	0.143146	-0.0765561	1	1	ENST00000358502.5	0.0587931	0.0505816	4	4	all	0.0819224	-0.0968514	2	2	ENST00000358502.5	0.167772	0.0389513	4	4
APOL3	all	0.641245	-0.00361383	10	10	all	0.400409	0.0237536	10	10	all	0.517647	0.0124331	10	10	all	0.589348	-0.0558662	10	10	all	0.371937	0.0749734	10	10	all	0.74224	-0.0291494	10	10	all	0.68406	-0.0671665	10	10	all	0.46321	0.108696	10	10	all	0.538239	0.0286242	10	10
APOL4	all	0.934946	-0.00894362	10	10	all	0.449524	-0.0087512	10	10	all	0.397556	-0.00536621	10	10	all	0.489606	-0.0634527	10	10	all	0.18038	-0.103002	10	10	all	0.142082	-0.0429884	10	10	all	0.324645	-0.0740738	10	10	all	0.105672	-0.0868343	10	10	all	0.118245	-0.0783716	10	10
APOL5	all	0.163086	-0.0076944	10	10	all	0.488917	-0.0107851	10	10	all	0.147042	-0.00787039	10	10	all	0.798247	0.016534	10	10	all	0.760608	0.0184498	10	10	all	0.999052	0.0223342	10	10	all	0.433716	-0.0251723	10	10	all	0.905211	-0.0307972	10	10	all	0.601926	-0.0166887	10	10
APOL6	all	0.0913806	-0.011718	10	10	all	0.260665	-0.0318255	10	10	all	0.789269	-0.0234624	10	10	all	0.829259	0.0754769	10	10	all	0.890522	0.117491	10	10	all	0.887435	0.096484	10	10	all	0.788199	-0.0196763	10	10	all	0.772856	-0.0236675	10	10	all	0.960457	0.0191303	10	10
APOLD1	all	0.529053	-0.0338271	9	9	all	0.721692	-0.00131188	8	8	all	0.839138	-0.00931055	8	8	all	0.126919	-0.0208367	8	8	all	0.651461	0.00998263	8	8	all	0.181508	0.00593034	8	8	all	0.0606673	-0.0167509	9	9	all	0.664023	0.00284146	8	8	all	0.129768	-0.0044022	8	8
APOM	all	0.423863	-0.0233546	10	10	all	0.0964319	-0.0455967	10	10	all	0.0218903	-0.0265166	10	10	all	0.185714	0.0116825	10	10	all	0.650256	0.0699722	10	10	all	0.531298	0.0334737	10	10	all	0.11974	-0.00657693	10	10	all	0.419519	-0.00477916	10	10	all	0.193491	-0.00228435	10	10
APOO	all	0.500276	0.0247585	10	10	all	0.758773	-0.0133089	10	10	all	0.849287	-0.00409434	10	10	all	0.993054	-0.0420573	10	10	all	0.717942	-0.177339	10	10	all	0.961044	-0.138921	10	10	all	0.732554	0.0167562	9	9	all	0.964511	-0.182771	10	10	all	0.491705	-0.0453091	9	9
APOOL	all	1.36105e-07	-0.0977531	10	10	all	4.88217e-06	-0.101369	10	10	all	1.50847e-07	-0.097359	10	10	all	0.00024353	0.146235	10	10	all	0.125381	0.167577	10	10	all	0.00564575	0.148029	10	10	all	0.00167403	-0.0822126	10	10	all	0.000209973	-0.147168	10	10	all	0.000107537	-0.107645	10	10
APOPT1	all	0.92708	-0.00165898	8	8	all	0.265626	0.00885112	8	8	all	0.422298	0.00308697	8	8	all	0.07093	-0.0808739	8	8	all	0.09875	-0.0994161	8	8	all	0.043504	-0.0793232	8	8	all	0.0711339	-0.0613388	8	8	all	0.206951	-0.0753857	8	8	all	0.080242	-0.0627651	8	8
APP	all	0.378306	0.00265364	10	10	all	0.374417	0.0127312	10	10	all	0.868024	0.00822694	10	10	all	0.256275	0.04012	10	10	all	0.812949	0.100232	10	10	all	0.496636	0.0951883	10	10	all	0.507486	0.0734074	10	10	all	0.614227	0.104467	10	10	all	0.506918	0.084193	10	10
APPBP2	all	0.30175	-0.0024981	10	10	all	0.467433	-0.0184053	10	10	all	0.102632	-0.0133148	10	10	all	0.835036	-0.0198551	10	10	all	0.523457	-0.0336961	10	10	all	0.625281	-0.0267756	10	10	all	0.449368	-0.00799909	10	10	all	0.370334	-0.0531911	10	10	all	0.244485	-0.0247043	10	10
APPL1	all	0.504415	-0.000870488	10	10	all	0.79414	0.00545512	10	10	all	0.705877	0.00189473	10	10	all	0.0544721	-0.0927661	10	10	all	0.144308	-0.0148987	10	10	all	0.0766183	-0.0755089	10	10	all	0.044795	-0.0832839	10	10	all	0.123744	-0.00744248	10	10	all	0.0410469	-0.055488	10	10
APPL2	all	0.253834	-0.00533931	10	10	all	0.0665828	0.0227438	10	10	all	0.768885	0.00817036	10	10	all	0.331225	0.0140262	10	10	all	0.779666	-0.0140551	10	10	all	0.482975	0.0391627	10	10	all	0.560503	0.000380368	10	10	all	0.143384	0.0472764	10	10	all	0.287989	0.0173848	10	10
APRT	all	0.603879	0.00748848	10	10	all	0.443788	0.00886819	10	10	all	0.612799	0.00410756	10	10	all	0.311803	0.0418091	10	10	all	0.64311	-0.0135418	10	10	all	0.822703	0.0380483	10	10	all	0.463749	0.0445024	10	10	all	0.891136	-0.0173428	10	10	all	0.522164	0.0231926	10	10
APTX	ENST00000379819.1,ENST00000463596.1,ENST00000379813.3	0.272136	-0.0154089	10	10	ENST00000379819.1,ENST00000463596.1,ENST00000379813.3	0.196441	-0.00685805	10	10	ENST00000379819.1,ENST00000463596.1,ENST00000379813.3	0.100694	-0.0124039	10	10	ENST00000468275.1	0.107563	-0.131895	5	5	ENST00000379819.1,ENST00000463596.1,ENST00000379813.3	0.120712	0.095138	10	10	ENST00000468275.1	0.131564	-0.0806464	5	5	ENST00000468275.1	0.111093	-0.0982015	5	5	ENST00000379819.1,ENST00000463596.1,ENST00000379813.3	0.223278	0.0279392	10	10	ENST00000468275.1	0.09052	-0.0632608	5	5
AQP1	all	0.676153	0.00854018	10	10	all	0.445943	-0.00690167	10	10	all	0.937134	0.0027461	10	10	all	0.123662	0.0462753	10	10	all	0.655841	0.0261389	10	10	all	0.212933	0.0278073	10	10	all	0.148621	0.0632804	10	10	all	0.796204	0.0140599	10	10	all	0.261135	0.0337874	10	10
AQP10	all	0.0664936	-0.000560775	10	10	all	0.330793	0.00103783	10	10	all	0.0669796	-0.00110824	10	10	all	0.218176	0.0594182	10	10	all	0.439849	-0.0449473	10	10	all	0.859968	0.0262192	10	10	all	0.0816286	0.0669992	10	10	all	0.994233	-0.0889116	10	10	all	0.35388	0.00167749	10	10
AQP11	all	0.745975	-0.0338422	10	10	all	0.682494	-0.00408724	10	10	all	0.404149	-0.015072	10	10	all	0.184552	0.012172	10	10	all	0.493594	0.0608098	10	10	all	0.256017	0.000380342	10	10	all	0.20431	-0.0407041	10	10	all	0.660087	-0.0168259	10	10	all	0.330219	-0.0327664	10	10
AQP2	all	0.411563	0.00996445	10	10	all	0.612855	-0.0042501	10	10	all	0.787876	0.00224583	10	10	all	0.960732	0.0646158	10	10	all	0.297635	-0.0170638	10	10	all	0.483186	0.0139604	10	10	all	0.709078	0.0609758	10	10	all	0.310301	-0.0295164	10	10	all	0.635397	0.00554776	10	10
AQP3	all	0.0737351	-0.0276824	10	10	all	0.240566	-0.0168222	10	10	all	0.063662	-0.0198214	10	10	all	0.00601417	-0.0970972	10	10	all	0.0331334	-0.118268	10	10	all	0.00641031	-0.105189	10	10	all	0.00190743	-0.130687	10	10	all	0.0145908	-0.13384	10	10	all	0.00257671	-0.130226	10	10
AQP6	all	0.175507	0.0152145	10	10	all	0.525776	0.00619632	10	10	all	0.341524	0.00859871	10	10	all	0.805676	0.0280028	10	10	all	0.525926	0.044418	10	10	all	0.439015	0.019889	10	10	all	0.340683	0.0318993	10	10	all	0.38477	0.0786623	10	10	all	0.243569	0.0525613	10	10
AQP8	all	0.866635	0.00800007	10	10	all	0.721871	0.0166761	10	10	all	0.817608	0.0110375	10	10	all	0.89839	-0.0352428	10	10	all	0.710351	-0.00348999	10	10	all	0.747551	-0.00222005	10	10	all	0.967694	0.0176159	10	10	all	0.790588	0.00169363	10	10	all	0.887473	0.0185925	10	10
AQPEP	all	0.404808	0.00022842	10	10	all	0.163845	0.012864	10	10	all	0.701849	-0.000328477	10	10	all	0.660299	0.00979561	10	10	all	0.521252	-0.00853944	10	10	all	0.905076	0.0144176	10	10	all	0.888904	-0.0172385	10	10	all	0.833105	0.00366084	10	10	all	0.855775	0.00182844	10	10
AQR	all	0.0843162	-0.0374889	6	6	all	0.0529035	-0.0192361	6	6	all	0.0147842	-0.0289763	6	6	all	0.0697348	-0.165394	5	5	all	0.0556633	-0.094864	5	5	all	0.133099	-0.0529005	4	4	all	0.00553195	-0.258346	6	6	all	0.00265633	-0.260989	6	6	all	0.00198794	-0.259667	6	6
AR	all	0.626919	-0.0225946	10	10	all	0.246318	-0.0173155	10	10	all	0.372687	-0.0215688	10	10	all	0.588881	-0.034868	10	10	all	0.581885	-0.022153	10	10	all	0.510718	-0.0234786	10	10	all	0.48992	-0.044238	10	10	all	0.340682	-0.0467571	10	10	all	0.407262	-0.0454976	10	10
ARAF	all	0.624358	-0.0757097	10	10	all	0.0192909	-0.0561395	10	10	all	0.0685965	-0.0668995	10	10	all	0.260528	-0.0360281	9	9	all	0.993731	0.032896	10	10	all	0.392343	-0.0313378	9	9	all	0.14726	-0.147416	10	10	all	0.142168	-0.0638967	10	10	all	0.122265	-0.0825279	10	10
ARAP1	ENST00000393609.3	0.167162	-0.0108812	10	10	ENST00000393609.3	0.0818845	-0.0146555	10	10	ENST00000393609.3	0.0692695	-0.0157564	10	10	ENST00000455638.2	0.173367	-0.0671239	10	10	ENST00000393609.3	0.744814	-0.0152027	10	10	ENST00000455638.2	0.422986	-0.0227379	10	10	ENST00000455638.2	0.431001	-0.0304842	10	10	ENST00000393609.3	0.274709	-0.0164541	10	10	ENST00000393609.3	0.29748	-0.0163375	10	10
ARAP2	all	0.787242	-0.0215193	10	10	all	0.118684	-0.004655	10	10	all	0.267424	-0.0117564	10	10	all	0.525151	-0.095058	10	10	all	0.643596	-0.0121968	10	10	all	0.572065	-0.0598945	10	10	all	0.557236	-0.116491	10	10	all	0.901812	-0.0264787	10	10	all	0.793558	-0.0243663	10	10
ARAP3	all	0.609722	0.0126283	10	10	all	0.136927	0.0333183	10	10	all	0.227804	0.0224426	10	10	all	0.996166	-0.00755439	10	10	all	0.173528	0.0394005	10	10	all	0.76822	0.0468885	10	10	all	0.973549	-0.059406	10	10	all	0.0444299	0.137055	9	9	all	0.321775	0.102994	9	9
ARC	all	0.268161	-0.0321483	10	10	all	0.780276	-0.0323676	10	10	all	0.600865	-0.0401599	10	10	all	0.355164	0.100939	10	10	all	0.714312	0.048046	10	10	all	0.393419	0.0744408	10	10	all	0.551635	0.0413856	10	10	all	0.879856	-0.0546123	10	10	all	0.613471	-0.0445996	10	10
ARCN1	all	2.07876e-05	-0.112306	8	8	all	0.000477654	-0.114008	9	9	all	0.000103021	-0.0826527	8	8	all	3.12607e-05	0.336172	8	8	all	0.0159891	0.229152	8	8	all	0.00029338	0.277239	8	8	all	0.0143612	0.103218	8	8	all	0.568214	0.120871	9	9	all	0.0450803	0.111024	8	8
AREG	all	0.789155	-0.0083076	10	10	all	0.548238	0.00674213	10	10	all	0.969918	0.00269354	10	10	all	0.308892	-0.0492658	10	10	all	0.232467	-0.0425151	10	10	all	0.152573	-0.0376098	10	10	all	0.282629	-0.050265	10	10	all	0.595314	-0.0487116	10	10	all	0.150456	-0.0342284	10	10
AREL1	all	0.163103	-0.0394043	10	10	all	0.109841	-0.0299635	10	10	all	0.161016	-0.0426261	10	10	all	0.339048	0.124934	10	10	all	0.813256	0.0459563	10	10	all	0.496277	0.055654	10	10	all	0.664708	-0.024714	10	10	all	0.178348	-0.0190956	10	10	all	0.765541	-0.0392069	10	10
ARF1	ENST00000272102.5,ENST00000540651.1	0.471608	-0.000477795	10	10	ENST00000272102.5,ENST00000540651.1	0.604709	-0.00789435	10	10	ENST00000541182.1	0.610975	-0.00656494	10	10	ENST00000541182.1	0.430172	-0.0107997	10	10	ENST00000541182.1	0.179297	-0.054817	10	10	ENST00000541182.1	0.20096	-0.0387236	10	10	ENST00000541182.1	0.322541	-0.0234897	10	10	ENST00000541182.1	0.106919	-0.0472896	10	10	ENST00000541182.1	0.108163	-0.0393049	10	10
ARF3	all	0.645983	0.00241727	10	10	all	0.466326	0.00750079	10	10	all	0.405424	0.00325872	10	10	all	0.821776	-0.0542322	10	10	all	0.340592	-0.0410793	10	10	all	0.470494	-0.0438908	10	10	all	0.782683	-0.0343976	10	10	all	0.503402	-0.0611013	10	10	all	0.625994	-0.0344525	10	10
ARF4	all	0.138074	0.00856721	10	10	all	0.566413	0.00806765	10	10	all	0.228065	0.00895239	10	10	all	0.202278	-0.0112021	10	10	all	0.221341	0.0854278	10	10	all	0.892087	-0.00139658	10	10	all	0.574549	-0.0074269	10	10	all	0.153727	0.0774603	10	10	all	0.541679	0.0306558	10	10
ARF5	all	0.715816	-0.0205697	10	10	all	0.522942	-0.00872948	10	10	all	0.907235	-0.0110155	10	10	all	0.6527	0.0176565	10	10	all	0.0263037	-0.104424	10	10	all	0.14694	-0.0433835	10	10	all	0.870903	-0.0288287	10	10	all	0.0934618	-0.153377	10	10	all	0.251754	-0.068303	10	10
ARF6	all	0.17746	-0.00546597	10	10	all	0.196637	0.0131733	10	10	all	0.744207	0.00400929	10	10	all	0.193208	0.126067	10	10	all	0.971546	-0.0374515	10	10	all	0.476221	-0.0351032	10	10	all	0.369564	0.0797747	10	10	all	0.957312	-0.00930448	10	10	all	0.60579	0.0342353	10	10
ARFGAP1	all	0.247497	-0.0304246	10	10	all	0.602661	-0.0242471	10	10	all	0.345557	-0.0255867	10	10	all	0.453932	0.0439264	10	10	all	0.318448	0.0749863	10	10	all	0.323918	0.0369058	10	10	all	0.600024	0.00303948	10	10	all	0.642111	0.0200297	10	10	all	0.552515	0.00544195	10	10
ARFGAP2	all	0.742615	-0.0126396	9	9	all	0.439325	-0.000302711	9	9	all	0.985592	-0.00549008	9	9	all	0.109982	-0.0373403	9	9	all	0.69812	-0.0253729	9	9	all	0.356177	-0.0719009	9	9	all	0.123556	-0.0790778	9	9	all	0.824351	-0.0225571	9	9	all	0.389162	-0.04337	9	9
ARFGAP3	all	0.159805	-0.0166091	10	10	all	0.0614741	-0.0287006	10	10	all	0.0165055	-0.0170856	10	10	all	0.729934	-0.0422557	10	10	all	0.755317	-0.041927	10	10	all	0.93725	-0.0444975	10	10	all	0.781685	-0.0390039	10	10	all	0.15668	-0.027192	10	10	all	0.304242	-0.0329593	10	10
ARFGEF1	all	0.772636	0.00950039	10	10	all	0.604591	0.0107461	10	10	all	0.422745	0.00565909	10	10	all	0.450362	-0.00252529	10	10	all	0.61625	0.0437203	10	10	all	0.566304	-0.00310234	10	10	all	0.598062	0.000414408	10	10	all	0.77584	0.0403713	10	10	all	0.611805	0.00905625	10	10
ARFGEF2	all	0.259805	0.0195621	10	10	all	0.948471	0.00636595	10	10	all	0.358546	0.00764716	10	10	all	0.0334142	-0.121651	10	10	all	0.111186	-0.0566489	10	10	all	0.0281377	-0.0964442	10	10	all	0.0725137	-0.0886328	10	10	all	0.21798	-0.0929505	10	10	all	0.0725296	-0.0782495	10	10
ARFIP1	all	0.114356	0.00641151	10	10	all	0.123743	-0.00620792	10	10	all	0.837254	-0.00293311	10	10	all	0.248497	0.0923298	10	10	all	0.990033	0.00291627	10	10	all	0.520368	0.0653963	10	10	all	0.0855422	0.0846205	10	10	all	0.56375	0.000737773	10	10	all	0.484178	0.0323184	10	10
ARFIP2	all	0.96891	-0.00362843	10	10	all	0.6767	-0.011941	10	10	all	0.41766	-0.00266918	10	10	all	0.800998	0.0204305	10	10	all	0.39759	0.0946466	10	10	all	0.902925	0.0684452	10	10	all	0.765815	0.0240146	10	10	all	0.634567	0.077841	10	10	all	0.760455	0.0552	10	10
ARFRP1	all	0.9248	-0.0441154	10	10	all	0.700324	-0.0267446	10	10	all	0.771652	-0.0286206	10	10	all	0.418243	0.0206936	10	10	all	0.742334	0.020629	10	10	all	0.510791	0.0219695	10	10	all	0.746874	-0.0179593	10	10	all	0.636419	-0.071039	10	10	all	0.594154	-0.0611934	10	10
ARG1	all	0.810146	0.00426339	10	10	all	0.836284	-0.00734245	10	10	all	0.779361	-0.002406	10	10	all	0.13009	0.0940969	10	10	all	0.0986469	0.144613	10	10	all	0.0780989	0.112598	10	10	all	0.120116	0.0427627	10	10	all	0.0815566	0.107394	10	10	all	0.0629494	0.0442406	10	10
ARG2	all	0.738759	-0.0116821	10	10	all	0.309514	0.00587447	10	10	all	0.454419	-0.00813965	10	10	all	0.755747	0.0228676	10	10	all	0.190245	-0.0757415	10	10	all	0.556386	-0.0246298	10	10	all	0.875085	-0.0167247	10	10	all	0.341942	-0.0242802	10	10	all	0.627356	-0.0140249	10	10
ARGFX	all	0.671574	-0.00923233	10	10	all	0.221008	0.0151063	10	10	all	0.416816	-0.00228796	10	10	all	0.590714	0.0230976	10	10	all	0.692332	0.0224718	10	10	all	0.527445	0.0150745	10	10	all	0.872593	0.0154545	10	10	all	0.303273	0.0532793	10	10	all	0.457471	0.0184646	10	10
ARGLU1	all	0.29537	-0.0902953	10	10	all	0.011984	-0.0827598	10	10	all	0.135371	-0.0835261	10	10	all	0.00230618	-0.0911651	10	10	all	0.00671036	-0.234807	10	10	all	0.00121185	-0.185108	10	10	all	0.0128032	-0.313273	10	10	all	0.00183858	-0.281667	10	10	all	0.00385334	-0.288533	10	10
ARHGAP1	all	0.954605	-0.0102194	9	9	all	0.530766	-0.0210921	9	9	all	0.564508	-0.00930098	9	9	all	0.811561	0.065555	9	9	all	0.722034	0.023045	9	9	all	0.857902	0.0655945	9	9	all	0.808141	0.0112976	9	9	all	0.852677	-0.018744	9	9	all	0.741014	0.0212459	9	9
ARHGAP10	all	0.286173	0.0159877	7	7	all	0.275105	-0.00130356	7	7	all	0.186817	0.00441586	7	7	all	0.0990473	0.139436	8	8	all	0.320021	0.0191526	7	7	all	0.259526	0.0719951	7	7	all	0.0372079	0.0938502	8	8	all	0.301426	0.0608233	7	7	all	0.164078	0.0705407	7	7
ARHGAP11A	all	0.00968385	-0.00994934	10	10	all	0.0161901	-0.0383587	10	10	all	0.01563	-0.0329131	10	10	all	0.170106	0.0629	10	10	all	0.689915	0.0437888	10	10	all	0.336567	0.064831	10	10	all	0.694503	0.00942268	10	10	all	0.545401	-0.0736945	10	10	all	0.685433	-0.0492405	10	10
ARHGAP11B	all	0.0271285	-0.0326782	9	9	all	0.30014	-0.0138935	9	9	all	0.00849089	-0.0177624	9	9	all	0.453627	0.15812	9	9	all	0.516508	0.0105344	9	9	all	0.968447	0.0741462	9	9	all	0.951664	0.0501725	9	9	all	0.37282	-0.00914428	9	9	all	0.609211	0.00209504	9	9
ARHGAP12	all	0.519207	-0.00246893	10	10	all	0.809426	-0.0117793	10	10	all	0.580567	-0.00945006	10	10	all	0.915815	-0.0419798	10	10	all	0.628354	-0.0538956	10	10	all	0.934999	-0.0414094	10	10	all	0.96184	-0.0423384	10	10	all	0.514923	-0.0413045	10	10	all	0.757614	-0.0418214	10	10
ARHGAP15	all	0.61567	0.00489419	10	10	all	0.997476	0.00283986	10	10	all	0.587401	-0.00315915	10	10	all	0.878294	-0.0330058	10	10	all	0.416425	-0.0267588	10	10	all	0.678535	-0.0150588	10	10	all	0.80822	0.0288723	10	10	all	0.519745	-0.0329865	10	10	all	0.752974	-0.00864331	10	10
ARHGAP17	all	0.436608	0.00713628	10	10	all	0.491795	-0.0390853	10	10	all	0.689896	-0.0119347	10	10	all	0.0834131	-0.151092	9	9	all	0.0791421	-0.109777	10	10	all	0.139054	-0.0645954	9	9	all	0.133745	-0.193969	10	10	all	0.0925058	-0.193648	10	10	all	0.0792464	-0.193809	10	10
ARHGAP18	all	0.521773	-0.00127082	10	10	all	0.431813	0.00851239	10	10	all	0.876485	0.00659143	10	10	all	0.956903	0.0221056	10	10	all	0.753428	0.0539805	10	10	all	0.978823	0.0378007	10	10	all	0.747216	-0.0150508	10	10	all	0.438063	0.0796251	10	10	all	0.772799	0.0255488	10	10
ARHGAP19	all	0.543173	-0.097781	10	10	all	0.81258	-0.0774374	10	10	all	0.70034	-0.0880536	10	10	all	0.987191	0.0791929	10	10	all	0.157319	0.0151526	10	10	all	0.434077	0.096737	10	10	all	0.246759	-0.112666	10	10	all	0.787458	-0.0140153	10	10	all	0.698025	-0.0742031	10	10
ARHGAP20	ENST00000260283.4,ENST00000528829.1	0.186295	-0.0260537	10	10	ENST00000260283.4,ENST00000528829.1	0.135176	-0.0198178	10	10	ENST00000260283.4,ENST00000528829.1	0.0907235	-0.0222994	10	10	ENST00000260283.4,ENST00000528829.1	0.326911	-0.0388282	10	10	ENST00000524756.1	0.308677	0.00255848	5	5	ENST00000357139.3	0.49489	-0.017971	3	3	ENST00000260283.4,ENST00000528829.1	0.0319645	-0.0605763	10	10	ENST00000357139.3	0.271004	-0.0253861	3	3	ENST00000260283.4,ENST00000528829.1	0.200675	-0.0677531	10	10
ARHGAP21	all	0.0865545	0.0223888	8	8	all	0.196964	-0.0155626	8	8	all	0.904441	0.00640873	8	8	all	0.0734442	0.091011	8	8	all	0.121262	0.133887	8	8	all	0.0614144	0.106131	8	8	all	0.0112952	0.0913177	8	8	all	0.154776	0.0357475	8	8	all	0.042016	0.0826085	8	8
ARHGAP22	all	0.945193	0.00448019	10	10	all	0.428379	0.0100729	10	10	all	0.65304	0.00537034	10	10	all	0.320812	-0.0588728	10	10	all	0.835433	-0.0298333	10	10	all	0.584602	-0.064164	10	10	all	0.286161	-0.0505576	10	10	all	0.989053	0.0294381	10	10	all	0.67367	-0.018878	10	10
ARHGAP23	all	0.610989	0.00498285	10	10	all	0.340748	0.0122605	10	10	all	0.840967	0.000473242	10	10	all	0.724332	0.0350773	10	10	all	0.349225	-0.0442572	10	10	all	0.751585	-0.0282755	10	10	all	0.711476	-0.025936	10	10	all	0.465519	-0.0270893	10	10	all	0.787115	-0.0217124	10	10
ARHGAP24	all	0.351409	-0.0191513	10	10	all	0.827044	-0.00314668	9	9	all	0.945308	-0.0233131	9	9	all	0.994633	0.0337547	10	10	all	0.980112	0.137196	10	10	all	0.97765	0.0729882	10	10	all	0.595789	0.00439304	10	10	all	0.864113	0.0933204	10	10	all	0.760196	0.030315	10	10
ARHGAP25	all	0.727151	-0.00817206	10	10	all	0.483399	-0.0076646	10	10	all	0.555731	-0.00917623	10	10	all	0.646841	0.162799	10	10	all	0.377992	0.152175	10	10	all	0.611876	0.170429	10	10	all	0.26002	0.124547	10	10	all	0.176515	0.12956	10	10	all	0.176703	0.0991347	10	10
ARHGAP26	all	0.97427	-1.70474e-05	10	10	all	0.255623	0.00376938	10	10	all	0.334568	-0.00135835	10	10	all	0.807646	-0.0653466	10	10	all	0.153439	-0.118062	10	10	all	0.371526	-0.104336	10	10	all	0.939574	-0.0703798	10	10	all	0.290669	-0.0874911	10	10	all	0.583242	-0.0654999	10	10
ARHGAP27	all	0.686094	0.00688982	10	10	all	0.574972	-0.0206993	10	10	all	0.93093	-0.00429864	10	10	all	0.990484	0.0606563	10	10	all	0.226074	0.0933636	10	10	all	0.497855	0.133519	10	10	all	0.903651	0.0679897	10	10	all	0.259906	0.074233	10	10	all	0.560027	0.0511722	10	10
ARHGAP28	all	0.408225	-0.00641424	10	10	all	0.0929516	0.00892228	10	10	all	0.547193	0.00969414	10	10	all	0.957894	0.0473835	10	10	all	0.0538926	-0.0776326	10	10	all	0.396059	-0.0897401	10	10	all	0.698011	-0.0034026	10	10	all	0.143941	-0.0754223	10	10	all	0.44639	-0.028659	10	10
ARHGAP29	all	0.621483	0.00462326	10	10	all	0.0407187	0.0187042	10	10	all	0.0476718	0.010025	10	10	all	0.915636	0.0560221	10	10	all	0.749996	-0.0571755	10	10	all	0.688258	0.0394968	10	10	all	0.712781	0.0828847	10	10	all	0.756445	0.0168893	10	10	all	0.867059	0.0374087	10	10
ARHGAP30	all	0.36184	0.00540683	10	10	all	0.508782	-0.00880744	10	10	all	0.149039	-0.00261077	10	10	all	0.383428	0.0625472	10	10	all	0.118096	0.128251	10	10	all	0.193488	0.0677843	10	10	all	0.230117	0.0306455	10	10	all	0.221289	0.0983873	10	10	all	0.201432	0.0420685	10	10
ARHGAP31	all	0.492516	0.00105045	10	10	all	0.304538	-0.00307693	10	10	all	0.825524	-0.00498525	10	10	all	0.616051	0.0462056	10	10	all	0.627472	0.0263512	10	10	all	0.472166	0.0294412	10	10	all	0.759055	0.0563439	10	10	all	0.945306	-0.0139301	10	10	all	0.624472	0.0298398	10	10
ARHGAP32	all	0.116799	-0.0024877	10	10	all	0.132407	0.00885327	10	10	all	0.976771	0.0034568	10	10	all	0.651274	0.0655557	10	10	all	0.672959	0.0704347	10	10	all	0.71486	0.108041	10	10	all	0.99049	0.04857	10	10	all	0.273124	0.0587122	10	10	all	0.529541	0.0797909	10	10
ARHGAP33	all	0.241839	0.0140446	10	10	all	0.268502	-0.0374954	10	10	all	0.41896	-0.0140081	10	10	all	0.111974	-0.132474	10	10	all	0.628234	0.0364064	10	10	all	0.383209	-0.032718	10	10	all	0.174824	-0.0974352	10	10	all	0.603556	-0.00154645	10	10	all	0.281019	-0.0436001	10	10
ARHGAP35	all	0.607983	0.0109513	10	10	all	0.577362	-0.00716062	10	10	all	0.669515	0.00174008	10	10	all	0.654331	0.0197916	10	10	all	0.463426	0.0195025	10	10	all	0.50412	-0.0104949	10	10	all	0.639387	0.0215457	10	10	all	0.883687	0.0287744	10	10	all	0.767267	0.025865	10	10
ARHGAP39	ENST00000276826.5	0.0944678	-0.0238712	10	10	ENST00000276826.5	0.591529	0.00832831	10	10	ENST00000276826.5	0.646611	-0.0107466	10	10	ENST00000276826.5	0.112306	-0.150416	10	10	ENST00000276826.5	0.0330682	-0.139536	10	10	ENST00000276826.5	0.0536168	-0.141604	10	10	ENST00000276826.5	0.0439529	-0.141071	10	10	ENST00000276826.5	0.244656	-0.138792	10	10	ENST00000276826.5	0.0612241	-0.134956	10	10
ARHGAP4	all	0.251024	0.0139824	10	10	all	0.502749	-0.00630351	10	10	all	0.995714	0.00483175	10	10	all	0.282838	-0.151098	10	10	all	0.358882	-0.0349674	10	10	all	0.16099	-0.0598906	10	10	all	0.374344	-0.0754059	10	10	all	0.186741	-0.0206967	10	10	all	0.179802	-0.0496851	10	10
ARHGAP40	all	0.433882	-0.0064208	10	10	all	0.183518	-0.00717553	10	10	all	0.164593	-0.00643745	10	10	all	0.585222	0.0516918	10	10	all	0.817162	0.102885	10	10	all	0.619201	0.0565822	10	10	all	0.450384	-0.0203539	10	10	all	0.473636	0.08031	10	10	all	0.425874	0.0316722	10	10
ARHGAP42	all	0.460653	-0.0101495	10	10	all	0.660373	0.00553026	10	10	all	0.697828	-0.00196206	10	10	all	0.822831	0.0173192	10	10	all	0.878383	-0.0265015	10	10	all	0.830992	-0.0327327	10	10	all	0.934093	-0.0354175	10	10	all	0.639565	0.0110068	10	10	all	0.596896	0.00553456	10	10
ARHGAP44	all	0.466856	-0.020539	10	10	all	0.875696	-0.0322756	10	10	all	0.352775	-0.0225985	10	10	all	0.305678	-0.0377012	10	10	all	0.241803	-0.0963637	9	9	all	0.196363	-0.103784	9	9	all	0.185056	-0.0812698	10	10	all	0.25653	-0.108291	10	10	all	0.181053	-0.0897954	10	10
ARHGAP5	ENST00000556611.1,ENST00000539826.2	0.0693114	-0.0463152	10	10	ENST00000556611.1,ENST00000539826.2	0.225841	-0.0403221	10	10	ENST00000556611.1,ENST00000539826.2	0.0724821	-0.0423864	10	10	ENST00000345122.3,ENST00000432921.1	0.0849544	-0.145762	9	9	ENST00000345122.3,ENST00000432921.1	0.069287	-0.110244	8	8	ENST00000345122.3,ENST00000432921.1	0.088157	-0.0949086	8	8	ENST00000345122.3,ENST00000432921.1	0.0816657	-0.158406	9	9	ENST00000556611.1,ENST00000539826.2	0.0113638	-0.12006	10	10	ENST00000556611.1,ENST00000539826.2	0.0527592	-0.122953	10	10
ARHGAP6	ENST00000380736.1	0.233956	-0.0416553	10	10	ENST00000380736.1	0.18759	-0.034373	10	10	ENST00000380736.1	0.206783	-0.0380141	10	10	ENST00000303025.6	0.186375	-0.0270926	5	5	ENST00000337414.4	0.562811	0.0325372	10	10	ENST00000303025.6	0.566535	-0.0150038	5	5	ENST00000303025.6	0.182751	-0.0193351	5	5	ENST00000303025.6	0.309492	0.0302423	5	5	ENST00000380736.1	0.479528	-0.0494342	10	10
ARHGAP8	ENST00000517296.3,ENST00000389773.5	0.129394	-0.0161442	10	10	ENST00000517296.3,ENST00000389773.5	0.403423	0.00600404	10	10	ENST00000389774.2,ENST00000356099.6	0.654037	-0.00606511	8	8	ENST00000389774.2,ENST00000356099.6	0.170578	-0.0960796	9	9	ENST00000517296.3,ENST00000389773.5	0.528992	0.0676996	10	10	ENST00000389774.2,ENST00000356099.6	0.0548114	0.0242669	8	8	ENST00000389774.2,ENST00000356099.6	0.109841	-0.0956936	9	9	ENST00000517296.3,ENST00000389773.5	0.325733	0.0544688	10	10	ENST00000389774.2,ENST00000356099.6	0.0750545	0.0141613	8	8
ARHGAP9	ENST00000430041.2	0.125487	0.00546431	10	10	ENST00000430041.2	0.156516	0.0207343	10	10	ENST00000430041.2	0.0173226	0.0117633	10	10	ENST00000393791.3,ENST00000356411.2	0.390689	-0.0299312	10	10	ENST00000393791.3,ENST00000356411.2	0.563307	0.0403329	10	10	ENST00000393791.3,ENST00000356411.2	0.502893	-0.0244852	10	10	ENST00000393791.3,ENST00000356411.2	0.53686	-0.0538988	10	10	ENST00000430041.2	0.307295	0.0501571	10	10	ENST00000393791.3,ENST00000356411.2	0.546031	-0.0213655	10	10
ARHGDIA	ENST00000541078.2	0.0813421	-0.0196623	10	10	ENST00000580685.1	0.179172	0.00397073	8	8	ENST00000269321.7	0.304678	0.00561972	7	7	ENST00000541078.2	0.33069	0.0452228	10	10	ENST00000269321.7	0.323155	0.0422214	7	7	ENST00000541078.2	0.330175	0.0290872	10	10	ENST00000541078.2	0.683811	0.0152674	10	10	ENST00000269321.7	0.217512	0.0308464	7	7	ENST00000541078.2	0.53809	0.0214412	10	10
ARHGDIB	ENST00000228945.4,ENST00000541546.1	0.085306	-0.0161837	10	10	ENST00000541644.1	0.138439	-0.000982233	10	10	ENST00000541644.1	0.0800893	0.00672422	10	10	ENST00000541644.1	0.49656	-0.138863	10	10	ENST00000228945.4,ENST00000541546.1	0.424314	0.101442	10	10	ENST00000541644.1	0.502316	-0.114581	10	10	ENST00000228945.4,ENST00000541546.1	0.586698	-0.042743	10	10	ENST00000228945.4,ENST00000541546.1	0.69884	0.0114503	10	10	ENST00000228945.4,ENST00000541546.1	0.501001	-0.0128051	10	10
ARHGDIG	all	0.732543	0.0046815	10	10	all	0.151652	-0.00610302	10	10	all	0.289842	-0.0111652	10	10	all	0.0344852	-0.0892776	10	10	all	0.857609	-0.00248519	10	10	all	0.22188	-0.00850865	10	10	all	0.0317303	-0.0770902	10	10	all	0.747402	-0.00031564	10	10	all	0.129821	-0.0165764	10	10
ARHGEF1	ENST00000354532.3	0.0260769	-0.0322	10	10	ENST00000337665.4	0.306011	-0.0320174	9	9	ENST00000337665.4	0.184546	-0.0141957	9	9	ENST00000354532.3	0.0266884	0.102887	10	10	ENST00000337665.4	0.145596	-0.0325967	9	9	ENST00000354532.3	0.0655875	0.0649993	9	9	ENST00000337665.4	0.0619209	-0.0675481	9	9	ENST00000337665.4	0.158826	-0.128352	9	9	ENST00000337665.4	0.0833919	-0.0937684	9	9
ARHGEF10	all	0.00166308	-0.0187779	10	10	all	0.193445	0.0174228	10	10	all	0.643527	-0.00420411	10	10	all	0.878383	-0.0550181	10	10	all	0.585533	-0.0322624	10	10	all	0.716466	0.0139828	10	10	all	0.477051	-0.0703171	10	10	all	0.882128	0.0331023	10	10	all	0.753575	-0.00167844	10	10
ARHGEF10L	ENST00000375415.1	0.0662764	0.0190221	10	10	ENST00000375415.1	0.422605	-0.000760005	10	10	ENST00000375415.1	0.435749	0.0122729	10	10	ENST00000452522.1	0.237255	0.0254889	10	10	ENST00000375415.1	0.622749	-0.0299069	10	10	ENST00000452522.1	0.30247	0.00420859	10	10	ENST00000452522.1	0.131159	0.0221751	10	10	ENST00000375415.1	0.454989	-0.0246498	10	10	ENST00000452522.1	0.266499	0.00201625	10	10
ARHGEF11	ENST00000361409.2	0.0293095	0.060393	7	7	ENST00000361409.2	0.344424	0.00365761	6	6	ENST00000361409.2	0.106378	0.014938	6	6	ENST00000361409.2	0.256899	-0.0253236	7	7	ENST00000368194.3	0.282285	-0.0792613	8	8	ENST00000361409.2	0.315067	-0.0267181	7	7	ENST00000368194.3	0.666304	0.0890329	9	9	ENST00000368194.3	0.116075	-0.151912	9	9	ENST00000361409.2	0.450973	0.0220813	7	7
ARHGEF12	all	0.737566	0.00395733	10	10	all	0.0677133	-0.0115847	10	10	all	0.139956	-0.00773599	10	10	all	0.335065	-0.0869765	10	10	all	0.0171762	-0.18548	10	10	all	0.076939	-0.158174	10	10	all	0.301036	-0.0742671	10	10	all	0.00339151	-0.160053	10	10	all	0.0391168	-0.136838	10	10
ARHGEF15	ENST00000361926.3	0.458344	-0.0124444	9	9	ENST00000361926.3	0.165183	-0.0560764	10	10	ENST00000361926.3	0.311387	-0.0204531	9	9	ENST00000361926.3	0.399665	0.030035	9	9	ENST00000421050.1	0.323492	0.03197	10	10	ENST00000361926.3	0.373958	0.0345831	8	8	ENST00000361926.3	0.513544	0.0130887	9	9	ENST00000421050.1	0.187496	-0.0633296	10	10	ENST00000421050.1	0.537493	-0.00578966	10	10
ARHGEF16	all	0.171314	-0.0602672	8	8	all	0.0408082	-0.0476409	8	8	all	0.0228715	-0.0513685	8	8	all	0.685413	0.0837251	8	8	all	0.295445	0.0227792	8	8	all	0.591376	0.0447784	8	8	all	0.0696922	-0.0319155	8	8	all	0.626066	-0.103415	8	8	all	0.289657	-0.0421127	8	8
ARHGEF17	all	0.212246	-0.0241318	9	9	all	0.0571308	-0.0331608	9	9	all	0.0115549	-0.0203592	9	9	all	0.25621	-0.0963661	9	9	all	0.286886	0.0546306	10	10	all	0.158753	-0.147687	9	9	all	0.146532	-0.184053	9	9	all	0.0234487	-0.0325333	10	10	all	0.0348687	-0.137597	9	9
ARHGEF18	ENST00000359920.6	0.539038	0.0140234	9	9	ENST00000359920.6	0.415641	0.000840284	9	9	ENST00000359920.6	0.687241	0.012305	9	9	ENST00000319670.9	0.216259	-0.0608186	10	10	ENST00000359920.6	0.319589	0.0409782	9	9	ENST00000319670.9	0.308991	-0.0580893	10	10	ENST00000319670.9	0.195316	-0.100442	10	10	ENST00000359920.6	0.424287	0.0361471	9	9	ENST00000319670.9	0.295023	-0.0877939	10	10
ARHGEF19	all	0.76614	-0.0113896	9	9	all	0.0436205	0.0140188	9	9	all	0.371988	0.00244387	9	9	all	0.625615	-0.000611233	9	9	all	0.686426	-0.0580783	9	9	all	0.555752	-0.00395386	9	9	all	0.553373	-0.0140053	9	9	all	0.721623	0.0184633	9	9	all	0.796741	0.000707259	9	9
ARHGEF2	all	0.225694	0.0123576	10	10	all	0.295711	0.0176986	10	10	all	0.0686997	0.0109725	10	10	all	0.731464	0.0154872	10	10	all	0.130047	-0.092695	10	10	all	0.44919	-0.0372222	10	10	all	0.464852	0.024436	10	10	all	0.42898	-0.0456634	10	10	all	0.921775	0.00401415	10	10
ARHGEF25	all	0.00158703	0.0307413	10	10	all	0.581886	-0.0109576	10	10	all	0.0876172	0.0182181	10	10	all	0.942814	-0.0327043	10	10	all	0.343118	0.0405754	10	10	all	0.465774	-0.0208327	10	10	all	0.0842347	0.0211023	10	10	all	0.431422	0.0214481	10	10	all	0.134202	0.0136828	10	10
ARHGEF28	ENST00000513042.2	0.116298	0.0208207	9	9	ENST00000426542.2	0.0840911	-0.0150858	10	10	ENST00000513042.2	0.152274	0.0124696	9	9	ENST00000426542.2	0.131907	0.0653738	10	10	ENST00000426542.2	0.301401	0.0255024	10	10	ENST00000426542.2	0.104	0.0438591	10	10	ENST00000426542.2	0.0658436	0.0251953	10	10	ENST00000426542.2	0.519013	0.00408066	10	10	ENST00000426542.2	0.111581	0.0144677	10	10
ARHGEF3	all	0.617758	-0.00764105	8	8	all	0.971983	0.00628496	8	8	all	0.924401	0.000700808	8	8	all	0.273275	0.0311694	8	8	all	0.289476	-0.0463636	8	8	all	0.897128	-0.0314799	8	8	all	0.289221	0.0231847	8	8	all	0.282945	-0.0360713	8	8	all	0.950554	-0.00164924	8	8
ARHGEF37	all	0.894316	0.0054169	9	9	all	0.135014	0.0120295	9	9	all	0.284079	0.00583059	9	9	all	0.439429	-0.0429859	9	9	all	0.0373032	-0.0994177	9	9	all	0.0458305	-0.0273413	9	9	all	0.29475	-0.0197203	9	9	all	0.103877	-0.0351851	9	9	all	0.0770731	-0.0119759	9	9
ARHGEF38	all	0.0466692	-0.0208696	10	10	all	0.998017	0.0203861	10	10	all	0.434086	-0.00369553	10	10	all	0.816679	0.0728417	10	10	all	0.390501	-0.022606	10	10	all	0.783398	0.0240591	10	10	all	0.387515	0.0477151	10	10	all	0.882395	-0.018119	10	10	all	0.450927	0.032299	10	10
ARHGEF39	all	0.585105	0.00784306	10	10	all	0.892062	0.00344437	10	10	all	0.672565	0.00489216	10	10	all	0.103013	0.0775429	10	10	all	0.679283	0.0126462	10	10	all	0.244453	0.0463531	10	10	all	0.0752877	0.0475642	10	10	all	0.58728	0.0137514	10	10	all	0.136777	0.0554898	10	10
ARHGEF4	ENST00000355771.3	0.0663512	0.0184544	4	4	ENST00000355771.3	0.177105	-0.0243906	4	4	ENST00000355771.3	0.694835	-0.00447209	4	4	ENST00000355771.3	0.00930785	-0.180718	4	4	ENST00000355771.3	0.0225484	-0.10717	4	4	ENST00000355771.3	0.0108651	-0.143944	4	4	ENST00000355771.3	0.0257213	-0.129172	4	4	ENST00000355771.3	0.0151041	-0.129523	4	4	ENST00000355771.3	0.0159138	-0.129347	4	4
ARHGEF40	all	0.283998	0.00398229	10	10	all	0.958685	0.011882	10	10	all	0.228983	0.00386051	10	10	all	0.325295	0.0508303	10	10	all	0.694377	0.0604713	10	10	all	0.75382	0.0411288	10	10	all	0.368059	0.0509165	10	10	all	0.456422	0.0745731	10	10	all	0.909485	0.0472635	10	10
ARHGEF5	all	0.381494	-0.0149275	10	10	all	0.428083	0.0138104	10	10	all	0.842293	-0.00920974	10	10	all	0.27433	0.123632	9	9	all	0.222968	0.0274626	10	10	all	0.881666	0.0691517	9	9	all	0.558488	0.0345721	10	10	all	0.868482	0.0397883	9	9	all	0.659646	0.0371802	9	9
ARHGEF6	all	0.847567	-0.00925984	10	10	all	0.768336	0.0309806	10	10	all	0.78518	0.015751	10	10	all	0.458785	0.103629	10	10	all	0.467157	0.000850048	10	10	all	0.419131	0.0237762	10	10	all	0.671162	0.0607817	10	10	all	0.137982	0.0135422	10	10	all	0.303232	0.0298977	10	10
ARHGEF7	all	0.953604	-0.00689065	10	10	all	0.304272	0.00269924	10	10	all	0.583125	-0.0038067	10	10	all	0.665713	0.0117234	10	10	all	0.385654	0.0810466	10	10	all	0.441764	0.0244682	10	10	all	0.877623	0.0207085	10	10	all	0.176859	0.0630132	10	10	all	0.353998	0.0234832	10	10
ARHGEF9	all	0.346434	-0.0162404	9	9	all	0.550148	-0.0264438	9	9	all	0.315968	-0.0137829	9	9	all	0.168063	-0.111817	9	9	all	0.581544	-0.00494346	9	9	all	0.197772	-0.0682871	9	9	all	0.0433575	-0.0923355	9	9	all	0.173853	-0.00542217	9	9	all	0.0421004	-0.0593678	9	9
ARID1A	ENST00000457599.2	0.0423836	0.0190544	10	10	ENST00000457599.2	0.0306469	0.025012	10	10	ENST00000457599.2	0.023332	0.0203598	10	10	ENST00000457599.2	0.0673231	0.0408666	10	10	ENST00000457599.2	0.432356	-0.0470336	10	10	ENST00000457599.2	0.258203	0.0376945	10	10	ENST00000457599.2	0.0186818	0.102663	10	10	ENST00000457599.2	0.108401	0.0231187	10	10	ENST00000457599.2	0.0717238	0.0886884	10	10
ARID1B	all	0.77549	0.00407372	10	10	all	0.270561	0.0118999	10	10	all	0.244207	0.00180304	10	10	all	0.169859	-0.0560807	10	10	all	0.460776	-0.00668136	10	10	all	0.221409	-0.012858	10	10	all	0.263309	-0.0543826	10	10	all	0.787589	-0.00124539	10	10	all	0.42831	-0.0120691	10	10
ARID2	all	5.12841e-05	-0.0743854	10	10	all	0.000672193	-0.0623811	10	10	all	0.00015045	-0.0681618	10	10	all	2.47446e-05	0.351898	10	10	all	4.82422e-05	0.341952	10	10	all	3.6387e-05	0.346809	10	10	all	0.00016557	0.206522	10	10	all	8.00512e-05	0.0656934	10	10	all	7.74775e-05	0.197158	10	10
ARID3A	all	0.140583	-0.0328935	9	9	all	0.0142572	-0.0382357	9	9	all	0.0359264	-0.0355646	9	9	all	0.743427	0.00148553	9	9	all	0.934131	0.0348785	9	9	all	0.69221	0.00672661	9	9	all	0.195694	-0.00600817	9	9	all	0.0814371	-0.0249325	9	9	all	0.0920861	-0.0146478	9	9
ARID3B	all	0.346294	-0.0249097	10	10	all	0.00125038	-0.0204692	10	10	all	0.00506412	-0.0187754	10	10	all	0.682018	0.034713	10	10	all	0.156342	-0.01712	10	10	all	0.255401	-0.00644654	10	10	all	0.399857	-0.0595428	10	10	all	0.010027	-0.0303324	10	10	all	0.0283005	-0.0548226	10	10
ARID3C	all	0.150767	0.00717359	9	9	all	0.315735	-0.0213178	9	9	all	0.903936	-0.00398839	9	9	all	0.496001	-0.0499804	9	9	all	0.768342	-0.0118401	9	9	all	0.813831	-0.00982837	9	9	all	0.952802	0.00827602	9	9	all	0.809556	-0.0640312	9	9	all	0.887022	-0.0207119	9	9
ARID4A	all	0.272017	-0.0181123	9	9	all	0.352549	-0.0100333	9	9	all	0.340493	-0.0161635	9	9	all	0.896031	-0.0225341	9	9	all	0.238987	0.0622295	9	9	all	0.316562	0.0183853	9	9	all	0.647194	-0.0200978	9	9	all	0.578752	0.0716733	9	9	all	0.713721	-0.0151602	9	9
ARID4B	ENST00000264183.3	0.0258427	-0.0929838	10	10	ENST00000264183.3	0.0869167	-0.108654	10	10	ENST00000264183.3	0.0239737	-0.104854	10	10	ENST00000264183.3	4.78382e-07	0.259677	10	10	ENST00000264183.3	2.27868e-06	0.27979	10	10	ENST00000264183.3	3.81909e-07	0.269734	10	10	ENST00000264183.3	9.44986e-05	0.014859	10	10	ENST00000264183.3	0.00026905	0.00179037	10	10	ENST00000264183.3	7.12464e-05	0.00605518	10	10
ARID5A	all	0.0610082	-0.0229373	10	10	all	0.234419	-0.00351572	10	10	all	0.0500042	-0.0107133	10	10	all	0.000204173	0.10895	10	10	all	0.0657978	0.026491	10	10	all	0.00181515	0.0786387	10	10	all	0.00199328	0.0675935	10	10	all	0.180709	0.0284049	10	10	all	0.0151142	0.0641716	10	10
ARID5B	all	0.813958	-0.00967658	10	10	all	0.193251	0.0113614	10	10	all	0.426287	0.00128272	10	10	all	0.760392	-0.0213675	10	10	all	0.374121	-0.038132	10	10	all	0.660724	-0.0200383	10	10	all	0.918431	-0.0063596	10	10	all	0.663157	-0.0489629	10	10	all	0.798095	-0.00764239	10	10
ARIH1	all	0.00178689	-0.0874888	10	10	all	0.0499027	-0.086103	10	10	all	0.00541747	-0.0867959	10	10	all	0.000962519	0.290321	10	10	all	7.64131e-06	0.29733	10	10	all	5.0125e-05	0.293825	10	10	all	0.0216816	0.0486406	10	10	all	0.000172574	0.0229192	10	10	all	0.00115618	0.0357799	10	10
ARIH2	all	0.936878	-0.00468749	10	10	all	0.259899	-0.00364219	10	10	all	0.204999	5.29752e-05	10	10	all	0.0275518	-0.255349	10	10	all	0.0542595	-0.246536	10	10	all	0.0417862	-0.250942	10	10	all	0.010815	-0.197648	10	10	all	0.032135	-0.203109	10	10	all	0.0189608	-0.197756	10	10
ARIH2OS	all	0.350009	-0.00621948	10	10	all	0.638423	-0.013964	10	10	all	0.272184	-0.00421595	10	10	all	0.105812	-0.0877005	10	10	all	0.0152668	-0.111426	10	10	all	0.0115294	-0.0809145	10	10	all	0.0387913	-0.0735696	10	10	all	0.00918611	-0.0908869	10	10	all	0.00646403	-0.0745834	10	10
ARL1	all	0.000329095	-0.0681982	10	10	all	1.30582e-05	-0.0565723	10	10	all	4.3277e-06	-0.0620439	10	10	all	1.91622e-05	0.319339	10	10	all	3.49001e-05	0.311962	10	10	all	2.03358e-05	0.315651	10	10	all	6.13793e-05	0.144888	10	10	all	0.000355588	0.157239	10	10	all	0.000140145	0.14774	10	10
ARL11	all	0.137266	-0.0191843	10	10	all	0.0191948	-0.0250721	10	10	all	0.0116939	-0.0197099	10	10	all	0.509981	0.0450172	9	9	all	0.76393	0.07599	9	9	all	0.628443	0.0605036	9	9	all	0.85984	-0.100176	10	10	all	0.554217	-0.084403	10	10	all	0.773665	-0.0922897	10	10
ARL13B	all	0.272951	-0.0185834	10	10	all	0.564426	-0.00754889	10	10	all	0.325641	-0.0087489	10	10	all	0.297294	0.053958	10	10	all	0.0994801	-0.0383587	10	10	all	0.618962	-0.0103099	10	10	all	0.724566	0.0280289	10	10	all	0.0719685	-0.071612	10	10	all	0.339112	-0.0375247	10	10
ARL14	all	0.295561	-0.00738656	8	8	all	0.194737	0.0251614	8	8	all	0.34173	0.0016943	8	8	all	0.952774	0.022648	8	8	all	0.580703	-0.0414414	8	8	all	0.820324	-0.0357885	8	8	all	0.733862	-0.0348872	8	8	all	0.504762	-0.0381791	8	8	all	0.957603	0.00696307	8	8
ARL14EP	all	0.921929	0.00525186	10	10	all	0.0325294	-0.0198633	10	10	all	0.155712	-0.0141192	10	10	all	0.0164769	0.110992	10	10	all	0.0284679	0.126151	10	10	all	0.0180722	0.110793	10	10	all	0.0174614	0.0927827	10	10	all	0.109586	0.081593	10	10	all	0.0317511	0.0807932	10	10
ARL15	all	6.40754e-05	0.0277481	10	10	all	0.389113	-0.00777914	10	10	all	0.0244291	0.0219528	10	10	all	0.193479	0.1308	10	10	all	0.240433	0.142258	10	10	all	0.156606	0.151485	10	10	all	0.00785582	0.185143	10	10	all	0.0971374	0.0540717	10	10	all	0.0228612	0.141591	10	10
ARL16	all	0.381555	0.0095507	10	10	all	0.141717	0.028242	10	10	all	0.0778333	0.0107861	10	10	all	0.442901	-0.0314989	10	10	all	0.79249	0.00431393	10	10	all	0.522059	0.0203613	10	10	all	0.682152	0.019407	10	10	all	0.516418	0.043711	10	10	all	0.742693	0.0256743	10	10
ARL17A	all	0.397332	-0.021084	10	10	all	0.517883	0.0149722	10	10	all	0.774681	-0.00358317	10	10	all	0.0389333	0.106995	10	10	all	0.552405	0.0436587	10	10	all	0.0817238	0.0722942	10	10	all	0.110331	0.0787597	10	10	all	0.513029	0.0746045	10	10	all	0.16211	0.0663197	10	10
ARL2	all	0.0938127	-0.101262	10	10	all	0.0596229	-0.108493	10	10	all	0.0972699	-0.104878	10	10	all	0.337138	0.0322189	10	10	all	0.0942966	-0.0976129	10	10	all	0.127226	-0.0263496	10	10	all	0.102927	-0.223602	10	10	all	0.00549524	-0.235911	10	10	all	0.00982813	-0.229757	10	10
ARL2BP	all	0.529955	-0.0168062	10	10	all	0.683075	-0.0190537	10	10	all	0.731581	-0.00851582	10	10	all	0.517331	-0.0289733	10	10	all	0.898658	0.0282083	10	10	all	0.719935	-0.0223519	10	10	all	0.581305	-0.0674785	10	10	all	0.569522	0.0132328	10	10	all	0.652829	-0.0666967	10	10
ARL3	all	0.777915	-0.0021625	10	10	all	0.909729	-0.00550285	10	10	all	0.764999	-9.71536e-05	10	10	all	0.870454	0.0293284	10	10	all	0.152271	0.101685	10	10	all	0.30604	0.0707905	10	10	all	0.852348	0.0380299	10	10	all	0.136786	0.0381243	10	10	all	0.287169	0.0414515	10	10
ARL4A	ENST00000396663.1,ENST00000404894.1	0.150919	-0.00888265	3	3	ENST00000396663.1,ENST00000404894.1	0.0767244	0.0115854	3	3	ENST00000396662.1,ENST00000356797.3,ENST00000396664.2	0.617889	-0.0169364	10	10	ENST00000396663.1,ENST00000404894.1	0.169941	0.041677	3	3	ENST00000404894.1	0.118612	0.0539888	5	5	ENST00000396662.1,ENST00000356797.3,ENST00000396664.2	0.488002	0.0422617	10	10	ENST00000396663.1	0.455391	0.0402207	6	6	ENST00000404894.1	0.123734	0.0527509	5	5	ENST00000404894.1	0.498893	0.0122963	5	5
ARL4C	all	0.964947	0.00310432	10	10	all	0.0610829	0.0172403	10	10	all	0.161693	0.0089361	10	10	all	0.313157	0.0454293	10	10	all	0.482952	-0.0459279	10	10	all	0.79892	0.0220111	10	10	all	0.247428	0.035274	10	10	all	0.984278	0.0147878	10	10	all	0.542278	0.0250309	10	10
ARL4D	all	0.577826	0.00521657	10	10	all	0.50661	-0.00220297	10	10	all	0.354829	0.00356948	10	10	all	0.598779	0.00388732	10	10	all	0.852863	0.0147986	10	10	all	0.810044	0.0285852	10	10	all	0.709919	0.00715657	10	10	all	0.539936	0.0062581	10	10	all	0.840275	0.0210662	10	10
ARL5A	all	0.355165	-0.00638064	9	9	all	0.501484	0.00414168	9	9	all	0.735816	0.00222631	9	9	all	0.0561433	-0.0176114	9	9	all	0.0488672	-0.100646	9	9	all	0.0174316	-0.0194426	9	9	all	0.0532342	-0.0384113	9	9	all	0.112769	-0.0888305	9	9	all	0.0268171	-0.0258746	9	9
ARL5B	all	0.902219	-0.00605435	10	10	all	0.264806	0.0146513	10	10	all	0.455715	0.00434516	10	10	all	0.33145	-0.108113	10	10	all	0.166908	-0.111058	10	10	all	0.176683	-0.0935324	10	10	all	0.282578	-0.0876876	10	10	all	0.285264	-0.0755723	10	10	all	0.217221	-0.0514753	10	10
ARL5C	ENST00000444555.1	0.0688792	-0.0370666	8	8	ENST00000269586.7	0.393044	0.0194277	10	10	ENST00000444555.1	0.271133	-0.025406	8	8	ENST00000269586.7	0.0169246	0.0796897	10	10	ENST00000269586.7	0.785745	-0.0239193	10	10	ENST00000269586.7	0.230125	0.0598867	10	10	ENST00000269586.7	0.12308	0.0863156	10	10	ENST00000269586.7	0.735839	0.0370919	10	10	ENST00000269586.7	0.2504	0.0564966	10	10
ARL6	ENST00000463745.1	0.0390816	-0.0271861	4	4	ENST00000335979.2,ENST00000394206.1	0.0620557	0.0175007	4	4	all	0.111334	-0.00773685	2	2	ENST00000463745.1	0.343967	0.0823059	4	4	ENST00000335979.2,ENST00000394206.1	0.0847393	-0.0532048	4	4	ENST00000335979.2,ENST00000394206.1	0.111495	-0.0434679	4	4	ENST00000335979.2,ENST00000394206.1	0.344407	-0.0244792	4	4	all	0.408702	0.0222211	2	2	ENST00000335979.2,ENST00000394206.1	0.286706	-0.0252784	4	4
ARL6IP1	all	0.158334	-0.00117892	10	10	all	0.464565	0.00845046	10	10	all	0.667622	0.00576072	10	10	all	0.396172	0.00862858	10	10	all	0.930405	-0.00438439	10	10	all	0.578317	0.0159009	10	10	all	0.762325	0.0131277	10	10	all	0.647133	0.0294701	10	10	all	0.606106	0.0192642	10	10
ARL6IP4	ENST00000543566.1,ENST00000315580.5,ENST00000392435.2	0.325466	-0.00493451	3	3	ENST00000392435.2,ENST00000453766.2	0.562914	0.002735	3	3	ENST00000543566.1,ENST00000315580.5,ENST00000392435.2	0.56706	-0.00295853	3	3	ENST00000543566.1,ENST00000315580.5,ENST00000392435.2	0.0581467	0.0625906	3	3	ENST00000543566.1,ENST00000315580.5,ENST00000392435.2	0.262596	0.0442036	3	3	ENST00000543566.1,ENST00000315580.5,ENST00000392435.2	0.0909105	0.0533971	3	3	ENST00000543566.1,ENST00000315580.5,ENST00000392435.2	0.0866387	0.043841	3	3	ENST00000543566.1,ENST00000315580.5,ENST00000392435.2	0.172266	0.0342942	3	3	ENST00000543566.1,ENST00000315580.5,ENST00000392435.2	0.0871771	0.0390676	3	3
ARL6IP5	all	0.992023	-0.00554507	10	10	all	0.700157	0.00794222	10	10	all	0.68208	0.00344075	10	10	all	0.666124	0.0196744	10	10	all	0.23424	-0.139561	10	10	all	0.381729	-0.109302	10	10	all	0.850665	-0.0330863	10	10	all	0.333887	-0.105869	10	10	all	0.412917	-0.0774902	10	10
ARL6IP6	all	0.883015	-0.0216663	10	10	all	0.838358	-0.0113229	10	10	all	0.782834	-0.0139178	10	10	all	0.248451	-0.00552878	10	10	all	0.114626	0.027829	10	10	all	0.0687752	0.0326545	10	10	all	0.148209	-0.0258374	10	10	all	0.219397	-0.0692137	10	10	all	0.0989817	-0.00591138	10	10
ARL8A	all	0.172076	0.00511027	10	10	all	0.999008	0.0064088	10	10	all	0.255703	0.00207349	10	10	all	0.175141	-0.034587	10	10	all	0.533403	-0.0188159	10	10	all	0.290892	-0.0612368	10	10	all	0.369142	-0.0203898	10	10	all	0.606591	-0.0183212	10	10	all	0.465243	-0.021217	10	10
ARL8B	all	0.546249	-0.00364442	10	10	all	0.0715015	-0.00483675	10	10	all	0.15238	-0.00505789	10	10	all	0.19738	-0.0400504	10	10	all	0.372967	-0.10048	10	10	all	0.156771	-0.0655672	10	10	all	0.108007	-0.0531992	10	10	all	0.128144	-0.0884196	10	10	all	0.0611928	-0.0618224	10	10
ARL9	all	0.945283	-0.00218947	10	10	all	0.0730068	0.0159076	10	10	all	0.249281	0.00441427	10	10	all	0.648222	0.0285559	10	10	all	0.296352	-0.0568687	10	10	all	0.565768	-0.0243298	10	10	all	0.67075	0.0042617	10	10	all	0.760742	-0.0371728	10	10	all	0.883187	-0.0133326	10	10
ARMC1	all	0.994204	-0.0201526	9	9	all	0.474993	-0.0307782	9	9	all	0.620276	-0.0171348	9	9	all	0.068306	-0.126219	9	9	all	0.111407	-0.133504	9	9	all	0.0419214	-0.120345	9	9	all	0.123948	-0.117706	9	9	all	0.11923	-0.143589	9	9	all	0.0604712	-0.13283	9	9
ARMC10	all	0.267356	0.00789677	10	10	all	0.398261	-0.0370024	10	10	all	0.550736	-0.00776966	10	10	all	0.0259692	0.281656	10	10	all	0.176241	0.206056	10	10	all	0.101779	0.288861	10	10	all	0.0107312	0.249589	10	10	all	0.163106	0.0993611	10	10	all	0.0802767	0.224094	10	10
ARMC12	all	0.800354	0.0229738	9	9	all	0.433568	0.000925433	9	9	all	0.69172	0.00896309	9	9	all	0.419253	-0.0997153	9	9	all	0.234735	-0.105601	9	9	all	0.23888	-0.0901697	9	9	all	0.422855	-0.0221054	9	9	all	0.369224	-0.0892216	9	9	all	0.329755	-0.0339998	9	9
ARMC2	all	0.783985	-0.0100862	10	10	all	0.283365	0.00785271	10	10	all	0.876218	-0.000213832	10	10	all	0.764874	0.0381306	10	10	all	0.785267	-0.0477958	10	10	all	0.977559	-0.0166902	10	10	all	0.809095	0.0420561	10	10	all	0.970678	-0.0255109	10	10	all	0.82651	0.0351285	10	10
ARMC4	all	0.846107	0.00431066	10	10	all	0.462394	-0.0539587	10	10	all	0.472694	-0.0229378	10	10	all	0.578672	0.0704586	10	10	all	0.733086	0.118425	9	9	all	0.259609	0.107715	9	9	all	0.605298	0.0819597	10	10	all	0.233218	0.0733592	10	10	all	0.272431	0.0819528	10	10
ARMC5	all	0.340054	0.00536504	10	10	all	0.0636143	-0.0222852	10	10	all	0.349562	-0.00528569	10	10	all	0.100705	-0.0329584	10	10	all	0.29087	0.00829936	10	10	all	0.233883	-0.0306362	10	10	all	0.181856	-0.0200895	10	10	all	0.20784	-0.0328369	10	10	all	0.217642	-0.00315286	10	10
ARMC6	all	0.721307	-0.00296893	10	10	all	0.641818	-0.0121921	10	10	all	0.946403	-0.00496294	10	10	all	0.213708	0.0411306	10	10	all	0.112895	0.0651245	10	10	all	0.095341	0.0653041	10	10	all	0.371012	0.0421763	10	10	all	0.22634	0.0157421	10	10	all	0.273668	0.067175	10	10
ARMC7	all	0.0360377	-0.0438824	10	10	all	0.0105043	-0.0277372	10	10	all	0.00256927	-0.030758	10	10	all	0.816591	0.0231283	10	10	all	0.346699	0.045101	10	10	all	0.702227	0.0515455	10	10	all	0.26563	-0.106267	10	10	all	0.759753	0.0273046	10	10	all	0.266499	0.0138164	10	10
ARMC8	all	0.712571	-0.0293495	10	10	all	0.53518	-0.0368268	10	10	all	0.790575	-0.0339732	10	10	all	0.344098	0.0375849	10	10	all	0.244923	0.113357	10	10	all	0.237325	0.0754709	10	10	all	0.815931	-0.0312063	10	10	all	0.847894	0.0680796	10	10	all	0.85755	0.046218	10	10
ARMC9	all	0.93306	0.00885305	10	10	all	0.616269	-0.00940776	10	10	all	0.857003	0.00446764	10	10	all	0.320041	-0.0798887	10	10	all	0.666535	0.040757	10	10	all	0.527001	0.0261372	10	10	all	0.563245	-0.112225	10	10	all	0.678179	0.0127627	10	10	all	0.779384	-0.0360409	10	10
ARMCX1	all	0.289209	-0.0181499	10	10	all	0.51183	-0.00405645	10	10	all	0.390092	-0.0206021	10	10	all	0.476208	0.0488476	10	10	all	0.522391	0.0502363	10	10	all	0.504193	0.0545911	10	10	all	0.830834	-0.0173352	10	10	all	0.70554	0.0199935	10	10	all	0.699532	0.0109669	10	10
ARMCX2	ENST00000330154.2	0.00806366	-0.0214402	10	10	ENST00000330154.2	0.371446	-0.010241	10	10	ENST00000330154.2	0.0160974	-0.0137722	10	10	ENST00000330154.2	0.0433357	0.103271	10	10	ENST00000328766.5,ENST00000356824.4	0.265916	-0.0405631	10	10	ENST00000328766.5,ENST00000356824.4	0.239488	-0.0865413	10	10	ENST00000330154.2	0.281769	0.060085	10	10	ENST00000328766.5,ENST00000356824.4	0.100284	-0.0311754	10	10	ENST00000328766.5,ENST00000356824.4	0.142319	-0.064022	10	10
ARMCX3	ENST00000471229.2	0.309292	-0.00855895	5	5	ENST00000471229.2,ENST00000537169.1	0.119998	-0.0106038	4	4	ENST00000471229.2	0.236504	-0.00529025	5	5	ENST00000341189.4	0.135161	0.045348	9	9	ENST00000341189.4,ENST00000471229.2	0.371123	-0.0417966	1	1	ENST00000341189.4	0.172888	0.0647036	9	9	ENST00000341189.4	0.238732	0.0312618	9	9	ENST00000471229.2,ENST00000537169.1	0.198139	-0.0263463	4	4	ENST00000341189.4	0.206788	0.0264515	9	9
ARMCX5	ENST00000536530.1,ENST00000604957.1	0.0547961	0.0145246	10	10	ENST00000372742.1	0.0244622	-0.012952	5	5	ENST00000372742.1	0.523374	-0.00962625	5	5	ENST00000536530.1,ENST00000604957.1	0.267596	-0.0773832	10	10	ENST00000372742.1	0.142074	0.0507388	5	5	ENST00000372742.1	0.53922	0.0141246	5	5	ENST00000372742.1	0.489053	-0.0132036	5	5	ENST00000246174.2,ENST00000537008.1,ENST00000541409.1	0.266896	-0.0811895	10	10	ENST00000246174.2,ENST00000537008.1,ENST00000541409.1	0.533844	-0.0226109	10	10
ARMCX5-GPRASP2	all	0.530769	0.0086579	10	10	all	0.566604	-0.00750661	10	10	all	0.913331	0.00386202	10	10	all	0.775202	-0.0278313	10	10	all	0.545922	-0.00233077	10	10	all	0.696359	-0.0497288	10	10	all	0.940698	0.00693741	10	10	all	0.897253	0.00940937	10	10	all	0.915672	-0.0280628	10	10
ARMCX6	all	0.505462	0.00914091	10	10	all	0.237456	-0.00857051	10	10	all	0.822179	0.000621568	10	10	all	0.336143	0.0338529	10	10	all	0.837464	0.0189314	10	10	all	0.545574	0.0188942	10	10	all	0.226279	0.0744334	10	10	all	0.478563	0.00371059	10	10	all	0.588141	0.0153069	10	10
ARMS2	all	0.220903	0.0174694	9	9	all	0.733469	-0.0057654	9	9	all	0.35055	0.00119678	9	9	all	0.210523	-0.0610598	9	9	all	0.736678	0.0404166	9	9	all	0.326934	-0.0248794	9	9	all	0.345154	-0.0316963	9	9	all	0.979012	0.0110379	9	9	all	0.368441	-0.0088306	9	9
ARNT	all	0.139862	0.016576	9	9	all	0.0591438	0.0096682	9	9	all	0.0132073	0.0125471	9	9	all	0.665817	0.0971771	9	9	all	0.237209	0.0113419	9	9	all	0.465411	0.0530961	9	9	all	0.252483	0.083914	9	9	all	0.365176	0.091141	9	9	all	0.990205	0.083563	9	9
ARNT2	all	0.605417	0.00475062	10	10	all	0.878814	-0.00314594	10	10	all	0.747631	-0.00218728	10	10	all	0.115931	0.146458	10	10	all	0.238311	0.0818842	10	10	all	0.0824609	0.0958045	10	10	all	0.0700681	0.125698	10	10	all	0.209639	0.0665459	10	10	all	0.0699244	0.0825369	10	10
ARNTL	all	0.0478913	-0.0512734	10	10	all	0.456907	-0.00918106	10	10	all	0.4174	-0.0377272	10	10	all	0.543856	-0.0488709	10	10	all	0.0162796	-0.211583	10	10	all	0.151925	-0.136017	10	10	all	0.373161	-0.118931	10	10	all	0.0353889	-0.153404	10	10	all	0.0986121	-0.158941	10	10
ARNTL2	all	0.0943454	0.0194044	10	10	all	0.588254	-0.00446041	10	10	all	0.229947	0.00353713	10	10	all	0.196439	0.0308543	10	10	all	0.639832	-0.0484252	10	10	all	0.604432	0.0169555	10	10	all	0.706348	-0.0140765	10	10	all	0.894082	-0.0283764	10	10	all	0.795826	-0.00912362	10	10
ARPC1A	all	0.880519	-0.00297701	10	10	all	0.685025	-0.0156063	10	10	all	0.591223	-0.00356097	10	10	all	0.299764	0.0184671	10	10	all	0.600783	0.0408357	10	10	all	0.76088	0.0296514	10	10	all	0.328657	0.0185358	10	10	all	0.440971	-0.0180581	10	10	all	0.833475	0.0195921	10	10
ARPC1B	all	0.650573	-0.00750371	10	10	all	0.911969	-0.00503712	10	10	all	0.916381	-0.00674728	10	10	all	0.117155	0.12295	10	10	all	0.416814	0.0339531	10	10	all	0.175922	0.0936133	10	10	all	0.119216	0.0899745	10	10	all	0.385388	0.0274605	10	10	all	0.165015	0.0674577	10	10
ARPC2	all	0.109602	-0.0494537	10	10	all	0.998377	-0.0218753	10	10	all	0.648724	-0.0434256	10	10	all	0.00625581	0.424633	10	10	all	0.153537	0.433492	10	10	all	0.0448456	0.427829	10	10	all	0.0500452	0.328598	10	10	all	0.03625	0.315782	10	10	all	0.0387743	0.32219	10	10
ARPC3	all	0.101977	-0.0149429	10	10	all	0.734261	-0.00443691	10	10	all	0.216921	-0.0110083	10	10	all	0.166908	0.101349	10	10	all	0.820281	0.173558	10	10	all	0.52974	0.163009	10	10	all	0.34054	0.0656894	10	10	all	0.719135	0.119578	10	10	all	0.54859	0.121355	10	10
ARPC4	all	0.21329	0.00618907	10	10	all	0.947256	-0.0141547	10	10	all	0.829753	0.00340525	10	10	all	0.0249656	-0.0943004	10	10	all	0.0473504	-0.0832776	10	10	all	0.0204273	-0.0827617	10	10	all	0.087576	-0.0771691	10	10	all	0.0355468	-0.0831136	10	10	all	0.0441048	-0.0801413	10	10
ARPC4-TTLL3	all	0.041214	-0.0179272	10	10	all	0.58332	-0.000671115	10	10	all	0.0802455	-0.012859	10	10	all	0.461223	0.128873	10	10	all	0.917475	0.0467031	10	10	all	0.63348	0.095027	10	10	all	0.428724	0.0542472	10	10	all	0.780039	0.0398738	10	10	all	0.404325	0.0509685	10	10
ARPC5	all	0.190987	-0.0145878	10	10	all	0.970663	-0.00599003	10	10	all	0.278454	-0.00949536	10	10	all	0.733294	0.0435121	10	10	all	0.271346	-0.0410886	10	10	all	0.675719	-0.0115549	10	10	all	0.942136	-0.0228968	10	10	all	0.279802	-0.0336466	10	10	all	0.490984	-0.0132269	10	10
ARPC5L	ENST00000259477.6	0.440581	-0.00734006	10	10	ENST00000259477.6	0.35844	-0.0169307	10	10	ENST00000259477.6	0.222958	-0.0116516	10	10	ENST00000353214.2	0.114925	-0.121494	10	10	ENST00000353214.2	0.122085	-0.0350504	10	10	ENST00000353214.2	0.0918643	-0.098421	10	10	ENST00000353214.2	0.0662263	-0.0482943	10	10	ENST00000353214.2	0.19783	-0.0457288	10	10	ENST00000353214.2	0.092606	-0.0405806	10	10
ARPP19	all	0.78251	-0.0374558	10	10	all	0.225733	0.00628212	10	10	all	0.39184	-0.0147472	10	10	all	0.0369041	0.0145654	10	10	all	0.0826713	-0.0223696	10	10	all	0.0268884	0.00978616	10	10	all	0.0784539	-0.0400841	10	10	all	0.166505	-0.0149646	10	10	all	0.0460302	-0.0114485	10	10
ARR3	all	0.628923	-0.0122231	10	10	all	0.386443	0.00366085	10	10	all	0.580335	-0.0137117	10	10	all	0.0964295	-0.0611385	10	10	all	0.125577	0.0423889	10	10	all	0.95951	-0.00140941	10	10	all	0.124584	-0.0680877	10	10	all	0.314602	0.043381	10	10	all	0.655032	0.0130042	10	10
ARRB1	all	0.586193	0.00588658	10	10	all	0.0966698	0.00984855	10	10	all	0.122829	0.0109532	10	10	all	0.41232	0.0912738	10	10	all	0.233308	-0.00317242	10	10	all	0.281887	0.0440507	10	10	all	0.224938	0.0658532	10	10	all	0.114143	0.0187087	10	10	all	0.122019	0.0408664	10	10
ARRB2	all	0.663492	0.00541234	9	9	all	0.539862	0.00183167	9	9	all	0.658793	0.00476834	9	9	all	0.12423	-0.0798728	9	9	all	0.518745	0.0169826	9	9	all	0.860057	-0.0173024	9	9	all	0.080092	-0.070336	9	9	all	0.293224	0.00968072	9	9	all	0.713188	-0.0242866	9	9
ARRDC1	all	0.0671321	0.0213547	10	10	all	0.390296	-0.00579584	10	10	all	0.311866	-0.00180911	10	10	all	0.762374	0.05979	10	10	all	0.527217	0.142434	10	10	all	0.992368	0.134798	10	10	all	0.789547	0.14885	10	10	all	0.710118	0.113796	10	10	all	0.916659	0.123774	10	10
ARRDC2	all	0.689836	0.0098374	10	10	all	0.766567	-0.00430014	10	10	all	0.782399	0.00347025	10	10	all	0.795759	0.0143424	10	10	all	0.346293	-0.0316397	10	10	all	0.743952	0.0033996	10	10	all	0.696883	0.0260767	10	10	all	0.309226	-0.0367612	10	10	all	0.773145	0.00877631	10	10
ARRDC3	all	0.843454	0.00163051	10	10	all	0.131494	0.028935	10	10	all	0.253064	0.0140423	10	10	all	0.055315	0.12313	10	10	all	0.347917	0.114503	10	10	all	0.178905	0.114801	10	10	all	0.183507	0.133493	10	10	all	0.043024	0.110046	10	10	all	0.116156	0.117515	10	10
ARRDC4	all	0.734074	-0.0105728	10	10	all	0.495718	-0.0132194	10	10	all	0.821476	-0.00807513	10	10	all	0.762287	0.0273287	10	10	all	0.607328	-0.0433182	10	10	all	0.790974	-0.0222137	10	10	all	0.806907	0.0222456	10	10	all	0.504266	-0.09688	10	10	all	0.842221	-0.0708259	10	10
ARSA	all	0.0470255	-0.0125565	10	10	all	0.968321	0.00467036	10	10	all	0.214364	-0.00902054	10	10	all	0.912318	0.0330343	10	10	all	0.802615	0.0268814	10	10	all	0.769172	0.0281661	10	10	all	0.441821	-0.0194859	10	10	all	0.923486	-0.0168549	10	10	all	0.561322	0.00784336	10	10
ARSB	all	0.466787	-0.0515532	10	10	all	0.14071	-0.0447152	10	10	all	0.614229	-0.0429817	10	10	all	0.01161	-0.111778	10	10	all	0.0788335	-0.0604276	10	10	all	0.0163689	-0.103412	10	10	all	0.0439885	-0.170323	10	10	all	0.0282357	-0.156615	10	10	all	0.0225047	-0.155329	10	10
ARSD	all	0.95023	-0.00842785	10	10	all	0.415451	-0.00559419	10	10	all	0.405297	-0.00409169	10	10	all	0.89669	0.049313	10	10	all	0.494058	-0.013074	10	10	all	0.87618	0.0492516	10	10	all	0.822957	0.0462353	10	10	all	0.660414	-0.0160217	10	10	all	0.970552	0.0364514	10	10
ARSE	all	0.716575	-0.0189349	10	10	all	0.158291	-0.0410702	10	10	all	0.17335	-0.0240042	10	10	all	0.120226	0.125944	10	10	all	0.115408	0.171448	10	10	all	0.0858139	0.139147	10	10	all	0.391187	0.102397	10	10	all	0.343896	0.079595	10	10	all	0.216716	0.0472382	10	10
ARSG	all	0.16936	-0.0779669	10	10	all	0.80374	-0.0685753	10	10	all	0.237719	-0.072541	10	10	all	0.295882	0.189134	10	10	all	0.191242	0.150619	10	10	all	0.162892	0.131313	10	10	all	0.957429	-0.0142504	10	10	all	0.628664	-0.0412449	10	10	all	0.968659	0.00280393	10	10
ARSJ	all	0.38294	0.00748061	10	10	all	0.834916	-0.0163596	10	10	all	0.607728	0.0032105	10	10	all	0.859252	-0.0486995	10	10	all	0.160614	0.0924048	10	10	all	0.436408	0.0120963	10	10	all	0.712107	-0.00787567	10	10	all	0.272383	0.0295167	10	10	all	0.322528	0.00532619	10	10
ARSK	all	0.000362157	-0.0368598	10	10	all	3.87234e-05	-0.0351339	10	10	all	1.19715e-05	-0.0339352	10	10	all	0.0449177	0.109901	10	10	all	0.000940834	0.13681	10	10	all	0.00170076	0.106171	10	10	all	0.774495	0.0334923	10	10	all	0.12672	0.0788567	10	10	all	0.365204	0.0241985	10	10
ART1	all	0.837227	-0.0016012	10	10	all	0.826589	-0.00626747	10	10	all	0.940553	-0.00438889	10	10	all	0.705011	0.00759004	10	10	all	0.589426	0.0354501	10	10	all	0.765973	0.000623557	10	10	all	0.761206	-0.0301009	10	10	all	0.60904	0.0358253	10	10	all	0.77869	0.00132541	10	10
ART5	all	0.649963	0.0142922	10	10	all	0.895815	-0.0144302	10	10	all	0.316541	0.00855908	10	10	all	0.303255	-0.0125398	10	10	all	0.289761	-0.113611	10	10	all	0.264741	-0.0894773	10	10	all	0.408546	0.0165127	10	10	all	0.300154	-0.120369	10	10	all	0.217052	-0.0845885	10	10
ARTN	ENST00000372354.3	0.379514	0.0152966	5	5	ENST00000498139.2	0.107909	-0.0231969	10	10	ENST00000498139.2	0.259793	-0.0266606	10	10	ENST00000372354.3	0.0490822	0.111067	5	5	ENST00000372354.3	0.0632701	0.0973573	5	5	ENST00000372354.3	0.00964919	0.0766808	5	5	ENST00000372354.3	0.0113252	0.104851	5	5	ENST00000372354.3	0.0254296	0.0967599	5	5	ENST00000372354.3	0.00220864	0.0859179	5	5
ARV1	all	0.489849	-0.00898704	10	10	all	0.513103	0.0125249	10	10	all	0.741129	0.00165725	10	10	all	0.848122	0.0121504	10	10	all	0.962308	-0.000822978	10	10	all	0.957797	-0.0263838	10	10	all	0.624239	-0.0285646	10	10	all	0.806548	0.026969	10	10	all	0.914416	0.000407328	10	10
ARVCF	ENST00000263207.3	0.434072	-0.000557708	8	8	ENST00000263207.3	0.461833	0.00929749	8	8	ENST00000263207.3	0.565734	0.00643564	8	8	ENST00000406259.1	0.364421	0.0128126	7	7	ENST00000263207.3	0.372209	0.0228221	8	8	ENST00000263207.3	0.440335	0.0206566	8	8	ENST00000406259.1	0.389344	-0.00205326	7	7	ENST00000263207.3	0.155584	0.0156797	8	8	ENST00000263207.3	0.238608	0.0122531	8	8
ARX	all	0.00262413	-0.0126446	10	10	all	0.250393	0.0024097	10	10	all	0.18245	-0.0090881	10	10	all	0.296823	0.0725473	10	10	all	0.705851	0.0841473	10	10	all	0.456207	0.0748292	10	10	all	0.997251	-0.0123473	10	10	all	0.533162	0.0406785	10	10	all	0.726256	0.0292691	10	10
AS3MT	all	0.413067	0.0111132	9	9	all	0.183983	-0.0357106	9	9	all	0.370839	-0.0105175	9	9	all	0.0371404	-0.109329	9	9	all	0.121211	-0.0568813	9	9	all	0.00706416	-0.0761688	9	9	all	0.0577348	-0.0701934	9	9	all	0.0114902	-0.124531	9	9	all	0.00226011	-0.0674715	9	9
ASAH1	all	0.642378	0.0048831	10	10	all	0.657878	-0.00758271	10	10	all	0.910641	-0.00509269	10	10	all	0.145493	-0.0215774	10	10	all	0.541533	0.0283004	10	10	all	0.32754	-0.0268126	10	10	all	0.266456	-0.0469029	10	10	all	0.390571	-0.0068816	10	10	all	0.30106	-0.0175036	10	10
ASAH2	all	0.184796	-0.0102733	9	9	all	0.647973	-0.0216418	9	9	all	0.663372	-0.0217259	9	9	all	0.512011	0.00112437	9	9	all	0.0556757	-0.113762	8	8	all	0.0631194	-0.0859002	8	8	all	0.29651	-0.0124233	9	9	all	0.0252692	-0.116767	9	9	all	0.020783	-0.0626795	9	9
ASAH2B	ENST00000374007.1	0.692001	0.00951387	10	10	ENST00000374007.1	0.154625	-0.0124575	10	10	ENST00000185907.9,ENST00000374006.1	0.61558	0.001083	10	10	ENST00000185907.9,ENST00000374006.1	0.395763	0.0664044	10	10	ENST00000374007.1	0.383614	0.0609991	10	10	ENST00000185907.9,ENST00000374006.1	0.416075	0.0479614	10	10	ENST00000185907.9,ENST00000374006.1	0.304934	0.0334965	10	10	ENST00000374007.1	0.768194	0.0196859	10	10	ENST00000185907.9,ENST00000374006.1	0.481568	0.0327814	10	10
ASAP1	ENST00000357668.1	0.0418521	-0.0144769	10	10	ENST00000357668.1	0.541334	-0.00725921	10	10	ENST00000357668.1	0.0636944	-0.0122899	10	10	ENST00000357668.1	0.796545	-0.0122115	10	10	ENST00000357668.1	0.186015	0.0120778	10	10	ENST00000357668.1	0.361732	0.0352816	10	10	ENST00000357668.1	0.515771	-0.0205556	10	10	ENST00000357668.1	0.328744	0.00776492	10	10	ENST00000518721.1	0.720832	-0.0377862	10	10
ASAP2	all	0.998017	-0.0213308	10	10	all	0.474524	-0.00188887	10	10	all	0.25297	-0.0204088	10	10	all	0.635391	0.0694747	10	10	all	0.726028	0.052573	10	10	all	0.703234	0.0254396	10	10	all	0.551937	0.0280811	10	10	all	0.457584	0.0546389	10	10	all	0.445715	0.0268321	10	10
ASAP3	all	0.0342497	0.0200805	10	10	all	0.110508	-0.00926461	10	10	all	0.644257	0.00328756	10	10	all	0.861517	0.0431976	10	10	all	0.460535	0.0610505	10	10	all	0.817071	0.0590679	10	10	all	0.552088	0.0543147	10	10	all	0.652213	0.0263515	10	10	all	0.68951	0.0506425	10	10
ASB1	all	0.320996	-0.0151793	10	10	all	0.420973	0.00885635	10	10	all	0.866423	-0.00617578	10	10	all	0.440988	0.0549232	10	10	all	0.373483	-0.0473016	10	10	all	0.884753	-0.0281424	10	10	all	0.65538	0.0478697	10	10	all	0.642515	-0.0436726	10	10	all	0.95118	-0.0340395	10	10
ASB10	all	0.294172	0.00360078	10	10	all	0.935793	0.00439257	10	10	all	0.57755	0.00933062	10	10	all	0.154959	0.0325118	10	10	all	0.435711	-0.0465758	10	10	all	0.546327	-0.00250223	10	10	all	0.133	0.0485784	10	10	all	0.541431	-0.0445413	10	10	all	0.444906	0.00860613	10	10
ASB11	all	0.818388	-0.00845949	10	10	all	0.0816863	-0.00824589	10	10	all	0.136648	-0.0133451	10	10	all	0.471114	-0.0247959	10	10	all	0.988139	-0.0540381	10	10	all	0.76848	-0.0362961	10	10	all	0.571512	-0.0418601	10	10	all	0.52334	-0.0425516	10	10	all	0.536002	-0.0422059	10	10
ASB12	ENST00000362002.2	0.242863	0.0160164	10	10	ENST00000362002.2	0.909236	-0.00930591	10	10	ENST00000396130.2	0.412191	0.00184839	9	9	ENST00000362002.2	0.427435	-0.0439277	10	10	ENST00000396130.2	0.0119361	0.133479	9	9	ENST00000362002.2	0.216572	-0.0602876	10	10	ENST00000362002.2	0.842703	-0.0530061	10	10	ENST00000396130.2	0.00674574	0.0953753	9	9	ENST00000396130.2	0.175286	0.083254	9	9
ASB13	all	0.0307077	-0.00351587	10	10	all	0.177451	-0.0241512	10	10	all	0.564792	-0.0113626	10	10	all	0.826836	0.0362835	10	10	all	0.402592	0.0804568	10	10	all	0.639376	0.0610688	10	10	all	0.306187	0.0237757	10	10	all	0.257668	0.0322283	10	10	all	0.923301	0.028002	10	10
ASB14	all	0.805789	0.00390037	9	9	all	0.0859602	0.0153184	9	9	all	0.315623	0.00764818	9	9	all	0.723686	0.0226494	9	9	all	0.697326	-0.0441623	9	9	all	0.629036	-0.0224259	9	9	all	0.672853	0.002598	9	9	all	0.786897	-0.022763	9	9	all	0.936446	-0.0100825	9	9
ASB15	ENST00000434204.1,ENST00000451215.1	0.206392	-0.0296183	9	9	ENST00000434204.1,ENST00000451215.1	0.139008	0.0162936	9	9	ENST00000275699.3	0.210631	-0.000553403	10	10	ENST00000540573.1	0.129911	-0.0434956	3	3	ENST00000434204.1,ENST00000451215.1	0.293004	-0.0374557	9	9	ENST00000540573.1	0.154829	-0.0340891	3	3	ENST00000540573.1	0.21602	-0.0291601	3	3	ENST00000540573.1	0.251956	-0.0296408	3	3	ENST00000540573.1	0.130474	-0.0294005	3	3
ASB16	all	0.0795137	-0.009867	10	10	all	0.398955	-0.0105264	10	10	all	0.0936297	-0.0110901	10	10	all	0.754029	0.0815294	10	10	all	0.944659	0.0273032	10	10	all	0.749953	0.0476302	10	10	all	0.870636	0.0532162	10	10	all	0.841044	-0.0284056	10	10	all	0.947398	0.0336035	10	10
ASB17	all	0.0117474	-0.0219188	10	10	all	0.166927	-0.00269343	10	10	all	0.0129158	-0.0162978	10	10	all	0.732017	0.0240143	10	10	all	0.224129	-0.0855172	10	10	all	0.539273	-0.0431988	10	10	all	0.358519	-0.052835	10	10	all	0.125615	-0.0823113	10	10	all	0.0960785	-0.0542761	10	10
ASB18	all	0.910903	-0.0138979	10	10	all	0.393357	-0.0284441	10	10	all	0.731581	-0.0128596	10	10	all	0.459505	-0.0335345	10	10	all	0.599761	-0.0258654	10	10	all	0.594283	-0.0762972	10	10	all	0.422261	-0.050764	10	10	all	0.446818	-0.0471	10	10	all	0.365384	-0.0738316	10	10
ASB2	all	0.42744	0.00377619	10	10	all	0.496254	-0.0125015	10	10	all	0.30745	-0.00389799	10	10	all	0.732485	-0.0249849	10	10	all	0.43355	-0.0708845	10	10	all	0.426269	-0.0422325	10	10	all	0.469975	-0.0216364	10	10	all	0.242192	-0.054652	10	10	all	0.263783	-0.0419021	10	10
ASB3	all	0.0289317	-0.0394079	9	9	all	0.336472	-0.0162849	9	9	all	0.0533067	-0.0301162	9	9	all	0.185981	0.0928096	9	9	all	0.525485	0.095291	9	9	all	0.238785	0.084479	9	9	all	0.42579	-0.0261988	9	9	all	0.66652	0.0456461	9	9	all	0.57527	0.0258614	9	9
ASB4	all	0.0864402	-0.012891	10	10	all	0.165475	0.00795271	10	10	all	0.907056	-0.000123914	10	10	all	0.0762971	0.0625509	10	10	all	0.100155	-0.0791315	10	10	all	0.947248	0.00256651	10	10	all	0.249442	-0.0058946	10	10	all	0.263988	-0.0184275	10	10	all	0.986333	-0.00926082	10	10
ASB5	all	0.676525	-0.0034861	10	10	all	0.866265	-0.00318184	10	10	all	0.963247	0.0041573	10	10	all	0.840999	0.0223465	10	10	all	0.775592	-0.025821	10	10	all	0.727401	0.0114534	10	10	all	0.846063	0.029628	10	10	all	0.699174	-0.0211307	10	10	all	0.657892	0.00958241	10	10
ASB6	all	0.577981	0.0065542	10	10	all	0.949955	0.0043574	10	10	all	0.608599	0.00294707	10	10	all	0.539551	-0.0252343	10	10	all	0.616926	-0.0374442	10	10	all	0.549494	-0.0312916	10	10	all	0.78507	-0.0240634	10	10	all	0.619156	-0.0286747	10	10	all	0.704311	-0.026369	10	10
ASB7	all	0.00103636	-0.0181025	9	9	all	0.089039	-0.0256506	9	9	all	0.00176063	-0.0215294	9	9	all	0.0599609	0.0822543	9	9	all	0.173798	0.101595	9	9	all	0.0706342	0.0848067	9	9	all	0.563622	0.0201085	9	9	all	0.666563	0.0279573	9	9	all	0.478365	0.0166027	9	9
ASB8	all	0.351701	0.0159785	10	10	all	0.127199	-0.0110208	10	10	all	0.607017	-0.00256635	10	10	all	0.406639	0.0317238	10	10	all	0.292033	0.0133161	10	10	all	0.288983	0.0256218	10	10	all	0.235536	0.0680615	10	10	all	0.615776	-0.00645981	10	10	all	0.367243	0.0197026	10	10
ASB9	all	0.0995039	-0.0117556	10	10	all	0.713427	-0.00220798	10	10	all	0.1919	-0.00932964	10	10	all	0.87081	0.0472724	10	10	all	0.540074	0.0520244	10	10	all	0.557374	0.0375803	10	10	all	0.773803	0.0193155	10	10	all	0.738905	0.0508357	10	10	all	0.838685	0.0280301	10	10
ASCC1	ENST00000394919.1	0.0987057	-0.00668456	10	10	ENST00000317126.4	0.118764	0.00606405	10	10	ENST00000394919.1	0.201665	-0.00758956	10	10	ENST00000317168.6	0.689059	0.0264835	5	5	ENST00000394919.1	0.18254	-0.0313161	10	10	ENST00000394919.1	0.342175	-0.0540449	10	10	ENST00000394919.1	0.288798	-0.0181734	10	10	ENST00000394919.1	0.12602	-0.0647237	10	10	ENST00000394919.1	0.152261	-0.0527188	10	10
ASCC2	all	0.00607463	0.0172793	10	10	all	0.899749	0.0110298	10	10	all	0.0734039	0.0165965	10	10	all	0.744771	-0.0500617	10	10	all	0.02296	0.121682	10	10	all	0.0655794	0.0151868	10	10	all	0.211467	0.0132263	10	10	all	0.00976811	0.0929952	10	10	all	0.0177099	0.0259967	10	10
ASCC3	all	4.53084e-06	-0.263355	10	10	all	2.9692e-07	-0.25804	10	10	all	3.78144e-07	-0.260697	10	10	all	1.87675e-05	0.481107	10	10	all	2.63528e-06	0.494742	10	10	all	3.85839e-06	0.487925	10	10	all	0.253857	-0.0301498	10	10	all	0.197594	-0.0179246	10	10	all	0.16337	-0.020338	10	10
ASCL1	all	0.48193	0.0113648	10	10	all	0.503254	0.00975115	10	10	all	0.329776	0.00662348	10	10	all	0.0828516	0.0912489	10	10	all	0.12573	0.0467612	10	10	all	0.0332144	0.0311843	10	10	all	0.03498	0.0861719	10	10	all	0.0799291	0.0471184	10	10	all	0.0172599	0.0363516	10	10
ASCL2	all	0.869391	0.00702689	10	10	all	0.182403	-0.00231136	10	10	all	0.569541	0.00271928	10	10	all	0.152141	-0.103521	10	10	all	0.639508	0.0661261	10	10	all	0.618962	-0.0129316	10	10	all	0.103046	-0.0609181	10	10	all	0.838528	0.0409492	10	10	all	0.431613	-0.0047956	10	10
ASCL3	ENST00000325884.1	0.308972	0.00674222	10	10	ENST00000531618.1	0.541933	-0.0100852	10	10	ENST00000325884.1	0.481593	0.000615687	10	10	ENST00000325884.1	0.470905	-0.0404106	10	10	ENST00000531618.1	0.372119	0.0287835	10	10	ENST00000531618.1	0.469173	0.0346536	10	10	ENST00000531618.1	0.570859	0.0189677	10	10	ENST00000531618.1	0.525032	0.0139494	10	10	ENST00000531618.1	0.486087	0.0151628	10	10
ASCL4	all	0.231215	0.000930037	10	10	all	0.827778	-0.000874797	10	10	all	0.382529	0.00657584	10	10	all	0.481332	-0.0882411	10	10	all	0.244167	-0.136846	10	10	all	0.269131	-0.0893303	10	10	all	0.105991	-0.0516569	10	10	all	0.253396	-0.10169	10	10	all	0.104152	-0.0872968	10	10
ASCL5	all	0.229415	-0.00766495	10	10	all	0.18335	0.0180262	10	10	all	0.517208	0.00408297	10	10	all	0.898479	0.0389835	10	10	all	0.400023	0.0107661	10	10	all	0.653277	0.0336509	10	10	all	0.591411	-0.00698455	10	10	all	0.939824	0.056387	10	10	all	0.692594	0.0442686	10	10
ASF1A	all	0.0164836	-0.0313816	10	10	all	1.80424e-05	-0.0413277	10	10	all	0.000245345	-0.0343032	10	10	all	0.00870038	-0.188593	10	10	all	0.00777976	-0.177296	10	10	all	0.00650769	-0.182944	10	10	all	0.0012889	-0.190733	10	10	all	0.000494788	-0.190513	10	10	all	0.000519449	-0.190623	10	10
ASF1B	all	0.401757	0.0171993	10	10	all	0.785613	0.00766082	10	10	all	0.530462	0.0141456	10	10	all	0.101493	0.124004	10	10	all	0.365014	0.0961378	10	10	all	0.0982988	0.0506582	10	10	all	0.268259	0.0893348	10	10	all	0.453457	0.057618	10	10	all	0.257601	0.0734764	10	10
ASGR1	all	0.192544	0.00519998	10	10	all	0.697313	-0.00462694	10	10	all	0.5376	0.00266479	10	10	all	0.468821	0.047966	10	10	all	0.918372	0.0618906	10	10	all	0.838415	0.0607004	10	10	all	0.116891	0.0357723	10	10	all	0.969598	0.0345614	10	10	all	0.465105	0.0405736	10	10
ASGR2	ENST00000446679.2	0.400585	-0.018009	10	10	ENST00000446679.2	0.334656	0.0103873	10	10	ENST00000254850.7	0.850705	0.0011282	10	10	ENST00000254850.7	0.194429	0.0352444	10	10	ENST00000446679.2	0.6527	0.0256521	10	10	ENST00000254850.7	0.333616	0.0219214	10	10	ENST00000254850.7	0.325339	-0.0211689	10	10	ENST00000446679.2	0.534053	0.0346261	10	10	ENST00000254850.7	0.278003	-0.00444414	10	10
ASH1L	ENST00000392403.3	0.111558	0.0212098	1	1	ENST00000392403.3	0.25469	-0.0105837	1	1	ENST00000368346.3	0.361159	0.00564619	1	1	ENST00000392403.3	0.0853225	-0.213232	1	1	ENST00000392403.3	0.0938989	-0.150064	1	1	ENST00000392403.3	0.0853251	-0.181648	1	1	ENST00000392403.3	0.0898274	-0.14043	1	1	ENST00000392403.3	0.0913222	-0.139083	1	1	ENST00000392403.3	0.0880863	-0.139757	1	1
ASH2L	all	0.561264	-0.00614638	10	10	all	0.296207	-0.0100991	10	10	all	0.244986	-0.00463946	10	10	all	0.686461	-0.0201632	10	10	all	0.149953	-0.0895058	10	10	all	0.208394	-0.0530522	10	10	all	0.49063	0.0227747	10	10	all	0.0855068	-0.0867104	10	10	all	0.137136	-0.0588407	10	10
ASIC1	all	0.684973	-0.0162758	10	10	all	0.132858	-0.0259137	10	10	all	0.421764	-0.0257905	10	10	all	0.250635	0.095117	10	10	all	0.0130997	0.111929	10	10	all	0.0298097	0.0927088	10	10	all	0.510094	0.0434389	10	10	all	0.0653756	0.0645363	10	10	all	0.146989	0.0623809	10	10
ASIC3	all	0.168975	0.00827917	10	10	all	0.416163	0.0059328	10	10	all	0.198884	0.0131417	10	10	all	0.117115	0.0404257	10	10	all	0.146213	0.0605842	10	10	all	0.113246	0.0531955	10	10	all	0.0291872	0.0379729	10	10	all	0.0542924	0.0890797	10	10	all	0.0212028	0.0410085	10	10
ASIP	ENST00000374954.3	0.0260996	-0.00558889	10	10	ENST00000374954.3	0.104475	-0.0123287	10	10	ENST00000374954.3	0.0126515	-0.0132045	10	10	ENST00000374954.3	0.48847	-0.0560868	10	10	ENST00000374954.3	0.217416	0.0404958	10	10	ENST00000374954.3	0.287442	0.0103509	10	10	ENST00000568305.1	0.14558	0.0881577	10	10	ENST00000374954.3	0.450944	-0.0176884	10	10	ENST00000568305.1	0.393893	0.0773439	10	10
ASL	all	0.790591	0.00374943	10	10	all	0.916316	0.0180986	10	10	all	0.742668	0.00359032	10	10	all	0.359238	-0.0591267	10	10	all	0.238379	0.10054	10	10	all	0.865841	0.0210443	10	10	all	0.411949	-0.0857579	10	10	all	0.112919	0.069232	10	10	all	0.708176	-0.0169443	10	10
ASMT	all	0.0740727	-0.0228208	10	10	all	0.139404	-0.0200111	10	10	all	0.0320313	-0.0224965	10	10	all	0.61836	-0.00840792	10	10	all	0.702075	0.129332	10	10	all	0.427785	0.0349797	10	10	all	0.589383	0.00584592	10	10	all	0.914253	0.0253526	10	10	all	0.957034	-0.0197607	10	10
ASMTL	all	0.197056	-0.0131214	10	10	all	0.401296	-0.0319269	10	10	all	0.273668	-0.0260198	10	10	all	0.408207	0.0178288	10	10	all	0.592159	0.0232256	10	10	all	0.356159	0.00319842	10	10	all	0.712065	-0.00659517	10	10	all	0.896405	-0.0127554	10	10	all	0.561017	-0.0561696	10	10
ASNA1	ENST00000357332.3	2.23914e-05	-0.145272	10	10	ENST00000357332.3	0.000160446	-0.153013	10	10	ENST00000357332.3	1.2569e-05	-0.149143	10	10	ENST00000357332.3	0.000208691	0.432095	10	10	ENST00000357332.3	6.81537e-05	0.453758	10	10	ENST00000357332.3	6.02279e-05	0.442927	10	10	ENST00000591090.1	0.0106809	0.0918736	10	10	ENST00000357332.3	0.011439	0.0945467	10	10	ENST00000357332.3	0.0163745	0.0928803	10	10
ASNS	ENST00000175506.4,ENST00000394308.3	0.126283	-0.0278641	10	10	ENST00000175506.4,ENST00000394308.3	0.0865633	-0.0316686	10	10	ENST00000175506.4,ENST00000394308.3	0.0430006	-0.0325651	10	10	ENST00000394309.3	0.266743	-0.0899762	10	10	ENST00000175506.4,ENST00000394308.3	0.469411	-0.0581699	10	10	ENST00000175506.4,ENST00000394308.3	0.47938	-0.0257714	10	10	ENST00000394309.3	0.0632793	-0.0786785	10	10	ENST00000175506.4,ENST00000394308.3	0.25483	-0.0918336	10	10	ENST00000394309.3	0.218192	-0.0242617	10	10
ASNSD1	all	0.857135	-0.0198582	10	10	all	0.698316	-0.00951082	10	10	all	0.361811	-0.00762455	10	10	all	0.806771	0.00699827	10	10	all	0.422187	0.125217	10	10	all	0.725957	0.118462	10	10	all	0.889305	0.0259856	10	10	all	0.317464	0.0391452	10	10	all	0.579058	0.0205609	10	10
ASPA	ENST00000456349.2	0.123534	-0.023356	10	10	ENST00000263080.2	0.0509535	0.0177228	10	10	ENST00000263080.2	0.0677926	0.000820072	10	10	ENST00000263080.2	0.423692	0.0651613	10	10	ENST00000263080.2	0.0581114	0.0513533	10	10	ENST00000263080.2	0.11852	0.0717245	10	10	ENST00000456349.2	0.0792042	-0.062416	10	10	ENST00000263080.2	0.00809247	0.0679841	10	10	ENST00000263080.2	0.0460672	0.0696175	10	10
ASPH	ENST00000541428.1	0.142864	-0.0187602	10	10	ENST00000379454.4	0.0303302	-0.0311321	10	10	ENST00000541428.1	0.0712855	-0.0098866	10	10	ENST00000541428.1	0.384571	0.0457936	10	10	ENST00000379454.4	0.0928482	-0.0482074	10	10	ENST00000379454.4	0.26045	-0.0519522	10	10	ENST00000379454.4	0.852437	-0.038171	10	10	ENST00000379454.4	0.0356062	-0.132631	10	10	ENST00000379454.4	0.26938	-0.0868737	10	10
ASPHD1	all	0.33689	-0.0114916	10	10	all	0.0386913	0.020967	10	10	all	0.440291	0.00544934	10	10	all	0.926991	-0.0259238	10	10	all	0.128236	-0.0519905	10	10	all	0.245096	-0.0273359	10	10	all	0.523831	-0.0195134	10	10	all	0.427367	0.0153991	10	10	all	0.200277	-3.95795e-05	10	10
ASPHD2	all	0.160885	0.0163789	8	8	all	0.315999	0.0066594	8	8	all	0.0751072	0.0106614	8	8	all	0.751787	-0.0228486	8	8	all	0.67818	0.0325772	8	8	all	0.949086	0.0266961	8	8	all	0.721152	0.0194463	8	8	all	0.677877	0.0497396	8	8	all	0.698625	0.034593	8	8
ASPM	all	0.379163	-0.00714235	10	10	all	0.387528	-0.00474355	10	10	all	0.342099	-0.015266	10	10	all	0.499033	0.0416918	10	10	all	0.658907	-0.0102975	10	10	all	0.87734	0.0441638	10	10	all	0.625718	-0.0223688	10	10	all	0.319738	0.0459445	10	10	all	0.540556	0.0440946	10	10
ASPRV1	all	0.128795	-0.0220279	10	10	all	0.752889	-0.00100827	10	10	all	0.419676	-0.0204207	10	10	all	0.424872	0.0238998	10	10	all	0.990484	0.0187856	10	10	all	0.907947	0.0328994	10	10	all	0.825419	-0.00934933	10	10	all	0.89636	-0.0376522	10	10	all	0.926894	-0.0389384	10	10
ASPSCR1	all	0.621084	-0.0107455	10	10	all	0.542457	-0.0271883	10	10	all	0.276953	-0.0102308	10	10	all	0.869609	-0.0346944	10	10	all	0.11269	0.148092	10	10	all	0.432283	0.0922196	10	10	all	0.548656	-0.0611687	10	10	all	0.224181	0.0950428	10	10	all	0.664366	0.0241783	10	10
ASRGL1	all	0.141605	-0.0197316	10	10	all	0.49697	0.00617543	10	10	all	0.391778	-0.00380069	10	10	all	0.124922	0.0481062	10	10	all	0.0137016	0.0982429	10	10	all	0.0285623	0.088201	10	10	all	0.340111	0.0299581	10	10	all	0.00883205	0.0921135	10	10	all	0.044751	0.0667402	10	10
ASS1	all	0.318825	0.000303534	10	10	all	0.203359	0.0183019	10	10	all	0.722329	0.00324717	10	10	all	0.172441	0.120911	10	10	all	0.63382	-0.014392	10	10	all	0.845587	0.0607677	10	10	all	0.288387	0.0980202	10	10	all	0.774153	0.0530423	10	10	all	0.748685	0.0557383	10	10
ASTE1	all	0.988327	-0.0059061	10	10	all	0.0232568	0.0279071	10	10	all	0.0966555	0.0153397	10	10	all	0.463047	0.0571652	10	10	all	0.158417	-0.0156986	10	10	all	0.791323	0.0335613	10	10	all	0.31814	0.0363641	10	10	all	0.999189	0.0210396	10	10	all	0.59721	0.0297192	10	10
ASTL	all	0.968324	-0.00126192	10	10	all	0.181885	-0.0113923	10	10	all	0.348572	0.00337615	10	10	all	0.500614	-0.0203682	10	10	all	0.812729	-0.000702196	10	10	all	0.486796	-0.011313	10	10	all	0.667254	-0.0266653	10	10	all	0.536879	-0.0583137	10	10	all	0.413885	-0.0405049	10	10
ASTN1	all	0.238313	0.00500313	10	10	all	0.772872	-0.00174097	10	10	all	0.432427	0.00277424	10	10	all	0.327832	-0.0394933	10	10	all	0.500829	0.0303947	10	10	all	0.325531	-0.0164091	10	10	all	0.554734	-0.0228598	10	10	all	0.617803	0.0111552	10	10	all	0.471973	-0.0111578	10	10
ASTN2	all	0.0614774	0.0194012	10	10	all	0.558676	-0.00775036	10	10	all	0.503045	0.00535901	10	10	all	0.828774	-0.0428043	10	10	all	0.311344	0.0827827	10	10	all	0.562709	0.04029	10	10	all	0.626879	0.0176008	10	10	all	0.335018	0.0583813	10	10	all	0.442955	0.0469961	10	10
ASUN	all	0.459967	-0.0253243	10	10	all	0.793094	-0.0356961	10	10	all	0.836283	-0.0269942	10	10	all	0.582195	-0.0162941	10	10	all	0.947989	-0.0451153	10	10	all	0.630259	-0.0201448	10	10	all	0.423928	-0.0321163	10	10	all	0.493264	-0.10252	10	10	all	0.391889	-0.0833037	10	10
ASXL1	ENST00000375687.4	0.12341	0.0191033	10	10	ENST00000375687.4	0.099934	-0.0133016	10	10	ENST00000375687.4	0.838757	0.0025389	10	10	ENST00000375687.4	0.000647704	0.283822	10	10	ENST00000375687.4	3.15079e-05	0.32061	10	10	ENST00000375687.4	0.000100617	0.297908	10	10	ENST00000375687.4	0.000120836	0.25398	10	10	ENST00000375687.4	0.000113281	0.249838	10	10	ENST00000375687.4	6.68795e-05	0.244661	10	10
ASXL2	all	0.489963	-0.0129807	9	9	all	0.000901068	0.0376347	10	10	all	0.156552	0.00830602	9	9	all	0.250286	-0.0823363	8	8	all	0.0310738	-0.113527	10	10	all	0.134856	-0.0562147	8	8	all	0.481023	-0.0681791	9	9	all	0.683919	-0.0113413	9	9	all	0.46239	-0.0401442	9	9
ASZ1	all	0.44313	0.0132977	10	10	all	0.250207	0.00952933	10	10	all	0.773123	0.0103952	10	10	all	0.350477	0.0248184	10	10	all	0.86405	-0.00658487	10	10	all	0.612591	0.0340365	10	10	all	0.328601	-0.00892414	10	10	all	0.560208	0.0461566	10	10	all	0.42831	0.036002	10	10
ATAD1	ENST00000308448.7	0.461635	0.0139263	9	9	ENST00000308448.7	0.710417	-0.00020327	8	8	ENST00000328142.3	0.536285	-0.00224228	6	6	ENST00000308448.7	0.0138323	-0.0668915	9	9	ENST00000308448.7	0.00455928	-0.10214	8	8	ENST00000308448.7	0.0129877	-0.0995713	8	8	ENST00000308448.7	0.057194	-0.0382566	8	8	ENST00000308448.7	0.00471948	-0.0964277	8	8	ENST00000308448.7	0.0178597	-0.0863742	8	8
ATAD2	all	0.24639	-0.00257135	10	10	all	0.0455244	0.00934789	10	10	all	0.062237	0.00085404	10	10	all	0.846705	0.0328915	10	10	all	0.102965	0.0832858	10	10	all	0.291358	0.0663321	10	10	all	0.618534	0.0208498	10	10	all	0.0219308	0.0710764	10	10	all	0.118939	0.0270257	10	10
ATAD2B	all	0.061713	-0.0164965	10	10	all	0.0979124	-0.0212301	10	10	all	0.0354188	-0.0188633	10	10	all	0.753342	0.0651882	10	10	all	0.389348	0.0709888	10	10	all	0.638001	0.0680885	10	10	all	0.934991	-0.0350355	10	10	all	0.69004	-0.0364905	10	10	all	0.879529	0.00657719	10	10
ATAD3A	all	0.0280629	-0.053939	8	8	all	0.0388998	-0.00701396	8	8	all	0.0251209	-0.0396992	8	8	all	0.852631	-0.0279337	8	8	all	0.456151	0.0466493	8	8	all	0.730026	0.0328555	8	8	all	0.141272	-0.133035	8	8	all	0.571479	0.0194999	8	8	all	0.214586	-0.0298241	8	8
ATAD3B	all	0.00397142	-0.0338838	10	10	all	0.0379006	-4.09902e-05	10	10	all	0.00127251	-0.022324	10	10	all	0.477048	0.105219	10	10	all	0.664891	0.0172033	10	10	all	0.605934	0.0283329	10	10	all	0.625878	-0.0151053	10	10	all	0.34858	-0.0680282	10	10	all	0.355703	-0.0192971	10	10
ATAD3C	all	0.0639408	-0.0342332	10	10	all	0.0716794	-0.0137818	10	10	all	0.00408883	-0.0174747	10	10	all	0.0129674	0.118028	10	10	all	0.755489	0.0215238	10	10	all	0.113401	0.0920952	10	10	all	0.0948246	0.03689	10	10	all	0.669274	0.0149524	10	10	all	0.398046	-0.0110426	10	10
ATAD5	all	0.0189501	-0.0477675	10	10	all	0.00732497	-0.0484151	10	10	all	0.0207436	-0.0458305	10	10	all	0.137386	0.11981	10	10	all	0.0414273	0.0359402	10	10	all	0.0620305	0.0509134	10	10	all	0.776399	-0.0165644	10	10	all	0.581306	-0.000643919	10	10	all	0.98471	-0.00274148	10	10
ATAT1	all	0.22298	-0.0187721	10	10	all	0.36325	-0.00871673	10	10	all	0.067963	-0.0103069	10	10	all	0.229758	0.046336	10	10	all	0.83614	-0.000389713	10	10	all	0.38705	0.0160904	10	10	all	0.486906	0.0253802	10	10	all	0.802179	-0.0362749	10	10	all	0.780945	-0.0179466	10	10
ATCAY	all	0.000998938	0.0248488	9	9	all	0.204448	0.000738774	9	9	all	0.00444902	0.016585	9	9	all	0.184479	-0.0837842	9	9	all	0.176148	-0.0486822	9	9	all	0.0823972	-0.0523199	9	9	all	0.910584	-0.0137912	9	9	all	0.3615	-0.0325643	9	9	all	0.693025	-0.0160593	9	9
ATE1	all	0.19555	0.0135364	10	10	all	0.056599	-0.0201308	10	10	all	0.370568	-0.00160951	10	10	all	0.161644	-0.0789112	10	10	all	0.133494	-0.0401115	10	10	all	0.143687	-0.0838468	10	10	all	0.369263	-0.0248312	10	10	all	0.0377179	-0.0908621	10	10	all	0.0934424	-0.0737774	10	10
ATF1	all	0.191044	0.0237586	10	10	all	0.233243	0.0071086	10	10	all	0.334965	0.0211699	10	10	all	0.738791	0.0342221	10	10	all	0.0214745	0.0840371	10	10	all	0.257679	0.0701569	10	10	all	0.764349	0.0468153	10	10	all	0.0228674	0.0951815	10	10	all	0.10408	0.0733071	10	10
ATF2	all	0.129365	0.0113586	10	10	all	0.268185	0.00646505	10	10	all	0.123544	0.012502	10	10	all	0.13211	-0.106171	10	10	all	0.149187	-0.0945409	10	10	all	0.139033	-0.100356	10	10	all	0.272136	-0.0700652	10	10	all	0.33971	-0.0292288	10	10	all	0.327251	-0.0699203	10	10
ATF3	ENST00000341491.4	0.0877228	-0.033811	10	10	ENST00000341491.4	0.368401	0.00379781	10	10	ENST00000341491.4	0.0263186	-0.0165243	10	10	ENST00000341491.4	0.673619	0.0208169	10	10	ENST00000366987.2	0.409811	-0.0895782	10	10	ENST00000366987.2	0.594126	-0.0399195	10	10	ENST00000366987.2	0.434347	-0.0282029	10	10	ENST00000366987.2	0.336578	-0.0618641	10	10	ENST00000366987.2	0.338199	-0.0264245	10	10
ATF4	ENST00000337304.2,ENST00000396680.1	0.0192684	-0.010619	10	10	ENST00000404241.2	0.0108507	0.0245414	10	10	ENST00000337304.2,ENST00000396680.1	0.0445607	-0.0257769	10	10	ENST00000337304.2,ENST00000396680.1	0.531177	-0.0551817	10	10	ENST00000404241.2	0.19036	-0.120301	10	10	ENST00000404241.2	0.326255	-0.0319668	10	10	ENST00000337304.2,ENST00000396680.1	0.162898	-0.0748733	10	10	ENST00000337304.2,ENST00000396680.1	0.216318	-0.101407	10	10	ENST00000337304.2,ENST00000396680.1	0.143894	-0.0964848	10	10
ATF5	ENST00000595125.1	1.70387e-05	-0.0626386	9	9	ENST00000595125.1	0.000130798	-0.0847276	8	8	ENST00000595125.1	1.06938e-05	-0.0645187	8	8	ENST00000595125.1	0.186592	-0.0838692	7	7	ENST00000423777.2	0.0082447	-0.128878	5	5	ENST00000423777.2	0.0205089	-0.0961717	5	5	ENST00000595125.1	0.00150201	-0.19741	9	9	ENST00000595125.1	0.00440393	-0.185017	8	8	ENST00000595125.1	0.00447459	-0.182552	8	8
ATF6	all	0.945373	-0.00427814	10	10	all	0.0775363	0.0217187	10	10	all	0.131479	0.00431405	10	10	all	0.22838	-0.0560648	10	10	all	0.669332	-0.0686783	10	10	all	0.374259	-0.0656036	10	10	all	0.187276	-0.0411326	10	10	all	0.764573	-0.0124236	10	10	all	0.570733	-0.0382575	10	10
ATF6B	all	0.0953669	0.0147848	9	9	all	0.865042	0.000197278	9	9	all	0.163355	0.00301329	9	9	all	0.0663176	-0.0751441	9	9	all	0.0476569	-0.0834188	9	9	all	0.019997	-0.0680187	9	9	all	0.232827	-0.0256594	9	9	all	0.0701447	-0.0696385	9	9	all	0.0501144	-0.023606	9	9
ATF7	ENST00000456903.4	0.153427	-0.0226133	10	10	ENST00000456903.4	0.00835982	-0.0323698	10	10	ENST00000456903.4	0.00425416	-0.0213698	10	10	ENST00000456903.4	0.130118	0.0491695	10	10	ENST00000548446.2,ENST00000420353.2	0.148375	-0.0150187	10	10	ENST00000456903.4	0.147035	0.0376175	10	10	ENST00000456903.4	0.469662	0.0392959	10	10	ENST00000548446.2,ENST00000420353.2	0.0317783	-0.0190491	10	10	ENST00000548446.2,ENST00000420353.2	0.0976015	-0.0305828	10	10
ATF7IP	ENST00000540793.1	0.736512	-0.00462845	7	7	ENST00000540793.1	0.225256	0.0109867	7	7	ENST00000540793.1	0.447645	0.00478708	7	7	ENST00000540793.1	0.477413	0.0436135	7	7	ENST00000261168.4	0.178895	-0.0535423	10	10	ENST00000540793.1	0.295037	0.049182	7	7	ENST00000540793.1	0.492765	0.0278697	7	7	ENST00000540793.1	0.0574986	0.0815482	7	7	ENST00000540793.1	0.133819	0.0374014	7	7
ATF7IP2	ENST00000396560.2	0.0206629	-0.0347191	10	10	ENST00000356427.2	0.0162804	0.0244696	10	10	ENST00000396560.2	0.00256544	-0.0301016	10	10	ENST00000396560.2	0.709551	0.0276253	10	10	ENST00000396560.2	0.692374	-0.0650529	10	10	ENST00000396560.2	0.683764	0.0169072	10	10	ENST00000396560.2	0.63093	-0.0606478	10	10	ENST00000356427.2	0.378788	0.0126152	9	9	ENST00000356427.2	0.661027	0.0408098	9	9
ATG10	all	0.279227	0.0060844	10	10	all	0.244779	-0.0062988	10	10	all	0.745319	0.00254052	10	10	all	0.609781	0.037188	10	10	all	0.976235	0.0195113	10	10	all	0.817686	0.0360709	10	10	all	0.895781	-0.00167257	10	10	all	0.567149	0.00206435	10	10	all	0.901602	0.00648149	10	10
ATG12	all	0.932701	0.00755762	10	10	all	0.409523	0.0165395	10	10	all	0.792317	0.0113181	10	10	all	0.403927	-0.0449603	10	10	all	0.743189	-0.106933	10	10	all	0.519413	-0.0722717	10	10	all	0.366618	-0.0566544	10	10	all	0.830286	-0.0568957	10	10	all	0.569044	-0.0690498	10	10
ATG13	all	0.246266	0.011022	1	1	ENST00000451945.1,ENST00000529655.1	0.0905067	-0.0397123	1	1	all	0.0978247	0.0178645	1	1	ENST00000529655.1,ENST00000524625.1	0.141581	0.0864766	7	7	ENST00000529655.1,ENST00000524625.1	0.0656348	0.107404	7	7	ENST00000529655.1,ENST00000524625.1	0.0477496	0.0855235	7	7	ENST00000529655.1,ENST00000524625.1	0.126256	0.0871299	7	7	ENST00000529655.1,ENST00000524625.1	0.110376	0.0907977	7	7	ENST00000529655.1,ENST00000524625.1	0.0682745	0.0829315	7	7
ATG14	all	0.916996	0.000963556	10	10	all	0.300775	0.00325383	10	10	all	0.368216	0.00413297	10	10	all	0.671145	-0.0356796	10	10	all	0.210005	-0.0601697	10	10	all	0.351165	-0.0248338	10	10	all	0.892699	0.00638059	10	10	all	0.382059	-0.0155159	10	10	all	0.503522	-0.0152418	10	10
ATG16L1	all	0.759104	0.000833879	9	9	all	0.87015	0.00435723	9	9	all	0.940944	-0.000127285	9	9	all	0.00473131	-0.101716	9	9	all	0.193466	0.0151759	9	9	all	0.452816	-0.0478511	9	9	all	0.00758765	-0.0902974	9	9	all	0.127681	0.00111577	9	9	all	0.408208	-0.0368135	9	9
ATG16L2	all	0.598297	-0.00718278	10	10	all	0.25023	0.00222628	10	10	all	0.316105	-0.00334965	10	10	all	0.63004	-0.0489795	10	10	all	0.710814	-0.0296424	10	10	all	0.521912	0.0247467	10	10	all	0.958644	-0.0518275	10	10	all	0.915462	0.0221257	10	10	all	0.922044	-0.0253519	10	10
ATG2A	all	0.416243	0.00882687	10	10	all	0.217427	0.00247451	10	10	all	0.17684	0.0090391	10	10	all	0.713426	0.0530104	10	10	all	0.565102	-0.0253839	10	10	all	0.860413	-0.00867773	10	10	all	0.632899	0.0980284	10	10	all	0.957987	-0.0381211	10	10	all	0.838508	0.00161677	10	10
ATG2B	all	0.172076	0.00379006	10	10	all	0.798849	0.00052983	10	10	all	0.241606	0.000426714	10	10	all	0.304106	0.133799	10	10	all	0.133041	0.162384	10	10	all	0.170881	0.148092	10	10	all	0.0937574	0.10867	10	10	all	0.10555	0.125504	10	10	all	0.0673287	0.116917	10	10
ATG3	all	0.886316	0.0116362	10	10	all	0.977601	0.00379953	10	10	all	0.722498	0.00410833	10	10	all	0.917789	0.118334	10	10	all	0.546636	0.173813	10	10	all	0.603406	0.149039	10	10	all	0.773673	0.0958833	10	10	all	0.386812	0.1521	10	10	all	0.465796	0.141295	10	10
ATG4A	all	0.189248	-0.00594104	10	10	all	0.329699	-0.00444675	10	10	all	0.110353	-0.00904094	10	10	all	0.443372	-0.0535793	10	10	all	0.847901	0.0191968	10	10	all	0.740359	-0.03427	10	10	all	0.209697	-0.0862531	10	10	all	0.991576	0.0038071	10	10	all	0.437329	-0.035781	10	10
ATG4B	all	0.288798	-0.0104719	10	10	all	0.996169	-0.0041642	10	10	all	0.433156	-0.00570341	10	10	all	0.587284	-0.0503928	10	10	all	0.39457	-0.0330887	10	10	all	0.439416	-0.0441369	10	10	all	0.307846	-0.0464919	10	10	all	0.308796	-0.0151929	10	10	all	0.296904	-0.0659537	10	10
ATG4C	all	0.526519	-0.0061439	10	10	all	0.470797	-0.00486458	10	10	all	0.258218	-0.00291453	10	10	all	0.220083	-0.0115468	10	10	all	0.112754	-0.00923692	10	10	all	0.101779	-0.00269266	10	10	all	0.16502	-0.0170591	10	10	all	0.0964904	-0.0140843	10	10	all	0.09751	-0.0155717	10	10
ATG4D	all	0.135748	0.00132129	10	10	all	0.510704	0.00385751	10	10	all	0.421699	0.00128838	10	10	all	0.0977047	-0.0121394	10	10	all	0.0755223	0.0915757	10	10	all	0.0607122	0.0172475	10	10	all	0.337857	0.00420353	10	10	all	0.0206007	0.0655606	10	10	all	0.0774266	0.0517278	10	10
ATG5	ENST00000369076.3	0.133936	0.0193091	10	10	ENST00000343245.3	0.482448	-0.00884223	10	10	ENST00000369076.3	0.123902	0.00516861	10	10	ENST00000369076.3	0.216847	-0.114081	10	10	ENST00000343245.3	0.104574	0.105977	10	10	ENST00000343245.3	0.25342	0.069895	10	10	ENST00000369076.3	0.447069	-0.0681065	10	10	ENST00000343245.3	0.107263	0.0545327	10	10	ENST00000343245.3	0.205207	0.0423209	10	10
ATG7	all	0.972468	-0.00194072	10	10	all	0.64449	-0.00853074	10	10	all	0.891661	-0.0106836	10	10	all	0.309107	-0.0297941	10	10	all	0.986515	0.0282179	10	10	all	0.684429	-0.0262143	10	10	all	0.376901	-0.0296766	10	10	all	0.864646	0.0102848	10	10	all	0.539584	-0.0196084	10	10
ATG9A	ENST00000396761.2,ENST00000361242.4	0.230753	-0.0120043	10	10	ENST00000396761.2,ENST00000361242.4	0.13187	0.00675825	10	10	ENST00000409618.1	0.647445	-0.00930117	9	9	ENST00000409618.1	0.430351	-0.0748269	9	9	ENST00000396761.2,ENST00000361242.4	0.0149184	-0.100117	10	10	ENST00000396761.2,ENST00000361242.4	0.0267095	-0.0602074	10	10	ENST00000409618.1,ENST00000361242.4	0.332208	0.038267	1	1	ENST00000396761.2,ENST00000361242.4	0.0505646	-0.0632466	10	10	ENST00000396761.2,ENST00000361242.4	0.0524833	-0.0604128	10	10
ATG9B	all	0.204149	-0.0185215	10	10	all	0.408818	-0.00127744	10	10	all	0.834782	-0.0184924	10	10	all	0.436843	0.0109008	10	10	all	0.793056	0.00472177	10	10	all	0.674065	0.0173734	10	10	all	0.246321	-0.0281791	10	10	all	0.477618	0.00497796	10	10	all	0.725577	-0.0245874	10	10
ATHL1	ENST00000409548.2	0.0017739	-0.0157728	10	10	ENST00000409479.1	0.130946	0.0110964	10	10	ENST00000409548.2	0.059972	-0.0184908	10	10	ENST00000409548.2	0.0270662	0.114234	10	10	ENST00000409479.1	0.0230247	0.102146	10	10	ENST00000409548.2	0.0227742	0.0859024	10	10	ENST00000409548.2	0.461134	0.041295	10	10	ENST00000409479.1	0.00332555	0.0923284	10	10	ENST00000409479.1	0.103455	0.0680459	10	10
ATIC	all	0.00161274	-0.0474032	10	10	all	0.000648155	-0.0489246	10	10	all	0.000922563	-0.045443	10	10	all	0.0325412	0.20246	10	10	all	0.0747447	0.235339	10	10	all	0.0416952	0.218767	10	10	all	0.0746966	0.107224	10	10	all	0.595862	0.110555	10	10	all	0.213453	0.0978828	10	10
ATL1	ENST00000441560.2	0.554167	-0.00230039	10	10	ENST00000441560.2	0.335392	-0.015504	10	10	ENST00000441560.2	0.370508	-0.0116722	10	10	ENST00000441560.2	0.181541	0.102371	10	10	ENST00000441560.2	0.0511594	0.0852716	10	10	ENST00000441560.2	0.0528915	0.0878039	10	10	ENST00000441560.2	0.13767	0.0715799	10	10	ENST00000441560.2	0.102617	0.0335296	10	10	ENST00000441560.2	0.0667554	0.0571984	10	10
ATL2	all	0.0689658	-0.0282062	10	10	all	0.431086	-0.0294983	10	10	all	0.113826	-0.0266599	10	10	all	0.201918	0.0873001	10	10	all	0.0445087	0.0762715	10	10	all	0.0484774	0.0909811	10	10	all	0.737395	0.0384565	10	10	all	0.209598	0.0275002	10	10	all	0.26762	0.0147251	10	10
ATL3	all	0.744393	-0.00676934	10	10	all	0.0589834	-0.0352383	10	10	all	0.167289	-0.0227619	10	10	all	0.988454	0.0360855	10	10	all	0.240071	0.0604593	10	10	all	0.502532	0.0448209	10	10	all	0.778001	0.0324854	10	10	all	0.829714	0.00690853	10	10	all	0.909574	0.023451	10	10
ATM	ENST00000452508.2	0.148542	-0.0177089	6	6	ENST00000278616.4	0.37369	-0.0179254	6	6	ENST00000278616.4	0.466287	-0.00693369	6	6	ENST00000452508.2	0.120832	-0.0945445	6	6	ENST00000278616.4	0.222029	-0.0426914	6	6	ENST00000452508.2	0.103576	-0.0732203	6	6	ENST00000452508.2	0.032053	-0.0943713	6	6	ENST00000278616.4	0.135487	-0.0449239	6	6	ENST00000452508.2	0.0588526	-0.0688242	6	6
ATMIN	ENST00000299575.4	0.00644832	-0.0248473	10	10	ENST00000299575.4	0.136942	-0.00531079	10	10	ENST00000299575.4	0.016731	-0.0178083	10	10	ENST00000299575.4	0.15659	-0.101267	10	10	ENST00000299575.4	0.00533052	-0.188499	10	10	ENST00000299575.4	0.0227404	-0.144883	10	10	ENST00000299575.4	0.0353969	-0.123877	10	10	ENST00000299575.4	0.00155386	-0.169387	10	10	ENST00000299575.4	0.00554048	-0.146632	10	10
ATN1	ENST00000356654.4	0.00524073	0.0171731	10	10	ENST00000356654.4	0.836151	-0.00752127	10	10	ENST00000356654.4	0.0434097	0.0101261	10	10	ENST00000396684.2	0.454921	0.0362351	10	10	ENST00000396684.2	0.175898	0.155256	10	10	ENST00000396684.2	0.302895	0.0608274	10	10	ENST00000396684.2	0.274585	0.0307231	10	10	ENST00000396684.2	0.134331	0.0371192	10	10	ENST00000396684.2	0.25822	0.0900427	10	10
ATOH1	all	0.0993995	0.0153888	10	10	all	0.95018	-0.00294744	10	10	all	0.355477	0.00557188	10	10	all	0.156491	-0.0305372	10	10	all	0.615256	-0.0317898	10	10	all	0.266102	-0.0230394	10	10	all	0.447441	0.024671	10	10	all	0.605763	-0.0291465	10	10	all	0.51309	-0.0206703	10	10
ATOH7	all	0.546249	-0.00725829	10	10	all	0.364892	-0.0192934	10	10	all	0.263927	-0.00734169	10	10	all	0.772908	-0.0265927	10	10	all	0.218831	0.0793944	10	10	all	0.75382	0.0408812	10	10	all	0.731098	-0.0798977	10	10	all	0.43457	-0.00359777	10	10	all	0.945418	0.0215096	10	10
ATOH8	all	0.229109	0.00223323	10	10	all	0.424503	0.00712712	10	10	all	0.330225	0.00709605	10	10	all	0.976415	-0.0955847	10	10	all	0.696633	-0.126604	10	10	all	0.91935	-0.0965737	10	10	all	0.470044	-0.0896714	10	10	all	0.917031	-0.0799769	10	10	all	0.561474	-0.0848242	10	10
ATOX1	ENST00000524142.1	0.0114861	0.0161052	10	10	ENST00000524142.1	0.257612	0.00455266	10	10	ENST00000524142.1	0.0160725	0.013515	10	10	ENST00000524142.1	0.0263496	-0.0829681	10	10	ENST00000524142.1	0.459814	0.00195631	10	10	ENST00000524142.1	0.0830626	-0.072894	10	10	ENST00000524142.1	0.212419	-0.0501498	10	10	ENST00000313115.6,ENST00000522710.1	0.665494	0.0213435	10	10	ENST00000524142.1	0.296433	-0.016335	10	10
ATP10B	all	0.803628	0.00358709	10	10	all	0.870178	0.00375642	10	10	all	0.660233	-0.00369089	10	10	all	0.37112	-0.0399974	10	10	all	0.797592	-0.0336627	10	10	all	0.37505	-0.0237443	10	10	all	0.401662	-0.0563425	10	10	all	0.77939	-0.0190961	10	10	all	0.393266	-0.0164467	10	10
ATP10D	all	0.0010478	0.0277323	9	9	all	0.41752	-0.0414571	9	9	all	0.415734	-0.0120744	9	9	all	0.755173	0.0231284	9	9	all	0.0258049	0.113636	9	9	all	0.237883	0.0447509	9	9	all	0.215516	0.0415995	9	9	all	0.387849	0.030593	9	9	all	0.224635	0.0399799	9	9
ATP11A	all	0.487367	0.00848151	10	10	all	0.290085	-0.0171391	10	10	all	0.17626	-0.0034882	10	10	all	0.783616	-0.0189492	10	10	all	0.169684	0.0915213	10	10	all	0.578937	0.0427587	10	10	all	0.553297	-0.00926818	10	10	all	0.458781	0.0455925	10	10	all	0.972355	0.0379606	10	10
ATP11B	all	0.117459	-0.0170615	10	10	all	0.371114	-0.00582158	10	10	all	0.0822983	-0.011552	10	10	all	0.827409	0.0302002	10	10	all	0.619436	0.0274086	10	10	all	0.774888	0.0111012	10	10	all	0.354806	-0.0158503	10	10	all	0.329388	0.0279617	10	10	all	0.366163	-0.02089	10	10
ATP11C	all	0.889663	-0.012286	10	10	all	0.994771	0.00657038	10	10	all	0.742668	-0.00500001	10	10	all	0.93418	0.00573963	10	10	all	0.584407	-0.0383656	10	10	all	0.833642	-0.0127602	10	10	all	0.831495	-0.0264021	10	10	all	0.715928	-0.0144942	10	10	all	0.942538	-0.0179174	10	10
ATP13A1	all	0.389348	-0.00775399	10	10	all	0.626323	-0.00559568	10	10	all	0.251098	-0.00843932	10	10	all	0.264292	-0.0326894	10	10	all	0.170775	-0.0240734	10	10	all	0.22859	-0.0778943	10	10	all	0.170731	-0.0786986	10	10	all	0.132956	-0.026555	10	10	all	0.190448	-0.0765529	10	10
ATP13A2	all	0.55625	-0.00357881	10	10	all	0.531023	0.00885066	10	10	all	0.931559	0.00437404	10	10	all	0.118736	0.0316058	10	10	all	0.550479	-0.115936	10	10	all	0.433412	-0.0189452	10	10	all	0.17726	0.025919	10	10	all	0.706463	-0.0535128	10	10	all	0.337743	-0.0176981	10	10
ATP13A3	ENST00000256031.4	0.231907	0.00677434	7	7	ENST00000439040.1	0.476357	0.0045678	9	9	ENST00000256031.4	0.108523	0.0137297	7	7	ENST00000256031.4	0.164122	-0.0928988	7	7	ENST00000439040.1	0.0483706	-0.165285	9	9	ENST00000439040.1	0.135926	-0.155587	9	9	ENST00000256031.4	0.403027	-0.0706078	7	7	ENST00000439040.1	0.035634	-0.116648	9	9	ENST00000439040.1	0.154289	-0.073613	9	9
ATP1A1	ENST00000295598.5	1.03981e-05	-0.0944162	10	10	ENST00000295598.5	9.96625e-07	-0.094075	10	10	ENST00000295598.5	4.17997e-06	-0.0932927	10	10	ENST00000295598.5	0.0240877	0.173941	10	10	ENST00000295598.5	0.00594816	0.10747	10	10	ENST00000295598.5	0.00243771	0.12775	10	10	ENST00000295598.5	0.0405952	-0.127619	10	10	ENST00000295598.5	0.0375207	-0.155993	10	10	ENST00000295598.5	0.0237423	-0.134601	10	10
ATP1A2	all	0.370488	0.000190835	9	9	all	0.402428	0.00543349	9	9	all	0.90318	-0.00268591	9	9	all	0.366305	-0.011846	9	9	all	0.949067	0.0227285	9	9	all	0.635744	-0.0130607	9	9	all	0.231756	-0.00857984	9	9	all	0.798044	0.0231692	9	9	all	0.626086	-0.00710117	9	9
ATP1A3	all	0.412336	-0.00998933	10	10	all	0.466741	-0.0045938	10	10	all	0.252548	-0.011139	10	10	all	0.668262	-0.0101484	10	10	all	0.833006	0.0209203	10	10	all	0.791235	0.00346066	10	10	all	0.392436	-0.072374	10	10	all	0.580378	-0.0165049	10	10	all	0.459253	-0.0301951	10	10
ATP1A4	all	0.686675	-0.00511835	10	10	all	0.674305	0.0038689	10	10	all	0.700843	0.000517257	10	10	all	0.535895	-0.0318386	10	10	all	0.109496	-0.0702034	10	10	all	0.22459	-0.0716423	10	10	all	0.572895	-0.0339722	10	10	all	0.0829701	-0.0591663	10	10	all	0.173752	-0.0628772	10	10
ATP1B1	ENST00000367815.4	0.447643	0.00985112	10	10	ENST00000367816.1	0.446415	-0.000492316	10	10	ENST00000367815.4	0.603701	0.00542854	10	10	ENST00000367815.4	0.771524	0.0379988	10	10	ENST00000367816.1	0.602121	0.0318576	10	10	ENST00000367816.1	0.529222	-0.0224765	10	10	ENST00000367816.1	0.890288	-0.0271209	10	10	ENST00000367815.4	0.573938	0.00960561	10	10	ENST00000367816.1	0.555999	-0.0160193	10	10
ATP1B2	all	0.399857	-0.00172259	10	10	all	0.804351	-0.00421812	10	10	all	0.696824	-0.00166434	10	10	all	0.311047	0.117653	10	10	all	0.935169	-0.0269694	10	10	all	0.416399	0.0334729	10	10	all	0.155586	0.0872716	10	10	all	0.90132	-0.0183087	10	10	all	0.338998	0.028322	10	10
ATP1B3	all	0.111838	-0.0142447	10	10	all	0.782922	-0.00426623	10	10	all	0.554821	-0.00808436	10	10	all	0.0236171	0.0835827	10	10	all	0.114964	0.0996643	10	10	all	0.0220283	0.0871427	10	10	all	0.0631348	0.0199068	10	10	all	0.100881	0.0735988	10	10	all	0.038392	0.0570325	10	10
ATP2A1	all	0.0355006	0.0197305	10	10	all	0.153873	0.015719	10	10	all	0.0154897	0.0145462	10	10	all	0.0233261	-0.0417584	10	10	all	0.485884	-0.0261728	10	10	all	0.0674751	-0.0281204	10	10	all	0.113361	-0.0247915	10	10	all	0.974776	-0.0221683	10	10	all	0.318672	-0.0176494	10	10
ATP2A2	all	0.0526646	-0.026897	10	10	all	0.0206777	-0.0295411	10	10	all	0.00494294	-0.0256106	10	10	all	0.585844	-0.0435798	10	10	all	0.877224	-0.0594669	10	10	all	0.999684	-0.0515234	10	10	all	0.316281	-0.13017	10	10	all	0.528203	-0.0695572	10	10	all	0.353645	-0.0666851	10	10
ATP2A3	all	0.750127	-0.00468539	10	10	all	0.0569073	-0.0164207	10	10	all	0.100366	-0.00920747	10	10	all	0.731082	0.0215833	10	10	all	0.646882	-0.0444725	10	10	all	0.571911	-0.0189547	10	10	all	0.666268	-0.0146453	10	10	all	0.206985	-0.0750542	10	10	all	0.225896	-0.0172195	10	10
ATP2B1	ENST00000428670.3	0.275853	0.00422219	10	10	ENST00000428670.3	0.671213	0.00331472	10	10	ENST00000428670.3	0.338891	0.00392437	10	10	ENST00000261173.2	0.0912009	0.146809	10	10	ENST00000261173.2	0.0474009	0.0804748	10	10	ENST00000261173.2	0.0352393	0.112252	10	10	ENST00000261173.2	0.0923932	0.0786165	10	10	ENST00000261173.2	0.23375	0.0591053	10	10	ENST00000261173.2	0.0941959	0.0634026	10	10
ATP2B2	ENST00000383800.4	0.571435	-0.00487298	10	10	ENST00000383800.4	0.045372	-0.0125076	10	10	ENST00000383800.4	0.064507	-0.00896436	10	10	ENST00000397077.1	0.708709	-0.0657529	10	10	ENST00000383800.4	0.760694	0.0220882	10	10	ENST00000397077.1	0.667134	0.00871278	10	10	ENST00000383800.4	0.532437	0.0480229	10	10	ENST00000383800.4	0.720656	-0.0495528	10	10	ENST00000383800.4	0.642994	0.0210546	10	10
ATP2B3	ENST00000263519.4	0.218086	0.0034466	9	9	ENST00000263519.4	0.378284	-0.00232351	9	9	ENST00000349466.2	0.209643	-0.0135754	10	10	ENST00000349466.2	0.169648	-0.0510622	10	10	ENST00000263519.4	0.734791	0.067902	9	9	ENST00000349466.2	0.515312	-0.0445873	10	10	ENST00000349466.2	0.116799	-0.0604132	10	10	ENST00000263519.4	0.768142	0.0454566	9	9	ENST00000349466.2	0.429695	-0.109088	10	10
ATP2B4	all	0.785418	-0.00567906	10	10	all	0.0594854	0.0071996	10	10	all	0.267131	-0.00360299	10	10	all	0.977317	-0.0533552	10	10	all	0.653841	-0.0111654	10	10	all	0.71655	-0.024744	10	10	all	0.97427	-0.0382312	10	10	all	0.275851	-0.0169737	10	10	all	0.504605	0.000879551	10	10
ATP2C1	ENST00000510168.1,ENST00000508532.1	0.218487	0.0109068	10	10	ENST00000510168.1,ENST00000508532.1	0.424011	0.0145335	10	10	ENST00000510168.1,ENST00000508532.1	0.137934	0.010075	10	10	ENST00000510168.1,ENST00000508532.1	0.0422805	0.0228346	10	10	ENST00000510168.1,ENST00000508532.1	0.101234	0.101246	10	10	ENST00000510168.1,ENST00000508532.1	0.0381093	0.0375218	10	10	ENST00000510168.1,ENST00000508532.1	0.0207747	0.0865825	10	10	ENST00000510168.1,ENST00000508532.1	0.016205	0.0818224	10	10	ENST00000510168.1,ENST00000508532.1	0.00828391	0.0816081	10	10
ATP4A	all	0.00422093	-0.0207824	10	10	all	0.175517	-0.0379718	10	10	all	0.00592864	-0.0323576	10	10	all	0.892666	0.0334902	10	10	all	0.0663811	0.0842513	10	10	all	0.292861	0.112953	10	10	all	0.334593	-0.0892404	10	10	all	0.0988679	-0.0376885	10	10	all	0.927972	-0.0247477	10	10
ATP5A1	ENST00000398752.6	0.0176792	-0.102358	10	10	ENST00000398752.6	5.2266e-05	-0.106925	10	10	ENST00000398752.6	0.000253719	-0.104641	10	10	ENST00000398752.6	0.0149978	0.301668	10	10	ENST00000398752.6	0.192396	0.314952	10	10	ENST00000398752.6	0.0619356	0.30831	10	10	ENST00000398752.6	0.112387	0.0883785	10	10	ENST00000282050.2	0.324262	-0.136913	10	10	ENST00000282050.2	0.283144	-0.168097	10	10
ATP5B	all	1.03927e-05	-0.180212	10	10	all	1.09256e-05	-0.213929	10	10	all	4.87725e-06	-0.190673	10	10	all	0.000895	0.376654	10	10	all	0.000388583	0.402719	10	10	all	0.000508212	0.383774	10	10	all	0.312559	-0.0535003	10	10	all	0.0393061	-0.120926	10	10	all	0.0583556	-0.0788203	10	10
ATP5C1	all	0.102451	-0.0519784	10	10	all	0.033163	-0.0511068	10	10	all	0.0346461	-0.0515426	10	10	all	0.153505	0.183082	10	10	all	0.0913527	0.208465	10	10	all	0.0817437	0.115856	10	10	all	0.212087	0.0108896	10	10	all	0.240967	0.0368527	10	10	all	0.137764	0.0169221	10	10
ATP5D	all	0.862015	-0.00856912	10	10	all	0.0220717	-0.0386082	10	10	all	0.347933	-0.0355686	10	10	all	0.628074	0.107093	10	10	all	0.868585	0.119754	10	10	all	0.743096	0.103577	10	10	all	0.25695	0.0374427	10	10	all	0.347738	0.0584331	10	10	all	0.894175	0.0482113	10	10
ATP5E	all	0.314895	-0.0485872	9	9	all	0.941135	-0.0577373	9	9	all	0.691456	-0.0502567	9	9	all	0.0165167	0.150896	9	9	all	0.12407	0.253936	9	9	all	0.0315895	0.194264	9	9	all	0.192606	0.0346965	9	9	all	0.245541	0.135134	9	9	all	0.232698	0.113629	9	9
ATP5F1	all	1.77265e-06	-0.136109	10	10	all	8.69514e-07	-0.133134	10	10	all	7.51901e-07	-0.134622	10	10	all	0.00013373	-0.255633	9	9	all	0.000585893	-0.308813	9	9	all	0.000147544	-0.270622	9	9	all	1.37915e-05	-0.459057	10	10	all	3.79584e-06	-0.515356	10	10	all	8.5954e-06	-0.48629	10	10
ATP5G1	all	0.292693	0.00651291	10	10	all	0.946087	-0.00243005	10	10	all	0.769231	0.00432701	10	10	all	0.936833	-0.0326984	10	10	all	0.23919	-0.0486737	10	10	all	0.515239	-0.0751997	10	10	all	0.779864	0.0122933	10	10	all	0.215438	-0.08412	10	10	all	0.548062	-0.0536544	10	10
ATP5G2	ENST00000602871.1	0.537232	0.0078749	10	10	ENST00000602871.1	0.394297	0.00293996	10	10	ENST00000602871.1	0.593412	-0.00593374	10	10	ENST00000549164.1	0.328195	-0.0814275	10	10	ENST00000549164.1	0.0435941	-0.0890232	10	10	ENST00000549164.1	0.0615413	-0.0662642	10	10	ENST00000549164.1	0.27152	-0.0579223	10	10	ENST00000549164.1	0.108923	-0.082825	10	10	ENST00000549164.1	0.109786	-0.0577402	10	10
ATP5G3	ENST00000409194.1,ENST00000392541.3	0.18293	-0.0331041	9	9	ENST00000284727.4	0.467363	0.0192041	10	10	ENST00000409194.1,ENST00000392541.3	0.806812	-0.0101506	9	9	ENST00000409194.1,ENST00000392541.3	0.13046	0.0834136	9	9	ENST00000284727.4	0.651274	-0.0245313	10	10	ENST00000284727.4	0.414584	-0.0521707	10	10	ENST00000409194.1,ENST00000392541.3	0.654914	0.0231916	9	9	ENST00000284727.4	0.708857	0.0132361	10	10	ENST00000284727.4	0.476862	-0.0274606	10	10
ATP5H	all	0.0383405	-0.0765293	10	10	all	9.24857e-05	-0.0670186	10	10	all	0.00144293	-0.0717055	10	10	all	0.00798595	0.306436	10	10	all	0.00136371	0.309286	10	10	all	0.00196564	0.306763	10	10	all	0.00712694	0.132564	10	10	all	0.03936	0.145799	10	10	all	0.00975433	0.139181	10	10
ATP5I	all	0.00226958	-0.067834	10	10	all	0.10653	-0.0814312	10	10	all	0.00866351	-0.0746326	10	10	all	0.483658	0.153674	10	10	all	0.241703	0.013129	10	10	all	0.322255	0.135721	10	10	all	0.992564	-0.0552945	10	10	all	0.457891	-0.0986845	10	10	all	0.616412	-0.0819401	10	10
ATP5J	ENST00000400094.1,ENST00000284971.3	0.00155051	-0.051876	10	10	ENST00000400090.3,ENST00000400087.3,ENST00000400093.3	0.0513574	-0.0153928	10	10	ENST00000400094.1,ENST00000284971.3	0.00875312	-0.0374889	10	10	ENST00000400094.1,ENST00000284971.3	0.0329892	0.109028	10	10	ENST00000400090.3,ENST00000400087.3,ENST00000400093.3	0.248961	0.0838396	10	10	ENST00000400094.1,ENST00000284971.3	0.182704	0.0748542	10	10	ENST00000400094.1,ENST00000284971.3	0.648297	-0.0402847	10	10	ENST00000400094.1,ENST00000284971.3	0.554103	-0.0304363	10	10	ENST00000400094.1,ENST00000284971.3	0.522752	-0.0231629	10	10
ATP5J2	ENST00000394186.3	0.00786504	-0.0931349	10	10	ENST00000394186.3	0.00593498	-0.0985515	10	10	ENST00000394186.3	0.00243832	-0.0957593	10	10	ENST00000394186.3	3.10507e-05	0.39351	10	10	ENST00000394186.3	4.20081e-05	0.380553	10	10	ENST00000394186.3	1.49113e-05	0.387032	10	10	ENST00000394186.3	2.71404e-05	0.160492	10	10	ENST00000394186.3	4.99832e-05	0.141009	10	10	ENST00000394186.3	1.03645e-05	0.149893	10	10
ATP5J2-PTCD1	all	0.0160366	-0.0685888	10	10	all	0.0018668	-0.076499	10	10	all	0.0048176	-0.07246	10	10	all	1.48192e-05	0.364751	10	10	all	0.000155522	0.359181	10	10	all	8.43965e-06	0.361966	10	10	all	7.82354e-06	0.181491	10	10	all	0.00135633	0.153075	10	10	all	3.37029e-05	0.166319	10	10
ATP5L	all	0.0792042	-0.0546085	10	10	all	0.204929	-0.0545193	10	10	all	0.0603266	-0.0531052	10	10	all	0.745712	0.131824	10	10	all	0.651966	0.204531	10	10	all	0.935899	0.126985	10	10	all	0.294979	-0.0177831	10	10	all	0.883866	0.0274427	10	10	all	0.832328	0.0142371	10	10
ATP5L2	all	0.0975026	-0.0320925	9	9	all	0.014843	-0.0260967	9	9	all	0.0267237	-0.0275026	9	9	all	0.856485	0.0402569	9	9	all	0.569796	0.0623547	9	9	all	0.763964	0.0583597	9	9	all	0.668817	-0.00490361	9	9	all	0.934537	-0.0326419	9	9	all	0.775659	-0.0322704	9	9
ATP5O	all	0.271988	-0.0973312	10	10	all	0.125769	-0.0895339	10	10	all	0.150831	-0.0934325	10	10	all	0.0161642	0.388624	10	10	all	0.239257	0.340011	10	10	all	0.0679858	0.364318	10	10	all	0.0197694	0.103909	10	10	all	0.444763	0.0764313	10	10	all	0.0911459	0.09017	10	10
ATP5S	all	0.904769	0.0182932	10	10	all	0.118671	-0.0248696	10	10	all	0.426681	-0.0029175	10	10	all	0.0110923	-0.146327	10	10	all	0.69154	-0.0446016	10	10	all	0.0907571	-0.104253	10	10	all	0.0116985	-0.0967565	10	10	all	0.187288	-0.0772369	10	10	all	0.0266882	-0.0795348	10	10
ATP5SL	all	0.000160915	-0.0829131	10	10	all	0.0839088	-0.0435095	10	10	all	0.000206672	-0.0588076	10	10	all	0.00103826	0.237541	10	10	all	0.000763496	0.137837	10	10	all	0.000640385	0.226979	10	10	all	0.166296	0.085761	10	10	all	0.00487631	0.0559648	10	10	all	0.0137482	0.0525589	10	10
ATP6AP1	all	0.000179983	-0.110969	10	10	all	2.87207e-05	-0.0949506	10	10	all	8.73191e-06	-0.10296	10	10	all	0.215582	0.141362	9	9	all	0.341337	0.00407349	10	10	all	0.0896347	0.111454	9	9	all	0.00696807	-0.167517	10	10	all	0.00213273	-0.195426	10	10	all	0.00222443	-0.181472	10	10
ATP6AP1L	ENST00000380167.4	0.145112	-0.0179237	10	10	ENST00000380167.4	0.359032	0.00515409	10	10	ENST00000439350.1	0.448168	0.0156054	10	10	ENST00000439350.1	0.0388638	0.0942837	10	10	ENST00000380167.4	0.00505369	0.126569	10	10	ENST00000380167.4	0.0113853	0.0903163	10	10	ENST00000439350.1	0.0197486	0.0989668	10	10	ENST00000380167.4	0.00251788	0.108218	10	10	ENST00000439350.1	0.0196444	0.085754	10	10
ATP6AP2	all	0.0286853	-0.0397094	10	10	all	0.364713	-0.012595	10	10	all	0.0336603	-0.0279127	10	10	all	0.0267931	0.213503	10	10	all	0.0660139	0.175917	10	10	all	0.0320261	0.184786	10	10	all	0.117724	0.0911828	10	10	all	0.20285	0.133509	10	10	all	0.121338	0.0945183	10	10
ATP6V0A1	all	0.272827	0.0172119	10	10	all	0.356168	0.00318832	10	10	all	0.121137	0.00230795	10	10	all	0.122481	0.110743	10	10	all	0.37732	-0.086578	10	10	all	0.774368	0.0369919	10	10	all	0.0596263	0.106964	10	10	all	0.556791	-0.0338722	10	10	all	0.611884	0.0771312	10	10
ATP6V0A2	all	0.343064	-0.00626951	10	10	all	0.716547	-0.00759659	10	10	all	0.672813	-0.0046994	10	10	all	0.512478	-0.0311962	10	10	all	0.269381	-0.0656486	10	10	all	0.177919	-0.0249687	10	10	all	0.383834	-0.0330068	10	10	all	0.31192	-0.0505116	10	10	all	0.129563	-0.024046	10	10
ATP6V0A4	ENST00000310018.2,ENST00000353492.4	0.369654	-0.00425324	10	10	ENST00000393054.1	0.266406	0.00745366	10	10	ENST00000310018.2,ENST00000353492.4	0.159033	-0.00689774	10	10	ENST00000310018.2,ENST00000353492.4	0.837773	-0.0110768	10	10	ENST00000310018.2,ENST00000353492.4	0.248636	-0.0391252	10	10	ENST00000310018.2,ENST00000353492.4	0.339249	0.00274921	10	10	ENST00000310018.2,ENST00000353492.4	0.385069	-0.0177521	10	10	ENST00000310018.2,ENST00000353492.4	0.151863	-0.0978997	10	10	ENST00000310018.2,ENST00000353492.4	0.131606	-0.0314791	10	10
ATP6V0B	all	0.39022	-0.0133615	10	10	all	0.469027	-0.0277877	10	10	all	0.376397	-0.0201788	10	10	all	0.723273	-0.0793366	10	10	all	0.836316	0.0250679	10	10	all	0.695941	-0.0750599	10	10	all	0.391999	-0.0650984	10	10	all	0.730823	-0.0294232	10	10	all	0.760024	-0.063887	10	10
ATP6V0C	all	0.877267	0.0107851	10	10	all	0.128614	0.0133547	10	10	all	0.339348	0.00755233	10	10	all	0.313781	-0.0653138	10	10	all	0.854504	-0.0198542	10	10	all	0.479521	-0.0265245	10	10	all	0.328125	-0.0268191	10	10	all	0.718375	0.0236198	10	10	all	0.666256	-0.00700999	10	10
ATP6V0D1	all	0.252543	-0.0462541	10	10	all	0.0361288	-0.0355667	10	10	all	0.0831997	-0.0409104	10	10	all	0.0506229	0.164473	10	10	all	0.815142	-0.041813	10	10	all	0.221238	0.112136	10	10	all	0.109477	0.066088	10	10	all	0.397936	-0.0961969	10	10	all	0.822813	-0.0255926	10	10
ATP6V0D2	all	0.0662096	-0.0163065	10	10	all	0.630533	-0.00529077	10	10	all	0.0839063	-0.0105804	10	10	all	0.216301	0.0789864	10	10	all	0.407247	0.0558138	10	10	all	0.235354	0.0613886	10	10	all	0.537232	0.0173254	10	10	all	0.550365	0.0204917	10	10	all	0.54573	0.0418052	10	10
ATP6V0E1	all	0.626039	0.00452405	10	10	all	0.981566	-0.00745542	10	10	all	0.439621	0.00311174	10	10	all	0.21807	0.0691304	10	10	all	0.408912	0.16715	10	10	all	0.265227	0.0957385	10	10	all	0.397616	0.150263	10	10	all	0.295517	0.0902407	10	10	all	0.252363	0.120252	10	10
ATP6V0E2	all	0.760001	-0.0182679	10	10	all	0.840036	-0.0251355	10	10	all	0.815939	-0.0217017	10	10	all	0.807821	0.042158	10	10	all	0.986605	-0.0147396	10	10	all	0.923035	0.0474455	10	10	all	0.995178	-0.0213411	10	10	all	0.931382	-0.0418358	10	10	all	0.780945	-0.0188889	10	10
ATP6V1A	all	0.00323217	-0.145586	9	9	all	0.0144875	-0.142215	8	8	all	0.0188798	-0.135292	8	8	all	0.0644258	0.170224	8	8	all	0.117424	0.118554	8	8	all	0.0746209	0.169809	8	8	all	0.0883467	-0.228911	9	9	all	0.0548443	-0.137836	8	8	all	0.126189	-0.143799	8	8
ATP6V1B1	all	0.477086	-0.0156908	10	10	all	0.212973	0.0238935	10	10	all	0.135993	0.00404996	10	10	all	0.678124	0.0481049	10	10	all	0.632492	-0.0466231	10	10	all	0.921417	0.0191456	10	10	all	0.429614	0.0167688	10	10	all	0.726072	-0.00168911	10	10	all	0.616174	-0.0103371	10	10
ATP6V1B2	all	3.20755e-05	-0.121384	10	10	all	2.25082e-06	-0.0973374	10	10	all	1.62288e-06	-0.102568	10	10	all	0.713794	-0.0177356	9	9	all	0.999762	0.00247575	9	9	all	0.686321	-0.0126249	9	9	all	0.00205559	-0.280845	10	10	all	3.46444e-05	-0.295638	10	10	all	0.000135417	-0.276391	10	10
ATP6V1C1	all	2.64041e-07	-0.139147	10	10	all	6.59332e-07	-0.148143	10	10	all	2.81051e-07	-0.143645	10	10	all	6.19084e-06	0.282916	10	10	all	6.00247e-05	0.237302	10	10	all	9.8038e-06	0.257422	10	10	all	0.664831	-0.0405225	10	10	all	0.0430356	-0.119033	10	10	all	0.131519	-0.0598867	10	10
ATP6V1C2	all	0.538388	0.0068267	10	10	all	0.498295	-0.0121338	10	10	all	0.914946	-0.00430373	10	10	all	0.0405002	0.103861	10	10	all	0.258197	0.0770721	10	10	all	0.077204	0.0904665	10	10	all	0.0120795	0.0828681	10	10	all	0.346406	0.0134175	10	10	all	0.0494358	0.0608473	10	10
ATP6V1D	all	0.925742	-0.00781773	10	10	all	0.837122	-0.00493395	10	10	all	0.897743	-0.00425429	10	10	all	0.42124	-0.0527863	10	10	all	0.71883	0.103384	10	10	all	0.872523	0.0346553	10	10	all	0.28182	-0.0428051	10	10	all	0.691455	0.0514781	10	10	all	0.887383	0.0139792	10	10
ATP6V1E1	all	0.0673771	-0.0225824	10	10	all	0.0328611	-0.0352363	10	10	all	0.0217927	-0.0307123	10	10	all	0.261304	0.0679367	10	10	all	0.188435	0.043167	10	10	all	0.192714	0.0561055	10	10	all	0.965307	-0.0245332	10	10	all	0.990855	-0.0243648	10	10	all	0.869195	-0.0122036	10	10
ATP6V1E2	ENST00000522587.1	0.18703	0.00720681	10	10	ENST00000522587.1	0.210719	-0.00107934	10	10	ENST00000522587.1	0.201905	0.00731532	10	10	ENST00000306448.4	0.535858	-0.031329	10	10	ENST00000522587.1	0.421044	0.11617	10	10	ENST00000522587.1	0.550627	0.0379463	10	10	ENST00000306448.4	0.628161	0.0202146	10	10	ENST00000522587.1	0.20237	0.0804012	10	10	ENST00000522587.1	0.361623	0.0762081	10	10
ATP6V1F	all	0.422914	-0.0145973	10	10	all	0.000971505	-0.0247576	10	10	all	0.0242574	-0.0257319	10	10	all	0.063531	0.143884	10	10	all	0.0503764	0.0833266	10	10	all	0.0266863	0.107236	10	10	all	0.105467	0.0944731	10	10	all	0.609277	-0.0153301	10	10	all	0.187782	0.0577662	10	10
ATP6V1G1	all	6.8679e-07	-0.135481	10	10	all	9.05373e-05	-0.151895	10	10	all	2.33823e-06	-0.143688	10	10	all	5.6205e-05	0.331903	10	10	all	0.000145192	0.329627	10	10	all	8.32555e-05	0.330765	10	10	all	0.742087	0.00888785	10	10	all	0.970138	-0.0258251	10	10	all	0.715591	0.0227647	10	10
ATP6V1G2	all	0.659219	0.0126095	10	10	all	0.695725	-0.000836823	10	10	all	0.971541	0.00148322	10	10	all	0.986786	0.0258858	10	10	all	0.992378	0.0240361	10	10	all	0.972504	0.00722234	10	10	all	0.560046	0.043709	10	10	all	0.796509	0.0224311	10	10	all	0.79539	0.0289681	10	10
ATP6V1G3	ENST00000281087.2	0.0217317	-0.0141202	6	6	all	0.341266	-0.00487713	4	4	ENST00000281087.2	0.0637383	-0.00872775	6	6	ENST00000281087.2	0.239607	-0.0534988	6	6	ENST00000281087.2	0.202639	-0.0393932	6	6	ENST00000281087.2	0.152466	-0.0341921	6	6	ENST00000281087.2	0.0491979	-0.0660196	6	6	ENST00000281087.2	0.148136	-0.025826	6	6	ENST00000281087.2	0.0609557	-0.0648535	6	6
ATP6V1H	all	0.0338871	-0.0169296	10	10	all	0.58732	-0.00236787	10	10	all	0.0775859	-0.0110607	10	10	all	0.351762	0.118937	10	10	all	0.0963842	0.0499827	10	10	all	0.150795	0.0962557	10	10	all	0.674213	0.0318492	10	10	all	0.120336	0.0762715	10	10	all	0.332132	0.0370032	10	10
ATP7A	all	0.575743	-0.0115547	10	10	all	0.0269381	0.0172381	10	10	all	0.222872	-0.000198291	10	10	all	0.506492	0.0191164	10	10	all	0.818787	0.0146503	10	10	all	0.930589	0.0282989	10	10	all	0.737438	-0.0287488	10	10	all	0.564016	0.0336482	10	10	all	0.600116	0.0202875	10	10
ATP7B	all	0.500695	0.00357073	9	9	all	0.83099	-0.00714477	9	9	all	0.671698	0.00248928	9	9	all	0.760977	0.0126267	9	9	all	0.716018	0.00400815	9	9	all	0.980437	-0.00899336	9	9	all	0.92864	-0.0229222	9	9	all	0.744834	0.00405012	9	9	all	0.837196	-0.00943605	9	9
ATP8A1	all	0.170767	-0.00435877	10	10	all	0.831918	-0.0111264	10	10	all	0.346889	-0.00902627	10	10	all	0.272827	0.0777653	10	10	all	0.833756	0.0271352	10	10	all	0.650992	0.0366142	10	10	all	0.534405	0.0618703	10	10	all	0.666069	-0.0151623	10	10	all	0.918095	0.0239455	10	10
ATP8A2	all	0.71055	0.00562704	10	10	all	0.266382	0.00513993	10	10	all	0.680422	0.00535021	10	10	all	0.140053	0.110504	10	10	all	0.314515	0.0824385	10	10	all	0.162551	0.0909313	10	10	all	0.161	0.0913897	10	10	all	0.187874	0.0697333	10	10	all	0.157309	0.0787165	10	10
ATP8B1	ENST00000536015.1	0.755746	0.00893738	10	10	ENST00000283684.4	0.400789	-0.0107058	10	10	ENST00000283684.4	0.540589	-0.0108625	10	10	ENST00000283684.4	0.516198	-0.0465902	10	10	ENST00000283684.4	0.197931	-0.124362	10	10	ENST00000283684.4	0.341888	-0.109454	10	10	ENST00000283684.4	0.584018	-0.0553603	10	10	ENST00000283684.4	0.193345	-0.116826	10	10	ENST00000283684.4	0.322639	-0.101371	10	10
ATP8B2	all	0.0554958	-0.0859596	9	9	all	0.751159	-0.0225952	9	9	all	0.207836	-0.059456	9	9	all	0.395443	0.103908	9	9	all	0.558002	0.116102	9	9	all	0.365078	0.0841657	9	9	all	0.940809	-0.14752	9	9	all	0.957753	0.0398749	9	9	all	0.976799	-0.0560879	9	9
ATP8B3	all	0.100646	-0.00749732	10	10	all	0.289982	0.0154035	10	10	all	0.630693	0.00296236	10	10	all	0.703459	-0.000922927	10	10	all	0.996347	-0.0199043	10	10	all	0.754766	0.0298499	10	10	all	0.326703	-0.0117204	10	10	all	0.63783	-0.0130221	10	10	all	0.635397	0.027405	10	10
ATP8B4	ENST00000284509.6	0.171155	-0.00605632	10	10	ENST00000559829.1	0.669936	0.0207832	10	10	ENST00000284509.6	0.212823	-0.0110204	10	10	ENST00000284509.6	0.201359	0.0872024	10	10	ENST00000559829.1	0.409747	0.0708228	10	10	ENST00000284509.6	0.334919	0.0758501	10	10	ENST00000284509.6	0.331518	0.0171496	10	10	ENST00000559829.1	0.376732	0.0773241	10	10	ENST00000284509.6	0.590714	0.035223	10	10
ATP9A	all	0.693502	-0.00361922	10	10	all	0.420256	0.00186181	10	10	all	0.878447	-0.00142485	10	10	all	0.820676	-0.0142459	10	10	all	0.966409	-0.0455889	10	10	all	0.814258	-0.0285932	10	10	all	0.763531	-0.0202981	10	10	all	0.846965	-0.0277574	10	10	all	0.842751	0.01907	10	10
ATP9B	all	0.736075	-0.0023233	10	10	all	0.931975	-0.00813234	10	10	all	0.991474	0.00266545	10	10	all	0.177147	-0.072622	10	10	all	0.630522	-0.0235833	10	10	all	0.332147	-0.0311147	10	10	all	0.18703	-0.0497704	10	10	all	0.477163	0.0275702	10	10	all	0.270264	-0.0456283	10	10
ATPAF1	all	0.183165	-0.00392987	9	9	all	0.456711	-0.0205916	9	9	all	0.0889991	0.00134523	9	9	all	0.874623	-0.00629339	9	9	all	0.274356	0.0374701	9	9	all	0.59109	0.0203728	9	9	all	0.830821	-0.0317158	9	9	all	0.167848	-0.0340348	9	9	all	0.324226	-0.0269678	9	9
ATPAF2	all	0.465301	-0.0686942	10	10	all	0.0474371	-0.0811674	10	10	all	0.106596	-0.0768301	10	10	all	0.760952	0.0405353	10	10	all	0.760048	0.0169156	10	10	all	0.774888	0.0244673	10	10	all	0.711939	-0.101679	10	10	all	0.214519	-0.109054	10	10	all	0.741411	-0.127824	10	10
ATPIF1	all	0.50121	0.00746458	10	10	all	0.420973	-0.0166994	10	10	all	0.84973	-0.00309404	10	10	all	0.637489	0.0290522	10	10	all	0.765737	-0.0246713	10	10	all	0.556006	-0.0189528	10	10	all	0.528735	0.0409021	10	10	all	0.996441	-0.00034259	10	10	all	0.580838	0.0138199	10	10
ATR	all	9.50297e-05	-0.152598	10	10	all	7.0708e-06	-0.154001	10	10	all	2.23032e-05	-0.142411	10	10	all	0.00194803	-0.373737	10	10	all	0.0360338	-0.197132	10	10	all	0.00161356	-0.277057	10	10	all	4.39589e-05	-0.55586	10	10	all	4.23613e-06	-0.377253	10	10	all	6.15087e-06	-0.466557	10	10
ATRAID	all	0.651224	-0.013332	10	10	all	0.667962	0.00696583	10	10	all	0.738568	0.00255349	10	10	all	0.245153	0.280566	10	10	all	0.0917982	0.30525	10	10	all	0.193682	0.350888	10	10	all	0.393657	0.315974	10	10	all	0.0416925	0.277713	10	10	all	0.188655	0.294097	10	10
ATRIP	all	0.107735	-0.0421682	10	10	all	0.0120224	-0.0450035	10	10	all	0.0108538	-0.0425404	10	10	all	0.0169768	-0.151773	10	10	all	0.439783	-0.0466941	10	10	all	0.0512895	-0.110848	10	10	all	0.0110003	-0.184161	10	10	all	0.0561496	-0.12825	10	10	all	0.01717	-0.14737	10	10
ATRN	all	0.224205	-0.0277578	10	10	all	0.941905	0.00326198	10	10	all	0.198647	-0.0140872	10	10	all	0.676549	0.0291599	9	9	all	0.935574	-0.0159844	10	10	all	0.780123	0.0266203	9	9	all	0.751113	-0.0259713	10	10	all	0.995089	0.026064	10	10	all	0.843725	0.0174975	10	10
ATRNL1	all	0.0617681	0.0185907	10	10	all	0.529062	-0.0160529	10	10	all	0.552096	0.00612078	10	10	all	0.111478	0.0876621	10	10	all	0.413998	0.049321	10	10	all	0.198104	0.0853997	10	10	all	0.0156633	0.0836373	10	10	all	0.599625	0.0357832	10	10	all	0.106436	0.0744584	10	10
ATRX	all	0.0139773	-0.0505195	10	10	all	0.000275788	-0.0445172	10	10	all	0.000397267	-0.04238	10	10	all	0.000289034	-0.147583	10	10	all	0.00144227	-0.148044	10	10	all	0.000244535	-0.140148	10	10	all	0.000105917	-0.211632	10	10	all	0.000213986	-0.194406	10	10	all	8.53779e-05	-0.192003	10	10
ATXN1	all	0.286034	-0.014228	10	10	all	0.648263	0.00578693	10	10	all	0.548925	-0.00494249	10	10	all	0.451754	0.00326242	10	10	all	0.665056	0.0317818	10	10	all	0.431487	0.00934483	10	10	all	0.910634	-0.0171729	10	10	all	0.531791	0.0294642	10	10	all	0.695433	-0.0149388	10	10
ATXN10	all	0.00131556	-0.221178	10	10	all	0.0096115	-0.202803	10	10	all	0.00210029	-0.211991	10	10	all	0.0483028	0.249359	9	9	all	0.0788639	0.0830901	9	9	all	0.0425993	0.156872	9	9	all	0.0884173	-0.209088	10	10	all	0.0169219	-0.309514	10	10	all	0.019883	-0.259301	10	10
ATXN1L	all	0.268552	-0.0263071	10	10	all	0.69886	-0.0231054	10	10	all	0.560063	-0.0228559	10	10	all	0.870855	-0.0181862	10	10	all	0.163174	0.00717003	10	10	all	0.364839	0.000946234	10	10	all	0.611662	-0.071309	10	10	all	0.611057	0.0234834	10	10	all	0.857639	-0.0514912	10	10
ATXN2	all	0.9329	-0.0189585	9	9	all	0.863309	-0.00485191	9	9	all	0.663804	-0.00647446	9	9	all	0.276665	0.121525	9	9	all	0.00311303	0.167839	9	9	all	0.00798373	0.138507	9	9	all	0.146747	0.0583043	9	9	all	0.00112703	0.118754	9	9	all	0.0046045	0.0950797	9	9
ATXN2L	ENST00000340394.8,ENST00000325215.6,ENST00000395547.2,ENST00000336783.4,ENST00000382686.4,ENST00000564304.1	0.0213978	-0.0263755	2	2	ENST00000325215.6,ENST00000395547.2,ENST00000336783.4,ENST00000382686.4,ENST00000564304.1,ENST00000570200.1	0.0876958	0.0164057	2	2	ENST00000340394.8,ENST00000325215.6,ENST00000395547.2,ENST00000336783.4,ENST00000382686.4,ENST00000564304.1	0.0277656	-0.016031	2	2	ENST00000340394.8,ENST00000325215.6,ENST00000395547.2,ENST00000336783.4,ENST00000382686.4,ENST00000564304.1	0.0287258	0.16754	2	2	ENST00000340394.8,ENST00000325215.6,ENST00000395547.2,ENST00000336783.4,ENST00000382686.4,ENST00000564304.1	0.0585799	0.12745	2	2	ENST00000340394.8,ENST00000325215.6,ENST00000395547.2,ENST00000336783.4,ENST00000382686.4,ENST00000564304.1	0.0316406	0.147495	2	2	ENST00000340394.8,ENST00000325215.6,ENST00000395547.2,ENST00000336783.4,ENST00000382686.4,ENST00000564304.1	0.1036	0.0927746	2	2	ENST00000340394.8,ENST00000325215.6,ENST00000395547.2,ENST00000336783.4,ENST00000382686.4,ENST00000564304.1	0.0588328	0.092687	2	2	ENST00000340394.8,ENST00000325215.6,ENST00000395547.2,ENST00000336783.4,ENST00000382686.4,ENST00000564304.1	0.0637617	0.0927308	2	2
ATXN3	all	0.5294	-0.00640557	10	10	all	0.517261	-0.00710385	10	10	all	0.338092	-0.00427917	10	10	all	0.916129	-0.0796453	10	10	all	0.307818	0.00958668	10	10	all	0.438479	-0.0654363	10	10	all	0.8363	-0.0139469	10	10	all	0.37991	-0.0495923	10	10	all	0.572886	-0.0562686	10	10
ATXN3L	all	0.380818	-0.0163733	10	10	all	0.698734	-0.0082554	10	10	all	0.982273	-0.0129968	10	10	all	0.661118	0.0310116	10	10	all	0.485318	0.0388235	10	10	all	0.416724	0.0310011	10	10	all	0.622121	-0.00604201	10	10	all	0.839985	0.0351043	10	10	all	0.955232	0.0315079	10	10
ATXN7	ENST00000398590.3	0.777308	0.0143842	10	10	ENST00000538065.1	0.0405137	0.0264321	10	10	ENST00000538065.1	0.0708079	0.0102432	10	10	ENST00000398590.3	0.0734451	-0.0650504	10	10	ENST00000398590.3	0.034039	-0.190638	10	10	ENST00000398590.3	0.0428787	-0.107718	10	10	ENST00000398590.3	0.194135	-0.0171827	9	9	ENST00000398590.3	0.0665377	-0.0547507	9	9	ENST00000398590.3	0.108968	-0.027594	9	9
ATXN7L1	all	0.971297	-0.0105734	10	10	all	0.778066	-0.00966647	10	10	all	0.754065	-0.011007	10	10	all	0.473482	-0.0213777	10	10	all	0.454034	-0.0543845	10	10	all	0.389415	-0.0612461	10	10	all	0.341399	-0.0180645	10	10	all	0.367476	-0.0683293	10	10	all	0.271642	-0.050365	10	10
ATXN7L2	all	0.109052	0.0124656	10	10	all	0.109666	0.0207883	10	10	all	0.0401612	0.00817527	10	10	all	0.0612352	-0.0207749	10	10	all	0.894365	-0.0380071	10	10	all	0.360839	-0.0302585	10	10	all	0.14308	-0.00108364	10	10	all	0.434702	0.0170346	10	10	all	0.734587	-0.00619806	10	10
ATXN7L3	ENST00000389384.4	0.201138	0.0166864	9	9	all	0.483991	0.00551351	1	1	ENST00000389384.4	0.319489	0.00498348	9	9	ENST00000454077.2	0.584897	-0.0251822	9	9	all	0.185048	0.0791664	1	1	ENST00000454077.2	0.343934	-0.0125106	9	9	ENST00000389384.4	0.535385	0.0724288	9	9	all	0.147512	0.0740959	1	1	all	0.285622	0.0376917	1	1
ATXN7L3B	all	0.32028	0.0107575	10	10	all	0.920172	-0.00148635	10	10	all	0.578168	0.00720531	10	10	all	0.0578274	-0.0979608	10	10	all	0.0489248	-0.113917	10	10	all	0.0280971	-0.101329	10	10	all	0.194227	-0.0797454	10	10	all	0.0479197	-0.0907037	10	10	all	0.0372129	-0.0666203	10	10
AUH	all	0.855494	0.0101856	10	10	all	0.0479894	-0.0164724	10	10	all	0.360681	-0.00418281	10	10	all	0.665959	-0.0472942	10	10	all	0.742634	-0.0111502	10	10	all	0.929869	0.0184443	10	10	all	0.63113	0.0191636	10	10	all	0.257193	-0.0188768	10	10	all	0.793994	-0.0223331	10	10
AUNIP	all	0.98337	0.00690576	10	10	all	0.180778	0.0085049	10	10	all	0.36924	0.00571405	10	10	all	0.458305	-0.0164991	10	10	all	0.289195	-0.1039	10	10	all	0.269229	-0.0280685	10	10	all	0.619011	-0.027874	10	10	all	0.825754	-0.0453358	10	10	all	0.708933	-0.0314518	10	10
AUP1	all	0.424157	-0.0265729	10	10	all	0.197579	-0.00539471	10	10	all	0.19574	-0.0136329	10	10	all	0.0125894	-0.100141	10	10	all	0.00049177	-0.155759	10	10	all	0.000297801	-0.113917	10	10	all	0.00288028	-0.103845	10	10	all	0.000644292	-0.149943	10	10	all	0.000195552	-0.116008	10	10
AURKA	all	0.00374414	-0.156438	10	10	all	0.159033	-0.0740942	9	9	all	0.0112031	-0.0909747	9	9	all	0.048215	-0.161954	9	9	all	0.0345958	-0.229708	9	9	all	0.0168208	-0.187484	9	9	all	0.000539205	-0.342065	10	10	all	0.0489459	-0.317595	9	9	all	0.0126177	-0.319298	9	9
AURKAIP1	ENST00000338370.3,ENST00000321751.5,ENST00000378853.3	0.197645	-0.0440652	10	10	ENST00000338338.5	0.164822	-0.0100872	9	9	ENST00000338338.5	0.169747	-0.0130659	9	9	ENST00000338338.5,ENST00000378853.3	0.193241	0.0732899	1	1	ENST00000338338.5,ENST00000378853.3	0.29621	-0.0509936	1	1	ENST00000338370.3,ENST00000321751.5,ENST00000378853.3	0.383148	-0.0117876	10	10	ENST00000338370.3,ENST00000321751.5,ENST00000378853.3	0.0325932	-0.074347	10	10	ENST00000338370.3,ENST00000321751.5,ENST00000378853.3	0.0661048	-0.0222618	10	10	ENST00000338370.3,ENST00000321751.5,ENST00000378853.3	0.0236236	-0.0631648	10	10
AURKB	all	0.0053139	-0.0756388	6	6	all	0.00404536	-0.0632373	6	6	all	0.00507067	-0.0694381	6	6	all	0.0556124	0.23242	6	6	all	0.39488	0.0487382	5	5	all	0.491495	0.0432537	4	4	all	0.372608	-0.03784	7	7	all	0.194765	-0.171527	6	6	all	0.0545512	-0.0943377	6	6
AURKC	ENST00000599062.1	0.220219	-0.012151	1	1	ENST00000598785.1	0.275203	-0.0190419	9	9	ENST00000302804.7,ENST00000599062.1	0.231102	-0.0109664	5	5	ENST00000302804.7,ENST00000599062.1	0.116363	-0.0709144	5	5	ENST00000415300.2,ENST00000448930.1,ENST00000302804.7,ENST00000599062.1	0.101031	0.0647023	4	4	ENST00000415300.2,ENST00000448930.1,ENST00000302804.7,ENST00000599062.1	0.0975846	0.0538969	4	4	ENST00000302804.7,ENST00000599062.1	0.102164	-0.0662055	5	5	ENST00000415300.2,ENST00000448930.1,ENST00000302804.7,ENST00000599062.1	0.0723963	0.0573078	4	4	ENST00000415300.2,ENST00000448930.1,ENST00000302804.7,ENST00000599062.1	0.060605	0.0513065	4	4
AVEN	all	0.311504	-0.00560254	10	10	all	0.184674	-0.00930932	10	10	all	0.0718193	-0.00562626	10	10	all	0.104164	-0.033112	10	10	all	0.472437	0.0545656	10	10	all	0.718834	-0.0243665	10	10	all	0.053344	-0.0361932	10	10	all	0.699885	0.0173211	10	10	all	0.46822	-0.0272848	10	10
AVIL	all	0.0102289	-0.0377515	10	10	all	0.658042	0.00246392	10	10	all	0.0725901	-0.0176299	10	10	all	0.0343936	0.199139	10	10	all	0.645015	-0.00574563	10	10	all	0.164948	0.113584	10	10	all	0.148018	0.128568	10	10	all	0.847717	0.0343999	10	10	all	0.409762	0.0871956	10	10
AVL9	all	0.0190537	-0.0449686	10	10	all	0.0429283	-0.0235032	10	10	all	0.0110596	-0.0336286	10	10	all	0.075448	0.109745	10	10	all	0.329764	0.0240145	10	10	all	0.0823211	0.0725941	10	10	all	0.417962	-0.00720309	10	10	all	0.966627	0.0065523	10	10	all	0.566056	-0.0112441	10	10
AVP	all	0.242112	0.0156774	10	10	all	0.704556	-0.0197554	10	10	all	0.675125	-3.68089e-05	10	10	all	0.367052	0.0170747	10	10	all	0.178602	-0.0415588	10	10	all	0.259205	-0.077507	10	10	all	0.660283	0.0276095	10	10	all	0.117174	-0.0509776	10	10	all	0.255705	-0.0600235	10	10
AVPI1	all	0.0332932	-0.0169257	10	10	all	0.575704	-0.00626043	10	10	all	0.100272	-0.015746	10	10	all	0.487974	0.00925358	10	10	all	0.945739	-0.042367	10	10	all	0.633803	-0.0293909	10	10	all	0.850488	-0.0286582	10	10	all	0.605644	-0.0139774	10	10	all	0.648107	-0.0213178	10	10
AVPR1A	all	0.926101	0.00398742	10	10	all	0.0738511	-0.0148568	10	10	all	0.191823	-0.0043036	10	10	all	0.623228	-0.019088	10	10	all	0.664686	0.11534	10	10	all	0.748752	0.0304578	10	10	all	0.589851	-0.0107622	10	10	all	0.926221	0.00300212	10	10	all	0.960277	0.0115996	10	10
AVPR1B	all	0.06693	-0.0107709	10	10	all	0.00441263	-0.0156253	10	10	all	0.00240205	-0.0122835	10	10	all	0.348352	0.0668137	10	10	all	0.0777613	0.0547715	10	10	all	0.0495574	0.028936	10	10	all	0.841466	0.030086	10	10	all	0.30516	0.0193086	10	10	all	0.264848	0.00132678	10	10
AVPR2	ENST00000337474.5	0.271495	-0.00615911	10	10	ENST00000358927.2	0.526587	-0.0157132	10	10	ENST00000358927.2	0.221672	-0.0093201	10	10	ENST00000337474.5	0.176151	0.0465373	10	10	ENST00000337474.5	0.182022	0.0300485	10	10	ENST00000337474.5	0.0909301	0.0275291	10	10	ENST00000337474.5	0.234845	0.0164105	10	10	ENST00000337474.5	0.221929	0.0124793	10	10	ENST00000337474.5	0.149017	0.00988265	10	10
AWAT1	all	0.648541	-0.00524416	10	10	all	0.648019	-0.00286598	10	10	all	0.587168	-0.00359698	10	10	all	0.688291	0.00986505	10	10	all	0.183135	0.0050807	10	10	all	0.314732	0.00747288	10	10	all	0.80612	0.00117378	10	10	all	0.286717	-0.0233087	10	10	all	0.40121	-0.036054	10	10
AWAT2	all	0.494977	-0.00308937	10	10	all	0.636124	-0.00920426	10	10	all	0.827197	-0.00541598	10	10	all	0.196497	0.0438756	10	10	all	0.957939	-0.0148442	10	10	all	0.497711	0.0415458	10	10	all	0.296413	0.0171757	10	10	all	0.925459	-0.0106467	10	10	all	0.533101	0.0130621	10	10
AXDND1	all	0.312829	0.0194667	10	10	all	0.0306861	-0.0312868	10	10	all	0.318458	-0.00636125	10	10	all	0.0090996	-0.111157	10	10	all	0.780447	0.041064	10	10	all	0.133379	-0.020132	10	10	all	0.0492966	-0.0914659	10	10	all	0.675123	-0.0430394	10	10	all	0.0555131	-0.0270285	10	10
AXIN1	all	0.292485	0.00640118	10	10	all	0.587632	-0.00601773	10	10	all	0.384813	0.000225616	10	10	all	0.620513	-0.012659	10	10	all	0.558394	0.0335381	10	10	all	0.955632	0.0570359	10	10	all	0.891493	0.0356321	10	10	all	0.814384	0.0294881	10	10	all	0.995985	0.0574502	10	10
AXIN2	all	0.882882	-0.00627216	10	10	all	0.219859	-0.0134197	10	10	all	0.466719	-0.0150157	10	10	all	0.847237	0.0587357	10	10	all	0.605748	0.090046	10	10	all	0.589746	0.0557016	10	10	all	0.813476	-0.0310849	10	10	all	0.846125	0.066428	10	10	all	0.953971	0.000869037	10	10
AXL	all	0.0869076	0.0159565	10	10	all	0.269579	-0.019019	10	10	all	0.803406	0.00255274	10	10	all	0.216049	0.031419	10	10	all	0.154321	0.0752166	10	10	all	0.192985	0.0796105	10	10	all	0.0562519	0.0796979	10	10	all	0.455296	0.0319411	10	10	all	0.160553	0.0663738	10	10
AZGP1	all	0.715183	-0.0249521	10	10	all	0.886706	-0.0146409	10	10	all	0.259602	-0.00943373	10	10	all	0.331112	-0.0337556	10	10	all	0.161171	-0.113748	10	10	all	0.253185	-0.0943033	10	10	all	0.0814408	-0.0333629	10	10	all	0.186322	-0.0743657	9	9	all	0.058793	-0.0312736	9	9
AZI1	all	0.38854	-0.00375802	10	10	all	0.997476	-0.0033439	10	10	all	0.644825	-0.00455857	10	10	all	0.864805	0.0278592	10	10	all	0.169859	-0.023524	10	10	all	0.444726	-0.00492222	10	10	all	0.998603	0.0112119	10	10	all	0.210913	-0.055322	10	10	all	0.456582	0.00287241	10	10
AZI2	all	0.679079	-0.00228389	9	9	all	0.911944	0.0012777	9	9	all	0.795203	-0.00419375	9	9	all	0.8185	0.0505334	9	9	all	0.0602126	0.133341	9	9	all	0.130257	0.0906566	9	9	all	0.790753	0.0355519	9	9	all	0.0505321	0.0962458	9	9	all	0.128358	0.0693031	9	9
AZIN1	ENST00000347770.4	0.427801	-0.0111293	10	10	ENST00000337198.5	0.0277038	-0.0189161	10	10	ENST00000337198.5	0.0883962	-0.00789275	10	10	ENST00000337198.5	0.0154532	-0.112417	10	10	ENST00000337198.5	0.352523	-0.036865	10	10	ENST00000337198.5	0.071295	-0.0981727	10	10	ENST00000337198.5	0.0063454	-0.091504	10	10	ENST00000337198.5	0.198736	-0.111549	10	10	ENST00000337198.5	0.0131361	-0.0808315	10	10
AZU1	all	0.0742538	0.0151813	9	9	all	0.215844	0.00270656	9	9	all	0.0356847	0.0103111	9	9	all	0.226188	-0.136959	9	9	all	0.754721	-0.0775355	9	9	all	0.46439	-0.126069	9	9	all	0.596723	-0.0594413	9	9	all	0.827457	-0.045481	9	9	all	0.766999	-0.0536334	9	9
B2M	all	0.37304	-0.00264073	10	10	all	0.413222	-0.0095716	10	10	all	0.110631	-0.00292581	10	10	all	0.291128	0.0674661	10	10	all	0.524267	0.0539131	10	10	all	0.269376	0.0367032	10	10	all	0.488075	0.0643945	10	10	all	0.691039	0.0180729	10	10	all	0.515132	0.0252468	10	10
B3GALNT2	all	0.207795	0.015009	10	10	all	0.381568	-0.00261861	10	10	all	0.998692	0.010551	10	10	all	0.784267	0.0351093	10	10	all	0.186939	0.0801556	10	10	all	0.386925	0.0784614	10	10	all	0.39466	0.0826939	10	10	all	0.237227	0.058439	10	10	all	0.262048	0.0668358	10	10
B3GALT1	ENST00000305861.1	0.0336409	-0.0295123	10	10	ENST00000305861.1	0.371991	0.00745724	10	10	ENST00000305861.1	0.503478	-0.011987	10	10	ENST00000305861.1	0.246141	0.142165	10	10	ENST00000305861.1	0.633257	-0.0422834	10	10	ENST00000392690.3	0.509482	0.0478192	10	10	ENST00000392690.3	0.565727	0.0276351	10	10	ENST00000305861.1	0.75726	-0.0173195	10	10	ENST00000392690.3	0.586973	0.029441	10	10
B3GALT4	all	0.615511	0.00572337	10	10	all	0.348796	-0.00705968	10	10	all	0.31447	-0.00328943	10	10	all	0.975603	0.0368856	10	10	all	0.588335	-0.00658236	10	10	all	0.830551	0.0293579	10	10	all	0.89194	0.033229	10	10	all	0.379482	0.0166616	10	10	all	0.60106	0.0239422	10	10
B3GALT5	ENST00000380618.1	0.0731786	0.0218475	9	9	ENST00000380618.1	0.457612	-0.00430463	9	9	ENST00000380618.1	0.237088	0.00229381	9	9	ENST00000380620.4	0.208388	0.00390978	6	6	ENST00000380620.4	0.0642752	-0.0977359	6	6	ENST00000380620.4	0.0740665	-0.0259625	6	6	ENST00000380620.4	0.195737	-0.00973801	6	6	ENST00000380620.4	0.0555917	-0.0722565	6	6	ENST00000380620.4	0.0628311	-0.0234497	6	6
B3GALT6	all	0.185244	0.00696981	10	10	all	0.495682	0.0125054	10	10	all	0.170405	0.0122782	10	10	all	0.576239	0.00440856	10	10	all	0.656454	0.0571962	10	10	all	0.839035	0.0574787	10	10	all	0.744265	0.0615637	10	10	all	0.375423	0.0400951	10	10	all	0.76011	0.0443139	10	10
B3GALTL	all	0.0132326	-0.0224277	10	10	all	0.227121	-0.023033	10	10	all	0.0223311	-0.0224455	10	10	all	0.889137	0.0239673	10	10	all	0.651152	0.0574914	10	10	all	0.83426	0.0402652	10	10	all	0.419457	-0.0872224	10	10	all	0.775234	0.0269757	10	10	all	0.756926	-0.0349302	10	10
B3GAT1	ENST00000392580.1,ENST00000312527.4	0.165967	-0.023162	10	10	ENST00000392580.1,ENST00000312527.4	0.0539497	-0.00920882	10	10	ENST00000392580.1,ENST00000312527.4	0.0290418	-0.0106444	10	10	ENST00000524765.1	0.592823	0.0326088	10	10	ENST00000392580.1,ENST00000312527.4	0.284972	-0.0180963	10	10	ENST00000524765.1	0.311204	0.0233629	10	10	ENST00000524765.1	0.381801	0.0208182	10	10	ENST00000392580.1,ENST00000312527.4	0.0439749	-0.0157218	10	10	ENST00000392580.1,ENST00000312527.4	0.113863	-0.00316894	10	10
B3GAT3	all	0.797299	-0.00913463	10	10	all	0.857963	0.00402249	10	10	all	0.912255	0.00362438	10	10	all	0.499715	0.0260177	10	10	all	0.790182	-0.0187747	10	10	all	0.93698	0.0314686	10	10	all	0.656033	0.0331452	10	10	all	0.915507	-0.00821558	10	10	all	0.994542	0.0346399	10	10
B3GNT1	all	0.807214	0.00626654	10	10	all	0.029871	0.0287371	10	10	all	0.117702	0.0200433	10	10	all	0.0827614	0.11919	10	10	all	0.00418676	0.142762	10	10	all	0.0114	0.122846	10	10	all	0.0384674	0.0936723	10	10	all	0.000324295	0.139386	10	10	all	0.00119491	0.116529	10	10
B3GNT2	ENST00000301998.4	0.020447	-0.0184866	10	10	ENST00000301998.4	0.657878	-0.00946727	10	10	ENST00000301998.4	0.0500703	-0.0158958	10	10	ENST00000301998.4	0.0164591	0.147356	10	10	ENST00000301998.4	0.342831	0.0354213	10	10	ENST00000301998.4	0.0802656	0.123656	10	10	ENST00000301998.4	0.0616108	0.0387557	10	10	ENST00000301998.4	0.466486	0.032599	10	10	ENST00000301998.4	0.140028	0.0313676	10	10
B3GNT3	all	0.931309	-0.0103602	10	10	all	0.706655	0.00186416	10	10	all	0.919163	0.0028925	10	10	all	0.733677	0.0734677	10	10	all	0.12369	0.147474	10	10	all	0.562327	0.098972	10	10	all	0.999594	-0.00238639	10	10	all	0.0750933	0.114307	10	10	all	0.334222	0.0540184	10	10
B3GNT4	ENST00000546192.1	0.102903	-0.00563818	10	10	ENST00000546192.1	0.891795	-0.0162538	10	10	ENST00000546192.1	0.255089	-0.0104889	10	10	ENST00000535274.1	0.0738824	-0.00354517	10	10	ENST00000546192.1	0.0614232	0.109337	10	10	ENST00000546192.1	0.0861863	0.0874956	10	10	ENST00000535274.1	0.0653141	-0.0942404	10	10	ENST00000546192.1	0.100144	0.0323108	10	10	ENST00000546192.1	0.121121	0.0167441	10	10
B3GNT5	ENST00000465010.1	0.267018	-0.00521685	5	5	ENST00000326505.3	0.591529	-0.00447372	10	10	ENST00000465010.1	0.568888	-0.00408558	5	5	ENST00000326505.3	0.612516	0.0261088	10	10	ENST00000460419.1	0.144246	-0.0227778	10	10	ENST00000460419.1	0.42397	-0.00231651	10	10	ENST00000326505.3	0.473314	0.0200895	10	10	ENST00000460419.1	0.181962	-0.0173051	10	10	ENST00000465010.1	0.39492	-0.0214178	5	5
B3GNT6	all	0.527442	0.00471142	10	10	all	0.505346	-0.00297856	10	10	all	0.780403	-0.0011499	10	10	all	0.223827	-0.11296	10	10	all	0.0725141	-0.016961	10	10	all	0.0734341	-0.0386861	10	10	all	0.23234	-0.085454	10	10	all	0.0707717	-0.0275598	10	10	all	0.0701691	-0.0316883	10	10
B3GNT7	all	0.304295	-0.018586	10	10	all	0.0707937	-0.00830202	10	10	all	0.0671821	-0.0170308	10	10	all	0.783529	0.0165844	10	10	all	0.475054	-0.0254471	10	10	all	0.602933	-0.0232634	10	10	all	0.380695	-0.024992	10	10	all	0.0999459	-0.0251378	10	10	all	0.199603	-0.0315093	10	10
B3GNT8	all	0.538388	0.00633711	10	10	all	0.910625	0.00299745	10	10	all	0.919881	0.00749614	10	10	all	0.487761	0.0208699	10	10	all	0.408944	0.0834655	10	10	all	0.428643	0.0338051	10	10	all	0.271175	0.0124518	10	10	all	0.322105	0.0238336	10	10	all	0.306269	0.0281123	10	10
B3GNT9	all	0.102594	-0.0065592	10	10	all	0.918512	-0.00375227	10	10	all	0.160376	-0.00269945	10	10	all	0.555168	0.027128	10	10	all	0.137266	0.109996	10	10	all	0.29229	0.0910425	10	10	all	0.844692	0.000759167	10	10	all	0.11695	0.0828659	10	10	all	0.436196	0.0669674	10	10
B3GNTL1	all	0.895334	-0.00754716	10	10	all	0.735453	-0.00263388	10	10	all	0.912434	-0.00561086	10	10	all	0.911197	0.0372002	10	10	all	0.5853	0.0503345	10	10	all	0.829315	0.100248	10	10	all	0.83079	0.0258958	10	10	all	0.537177	0.0293327	10	10	all	0.822461	0.079853	10	10
B4GALNT1	all	0.271077	-0.00976105	10	10	all	0.380217	-0.00892988	10	10	all	0.117702	-0.0057766	10	10	all	0.339733	0.0721165	10	10	all	0.0243403	0.148333	10	10	all	0.0790023	0.108551	10	10	all	0.720292	0.0204855	10	10	all	0.0292245	0.100622	10	10	all	0.156151	0.0718583	10	10
B4GALNT2	all	0.800789	0.00746853	10	10	all	0.240452	0.0118745	10	10	all	0.910282	0.0143883	10	10	all	0.296849	0.0145462	10	10	all	0.382997	-0.0704549	10	10	all	0.741898	-0.0190351	10	10	all	0.511765	0.0360874	10	10	all	0.573476	-0.0425272	10	10	all	0.620876	-0.00636669	10	10
B4GALNT3	all	0.898508	-0.000885952	10	10	all	0.83774	-0.0142356	10	10	all	0.925359	-0.00177571	10	10	all	0.0123942	0.0877596	10	10	all	0.943084	0.0256593	10	10	all	0.0967654	0.0273779	10	10	all	0.0200092	0.0848908	10	10	all	0.857636	-0.00392851	10	10	all	0.108188	0.0181523	10	10
B4GALNT4	all	0.0223329	-0.0103239	10	10	all	0.47045	0.00457595	10	10	all	0.159368	-0.00578762	10	10	all	0.507034	0.0982976	10	10	all	0.931169	-0.0202714	10	10	all	0.559657	0.0239682	10	10	all	0.564695	0.00348906	10	10	all	0.935467	0.023831	10	10	all	0.749542	-0.00257931	10	10
B4GALT1	all	0.441184	0.0192255	10	10	all	0.969312	0.00188579	10	10	all	0.53239	0.00268885	10	10	all	0.595053	-0.00971794	10	10	all	0.597876	-0.0347394	10	10	all	0.423838	-0.0112278	10	10	all	0.93544	-0.0152528	10	10	all	0.459809	-0.0258913	10	10	all	0.582544	-0.0151157	10	10
B4GALT2	ENST00000356836.6	0.520086	0.00133368	10	10	ENST00000356836.6	0.270978	-0.0115282	10	10	ENST00000356836.6	0.610816	-0.00137215	10	10	ENST00000356836.6	0.0476415	0.0892863	10	10	ENST00000356836.6	0.265916	0.0756412	10	10	ENST00000356836.6	0.0614312	0.070238	10	10	ENST00000356836.6	0.0383933	0.0854629	10	10	ENST00000372324.1	0.388953	-0.0930666	10	10	ENST00000356836.6	0.0722243	0.055666	10	10
B4GALT3	all	0.290212	-0.0129061	10	10	all	0.765576	-0.0316996	10	10	all	0.918266	-0.0232943	10	10	all	0.0183213	0.0119615	10	10	all	0.0328732	0.140255	10	10	all	0.0109626	0.0365869	10	10	all	0.0473842	0.00428945	10	10	all	0.0624373	0.0329023	10	10	all	0.0300903	0.0138101	10	10
B4GALT4	ENST00000359213.3,ENST00000393765.2	0.246482	-0.0155368	10	10	ENST00000359213.3,ENST00000393765.2	0.180374	-0.0232866	10	10	ENST00000359213.3,ENST00000393765.2	0.12179	-0.0168745	10	10	ENST00000359213.3,ENST00000393765.2	0.0543799	0.111323	10	10	ENST00000359213.3,ENST00000393765.2	0.316232	0.0526617	10	10	ENST00000359213.3,ENST00000393765.2	0.113298	0.0667604	10	10	ENST00000359213.3,ENST00000393765.2	0.133541	0.0859746	10	10	ENST00000483209.1	0.223684	-0.046157	8	8	ENST00000359213.3,ENST00000393765.2	0.198377	0.0264812	10	10
B4GALT5	all	0.565612	0.00676672	10	10	all	0.535143	0.00479826	10	10	all	0.89336	0.00405522	10	10	all	0.772216	-0.0282862	10	10	all	0.0261208	-0.100985	10	10	all	0.147984	-0.0734081	10	10	all	0.865835	-0.0411755	10	10	all	0.0576718	-0.0850537	10	10	all	0.220397	-0.0703918	10	10
B4GALT6	all	0.571204	0.0069963	10	10	all	0.57825	-0.0046413	10	10	all	0.771219	0.000154518	10	10	all	0.22271	0.11882	10	10	all	0.99761	0.109829	10	10	all	0.647734	0.121803	10	10	all	0.146756	0.106813	10	10	all	0.824611	0.0261317	10	10	all	0.511344	0.0973257	10	10
B4GALT7	all	0.444676	-0.0276397	10	10	all	0.566949	-0.0104824	10	10	all	0.422483	-0.0186587	10	10	all	0.342687	0.073421	10	10	all	0.0646194	0.16014	10	10	all	0.153028	0.134769	10	10	all	0.971927	0.00549365	10	10	all	0.0896529	0.109286	10	10	all	0.34717	0.0546781	10	10
B9D1	all	0.681406	-0.0111627	10	10	all	0.223426	-0.0273495	10	10	all	0.337978	-0.0168501	10	10	all	0.613667	-0.108613	10	10	all	0.910704	-0.043748	10	10	all	0.448716	-0.129171	10	10	all	0.29725	-0.0713913	10	10	all	0.49387	-0.0405794	10	10	all	0.243478	-0.0506402	10	10
B9D2	all	0.566912	0.00565032	10	10	all	0.992653	-0.0094205	10	10	all	0.638267	-0.00663901	10	10	all	0.518538	0.00566493	10	10	all	0.635472	0.0286564	10	10	all	0.931219	0.0168122	10	10	all	0.529437	0.032113	10	10	all	0.505782	0.0276957	10	10	all	0.940739	0.0299044	10	10
BAALC	all	0.672316	0.00420757	10	10	all	0.15533	0.0122963	10	10	all	0.30933	0.00825192	10	10	all	0.521472	-0.104099	10	10	all	0.524856	-0.0905346	10	10	all	0.54077	-0.119924	10	10	all	0.748885	-0.0699071	10	10	all	0.73112	-0.0820671	10	10	all	0.789551	-0.0835456	10	10
BAAT	ENST00000395051.3	0.129794	-0.0180183	10	10	ENST00000395051.3	0.306859	0.0185666	10	10	ENST00000395051.3	0.721058	-0.00284313	10	10	ENST00000259407.2	0.45077	0.0380435	10	10	ENST00000259407.2	0.356519	0.0159049	10	10	ENST00000259407.2	0.332598	0.0323993	10	10	ENST00000395051.3	0.44535	-0.0103243	10	10	ENST00000259407.2	0.262374	0.0501095	10	10	ENST00000259407.2	0.315609	0.0265534	10	10
BABAM1	all	0.252801	-0.0114217	10	10	all	0.67146	-0.00119848	10	10	all	0.685236	-0.00857081	10	10	all	0.837862	0.0484006	10	10	all	0.378757	-0.0192653	10	10	all	0.935899	0.0163984	10	10	all	0.900162	-0.02677	10	10	all	0.605763	-0.0315867	10	10	all	0.899274	-0.030585	10	10
BACE1	all	0.258684	-0.0283192	10	10	all	0.418694	-0.000336519	10	10	all	0.983535	-0.0156392	10	10	all	0.756048	-0.0277242	10	10	all	0.0517482	-0.0957542	10	10	all	0.180299	-0.0729289	10	10	all	0.230292	-0.060479	10	10	all	0.160549	-0.0660108	10	10	all	0.103815	-0.0656	10	10
BACE2	all	0.207001	-0.0331179	10	10	all	0.643032	-0.0190061	10	10	all	0.297693	-0.0272891	10	10	all	0.06055	-0.097236	10	10	all	0.0507432	-0.152947	10	10	all	0.0363967	-0.122853	10	10	all	0.00591558	-0.110826	10	10	all	0.01098	-0.13085	10	10	all	0.00349777	-0.110574	10	10
BACH1	ENST00000399921.1	0.121891	0.0208142	10	10	ENST00000399921.1	0.0457078	0.0153246	10	10	ENST00000399921.1	0.0278716	0.0169575	10	10	ENST00000286800.3	0.0391478	-0.101911	10	10	ENST00000286800.3	0.362387	0.00390212	10	10	ENST00000286800.3	0.0929823	-0.0146815	10	10	ENST00000286800.3	0.13077	-0.07892	10	10	ENST00000286800.3	0.212732	0.00529993	10	10	ENST00000286800.3	0.0913409	-0.00966003	10	10
BACH2	all	0.617499	-0.00366622	10	10	all	0.625683	0.0092003	10	10	all	0.819014	0.00442046	10	10	all	0.784789	0.053474	10	10	all	0.634908	0.019415	10	10	all	0.896205	0.0322199	10	10	all	0.868101	0.0275357	10	10	all	0.689791	0.0282786	10	10	all	0.772799	0.0225352	10	10
BAD	all	0.879806	0.00426083	10	10	all	0.0370261	0.0199612	10	10	all	0.138957	0.00712806	10	10	all	0.701069	0.0152282	10	10	all	0.0176162	-0.0714829	10	10	all	0.11796	-0.0356584	10	10	all	0.631291	-0.0260877	10	10	all	0.183613	-0.0238783	10	10	all	0.246046	-0.0177772	10	10
BAG1	all	0.202624	0.00174399	10	10	all	0.445808	-0.00443677	10	10	all	0.211208	-0.00235643	10	10	all	0.63378	0.027647	10	10	all	0.654861	-0.00920166	10	10	all	0.962758	0.0278254	10	10	all	0.898016	0.021523	10	10	all	0.540459	-0.0206177	10	10	all	0.897485	-0.021443	10	10
BAG2	all	0.760173	0.00332826	10	10	all	0.431714	0.00822454	10	10	all	0.912255	0.00712125	10	10	all	0.0116138	0.0856605	10	10	all	0.22967	0.107499	10	10	all	0.0316652	0.0874231	10	10	all	0.0179267	0.0752136	10	10	all	0.0692964	0.0778514	10	10	all	0.0184156	0.0697373	10	10
BAG3	all	0.402042	-0.0223423	10	10	all	0.152039	-0.0224131	10	10	all	0.0769607	-0.0174807	10	10	all	0.109283	0.0702933	10	10	all	0.499967	-0.0760855	10	10	all	0.411354	0.021665	10	10	all	0.245792	0.05756	10	10	all	0.286028	-0.0921231	10	10	all	0.931477	-0.013822	10	10
BAG4	all	0.0902159	-0.0266021	10	10	all	0.855701	-0.0214284	10	10	all	0.0465902	-0.0182826	10	10	all	0.2817	0.149499	10	10	all	0.564949	0.175182	10	10	all	0.806974	0.161528	10	10	all	0.394942	0.0760938	10	10	all	0.825006	0.0908907	10	10	all	0.776089	0.0834923	10	10
BAG5	ENST00000445922.2	0.0323003	-0.0462647	10	10	ENST00000445922.2	0.307153	-0.0268056	10	10	ENST00000445922.2	0.0740421	-0.0408995	10	10	ENST00000445922.2	0.191684	-0.0352461	10	10	ENST00000299204.4	0.730359	0.0194354	10	10	ENST00000299204.4	0.561487	-0.0231704	10	10	ENST00000445922.2	0.0127991	-0.114372	10	10	ENST00000299204.4	0.447662	0.0186918	10	10	ENST00000445922.2	0.243706	-0.128495	10	10
BAG6	ENST00000211379.5,ENST00000375964.6	0.306901	-0.0131934	8	8	ENST00000211379.5,ENST00000375964.6	0.0040139	0.0204331	8	8	ENST00000211379.5,ENST00000375964.6	0.114562	0.00892276	8	8	all	0.104562	0.0751356	2	2	ENST00000375976.4	0.313631	0.0747062	8	8	ENST00000375976.4	0.12473	0.0204247	8	8	ENST00000375976.4	0.0806231	0.0124513	8	8	ENST00000211379.5,ENST00000375964.6	0.126283	0.0727195	8	8	ENST00000375976.4	0.119173	0.0147906	8	8
BAGE	all	0.887565	0.00484481	10	10	all	0.549406	-0.0150291	10	10	all	0.534918	-0.00735944	10	10	all	0.969113	-0.0106097	10	10	all	0.070549	0.0711072	10	10	all	0.231093	0.0358426	10	10	all	0.939619	0.0153512	10	10	all	0.167998	0.0583263	10	10	all	0.340542	0.011751	10	10
BAGE2	all	0.622201	0.0120629	10	10	all	0.556664	-0.0150291	10	10	all	0.789704	-0.0014954	10	10	all	0.662429	0.0178353	10	10	all	0.292215	0.0270456	10	10	all	0.34137	0.0353765	10	10	all	0.539694	0.0212526	10	10	all	0.475939	0.0430578	10	10	all	0.367424	0.0114713	10	10
BAGE3	all	0.622201	0.0120629	10	10	all	0.556664	-0.0150291	10	10	all	0.789704	-0.0014954	10	10	all	0.662429	0.0178353	10	10	all	0.292215	0.0270456	10	10	all	0.34137	0.0353765	10	10	all	0.539694	0.0212526	10	10	all	0.475939	0.0430578	10	10	all	0.367424	0.0114713	10	10
BAGE4	all	0.622201	0.0120629	10	10	all	0.556664	-0.0150291	10	10	all	0.789704	-0.0014954	10	10	all	0.662429	0.0178353	10	10	all	0.292215	0.0270456	10	10	all	0.34137	0.0353765	10	10	all	0.539694	0.0212526	10	10	all	0.475939	0.0430578	10	10	all	0.367424	0.0114713	10	10
BAGE5	all	0.622201	0.0120629	10	10	all	0.556664	-0.0150291	10	10	all	0.789704	-0.0014954	10	10	all	0.662429	0.0178353	10	10	all	0.292215	0.0270456	10	10	all	0.34137	0.0353765	10	10	all	0.539694	0.0212526	10	10	all	0.475939	0.0430578	10	10	all	0.367424	0.0114713	10	10
BAHCC1	all	0.0623531	0.0216229	10	10	all	0.13148	0.0122637	10	10	all	0.0158499	0.0146672	10	10	all	0.417821	-0.0559903	10	10	all	0.392689	-0.0445349	10	10	all	0.390101	-0.0454082	10	10	all	0.86206	-0.0172796	10	10	all	0.93201	-0.0303224	10	10	all	0.90008	-0.0279198	10	10
BAHD1	ENST00000560846.1	0.194706	0.0157961	6	6	ENST00000416165.1	0.0389735	0.0273249	9	9	ENST00000416165.1	0.0317182	0.0146073	9	9	ENST00000416165.1	0.0519091	-0.156558	9	9	ENST00000416165.1	0.025259	-0.158671	9	9	ENST00000416165.1	0.0136945	-0.146621	9	9	ENST00000416165.1	0.0709639	-0.128415	9	9	ENST00000416165.1	0.097052	-0.0918445	9	9	ENST00000416165.1	0.0333572	-0.0661258	9	9
BAI1	ENST00000323289.5	0.861616	-0.00156516	10	10	ENST00000517894.1	0.323653	-0.022325	10	10	ENST00000517894.1	0.535364	-0.00966767	10	10	ENST00000323289.5	0.193886	0.0270857	10	10	ENST00000517894.1	0.928743	-0.028421	10	10	ENST00000323289.5	0.51846	0.0228849	10	10	ENST00000323289.5	0.227582	0.0308258	10	10	ENST00000517894.1	0.362306	-0.0307467	10	10	ENST00000517894.1	0.394835	-0.0558237	10	10
BAI2	ENST00000527361.1	0.642054	0.00615787	10	10	ENST00000257070.4	0.173205	0.0210761	10	10	ENST00000257070.4	0.172637	0.0088524	10	10	ENST00000527361.1	0.21826	0.0311005	10	10	ENST00000257070.4	0.449345	0.035134	10	10	ENST00000527361.1	0.428379	0.0438892	10	10	ENST00000527361.1	0.203385	0.065948	10	10	ENST00000257070.4	0.121691	0.0701995	10	10	ENST00000257070.4	0.216842	0.0642092	10	10
BAI3	all	0.449165	0.00301033	10	10	all	0.396811	0.0111197	10	10	all	0.269527	0.00316614	10	10	all	0.731805	-0.00562677	10	10	all	0.515394	0.0245015	10	10	all	0.68393	0.0419091	10	10	all	0.68323	0.0818458	10	10	all	0.433773	0.0386548	10	10	all	0.567051	0.0729404	10	10
BAIAP2	all	0.845222	-0.00869459	10	10	all	0.119152	0.00577211	10	10	all	0.483921	-0.0160243	10	10	all	0.493451	-0.0790424	10	10	all	0.744429	-0.010959	10	10	all	0.653767	0.00168783	10	10	all	0.370348	-0.068383	10	10	all	0.780083	-0.0140573	10	10	all	0.416929	-0.058923	10	10
BAIAP2L1	all	0.847036	0.00942182	10	10	all	0.0327871	-0.0180491	10	10	all	0.16928	-0.00396914	10	10	all	0.114418	0.126968	10	10	all	0.0357542	0.131101	10	10	all	0.0490084	0.12509	10	10	all	0.0678182	0.0659599	10	10	all	0.190366	0.0643414	10	10	all	0.0781504	0.0995552	10	10
BAIAP2L2	all	0.18075	-0.0740808	10	10	all	0.718701	-0.0384985	10	10	all	0.598978	-0.0648447	10	10	all	0.0579708	0.0564144	9	9	all	0.154255	0.217305	10	10	all	0.0850213	0.130234	9	9	all	0.479961	0.0219358	10	10	all	0.175685	0.0962739	10	10	all	0.297638	0.03169	10	10
BAIAP3	all	0.0172566	0.0253343	10	10	all	0.031556	-0.0233018	10	10	all	0.754237	0.00208731	10	10	all	0.149649	-0.10726	10	10	all	0.00928155	-0.1098	10	10	all	0.0201767	-0.099693	10	10	all	0.739996	-0.0322804	10	10	all	0.00302791	-0.124843	10	10	all	0.0336975	-0.0903068	10	10
BAK1	all	0.586037	-0.00323576	10	10	all	0.582893	-0.00293807	10	10	all	0.964599	-0.00516872	10	10	all	0.0675264	0.140267	10	10	all	0.865294	0.038869	10	10	all	0.311961	0.0484114	10	10	all	0.0515844	0.117204	10	10	all	0.777441	0.0315816	10	10	all	0.369772	0.0424054	10	10
BAMBI	all	0.757679	0.00885755	10	10	all	0.284354	0.0135541	10	10	all	0.438217	0.00413008	10	10	all	0.433285	-0.0454613	10	10	all	0.912676	-0.0402927	10	10	all	0.710387	-0.0508251	10	10	all	0.354072	-0.0320068	10	10	all	0.628824	-0.032506	10	10	all	0.879886	-0.0359655	10	10
BANF1	ENST00000312175.2,ENST00000445560.2	0.105638	0.0198254	10	10	ENST00000312175.2,ENST00000445560.2	0.107959	-0.0065353	10	10	ENST00000312175.2,ENST00000445560.2	0.622437	0.00225922	10	10	ENST00000312175.2,ENST00000445560.2	0.797548	-0.116488	10	10	ENST00000312175.2,ENST00000445560.2	0.125465	-0.0869023	10	10	ENST00000312175.2,ENST00000445560.2	0.550325	-0.087784	10	10	ENST00000533166.1,ENST00000527348.1	0.410149	0.0309565	10	10	ENST00000312175.2,ENST00000445560.2	0.0513155	-0.0868787	10	10	ENST00000312175.2,ENST00000445560.2	0.723288	-0.0762212	10	10
BANF2	all	0.754029	-0.00192217	10	10	all	0.124379	-0.00957837	10	10	all	0.284567	-0.00420216	10	10	all	0.364117	-0.053376	10	10	all	0.576162	0.0185064	10	10	all	0.744295	0.00528394	10	10	all	0.311585	-0.00433627	10	10	all	0.855243	0.0110292	10	10	all	0.503955	-0.0276436	10	10
BANP	all	0.0425793	-0.0144818	10	10	all	0.284151	0.0112482	10	10	all	0.691396	-0.00875258	10	10	all	0.952445	0.0396835	10	10	all	0.212627	-0.093298	10	10	all	0.501739	-0.0261125	10	10	all	0.509587	-0.0170661	10	10	all	0.506901	-0.0401705	10	10	all	0.40803	-0.0256123	10	10
BAP1	all	0.247404	-0.0294308	10	10	all	0.181331	-0.0162522	10	10	all	0.026166	-0.0222075	10	10	all	0.198305	0.304851	10	10	all	0.00628164	0.222422	10	10	all	0.0273442	0.263636	10	10	all	0.29127	0.217944	10	10	all	0.028562	0.161742	10	10	all	0.100658	0.189843	10	10
BARD1	all	0.00134219	-0.0823692	10	10	all	5.20659e-06	-0.0803781	10	10	all	0.000259717	-0.0813737	10	10	all	0.120902	0.0353092	10	10	all	0.0369041	0.110167	10	10	all	0.023528	0.0866111	10	10	all	0.0252726	-0.121855	10	10	all	0.0868713	-0.105677	10	10	all	0.00972558	-0.0911576	10	10
BARHL1	ENST00000263610.2	0.14641	-0.00969134	10	10	ENST00000542090.1	0.616468	-0.044516	10	10	ENST00000263610.2	0.219797	-0.0102431	10	10	ENST00000542090.1	0.457792	0.0325695	10	10	ENST00000542090.1	0.338705	-0.0614429	10	10	ENST00000542090.1	0.255638	0.00038494	10	10	ENST00000542090.1	0.692168	-0.00619628	10	10	ENST00000263610.2	0.3295	-0.0506006	10	10	ENST00000542090.1	0.377668	-0.0507623	10	10
BARHL2	all	0.128256	0.00779052	10	10	all	0.230134	-0.0118495	10	10	all	0.807695	0.00266609	10	10	all	0.0767952	0.107944	10	10	all	0.149617	0.0869087	10	10	all	0.0509391	0.0884055	10	10	all	0.0194939	0.10013	10	10	all	0.322298	0.0676979	10	10	all	0.0439741	0.0741691	10	10
BARX1	all	0.864591	-0.0289738	10	10	all	0.269604	-0.0257337	10	10	all	0.354418	-0.0241374	10	10	all	0.827144	0.0499803	10	10	all	0.224086	-0.0308884	10	10	all	0.632271	-0.00534601	10	10	all	0.972468	-0.0277874	10	10	all	0.437597	-0.0791346	10	10	all	0.736973	-0.053461	10	10
BARX2	all	0.348439	0.00471909	10	10	all	0.0816566	0.0165384	10	10	all	0.0838658	0.0127197	10	10	all	0.253468	0.0620292	10	10	all	0.615892	0.032899	10	10	all	0.287647	0.00479009	10	10	all	0.172129	0.0675896	10	10	all	0.197889	0.0663693	10	10	all	0.10951	0.0544766	10	10
BASP1	all	0.905485	-0.00155442	10	10	all	0.481744	0.00280992	10	10	all	0.802182	0.00331992	10	10	all	0.237277	-0.0753909	10	10	all	0.457073	-0.0419176	10	10	all	0.278309	-0.0780653	10	10	all	0.293185	-0.081381	10	10	all	0.563559	-0.027454	10	10	all	0.354761	-0.0271308	10	10
BATF	all	0.881277	-0.00980203	10	10	all	0.504155	0.00574838	10	10	all	0.575157	-0.00721745	10	10	all	0.155304	0.0237427	10	10	all	0.880389	0.00803362	10	10	all	0.311095	0.00995115	10	10	all	0.183451	0.0187498	10	10	all	0.651724	0.0167177	10	10	all	0.305574	0.0177337	10	10
BATF2	all	0.329496	0.00577192	10	10	all	0.604236	-0.00389311	10	10	all	0.243795	0.00216228	10	10	all	0.590362	-0.0434711	10	10	all	0.329147	-0.0310652	10	10	all	0.362507	-0.012985	10	10	all	0.542237	-0.0119594	10	10	all	0.421669	-0.0723745	10	10	all	0.427387	-0.0408019	10	10
BATF3	all	0.244714	0.00535246	10	10	all	0.602228	-0.00110846	10	10	all	0.813569	0.00615421	10	10	all	0.650419	-0.0171246	10	10	all	0.32814	-0.126564	10	10	all	0.34137	-0.0456719	10	10	all	0.975576	0.0156825	10	10	all	0.267822	-0.0523601	10	10	all	0.406175	-0.0283878	10	10
BAX	all	0.136908	0.0182994	10	10	all	0.986433	-0.00222932	10	10	all	0.191631	0.00372296	10	10	all	0.885966	-0.0264956	10	10	all	0.9738	-0.0245382	10	10	all	0.817598	-0.00475401	10	10	all	0.619848	0.0199798	10	10	all	0.954793	-0.0192663	10	10	all	0.532581	0.00416443	10	10
BAZ1A	ENST00000382422.2	0.127704	0.0207513	10	10	ENST00000382422.2	0.13862	0.0168862	10	10	ENST00000382422.2	0.0575821	0.0165601	10	10	ENST00000382422.2	0.111745	-0.0763445	10	10	ENST00000360310.1	0.161238	-0.0621911	10	10	ENST00000382422.2	0.0776218	-0.0304995	10	10	ENST00000382422.2	0.315082	-0.0444235	10	10	ENST00000360310.1	0.142598	-0.00884297	10	10	ENST00000382422.2	0.247939	-0.00823973	10	10
BAZ1B	all	0.554734	-0.0240109	10	10	all	0.442915	-0.0310378	10	10	all	0.575852	-0.0287095	10	10	all	0.0688947	0.192639	10	10	all	0.142007	0.151199	10	10	all	0.0940668	0.171919	10	10	all	0.0524787	0.11081	10	10	all	0.274361	0.0312383	10	10	all	0.0726196	0.0764369	10	10
BAZ2A	ENST00000549884.1	0.0628307	0.0179449	10	10	ENST00000549884.1	0.0519545	0.0166798	10	10	ENST00000549884.1	0.00672422	0.013877	10	10	ENST00000549884.1	0.00454833	-0.130749	10	10	ENST00000549884.1	0.00668866	-0.150067	10	10	ENST00000549884.1	0.00230584	-0.126947	10	10	ENST00000549884.1	0.0220035	-0.089471	10	10	ENST00000549884.1	0.0168726	-0.100305	10	10	ENST00000549884.1	0.00881251	-0.0875215	10	10
BAZ2B	all	0.917905	-0.0325819	9	9	all	0.284477	-0.030076	9	9	all	0.539488	-0.0335203	9	9	all	0.677377	0.162576	9	9	all	0.169872	0.132185	9	9	all	0.255995	0.131994	9	9	all	0.867023	0.0652723	9	9	all	0.143821	0.0454273	9	9	all	0.301879	0.0444924	9	9
BBC3	all	0.869302	0.00364716	10	10	all	0.474803	-0.0104471	10	10	all	0.77598	-0.00157003	10	10	all	0.849451	0.0308225	10	10	all	0.379983	-0.0102715	10	10	all	0.416269	0.0192653	10	10	all	0.788242	-0.012418	10	10	all	0.483836	-0.0284357	10	10	all	0.700537	0.0244994	10	10
BBIP1	all	0.806426	-0.00389007	10	10	all	0.0602605	0.010055	10	10	all	0.12554	0.00479885	10	10	all	0.925958	-0.021172	10	10	all	0.38488	-0.0345656	10	10	all	0.629455	-0.0328902	10	10	all	0.926864	-0.00307697	10	10	all	0.707806	-0.000673163	10	10	all	0.850809	0.0261437	10	10
BBOX1	ENST00000263182.3	0.171439	-0.00870817	2	2	ENST00000525090.1	0.0657425	-0.0149751	7	7	ENST00000525090.1	0.0356919	-0.0118833	7	7	ENST00000528583.1	0.0158311	0.119583	7	7	ENST00000528583.1	0.277788	0.0162694	7	7	ENST00000528583.1	0.0487629	0.0420108	7	7	ENST00000528583.1	0.0110548	0.108024	7	7	ENST00000528583.1	0.207462	0.0231059	7	7	ENST00000528583.1	0.0331264	0.0863606	7	7
BBS1	all	0.11605	-0.00684876	10	10	all	0.229258	-0.0383116	10	10	all	0.0750355	-0.0246715	10	10	all	0.883824	-0.0797964	10	10	all	0.144775	0.163025	10	10	all	0.438011	0.0775859	10	10	all	0.861172	-0.139484	10	10	all	0.259596	0.0494109	10	10	all	0.885597	0.0129767	10	10
BBS10	all	0.0602021	0.0148625	10	10	all	0.741933	0.00762155	10	10	all	0.0810892	0.00436717	10	10	all	0.489038	-0.0205119	10	10	all	0.899106	0.0235844	10	10	all	0.764332	-0.0173823	10	10	all	0.879717	-0.0153882	10	10	all	0.704743	0.0215977	10	10	all	0.805175	-0.00786777	10	10
BBS12	all	0.00331259	0.0201876	10	10	all	0.355168	-0.0117012	10	10	all	0.266304	0.006975	10	10	all	0.0197224	-0.0238981	10	10	all	0.945784	0.0402863	10	10	all	0.151021	-0.0122069	10	10	all	0.370318	-0.0163219	10	10	all	0.616372	-0.0157015	10	10	all	0.408928	-0.0116298	10	10
BBS2	all	0.733947	-0.0114101	10	10	all	0.160771	-0.0130202	10	10	all	0.221117	-0.008529	10	10	all	0.943039	-0.0142899	10	10	all	0.703333	-0.0268138	10	10	all	0.701387	0.0364298	10	10	all	0.867968	-0.0098909	10	10	all	0.423432	-0.0546355	10	10	all	0.613074	-0.0300172	10	10
BBS4	all	0.187238	0.00484824	10	10	all	0.952205	-0.00620626	10	10	all	0.339577	0.00124063	10	10	all	0.377839	0.107707	10	10	all	0.279106	0.102751	10	10	all	0.289962	0.105229	10	10	all	0.113323	0.0809728	10	10	all	0.253184	0.0863379	10	10	all	0.142997	0.0771934	10	10
BBS5	all	0.955809	-0.00982611	10	10	all	0.665209	-0.0134001	10	10	all	0.418505	-0.00213273	10	10	all	0.325574	-0.0391635	10	10	all	0.913349	0.00138494	10	10	all	0.656873	-0.0248554	10	10	all	0.223645	-0.0249613	10	10	all	0.805936	-0.00805569	10	10	all	0.492622	-0.0178077	10	10
[truncated: 30,684 more rows]
