# Supplementary material for: Identification of a transporter complex responsible for the cytosolic entry of nitrogen-containing bisphosphonates
Source: eLife journal article supplement (doi:10.7554/elife.36620), 2018-05-10
Supplement: supp [file elife-36620-supp-v1.zip › elife_poa_e36620_Supplementary_File_2.xlsx]

## Sheet: zolendronate - CRISPRi - K562
gene	transcripts	gamma rep1 Mann-Whitney p-value	gamma rep1 average phenotype of strongest 3	gamma rep1 sgRNA count_MW	gamma rep1 sgRNA count_avg	gamma rep1 transcripts	gamma rep2 Mann-Whitney p-value	gamma rep2 average phenotype of strongest 3	gamma rep2 sgRNA count_MW	gamma rep2 sgRNA count_avg	gamma rep2 transcripts	gamma avg3 Mann-Whitney p-value	gamma avg3 average phenotype of strongest 3	gamma avg3 sgRNA count_MW	gamma avg3 sgRNA count_avg	gamma avg3 transcripts	rho rep1 Mann-Whitney p-value	rho rep1 average phenotype of strongest 3	rho rep1 sgRNA count_MW	rho rep1 sgRNA count_avg	rho rep1 transcripts	rho rep2 Mann-Whitney p-value	rho rep2 average phenotype of strongest 3	rho rep2 sgRNA count_MW	rho rep2 sgRNA count_avg	rho rep2 transcripts	rho avg3 Mann-Whitney p-value	rho avg3 average phenotype of strongest 3	rho avg3 sgRNA count_MW	rho avg3 sgRNA count_avg	rho avg3 transcripts	tau rep1 Mann-Whitney p-value	tau rep1 average phenotype of strongest 3	tau rep1 sgRNA count_MW	tau rep1 sgRNA count_avg	tau rep1 transcripts	tau rep2 Mann-Whitney p-value	tau rep2 average phenotype of strongest 3	tau rep2 sgRNA count_MW	tau rep2 sgRNA count_avg	tau rep2 transcripts	tau avg3 Mann-Whitney p-value	tau avg3 average phenotype of strongest 3	tau avg3 sgRNA count_MW	tau avg3 sgRNA count_avg
ACAT2	P1P2	0.342329	-0.101734	6	6	P1P2	0.0202948	0.115087	5	5	P1P2	0.0743754	0.0659839	3	3	P1P2	0.00137064	0.378474	7	7	P1P2	3.38583e-05	0.368239	8	8	P1P2	6.42451e-05	0.360173	7	7	P1P2	0.0020466	2.25756	7	7	P1P2	0.000479227	3.57042	5	5	P1P2	0.000597526	2.80036	4	4
SLC37A3	P1P2	0.0858639	-0.143306	4	4	P1P2	0.618586	-0.034294	1	1						P1P2	0.00188253	0.370135	7	7	P1P2	0.00195938	0.428027	5	5	P1P2	0.00474114	0.344048	4	4	P1P2	0.000588801	1.93401	5	5	P1P2	0.0837293	3.61922	1	1
FDFT1	P2	0.0126607	0.150883	7	7	P1	0.140552	-0.0858428	2	2	P2	0.053651	0.0974628	4	4	P1	1.89534e-05	0.281271	7	7	P1	0.000128178	0.43188	5	5	P1	0.000548315	0.327662	4	4	P1	0.000400313	2.54673	7	7	P1	0.00288538	2.74333	3	3	P1	0.0260209	2.07819	2	2
PMVK	P1P2	0.165249	-0.122232	1	1	P1P2	0.815768	0.015039	1	1						P1P2	0.0160665	0.273294	2	2	P1P2	0.000138933	0.377804	5	5	P1P2	0.0144731	0.314713	2	2	P1P2	0.00110185	1.9985	6	6	P1P2	0.0574178	2.70876	4	4	P1P2	0.086939	1.97001	1	1
BTAF1	P1P2	0.0145718	-0.138472	3	3	P1P2	0.040651	-0.170694	2	2	P1P2	0.0948556	-0.153903	1	1	P1P2	0.00568357	0.229342	5	5	P1P2	0.00702358	0.210454	3	3	P1P2	0.0837933	0.300373	1	1	P1P2	0.126924	1.02514	6	6	P1P2	0.893659	-0.0179444	2	2	P1P2	0.137646	1.13884	1	1
FASN	P1P2	0.533597	0.0564567	5	5	P1P2	0.297076	-0.164976	7	7	P1P2	0.928502	0.00615535	4	4	P1P2	0.0150336	0.279236	6	6	P1P2	0.000529706	0.398896	7	7	P1P2	0.0031416	0.299137	5	5	P1P2	0.00315737	2.94203	8	8	P1P2	0.000140562	2.77024	8	8	P1P2	0.000667961	2.6739	7	7
MMAB	P1P2	0.745551	0.0195027	7	7	P1P2	0.159206	-0.0234814	8	8	P1P2	0.284744	-0.033138	6	6	P1P2	0.00363446	0.224205	8	8	P1P2	3.1719e-05	0.420062	9	9	P1P2	9.68543e-05	0.285253	7	7	P1P2	0.0352696	1.72245	9	9	P1P2	7.80002e-05	2.8464	9	9	P1P2	0.000450467	2.1082	8	8
THAP11	P1P2	0.0528006	-0.140844	7	7	P1P2	0.448969	-0.0422842	3	3	P1P2	0.0514571	-0.0652734	3	3	P1P2	0.00285545	0.252594	7	7	P1P2	0.0554471	0.279046	7	7	P1P2	0.00024098	0.26582	6	6	P1P2	0.0566426	0.349602	7	7	P1P2	0.0309732	1.80427	4	4	P1P2	0.144638	1.07693	4	4
GNG12	P1P2	0.691981	-0.0260662	2	2	P1P2	0.0378391	-0.170388	2	2	P1P2	0.0920181	-0.167454	1	1	P1P2	0.122052	0.166553	1	1	P1P2	0.75113	0.0826958	4	4	P1P2	0.0837933	0.264355	1	1	P1P2	0.898977	-0.048521	4	4	P1P2	0.221181	1.04663	1	1	P1P2	0.249322	0.706868	1	1
LRRC4B	P1P2	0.822004	-0.0178863	1	1											P1P2	0.470282	0.0440996	3	3	P1P2	0.539317	0.130314	2	2	P1P2	0.0837933	0.247836	1	1	P1P2	0.44549	0.450083	2	2	P1P2	0.143364	-1.79341	1	1
pseudo_13578	pseudo_transcript_1	0.00660959	0.198442	7	7	pseudo_transcript_0	0.053289	-0.15426	5	5	pseudo_transcript_1	0.0968731	0.0875072	5	5	pseudo_transcript_0	0.0724208	0.127033	2	2	pseudo_transcript_1	0.211767	-0.0929052	9	9	pseudo_transcript_0	0.0840588	0.24642	1	1	pseudo_transcript_1	0.165397	1.54055	7	7	pseudo_transcript_1	0.0467896	-1.51892	6	6	pseudo_transcript_1	0.494412	0.316355	4	4
pseudo_18277	pseudo_transcript_0	0.108793	-0.174118	1	1	pseudo_transcript_0	0.0498413	-0.100577	3	3	pseudo_transcript_0	0.0996156	-0.142409	1	1	pseudo_transcript_0	0.115445	0.176126	1	1	pseudo_transcript_0	0.379281	0.0925492	4	4	pseudo_transcript_0	0.0840588	0.24642	1	1	pseudo_transcript_0	0.343727	0.92956	2	2	pseudo_transcript_0	0.358506	0.785192	2	2	pseudo_transcript_0	0.197786	0.8358	1	1
STEAP3	P1P2	0.371447	-0.0525865	5	5	P1P2	0.328471	0.0442117	4	4	P1P2	0.237541	0.0452273	3	3	P1P2	0.000238177	0.259229	7	7	P1P2	3.6766e-05	0.259703	7	7	P1P2	6.9414e-05	0.242802	6	6	P1P2	0.000454053	2.03903	6	6	P1P2	0.0101652	3.39729	5	5	P1P2	0.000889255	2.6535	4	4
BAAT	P2	0.790311	-0.0855438	5	5	P1	0.166359	0.0961109	4	4	P2	0.0789855	-0.0924577	2	2	P1	0.0578943	0.153211	8	8	P2	0.0966133	0.121959	3	3	P2	0.084325	0.235869	1	1	P1	0.0489492	1.04099	4	4	P2	0.282264	0.523686	3	3	P2	0.115876	0.675309	2	2
POLR2B	P1P2	0.100907	-0.186083	1	1	P1P2	0.158852	-0.141647	1	1	P1P2	0.0934282	-0.163865	1	1	P1P2	0.0842326	0.332003	1	1	P1P2	0.547081	0.0388405	3	3	P1P2	0.084325	0.229384	1	1	P1P2	0.97339	-0.0656736	4	4	P1P2	0.608654	-0.371581	4	4	P1P2	0.887162	0.0713516	2	2
KRIT1	P1P2	0.0839758	-0.334088	1	1	P1P2	0.440447	0.0352556	2	2	P1P2	0.0948556	-0.154999	1	1	P1P2	0.124878	0.148417	3	3	P1P2	0.223765	0.0985529	3	3	P1P2	0.084325	0.228554	1	1	P1P2	0.509158	-0.180167	3	3	P1P2	0.212193	0.858318	3	3	P1P2	0.310544	0.581055	1	1
MRPL37	P1P2	0.800563	0.0179259	2	2	P1P2	0.910131	-0.0581612	3	3	P1P2	0.139442	-0.102071	1	1	P1P2	0.646119	0.0242994	2	2	P1P2	0.265688	0.217496	2	2	P1P2	0.084325	0.227968	1	1	P1P2	0.48986	-0.288228	4	4	P1P2	0.171669	1.23278	1	1	P1P2	0.151019	1.0316	1	1
NLRP7	P2	0.54797	0.0275685	3	3	P2	0.262976	0.0730207	4	4	P2	0.144588	0.0730591	2	2	P1	0.0956192	0.126145	5	5	P2	0.396326	0.0647623	4	4	P1	0.084325	0.22636	1	1	P2	0.256078	-0.595806	3	3	P2	0.341865	0.37401	5	5	P1	0.705996	-0.192046	1	1
pseudo_14773						pseudo_transcript_0	0.95651	-0.00860371	3	3						pseudo_transcript_0	0.134961	0.147881	2	2	pseudo_transcript_0	0.964597	-0.0291557	3	3	pseudo_transcript_0	0.0845918	0.224911	1	1	pseudo_transcript_0	0.23465	-0.784034	2	2	pseudo_transcript_0	0.638155	-0.363799	3	3	pseudo_transcript_0	0.0873136	-1.81546	1	1
OGFOD1	P1P2	0.0952339	-0.111154	2	2	P1P2	0.0334771	-0.162317	2	2	P1P2	0.0906251	-0.172189	1	1	P1P2	0.807362	0.0715977	4	4	P1P2	0.158492	0.0976852	3	3	P1P2	0.0848593	0.224909	1	1	P1P2	0.828544	0.13287	4	4	P1P2	0.628396	0.0921973	4	4	P1P2	0.61088	-0.265935	2	2
F3	P2	0.568323	-0.0570722	7	7	P2	0.0134119	-0.180844	4	4	P2	0.0238486	-0.138832	4	4	P2	0.319517	-0.0395248	5	5	P2	0.018706	0.197531	3	3	P2	0.0848593	0.224333	1	1	P2	0.624354	-0.159005	5	5	P2	0.571502	-0.342247	3	3	P1	0.821959	-0.0822117	2	2
pseudo_11875	pseudo_transcript_1	0.601092	-0.0329699	2	2	pseudo_transcript_1	0.15693	-0.123107	2	2	pseudo_transcript_1	0.0930741	-0.164601	1	1	pseudo_transcript_1	0.167239	0.129678	1	1	pseudo_transcript_0	0.110551	0.125659	3	3	pseudo_transcript_1	0.0851275	0.223878	1	1	pseudo_transcript_0	0.349778	0.368491	3	3	pseudo_transcript_1	0.599246	0.293965	2	2	pseudo_transcript_1	0.530854	0.370086	1	1
pseudo_14984	pseudo_transcript_0	0.677242	-0.0277303	4	4	pseudo_transcript_0	0.092666	-0.224515	1	1	pseudo_transcript_0	0.0930741	-0.164601	1	1	pseudo_transcript_0	0.165442	0.115791	6	6	pseudo_transcript_0	0.409488	0.133093	2	2	pseudo_transcript_0	0.0851275	0.223878	1	1	pseudo_transcript_0	0.511004	-0.269772	3	3	pseudo_transcript_0	0.229658	0.678345	2	2	pseudo_transcript_0	0.530854	0.370086	1	1
DHX8	P1P2	0.0226551	-0.199406	2	2	P1P2	0.11161	0.0671184	3	3						P1P2	0.0392918	0.157124	2	2	P1P2	0.854466	0.000965813	3	3	P1P2	0.0853964	0.222872	1	1	P1P2	0.0929034	-0.722466	3	3	P1P2	0.396737	-0.457773	4	4	P1P2	0.133445	-0.683361	2	2
MRGPRG	ENST00000332314.3	0.575072	-0.0234505	3	3											ENST00000332314.3	0.312728	0.110968	2	2	ENST00000332314.3	0.626897	0.0558656	2	2	ENST00000332314.3	0.0853964	0.221308	1	1	ENST00000332314.3	0.240408	-0.895172	1	1
ACLY	P1P2	0.528328	0.0437551	4	4	P1P2	0.433548	0.0337637	3	3	P1P2	0.0528382	0.0916314	2	2	P1P2	0.144912	0.182254	7	7	P1P2	0.0294483	0.282372	6	6	P1P2	0.0943477	0.221019	5	5	P1P2	0.242963	0.56567	6	6	P1P2	0.0341468	1.37426	4	4	P1P2	0.131356	0.538357	3	3
NECAB1	P1P2	0.736748	-0.0134375	5	5	P1P2	0.66448	-0.0335917	3	3	P1P2	0.308906	-0.0388388	2	2	P1P2	0.255514	0.0733053	2	2	P1P2	0.76995	0.0359248	6	6	P1P2	0.0853964	0.220614	1	1	P1P2	0.209953	1.01596	1	1	P1P2	0.665471	0.313498	2	2	P1P2	0.131311	1.21212	1	1
TOM1L2	P1P2	0.856235	-0.0137603	1	1	P1P2	0.532048	0.0447176	5	5						P1P2	0.0212893	0.218207	2	2	P1P2	0.828012	-0.0914956	6	6	P1P2	0.0853964	0.219925	1	1	P1P2	0.413483	0.761626	5	5	P1P2	0.102946	-1.4802	5	5	P1P2	0.762839	-0.119959	3	3
pseudo_8522	pseudo_transcript_0	0.47131	-0.0951503	5	5	pseudo_transcript_0	0.545919	-0.0837255	4	4	pseudo_transcript_0	0.850391	-0.0911672	2	2	pseudo_transcript_0	0.126353	0.0296508	5	5	pseudo_transcript_0	0.0181216	0.217629	5	5	pseudo_transcript_0	0.0149852	0.219662	2	2	pseudo_transcript_0	0.514275	-0.775983	4	4	pseudo_transcript_0	0.214641	0.831016	4	4	pseudo_transcript_0	0.510615	-0.328413	2	2
ZADH2	P1P2	0.0840341	-0.0811943	3	3	P1P2	0.377656	-0.0575877	4	4	P1P2	0.216605	-0.0475003	3	3	P1P2	0.318067	0.0853174	3	3	P1P2	0.224988	0.0910373	3	3	P1P2	0.0853964	0.2195	1	1	P1P2	0.394182	-0.197598	5	5	P1P2	0.258402	0.548096	3	3	P1P2	0.585008	0.258333	2	2
pseudo_18749	pseudo_transcript_0	0.0299104	-0.161235	5	5	pseudo_transcript_0	0.0637346	-0.147742	5	5	pseudo_transcript_0	0.0259319	-0.102286	3	3	pseudo_transcript_0	0.229795	0.148783	6	6	pseudo_transcript_0	0.00630989	0.289283	7	7	pseudo_transcript_0	0.00283929	0.219033	5	5	pseudo_transcript_0	0.222746	-0.816067	4	4	pseudo_transcript_0	0.165299	0.880022	4	4	pseudo_transcript_0	0.0684987	0.8358	2	2
ADPRM	P1P2	0.331279	-0.0724248	1	1	P1P2	0.537532	-0.0446965	1	1						P1P2	0.888424	0.0524995	2	2	P1P2	0.126415	0.12119	2	2	P1P2	0.0853964	0.215812	1	1	P1P2	0.00367242	-1.59655	4	4	P1P2	0.31407	0.621801	2	2
PCDHGC4	P1P2	0.566486	-0.0221729	3	3	P1P2	0.653922	-0.0401256	3	3	P1P2	0.0934282	-0.159172	1	1	P1P2	0.978404	-0.00911499	3	3	P1P2	0.454901	0.0661626	4	4	P1P2	0.0853964	0.215629	1	1	P1P2	0.807267	0.124358	5	5	P1P2	0.731511	0.217671	3	3	P1P2	0.243912	0.494579	2	2
pseudo_15400	pseudo_transcript_0	0.55903	-0.0278595	5	5	pseudo_transcript_0	0.61544	-0.0410596	4	4	pseudo_transcript_0	0.482759	-0.0220922	2	2	pseudo_transcript_0	0.944306	5.10528e-05	4	4	pseudo_transcript_0	0.173013	0.0782566	4	4	pseudo_transcript_0	0.085666	0.214615	1	1	pseudo_transcript_0	0.333811	-0.591084	5	5	pseudo_transcript_0	0.424122	-0.636591	2	2	pseudo_transcript_0	0.220401	-0.604811	2	2
pseudo_16921	pseudo_transcript_1	0.122084	-0.141743	5	5	pseudo_transcript_1	0.636629	-0.0679648	3	3	pseudo_transcript_1	0.0296374	-0.182609	2	2	pseudo_transcript_1	0.121432	0.136928	5	5	pseudo_transcript_0	0.661729	-0.00983788	4	4	pseudo_transcript_1	0.0862072	0.214413	1	1	pseudo_transcript_1	0.177093	-0.576105	5	5	pseudo_transcript_1	0.454107	0.437718	2	2	pseudo_transcript_1	0.364262	-0.411724	2	2
pseudo_6357	pseudo_transcript_0	0.893527	-0.00989316	5	5	pseudo_transcript_0	0.808858	-0.13849	6	6	pseudo_transcript_0	0.808781	-0.0510455	4	4	pseudo_transcript_0	0.573484	0.0314301	4	4	pseudo_transcript_0	0.0286286	0.20513	4	4	pseudo_transcript_0	0.0862072	0.214413	1	1	pseudo_transcript_0	0.377839	-0.802502	5	5	pseudo_transcript_0	0.847251	-0.196302	3	3	pseudo_transcript_0	0.0831226	-0.835289	2	2
FANCF	P1P2	0.558337	0.0433025	1	1	P1P2	0.126876	-0.168792	1	1	P1P2	0.258778	-0.062745	1	1	P1P2	0.429383	0.0626078	1	1	P1P2	0.700614	0.0860028	3	3	P1P2	0.0864789	0.213394	1	1	P1P2	0.508051	0.386621	3	3	P1P2	0.11098	1.71623	1	1	P1P2	0.116462	1.30171	1	1
pseudo_18463	pseudo_transcript_0	0.0733362	0.0947044	4	4	pseudo_transcript_0	0.531717	-0.060245	2	2	pseudo_transcript_0	0.169322	0.0893457	1	1	pseudo_transcript_0	0.445036	-0.0415296	5	5	pseudo_transcript_0	0.0892032	0.305177	1	1	pseudo_transcript_0	0.0867512	0.212294	1	1	pseudo_transcript_0	0.770602	0.315867	5	5	pseudo_transcript_0	0.937177	-0.482329	4	4	pseudo_transcript_0	0.379614	0.387755	2	2
EXTL1	P1P2	0.130343	0.0724633	4	4	P1P2	0.0318084	-0.159599	7	7	P1P2	0.457523	0.0382918	2	2	P1P2	0.127629	0.13693	2	2	P1P2	0.564328	0.0922677	4	4	P1P2	0.0870242	0.212117	1	1	P1P2	0.14023	1.37051	1	1	P1P2	0.567815	-0.611863	4	4
ANKFY1	P1P2	0.292265	0.0841541	1	1	P1P2	0.0884784	-0.239892	1	1						P1P2	0.156684	0.13729	1	1	P1P2	0.0487698	0.19851	2	2	P1P2	0.0870242	0.210844	1	1	P1P2	0.0872425	2.99624	1	1	P1P2	0.708187	0.197367	2	2	P1P2	0.0954844	1.5978	1	1
PFAS	P1P2	0.796215	-0.01331	2	2	P1P2	0.0743005	0.105278	4	4	P1P2	0.943738	0.00369399	2	2	P1P2	0.242426	0.073726	2	2	P1P2	0.320878	0.0903017	4	4	P1P2	0.0870242	0.207629	1	1	P1P2	0.971008	-0.0790385	4	4	P1P2	0.438327	0.704417	3	3	P1P2	0.100422	1.46548	1	1
SUCO	P1P2	0.0458735	-0.163005	3	3	P1P2	0.0566917	-0.14786	2	2	P1P2	0.0302193	-0.185186	2	2	P1P2	0.0178296	0.244422	2	2	P1P2	0.818133	-0.0420463	2	2	P1P2	0.0870242	0.2065	1	1	P1P2	0.592795	0.529793	3	3	P1P2	0.305294	-1.01747	1	1	P1P2	0.165361	-1.02126	1	1
pseudo_3089	pseudo_transcript_0	0.0825003	-0.0760432	3	3	pseudo_transcript_1	0.390214	0.0319387	3	3	pseudo_transcript_1	0.653832	0.0303574	1	1	pseudo_transcript_0	0.017707	0.25647	2	2	pseudo_transcript_0	0.0146071	0.21911	8	8	pseudo_transcript_0	0.0155133	0.206449	2	2	pseudo_transcript_0	0.184576	0.684443	4	4	pseudo_transcript_0	0.190253	1.13241	5	5	pseudo_transcript_1	0.509797	0.387812	1	1
VSX2	P1P2	0.765185	0.0445089	3	3	P1P2	0.209419	-0.090652	5	5	P1P2	0.0986596	-0.0686069	2	2	P1P2	0.793352	-0.0445514	5	5	P1P2	0.945854	0.0326316	3	3	P1P2	0.0870242	0.203276	1	1	P1P2	0.710442	0.278115	2	2	P1P2	0.517564	-0.410391	3	3	P1P2	0.18203	0.878106	1	1
SGMS2	P1P2	0.65829	-0.0394847	3	3	P1P2	0.590325	0.0209957	3	3	P1P2	0.657998	-0.0342728	2	2	P1P2	0.231619	0.102066	1	1	P1P2	0.975622	0.015905	4	4	P1P2	0.0870242	0.201907	1	1	P1P2	0.323833	0.708763	1	1	P1P2	0.473795	-0.509969	2	2
pseudo_18111	pseudo_transcript_0	0.714453	0.0175852	3	3	pseudo_transcript_0	0.467022	-0.0512579	3	3	pseudo_transcript_0	0.851658	-0.00323609	1	1	pseudo_transcript_0	0.99377	0.0364013	3	3	pseudo_transcript_0	0.746918	-0.0340282	4	4	pseudo_transcript_0	0.0872979	0.201443	1	1	pseudo_transcript_0	0.552114	0.296097	3	3	pseudo_transcript_0	0.277478	-0.787823	2	2	pseudo_transcript_0	0.221336	-0.832211	1	1
LINGO3	P1P2	0.0876065	-0.258948	1	1	P1P2	0.720611	-0.0238201	3	3	P1P2	0.0885676	-0.184042	1	1	P1P2	0.543354	0.0818562	2	2	P1P2	0.42605	0.0734397	2	2	P1P2	0.0875723	0.201376	1	1	P1P2	0.22107	-0.612496	2	2	P1P2	0.592855	0.294362	2	2	P1P2	0.906358	-0.0184571	1	1
ATP6AP1	P1P2	0.0289767	-0.106097	3	3	P1P2	0.303113	-0.0849232	1	1	P1P2	0.128148	-0.111816	1	1	P1P2	0.0698737	0.248151	4	4	P1P2	0.833542	-0.0666269	3	3	P1P2	0.0875723	0.201043	1	1	P1P2	0.359387	-0.910046	2	2	P1P2	0.508019	0.411769	2	2	P1P2	0.259464	0.693897	1	1
pseudo_13009	pseudo_transcript_0	0.203944	-0.0729915	5	5	pseudo_transcript_0	0.170602	-0.0862	4	4	pseudo_transcript_0	0.0169179	-0.0939145	3	3	pseudo_transcript_0	0.666071	0.0360257	3	3	pseudo_transcript_0	0.72528	0.0675169	4	4	pseudo_transcript_0	0.0878475	0.200255	1	1	pseudo_transcript_0	0.139168	-1.30874	7	7	pseudo_transcript_0	0.0593238	0.954435	4	4	pseudo_transcript_0	0.318705	0.428633	4	4
pseudo_5916	pseudo_transcript_0	0.0207837	-0.118619	3	3	pseudo_transcript_0	0.430783	0.0494355	5	5	pseudo_transcript_0	0.210961	-0.0728309	1	1	pseudo_transcript_0	0.332661	0.0668493	3	3	pseudo_transcript_1	0.0534658	0.157412	4	4	pseudo_transcript_1	0.0878475	0.200255	1	1	pseudo_transcript_1	0.0202866	2.11211	6	6	pseudo_transcript_0	0.210719	-0.89591	5	5	pseudo_transcript_1	0.271622	0.468079	2	2
ELOVL3	P1P2	0.356411	-0.0721605	5	5	P1P2	0.253127	-0.0618442	2	2	P1P2	0.0285024	-0.114529	2	2	P1P2	0.194109	0.123138	5	5	P1P2	0.391446	-0.0751224	4	4	P1P2	0.0881233	0.198936	1	1	P1P2	0.559177	-0.111683	5	5	P1P2	0.43924	0.795955	2	2	P1P2	0.875853	0.062537	2	2
TRIP12	P1P2	0.110661	-0.129831	2	2	P1P2	0.915161	0.00273633	3	3						P1P2	0.372028	0.0636897	5	5	P1P2	0.853438	-0.012001	4	4	P1P2	0.0881233	0.198862	1	1	P1P2	0.191383	-0.885767	3	3	P1P2	0.700418	-0.332756	1	1
FXYD3	P1P2	0.896981	0.0157121	2	2	P1P2	0.135679	-0.0937853	3	3	P1P2	0.2294	-0.0709605	1	1	P1P2	0.0549962	0.155741	2	2	P1P2	0.556015	0.0332128	3	3	P1P2	0.0881233	0.198715	1	1	P1P2	0.0360546	1.31105	5	5	P1P2	0.914105	-0.299315	2	2	P1P2	0.506938	0.386635	2	2
pseudo_17957	pseudo_transcript_0	0.72461	0.0443895	7	7	pseudo_transcript_0	0.347286	0.0424815	4	4	pseudo_transcript_0	0.887584	0.00378115	3	3	pseudo_transcript_0	0.526643	-0.0181933	5	5	pseudo_transcript_0	0.272595	0.133845	5	5	pseudo_transcript_0	0.0883998	0.198283	1	1	pseudo_transcript_0	0.387516	-0.224624	6	6	pseudo_transcript_0	0.530729	0.418694	2	2	pseudo_transcript_0	0.356104	0.522585	1	1
pseudo_2868	pseudo_transcript_0	0.9877	-0.0055488	4	4											pseudo_transcript_0	0.550327	0.00256035	5	5	pseudo_transcript_0	0.947245	-0.0107046	2	2	pseudo_transcript_0	0.0883998	0.198283	1	1	pseudo_transcript_0	0.52029	-0.297323	3	3	pseudo_transcript_0	0.211967	1.07848	1	1	pseudo_transcript_0	0.173546	0.911927	1	1
pseudo_6931	pseudo_transcript_0	0.458712	-0.0548318	2	2	pseudo_transcript_0	0.0968768	-0.108561	2	2	pseudo_transcript_0	0.612475	-0.0197949	1	1	pseudo_transcript_0	0.418767	-0.00126944	4	4	pseudo_transcript_0	0.193051	0.0783542	3	3	pseudo_transcript_0	0.0883998	0.198283	1	1	pseudo_transcript_0	0.466919	-0.51489	1	1
USP13	P1P2	0.407947	0.0306071	5	5	P1P2	0.851482	-0.00976194	2	2	P1P2	0.534649	0.0403325	1	1	P1P2	0.918466	-0.00998394	5	5	P1P2	0.04862	0.185986	2	2	P1P2	0.088677	0.198117	1	1	P1P2	0.552548	-0.493328	4	4	P1P2	0.397896	0.476227	2	2	P1P2	0.691352	-0.159749	2	2
TMEM233	P1P2	0.122881	-0.0989397	3	3	P1P2	0.157306	-0.10488	4	4	P1P2	0.104564	-0.13723	1	1	P1P2	0.590413	0.061617	2	2	P1P2	0.538957	0.0694849	4	4	P1P2	0.088677	0.19781	1	1	P1P2	0.213811	-0.768405	4	4	P1P2	0.172386	-0.788864	5	5	P1P2	0.250569	-0.637678	4	4
EML4	P1P2	0.308703	-0.0520169	4	4	P1P2	0.154748	-0.0989168	3	3	P1P2	0.642085	0.0306033	1	1	P1P2	0.048117	0.137193	4	4	P1P2	0.830205	-0.014832	3	3	P1P2	0.088677	0.197042	1	1	P1P2	0.939674	-0.0115074	5	5	P1P2	0.333165	-0.93427	1	1
LRRC8D	P2	0.805074	0.0442373	5	5	P2	0.415104	-0.0473937	2	2	P2	0.269652	-0.0594581	1	1	P2	0.552481	-0.0340174	5	5	P2	0.0771644	0.137022	3	3	P2	0.088677	0.197019	1	1	P1	0.225622	0.594542	2	2	P2	0.105279	1.16134	2	2	P2	0.131311	1.1946	1	1
LOXL2	P1P2	0.130265	-0.14533	1	1	P1P2	0.815978	0.00811581	3	3	P1P2	0.240853	-0.0683355	1	1	P1P2	0.535264	0.0678442	3	3	P1P2	0.432859	0.0924239	4	4	P1P2	0.088677	0.196698	1	1	P1P2	0.31897	0.721048	1	1	P1P2	0.763062	0.17804	2	2	P1P2	0.147587	1.08039	1	1
RDH12	P1P2	0.785866	-0.0103681	3	3	P1P2	0.518172	-0.0365013	3	3	P1P2	0.608658	0.03278	1	1	P1P2	0.00492224	0.218281	3	3	P1P2	0.991134	-0.0334997	4	4	P1P2	0.088677	0.195993	1	1	P1P2	0.207069	1.04099	1	1	P1P2	0.419016	-0.621803	3	3	P1P2	0.431324	-0.460892	1	1
BTG4	P1P2	0.0150775	-0.120881	5	5	P1P2	0.0442881	-0.19587	6	6	P1P2	0.012039	-0.124267	3	3	P1P2	0.996784	0.0391346	5	5	P1P2	0.0109983	0.232525	4	4	P1P2	0.088677	0.195935	1	1	P1P2	0.797588	-0.308297	3	3	P1P2	0.239168	0.745602	4	4	P1P2	0.13235	1.18353	1	1
LRRFIP1	P1P2	0.939511	-0.0231842	6	6	P1P2	0.945714	-0.0602043	6	6	P1P2	0.808781	-0.00110312	4	4	P1P2	0.551942	0.118231	5	5	P1P2	0.106329	0.15466	4	4	P1P2	0.088677	0.194837	1	1	P1P2	0.921475	0.394309	4	4	P1P2	0.867049	0.0483219	4	4	P1P2	0.518011	1.02868	2	2
GPSM3	P1P2	0.0772405	-0.167813	2	2	P1P2	0.603139	-0.022178	4	4	P1P2	0.0955758	-0.150722	1	1	P1P2	0.0817987	0.198644	2	2	P1P2	0.988769	-0.0798943	5	5	P1P2	0.088677	0.194458	1	1	P1P2	0.723072	-0.376813	5	5	P1P2	0.474064	0.439136	4	4	P1P2	0.944054	-0.0102185	3	3
DDX56	P1P2	0.128755	-0.148029	1	1	P1P2	0.322068	-0.0801164	1	1	P1P2	0.123658	-0.114073	1	1	P1P2	0.116702	0.174804	1	1	P1P2	0.295566	0.0781618	3	3	P1P2	0.088677	0.194353	1	1	P1P2	0.264162	-0.846781	2	2	P1P2	0.210255	0.766892	2	2	P1P2	0.971416	-0.0399446	2	2
LRRN1	P1P2	0.402779	-0.0640502	2	2											P1P2	0.404561	0.0715206	2	2	P1P2	0.94568	-0.0408669	2	2	P1P2	0.088677	0.194212	1	1	P1P2	0.898496	-0.0842737	1	1	P1P2	0.119403	-1.99954	1	1
HMGCR						P1P2	0.791731	0.0143667	4	4						P1P2	0.182375	0.0887359	2	2	P1P2	0.0305925	0.202882	5	5	P1P2	0.088677	0.193667	1	1	P1P2	0.0117134	1.31474	4	4	P1P2	0.653386	1.04683	7	7	P1P2	0.35524	0.969669	2	2
ZC3H8	P1P2	0.314815	-0.0594986	3	3	P1P2	0.0252756	-0.124952	3	3	P1P2	0.27123	-0.0592022	1	1	P1P2	0.263273	0.0618128	3	3	P1P2	0.00831413	0.217311	3	3	P1P2	0.088677	0.193005	1	1	P1P2	0.338374	-0.560064	4	4	P1P2	0.250535	0.977464	1	1	P1P2	0.667217	-0.231089	1	1
SHISA9	P1P2	0.788875	-0.0214021	1	1	P1P2	0.367907	-0.0481133	2	2						P1P2	0.769861	0.0341543	3	3	P1P2	0.799858	0.028063	2	2	P1P2	0.088677	0.191643	1	1	P1P2	0.947558	-0.0501476	1	1	P1P2	0.291582	0.665457	2	2
pseudo_14511	pseudo_transcript_0	0.400409	-0.0444805	2	2	pseudo_transcript_0	0.033805	-0.116362	3	3						pseudo_transcript_0	0.219054	0.0601481	3	3	pseudo_transcript_0	0.212104	0.163311	5	5	pseudo_transcript_0	0.0170023	0.190866	2	2	pseudo_transcript_0	0.687851	-0.183608	4	4	pseudo_transcript_0	0.86852	-0.446924	3	3	pseudo_transcript_0	0.847213	-0.0590548	1	1
pseudo_2752	pseudo_transcript_0	0.440989	-0.147478	2	2	pseudo_transcript_0	0.190856	-0.0800177	6	6	pseudo_transcript_0	0.239344	-0.0930256	2	2	pseudo_transcript_0	0.197012	0.172978	2	2	pseudo_transcript_0	0.948687	-0.0154119	4	4	pseudo_transcript_0	0.0889549	0.190375	1	1	pseudo_transcript_0	0.524679	0.486878	2	2	pseudo_transcript_0	0.698378	-0.195665	3	3	pseudo_transcript_0	0.680813	0.178045	2	2
pseudo_9294	pseudo_transcript_0	0.507067	-0.0187572	3	3	pseudo_transcript_0	0.816316	-0.0137488	2	2	pseudo_transcript_0	0.087553	-0.1939	1	1	pseudo_transcript_0	0.197551	0.165344	4	4	pseudo_transcript_0	0.979948	-0.0148166	3	3	pseudo_transcript_0	0.0889549	0.190375	1	1	pseudo_transcript_0	0.664258	0.411991	5	5	pseudo_transcript_0	0.50932	-0.433964	3	3	pseudo_transcript_0	0.174678	-0.673515	2	2
AHCYL2	P1P2	0.96787	-0.012268	4	4	P1P2	0.445408	-0.0319059	4	4	P1P2	0.605086	-0.0248225	2	2	P1P2	0.805806	0.0365136	5	5	P1P2	0.187085	0.0990106	3	3	P1P2	0.0892335	0.189704	1	1	P1P2	0.605659	-0.2078	4	4	P1P2	0.266614	0.893041	2	2	P1P2	0.505104	0.332429	2	2
pseudo_11037	pseudo_transcript_0	0.184422	0.0791838	4	4	pseudo_transcript_0	0.291347	0.0448713	3	3	pseudo_transcript_0	0.327782	0.0610821	1	1	pseudo_transcript_0	0.914628	0.0110776	5	5	pseudo_transcript_0	0.542818	0.0739874	3	3	pseudo_transcript_0	0.0895128	0.189639	1	1	pseudo_transcript_0	0.979256	0.488639	6	6	pseudo_transcript_0	0.647471	0.212223	4	4	pseudo_transcript_0	0.760591	0.0915264	4	4
pseudo_14363	pseudo_transcript_0	0.00605976	-0.128129	4	4	pseudo_transcript_1	0.0140554	0.113394	5	5	pseudo_transcript_1	0.016433	0.108872	5	5	pseudo_transcript_0	0.0602814	0.145288	2	2	pseudo_transcript_0	0.876884	0.113709	7	7	pseudo_transcript_0	0.0895128	0.189639	1	1	pseudo_transcript_1	0.437653	0.326871	4	4	pseudo_transcript_1	0.155596	1.04014	4	4	pseudo_transcript_1	0.147956	0.683504	3	3
pseudo_14646	pseudo_transcript_1	0.704619	0.0168461	3	3	pseudo_transcript_0	0.111599	-0.122364	2	2	pseudo_transcript_1	0.547316	-0.0228729	2	2	pseudo_transcript_1	0.628668	0.0217475	3	3	pseudo_transcript_0	0.453415	0.0869144	3	3	pseudo_transcript_0	0.0895128	0.189639	1	1	pseudo_transcript_1	0.512628	0.407626	1	1	pseudo_transcript_0	0.425543	-0.805611	3	3
pseudo_14991	pseudo_transcript_0	0.0126119	0.126908	5	5	pseudo_transcript_0	0.866125	0.0078207	2	2	pseudo_transcript_0	0.173387	0.0602696	2	2	pseudo_transcript_0	0.690905	0.0704945	7	7	pseudo_transcript_0	0.0745481	0.186844	2	2	pseudo_transcript_0	0.0895128	0.189639	1	1	pseudo_transcript_0	0.0423446	1.71696	6	6	pseudo_transcript_0	0.180417	-1.52102	1	1	pseudo_transcript_0	0.325283	-0.609683	1	1
pseudo_7956	pseudo_transcript_0	0.416065	0.0629137	1	1	pseudo_transcript_0	0.771976	0.010437	3	3						pseudo_transcript_0	0.33933	-0.0437486	4	4	pseudo_transcript_0	0.364998	0.0945799	3	3	pseudo_transcript_0	0.0895128	0.189639	1	1	pseudo_transcript_0	0.76972	0.0640755	4	4	pseudo_transcript_0	0.324824	0.544384	2	2	pseudo_transcript_0	0.803002	0.146949	1	1
ERGIC2	P1P2	0.200364	-0.0800338	4	4	P1P2	0.113188	-0.0848031	3	3	P1P2	0.0441599	-0.0678768	3	3	P1P2	0.183807	0.0925841	4	4	P1P2	0.149763	0.113991	4	4	P1P2	0.0897928	0.189569	1	1	P1P2	0.522844	-0.351514	2	2	P1P2	0.893659	-0.0121425	2	2	P1P2	0.228308	0.750228	1	1
pseudo_10303	pseudo_transcript_0	0.479373	-0.0311084	6	6	pseudo_transcript_0	0.755638	-0.0259075	5	5	pseudo_transcript_0	0.718978	-0.0115025	4	4	pseudo_transcript_0	0.18836	0.0549772	5	5	pseudo_transcript_0	0.15669	0.141915	4	4	pseudo_transcript_0	0.0900735	0.189361	1	1	pseudo_transcript_0	0.85797	0.112888	5	5	pseudo_transcript_0	0.459705	0.45815	4	4	pseudo_transcript_0	0.195575	0.653517	2	2
pseudo_2828	pseudo_transcript_0	0.409699	-0.0468996	7	7	pseudo_transcript_0	0.327542	-0.0501282	3	3	pseudo_transcript_0	0.520947	-0.0151389	3	3	pseudo_transcript_0	0.946458	-0.0162437	4	4	pseudo_transcript_0	0.029778	0.20068	2	2	pseudo_transcript_0	0.0900735	0.189361	1	1	pseudo_transcript_0	0.45309	-0.636448	4	4	pseudo_transcript_0	0.521467	0.334048	3	3	pseudo_transcript_0	0.707334	-0.1512	3	3
ACOT6	P1P2	0.313645	-0.0427382	6	6	P1P2	0.304969	-0.227661	6	6	P1P2	0.644556	-0.0818528	4	4	P1P2	0.0887232	0.204467	7	7	P1P2	0.558035	0.100269	7	7	P1P2	0.0524592	0.188429	6	6	P1P2	0.677497	0.667878	7	7	P1P2	0.497822	-0.463503	5	5	P1P2	0.32863	-0.385042	4	4
CTAGE1	P1P2	0.466419	-0.0286183	3	3	P1P2	0.0956909	-0.21146	1	1	P1P2	0.107705	-0.127359	1	1	P1P2	0.826933	0.00146986	3	3	P1P2	0.019528	0.169062	3	3	P1P2	0.0903549	0.188416	1	1	P1P2	0.946817	-0.0134653	3	3	P1P2	0.916899	-0.0880968	1	1	P1P2	0.521588	0.373771	1	1
MVK	P1P2	0.127969	-0.0750448	6	6	P1P2	0.94714	-0.0423439	6	6	P1P2	0.71221	-0.0171574	4	4	P1P2	0.00147621	0.242142	6	6	P1P2	0.0026799	0.331243	7	7	P1P2	0.0043212	0.18792	4	4	P1P2	0.00756509	1.5672	10	10	P1P2	1.27655e-06	2.53467	9	9	P1P2	3.21531e-06	1.81238	9	9
ARL15	P1P2	0.796025	-0.0881367	6	6	P1P2	0.524344	0.04151	5	5	P1P2	0.547895	0.0304704	4	4	P1P2	0.598908	0.14687	7	7	P1P2	0.0481711	0.195306	7	7	P1P2	0.24576	0.18789	6	6	P1P2	0.749171	-0.16381	6	6	P1P2	0.0300099	1.63904	6	6	P1P2	0.140776	0.597849	4	4
ARL4C	P1P2	0.941316	0.0189088	7	7	P1P2	0.900686	-0.0676622	7	7	P1P2	0.756929	0.0157646	5	5	P1P2	0.422871	-0.0156294	6	6	P1P2	0.556532	0.064784	4	4	P1P2	0.0903549	0.187667	1	1	P1P2	0.909014	-0.180776	8	8	P1P2	0.448568	-0.65306	2	2	P1P2	0.233042	0.735365	1	1
HSD3B7	P1P2	0.0871536	0.151534	5	5	P1P2	0.979547	-0.0111427	2	2	P1P2	0.194548	0.072494	2	2	P1P2	0.834319	0.0304275	5	5	P1P2	0.135035	0.171493	4	4	P1P2	0.0203607	0.186767	2	2	P1P2	0.158975	1.55551	6	6
KAT2B	P1P2	0.910364	0.0092831	3	3	P1P2	0.37875	-0.0555313	2	2						P1P2	0.0980568	0.0929879	3	3	P1P2	0.686412	0.0222595	4	4	P1P2	0.0909199	0.185382	1	1	P1P2	0.969461	-0.305268	5	5	P1P2	0.0917178	-2.63002	1	1	P1P2	0.099585	-1.53466	1	1
SLC6A18	P1P2	0.093289	0.237113	1	1	P1P2	0.278823	-0.0831856	2	2						P1P2	0.181749	0.0772525	2	2	P1P2	0.197248	0.140184	4	4	P1P2	0.0909199	0.185176	1	1	P1P2	0.739459	0.668866	4	4	P1P2	0.388084	0.348731	4	4	P1P2	0.149738	0.905905	2	2
NMT2	P1P2	0.686727	0.041896	4	4	P1P2	0.708368	-0.0877684	6	6	P1P2	0.982597	0.00546456	2	2	P1P2	0.908501	-0.015522	4	4	P1P2	0.66499	0.082971	2	2	P1P2	0.0909199	0.184905	1	1	P1P2	0.897279	0.178946	5	5	P1P2	0.476645	0.387011	2	2	P1P2	0.460362	0.414996	1	1
pseudo_14246	pseudo_transcript_0	0.0156783	-0.14687	4	4	pseudo_transcript_0	0.212104	-0.165441	5	5	pseudo_transcript_0	0.0226322	-0.15282	3	3	pseudo_transcript_0	0.108092	0.115913	5	5	pseudo_transcript_0	0.0192781	0.189831	3	3	pseudo_transcript_0	0.0187205	0.184602	2	2	pseudo_transcript_0	0.506279	-0.549709	4	4	pseudo_transcript_0	0.262274	0.790614	2	2	pseudo_transcript_0	0.839843	0.178069	2	2
MAPRE3	P1P2	0.975169	0.0260863	5	5	P1P2	0.525591	-0.0859489	3	3	P1P2	0.614072	-0.0235645	2	2	P1P2	0.634115	0.0439751	4	4	P1P2	0.0354144	0.280906	2	2	P1P2	0.0203607	0.184396	2	2	P1P2	0.427285	1.02931	6	6	P1P2	0.317765	0.828655	1	1	P1P2	0.137646	1.14202	1	1
STBD1	P1P2	0.753236	0.0199972	5	5	P1P2	0.147172	-0.073549	3	3	P1P2	0.377951	-0.0280276	3	3	P1P2	0.432116	0.066628	4	4	P1P2	0.100926	0.161153	4	4	P1P2	0.0909199	0.184156	1	1	P1P2	0.259467	0.577157	4	4	P1P2	0.758147	-0.267246	2	2	P1P2	0.249322	0.707476	1	1
pseudo_16241	pseudo_transcript_0	0.600791	-0.0219263	3	3	pseudo_transcript_0	0.0250046	0.0988388	5	5	pseudo_transcript_0	0.346519	0.0361434	3	3	pseudo_transcript_1	0.0161546	0.136191	4	4	pseudo_transcript_1	0.422342	0.0795774	4	4	pseudo_transcript_1	0.0188261	0.183542	2	2	pseudo_transcript_0	0.691644	0.188173	2	2	pseudo_transcript_1	0.228622	0.675555	3	3	pseudo_transcript_1	0.133922	1.17714	1	1
TPX2	P1P2	0.715613	-0.0270509	1	1	P1P2	0.818329	0.0146546	1	1						P1P2	0.269514	0.0929274	1	1	P1P2	0.0302746	0.220189	2	2	P1P2	0.0909199	0.183034	1	1	P1P2	0.465699	0.479857	1	1
ACTR3C	P1P2	0.932254	-0.00136195	3	3	P1P2	0.664506	0.0316245	4	4	P1P2	0.676254	-0.0139263	1	1	P1P2	0.347682	0.0532911	3	3	P1P2	0.575381	0.0708579	5	5	P1P2	0.0307376	0.18299	2	2	P1P2	0.255356	0.489285	3	3	P1P2	0.150882	-1.20911	3	3	P1P2	0.945023	0.0726619	1	1
pseudo_6163	pseudo_transcript_0	0.971134	0.00259642	3	3	pseudo_transcript_0	0.771647	-0.0689906	7	7	pseudo_transcript_0	0.427046	-0.0266212	2	2	pseudo_transcript_0	0.022924	0.163761	4	4	pseudo_transcript_0	0.00510017	0.23099	4	4	pseudo_transcript_0	0.00219602	0.182971	4	4	pseudo_transcript_0	0.110251	0.886143	2	2	pseudo_transcript_0	0.0580187	1.38131	4	4	pseudo_transcript_0	0.168391	0.620194	2	2
WNT10B	P1P2	0.0250781	-0.143198	5	5	P1P2	0.856386	-0.0232102	6	6	P1P2	0.28525	-0.0385254	4	4	P1P2	0.178799	0.082985	5	5	P1P2	0.0389001	0.196875	3	3	P1P2	0.0909199	0.182931	1	1	P1P2	0.702936	-0.461982	4	4	P1P2	0.023619	1.72976	2	2	P1P2	0.151019	1.03402	1	1
RINT1	P1P2	0.199802	-0.107009	1	1	P1P2	0.235251	0.0866473	1	1						P1P2	0.190452	0.0751996	2	2	P1P2	0.0936415	0.227379	4	4	P1P2	0.0909199	0.182393	1	1	P1P2	0.715427	-0.143588	3	3	P1P2	0.398411	-0.502301	2	2	P1P2	0.702984	0.214546	1	1
pseudo_18522	pseudo_transcript_0	0.934992	0.0472061	6	6	pseudo_transcript_0	0.0642985	-0.0836319	5	5	pseudo_transcript_0	0.648462	-0.0160998	4	4	pseudo_transcript_0	0.311265	0.0739754	6	6	pseudo_transcript_0	0.250564	0.257708	6	6	pseudo_transcript_0	0.079613	0.182283	5	5	pseudo_transcript_0	0.430604	0.631719	6	6	pseudo_transcript_0	0.508507	0.427895	4	4	pseudo_transcript_0	0.272096	0.596245	3	3
HECW2	P1P2	0.840672	-0.0326205	3	3	P1P2	0.634946	-0.0331007	1	1						P1P2	0.0261661	0.179661	2	2	P1P2	0.849937	0.0475313	5	5	P1P2	0.0909199	0.182134	1	1	P1P2	0.585567	0.410094	2	2	P1P2	0.18678	0.760958	2	2	P1P2	0.162902	0.961317	1	1
pseudo_13343	pseudo_transcript_0	0.990456	0.00540459	2	2	pseudo_transcript_0	0.863569	-0.0298071	4	4	pseudo_transcript_0	0.90298	-0.0418214	2	2	pseudo_transcript_0	0.607759	0.053568	3	3	pseudo_transcript_0	0.800786	-0.0243922	4	4	pseudo_transcript_0	0.0912034	0.182131	1	1	pseudo_transcript_0	0.852649	0.127088	3	3	pseudo_transcript_0	0.777158	0.143704	2	2	pseudo_transcript_0	0.209321	0.798686	1	1
ARHGAP10	P1P2	0.230504	0.0986154	2	2	P1P2	0.118616	0.13775	1	1	P1P2	0.0899351	0.163235	1	1	P1P2	0.698976	0.0146903	4	4	P1P2	0.3872	0.0749842	3	3	P1P2	0.0914877	0.182042	1	1	P1P2	0.816291	0.0739572	3	3
PRTN3	P1	0.0619966	-0.122961	4	4	P2	0.563949	-0.0459256	4	4	P2	0.115395	-0.0612191	2	2	P1	0.0345325	0.141017	4	4	P1	0.288682	-0.0165859	7	7	P2	0.0914877	0.181685	1	1	P2	0.385851	-0.487943	3	3	P2	0.349887	0.547421	2	2	P2	0.188762	0.852541	1	1
pseudo_11606	pseudo_transcript_0	0.917198	0.0142376	3	3	pseudo_transcript_0	0.2192	-0.078188	5	5	pseudo_transcript_0	0.407887	-0.0365199	2	2	pseudo_transcript_0	0.982192	0.00455432	2	2	pseudo_transcript_0	0.341222	0.0973088	6	6	pseudo_transcript_0	0.0917726	0.181281	1	1	pseudo_transcript_0	0.923452	0.0609945	4	4	pseudo_transcript_0	0.904502	-0.0231959	5	5	pseudo_transcript_0	0.112591	1.06037	2	2
pseudo_13701	pseudo_transcript_0	0.412201	0.045984	4	4	pseudo_transcript_0	0.620741	-0.026569	5	5	pseudo_transcript_0	0.712681	-0.00762303	2	2	pseudo_transcript_0	0.461183	0.0463078	4	4	pseudo_transcript_0	0.359925	0.094074	3	3	pseudo_transcript_0	0.0917726	0.181281	1	1	pseudo_transcript_0	0.469979	0.546527	5	5	pseudo_transcript_0	0.366615	0.854176	4	4	pseudo_transcript_0	0.0744837	1.00121	3	3
pseudo_3113	pseudo_transcript_0	0.442517	0.043774	3	3	pseudo_transcript_0	0.0173499	-0.140945	3	3	pseudo_transcript_0	0.402096	-0.0381484	2	2	pseudo_transcript_0	0.0818168	0.084265	3	3	pseudo_transcript_0	0.128289	0.111112	7	7	pseudo_transcript_0	0.0917726	0.181281	1	1	pseudo_transcript_0	0.144914	0.794192	4	4	pseudo_transcript_0	0.727468	0.0265599	4	4	pseudo_transcript_0	0.0895883	1.80527	1	1
pseudo_8026	pseudo_transcript_0	0.952305	0.0124085	2	2	pseudo_transcript_0	0.530151	-0.0365367	3	3	pseudo_transcript_0	0.988739	0.00631124	2	2	pseudo_transcript_0	0.829289	0.0170588	5	5	pseudo_transcript_0	0.466713	0.120191	2	2	pseudo_transcript_0	0.0917726	0.181281	1	1	pseudo_transcript_0	0.932239	-0.10024	5	5	pseudo_transcript_0	0.414567	0.742343	2	2	pseudo_transcript_0	0.0895883	1.80527	1	1
CLEC17A	P1P2	0.977015	0.000348043	6	6	P1P2	0.981202	-0.000990555	5	5	P1P2	0.829216	0.00160912	3	3	P1P2	0.750831	0.0218019	3	3	P1P2	0.200116	-0.101984	6	6	P1P2	0.0920583	0.181114	1	1	P1P2	0.458202	-0.389555	4	4	P1P2	0.833864	-0.197082	4	4	P1P2	0.159266	0.986404	1	1
SLC22A2	P1P2	0.670119	-0.0335131	5	5	P1P2	0.928811	-0.0336256	2	2	P1P2	0.814354	-0.0477252	2	2	P1P2	0.777579	0.0305896	6	6	P1P2	0.49434	-0.0588295	3	3	P1P2	0.0920583	0.181112	1	1	P1P2	0.179534	0.670201	5	5	P1P2	0.457449	-0.527331	2	2	P1P2	0.934887	-0.0284122	2	2
C1orf21	P1P2	0.0353314	-0.178905	3	3	P1P2	0.18673	0.0721972	4	4	P1P2	0.176652	-0.0614233	2	2	P1P2	0.373875	0.122029	4	4	P1P2	0.295155	0.0887452	2	2	P1P2	0.0920583	0.180967	1	1	P1P2	0.837345	0.0634015	3	3	P1P2	0.283675	0.892539	1	1	P1P2	0.363552	0.510566	1	1
XKR7	P1P2	0.261502	0.0913136	1	1	P1P2	0.170801	-0.080099	2	2						P1P2	0.303501	0.0472622	4	4	P1P2	0.0494486	0.201304	2	2	P1P2	0.0920583	0.180759	1	1	P1P2	0.978081	-0.00611235	2	2	P1P2	0.661219	0.341032	1	1
CDC25A	P1P2	0.810929	-0.0601571	5	5	P1P2	0.527045	-0.0645495	6	6	P1P2	0.431541	-0.0304961	2	2	P1P2	0.0463592	0.13229	4	4	P1P2	0.579131	0.0733344	6	6	P1P2	0.0920583	0.180689	1	1	P1P2	0.227697	0.644795	4	4	P1P2	0.0531142	1.44156	6	6	P1P2	0.0360021	1.26592	2	2
pseudo_13066	pseudo_transcript_0	0.243835	-0.0979879	5	5	pseudo_transcript_0	0.139726	-0.123497	7	7	pseudo_transcript_0	0.0854026	-0.142421	5	5	pseudo_transcript_0	0.00506212	0.24477	6	6	pseudo_transcript_0	0.225014	0.157078	8	8	pseudo_transcript_0	0.00154621	0.180638	5	5	pseudo_transcript_0	0.68346	0.255763	4	4	pseudo_transcript_0	0.794268	0.56455	8	8	pseudo_transcript_0	0.315766	0.324489	4	4
LCE4A	ENST00000368777.1	0.179674	-0.0604754	3	3	ENST00000368777.1	0.37481	-0.0787961	5	5	ENST00000368777.1	0.335232	-0.0287921	2	2	ENST00000368777.1	0.83083	0.0450525	2	2	ENST00000368777.1	0.156014	0.0871473	4	4	ENST00000368777.1	0.0920583	0.180014	1	1	ENST00000368777.1	0.583147	0.389852	2	2	ENST00000368777.1	0.262267	0.599987	4	4	ENST00000368777.1	0.0461841	1.04045	2	2
PFDN4	P1P2	0.105717	-0.110212	2	2	P1P2	0.464201	-0.0550991	1	1	P1P2	0.318007	-0.05127	1	1	P1P2	0.58558	0.0964449	2	2	P1P2	0.737307	-0.0484735	2	2	P1P2	0.0920583	0.179675	1	1	P1P2	0.949585	-0.191915	4	4	P1P2	0.430564	-0.51564	2	2
IL17RA	P1P2	0.398157	0.0486047	3	3	P1P2	0.852653	0.0119464	1	1						P1P2	0.714787	0.00201088	3	3	P1P2	0.841628	-0.0532871	2	2	P1P2	0.0920583	0.179136	1	1	P1P2	0.836468	-0.142731	2	2	P1P2	0.112154	1.69021	1	1
SV2B	P1P2	0.668176	0.0582784	5	5	P1P2	0.975718	-0.00975795	3	3	P1P2	0.580995	0.035149	1	1	P1P2	0.56675	0.108875	4	4	P1P2	0.512978	0.0514035	4	4	P1P2	0.0173936	0.178426	2	2	P1P2	0.428792	-0.533131	3	3	P1P2	0.716725	-0.569887	5	5
SLC41A3	P1P2	0.210932	0.0838364	3	3	P1P2	0.663525	-0.0249292	2	2	P1P2	0.393484	0.0536899	1	1	P1P2	0.141265	-0.0701396	4	4	P1P2	0.962379	-0.00177803	2	2	P1P2	0.0920583	0.178385	1	1	P1P2	0.935779	0.0697759	5	5
SLCO3A1	P1P2	0.657706	-0.0413957	4	4	P1P2	0.16883	-0.134029	1	1	P1P2	0.109304	-0.123828	1	1	P1P2	0.127142	0.160377	1	1	P1P2	0.993205	-0.0115244	2	2	P1P2	0.0920583	0.177542	1	1	P1P2	0.725742	0.232274	1	1	P1P2	0.481225	0.38317	2	2	P1P2	0.548282	0.344449	1	1
pseudo_14490	pseudo_transcript_0	0.0954282	-0.0807013	3	3	pseudo_transcript_0	0.123186	-0.12409	3	3	pseudo_transcript_0	0.0811989	-0.0877219	2	2	pseudo_transcript_0	0.322375	-0.0476217	3	3	pseudo_transcript_0	0.651022	0.0885717	4	4	pseudo_transcript_0	0.0923447	0.177264	1	1	pseudo_transcript_0	0.439947	-0.348469	3	3	pseudo_transcript_0	0.661441	-0.619245	3	3	pseudo_transcript_0	0.488762	-0.410814	2	2
pseudo_18750	pseudo_transcript_0	0.857324	-0.0108391	3	3	pseudo_transcript_0	0.202206	-0.0810825	5	5	pseudo_transcript_0	0.168575	-0.0736822	2	2	pseudo_transcript_0	0.552538	0.0276626	3	3	pseudo_transcript_0	0.45531	0.0505253	6	6	pseudo_transcript_0	0.0923447	0.177264	1	1	pseudo_transcript_0	0.185567	-0.799603	4	4	pseudo_transcript_0	0.192425	0.761137	4	4	pseudo_transcript_0	0.596233	0.198237	3	3
C15orf57	P1P2	0.368395	-0.0459388	3	3	P1P2	0.242949	-0.0654168	2	2	P1P2	0.571083	-0.0221297	1	1	P1P2	0.0544611	0.192146	4	4	P1P2	0.00496286	0.172427	4	4	P1P2	0.0184066	0.176584	2	2	P1P2	0.510962	0.733304	6	6	P1P2	0.0396073	1.31718	6	6	P1P2	0.0566275	1.13985	4	4
QSOX2	P1P2	0.276337	0.0587664	2	2	P1P2	0.516713	-0.0473833	1	1						P1P2	0.411063	-0.0477336	2	2	P1P2	0.900422	0.0653089	2	2	P1P2	0.0932082	0.176314	1	1	P1P2	0.963864	-0.0262551	4	4	P1P2	0.285436	0.892539	1	1
pseudo_17536	pseudo_transcript_0	0.106151	-0.0890904	3	3	pseudo_transcript_0	0.63747	-0.0429636	5	5	pseudo_transcript_0	0.220429	-0.070547	2	2	pseudo_transcript_0	0.0333569	0.175258	6	6	pseudo_transcript_0	0.0433569	0.20774	6	6	pseudo_transcript_0	0.0125698	0.176061	3	3	pseudo_transcript_0	0.599372	0.390889	7	7	pseudo_transcript_0	0.0024118	1.65796	4	4	pseudo_transcript_0	0.0433949	0.729956	3	3
S100A10	P2	0.339635	0.0507514	2	2	P1	0.328012	-0.0778886	1	1	P2	0.955999	-0.00121667	2	2	P2	0.442279	-0.0458417	3	3	P1	0.109497	0.221544	1	1	P2	0.0932082	0.175707	1	1	P2	0.11474	-0.806582	5	5	P2	0.154374	1.29919	1	1	P2	0.21753	0.780747	1	1
pseudo_18636	pseudo_transcript_0	0.592307	0.0285828	2	2	pseudo_transcript_0	0.082782	-0.121186	2	2	pseudo_transcript_0	0.24747	-0.0670664	1	1	pseudo_transcript_0	0.548571	0.04838	1	1	pseudo_transcript_0	0.566939	-0.0184104	5	5	pseudo_transcript_0	0.0934975	0.175538	1	1	pseudo_transcript_0	0.900802	0.102246	5	5	pseudo_transcript_0	0.78707	-0.721774	2	2	pseudo_transcript_0	0.866823	-0.230942	2	2
pseudo_5158	pseudo_transcript_0	0.415044	-0.060681	3	3	pseudo_transcript_0	0.992917	-0.00770773	3	3	pseudo_transcript_0	0.220429	-0.0447229	2	2	pseudo_transcript_0	0.548571	0.04838	1	1	pseudo_transcript_0	0.229309	0.117292	3	3	pseudo_transcript_0	0.0934975	0.175538	1	1	pseudo_transcript_0	0.263862	1.09086	3	3	pseudo_transcript_0	0.0361875	1.05286	3	3	pseudo_transcript_0	0.177424	0.905179	1	1
NR4A3	P1P2	0.0838366	-0.129759	7	7	P1P2	0.0933335	-0.097312	6	6	P1P2	0.0144067	-0.0955971	5	5	P1P2	0.598804	0.0607648	2	2	P1P2	0.105429	0.152842	4	4	P1P2	0.0937874	0.175439	1	1	P1P2	0.479817	0.409921	2	2	P1P2	0.655452	0.169783	3	3	P1P2	0.246004	0.711003	1	1
pseudo_17682	pseudo_transcript_0	0.398727	-0.0545009	4	4	pseudo_transcript_0	0.189097	-0.0829525	3	3	pseudo_transcript_0	0.0988711	-0.144148	1	1	pseudo_transcript_0	0.0826719	0.172486	5	5	pseudo_transcript_0	0.0219686	0.153055	3	3	pseudo_transcript_0	0.0196901	0.175378	2	2	pseudo_transcript_0	0.650096	0.12536	5	5	pseudo_transcript_0	0.468505	1.00553	6	6	pseudo_transcript_0	0.837183	0.149616	4	4
pseudo_18753	pseudo_transcript_0	0.0918524	0.101227	5	5	pseudo_transcript_0	0.171179	0.057395	3	3	pseudo_transcript_0	0.0945407	0.077422	2	2	pseudo_transcript_0	0.122209	-0.123581	5	5	pseudo_transcript_0	0.0285613	-0.156609	4	4	pseudo_transcript_1	0.0177928	0.174907	2	2	pseudo_transcript_1	0.0572493	1.92958	2	2	pseudo_transcript_1	0.118141	0.939114	2	2	pseudo_transcript_1	0.0307751	1.43435	2	2
ATRAID	P1P2	0.410723	-0.0438466	5	5	P1P2	0.186188	-0.0436009	6	6	P1P2	0.77418	-0.0156341	3	3	P1P2	0.073071	0.158917	7	7	P1P2	0.00214697	0.255451	6	6	P1P2	0.0170964	0.174735	4	4	P1P2	0.629636	0.936524	6	6	P1P2	0.0181079	2.35997	5	5	P1P2	0.0442514	1.26312	3	3
pseudo_15168	pseudo_transcript_0	0.610969	0.0349932	5	5	pseudo_transcript_0	0.57251	0.0358797	4	4	pseudo_transcript_0	0.232178	0.0623167	3	3	pseudo_transcript_0	0.230225	0.12811	5	5	pseudo_transcript_0	0.146391	0.104386	2	2	pseudo_transcript_0	0.0194709	0.174705	2	2	pseudo_transcript_0	0.568682	0.705453	6	6	pseudo_transcript_0	0.168824	1.2445	1	1	pseudo_transcript_0	0.153926	1.01968	1	1
CWF19L2	P1P2	0.584547	0.0380917	2	2	P1P2	0.62746	-0.0329748	4	4	P1P2	0.779786	-0.00748236	1	1	P1P2	0.15362	0.0853361	3	3	P1P2	0.263489	0.0720051	3	3	P1P2	0.0937874	0.17447	1	1	P1P2	0.503272	0.254634	3	3	P1P2	0.56165	0.349669	4	4	P1P2	0.505104	0.302363	2	2
HSBP1	P1P2	0.441824	-0.0855464	2	2	P1P2	0.955344	-0.0565282	4	4	P1P2	0.0845654	-0.24784	1	1	P1P2	0.0813609	-0.0935073	3	3	P1P2	0.0150905	0.258001	6	6	P1P2	0.0937874	0.174447	1	1	P1P2	0.90923	0.340055	4	4	P1P2	0.972989	-0.140627	3	3
DNM2	P1P2	0.0427051	-0.144105	2	2	P1P2	0.381672	-0.0683475	1	1	P1P2	0.106913	-0.129791	1	1	P1P2	0.14436	0.0948109	2	2	P1P2	0.177961	0.140044	3	3	P1P2	0.0937874	0.174398	1	1	P1P2	0.0830871	-1.01617	4	4	P1P2	0.572014	0.149148	3	3	P1P2	0.625017	0.208003	2	2
TNFRSF18	P1P2	0.26108	-0.0873382	1	1	P1P2	0.726972	-0.0231783	4	4	P1P2	0.371718	-0.042097	1	1	P1P2	0.0359521	0.158298	2	2	P1P2	0.404455	0.0712856	3	3	P1P2	0.0937874	0.174346	1	1	P1P2	0.292623	0.773194	1	1	P1P2	0.859646	0.446682	3	3
pseudo_5849	pseudo_transcript_0	0.415856	0.0938147	6	6	pseudo_transcript_0	0.894308	0.0010926	4	4	pseudo_transcript_0	0.160014	0.0624721	2	2	pseudo_transcript_0	0.287893	0.029382	5	5	pseudo_transcript_0	0.278146	0.0941002	3	3	pseudo_transcript_0	0.0940781	0.174275	1	1	pseudo_transcript_0	0.0884427	2.14727	5	5	pseudo_transcript_0	0.143451	0.865106	2	2	pseudo_transcript_0	0.0185279	1.69873	2	2
IPP	P1P2	0.496014	-0.0401875	5	5	P1P2	0.48831	-0.0236411	6	6	P1P2	0.124914	-0.0561589	4	4	P1P2	0.977348	0.0175352	4	4	P1P2	0.216522	0.0857931	3	3	P1P2	0.0943696	0.174215	1	1	P1P2	0.51947	0.59843	5	5	P1P2	0.0720025	0.975392	3	3	P1P2	0.293447	0.630831	1	1
pseudo_17409	pseudo_transcript_0	0.46934	-0.0674138	4	4	pseudo_transcript_0	0.249915	0.0687079	2	2	pseudo_transcript_0	0.333195	-0.048945	1	1	pseudo_transcript_0	0.450833	0.0872706	4	4	pseudo_transcript_0	0.25558	-0.0794588	3	3	pseudo_transcript_0	0.0946617	0.174102	1	1	pseudo_transcript_0	0.361304	0.717946	6	6	pseudo_transcript_0	0.103863	1.79114	1	1	pseudo_transcript_0	0.144772	1.08701	1	1
pseudo_2197	pseudo_transcript_0	0.925119	0.00377275	4	4	pseudo_transcript_0	0.0389593	0.0538261	5	5	pseudo_transcript_0	0.742149	0.0432215	4	4	pseudo_transcript_0	0.300494	0.0243718	6	6	pseudo_transcript_0	0.580766	-0.0503767	2	2	pseudo_transcript_0	0.0946617	0.174102	1	1	pseudo_transcript_0	0.737496	-0.648696	6	6	pseudo_transcript_0	0.703956	0.183092	3	3	pseudo_transcript_0	0.778042	-0.0405895	3	3
pseudo_7119	pseudo_transcript_0	0.296911	-0.078374	3	3	pseudo_transcript_0	0.804271	0.0145952	2	2	pseudo_transcript_0	0.333195	-0.048945	1	1	pseudo_transcript_0	0.0448853	0.150722	3	3	pseudo_transcript_0	0.689138	0.00537262	4	4	pseudo_transcript_0	0.0946617	0.174102	1	1	pseudo_transcript_0	0.0552054	1.03616	4	4	pseudo_transcript_0	0.528917	0.567117	2	2	pseudo_transcript_0	0.144772	1.08701	1	1
MRPL51	P1P2	0.115048	-0.10321	4	4	P1P2	0.0147442	-0.1481	4	4	P1P2	0.0940357	-0.0914359	2	2	P1P2	0.0453052	0.136774	2	2	P1P2	0.0973853	0.154	5	5	P1P2	0.0204744	0.17396	2	2	P1P2	0.296725	-0.859475	5	5	P1P2	0.389671	-0.622191	5	5	P1P2	0.4197	-0.664219	2	2
FXYD7	P1P2	0.0211345	-0.121511	3	3	P1P2	0.527661	-0.0408983	3	3	P1P2	0.126337	-0.112965	1	1	P1P2	0.00499898	0.179722	6	6	P1P2	0.0692714	0.170228	2	2	P1P2	0.0949546	0.173647	1	1	P1P2	0.984017	0.0172553	5	5	P1P2	0.279015	0.903616	1	1	P1P2	0.433703	0.442139	1	1
CSNK1E	P1P2	0.962716	-0.00502562	4	4	P1P2	0.0916719	-0.161857	5	5	P1P2	0.214676	-0.0296963	4	4	P1P2	0.457514	0.0408018	2	2	P1P2	0.879641	0.0953754	7	7	P1P2	0.0949546	0.173413	1	1	P1P2	0.183683	0.527505	3	3	P1P2	0.373824	-1.06952	5	5	P1P2	0.689239	-0.385481	2	2
pseudo_14252	pseudo_transcript_0	0.140189	-0.0602004	6	6	pseudo_transcript_0	0.716026	0.0224552	1	1						pseudo_transcript_0	0.0175066	0.0918497	7	7	pseudo_transcript_0	0.0356978	0.210901	7	7	pseudo_transcript_0	0.00430409	0.173323	5	5	pseudo_transcript_0	0.262334	0.873993	6	6
KCTD8	P1P2	0.851626	0.0205107	7	7	P1P2	0.423783	0.0359516	4	4	P1P2	0.335232	0.0452919	2	2	P1P2	0.6894	0.0829882	7	7	P1P2	0.586912	0.0333784	3	3	P1P2	0.0949546	0.173107	1	1	P1P2	0.483001	0.953894	4	4	P1P2	0.93021	0.036534	2	2
pseudo_2111	pseudo_transcript_1	0.131534	-0.144175	1	1	pseudo_transcript_0	0.480908	-0.0524031	8	8	pseudo_transcript_0	0.936952	0.023742	6	6	pseudo_transcript_1	0.101185	0.203985	1	1	pseudo_transcript_1	0.208213	0.142152	1	1	pseudo_transcript_1	0.0952482	0.173069	1	1	pseudo_transcript_0	0.15148	-1.46001	8	8	pseudo_transcript_0	0.23594	-1.83987	5	5	pseudo_transcript_0	0.105084	-1.36061	5	5
pseudo_3927	pseudo_transcript_0	0.770889	-0.0235258	3	3	pseudo_transcript_0	0.706422	0.0136139	3	3	pseudo_transcript_0	0.688243	0.0286371	1	1	pseudo_transcript_0	0.0178912	0.23789	2	2	pseudo_transcript_0	0.730508	-0.00428905	5	5	pseudo_transcript_0	0.0952482	0.173069	1	1	pseudo_transcript_0	0.120836	1.41774	2	2	pseudo_transcript_0	0.150668	-0.988199	3	3	pseudo_transcript_0	0.134978	1.17611	1	1
pseudo_4262	pseudo_transcript_0	0.131534	-0.144175	1	1	pseudo_transcript_0	0.499061	0.0410843	3	3						pseudo_transcript_0	0.101185	0.203985	1	1	pseudo_transcript_0	0.56558	-0.0746636	4	4	pseudo_transcript_0	0.0952482	0.173069	1	1	pseudo_transcript_0	0.895825	-0.167439	4	4	pseudo_transcript_0	0.401903	-0.647985	3	3	pseudo_transcript_0	0.665742	-0.231949	1	1
pseudo_8847	pseudo_transcript_0	0.377944	-0.0275116	4	4	pseudo_transcript_0	0.890053	-0.0145047	3	3						pseudo_transcript_0	0.0272132	0.130661	4	4	pseudo_transcript_0	0.17067	0.0941133	3	3	pseudo_transcript_0	0.0952482	0.173069	1	1	pseudo_transcript_0	0.6541	0.191728	4	4	pseudo_transcript_0	0.921479	0.0361824	3	3	pseudo_transcript_0	0.51502	-0.357012	1	1
2018-09-05	P2	0.265278	0.0225307	7	7	P1	0.126003	-0.0645675	5	5	P2	0.732831	0.0194554	3	3	P2	0.00590997	0.191247	3	3	P2	0.128743	0.126798	4	4	P2	0.00468092	0.172962	3	3	P2	0.258417	0.392688	4	4	P1	0.185401	0.6695	3	3	P2	0.211886	0.541145	2	2
DACT2	P1P2	1	0.0746981	6	6	P1P2	0.0817448	-0.180243	3	3	P1P2	0.330109	-0.0675119	2	2	P1P2	0.97946	0.0453496	6	6	P1P2	0.127814	0.178622	4	4	P1P2	0.0244162	0.172807	2	2	P1P2	0.373832	0.802543	6	6	P1P2	0.20084	-0.896325	3	3	P1P2	0.210765	-0.426765	3	3
PAFAH1B3	P1P2	0.225774	0.039956	6	6	P1P2	0.232554	0.0203053	5	5	P1P2	0.539475	0.0147532	4	4	P1P2	0.466942	0.141734	8	8	P1P2	0.189718	0.190992	8	8	P1P2	0.0988186	0.172469	7	7	P1P2	0.257181	0.554851	6	6	P1P2	0.141987	5.83084e-05	6	6	P1P2	0.154877	0.148938	5	5
TUBGCP5	P1P2	0.0165085	-0.157773	3	3	P1P2	0.376313	0.0607969	1	1	P1P2	0.870203	-0.00183578	1	1	P1P2	0.0247412	0.182212	2	2	P1P2	0.203892	0.145456	1	1	P1P2	0.0955425	0.172402	1	1	P1P2	0.81383	-0.315408	4	4	P1P2	0.463612	0.740405	2	2	P1P2	0.714746	0.390397	2	2
pseudo_13328	pseudo_transcript_0	0.214917	0.0702892	5	5	pseudo_transcript_0	0.399728	0.0347892	3	3	pseudo_transcript_0	0.0945407	0.0747046	2	2	pseudo_transcript_0	0.15642	0.137443	1	1	pseudo_transcript_0	0.191499	0.0529943	6	6	pseudo_transcript_0	0.0958375	0.172057	1	1	pseudo_transcript_0	0.165402	0.722948	2	2	pseudo_transcript_0	0.131772	0.897763	3	3
pseudo_18322	pseudo_transcript_0	0.178374	-0.0643351	3	3	pseudo_transcript_0	0.162232	-0.0945607	2	2	pseudo_transcript_0	0.382506	-0.0403219	1	1	pseudo_transcript_0	0.703653	0.0270845	4	4	pseudo_transcript_0	0.0627168	0.157188	2	2	pseudo_transcript_0	0.0958375	0.172057	1	1	pseudo_transcript_0	0.171743	-1.05584	4	4
pseudo_4459	pseudo_transcript_0	0.444754	-0.0399305	2	2	pseudo_transcript_0	0.269847	-0.0931716	1	1						pseudo_transcript_0	0.0305784	0.170945	2	2	pseudo_transcript_0	0.236853	0.0896301	3	3	pseudo_transcript_0	0.0958375	0.172057	1	1	pseudo_transcript_0	0.0586417	0.99679	4	4	pseudo_transcript_0	0.650853	0.351302	1	1
pseudo_16471	pseudo_transcript_0	0.753682	-0.0186133	4	4	pseudo_transcript_0	0.574666	-0.0318474	3	3	pseudo_transcript_0	0.427543	0.0491236	1	1	pseudo_transcript_0	0.113657	0.107487	4	4	pseudo_transcript_0	0.113861	0.146134	5	5	pseudo_transcript_0	0.0668504	0.172001	4	4	pseudo_transcript_0	0.583147	-0.446746	2	2	pseudo_transcript_0	0.518583	0.4464	4	4
OR56A5	NM_001146033	0.753682	0.0544689	4	4	NM_001146033	0.790963	-0.0529089	3	3	NM_001146033	0.86046	-0.0297862	2	2	NM_001146033	0.16377	0.0931436	3	3	NM_001146033	0.298787	0.061615	3	3	NM_001146033	0.0961333	0.171604	1	1	NM_001146033	0.148201	0.855459	5	5	NM_001146033	0.257046	0.957595	1	1	NM_001146033	0.357162	0.521395	1	1
IL5	P2	0.411221	0.0456169	6	6	P1	0.338902	-0.0520779	2	2	P1	0.272815	-0.0586654	1	1	P2	0.276822	-0.0702733	9	9	P1	0.0325626	0.171722	3	3	P1	0.0961333	0.171588	1	1	P2	0.421217	-1.0387	7	7	P1	0.148425	1.36609	1	1	P2	0.186815	-0.612862	2	2
CD46	P1P2	0.810259	0.0188224	3	3	P1P2	0.7708	-0.0188824	2	2	P1P2	0.911115	0.0114608	2	2	P1P2	0.708149	0.0219623	2	2	P1P2	0.232647	0.199689	5	5	P1P2	0.0218822	0.170899	2	2	P1P2	0.508146	-0.462691	1	1	P1P2	0.748326	0.250714	1	1
pseudo_11015	pseudo_transcript_0	0.399763	-0.081979	3	3	pseudo_transcript_0	0.836277	0.0264037	5	5	pseudo_transcript_0	0.348669	-0.0504079	3	3	pseudo_transcript_0	0.234797	0.122668	5	5	pseudo_transcript_0	0.963319	0.0298846	3	3	pseudo_transcript_0	0.0186153	0.170829	2	2	pseudo_transcript_0	0.967433	0.0518629	3	3	pseudo_transcript_0	0.335014	-0.521398	4	4	pseudo_transcript_0	0.878113	-0.0540594	2	2
SERPINI2	P1P2	0.597071	-0.00729278	4	4	P1P2	0.110632	-0.113228	4	4	P1P2	0.294078	-0.0569198	3	3	P1P2	0.0923022	0.102433	4	4	P1P2	0.00695623	0.278781	3	3	P1P2	0.0112158	0.170707	3	3	P1P2	0.508847	0.473851	5	5	P1P2	0.123269	0.595285	4	4	P1P2	0.0340648	0.979484	3	3
RAB11FIP4	ENST00000325874.8	0.0499018	0.0903727	4	4	ENST00000325874.8	0.253773	-0.107698	2	2	ENST00000325874.8	0.700311	0.0272954	1	1	ENST00000325874.8	0.897793	0.00148867	4	4	ENST00000325874.8	0.403562	0.0642128	2	2	ENST00000325874.8	0.0961333	0.170509	1	1	ENST00000325874.8	0.659587	0.175807	3	3	ENST00000325874.8	0.297969	-1.05234	1	1
pseudo_6351	pseudo_transcript_0	0.455444	-0.0947816	8	8	pseudo_transcript_0	0.385297	-0.0775083	7	7	pseudo_transcript_0	0.606364	-0.0570738	6	6	pseudo_transcript_0	0.431435	0.0664135	6	6	pseudo_transcript_0	0.0302146	0.25526	8	8	pseudo_transcript_0	0.0764847	0.170461	5	5	pseudo_transcript_0	0.967307	0.0218813	7	7	pseudo_transcript_0	0.0999179	1.02879	7	7	pseudo_transcript_0	0.417447	0.312745	4	4
LSM2	P1P2	0.23763	-0.0593418	3	3	P1P2	0.192635	-0.0761842	2	2	P1P2	0.166523	-0.0898981	1	1	P1P2	0.0835861	0.35619	1	1	P1P2	0.106229	-0.118006	4	4	P1P2	0.0961333	0.170027	1	1	P1P2	0.184893	0.955347	2	2	P1P2	0.983083	-0.0855999	2	2
ZNF117	P1P2	0.285159	0.0952419	8	8	P1P2	0.411182	-0.0961794	9	9	P1P2	0.778067	0.0150032	7	7	P1P2	0.213784	0.0845342	9	9	P1P2	0.437114	0.184124	10	10	P1P2	0.214662	0.170025	9	9	P1P2	0.255605	1.04588	8	8	P1P2	0.406752	1.21204	9	9	P1P2	0.382173	0.634641	7	7
AMOTL2	P1P2	0.189876	-0.0962095	2	2	P1P2	0.180699	-0.12515	1	1	P1P2	0.0963004	-0.148644	1	1	P1P2	0.120394	0.147641	4	4	P1P2	0.828458	0.0353262	4	4	P1P2	0.0961333	0.16985	1	1	P1P2	0.13725	1.09635	4	4	P1P2	0.311878	-0.621391	3	3	P1P2	0.687434	-0.0939939	3	3
pseudo_10174	pseudo_transcript_0	0.253268	0.0832103	3	3	pseudo_transcript_0	0.108459	0.0796137	5	5	pseudo_transcript_0	0.156203	0.091035	1	1	pseudo_transcript_0	0.509541	0.0300085	3	3	pseudo_transcript_0	0.546631	-0.0168016	4	4	pseudo_transcript_0	0.0970251	0.169331	1	1	pseudo_transcript_0	0.761088	0.0663836	5	5	pseudo_transcript_0	0.578685	-0.327917	3	3	pseudo_transcript_0	0.237039	-0.785521	1	1
pseudo_880	pseudo_transcript_1	0.489734	0.0660134	4	4	pseudo_transcript_0	0.251839	-0.0641494	2	2	pseudo_transcript_1	0.281684	0.0479283	2	2	pseudo_transcript_1	0.129177	0.0502818	5	5	pseudo_transcript_0	0.13681	0.153555	2	2	pseudo_transcript_0	0.0970251	0.169331	1	1	pseudo_transcript_1	0.524604	-0.0233582	4	4	pseudo_transcript_1	0.37539	-0.818594	5	5	pseudo_transcript_1	0.563246	-0.326211	1	1
PDE1A	ENST00000435564.1	0.14558	-0.134366	1	1	ENST00000331935.6	0.277671	0.0670799	8	8	ENST00000435564.1	0.0948556	-0.155203	1	1	ENST00000331935.6	0.159282	0.107461	8	8	ENST00000331935.6	0.222897	0.208333	8	8	ENST00000331935.6	0.0911072	0.169166	8	8	ENST00000435564.1	0.194924	-0.53653	3	3	ENST00000331935.6	0.0182256	1.8396	9	9	ENST00000331935.6	0.0456779	1.00059	7	7
INPP4B	P1	0.181919	-0.0713785	2	2	P1	0.0652516	-0.125085	2	2	P2	0.676254	-0.0137052	1	1	P1	0.524901	0.0347327	2	2	P1	0.43495	0.09362	3	3	P1	0.0973238	0.169149	1	1	P2	0.215052	-0.627064	3	3	P1	0.0781105	-1.48105	2	2	P1	0.211537	-0.867081	1	1
pseudo_4031	pseudo_transcript_0	0.0885288	-0.117393	4	4	pseudo_transcript_0	0.9906	-0.0180433	5	5	pseudo_transcript_0	0.340502	-0.0478643	1	1	pseudo_transcript_0	0.0203376	0.234357	7	7	pseudo_transcript_0	0.473067	-0.0583461	6	6	pseudo_transcript_0	0.0827383	0.168907	4	4	pseudo_transcript_0	0.165395	0.804631	5	5	pseudo_transcript_0	0.708042	-0.655984	5	5	pseudo_transcript_0	0.231504	0.504823	3	3
STAMBP	P1P2	0.0678345	-0.0680822	6	6	P1P2	0.700568	-0.027161	2	2	P1P2	0.181465	-0.0847493	1	1	P1P2	0.0914758	0.133841	3	3	P1P2	0.0430735	0.142702	3	3	P1P2	0.0973238	0.16842	1	1	P1P2	0.151537	-0.281048	6	6	P1P2	0.577656	0.423402	3	3	P1P2	0.857811	0.0735012	2	2
AGPAT4	P1P2	0.641335	-0.0222261	2	2	P1P2	0.58017	-0.0292557	2	2	P1P2	0.485691	-0.0290283	1	1	P1P2	0.831358	0.043181	6	6	P1P2	0.3488	0.0919499	1	1	P1P2	0.0973238	0.168377	1	1	P1P2	0.0857535	-1.24	2	2
E4F1	P1P2	0.343206	-0.057077	2	2	P1P2	0.842175	-0.00541887	3	3	P1P2	0.884517	0.0142873	1	1	P1P2	0.228119	0.102963	1	1	P1P2	0.999096	-0.00308522	6	6	P1P2	0.0973238	0.168228	1	1	P1P2	0.527405	-0.268208	3	3	P1P2	0.0292352	1.56007	2	2
NDC80	P1P2	0.986526	0.00259421	2	2	P1P2	0.476363	0.0483532	1	1	P1P2	0.566158	-0.0223469	1	1	P1P2	0.120751	0.16978	1	1	P1P2	0.167049	0.16643	1	1	P1P2	0.0973238	0.168105	1	1	P1P2	0.450006	0.505246	1	1	P1P2	0.0863271	2.11973	1	1	P1P2	0.114586	1.31249	1	1
pseudo_3201	pseudo_transcript_0	0.0523291	-0.095024	4	4	pseudo_transcript_0	0.498621	0.0309235	2	2	pseudo_transcript_0	0.477971	-0.0221307	2	2	pseudo_transcript_0	0.933908	0.0244149	4	4	pseudo_transcript_0	0.496369	0.0281561	3	3	pseudo_transcript_0	0.0976232	0.168039	1	1	pseudo_transcript_0	0.583681	0.743116	3	3	pseudo_transcript_0	0.284057	-1.00896	2	2
pseudo_4336	pseudo_transcript_0	0.787139	0.031452	4	4	pseudo_transcript_0	0.27934	-0.0705247	3	3	pseudo_transcript_0	0.280538	-0.0410261	2	2	pseudo_transcript_0	0.440247	0.050041	5	5	pseudo_transcript_0	0.268314	0.0776281	3	3	pseudo_transcript_0	0.0976232	0.168039	1	1	pseudo_transcript_0	0.303997	0.546559	5	5
pseudo_9446	pseudo_transcript_0	0.0390407	-0.100187	3	3	pseudo_transcript_0	0.116299	0.13947	1	1						pseudo_transcript_0	0.104998	0.104443	2	2	pseudo_transcript_0	0.293345	0.0962612	2	2	pseudo_transcript_0	0.0976232	0.168039	1	1	pseudo_transcript_0	0.652314	-0.664034	6	6	pseudo_transcript_0	0.77516	-0.261763	1	1	pseudo_transcript_0	0.377641	-0.54151	1	1
pseudo_14670	pseudo_transcript_0	0.450061	-0.0307124	7	7	pseudo_transcript_0	0.231404	-0.0762434	5	5	pseudo_transcript_0	0.0302264	-0.111438	4	4	pseudo_transcript_0	0.242668	0.0124584	5	5	pseudo_transcript_0	0.299534	0.0834833	3	3	pseudo_transcript_0	0.0193621	0.167926	2	2	pseudo_transcript_0	0.795566	0.305763	5	5	pseudo_transcript_0	0.950748	-0.0575394	2	2	pseudo_transcript_0	0.395436	-0.522431	1	1
MIS18A	P1P2	0.618684	0.037658	1	1	P1P2	0.704602	-0.0223602	2	2	P1P2	0.697623	0.0276424	1	1	P1P2	0.411426	0.0456395	2	2	P1P2	0.0962428	0.164662	2	2	P1P2	0.0979234	0.167338	1	1	P1P2	0.934006	-0.163426	3	3	P1P2	0.157845	-1.23996	2	2	P1P2	0.213024	-0.850151	1	1
ISLR	P1P2	0.0886514	0.100359	7	7	P1P2	0.435975	-0.0437143	6	6	P1P2	0.775484	0.0338545	5	5	P1P2	0.434889	-0.00324177	6	6	P1P2	0.0259788	0.268314	4	4	P1P2	0.00971324	0.167304	4	4	P1P2	0.507991	1.15368	5	5	P1P2	0.235976	0.772958	3	3	P1P2	0.712608	0.314527	2	2
TMC2	P1P2	0.658047	-0.0220455	2	2	P1P2	0.669173	-0.0264081	2	2	P1P2	0.561253	-0.02269	1	1	P1P2	0.417943	0.0483241	3	3	P1P2	0.649051	0.0371257	3	3	P1P2	0.0979234	0.167023	1	1	P1P2	0.107731	-1.6232	1	1	P1P2	0.149083	0.845022	2	2
LAIR1	P1P2	0.24061	-0.06224	3	3	P1P2	0.267943	0.0798137	1	1						P1P2	0.625471	0.0492545	4	4	P1P2	0.988179	-0.0109764	4	4	P1P2	0.0979234	0.166933	1	1	P1P2	0.984401	-0.00864103	3	3	P1P2	0.727662	0.266718	1	1
pseudo_14875	pseudo_transcript_0	0.59328	-0.0277183	2	2	pseudo_transcript_0	0.104162	-0.130861	4	4	pseudo_transcript_0	0.185653	-0.0822497	1	1	pseudo_transcript_0	0.583068	-0.0334482	5	5	pseudo_transcript_0	0.0353541	0.171859	3	3	pseudo_transcript_0	0.0982243	0.166568	1	1	pseudo_transcript_0	0.479021	-0.305371	3	3	pseudo_transcript_0	0.557654	-0.39361	2	2	pseudo_transcript_0	0.847213	-0.0590548	1	1
pseudo_3288	pseudo_transcript_0	0.748776	-0.0195474	4	4	pseudo_transcript_0	0.307719	-0.0719632	4	4	pseudo_transcript_0	0.528684	-0.0175394	2	2	pseudo_transcript_0	0.651229	-0.0335238	4	4	pseudo_transcript_0	0.27699	0.0852927	4	4	pseudo_transcript_0	0.0982243	0.166568	1	1	pseudo_transcript_0	0.869108	-0.123779	4	4	pseudo_transcript_0	0.737193	0.17804	2	2	pseudo_transcript_0	0.96456	0.0399965	2	2
MASP2	P1P2	0.945759	0.0126198	5	5	P1P2	0.531416	-0.0792869	4	4	P1P2	0.621423	-0.0189854	1	1	P1P2	0.48509	0.0611958	4	4	P1P2	0.00997918	0.229951	4	4	P1P2	0.0196901	0.166001	2	2	P1P2	0.235484	0.684971	2	2	P1P2	0.746847	0.213233	3	3	P1P2	0.110905	1.33575	1	1
ARRDC3	P1P2	0.413765	0.0946896	5	5	P1P2	0.382478	-0.0639494	9	9	P1P2	0.648462	0.0395129	4	4	P1P2	0.0387251	0.225034	10	10	P1P2	0.0150118	0.196223	9	9	P1P2	0.00111078	0.165962	9	9	P1P2	0.00782677	1.43111	5	5	P1P2	0.0982505	1.2272	8	8	P1P2	0.0434297	1.09474	4	4
pseudo_14377	pseudo_transcript_0	0.122084	-0.130827	5	5	pseudo_transcript_0	0.978247	-0.0117917	3	3	pseudo_transcript_0	0.126461	-0.0597709	2	2	pseudo_transcript_0	0.243156	0.0810618	5	5	pseudo_transcript_0	0.437397	0.0734894	1	1	pseudo_transcript_0	0.0988283	0.165825	1	1	pseudo_transcript_0	0.392648	0.350685	4	4	pseudo_transcript_0	0.091467	2.01397	1	1	pseudo_transcript_0	0.149295	1.04183	1	1
pseudo_6008	pseudo_transcript_0	0.21426	-0.0757874	5	5	pseudo_transcript_0	0.172173	0.0730735	3	3	pseudo_transcript_0	0.548505	-0.0128985	3	3	pseudo_transcript_0	0.949776	0.0413096	3	3	pseudo_transcript_0	0.986332	-0.0252446	4	4	pseudo_transcript_0	0.0988283	0.165825	1	1	pseudo_transcript_0	0.206043	-0.591841	3	3	pseudo_transcript_0	0.122766	1.19809	2	2	pseudo_transcript_0	0.149295	1.04183	1	1
PDLIM1	P1P2	0.770889	-0.014765	3	3	P1P2	0.0248067	-0.188356	2	2	P1P2	0.0934282	-0.160851	1	1	P1P2	0.262893	0.1157	5	5	P1P2	0.292368	0.116529	3	3	P1P2	0.0322254	0.165622	2	2	P1P2	0.394857	0.487056	4	4	P1P2	0.954996	-0.241508	3	3	P1P2	0.900764	0.0476795	2	2
NSUN2	P1P2	0.995635	0.00208553	4	4	P1P2	0.165453	0.110638	1	1	P1P2	0.383496	0.0551224	1	1	P1P2	0.164651	0.104118	2	2	P1P2	0.551881	-0.0271006	4	4	P1P2	0.0991315	0.165541	1	1	P1P2	0.818078	0.176002	3	3
pseudo_2983	pseudo_transcript_0	0.579388	-0.0225466	3	3	pseudo_transcript_0	0.138877	-0.0834899	5	5	pseudo_transcript_0	0.378042	-0.0396482	2	2	pseudo_transcript_0	0.338922	0.0889537	6	6	pseudo_transcript_0	0.0925494	0.23197	7	7	pseudo_transcript_0	0.0574613	0.164913	5	5	pseudo_transcript_0	0.709853	-0.124596	3	3	pseudo_transcript_0	0.202882	1.69789	6	6	pseudo_transcript_0	0.588148	0.350898	3	3
pseudo_10338	pseudo_transcript_0	0.279854	-0.0394184	6	6	pseudo_transcript_0	0.309426	-0.0741881	6	6	pseudo_transcript_0	0.71221	-0.0136763	4	4	pseudo_transcript_0	0.767413	0.0340543	8	8	pseudo_transcript_0	0.00867028	0.276902	8	8	pseudo_transcript_0	0.0297396	0.164823	6	6	pseudo_transcript_0	0.264068	-0.703014	6	6	pseudo_transcript_0	0.0329914	0.104663	7	7	pseudo_transcript_0	0.246419	0.486044	4	4
MESDC2	P1P2	0.208428	-0.0625336	3	3	P1P2	0.488766	0.0319013	4	4	P1P2	0.763121	-0.00884562	1	1	P1P2	0.0101236	0.169876	3	3	P1P2	0.267621	0.082743	3	3	P1P2	0.09974	0.164624	1	1	P1P2	0.527875	0.412511	5	5	P1P2	0.557034	0.459621	2	2
pseudo_5375	pseudo_transcript_0	0.57804	-0.0783207	7	7	pseudo_transcript_0	0.227788	-0.118913	7	7	pseudo_transcript_0	0.30276	-0.0986169	4	4	pseudo_transcript_0	0.129477	0.136747	4	4	pseudo_transcript_0	0.860707	0.00340435	4	4	pseudo_transcript_0	0.100045	0.164395	1	1	pseudo_transcript_0	0.171089	-0.833836	6	6	pseudo_transcript_0	0.53861	-0.489239	4	4	pseudo_transcript_0	0.406967	-0.358898	3	3
TBC1D8B	P1P2	0.050027	0.136095	2	2	P1P2	0.125906	-0.102224	2	2						P1P2	0.210523	0.108738	1	1	P1P2	0.0848423	0.163596	4	4	P1P2	0.100351	0.164336	1	1	P1P2	0.199923	-0.600605	3	3	P1P2	0.757445	-0.294001	2	2
pseudo_14594	pseudo_transcript_0	0.554336	0.00053473	4	4	pseudo_transcript_0	0.935605	-0.00454088	2	2	pseudo_transcript_0	0.353535	-0.0446885	1	1	pseudo_transcript_0	0.302675	0.0706081	3	3	pseudo_transcript_0	0.104456	0.234419	1	1	pseudo_transcript_0	0.100658	0.164257	1	1	pseudo_transcript_0	0.140526	0.747377	3	3	pseudo_transcript_0	0.280343	-0.693059	2	2	pseudo_transcript_0	0.525549	0.372763	1	1
pseudo_14828	pseudo_transcript_1	0.324074	-0.0571671	4	4	pseudo_transcript_0	0.659354	-0.0491111	5	5	pseudo_transcript_1	0.594753	0.033986	1	1	pseudo_transcript_1	0.0674391	0.0878136	3	3	pseudo_transcript_1	0.0405939	0.166539	5	5	pseudo_transcript_1	0.100658	0.164257	1	1	pseudo_transcript_0	0.335148	0.943279	5	5	pseudo_transcript_1	0.262666	0.645308	2	2	pseudo_transcript_0	0.935679	0.0395379	3	3
pseudo_181	pseudo_transcript_0	0.407947	-0.0260864	5	5	pseudo_transcript_0	0.849349	-0.02765	4	4	pseudo_transcript_0	0.179963	-0.0629486	2	2	pseudo_transcript_0	0.982982	0.0328311	8	8	pseudo_transcript_0	0.400548	0.0636368	3	3	pseudo_transcript_0	0.100658	0.164257	1	1	pseudo_transcript_0	0.954319	-0.416166	6	6	pseudo_transcript_0	0.166414	1.25437	1	1	pseudo_transcript_0	0.20494	0.811173	1	1
pseudo_7016	pseudo_transcript_0	0.645356	-0.0106937	5	5	pseudo_transcript_0	0.98334	0.000789541	1	1						pseudo_transcript_0	0.181882	0.0746683	4	4	pseudo_transcript_0	0.358803	0.0738487	3	3	pseudo_transcript_0	0.100658	0.164257	1	1	pseudo_transcript_0	0.363016	0.395113	6	6	pseudo_transcript_0	0.809852	0.0981534	2	2	pseudo_transcript_0	0.755782	-0.110618	2	2
pseudo_8798	pseudo_transcript_0	0.0763995	-0.0768932	5	5	pseudo_transcript_0	0.461989	-0.059302	3	3	pseudo_transcript_0	0.348669	-0.0431104	3	3	pseudo_transcript_0	0.231598	0.0562757	3	3	pseudo_transcript_0	0.349361	0.0742801	3	3	pseudo_transcript_0	0.100658	0.164257	1	1	pseudo_transcript_0	0.339379	0.875507	4	4
pseudo_5089	pseudo_transcript_0	0.105765	-0.135152	6	6	pseudo_transcript_0	0.0650143	-0.151807	6	6	pseudo_transcript_0	0.0169282	-0.143479	4	4	pseudo_transcript_0	0.0919768	0.101036	3	3	pseudo_transcript_0	0.305695	0.174943	6	6	pseudo_transcript_0	0.0262681	0.164189	3	3	pseudo_transcript_0	0.47272	0.368592	5	5	pseudo_transcript_0	0.535085	0.0333389	5	5	pseudo_transcript_0	0.323643	0.513224	4	4
YBX3	P1P2	0.568043	-0.0246384	3	3	P1P2	0.867887	-0.0221572	4	4	P1P2	0.915186	0.0103398	2	2	P1P2	0.10175	0.20102	1	1	P1P2	0.109788	0.118243	2	2	P1P2	0.100966	0.164162	1	1	P1P2	0.747491	-0.391292	2	2	P1P2	0.481799	0.91636	2	2	P1P2	0.909848	0.262534	2	2
ESD	P1P2	0.676856	0.0514443	6	6	P1P2	0.0416865	-0.146386	5	5	P1P2	0.394001	-0.0441504	5	5	P1P2	0.609537	0.106505	9	9	P1P2	0.0316374	0.225752	7	7	P1P2	0.102021	0.164091	6	6	P1P2	0.49928	0.738953	6	6	P1P2	0.193538	0.789072	4	4	P1P2	0.44832	0.571728	4	4
FAM32A	P1P2	0.30062	-0.0534684	2	2	P1P2	0.269847	-0.0931716	1	1	P1P2	0.186257	-0.0821051	1	1	P1P2	0.11276	0.179687	1	1	P1P2	0.598274	0.0361544	4	4	P1P2	0.100966	0.163951	1	1	P1P2	0.84473	0.162737	2	2	P1P2	0.408698	-0.406981	3	3
BSCL2	P1	0.725525	-0.0230965	4	4	P1	0.14735	-0.0869712	3	3	P1	0.139021	-0.0781214	2	2	P2	0.0729638	-0.169407	6	6	P1	0.207744	0.0904642	2	2	P1	0.100966	0.163843	1	1	P2	0.618139	-0.337836	6	6	P1	0.246461	-0.629552	5	5	P1	0.63489	-0.1498	3	3
IREB2	P1P2	0.373511	-0.0650213	1	1	P1P2	0.25928	0.0533248	3	3	P1P2	0.255728	-0.0646805	1	1	P1P2	0.132164	0.15506	1	1	P1P2	0.440274	0.0707015	2	2	P1P2	0.100966	0.163671	1	1	P1P2	0.367638	0.645276	1	1	P1P2	0.106273	0.96323	2	2	P1P2	0.204216	0.812862	1	1
GPS1	P1P2	0.55367	-0.0040818	4	4	P1P2	0.648635	-0.0387535	4	4	P1P2	0.854416	0.0143106	2	2	P1P2	0.125776	0.0800335	3	3	P1P2	0.008851	0.165868	4	4	P1P2	0.100966	0.163557	1	1	P1P2	0.783073	-0.161404	4	4	P1P2	0.656539	-0.338231	3	3	P1P2	0.301416	-0.413153	2	2
UGT3A2	P1P2	0.14724	-0.132223	1	1	P1P2	0.872042	0.00298606	3	3	P1P2	0.135595	-0.104143	1	1	P1P2	0.0227898	0.128348	3	3	P1P2	0.973038	-0.010412	4	4	P1P2	0.02648	0.163492	2	2	P1P2	0.981452	-0.0307709	2	2	P1P2	0.701165	0.328596	3	3	P1P2	0.169102	0.925917	1	1
FTCD	P2	0.421224	0.044728	2	2	P1	0.0858289	0.0696568	3	3	P1	0.606878	-0.0148745	2	2	P1	0.192904	0.130355	6	6	P2	0.608603	-0.00805932	4	4	P2	0.100966	0.163448	1	1	P2	0.0513854	1.038	3	3	P2	0.534317	-0.370194	4	4	P2	0.066776	0.974517	2	2
pseudo_12527	pseudo_transcript_1	0.258335	0.0559035	4	4	pseudo_transcript_0	0.304592	0.0407103	3	3	pseudo_transcript_1	0.974105	0.00556888	3	3	pseudo_transcript_0	0.297132	-0.0464163	5	5	pseudo_transcript_0	0.0266153	0.168294	3	3	pseudo_transcript_0	0.101274	0.163395	1	1	pseudo_transcript_0	0.617531	0.155985	4	4	pseudo_transcript_1	0.0237994	-1.52187	3	3	pseudo_transcript_1	0.0895883	-1.73777	1	1
GOLGA1	P1P2	0.210349	-0.0854947	5	5	P1P2	0.241513	-0.0803252	3	3	P1P2	0.0180395	-0.156668	2	2	P1P2	0.36006	0.0336069	5	5	P1P2	0.130192	0.19073	1	1	P1P2	0.101583	0.163306	1	1	P1P2	0.120385	-0.940644	6	6	P1P2	0.846935	0.134855	1	1	P1P2	0.855163	-0.0570627	1	1
EOGT	P1P2	0.25226	-0.0702183	2	2	P1P2	0.207066	-0.111601	1	1						P1P2	0.159558	0.0736411	3	3	P1P2	0.0942929	0.152444	2	2	P1P2	0.101583	0.163282	1	1	P1P2	0.482691	0.313518	4	4
pseudo_12294	pseudo_transcript_0	0.48786	-0.0365049	4	4	pseudo_transcript_1	0.826614	0.00183148	4	4	pseudo_transcript_0	0.259545	-0.0625951	1	1	pseudo_transcript_0	0.128909	0.0837973	4	4	pseudo_transcript_0	0.095459	0.189982	2	2	pseudo_transcript_0	0.101893	0.162679	1	1	pseudo_transcript_0	0.599415	0.221003	4	4	pseudo_transcript_0	0.723748	0.270687	1	1	pseudo_transcript_1	0.0983403	1.51789	1	1
pseudo_1972	pseudo_transcript_0	0.335158	0.0887283	6	6	pseudo_transcript_1	0.338998	-0.0760633	1	1	pseudo_transcript_0	0.314279	0.042198	3	3	pseudo_transcript_0	0.639892	0.0208645	6	6	pseudo_transcript_1	0.0742326	0.195912	5	5	pseudo_transcript_1	0.101893	0.162679	1	1	pseudo_transcript_0	0.450668	0.151865	7	7	pseudo_transcript_0	0.520695	0.382816	4	4	pseudo_transcript_0	0.490892	0.26734	3	3
pseudo_9870	pseudo_transcript_0	0.611642	-0.0246445	4	4	pseudo_transcript_0	0.480189	-0.0849167	4	4	pseudo_transcript_0	0.111303	-0.0832797	2	2	pseudo_transcript_0	0.910886	0.00556888	3	3	pseudo_transcript_0	0.342082	0.0996629	4	4	pseudo_transcript_0	0.101893	0.162679	1	1	pseudo_transcript_0	0.518316	-0.208408	5	5	pseudo_transcript_0	0.84254	0.0858934	3	3	pseudo_transcript_0	0.759412	0.180595	1	1
pseudo_15233	pseudo_transcript_0	0.340064	-0.0102354	6	6	pseudo_transcript_0	0.152009	-0.10977	3	3	pseudo_transcript_0	0.91315	0.0118239	2	2	pseudo_transcript_0	0.788385	-0.0528472	5	5	pseudo_transcript_0	0.0184481	0.220077	5	5	pseudo_transcript_0	0.00853179	0.162368	4	4	pseudo_transcript_0	0.913149	0.298691	5	5	pseudo_transcript_0	0.898764	-0.0833881	2	2	pseudo_transcript_0	0.230666	0.743034	1	1
CCT3	P1P2	0.619334	0.0283338	2	2	P1P2	0.0886841	-0.237112	1	1	P1P2	0.186257	-0.0809301	1	1	P1P2	0.559546	0.0322138	2	2	P1P2	0.19692	0.12896	3	3	P1P2	0.102204	0.162365	1	1	P1P2	0.293032	0.257405	5	5	P1P2	0.529577	0.500686	1	1	P1P2	0.293447	0.629812	1	1
KRTAP4-5	P1P2	0.119026	-0.0859901	3	3	P1P2	0.159619	-0.0964121	5	5						P1P2	0.374998	0.0704556	6	6	P1P2	0.111099	0.112545	7	7	P1P2	0.0292876	0.162276	5	5	P1P2	0.283773	-0.596439	3	3	P1P2	0.319858	0.0223805	5	5	P1P2	0.954714	0.00290036	1	1
TRIM73	ENST00000437796.1	0.775875	0.02999	7	7	ENST00000437796.1	0.0156184	-0.177951	8	8	ENST00000437796.1	0.301716	-0.0586965	6	6	ENST00000437796.1	0.0651031	0.107205	6	6	ENST00000437796.1	0.0355981	0.238163	6	6	ENST00000437796.1	0.00303554	0.162226	5	5	ENST00000437796.1	0.420223	0.483825	4	4	ENST00000447409.2	0.295109	0.995215	6	6	ENST00000437796.1	0.321287	0.424828	3	3
MMACHC	P1P2	0.914363	0.06002	6	6	P1P2	0.987352	-0.00431257	3	3	P1P2	0.712681	-0.00643079	2	2	P1P2	0.0503791	0.0557308	6	6	P1P2	0.130664	0.190066	1	1	P1P2	0.102204	0.162083	1	1	P1P2	0.0253721	1.11235	6	6
ELOVL5	P1P2	0.608566	-0.0341623	6	6	P1P2	0.704602	-0.024325	2	2	P1P2	0.921296	0.00274966	2	2	P1P2	0.245278	0.104999	3	3	P1P2	0.50441	0.0437135	2	2	P1P2	0.102204	0.162063	1	1	P1P2	0.828544	0.223897	4	4	P1P2	0.399957	-0.534164	2	2
AP4M1	P1P2	0.190076	-0.0425942	4	4	P1P2	0.376132	-0.0931716	5	5	P1P2	0.354625	-0.0588294	3	3	P1P2	0.0353592	0.181611	6	6	P1P2	0.0456746	0.168869	5	5	P1P2	0.00303554	0.162036	5	5	P1P2	0.307278	0.599137	6	6	P1P2	0.552464	0.15953	4	4	P1P2	0.215927	0.603325	3	3
pseudo_15779	pseudo_transcript_0	0.330595	-0.080254	5	5	pseudo_transcript_0	0.0759182	-0.141257	4	4	pseudo_transcript_0	0.0160212	-0.186738	2	2	pseudo_transcript_0	0.0337225	0.169249	3	3	pseudo_transcript_0	0.96203	-0.0217634	6	6	pseudo_transcript_0	0.0205886	0.162017	2	2	pseudo_transcript_0	0.695195	0.215048	4	4	pseudo_transcript_0	0.160299	-0.809008	3	3	pseudo_transcript_0	0.853312	-0.0704365	2	2
RTCA	P1P2	0.210689	-0.051773	4	4	P1P2	0.380333	-0.0490009	4	4	P1P2	0.399551	0.0529502	1	1	P1P2	0.0891998	0.0549662	6	6	P1P2	0.0538789	0.124111	3	3	P1P2	0.102204	0.161913	1	1	P1P2	0.116446	-0.777936	3	3	P1P2	0.98676	-0.000412654	2	2
TMSB15B	ENST00000419165.1	0.238965	-0.0593202	4	4	ENST00000436583.1,ENST00000540220.1,ENST00000569577.1	0.115498	0.0811051	2	2	ENST00000419165.1	0.0304154	-0.112804	2	2	ENST00000419165.1	0.0483379	0.126671	6	6	ENST00000419165.1	0.135398	0.106422	4	4	ENST00000436583.1,ENST00000540220.1,ENST00000569577.1	0.102204	0.16187	1	1	ENST00000436583.1,ENST00000540220.1,ENST00000569577.1	0.176215	0.559772	3	3	ENST00000436583.1,ENST00000540220.1,ENST00000569577.1	0.0148951	1.34006	3	3	ENST00000436583.1,ENST00000540220.1,ENST00000569577.1	0.161683	0.96712	1	1
RNF38	ENST00000350199.4,ENST00000357058.3	0.035195	-0.124404	6	6	ENST00000350199.4,ENST00000357058.3	0.0326769	-0.241151	7	7	ENST00000350199.4,ENST00000357058.3	0.00178272	-0.148464	4	4	ENST00000377885.2	0.0802055	-0.105153	5	5	ENST00000377885.2	0.693918	0.0103079	4	4	ENST00000350199.4,ENST00000357058.3	0.073351	0.161703	5	5	ENST00000350199.4,ENST00000357058.3	0.370421	0.310682	5	5	ENST00000350199.4,ENST00000357058.3	0.413665	-1.35537	7	7	ENST00000377885.2	0.292509	-0.396643	3	3
CCAR1	P1P2	0.693985	-0.0153574	3	3	P1P2	0.355639	-0.119706	2	2	P1P2	0.135595	-0.104857	1	1	P1P2	0.653003	0.0259181	2	2	P1P2	0.454343	0.0950511	4	4	P1P2	0.102204	0.161695	1	1	P1P2	0.300181	0.509044	4	4	P1P2	0.714035	0.157071	3	3	P1P2	0.535334	0.217322	3	3
HBS1L	P1P2	0.0200358	-0.148775	3	3	P1P2	0.148593	-0.0965212	3	3	P1P2	0.236512	-0.0697736	1	1	P1P2	0.0444881	0.184585	2	2	P1P2	0.999631	-0.0155491	4	4	P1P2	0.102204	0.161528	1	1	P1P2	0.330107	-0.497604	7	7	P1P2	0.0379532	-1.52422	6	6	P1P2	0.0999444	-0.861344	5	5
PGA3	P1P2	0.952305	0.0169307	2	2	P1P2	0.420909	-0.0558372	2	2	P1P2	0.252703	-0.0654382	1	1	P1P2	0.630587	0.0215512	4	4	P1P2	0.0619978	0.124112	3	3	P1P2	0.0285404	0.161207	2	2	P1P2	0.106873	1.03491	5	5	P1P2	0.00831918	1.54021	3	3	P1P2	0.0642591	0.961044	2	2
PODXL	P1P2	0.671526	0.0314881	1	1	P1P2	0.23309	-0.105768	1	1						P1P2	0.526873	-0.0763936	4	4	P1P2	0.188136	0.0969565	5	5	P1P2	0.102827	0.161034	1	1	P1P2	0.525598	-0.323484	2	2	P1P2	0.11817	1.6206	1	1
HIST1H3H	ENST00000369163.2	0.515919	-0.056349	5	5	ENST00000369163.2	0.0328048	-0.149285	4	4	ENST00000369163.2	0.0547514	-0.0920153	2	2	ENST00000369163.2	0.464204	0.0814225	4	4	ENST00000369163.2	0.0636941	0.236207	5	5	ENST00000369163.2	0.0153895	0.160993	3	3	ENST00000369163.2	0.133689	0.690425	3	3	ENST00000369163.2	0.0782861	1.14817	4	4	ENST00000369163.2	0.0494095	1.00332	2	2
UBOX5	P1P2	0.0336414	-0.142864	7	7	P1P2	0.717521	-0.0415366	5	5	P1P2	0.156058	-0.055881	4	4	P1P2	0.562472	0.0874513	10	10	P1P2	0.0528214	0.229658	8	8	P1P2	0.052855	0.160977	8	8	P1P2	0.716146	-0.737516	7	7	P1P2	0.127849	1.00975	6	6	P1P2	0.339283	0.584115	5	5
C9orf69	P1P2	0.105539	0.195481	1	1	P1P2	0.765208	-0.0159042	4	4						P1P2	0.772667	-0.014726	2	2	P1P2	0.0347514	0.213859	4	4	P1P2	0.102827	0.160926	1	1	P1P2	0.206539	0.660258	2	2	P1P2	0.916899	0.0784765	1	1	P1P2	0.352941	0.527847	1	1
pseudo_9221	pseudo_transcript_0	0.0331414	-0.193642	5	5	pseudo_transcript_0	0.979492	0.0323102	7	7	pseudo_transcript_0	0.255903	-0.0691344	3	3	pseudo_transcript_0	0.0732893	0.161671	7	7	pseudo_transcript_0	0.161443	0.198185	7	7	pseudo_transcript_0	0.0101198	0.160678	7	7	pseudo_transcript_0	0.0748337	-0.81133	6	6	pseudo_transcript_0	0.070821	1.30669	5	5	pseudo_transcript_0	0.837823	0.0821303	3	3
MAP4K2	P1P2	0.00747381	-0.150217	7	7	P1P2	0.715871	0.0151645	3	3	P1P2	0.728045	-0.00779323	2	2	P1P2	0.0166224	0.134025	7	7	P1P2	0.17165	0.163525	1	1	P1P2	0.102827	0.160607	1	1	P1P2	0.76126	-0.488165	7	7	P1P2	0.281591	0.598769	3	3	P1P2	0.421004	0.338176	3	3
NAA50	P1P2	0.797816	0.0434967	3	3	P1P2	0.168615	-0.0739922	3	3	P1P2	0.0451812	-0.094986	2	2	P1P2	0.65065	0.0346935	1	1	P1P2	0.939945	0.0235302	2	2	P1P2	0.102827	0.160576	1	1	P1P2	0.741343	0.126737	3	3	P1P2	0.213298	0.613774	3	3	P1P2	0.61088	0.228214	2	2
PYROXD2	P1P2	0.590848	-0.0309287	2	2	P1P2	0.888352	0.0115431	5	5	P1P2	0.360167	-0.0432246	1	1	P1P2	0.131933	0.15527	1	1	P1P2	0.187148	0.114485	4	4	P1P2	0.102827	0.160391	1	1	P1P2	0.626622	0.166917	3	3	P1P2	0.691589	-0.375128	4	4	P1P2	0.223841	0.486567	3	3
NICN1	P1P2	0.689656	0.00438412	4	4	P1P2	0.4678	-0.059519	3	3	P1P2	0.378042	0.0483121	2	2	P1P2	0.356691	-0.0611204	4	4	P1P2	0.0148347	0.347476	2	2	P1P2	0.102827	0.160319	1	1	P1P2	0.456117	-0.355159	3	3	P1P2	0.148823	0.849556	2	2	P1P2	0.874302	-0.042571	1	1
CBLN1	P1P2	0.216071	-0.0207879	5	5	P1P2	0.264131	0.0457574	3	3	P1P2	0.448254	-0.0223046	2	2	P1P2	0.0232233	0.120995	4	4	P1P2	0.655972	0.0807621	2	2	P1P2	0.102827	0.160313	1	1	P1P2	0.393134	0.605267	7	7	P1P2	0.683655	0.221297	2	2	P1P2	0.957945	0.0059464	1	1
EHBP1L1	P1P2	0.122881	-0.0894589	3	3	P1P2	0.744098	-0.025829	5	5	P1P2	0.279218	-0.0577399	1	1	P1P2	0.816431	0.0939348	5	5	P1P2	0.426475	0.165701	7	7	P1P2	0.0347833	0.160227	4	4	P1P2	0.875382	-0.0896493	4	4	P1P2	0.55053	-0.407584	5	5	P1P2	0.907576	0.056566	2	2
pseudo_15573	pseudo_transcript_0	0.220084	-0.099464	7	7	pseudo_transcript_0	0.48915	-0.0146614	8	8	pseudo_transcript_0	0.468315	-0.0662895	6	6	pseudo_transcript_0	0.464657	0.0364548	6	6	pseudo_transcript_0	0.326058	0.0673996	9	9	pseudo_transcript_0	0.245269	0.159787	6	6	pseudo_transcript_0	0.199364	-0.42199	7	7	pseudo_transcript_0	0.37518	-0.810508	7	7	pseudo_transcript_0	0.135744	-0.626525	6	6
pseudo_17516	pseudo_transcript_0	0.725711	-0.0418648	5	5	pseudo_transcript_0	0.587165	-0.0481536	4	4	pseudo_transcript_0	0.776586	-0.0212448	3	3	pseudo_transcript_0	0.0209182	0.112511	6	6	pseudo_transcript_0	0.416926	0.0355606	3	3	pseudo_transcript_0	0.0214039	0.159723	2	2	pseudo_transcript_0	0.407141	0.621752	4	4	pseudo_transcript_0	0.889884	-0.161536	3	3	pseudo_transcript_0	0.553885	0.578526	2	2
pseudo_10753	pseudo_transcript_0	0.181618	-0.0394178	9	9	pseudo_transcript_0	0.327458	-0.0693152	6	6	pseudo_transcript_0	0.415682	-0.0504902	6	6	pseudo_transcript_0	0.337683	0.143204	9	9	pseudo_transcript_0	0.0089148	0.239822	8	8	pseudo_transcript_0	0.0659372	0.159674	7	7	pseudo_transcript_0	0.631239	0.397075	8	8	pseudo_transcript_0	0.0235723	1.416	6	6	pseudo_transcript_0	0.239804	1.19513	5	5
pseudo_5223	pseudo_transcript_0	0.264903	-0.0490382	3	3	pseudo_transcript_0	0.232461	-0.0573623	3	3	pseudo_transcript_0	0.281684	-0.048189	2	2	pseudo_transcript_0	0.123218	0.112177	4	4	pseudo_transcript_0	0.646737	0.0861398	5	5	pseudo_transcript_0	0.10314	0.159639	1	1	pseudo_transcript_0	0.819244	0.278018	4	4	pseudo_transcript_0	0.594218	-0.353635	3	3	pseudo_transcript_0	0.689489	0.225905	1	1
FAM46A	P1P2	0.0405279	-0.134823	4	4	P1P2	0.276796	-0.0679494	4	4	P1P2	0.166993	-0.0553913	2	2	P1P2	0.0251186	0.22494	6	6	P1P2	0.0957107	0.145608	7	7	P1P2	0.00668895	0.159595	6	6	P1P2	0.208737	-0.526902	3	3	P1P2	0.584876	0.131577	3	3	P1P2	0.479807	-0.423549	2	2
OR5R1	ENST00000312253.1	0.118562	-0.155811	1	1	ENST00000312253.1	0.285427	-0.0718506	2	2	ENST00000312253.1	0.18505	-0.083057	1	1	ENST00000312253.1	0.132482	0.125531	2	2	ENST00000312253.1	0.0565987	0.192199	2	2	ENST00000312253.1	0.103454	0.159474	1	1	ENST00000312253.1	0.259967	0.567942	2	2
PSMB10	P1P2	0.00868234	-0.164518	6	6	P1P2	0.68698	-0.110975	4	4	P1P2	0.0997114	-0.104369	2	2	P1P2	0.107683	-0.00128063	8	8	P1P2	0.0266244	0.230347	5	5	P1P2	0.0153921	0.159367	5	5	P1P2	0.226487	-0.802631	6	6	P1P2	0.760563	0.177626	3	3	P1P2	0.455447	-0.436435	1	1
pseudo_989	pseudo_transcript_0	0.141503	-0.125616	6	6	pseudo_transcript_0	0.0978844	0.118937	4	4	pseudo_transcript_0	0.35408	-0.028039	3	3	pseudo_transcript_0	0.388334	0.0937677	10	10	pseudo_transcript_0	0.0396295	0.260084	5	5	pseudo_transcript_0	0.00419772	0.15913	5	5	pseudo_transcript_0	0.770827	-0.20548	6	6	pseudo_transcript_0	0.0231615	1.22112	4	4	pseudo_transcript_0	0.121666	0.581618	4	4
BAD	P1P2	0.13147	-0.0847848	3	3	P1P2	0.901694	-0.00693329	4	4	P1P2	0.380825	-0.0293315	2	2	P1P2	0.0599399	0.10536	4	4	P1P2	0.227603	0.0822376	4	4	P1P2	0.103454	0.158908	1	1	P1P2	0.722609	0.114826	4	4	P1P2	0.858056	0.0888286	2	2	P1P2	0.180705	0.884617	1	1
pseudo_9286	pseudo_transcript_0	0.243156	0.128123	4	4	pseudo_transcript_0	0.916338	-0.0103644	5	5	pseudo_transcript_0	0.262216	0.0378877	4	4	pseudo_transcript_0	0.394674	0.0619632	5	5	pseudo_transcript_0	0.0524987	0.0817344	6	6	pseudo_transcript_0	0.00612062	0.158843	4	4	pseudo_transcript_0	0.0909365	1.4513	6	6	pseudo_transcript_0	0.466966	0.328438	5	5	pseudo_transcript_0	0.0970811	1.35539	4	4
pseudo_8189	pseudo_transcript_0	0.0272468	-0.118227	6	6	pseudo_transcript_0	0.563908	-0.0442235	3	3	pseudo_transcript_0	0.444656	-0.0347604	1	1	pseudo_transcript_0	0.0126017	0.143594	6	6	pseudo_transcript_0	0.181605	0.11331	3	3	pseudo_transcript_0	0.103768	0.158765	1	1	pseudo_transcript_0	0.635708	-0.306357	6	6	pseudo_transcript_0	0.202312	0.736198	2	2	pseudo_transcript_0	0.943409	-0.00245163	1	1
PRDM13	P1P2	0.00497251	-0.133025	8	8	P1P2	0.00553317	0.141428	6	6	P1P2	0.627745	-0.0120805	4	4	P1P2	0.00251152	0.172825	10	10	P1P2	0.742899	0.053931	8	8	P1P2	0.224232	0.158305	8	8	P1P2	0.835372	-0.352622	8	8	P1P2	0.457347	0.466549	8	8	P1P2	0.381958	-0.737757	6	6
pseudo_10617	pseudo_transcript_0	0.664678	-0.0312596	2	2	pseudo_transcript_0	0.470007	-0.0713474	4	4	pseudo_transcript_0	0.338666	-0.0484133	1	1	pseudo_transcript_0	0.705996	-0.0295914	4	4	pseudo_transcript_0	0.531642	0.0442358	4	4	pseudo_transcript_0	0.104399	0.158081	1	1	pseudo_transcript_0	0.377793	-0.633694	1	1	pseudo_transcript_0	0.844306	-0.0337135	3	3
pseudo_14672	pseudo_transcript_0	0.627836	-0.0341774	1	1	pseudo_transcript_0	0.808481	0.0150315	2	2						pseudo_transcript_0	0.598804	0.0461989	2	2	pseudo_transcript_0	0.462429	0.0870459	5	5	pseudo_transcript_0	0.104399	0.158081	1	1	pseudo_transcript_0	0.715163	0.306383	4	4	pseudo_transcript_0	0.550861	0.324879	2	2	pseudo_transcript_0	0.427771	0.451646	1	1
pseudo_6338	pseudo_transcript_0	0.886273	-0.00678474	3	3	pseudo_transcript_0	0.774688	0.022105	6	6	pseudo_transcript_0	0.984066	0.00681287	1	1	pseudo_transcript_0	0.191767	0.0719836	5	5	pseudo_transcript_0	0.258603	0.0759651	4	4	pseudo_transcript_0	0.104399	0.158081	1	1	pseudo_transcript_0	0.157015	0.564582	3	3	pseudo_transcript_0	0.492567	0.363622	3	3	pseudo_transcript_0	0.568736	-0.321705	1	1
pseudo_11504	pseudo_transcript_0	0.208636	-0.0521871	3	3	pseudo_transcript_0	0.987298	-0.00186662	4	4	pseudo_transcript_0	0.946442	0.0030304	1	1	pseudo_transcript_0	0.119547	0.0946253	2	2	pseudo_transcript_0	0.807761	-0.0103021	3	3	pseudo_transcript_0	0.105033	0.157858	1	1	pseudo_transcript_0	0.834963	-0.273899	5	5	pseudo_transcript_0	0.885129	0.194022	3	3	pseudo_transcript_0	0.996569	-0.0108417	2	2
pseudo_12106	pseudo_transcript_0	0.56418	0.107245	6	6	pseudo_transcript_0	0.236612	0.0746393	5	5	pseudo_transcript_0	0.74627	0.018901	3	3	pseudo_transcript_0	0.837466	0.0257842	5	5	pseudo_transcript_0	0.647129	0.0387054	3	3	pseudo_transcript_0	0.105033	0.157858	1	1	pseudo_transcript_0	0.328935	0.558503	6	6	pseudo_transcript_0	0.639231	0.433104	3	3	pseudo_transcript_0	0.121289	0.897913	2	2
pseudo_14450	pseudo_transcript_0	0.481636	0.06219	2	2	pseudo_transcript_0	0.10629	0.0826098	3	3	pseudo_transcript_0	0.248692	0.0852942	2	2	pseudo_transcript_0	0.332142	0.0515196	3	3	pseudo_transcript_0	0.656377	-0.0450684	3	3	pseudo_transcript_0	0.105033	0.157858	1	1	pseudo_transcript_0	0.197312	0.574893	3	3	pseudo_transcript_0	0.943408	0.0771517	2	2	pseudo_transcript_0	0.100003	1.48035	1	1
pseudo_4830	pseudo_transcript_0	0.85649	-0.00792872	2	2	pseudo_transcript_0	0.740682	-0.0245832	2	2	pseudo_transcript_0	0.946442	0.0030304	1	1	pseudo_transcript_0	0.813961	0.0196279	2	2	pseudo_transcript_0	0.647946	0.0516047	2	2	pseudo_transcript_0	0.105033	0.157858	1	1	pseudo_transcript_0	0.615779	0.199406	4	4	pseudo_transcript_0	0.533149	0.795034	2	2	pseudo_transcript_0	0.341974	0.675932	2	2
pseudo_5876	pseudo_transcript_0	0.247088	0.140071	5	5	pseudo_transcript_0	0.508534	0.0312671	2	2	pseudo_transcript_0	0.484361	0.0344228	2	2	pseudo_transcript_0	0.317101	0.00717256	6	6	pseudo_transcript_0	0.0417392	0.177937	2	2	pseudo_transcript_0	0.105033	0.157858	1	1	pseudo_transcript_0	0.356525	0.993824	7	7	pseudo_transcript_0	0.990995	0.263142	3	3	pseudo_transcript_0	0.237023	0.584065	3	3
PABPC1L	P1P2	0.134366	-0.0731733	7	7	P1P2	0.911198	-0.0319411	7	7	P1P2	0.233933	-0.0485261	7	7	P1P2	0.0620049	0.0987771	7	7	P1P2	0.0672981	0.226339	7	7	P1P2	0.0162654	0.157598	6	6	P1P2	0.847627	0.0407019	7	7	P1P2	0.00137385	1.52275	8	8	P1P2	0.0362149	0.786279	6	6
HELT	P1P2	0.242014	-0.186669	7	7	P1P2	0.898444	-0.0526491	5	5	P1P2	0.110445	-0.0853023	5	5	P1P2	0.3658	0.00481062	5	5	P1P2	0.0121551	0.193044	5	5	P1P2	0.00509668	0.157483	3	3	P1P2	0.406536	-1.03114	6	6	P1P2	0.0131425	1.51741	5	5	P1P2	0.0673629	0.767231	3	3
pseudo_11889	pseudo_transcript_0	0.0551404	-0.171362	7	7	pseudo_transcript_0	0.67904	-0.176674	7	7	pseudo_transcript_0	0.398059	-0.0724269	5	5	pseudo_transcript_0	0.309536	0.158112	7	7	pseudo_transcript_0	0.503054	0.0515963	7	7	pseudo_transcript_0	0.109036	0.157365	6	6	pseudo_transcript_0	0.187769	-0.537193	7	7	pseudo_transcript_0	0.891358	-0.433512	6	6	pseudo_transcript_0	0.380565	-0.434009	5	5
pseudo_4782	pseudo_transcript_0	0.309239	-0.0277801	8	8	pseudo_transcript_0	0.133419	-0.210242	9	9	pseudo_transcript_0	0.0941442	-0.0779569	7	7	pseudo_transcript_0	0.144735	0.0605942	9	9	pseudo_transcript_0	0.125774	0.101793	5	5	pseudo_transcript_0	0.0357681	0.157319	5	5	pseudo_transcript_0	0.391469	0.780137	7	7	pseudo_transcript_0	0.407568	0.501222	5	5	pseudo_transcript_0	0.335183	0.659869	5	5
KLK8	P1P2	0.878114	-0.0107695	3	3	P1P2	0.562624	-0.0505213	3	3	P1P2	0.240853	-0.0687545	1	1	P1P2	0.685158	0.029077	5	5	P1P2	0.0388845	0.211365	4	4	P1P2	0.0329062	0.157238	2	2	P1P2	0.962008	0.740662	5	5	P1P2	0.846935	0.134855	1	1	P1P2	0.352941	0.526204	1	1
SLC11A2	P2	0.087558	0.104136	6	6	P2	0.28302	-0.0640994	3	3	P2	0.31977	-0.0511658	1	1	P1	0.0029547	0.296966	3	3	P1	0.0084988	0.233608	6	6	P1	0.105351	0.15722	1	1	P1	0.00030475	2.59023	5	5	P1	0.00500628	2.04368	3	3	P1	0.0150035	2.19017	2	2
pseudo_17479	pseudo_transcript_0	0.515681	0.0485359	1	1	pseudo_transcript_0	0.0530282	-0.0970833	3	3	pseudo_transcript_0	0.446823	-0.0347299	1	1	pseudo_transcript_0	0.121335	0.109186	5	5	pseudo_transcript_0	0.0362211	0.151839	5	5	pseudo_transcript_0	0.0220033	0.156977	2	2	pseudo_transcript_0	0.815618	-0.537217	2	2	pseudo_transcript_0	0.229658	0.694205	2	2	pseudo_transcript_0	0.151597	1.02507	1	1
EIF3F	P1P2	0.0478057	-0.218361	6	6	P1P2	0.787552	-0.0477332	7	7	P1P2	0.133237	-0.159384	6	6	P1P2	0.0137689	0.195092	5	5	P1P2	0.0246477	0.167804	7	7	P1P2	0.00472506	0.156853	5	5	P1P2	0.893349	0.855247	6	6	P1P2	0.121052	1.57164	8	8	P1P2	0.230947	1.35002	6	6
IMMP1L	P1P2	0.725653	0.0456417	9	9	P1P2	0.898618	0.00317167	2	2	P1P2	0.726118	0.0372356	2	2	P1P2	0.0442185	0.194281	2	2	P1P2	0.0667123	0.167987	6	6	P1P2	0.105351	0.156703	1	1	P1P2	0.726187	0.129064	3	3	P1P2	0.337089	0.784938	1	1
pseudo_1878	pseudo_transcript_0	0.115968	-0.0928434	4	4	pseudo_transcript_0	0.67005	0.0200754	5	5	pseudo_transcript_0	0.425532	-0.019188	3	3	pseudo_transcript_0	0.13681	0.242768	6	6	pseudo_transcript_0	0.352663	0.0591701	8	8	pseudo_transcript_0	0.0360017	0.156465	5	5	pseudo_transcript_0	0.353919	0.580108	4	4	pseudo_transcript_0	0.0986806	1.07478	4	4	pseudo_transcript_0	0.144772	1.08701	1	1
pseudo_869	pseudo_transcript_1	0.128209	-0.133266	4	4	pseudo_transcript_1	0.23309	-0.105768	1	1	pseudo_transcript_0	0.0881426	0.0774431	2	2	pseudo_transcript_1	0.306049	0.0825615	4	4	pseudo_transcript_0	0.258221	-0.127235	1	1	pseudo_transcript_1	0.0276411	0.156461	2	2	pseudo_transcript_1	0.588963	-0.407156	2	2	pseudo_transcript_0	0.854438	0.0930444	2	2	pseudo_transcript_1	0.24849	0.710254	1	1
NIPAL3	P1P2	0.366706	0.049761	5	5	P1P2	0.232461	-0.084091	3	3	P1P2	0.0601376	-0.0877716	2	2	P1P2	0.61031	-0.0377996	3	3	P1P2	0.0190367	0.225258	6	6	P1P2	0.105351	0.156331	1	1	P1P2	0.783415	-0.352251	3	3	P1P2	0.996322	-0.00919739	2	2	P1P2	0.538633	-0.339992	2	2
ANAPC11	P1P2	0.811619	0.0919183	5	5	P1P2	0.596269	-0.0499463	4	4	P1P2	0.673796	-0.0113643	3	3	P1P2	0.52796	0.0481214	5	5	P1P2	0.060355	0.199767	6	6	P1P2	0.0406342	0.15627	4	4	P1P2	0.200546	1.0276	4	4	P1P2	0.300534	0.474571	6	6	P1P2	0.328183	0.454962	3	3
PSMA3	P1P2	0.194273	0.117481	1	1	P1P2	0.802468	-0.0166835	2	2	P1P2	0.686907	0.0286685	1	1	P1P2	0.387514	-0.0486855	3	3	P1P2	0.0575394	0.178728	2	2	P1P2	0.105351	0.156263	1	1	P1P2	0.809422	-0.168496	1	1	P1P2	0.153621	1.30797	1	1
ZNF423	ENST00000262383.2	0.301905	-0.0865999	6	6	ENST00000561648.1	0.511316	0.0360179	5	5	ENST00000561648.1	0.542202	0.0298892	2	2	ENST00000561648.1	0.199844	0.187049	5	5	ENST00000561648.1	0.164863	0.169112	6	6	ENST00000561648.1	0.0104209	0.156214	3	3	ENST00000262383.2	0.200552	-0.957022	7	7	ENST00000561648.1	0.393858	0.362746	5	5	ENST00000561648.1	0.553885	0.282904	2	2
pseudo_16849	pseudo_transcript_0	0.284579	0.0854792	1	1	pseudo_transcript_0	0.577375	-0.0574467	4	4						pseudo_transcript_0	0.483392	0.0727069	2	2	pseudo_transcript_0	0.412373	0.0583484	5	5	pseudo_transcript_0	0.10567	0.156025	1	1	pseudo_transcript_0	0.276454	0.455745	4	4	pseudo_transcript_0	0.984929	-0.200341	4	4	pseudo_transcript_0	0.704078	-0.25144	2	2
pseudo_17700	pseudo_transcript_0	0.88193	0.00767854	6	6	pseudo_transcript_0	0.190793	-0.102393	4	4	pseudo_transcript_0	0.975377	0.0073763	1	1	pseudo_transcript_0	0.698895	-0.0448881	8	8	pseudo_transcript_0	0.242938	0.122378	1	1	pseudo_transcript_0	0.10567	0.156025	1	1	pseudo_transcript_0	0.223692	0.0531127	6	6	pseudo_transcript_0	0.943408	0.0268392	2	2	pseudo_transcript_0	0.607864	-0.282257	1	1
pseudo_5481	pseudo_transcript_0	0.721711	0.0236626	5	5	pseudo_transcript_0	0.24452	-0.0716313	2	2	pseudo_transcript_0	0.331385	-0.0296929	2	2	pseudo_transcript_0	0.869749	-0.00219267	3	3	pseudo_transcript_0	0.0430184	0.149667	3	3	pseudo_transcript_0	0.10631	0.155873	1	1	pseudo_transcript_0	0.829406	0.438365	5	5	pseudo_transcript_0	0.484537	0.32351	3	3	pseudo_transcript_0	0.396953	0.466376	2	2
pseudo_13205	pseudo_transcript_0	0.060897	0.138255	5	5	pseudo_transcript_0	0.25741	-0.086995	3	3	pseudo_transcript_0	0.680241	-0.0135108	1	1	pseudo_transcript_0	0.150339	0.0936499	7	7	pseudo_transcript_0	0.00589568	0.218084	5	5	pseudo_transcript_0	0.00290127	0.155596	4	4	pseudo_transcript_0	0.123225	1.46534	6	6	pseudo_transcript_0	0.139863	0.818143	3	3	pseudo_transcript_0	0.114553	0.816126	2	2
HOMER2	P1P2	0.271549	-0.0752812	4	4	P1P2	0.289611	-0.0590625	3	3	P1P2	0.217543	-0.0448073	2	2	P1P2	0.0425434	0.16415	4	4	P1P2	0.0102393	0.164931	5	5	P1P2	0.00317883	0.155554	4	4	P1P2	0.103244	0.666628	5	5	P1P2	0.260707	0.664346	2	2	P1P2	0.173769	0.568967	2	2
pseudo_6222	pseudo_transcript_0	0.833415	0.00100533	5	5	pseudo_transcript_0	0.628846	-0.0342302	6	6	pseudo_transcript_0	0.947247	-0.0198302	4	4	pseudo_transcript_0	0.0820511	0.226706	8	8	pseudo_transcript_0	0.742627	0.0818508	7	7	pseudo_transcript_0	0.0706434	0.155511	6	6	pseudo_transcript_0	0.785369	0.399381	4	4	pseudo_transcript_0	0.534784	-0.184199	7	7	pseudo_transcript_0	0.45484	-0.297592	3	3
pseudo_936	pseudo_transcript_0	0.520874	-0.0526933	4	4	pseudo_transcript_0	0.785665	-0.0770014	5	5	pseudo_transcript_0	0.0807522	-0.155782	2	2	pseudo_transcript_0	0.293734	0.00815658	8	8	pseudo_transcript_0	0.00190802	0.214909	5	5	pseudo_transcript_0	0.00454779	0.155404	4	4	pseudo_transcript_0	0.279541	-0.703776	4	4	pseudo_transcript_0	0.055813	1.23589	4	4	pseudo_transcript_0	0.880374	0.099339	2	2
C11orf57	P1P2	0.170058	-0.110124	4	4	P1P2	0.972198	-0.0786361	5	5	P1P2	0.0690939	-0.059516	3	3	P1P2	0.000451769	0.224096	7	7	P1P2	0.402762	0.0571191	5	5	P1P2	0.00882345	0.155285	5	5	P1P2	0.133344	1.20339	4	4	P1P2	0.984929	-0.0271334	4	4	P1P2	0.610091	0.208137	3	3
pseudo_14841	pseudo_transcript_0	0.821381	-0.0151768	4	4	pseudo_transcript_0	0.40956	-0.0459454	5	5	pseudo_transcript_0	0.815367	0.00200967	3	3	pseudo_transcript_0	0.472352	0.0595648	7	7	pseudo_transcript_0	0.13648	0.209626	6	6	pseudo_transcript_0	0.0883837	0.155225	5	5	pseudo_transcript_0	0.200122	-1.13324	5	5	pseudo_transcript_0	0.51346	0.755949	5	5	pseudo_transcript_0	0.987869	0.0561952	3	3
PAPPA	P1P2	0.116112	-0.0854383	2	2	P1P2	0.198495	-0.1177	1	1						P1P2	0.167103	0.0872606	3	3	P1P2	0.796184	-0.0167106	3	3	P1P2	0.106632	0.155174	1	1	P1P2	0.35874	-0.459017	3	3	P1P2	0.639551	-0.406422	2	2	P1P2	0.742486	-0.162052	1	1
pseudo_12907	pseudo_transcript_0	0.241994	-0.0503907	3	3	pseudo_transcript_0	0.105605	-0.109386	3	3						pseudo_transcript_0	0.641471	0.000699617	6	6	pseudo_transcript_0	0.0280735	0.194579	3	3	pseudo_transcript_0	0.0226172	0.155153	2	2	pseudo_transcript_0	0.394857	0.554065	4	4	pseudo_transcript_0	0.182976	1.17364	1	1
RIOK3	P1P2	0.658425	0.0190048	4	4	P1P2	0.152319	-0.106891	5	5	P1P2	0.562798	-0.0294557	2	2	P1P2	0.384376	0.0267829	6	6	P1P2	0.00738929	0.245242	7	7	P1P2	0.0215242	0.155039	5	5	P1P2	0.223567	0.634731	5	5	P1P2	0.182681	1.46081	5	5	P1P2	0.157694	0.652347	3	3
pseudo_10357	pseudo_transcript_0	0.0430064	-0.223126	5	5	pseudo_transcript_0	0.636683	0.0303795	2	2	pseudo_transcript_0	0.0604883	-0.114654	2	2	pseudo_transcript_0	0.0313254	0.240817	5	5	pseudo_transcript_0	0.8641	-0.00845823	6	6	pseudo_transcript_0	0.0401767	0.154984	5	5	pseudo_transcript_0	0.819244	-0.121828	4	4	pseudo_transcript_0	0.888695	0.244464	3	3	pseudo_transcript_0	0.598876	0.328811	2	2
pseudo_1264	pseudo_transcript_0	0.908313	-0.0248209	5	5	pseudo_transcript_0	0.937426	-0.00196616	4	4	pseudo_transcript_0	0.650589	-0.0101424	2	2	pseudo_transcript_0	0.931399	-0.014757	4	4	pseudo_transcript_0	0.0913658	0.109786	3	3	pseudo_transcript_0	0.1076	0.154791	1	1	pseudo_transcript_0	0.302743	-0.352035	4	4	pseudo_transcript_0	0.124117	1.54973	1	1	pseudo_transcript_0	0.133922	1.17714	1	1
RAD9A	P1P2	0.0761744	-0.083596	4	4	P1P2	0.572154	0.0521853	6	6	P1P2	0.259375	-0.0402832	2	2	P1P2	0.41375	0.0638653	1	1	P1P2	0.913296	0.0902013	5	5	P1P2	0.107924	0.154737	1	1	P1P2	0.764631	-0.156219	2	2	P1P2	0.607287	0.482868	4	4	P1P2	0.208587	0.798909	1	1
VEZF1	P1P2	0.781033	0.0857737	6	6	P1P2	0.231404	-0.0931716	5	5	P1P2	0.876831	0.0386007	4	4	P1P2	0.533968	0.0879876	6	6	P1P2	0.005746	0.206678	6	6	P1P2	0.0134013	0.154389	6	6	P1P2	0.308435	1.15842	6	6	P1P2	0.0889824	0.934706	4	4	P1P2	0.115924	0.997897	4	4
PUM2	P1P2	0.96028	-0.00131562	5	5	P1P2	0.607739	0.00584308	4	4	P1P2	0.840346	0.0148299	2	2	P1P2	0.745309	-0.00362167	3	3	P1P2	0.789177	-0.00442406	3	3	P1P2	0.107924	0.154059	1	1	P1P2	0.887506	0.0513764	3	3	P1P2	0.920284	0.0270963	3	3	P1P2	0.116462	1.29363	1	1
PAGR1	P1P2	0.892444	-0.0870084	7	7	P1P2	0.870893	-0.031728	7	7	P1P2	0.800971	-0.069414	6	6	P1P2	0.503308	0.0776526	7	7	P1P2	0.119001	0.218386	8	8	P1P2	0.158416	0.154034	7	7	P1P2	0.712779	0.422177	7	7	P1P2	0.0856985	1.23871	7	7	P1P2	0.0910336	0.701099	6	6
GANC	P1P2	0.384682	-0.0285392	8	8	P1P2	0.566746	-0.0606892	5	5	P1P2	0.0644587	-0.0735609	5	5	P1P2	0.00944187	0.160431	8	8	P1P2	0.514753	0.106007	8	8	P1P2	0.0218493	0.153936	7	7	P1P2	0.406818	1.1737	7	7	P1P2	0.882397	-0.0956549	5	5	P1P2	0.916957	0.0916193	4	4
pseudo_304	pseudo_transcript_0	0.117352	-0.0762941	6	6	pseudo_transcript_0	0.665862	-0.0228952	3	3	pseudo_transcript_0	0.786591	0.0197389	2	2	pseudo_transcript_0	0.692554	-0.0741654	6	6	pseudo_transcript_0	0.0625776	0.123522	5	5	pseudo_transcript_0	0.0236306	0.153652	2	2	pseudo_transcript_0	0.892321	-1.17854	7	7	pseudo_transcript_0	0.894285	-0.485706	4	4	pseudo_transcript_0	0.878113	-0.131539	2	2
SELP	P1P2	0.818013	0.0211589	2	2	P1P2	0.266596	-0.0721661	2	2	P1P2	0.148404	-0.098548	1	1	P1P2	0.394441	0.067383	1	1	P1P2	0.53575	0.035918	3	3	P1P2	0.107924	0.153546	1	1	P1P2	0.847488	0.287371	2	2	P1P2	0.653674	-0.373894	1	1
pseudo_8952	pseudo_transcript_0	0.660749	-0.0671635	5	5	pseudo_transcript_1	0.190521	-0.0789338	2	2	pseudo_transcript_1	0.20571	-0.0750024	1	1	pseudo_transcript_1	0.207772	0.0758365	4	4	pseudo_transcript_0	0.30108	0.0842917	6	6	pseudo_transcript_1	0.022867	0.153513	2	2	pseudo_transcript_0	0.155977	1.15107	7	7	pseudo_transcript_0	0.274532	-0.615295	6	6	pseudo_transcript_0	0.79928	0.265354	5	5
SEC63	P1P2	0.345625	-0.0506188	7	7	P1P2	0.399373	-0.0442874	3	3	P1P2	0.563703	-0.0226033	1	1	P1P2	0.116376	0.153882	6	6	P1P2	0.828097	0.0675875	4	4	P1P2	0.107924	0.153443	1	1	P1P2	0.0463765	0.917808	3	3	P1P2	0.0822484	1.27475	2	2
UTP6	P1P2	0.0462057	-0.125804	2	2	P1P2	0.192051	0.100433	1	1	P1P2	0.62399	-0.0187774	1	1	P1P2	0.1285	0.0962325	3	3	P1P2	0.767643	0.149777	2	2	P1P2	0.175711	0.153416	2	2	P1P2	0.974978	-0.0378407	4	4	P1P2	0.26149	-0.734843	2	2	P1P2	0.378061	-0.361065	2	2
ARL16	P1P2	0.589016	-0.00214025	5	5	P1P2	0.49318	0.00708959	5	5	P1P2	0.764964	-0.0364687	2	2	P1P2	0.445439	-0.0180778	4	4	P1P2	0.886971	0.0697477	4	4	P1P2	0.565336	0.153159	2	2	P1P2	0.329995	0.424891	3	3	P1P2	0.405137	0.666568	4	4	P1P2	0.144146	1.0348	2	2
PTPN1	P1P2	0.442138	0.0155588	6	6	P1P2	0.483808	0.0507165	8	8	P1P2	0.672331	0.0484268	5	5	P1P2	0.173179	-0.0549035	9	9	P1P2	0.507748	0.0979712	7	7	P1P2	0.0301964	0.152817	6	6	P1P2	0.0923601	0.266745	7	7	P1P2	0.138614	0.668281	7	7	P1P2	0.062414	1.24978	6	6
METRNL	P1P2	0.537697	-0.00952106	5	5	P1P2	0.745353	-0.0296405	6	6	P1P2	0.554804	0.025934	3	3	P1P2	0.123613	0.157539	7	7	P1P2	0.630811	0.0894051	4	4	P1P2	0.0670079	0.152699	2	2	P1P2	0.0599695	1.33823	6	6	P1P2	0.915584	-0.207956	5	5	P1P2	0.137529	0.971471	4	4
pseudo_7620	pseudo_transcript_1	0.273364	-0.0473757	3	3	pseudo_transcript_1	0.0152028	-0.133543	6	6	pseudo_transcript_1	0.0920232	-0.0548823	3	3	pseudo_transcript_1	0.109336	0.171263	5	5	pseudo_transcript_1	0.0996637	0.169518	5	5	pseudo_transcript_1	0.0102933	0.15261	3	3	pseudo_transcript_0	0.109522	0.767147	3	3	pseudo_transcript_0	0.00981937	1.67677	4	4	pseudo_transcript_1	0.115876	0.763176	2	2
ZNF613	P1P2	0.459352	0.0358419	7	7	P1P2	0.0982427	-0.143067	7	7	P1P2	0.598125	-0.00747501	6	6	P1P2	0.107127	0.11851	8	8	P1P2	0.284371	0.147719	9	9	P1P2	0.0248835	0.152551	8	8	P1P2	0.136348	1.31919	8	8	P1P2	0.573652	0.602392	7	7	P1P2	0.407636	0.509942	6	6
pseudo_13093	pseudo_transcript_0	0.297487	-0.0211262	5	5	pseudo_transcript_1	0.329015	-0.0601962	4	4	pseudo_transcript_0	0.115044	-0.0684853	3	3	pseudo_transcript_1	0.335847	0.0949737	5	5	pseudo_transcript_1	0.100972	0.185101	6	6	pseudo_transcript_0	0.10825	0.152499	1	1	pseudo_transcript_1	0.609489	-0.238268	4	4	pseudo_transcript_0	0.0989662	1.8742	1	1	pseudo_transcript_0	0.119803	1.27753	1	1
pseudo_1947	pseudo_transcript_0	0.125242	-0.110897	4	4	pseudo_transcript_0	0.613034	0.0335717	2	2	pseudo_transcript_0	0.715164	-0.0111998	1	1	pseudo_transcript_0	0.541735	0.0632315	6	6	pseudo_transcript_0	0.0334602	0.209429	2	2	pseudo_transcript_0	0.10825	0.152499	1	1	pseudo_transcript_0	0.806473	-0.0625626	6	6	pseudo_transcript_0	0.0989662	1.8742	1	1	pseudo_transcript_0	0.119803	1.27753	1	1
pseudo_4961	pseudo_transcript_0	0.968925	-0.00634185	6	6	pseudo_transcript_0	0.867887	-0.0235884	4	4	pseudo_transcript_0	0.678722	-0.00515203	4	4	pseudo_transcript_0	0.194124	0.063819	4	4	pseudo_transcript_0	0.096775	0.259158	1	1	pseudo_transcript_0	0.10825	0.152499	1	1	pseudo_transcript_0	0.710708	0.19354	4	4	pseudo_transcript_0	0.0989662	1.8742	1	1	pseudo_transcript_0	0.119803	1.27753	1	1
pseudo_18535	pseudo_transcript_0	0.375506	0.0507605	5	5	pseudo_transcript_0	0.53916	-0.0984747	5	5	pseudo_transcript_0	0.547895	0.037605	4	4	pseudo_transcript_0	0.955709	0.0251649	6	6	pseudo_transcript_0	0.157704	0.164897	3	3	pseudo_transcript_0	0.023246	0.15244	2	2	pseudo_transcript_0	0.306096	0.900786	5	5	pseudo_transcript_0	0.0269912	1.65037	2	2	pseudo_transcript_0	0.0286234	1.25572	2	2
pseudo_10374	pseudo_transcript_0	0.185137	0.088937	3	3	pseudo_transcript_0	0.344757	0.0247388	4	4	pseudo_transcript_0	0.798458	0.0175618	2	2	pseudo_transcript_0	0.459093	-0.00791757	5	5	pseudo_transcript_0	0.667848	0.10532	2	2	pseudo_transcript_0	0.108902	0.152381	1	1	pseudo_transcript_0	0.0725375	1.04638	2	2	pseudo_transcript_0	0.832546	-0.111838	3	3	pseudo_transcript_0	0.123712	1.23392	1	1
pseudo_14441	pseudo_transcript_0	0.667853	0.0668559	5	5	pseudo_transcript_0	0.170831	-0.109127	5	5	pseudo_transcript_0	0.697403	8.11178e-05	4	4	pseudo_transcript_0	0.714664	0.0410114	6	6	pseudo_transcript_0	0.0635082	0.178164	3	3	pseudo_transcript_0	0.108902	0.152381	1	1	pseudo_transcript_0	0.204426	0.930538	4	4	pseudo_transcript_0	0.295395	0.713772	2	2	pseudo_transcript_0	0.123712	1.23392	1	1
pseudo_2737	pseudo_transcript_0	0.738425	0.032611	5	5	pseudo_transcript_0	0.925207	0.00837808	4	4	pseudo_transcript_0	0.67479	0.0246395	2	2	pseudo_transcript_0	0.334793	0.0632691	4	4	pseudo_transcript_0	0.0264156	0.189381	4	4	pseudo_transcript_0	0.108902	0.152381	1	1	pseudo_transcript_0	0.19329	0.658531	4	4	pseudo_transcript_0	0.383161	0.305318	3	3	pseudo_transcript_0	0.939447	0.0819869	2	2
pseudo_445	pseudo_transcript_0	0.260984	-0.0985585	6	6	pseudo_transcript_1	0.307459	0.0450085	4	4	pseudo_transcript_0	0.303329	-0.0275808	3	3	pseudo_transcript_0	0.0593859	-0.112802	7	7	pseudo_transcript_1	0.508636	0.0384462	3	3	pseudo_transcript_1	0.0344832	0.152152	2	2	pseudo_transcript_0	0.00669797	-1.94408	7	7	pseudo_transcript_1	0.111566	-2.11216	1	1	pseudo_transcript_0	0.0410247	-0.808881	3	3
TP53RK	P1P2	0.0162363	-0.180776	6	6	P1P2	0.323979	-0.0826522	8	8	P1P2	0.00280619	-0.155822	5	5	P1P2	0.0347402	0.239332	7	7	P1P2	0.722624	-0.0107297	7	7	P1P2	0.0915949	0.152005	6	6	P1P2	0.552938	0.506177	7	7	P1P2	0.311627	-1.77729	8	8	P1P2	0.481294	-0.504104	6	6
pseudo_15742	pseudo_transcript_0	0.123063	0.138525	6	6	pseudo_transcript_0	0.478247	-0.0467181	6	6	pseudo_transcript_0	0.815367	0.012771	3	3	pseudo_transcript_0	0.0596276	0.0579616	6	6	pseudo_transcript_0	0.130972	0.177216	5	5	pseudo_transcript_0	0.0909091	0.151989	4	4	pseudo_transcript_0	0.491025	0.836853	5	5	pseudo_transcript_0	0.243859	0.857185	5	5	pseudo_transcript_0	0.84331	-0.026986	3	3
SREBF2	P1P2	0.499115	-0.0259221	5	5	P1P2	0.58041	-0.0872813	6	6	P1P2	0.627745	-0.0258783	4	4	P1P2	0.000333432	0.209934	7	7	P1P2	0.0158628	0.279059	9	9	P1P2	0.00060055	0.151808	7	7	P1P2	0.00043102	1.97273	7	7	P1P2	0.108079	0.198146	7	7	P1P2	0.0404903	1.40325	5	5
GRIA4	P1P2	0.36299	-0.0502658	7	7	P1P2	0.485325	0.061238	4	4	P1P2	0.649504	-0.0141967	3	3	P1P2	0.0739922	0.141999	8	8	P1P2	0.242513	0.178629	7	7	P1P2	0.0852789	0.151795	6	6	P1P2	0.452024	0.781667	7	7	P1P2	0.11449	0.887503	4	4	P1P2	0.180891	0.560724	3	3
MLLT11	P1P2	0.833068	0.0158065	5	5	P1P2	0.958488	-0.0041958	2	2	P1P2	0.255728	-0.0638102	1	1	P1P2	0.509681	0.0349472	5	5	P1P2	0.329626	-0.136863	3	3	P1P2	0.109229	0.151673	1	1	P1P2	0.304381	0.541038	4	4	P1P2	0.123586	0.697339	4	4	P1P2	0.019205	0.937426	3	3
CCR10	P1P2	0.0103915	-0.138407	4	4	P1P2	0.842964	-0.0179869	2	2	P1P2	0.122063	-0.0841614	2	2	P1P2	0.319077	0.0699313	3	3	P1P2	0.109361	0.099523	3	3	P1P2	0.109229	0.151517	1	1	P1P2	0.435426	-0.222809	5	5	P1P2	0.279557	0.558731	4	4	P1P2	0.625017	-0.168508	2	2
KIAA1377	P1P2	0.0370704	0.168587	2	2	P1P2	0.305489	-0.0573935	3	3	P1P2	0.528684	0.0307251	2	2	P1P2	0.51415	-0.0589021	2	2	P1P2	0.846181	0.0430508	4	4	P1P2	0.109229	0.151462	1	1	P1P2	0.448307	0.00315763	4	4	P1P2	0.202312	0.749641	2	2	P1P2	0.651639	0.55254	2	2
pseudo_13236	pseudo_transcript_0	0.292939	-0.0731299	3	3	pseudo_transcript_0	0.137978	-0.0778418	4	4	pseudo_transcript_0	0.0948876	-0.0754859	3	3	pseudo_transcript_0	0.0235147	0.151716	3	3	pseudo_transcript_0	0.0170784	0.201954	7	7	pseudo_transcript_0	0.00588987	0.151442	3	3	pseudo_transcript_1	0.270781	0.524912	4	4	pseudo_transcript_0	0.564615	0.554106	5	5	pseudo_transcript_1	0.4197	0.434768	2	2
pseudo_6292	pseudo_transcript_0	0.722915	-0.0443096	4	4	pseudo_transcript_0	0.748186	-0.14463	5	5	pseudo_transcript_0	0.0811989	-0.123743	2	2	pseudo_transcript_0	0.424234	0.0468467	4	4	pseudo_transcript_0	0.0877314	0.106417	3	3	pseudo_transcript_0	0.109558	0.151127	1	1	pseudo_transcript_0	0.420797	0.276616	4	4	pseudo_transcript_0	0.414388	0.427609	4	4	pseudo_transcript_0	0.486964	0.389391	2	2
pseudo_656	pseudo_transcript_0	0.569171	-0.0287866	2	2	pseudo_transcript_0	0.698266	-0.0194123	2	2	pseudo_transcript_0	0.457744	-0.0328179	1	1	pseudo_transcript_0	0.358576	0.0561636	4	4	pseudo_transcript_0	0.253235	0.0835916	2	2	pseudo_transcript_0	0.109558	0.151127	1	1	pseudo_transcript_0	0.915283	0.0695456	2	2	pseudo_transcript_0	0.168824	1.2445	1	1	pseudo_transcript_0	0.153926	1.01968	1	1
pseudo_16131	pseudo_transcript_1	0.245372	0.069003	4	4	pseudo_transcript_1	0.191242	0.0540392	3	3	pseudo_transcript_1	0.106519	0.124895	1	1	pseudo_transcript_0	0.346063	0.0983786	5	5	pseudo_transcript_0	0.281434	0.00931837	7	7	pseudo_transcript_1	0.110216	0.15099	1	1	pseudo_transcript_0	0.746548	0.456479	5	5	pseudo_transcript_1	0.835482	-0.131709	3	3	pseudo_transcript_1	0.24849	-0.771585	1	1
pseudo_2551	pseudo_transcript_0	0.355691	0.0470276	3	3	pseudo_transcript_1	0.104778	0.0995842	2	2	pseudo_transcript_1	0.22313	0.0773236	1	1	pseudo_transcript_0	0.175333	0.0758954	4	4	pseudo_transcript_0	0.570819	-0.0643821	3	3	pseudo_transcript_0	0.110216	0.15099	1	1	pseudo_transcript_0	0.0693246	1.56287	5	5	pseudo_transcript_1	0.291161	-0.785751	2	2
pseudo_11605	pseudo_transcript_0	0.18148	-0.210614	4	4	pseudo_transcript_0	0.513528	-0.0331158	2	2	pseudo_transcript_0	0.228258	-0.0936916	2	2	pseudo_transcript_0	0.0852081	0.201147	4	4	pseudo_transcript_0	0.519446	0.0912923	6	6	pseudo_transcript_0	0.0124176	0.150775	4	4	pseudo_transcript_0	0.0426308	-0.997759	5	5	pseudo_transcript_0	0.748557	-0.446393	3	3	pseudo_transcript_0	0.946291	0.0361926	2	2
pseudo_14652	pseudo_transcript_0	0.844291	0.0168105	6	6	pseudo_transcript_0	0.053775	-0.108355	5	5	pseudo_transcript_0	0.133478	-0.0569354	3	3	pseudo_transcript_0	0.357397	0.0918498	4	4	pseudo_transcript_0	0.822455	0.0456297	5	5	pseudo_transcript_0	0.024683	0.150724	2	2	pseudo_transcript_0	0.140972	0.467276	5	5	pseudo_transcript_0	0.980485	0.600488	5	5	pseudo_transcript_0	0.283705	0.501965	4	4
pseudo_14424	pseudo_transcript_0	0.0912302	0.0994446	6	6	pseudo_transcript_0	0.318538	0.0378663	3	3	pseudo_transcript_0	0.13044	0.104817	1	1	pseudo_transcript_0	0.261474	-0.062648	6	6	pseudo_transcript_1	0.700567	0.104227	2	2	pseudo_transcript_1	0.110878	0.150666	1	1	pseudo_transcript_0	0.165916	0.657123	8	8	pseudo_transcript_0	0.320142	0.000438562	5	5	pseudo_transcript_0	0.0281138	0.895028	4	4
pseudo_18575	pseudo_transcript_0	0.135214	0.0807214	4	4	pseudo_transcript_0	0.0849386	-0.158993	4	4	pseudo_transcript_0	0.814354	0.0161741	2	2	pseudo_transcript_0	0.213662	-0.0703373	2	2	pseudo_transcript_0	0.0359903	0.240169	2	2	pseudo_transcript_0	0.110878	0.150666	1	1	pseudo_transcript_0	0.107371	-0.692294	3	3	pseudo_transcript_0	0.147788	0.868935	2	2
pseudo_2319	pseudo_transcript_0	0.369313	0.0558429	3	3	pseudo_transcript_1	0.10106	-0.201303	1	1	pseudo_transcript_0	0.726035	0.026217	1	1	pseudo_transcript_1	0.549774	-0.0422737	1	1	pseudo_transcript_1	0.0850953	0.343606	1	1	pseudo_transcript_1	0.110878	0.150666	1	1	pseudo_transcript_0	0.790555	0.566997	2	2	pseudo_transcript_1	0.182976	1.17364	1	1	pseudo_transcript_0	0.301915	-0.646581	1	1
PDLIM7	P1	0.162449	-0.0994348	4	4	P1	0.0946166	-0.0979755	3	3	P1	0.106126	-0.133677	1	1	P1	0.229287	0.0821689	5	5	P1	0.726138	0.0182696	3	3	P1	0.11121	0.15038	1	1	P1	0.423981	-0.255703	6	6	P1	0.239088	0.682172	2	2	P1	0.177425	0.554745	2	2
GADD45GIP1	P1P2	0.104685	-0.180242	1	1	P1P2	0.456986	0.0281699	3	3	P1P2	0.157799	-0.0933947	1	1	P1P2	0.0958539	0.215649	1	1	P1P2	0.952462	0.000981276	2	2	P1P2	0.111877	0.150229	1	1	P1P2	0.390978	-0.673912	5	5	P1P2	0.782818	0.152268	2	2	P1P2	0.941728	-0.0466056	2	2
ZFAND3	P1P2	0.80606	-0.00343983	8	8	P1P2	0.237712	-0.0586787	3	3	P1P2	0.9716	0.0093304	3	3	P1P2	0.100894	0.131255	8	8	P1P2	0.217065	0.112063	6	6	P1P2	0.0444048	0.150172	4	4	P1P2	0.239537	0.662443	6	6	P1P2	0.951694	-0.193037	4	4	P1P2	0.283031	0.450977	2	2
MAGEA8	P1P2	0.00404419	-0.146068	6	6	P1P2	0.204292	-0.0719104	2	2	P1P2	0.0320242	-0.110297	2	2	P1P2	0.0161279	0.204614	5	5	P1P2	0.542484	-0.0846182	6	6	P1P2	0.0634031	0.150048	4	4	P1P2	0.669809	0.806307	7	7	P1P2	0.545333	-1.06579	2	2	P1P2	0.146456	1.08392	1	1
CCSER2	P1P2	0.80492	-0.0117458	3	3	P1P2	0.137182	0.0582393	5	5	P1P2	0.391474	-0.0391739	1	1	P1P2	0.770589	-0.019562	4	4	P1P2	0.104314	0.242352	6	6	P1P2	0.0330783	0.150018	2	2	P1P2	0.540376	-0.117455	6	6	P1P2	0.146695	0.922976	4	4	P1P2	0.408955	0.272567	3	3
SPTAN1	P1P2	0.85033	-0.0719897	6	6	P1P2	0.912842	-0.0396719	7	7	P1P2	0.430914	-0.0558308	4	4	P1P2	0.469747	0.101964	9	9	P1P2	0.143131	0.0265517	7	7	P1P2	0.15547	0.14999	7	7	P1P2	0.494134	0.680242	6	6	P1P2	0.449487	0.746226	6	6	P1P2	0.208284	0.791257	4	4
FASTKD5	P1P2	0.0205634	-0.142864	6	6	P1P2	0.717521	-0.0415366	5	5	P1P2	0.156058	-0.055881	4	4	P1P2	0.575477	0.0874513	8	8	P1P2	0.14974	0.173953	7	7	P1P2	0.122473	0.149843	7	7	P1P2	0.253462	-1.36157	7	7	P1P2	0.0957926	1.00975	6	6	P1P2	0.474176	0.334568	4	4
HTR2B	P1P2	0.644222	0.0222104	3	3	P1P2	0.890733	-0.0103029	1	1	P1P2	0.32868	-0.0495682	1	1	P1P2	0.111132	0.183728	1	1	P1P2	0.73821	0.0220951	3	3	P1P2	0.111877	0.149415	1	1	P1P2	0.731535	-0.258831	2	2	P1P2	0.871482	-0.0965968	3	3	P1P2	0.198493	0.833313	1	1
MRPS17	P1P2	0.412082	0.063988	1	1	P1P2	0.0428345	-0.150289	2	2						P1P2	0.413609	0.0445895	2	2	P1P2	0.00746394	0.203749	3	3	P1P2	0.111877	0.14939	1	1	P1P2	0.325381	-0.488006	2	2	P1P2	0.440878	0.465352	2	2
pseudo_12609	pseudo_transcript_0	0.863722	-0.0261532	5	5	pseudo_transcript_0	0.597793	-0.0348175	4	4	pseudo_transcript_0	0.607156	-0.0297489	3	3	pseudo_transcript_0	0.913305	0.031308	6	6	pseudo_transcript_0	0.100782	0.121692	2	2	pseudo_transcript_0	0.112211	0.149312	1	1	pseudo_transcript_0	0.21089	-0.57353	4	4	pseudo_transcript_0	0.933874	0.0408224	2	2	pseudo_transcript_0	0.784237	-0.11081	1	1
pseudo_17277	pseudo_transcript_0	0.633782	0.0224762	6	6	pseudo_transcript_0	0.61555	-0.0571359	6	6	pseudo_transcript_0	0.722065	-0.0346468	5	5	pseudo_transcript_0	0.941488	0.0145093	3	3	pseudo_transcript_0	0.569466	0.0416997	5	5	pseudo_transcript_0	0.112211	0.149312	1	1	pseudo_transcript_0	0.817281	0.335334	5	5	pseudo_transcript_0	0.909118	-0.179373	5	5	pseudo_transcript_0	0.571292	-0.202625	2	2
pseudo_2913	pseudo_transcript_1	0.333972	-0.0801861	2	2	pseudo_transcript_0	0.200223	0.0648623	3	3	pseudo_transcript_1	0.0988711	-0.144148	1	1	pseudo_transcript_1	0.319836	0.0641069	3	3	pseudo_transcript_1	0.848315	-0.0175154	5	5	pseudo_transcript_1	0.112211	0.149312	1	1	pseudo_transcript_1	0.361304	0.216922	6	6	pseudo_transcript_1	0.680515	0.204751	5	5	pseudo_transcript_0	0.181138	0.536075	2	2
pseudo_9386	pseudo_transcript_0	0.337504	-0.0798625	2	2	pseudo_transcript_0	0.721561	-0.0170736	3	3	pseudo_transcript_0	0.0988711	-0.144148	1	1	pseudo_transcript_0	0.965848	0.0199448	4	4	pseudo_transcript_0	0.655698	-0.0812886	4	4	pseudo_transcript_0	0.112211	0.149312	1	1	pseudo_transcript_0	0.275614	0.967694	5	5	pseudo_transcript_0	0.24502	-0.954575	3	3	pseudo_transcript_0	0.717797	-0.231901	3	3
SNX6	P1P2	0.654831	-0.0355469	4	4	P1P2	0.528905	-0.0346016	3	3	P1P2	0.153997	-0.0519854	2	2	P1P2	0.720623	0.0165227	3	3	P1P2	0.0363397	0.199042	2	2	P1P2	0.112547	0.149303	1	1	P1P2	0.943276	0.148101	2	2	P1P2	0.70332	0.287266	1	1
BTBD1	P1P2	0.396209	0.0187686	5	5	P1P2	0.60489	-0.048457	5	5	P1P2	0.641987	-0.0246527	3	3	P1P2	0.169867	0.0399359	7	7	P1P2	0.0796734	0.230646	8	8	P1P2	0.236553	0.14928	6	6	P1P2	0.262334	0.453915	6	6	P1P2	0.134249	0.729556	4	4	P1P2	0.263511	0.58461	3	3
TXNIP	P1	0.0203521	-0.188075	5	5	P1	0.0178146	-0.192328	5	5	P1	0.0165834	-0.117903	3	3	P1	0.0992147	0.12641	4	4	P1	0.00653437	0.178778	7	7	P1	0.0321977	0.149098	4	4	P2	0.144736	-1.14429	5	5	P2	0.0164947	-1.43109	4	4	P2	0.0536279	-0.848635	3	3
PRR15L	P1P2	0.280759	0.050959	4	4	P1P2	0.155987	-0.141014	6	6	P1P2	0.909797	0.0213722	4	4	P1P2	0.79895	0.0726729	5	5	P1P2	0.00803859	0.227156	7	7	P1P2	0.0392221	0.14904	5	5	P1P2	0.156847	1.1357	3	3	P1P2	0.0224972	1.32592	5	5	P1P2	0.0504132	1.41805	2	2
SGCZ	P1P2	0.499397	-0.038271	5	5	P1P2	0.122994	-0.178537	5	5	P1P2	0.0379497	-0.0802524	3	3	P1P2	0.42982	0.0565096	2	2	P1P2	0.171703	0.136304	4	4	P1P2	0.112547	0.149038	1	1	P1P2	0.934309	-0.0727527	2	2	P1P2	0.589642	-0.623851	4	4	P1P2	0.163139	-0.870596	2	2
pseudo_16871	pseudo_transcript_0	0.506769	-0.0604625	5	5	pseudo_transcript_0	0.661718	-0.0151167	4	4	pseudo_transcript_0	0.340502	-0.0478643	1	1	pseudo_transcript_0	0.398941	0.110799	5	5	pseudo_transcript_0	0.109756	0.146622	5	5	pseudo_transcript_0	0.11633	0.148932	5	5	pseudo_transcript_0	0.903316	0.0119953	6	6	pseudo_transcript_0	0.091467	2.01397	1	1	pseudo_transcript_0	0.149295	1.04183	1	1
pseudo_14147	pseudo_transcript_0	0.847321	0.00812503	5	5	pseudo_transcript_0	0.527661	-0.0335072	3	3	pseudo_transcript_0	0.0973955	-0.147534	1	1	pseudo_transcript_0	0.227378	0.0544574	6	6	pseudo_transcript_0	0.122906	0.15608	4	4	pseudo_transcript_0	0.112883	0.148887	1	1	pseudo_transcript_0	0.456952	0.387236	6	6	pseudo_transcript_0	0.362626	0.728306	1	1	pseudo_transcript_0	0.15747	0.993898	1	1
pseudo_14445	pseudo_transcript_0	0.660672	0.0332624	1	1	pseudo_transcript_0	0.21275	0.0563525	3	3	pseudo_transcript_0	0.351654	0.0588375	1	1	pseudo_transcript_0	0.620561	0.0274439	3	3	pseudo_transcript_0	0.210117	0.153525	2	2	pseudo_transcript_0	0.112883	0.148887	1	1	pseudo_transcript_0	0.324343	-0.595348	2	2	pseudo_transcript_0	0.305725	-0.770373	2	2	pseudo_transcript_0	0.270769	-0.703582	1	1
pseudo_2721	pseudo_transcript_0	0.826773	0.0133414	2	2											pseudo_transcript_0	0.693027	-0.0202781	2	2	pseudo_transcript_0	0.891094	0.045338	2	2	pseudo_transcript_0	0.112883	0.148887	1	1	pseudo_transcript_0	0.490389	-0.340238	2	2	pseudo_transcript_0	0.43083	0.624838	1	1	pseudo_transcript_0	0.834526	0.126268	1	1
RTDR1	P1P2	0.961518	-0.00067758	3	3	P1P2	0.15332	-0.108949	2	2	P1P2	0.289791	-0.0543935	2	2	P1P2	0.585018	-0.0340344	3	3	P1P2	0.741759	0.0387264	2	2	P1P2	0.11322	0.148762	1	1	P1P2	0.578921	-0.275703	6	6	P1P2	0.961591	0.0120546	3	3	P1P2	0.864412	-0.0232795	3	3
pseudo_3106	pseudo_transcript_1	0.0173552	0.168657	3	3	pseudo_transcript_0	0.187012	-0.104065	5	5	pseudo_transcript_0	0.0946133	-0.0967511	5	5	pseudo_transcript_0	0.0730614	0.0969564	4	4	pseudo_transcript_0	0.149535	0.131397	3	3	pseudo_transcript_0	0.0438068	0.148738	2	2	pseudo_transcript_1	0.16352	1.09715	3	3	pseudo_transcript_1	0.212745	-0.802094	3	3	pseudo_transcript_0	0.530854	0.370086	1	1
EXOC3	P1P2	0.927723	0.0159217	5	5	P1P2	0.577262	0.0261801	3	3	P1P2	0.508111	-0.0320291	3	3	P1P2	0.230578	0.0797853	4	4	P1P2	0.0305936	0.238295	6	6	P1P2	0.012661	0.148694	3	3	P1P2	0.816533	0.922154	7	7	P1P2	0.157849	0.680966	3	3	P1P2	0.95523	0.00436796	3	3
pseudo_2755	pseudo_transcript_0	0.74269	-0.00298036	6	6	pseudo_transcript_0	0.64344	-0.0276699	5	5	pseudo_transcript_0	0.306174	-0.0251749	4	4	pseudo_transcript_0	0.0883144	0.134703	5	5	pseudo_transcript_0	0.388669	0.0583744	3	3	pseudo_transcript_0	0.0244162	0.148574	2	2	pseudo_transcript_0	0.0228035	1.20344	4	4	pseudo_transcript_0	0.0367879	1.41678	2	2	pseudo_transcript_0	0.0241606	1.42831	2	2
MIR205HG	P2	0.496296	0.0122206	5	5	P1	0.690124	-0.0807443	6	6	P1	0.260754	-0.0553427	3	3	P1	0.537772	-0.0637252	7	7	P1	0.0215945	0.236778	8	8	P1	0.224825	0.148506	7	7	P2	0.422438	0.330489	5	5	P1	0.0550194	0.408414	7	7	P2	0.144214	1.09768	1	1
MIA	P2	0.0151138	0.199958	3	3	P2	0.0289716	0.133675	4	4	P2	0.0845654	0.253043	1	1	P2	0.188912	-0.09933	6	6	P1	0.520018	-0.0399221	9	9	P1	0.44522	0.148438	9	9	P1	0.546581	-0.752644	10	10	P2	0.241778	0.583334	4	4	P2	0.543062	0.189399	3	3
pseudo_9307	pseudo_transcript_0	0.15889	-0.0775539	4	4	pseudo_transcript_0	0.202011	-0.0772172	3	3	pseudo_transcript_0	0.0312109	-0.116337	2	2	pseudo_transcript_0	0.292826	0.0516144	4	4	pseudo_transcript_0	0.0751283	0.179056	3	3	pseudo_transcript_0	0.0263378	0.148364	2	2	pseudo_transcript_0	0.320101	-0.469303	3	3	pseudo_transcript_0	0.279578	0.573267	3	3	pseudo_transcript_0	0.585008	0.224084	2	2
CCR7	P1	0.723474	-0.0104859	3	3	P2	0.0614916	-0.13922	2	2	P2	0.0885676	-0.186466	1	1	P1	0.309068	-0.0504578	3	3	P2	0.144979	0.153514	4	4	P2	0.11322	0.148327	1	1	P2	0.187946	-0.667399	2	2	P1	0.681625	0.274185	2	2	P1	0.278791	0.655265	1	1
pseudo_6983	pseudo_transcript_0	0.16021	-0.122875	3	3	pseudo_transcript_1	0.29236	-0.0738472	4	4	pseudo_transcript_1	0.226499	-0.0446764	3	3	pseudo_transcript_0	0.325232	0.078173	5	5	pseudo_transcript_0	0.438038	0.136293	4	4	pseudo_transcript_0	0.0394063	0.148287	2	2	pseudo_transcript_0	0.197512	-0.707409	3	3	pseudo_transcript_0	0.528314	0.353039	2	2	pseudo_transcript_1	0.106773	-0.68849	3	3
BEX2	P1P2	0.659122	0.012905	3	3	P1P2	0.124735	0.0638883	3	3	P1P2	0.121023	0.113321	1	1	P1P2	0.38264	-0.0565528	2	2	P1P2	0.824372	0.0389312	3	3	P1P2	0.11322	0.148146	1	1	P1P2	0.708114	0.0227675	4	4	P1P2	0.865301	0.0640452	2	2
RPL28	P1P2	0.947822	-0.00329162	2	2	P1P2	0.492847	0.046199	1	1	P1P2	0.678911	0.0291886	1	1	P1P2	0.115445	0.10141	5	5	P1P2	0.733851	0.0693034	2	2	P1P2	0.11322	0.148035	1	1	P1P2	0.835147	0.0730908	4	4	P1P2	0.377951	-0.829144	1	1	P1P2	0.699977	-0.194242	1	1
SLC35E2B	P1P2	0.461634	-0.0146635	7	7	P1P2	0.0676635	-0.10022	6	6	P1P2	0.138569	-0.0833861	5	5	P1P2	0.25071	0.173238	7	7	P1P2	0.244627	0.139672	4	4	P1P2	0.0307956	0.147798	4	4	P1P2	0.979905	0.958735	6	6	P1P2	0.451419	0.935929	5	5	P1P2	0.415125	0.737468	4	4
pseudo_1161	pseudo_transcript_0	0.769159	-0.0205806	5	5	pseudo_transcript_0	0.0972183	-0.160508	4	4	pseudo_transcript_0	0.138984	-0.0905441	3	3	pseudo_transcript_0	0.110591	0.0569535	5	5	pseudo_transcript_0	0.102792	0.217535	6	6	pseudo_transcript_0	0.0657569	0.147749	4	4	pseudo_transcript_0	0.813167	0.743693	3	3	pseudo_transcript_0	0.699397	0.0935655	5	5	pseudo_transcript_0	0.852472	0.381685	3	3
TCF4	P1P2	0.0110806	-0.117235	4	4	P1P2	0.723936	-0.0234824	3	3	P1P2	0.277607	-0.0580407	1	1	P1P2	0.276	0.0823215	4	4	P1P2	0.0545083	0.161296	2	2	P1P2	0.11322	0.147719	1	1	P1P2	0.279763	-0.609062	4	4	P1P2	0.0305197	0.996842	4	4	P1P2	0.419776	0.361009	4	4
pseudo_3140	pseudo_transcript_0	0.2942	-0.0302722	5	5	pseudo_transcript_1	0.0572831	0.0919916	4	4	pseudo_transcript_0	0.121459	-0.115557	1	1	pseudo_transcript_1	0.84429	0.047971	6	6	pseudo_transcript_0	0.104476	0.14732	3	3	pseudo_transcript_0	0.0253613	0.147674	2	2	pseudo_transcript_1	0.266697	-0.870296	5	5	pseudo_transcript_0	0.670839	0.301936	2	2	pseudo_transcript_1	0.269131	-0.536523	2	2
NADK	P2	0.132946	0.0704676	3	3	P1	0.202206	0.0799676	5	5	P1	0.214493	0.029854	5	5	P1	0.506825	0.115121	8	8	P2	0.142551	0.0343206	6	6	P1	0.18739	0.147318	5	5	P1	0.1795	0.566877	9	9	P1	0.04404	2.58083	6	6	P1	0.0133507	1.68592	6	6
TYSND1	P1P2	0.480635	-0.0524576	6	6	P1P2	0.718941	-0.0904062	7	7	P1P2	0.0861414	-0.105507	5	5	P1P2	0.1488	0.0357772	7	7	P1P2	0.524111	0.0994214	6	6	P1P2	0.0353624	0.147259	5	5	P1P2	0.73321	0.122586	6	6	P1P2	0.626386	0.543713	6	6	P1P2	0.385996	0.241519	5	5
pseudo_2775	pseudo_transcript_0	0.423572	-0.0460814	6	6	pseudo_transcript_0	0.415011	-0.0801211	7	7	pseudo_transcript_0	0.506949	-0.0414897	5	5	pseudo_transcript_0	0.360524	0.0887963	6	6	pseudo_transcript_0	0.054566	0.215253	8	8	pseudo_transcript_0	0.0208908	0.147234	6	6	pseudo_transcript_0	0.86206	0.0472855	4	4	pseudo_transcript_0	0.134636	1.18815	6	6	pseudo_transcript_0	0.151929	0.514963	3	3
DPYSL5	P1P2	0.238256	0.216297	7	7	P1P2	0.111673	0.101328	6	6	P1P2	0.119655	0.106869	4	4	P1P2	0.754075	0.0489639	8	8	P1P2	0.227896	0.0674655	7	7	P1P2	0.0944144	0.147233	6	6	P1P2	0.816825	1.65898	7	7	P1P2	0.0366996	1.67788	5	5	P1P2	0.163946	1.34854	4	4
pseudo_12369	pseudo_transcript_0	0.0120962	-0.216414	7	7	pseudo_transcript_1	0.211924	0.08541	5	5	pseudo_transcript_0	0.0507948	-0.100556	4	4	pseudo_transcript_0	0.00705584	0.225372	7	7	pseudo_transcript_1	0.432045	-0.0271134	4	4	pseudo_transcript_0	0.0154773	0.14715	6	6	pseudo_transcript_0	0.941381	-0.099996	6	6	pseudo_transcript_0	0.38138	-0.744732	5	5	pseudo_transcript_0	0.43484	-0.483249	5	5
NAPSA	P1P2	0.431254	0.0814628	5	5	P1P2	0.47813	-0.0437947	5	5	P1P2	0.630393	0.0258446	2	2	P1P2	0.904267	-0.067312	6	6	P1P2	0.241334	0.0961747	3	3	P1P2	0.11322	0.147064	1	1	P1P2	0.496838	-0.367696	7	7	P1P2	0.146965	1.37554	1	1
pseudo_18641	pseudo_transcript_0	0.118293	-0.136712	4	4	pseudo_transcript_0	0.95035	0.00466706	6	6	pseudo_transcript_0	0.477087	-0.0200269	3	3	pseudo_transcript_0	0.444556	0.0920515	5	5	pseudo_transcript_0	0.0362949	0.164372	5	5	pseudo_transcript_0	0.0210994	0.147054	4	4	pseudo_transcript_0	0.458027	0.433989	5	5	pseudo_transcript_0	0.0420344	1.23041	5	5	pseudo_transcript_0	0.108602	0.669056	4	4
PSMB2	P1P2	0.269565	-0.058879	2	2	P1P2	0.458137	-0.0380259	2	2	P1P2	0.167783	-0.0484525	2	2	P1P2	0.240899	0.0990553	1	1	P1P2	0.0233017	0.155829	3	3	P1P2	0.11322	0.14701	1	1	P1P2	0.34535	-0.453916	3	3	P1P2	0.158661	0.969083	2	2	P1P2	0.214518	0.787605	1	1
TMEM86B	P1P2	0.167616	-0.0761381	2	2	P1P2	0.0575033	-0.17117	2	2	P1P2	0.0457349	-0.123654	2	2	P1P2	0.014461	0.168619	3	3	P1P2	0.0551763	0.196827	6	6	P1P2	0.00828633	0.146808	3	3	P1P2	0.783274	0.188462	1	1	P1P2	0.925082	0.0313783	2	2	P1P2	0.893514	-0.0292482	1	1
KIAA0196	P1P2	0.613886	-0.0368169	2	2	P1P2	0.449708	-0.0709376	2	2	P1P2	0.0963004	-0.149276	1	1	P1P2	0.536979	0.0254587	3	3	P1P2	0.125513	0.130781	4	4	P1P2	0.11322	0.146528	1	1	P1P2	0.287927	-0.449624	3	3	P1P2	0.851546	0.0901126	2	2	P1P2	0.696975	-0.201711	1	1
PDE6H	P1P2	0.0483554	-0.0988425	4	4	P1P2	0.469122	0.00353553	6	6	P1P2	0.469978	-0.0282114	3	3	P1P2	0.453816	0.0597592	4	4	P1P2	0.414354	-0.00651003	4	4	P1P2	0.11322	0.14644	1	1	P1P2	0.591205	-0.21932	3	3	P1P2	0.409552	0.378492	3	3
pseudo_10999	pseudo_transcript_1	0.106485	0.163046	4	4	pseudo_transcript_1	0.239737	-0.108115	5	5	pseudo_transcript_1	0.0587515	0.0878244	2	2	pseudo_transcript_1	0.17896	0.10783	6	6	pseudo_transcript_1	0.259175	0.113728	3	3	pseudo_transcript_1	0.0260556	0.146425	2	2	pseudo_transcript_1	0.0834035	1.74543	5	5	pseudo_transcript_0	0.244671	-1.12211	4	4	pseudo_transcript_2	0.400157	-0.340423	2	2
pseudo_6116	pseudo_transcript_0	0.858226	0.053937	3	3	pseudo_transcript_0	0.419343	-0.0527452	4	4	pseudo_transcript_0	0.923334	0.0108422	2	2	pseudo_transcript_0	0.174758	0.0784072	2	2	pseudo_transcript_0	0.478466	0.0929038	5	5	pseudo_transcript_0	0.0272006	0.14637	2	2	pseudo_transcript_0	0.961016	0.623095	3	3	pseudo_transcript_0	0.0797308	1.19247	4	4	pseudo_transcript_0	0.0781514	1.20284	2	2
KIF19	P1P2	0.570771	0.0269121	3	3	P1P2	0.670898	-0.0268052	4	4	P1P2	0.463762	-0.0281475	2	2	P1P2	0.169381	0.130646	4	4	P1P2	0.125281	0.118663	2	2	P1P2	0.0779843	0.146303	2	2	P1P2	0.035723	1.39983	2	2	P1P2	0.464737	0.569445	2	2	P1P2	0.0702577	0.984639	2	2
pseudo_6027	pseudo_transcript_0	0.965242	-0.00263023	5	5	pseudo_transcript_0	0.987298	-0.0177885	4	4	pseudo_transcript_0	0.719473	0.00867224	3	3	pseudo_transcript_0	0.241856	0.0936496	5	5	pseudo_transcript_0	0.518286	0.047545	3	3	pseudo_transcript_0	0.0276411	0.146288	2	2	pseudo_transcript_0	0.231201	0.999202	6	6	pseudo_transcript_0	0.662994	0.410662	4	4	pseudo_transcript_0	0.32863	1.0309	4	4
GTF2B	P1P2	0.755247	-0.0245992	2	2	P1P2	0.525276	-0.0461817	1	1	P1P2	0.172157	-0.0874522	1	1	P1P2	0.106132	0.131445	3	3	P1P2	0.00877089	0.210977	3	3	P1P2	0.11322	0.146154	1	1	P1P2	0.619428	0.227707	2	2	P1P2	0.496858	0.39759	2	2	P1P2	0.439793	0.312649	2	2
SLITRK3	P1P2	0.00859034	-0.188454	5	5	P1P2	0.934987	0.00323058	2	2	P1P2	0.0482982	-0.103515	2	2	P1P2	0.0059652	0.198064	7	7	P1P2	0.262723	0.0942018	4	4	P1P2	0.0113258	0.146133	3	3	P1P2	0.193941	-0.521687	5	5	P1P2	0.53679	0.340468	2	2	P1P2	0.73409	-0.111024	2	2
NEIL2	P1P2	0.197028	0.0631362	3	3	P1P2	0.172833	-0.0678715	5	5	P1P2	0.485966	0.0462022	2	2	P1P2	0.260799	0.0403383	4	4	P1P2	0.125765	0.120241	3	3	P1P2	0.11322	0.146099	1	1	P1P2	0.494112	0.807913	5	5	P1P2	0.298383	0.619373	2	2	P1P2	0.602865	0.334459	2	2
C5	P1P2	0.39912	-0.040008	3	3	P1P2	0.57116	0.0270432	2	2						P1P2	0.258711	0.0957718	1	1	P1P2	0.0326932	0.146301	3	3	P1P2	0.11322	0.14606	1	1	P1P2	0.219479	0.628974	2	2	P1P2	0.178304	1.19503	1	1	P1P2	0.21753	0.776368	1	1
pseudo_8672	pseudo_transcript_0	0.0606528	-0.111713	6	6	pseudo_transcript_0	0.420234	-0.0332523	5	5	pseudo_transcript_0	0.111685	-0.0410929	4	4	pseudo_transcript_0	0.00476438	0.172489	6	6	pseudo_transcript_1	0.536233	-0.0801788	5	5	pseudo_transcript_0	0.0214866	0.145968	5	5	pseudo_transcript_0	0.182514	0.931713	8	8	pseudo_transcript_1	0.498026	-0.744793	2	2	pseudo_transcript_0	0.620587	0.225494	4	4
pseudo_2122	pseudo_transcript_0	0.468729	0.0483837	4	4	pseudo_transcript_1	0.0999865	-0.127407	5	5	pseudo_transcript_0	0.101118	0.136315	1	1	pseudo_transcript_1	0.123857	0.0902056	3	3	pseudo_transcript_1	0.14904	0.0655319	6	6	pseudo_transcript_1	0.025637	0.145886	2	2	pseudo_transcript_1	0.149347	1.07458	6	6	pseudo_transcript_1	0.132396	-1.23025	4	4	pseudo_transcript_0	0.122726	1.24421	1	1
pseudo_10061	pseudo_transcript_0	0.894582	0.0148183	5	5	pseudo_transcript_0	0.372284	0.0346069	3	3	pseudo_transcript_0	0.320016	0.0496893	2	2	pseudo_transcript_0	0.454359	0.0241153	4	4	pseudo_transcript_0	0.852916	0.0207695	2	2	pseudo_transcript_0	0.113557	0.145715	1	1	pseudo_transcript_0	0.933738	-0.154697	4	4
pseudo_15569	pseudo_transcript_0	0.40525	-0.0512903	3	3	pseudo_transcript_0	0.503143	-0.0724221	5	5	pseudo_transcript_0	0.739701	-0.0101978	1	1	pseudo_transcript_0	0.66645	0.0241171	3	3	pseudo_transcript_0	0.0697173	0.159265	5	5	pseudo_transcript_0	0.113557	0.145715	1	1	pseudo_transcript_0	0.636848	0.786695	3	3	pseudo_transcript_0	0.505587	0.699299	4	4	pseudo_transcript_0	0.630748	0.278737	1	1
pseudo_18619	pseudo_transcript_0	0.0281808	-0.1565	2	2	pseudo_transcript_0	0.566417	-0.108731	2	2	pseudo_transcript_0	0.0848932	-0.214669	1	1	pseudo_transcript_0	0.40022	0.0431612	3	3	pseudo_transcript_0	0.11603	0.109574	3	3	pseudo_transcript_0	0.113557	0.145715	1	1	pseudo_transcript_0	0.652305	0.152516	4	4	pseudo_transcript_0	0.732885	-0.583953	5	5	pseudo_transcript_0	0.985134	0.0194069	2	2
pseudo_7496	pseudo_transcript_0	0.358991	-0.0511815	3	3	pseudo_transcript_0	0.187596	-0.122685	1	1						pseudo_transcript_0	0.842098	0.00472768	4	4	pseudo_transcript_0	0.047803	0.168098	2	2	pseudo_transcript_0	0.113557	0.145715	1	1	pseudo_transcript_0	0.0965373	-0.914118	2	2	pseudo_transcript_0	0.841831	0.140357	1	1
pseudo_6693	pseudo_transcript_0	0.497198	-0.047528	6	6	pseudo_transcript_0	0.333288	-0.0689385	5	5	pseudo_transcript_0	0.848037	0.00184735	3	3	pseudo_transcript_0	0.259983	0.0580135	5	5	pseudo_transcript_0	0.216784	0.26377	6	6	pseudo_transcript_0	0.0386438	0.145656	4	4	pseudo_transcript_0	0.830097	0.291514	4	4	pseudo_transcript_0	0.0332796	1.37208	5	5	pseudo_transcript_0	0.114616	0.586679	3	3
MOB3C	P1P2	0.725152	0.0168259	4	4	P1P2	0.361671	-0.0713743	1	1	P1P2	0.387472	-0.039509	1	1	P1P2	0.0627818	0.10842	6	6	P1P2	0.0391536	0.182248	3	3	P1P2	0.0104723	0.145146	3	3	P1P2	0.0398152	0.831233	4	4
pseudo_7439	pseudo_transcript_1	0.223656	-0.0963364	4	4	pseudo_transcript_1	0.141133	0.122564	1	1	pseudo_transcript_1	0.340502	-0.0478643	1	1	pseudo_transcript_1	0.0898246	0.126708	6	6	pseudo_transcript_1	0.0220926	0.171511	3	3	pseudo_transcript_1	0.00643423	0.145097	3	3	pseudo_transcript_0	0.317789	-0.391003	6	6	pseudo_transcript_0	0.0901131	-1.14546	5	5	pseudo_transcript_0	0.17851	-0.723573	4	4
EIF1AX	P1P2	0.784149	0.044693	6	6	P1P2	0.00477199	-0.196299	5	5	P1P2	0.019963	-0.0812179	5	5	P1P2	0.700645	0.0193381	4	4	P1P2	0.0168364	0.261494	7	7	P1P2	0.00715683	0.145096	4	4	P1P2	0.56458	0.464003	5	5	P1P2	0.704579	-0.299122	5	5	P1P2	0.267656	0.521395	4	4
PCDHGA5	P1P2	0.023455	-0.16831	7	7	P1P2	0.205053	-0.145325	6	6	P1P2	0.0126907	-0.106232	5	5	P1P2	0.0619615	0.164932	8	8	P1P2	0.0191857	0.172558	8	8	P1P2	0.00291567	0.144734	8	8	P1P2	0.709418	-0.31666	7	7	P1P2	0.967781	-0.234489	6	6	P1P2	0.418522	-0.218938	5	5
MROH7	P1P2	0.30959	0.0483901	3	3	P1P2	0.234202	-0.0547513	3	3	P1P2	0.858781	0.0162584	1	1	P1P2	0.155953	0.077815	4	4	P1P2	0.177445	0.0975178	3	3	P1P2	0.113896	0.144732	1	1	P1P2	0.0590437	1.04195	3	3	P1P2	0.406993	0.355111	3	3	P1P2	0.102966	1.43542	1	1
pseudo_2400	pseudo_transcript_0	0.752506	0.0147809	3	3	pseudo_transcript_0	0.775702	0.0126477	4	4	pseudo_transcript_0	0.427543	-0.0357615	1	1	pseudo_transcript_0	0.224945	0.121751	5	5	pseudo_transcript_0	0.106932	0.101194	4	4	pseudo_transcript_0	0.0546456	0.144727	2	2	pseudo_transcript_0	0.265975	0.535289	2	2	pseudo_transcript_0	0.369221	0.756779	2	2	pseudo_transcript_0	0.7749	0.170352	1	1
pseudo_2234	pseudo_transcript_0	0.391192	0.0715486	6	6	pseudo_transcript_0	0.00865868	0.139871	3	3	pseudo_transcript_0	0.0554019	0.10148	2	2	pseudo_transcript_0	0.92967	0.00316372	5	5	pseudo_transcript_0	0.0552596	0.242331	5	5	pseudo_transcript_0	0.00727983	0.144596	3	3	pseudo_transcript_0	0.95529	0.154911	6	6	pseudo_transcript_0	0.928012	-0.134003	2	2	pseudo_transcript_0	0.665742	-0.231949	1	1
PLBD1	P1P2	0.82239	-0.0103915	2	2	P1P2	0.0939529	-0.217682	1	1	P1P2	0.105343	-0.134287	1	1	P1P2	0.110828	0.0936202	3	3	P1P2	0.0680135	0.161348	6	6	P1P2	0.0348423	0.144395	2	2	P1P2	0.543208	-0.297152	2	2	P1P2	0.928745	-0.0902508	2	2	P1P2	0.380939	-0.540409	1	1
pseudo_8633	pseudo_transcript_0	0.264411	0.115331	3	3	pseudo_transcript_0	0.0353731	-0.177526	8	8	pseudo_transcript_0	0.5984	0.0281173	3	3	pseudo_transcript_0	0.593344	-0.0295109	5	5	pseudo_transcript_0	0.0412097	0.285639	6	6	pseudo_transcript_0	0.014414	0.144207	4	4	pseudo_transcript_0	0.231169	1.14665	4	4	pseudo_transcript_0	0.171052	0.139277	7	7	pseudo_transcript_0	0.0624393	1.12552	3	3
pseudo_10206	pseudo_transcript_0	0.158973	0.0862517	6	6	pseudo_transcript_0	0.0924624	-0.142624	6	6	pseudo_transcript_0	0.616218	-0.0267324	4	4	pseudo_transcript_0	0.483963	0.0568229	4	4	pseudo_transcript_0	0.0140683	0.235859	6	6	pseudo_transcript_0	0.0634031	0.144175	4	4	pseudo_transcript_0	0.316492	0.491295	4	4	pseudo_transcript_0	0.178322	1.32932	5	5	pseudo_transcript_0	0.0564287	0.942756	2	2
pseudo_7129	pseudo_transcript_0	0.437076	0.0454483	3	3	pseudo_transcript_0	0.417709	0.0317953	3	3						pseudo_transcript_0	0.578416	0.0434052	1	1	pseudo_transcript_0	0.702369	-0.00939068	5	5	pseudo_transcript_0	0.114235	0.144048	1	1	pseudo_transcript_0	0.86917	-0.409535	5	5	pseudo_transcript_0	0.107879	-1.20028	2	2	pseudo_transcript_0	0.15055	-0.710796	2	2
pseudo_8584	pseudo_transcript_1	0.111213	-0.0821354	3	3	pseudo_transcript_0	0.0965086	0.0981206	3	3	pseudo_transcript_0	0.238676	-0.0695297	1	1	pseudo_transcript_1	0.290867	0.0511308	3	3	pseudo_transcript_0	0.136679	-0.168769	6	6	pseudo_transcript_1	0.114235	0.144048	1	1	pseudo_transcript_0	0.222935	-0.758216	4	4	pseudo_transcript_1	0.0629594	-1.81483	2	2	pseudo_transcript_1	0.121289	-0.935452	2	2
pseudo_9973	pseudo_transcript_0	0.677449	-0.00304031	6	6	pseudo_transcript_0	0.122637	-0.12299	5	5	pseudo_transcript_0	0.243838	-0.0535914	3	3	pseudo_transcript_0	0.620552	-0.0219997	6	6	pseudo_transcript_0	0.00289728	0.268007	6	6	pseudo_transcript_0	0.0299355	0.143921	3	3	pseudo_transcript_0	0.818448	-0.106315	6	6	pseudo_transcript_0	0.739238	0.201027	4	4	pseudo_transcript_0	0.197786	0.8358	1	1
TMEM14C	P1P2	0.500547	0.0329917	6	6	P1P2	0.936822	-0.00666402	3	3	P1P2	0.941696	0.00885304	2	2	P1P2	0.448165	0.0716962	5	5	P1P2	0.270168	0.0807877	3	3	P1P2	0.114575	0.143853	1	1	P1P2	0.0396928	0.992505	6	6	P1P2	0.528334	0.266713	3	3	P1P2	0.100567	0.57863	3	3
DCUN1D1	P1P2	0.650305	-0.00827232	7	7	P1P2	0.600527	-0.101857	7	7	P1P2	0.617698	0.0102496	5	5	P1P2	0.4604	0.0829717	6	6	P1P2	0.925487	-0.0128842	4	4	P1P2	0.114575	0.143776	1	1	P1P2	0.210239	1.22808	7	7	P1P2	0.736498	0.186119	2	2	P1P2	0.923496	0.0582697	2	2
TMPRSS11D	P1P2	0.304343	-0.0989458	5	5	P1P2	0.783623	-0.0850453	6	6	P1P2	0.63899	-0.0188391	3	3	P1P2	0.193794	0.128203	7	7	P1P2	0.06997	0.0854082	8	8	P1P2	0.0539454	0.143764	6	6	P1P2	0.59665	0.26636	4	4	P1P2	0.848959	-0.00814184	5	5	P1P2	0.97201	0.027956	3	3
IBSP	P1P2	0.829013	0.00742754	3	3	P1P2	0.744098	0.0235152	5	5	P1P2	0.550601	0.0268197	3	3	P1P2	0.0548788	0.10881	3	3	P1P2	0.99009	-0.0370173	5	5	P1P2	0.02648	0.143641	2	2	P1P2	0.565863	-0.319219	2	2	P1P2	0.243859	0.154781	5	5
RNF157	P1P2	0.523145	0.0314519	7	7	P1P2	0.0428886	-0.136358	6	6	P1P2	0.363296	-0.0281349	5	5	P1P2	0.529014	0.0652994	5	5	P1P2	0.342742	0.221972	7	7	P1P2	0.0622197	0.143636	5	5	P1P2	0.886721	0.11302	5	5	P1P2	0.638109	-0.138972	6	6	P1P2	0.630626	0.326729	4	4
RCN2	P1P2	0.10923	-0.117989	5	5	P1P2	0.0114469	-0.166179	6	6	P1P2	0.0129793	-0.126513	4	4	P1P2	0.259873	0.0919528	8	8	P1P2	0.0171434	0.192269	7	7	P1P2	0.0985273	0.143264	6	6	P1P2	0.885323	0.324564	6	6	P1P2	0.884236	-0.185495	5	5	P1P2	0.987885	0.0634479	4	4
PRPS1	P1P2	0.986113	0.0217368	4	4	P1P2	0.127974	-0.166471	1	1						P1P2	0.544085	-0.0539597	4	4	P1P2	0.058953	0.217968	4	4	P1P2	0.0346624	0.143122	2	2	P1P2	0.862967	-0.095958	2	2	P1P2	0.594131	0.389605	2	2
PLCG1	P1P2	0.320669	-0.0684135	4	4	P1P2	0.324412	-0.0547118	4	4	P1P2	0.465329	-0.0227125	2	2	P1P2	0.211537	0.0654761	3	3	P1P2	0.856985	0.0180374	3	3	P1P2	0.114575	0.143066	1	1	P1P2	0.604269	-0.140759	4	4	P1P2	0.0717855	1.12644	2	2	P1P2	0.120286	1.27453	1	1
SMIM5	P1	0.51822	0.116048	5	5	P1	0.923214	0.00254844	3	3	P1	0.174759	0.0628392	3	3	P2	0.312483	0.0586577	4	4	P2	0.15693	0.148725	5	5	P2	0.046044	0.142904	2	2	P1	0.491681	-0.482146	1	1	P2	0.0957377	0.992906	2	2	P2	0.334341	0.552879	1	1
MZB1	P1P2	0.629897	0.0343099	4	4	P1P2	0.709034	-0.0778582	6	6	P1P2	0.841241	-0.040809	4	4	P1P2	0.311404	0.137185	4	4	P1P2	0.65389	0.179253	5	5	P1P2	0.145988	0.142897	3	3	P1P2	0.475578	0.174103	4	4	P1P2	0.971789	-0.0915734	3	3	P1P2	0.413124	0.336297	2	2
TPTE2	ENST00000382977.4	0.232198	-0.0524889	3	3	ENST00000400230.2	0.215792	-0.0691252	3	3	ENST00000382977.4	0.458844	-0.0325686	1	1	ENST00000382977.4	0.472318	0.0559039	2	2	ENST00000400230.2	0.490575	0.0335586	4	4	ENST00000382977.4	0.114575	0.14284	1	1	ENST00000382977.4	0.685602	-0.232027	3	3	ENST00000400230.2	0.400991	0.487793	2	2	ENST00000382977.4	0.164128	0.955239	1	1
pseudo_14175	pseudo_transcript_0	0.569764	0.0390241	4	4	pseudo_transcript_0	0.277344	-0.105727	5	5	pseudo_transcript_0	0.52367	0.028447	3	3	pseudo_transcript_0	0.681729	0.0409739	6	6	pseudo_transcript_0	0.00156456	0.283793	6	6	pseudo_transcript_0	0.0456721	0.142819	4	4	pseudo_transcript_0	0.172682	0.728391	4	4	pseudo_transcript_0	0.010254	1.46601	4	4	pseudo_transcript_0	0.066351	1.0307	2	2
MARS2	P1P2	0.954395	-0.0271249	4	4	P1P2	0.104381	-0.113902	3	3	P1P2	0.0992428	-0.14356	1	1	P1P2	0.465663	-0.0414559	2	2	P1P2	0.0176205	0.2766	2	2	P1P2	0.114575	0.142783	1	1	P1P2	0.498881	-0.328427	3	3	P1P2	0.200037	0.742634	2	2	P1P2	0.853312	0.0987897	2	2
HDDC3	P1P2	0.177292	-0.129107	4	4	P1P2	0.941357	-0.0509545	4	4	P1P2	0.180142	-0.0480372	3	3	P1P2	0.276709	0.0861673	5	5	P1P2	0.216643	0.0573565	6	6	P1P2	0.313087	0.142477	5	5	P1P2	0.414501	-0.146882	5	5	P1P2	0.803994	-0.39169	4	4	P1P2	0.988802	-0.0223273	3	3
RRBP1	P1P2	0.976176	-0.00143575	1	1	P1P2	0.474324	-0.0535565	1	1						P1P2	0.247291	0.0200237	4	4	P1P2	0.146091	0.10037	3	3	P1P2	0.114575	0.142475	1	1	P1P2	0.0931939	-1.21415	2	2	P1P2	0.0637468	1.31102	2	2	P1P2	0.829779	-0.0689799	1	1
pseudo_11963	pseudo_transcript_0	0.419633	0.0660733	5	5	pseudo_transcript_0	0.34961	-0.0929458	6	6	pseudo_transcript_0	0.493784	-0.0361911	4	4	pseudo_transcript_0	0.487348	0.0409639	4	4	pseudo_transcript_0	0.016478	0.0780545	8	8	pseudo_transcript_0	0.0142961	0.142442	4	4	pseudo_transcript_0	0.217032	0.352656	5	5	pseudo_transcript_0	0.0618237	2.09652	6	6	pseudo_transcript_0	0.0282065	1.40667	5	5
C4orf26	P1P2	0.219372	-0.173736	9	9	P1P2	0.534279	-0.0831564	8	8	P1P2	0.64083	-0.0707074	7	7	P1P2	0.370284	0.0720578	10	10	P1P2	0.579621	0.111047	7	7	P1P2	0.292375	0.142385	7	7	P1P2	0.620489	-0.680498	9	9	P1P2	0.124818	1.73602	6	6	P1P2	0.389975	0.540167	5	5
pseudo_11614	pseudo_transcript_0	0.471709	-0.0320277	3	3	pseudo_transcript_0	0.275129	0.0774463	1	1	pseudo_transcript_0	0.848812	-0.00355753	1	1	pseudo_transcript_0	0.664546	0.0812333	5	5	pseudo_transcript_0	0.544462	0.0561937	1	1	pseudo_transcript_0	0.114916	0.142372	1	1	pseudo_transcript_0	0.0956467	1.20307	4	4	pseudo_transcript_0	0.148059	1.36915	1	1	pseudo_transcript_0	0.128739	1.22451	1	1
pseudo_1327	pseudo_transcript_0	0.402427	0.00596725	5	5	pseudo_transcript_0	0.433948	0.0120955	5	5	pseudo_transcript_0	0.90581	0.0102143	3	3	pseudo_transcript_0	0.0226636	0.140324	5	5	pseudo_transcript_0	0.323823	-0.0691304	3	3	pseudo_transcript_0	0.114916	0.142372	1	1	pseudo_transcript_0	0.079182	1.18978	4	4	pseudo_transcript_0	0.895239	-0.0746395	3	3	pseudo_transcript_0	0.128739	1.22451	1	1
pseudo_14339	pseudo_transcript_0	0.0684833	-0.111523	2	2	pseudo_transcript_0	0.21275	0.0553045	3	3	pseudo_transcript_0	0.287458	-0.0416945	2	2	pseudo_transcript_0	0.024141	0.129696	5	5	pseudo_transcript_0	0.253574	0.0616518	3	3	pseudo_transcript_0	0.114916	0.142372	1	1	pseudo_transcript_0	0.914165	0.103566	2	2	pseudo_transcript_0	0.0335109	1.48962	2	2	pseudo_transcript_0	0.128739	1.22451	1	1
pseudo_2892	pseudo_transcript_0	0.785397	-0.0218259	6	6	pseudo_transcript_0	0.717914	-0.0553813	2	2	pseudo_transcript_0	0.848812	-0.00355753	1	1	pseudo_transcript_0	0.55497	0.0661546	6	6	pseudo_transcript_0	0.449669	0.0739442	5	5	pseudo_transcript_0	0.114916	0.142372	1	1	pseudo_transcript_0	0.408669	0.850299	5	5	pseudo_transcript_0	0.914925	-0.457136	4	4	pseudo_transcript_0	0.723322	0.291021	2	2
pseudo_16715	pseudo_transcript_0	0.619619	-0.0544989	10	10	pseudo_transcript_0	0.730146	-0.0233095	6	6	pseudo_transcript_0	0.497829	-0.0212458	6	6	pseudo_transcript_0	0.149082	0.0485727	9	9	pseudo_transcript_0	0.0459895	0.176068	5	5	pseudo_transcript_0	0.00936828	0.142336	5	5	pseudo_transcript_0	0.578114	-0.120903	9	9	pseudo_transcript_0	0.159038	0.836913	4	4	pseudo_transcript_0	0.0695135	0.961006	4	4
BBS2	P1P2	0.0181651	-0.207571	2	2	P1P2	0.0262396	-0.207136	2	2	P1P2	0.0920181	-0.168081	1	1	P1P2	0.982381	0.0357898	4	4	P1P2	0.0681936	0.257225	4	4	P1P2	0.100359	0.1423	2	2	P1P2	0.060842	-0.954994	3	3	P1P2	0.111356	1.05005	2	2	P1P2	0.891693	0.0446129	2	2
NETO1	P1P2	0.643761	-0.0150131	5	5	P1P2	0.915161	-0.00429359	3	3	P1P2	0.740727	-0.00965336	3	3	P1P2	0.131429	0.125599	5	5	P1P2	0.0378503	0.140082	3	3	P1P2	0.115943	0.14223	1	1	P1P2	0.847295	-0.336374	6	6	P1P2	0.259147	0.662893	2	2	P1P2	0.440883	0.429719	1	1
pseudo_16675	pseudo_transcript_0	0.501637	-0.0461813	1	1	pseudo_transcript_0	0.99295	-0.0137704	5	5	pseudo_transcript_0	0.562477	0.0374298	1	1	pseudo_transcript_0	0.0190734	0.159276	3	3	pseudo_transcript_0	0.0828813	0.0773049	7	7	pseudo_transcript_0	0.0630485	0.142189	2	2	pseudo_transcript_0	0.442136	0.367726	2	2	pseudo_transcript_0	0.0559459	1.29766	5	5	pseudo_transcript_0	0.125476	0.690225	2	2
pseudo_13961	pseudo_transcript_0	0.891972	-0.0326626	2	2	pseudo_transcript_0	0.626304	0.0363403	6	6	pseudo_transcript_0	0.632218	0.0428152	2	2	pseudo_transcript_0	0.18818	0.101988	3	3	pseudo_transcript_0	0.172525	0.0345207	5	5	pseudo_transcript_0	0.0283888	0.142145	2	2	pseudo_transcript_0	0.911918	0.0696819	1	1	pseudo_transcript_0	0.325757	0.629416	3	3	pseudo_transcript_0	0.149295	1.04183	1	1
LCE1E	P1P2	0.205657	0.122293	4	4	P1P2	0.964531	0.0109821	4	4	P1P2	0.156232	0.0662179	2	2	P1P2	0.343212	0.171868	6	6	P1P2	0.00703762	0.199522	6	6	P1P2	0.0132176	0.14198	4	4	P1P2	0.12827	0.974924	4	4	P1P2	0.0207627	1.31035	3	3	P1P2	0.0110001	1.11477	3	3
MUC1	P1P2	0.714025	-0.0142114	3	3	P1P2	0.277652	0.0554623	3	3						P1P2	0.475736	0.0423603	6	6	P1P2	0.585808	0.0404472	3	3	P1P2	0.115943	0.141899	1	1	P1P2	0.181877	0.684083	2	2	P1P2	0.382341	0.423473	3	3	P1P2	0.996764	0.0431514	1	1
pseudo_10964	pseudo_transcript_0	0.717019	-0.116645	7	7	pseudo_transcript_0	0.506163	-0.0456425	4	4	pseudo_transcript_0	0.846397	0.00173536	3	3	pseudo_transcript_0	0.890007	0.0665677	6	6	pseudo_transcript_0	0.0595483	0.185744	5	5	pseudo_transcript_0	0.0588648	0.141894	5	5	pseudo_transcript_0	0.900948	-0.172498	7	7	pseudo_transcript_0	0.584876	0.245474	3	3	pseudo_transcript_0	0.567368	0.251847	3	3
RPL21	P1P2	0.75207	0.0109496	3	3	P1P2	0.540821	-0.0466767	4	4	P1P2	0.516998	-0.0397379	2	2	P1P2	0.117142	0.104209	2	2	P1P2	0.0735938	0.17949	2	2	P1P2	0.0483766	0.141849	2	2	P1P2	0.888127	0.412236	5	5	P1P2	0.0672534	1.17771	2	2	P1P2	0.0642591	0.875553	2	2
pseudo_7187	pseudo_transcript_0	0.776732	0.0149265	2	2	pseudo_transcript_1	0.0723616	-0.104465	4	4	pseudo_transcript_1	0.302845	-0.0339751	2	2	pseudo_transcript_1	0.723754	0.014769	5	5	pseudo_transcript_1	0.0883301	0.123648	4	4	pseudo_transcript_0	0.116287	0.141532	1	1	pseudo_transcript_0	0.28204	0.646219	2	2	pseudo_transcript_1	0.552093	0.325565	2	2	pseudo_transcript_0	0.756326	0.184899	1	1
USP27X	P1P2	0.886415	-0.0571274	6	6	P1P2	0.163784	-0.138541	1	1	P1P2	0.647295	-0.0166733	1	1	P1P2	0.271802	0.0409926	7	7	P1P2	0.30783	0.0960277	3	3	P1P2	0.0274936	0.141477	2	2	P1P2	0.12855	1.1345	6	6	P1P2	0.297717	-0.823827	5	5	P1P2	0.840347	-0.175807	4	4
pseudo_18082	pseudo_transcript_0	0.430044	-0.0360123	7	7	pseudo_transcript_0	0.359425	-0.0678999	5	5	pseudo_transcript_0	0.32755	-0.0501496	3	3	pseudo_transcript_0	0.367133	0.0301044	4	4	pseudo_transcript_0	0.464701	0.109248	5	5	pseudo_transcript_0	0.0648512	0.141347	2	2	pseudo_transcript_0	0.873028	-0.133362	4	4	pseudo_transcript_0	0.624245	0.222135	3	3	pseudo_transcript_0	0.530854	0.370086	1	1
NUDCD3	P1P2	0.776732	-0.0624567	2	2	P1P2	0.995952	-8.13132e-05	3	3	P1P2	0.108502	-0.125757	1	1	P1P2	0.0905776	0.244979	1	1	P1P2	0.905562	-0.0481776	6	6	P1P2	0.116632	0.141242	1	1	P1P2	0.143148	1.04886	5	5	P1P2	0.824336	-0.18409	3	3	P1P2	0.428005	0.366075	2	2
pseudo_8348	pseudo_transcript_0	0.698305	-0.0634249	7	7	pseudo_transcript_0	0.509756	-0.0380857	7	7	pseudo_transcript_0	0.113472	-0.0642977	6	6	pseudo_transcript_0	0.50657	0.0664114	7	7	pseudo_transcript_0	0.0733935	0.11072	3	3	pseudo_transcript_0	0.0293091	0.141239	2	2	pseudo_transcript_0	0.969213	0.0179216	6	6	pseudo_transcript_0	0.0359207	1.37843	3	3	pseudo_transcript_0	0.0707031	0.856961	2	2
UBE2O	P1P2	0.869456	0.0199093	6	6	P1P2	0.22293	-0.0619776	3	3	P1P2	0.950778	0.00862989	1	1	P1P2	0.366073	-0.0491916	7	7	P1P2	0.0114282	0.201687	4	4	P1P2	0.020129	0.141231	3	3	P1P2	0.0819066	-0.539748	5	5	P1P2	0.911911	-0.376921	2	2	P1P2	0.0954844	-1.5927	1	1
OTX1	P1P2	0.204713	-0.0942809	3	3	P1P2	0.309871	0.0705104	1	1						P1P2	0.275491	0.0767237	2	2	P1P2	0.0859359	0.180978	4	4	P1P2	0.0280877	0.141153	2	2	P1P2	0.890942	-0.0585673	5	5	P1P2	0.726987	-0.170697	3	3	P1P2	0.49599	-0.27264	2	2
pseudo_12064	pseudo_transcript_0	0.437005	-0.0258434	4	4											pseudo_transcript_0	0.154437	0.0835398	2	2	pseudo_transcript_0	0.0440195	0.151188	3	3	pseudo_transcript_0	0.0299367	0.141148	2	2	pseudo_transcript_0	0.203654	0.857135	6	6	pseudo_transcript_0	0.952159	-0.0551521	1	1	pseudo_transcript_0	0.560511	-0.327855	1	1
SGOL1	P1P2	0.188258	-0.139708	5	5	P1P2	0.673716	-0.0404978	3	3	P1P2	0.024632	-0.102902	3	3	P1P2	0.091157	0.175182	2	2	P1P2	0.30631	0.065524	3	3	P1P2	0.0645479	0.141148	2	2	P1P2	0.0707621	-1.01898	2	2	P1P2	0.0451457	1.32615	2	2	P1P2	0.721175	0.153585	2	2
pseudo_17784	pseudo_transcript_0	0.255775	0.0622202	2	2	pseudo_transcript_0	0.235451	-0.0545635	3	3	pseudo_transcript_0	0.80919	-0.00560699	1	1	pseudo_transcript_0	0.615747	-0.0267921	2	2	pseudo_transcript_0	0.102071	0.181653	5	5	pseudo_transcript_0	0.116977	0.141059	1	1	pseudo_transcript_0	0.25737	0.622718	4	4	pseudo_transcript_0	0.0335312	1.1742	3	3	pseudo_transcript_0	0.0289893	0.898461	3	3
pseudo_2678	pseudo_transcript_0	0.696232	0.00676661	5	5	pseudo_transcript_0	0.249243	-0.0634978	3	3	pseudo_transcript_0	0.194548	-0.0641638	2	2	pseudo_transcript_0	0.915428	-0.00469661	3	3	pseudo_transcript_0	0.740492	0.00899547	5	5	pseudo_transcript_0	0.116977	0.141059	1	1	pseudo_transcript_0	0.419458	0.320965	3	3	pseudo_transcript_0	0.750442	0.281704	2	2	pseudo_transcript_0	0.124705	1.23295	1	1
pseudo_9451	pseudo_transcript_0	0.963751	-0.0105847	7	7	pseudo_transcript_0	0.229731	-0.0662666	2	2	pseudo_transcript_0	0.434552	-0.0225363	2	2	pseudo_transcript_0	0.910281	0.00284059	7	7	pseudo_transcript_0	0.061402	0.143169	3	3	pseudo_transcript_0	0.116977	0.141059	1	1	pseudo_transcript_0	0.868028	0.232687	6	6	pseudo_transcript_0	0.98676	-0.178649	2	2	pseudo_transcript_0	0.980561	-0.0263154	2	2
UTP20	P1P2	0.441407	-0.042218	2	2	P1P2	0.313642	0.0482544	2	2	P1P2	0.68958	-0.0129764	1	1	P1P2	0.0710134	0.136141	2	2	P1P2	0.967079	-0.00113759	2	2	P1P2	0.117324	0.141049	1	1	P1P2	0.782308	-0.0469625	4	4	P1P2	0.116415	-1.46534	2	2	P1P2	0.508496	-0.36259	1	1
FAM213A	P1	0.377185	0.0355831	5	5	P1	0.287357	0.0456286	4	4	P1	0.477736	0.0341508	3	3	P2	0.239923	-0.0215669	7	7	P1	0.151183	0.122276	2	2	P1	0.117324	0.141048	1	1	P2	0.0469824	-1.26049	4	4	P1	0.579535	0.372398	2	2	P2	0.122235	-1.20715	1	1
pseudo_15203	pseudo_transcript_0	0.19075	-0.0640446	4	4	pseudo_transcript_0	0.0307521	-0.135155	4	4	pseudo_transcript_0	0.0920232	-0.0888435	3	3	pseudo_transcript_0	0.0510994	0.212701	4	4	pseudo_transcript_0	0.811491	0.0178408	3	3	pseudo_transcript_0	0.0274936	0.141031	2	2	pseudo_transcript_0	0.16157	-0.916136	2	2	pseudo_transcript_0	0.987393	-0.0383298	3	3	pseudo_transcript_0	0.784237	-0.11081	1	1
pseudo_17838	pseudo_transcript_0	0.711414	0.0274647	5	5	pseudo_transcript_0	0.0991151	-0.127941	4	4	pseudo_transcript_0	0.925373	0.00267331	2	2	pseudo_transcript_0	0.0591706	0.101389	5	5	pseudo_transcript_0	0.417526	0.112312	8	8	pseudo_transcript_0	0.0107612	0.141005	4	4	pseudo_transcript_0	0.436131	1.09966	7	7	pseudo_transcript_0	0.502583	0.263002	3	3	pseudo_transcript_0	0.106864	1.14649	2	2
B3GNT3	P1P2	0.34539	-0.0496639	5	5	P1P2	0.419276	-0.0709596	6	6	P1P2	0.828326	-0.00580027	2	2	P1P2	0.525841	0.185199	9	9	P1P2	0.32542	0.147378	7	7	P1P2	0.0870931	0.140879	7	7	P1P2	0.134712	-1.14688	5	5	P1P2	0.0915821	0.746685	4	4	P1P2	0.458687	-0.291062	2	2
pseudo_6738	pseudo_transcript_0	0.16958	-0.102058	5	5	pseudo_transcript_0	0.785693	0.0111423	2	2	pseudo_transcript_0	0.584732	-0.0212249	1	1	pseudo_transcript_0	0.86614	0.0346457	4	4	pseudo_transcript_0	0.0383745	0.223085	2	2	pseudo_transcript_0	0.0276411	0.140768	2	2	pseudo_transcript_0	0.11406	1.45258	4	4	pseudo_transcript_0	0.843603	0.0848912	2	2	pseudo_transcript_0	0.133922	1.17714	1	1
RXFP4	P1P2	0.0908502	0.102237	2	2	P1P2	0.0315853	-0.166054	2	2	P1P2	0.373666	-0.0414135	1	1	P1P2	0.956834	0.00286216	1	1	P1P2	0.522568	0.0785422	4	4	P1P2	0.117324	0.140705	1	1	P1P2	0.609526	0.281635	2	2	P1P2	0.224289	0.565507	3	3	P1P2	0.198493	0.835427	1	1
DUSP7	P2	0.17947	0.102607	6	6	P1	0.519174	0.0379032	6	6	P1	0.473829	0.0391162	5	5	P2	0.829779	-0.007677	4	4	P2	0.152579	0.130807	3	3	P2	0.117324	0.140639	1	1	P2	0.297551	1.05602	5	5	P1	0.0953136	0.964016	5	5	P1	0.0907288	0.728368	4	4
PAX9	P2	0.267738	0.142174	2	2	P1	0.227769	-0.0663827	4	4	P2	0.183849	-0.0842549	1	1	P1	0.498107	0.0420671	5	5	P2	0.211102	0.108157	4	4	P2	0.117324	0.140639	1	1	P2	0.188419	0.98685	2	2	P2	0.48642	-0.445519	3	3	P1	0.21753	0.779956	1	1
SGSM3	P1P2	0.0420206	-0.154487	3	3	P1P2	0.0989781	-0.125731	5	5	P1P2	0.0885676	-0.184809	1	1	P1P2	0.199235	0.13212	2	2	P1P2	0.294249	0.0797784	2	2	P1P2	0.117324	0.140586	1	1	P1P2	0.0824522	-0.750412	3	3	P1P2	0.977936	-0.0588912	2	2	P1P2	0.32032	-0.615254	1	1
ETNPPL	P1P2	0.995033	-0.0441338	5	5	P1P2	0.894172	-0.00449732	5	5	P1P2	0.433482	-0.0309139	3	3	P1P2	0.0738764	0.203902	5	5	P1P2	0.23101	0.0983529	4	4	P1P2	0.0392065	0.140574	2	2	P1P2	0.0182822	1.30723	5	5	P1P2	0.190702	0.695851	3	3	P1P2	0.0801101	0.886184	2	2
TAT	P1P2	0.652678	-0.0184124	4	4	P1P2	0.119077	0.063266	3	3	P1P2	0.325097	0.0612717	1	1	P1P2	0.641585	0.0324532	5	5	P1P2	0.992159	-0.00596151	2	2	P1P2	0.117324	0.140549	1	1	P1P2	0.325725	0.356219	6	6
LNPEP	P1P2	0.189305	-0.0705635	5	5	P1P2	0.805149	-0.0300734	7	7	P1P2	0.101087	-0.097495	4	4	P1P2	0.795528	0.0383229	5	5	P1P2	0.00991765	0.206018	6	6	P1P2	0.099495	0.14043	2	2	P1P2	0.65202	-0.681908	5	5	P1P2	0.0124008	1.68564	6	6	P1P2	0.374061	0.501866	3	3
pseudo_15571	pseudo_transcript_1	0.836192	-0.0100649	5	5	pseudo_transcript_0	0.7081	0.0399685	4	4	pseudo_transcript_0	0.5527	0.0116539	3	3	pseudo_transcript_1	0.121224	0.121943	7	7	pseudo_transcript_1	0.0197623	0.191153	6	6	pseudo_transcript_1	0.00809638	0.140288	4	4	pseudo_transcript_1	0.114127	0.521833	5	5	pseudo_transcript_1	0.214881	0.762315	4	4	pseudo_transcript_1	0.0292549	1.25631	2	2
KLRC2	P1P2	0.310666	-0.014443	5	5	P1P2	0.35891	-0.102968	5	5	P1P2	0.609354	0.0175337	3	3	P1P2	0.620099	0.0655404	5	5	P1P2	0.19545	0.195643	7	7	P1P2	0.049998	0.140198	5	5	P1P2	0.887954	0.0969285	4	4	P1P2	0.483168	0.471951	5	5	P1P2	0.251712	0.455566	3	3
FBXO25	P1P2	0.0907843	-0.126999	4	4	P1P2	0.655449	0.0186559	5	5	P1P2	0.270647	-0.0428717	3	3	P1P2	0.186197	0.120736	4	4	P1P2	0.141813	0.121903	4	4	P1P2	0.0382202	0.140172	2	2	P1P2	0.859713	0.136132	4	4	P1P2	0.326127	0.588918	3	3	P1P2	0.544328	0.29074	2	2
pseudo_7643	pseudo_transcript_0	0.194828	0.069523	4	4	pseudo_transcript_0	0.974546	0.0273547	5	5	pseudo_transcript_0	0.484908	0.0301811	3	3	pseudo_transcript_0	0.143385	0.0969542	3	3	pseudo_transcript_0	0.838922	0.0896198	6	6	pseudo_transcript_0	0.0272006	0.14005	2	2	pseudo_transcript_0	0.663107	0.251962	4	4	pseudo_transcript_0	0.490832	0.771554	5	5	pseudo_transcript_0	0.124618	0.795676	3	3
pseudo_7294	pseudo_transcript_0	0.431674	0.0420351	3	3	pseudo_transcript_0	0.870155	-0.084279	5	5	pseudo_transcript_0	0.125887	0.108389	1	1	pseudo_transcript_0	0.813652	-0.00749448	4	4	pseudo_transcript_0	0.0928728	0.218896	5	5	pseudo_transcript_0	0.117671	0.140026	1	1	pseudo_transcript_0	0.653099	0.194449	2	2	pseudo_transcript_0	0.186653	0.604487	3	3
pseudo_8618	pseudo_transcript_0	0.238165	-0.0925288	1	1	pseudo_transcript_0	0.412989	-0.0576651	3	3	pseudo_transcript_0	0.195493	-0.0771668	1	1	pseudo_transcript_0	0.166207	0.0923489	2	2	pseudo_transcript_0	0.498361	0.0417432	6	6	pseudo_transcript_0	0.117671	0.140026	1	1	pseudo_transcript_0	0.219154	0.963544	1	1	pseudo_transcript_0	0.147273	0.934504	2	2
pseudo_13150	pseudo_transcript_0	0.713907	-0.0198324	2	2	pseudo_transcript_0	0.478754	0.0311064	3	3	pseudo_transcript_0	0.347911	0.0590923	1	1	pseudo_transcript_0	0.0610698	0.127007	2	2	pseudo_transcript_0	0.370807	-0.0605255	4	4	pseudo_transcript_0	0.118368	0.139851	1	1	pseudo_transcript_0	0.16157	0.72262	2	2	pseudo_transcript_0	0.703956	0.194075	3	3	pseudo_transcript_0	0.815576	0.145052	1	1
pseudo_16547	pseudo_transcript_0	0.774575	0.0351849	2	2	pseudo_transcript_0	0.129402	-0.0905144	2	2						pseudo_transcript_0	0.558842	0.044329	4	4	pseudo_transcript_0	0.105729	0.135079	4	4	pseudo_transcript_0	0.118368	0.139851	1	1	pseudo_transcript_0	0.736842	0.249048	2	2	pseudo_transcript_0	0.678247	0.227008	2	2
pseudo_2074	pseudo_transcript_0	0.751587	-0.0245011	1	1	pseudo_transcript_0	0.535385	-0.0426885	4	4						pseudo_transcript_0	0.0335426	0.15425	2	2	pseudo_transcript_0	0.236853	0.0769251	3	3	pseudo_transcript_0	0.118368	0.139851	1	1	pseudo_transcript_0	0.1134	0.716942	3	3	pseudo_transcript_0	0.702671	-0.489146	4	4	pseudo_transcript_0	0.137953	0.626053	2	2
pseudo_4491	pseudo_transcript_0	0.394725	0.0336168	5	5	pseudo_transcript_0	0.750237	-0.0105756	3	3	pseudo_transcript_0	0.403539	0.0599805	2	2	pseudo_transcript_0	0.956588	0.0312383	6	6	pseudo_transcript_0	0.244437	0.12219	1	1	pseudo_transcript_0	0.118368	0.139851	1	1	pseudo_transcript_0	0.83165	-0.171685	4	4	pseudo_transcript_0	0.737889	-0.196354	2	2
pseudo_18071	pseudo_transcript_0	0.729077	0.0206929	3	3	pseudo_transcript_0	0.408542	-0.063415	1	1	pseudo_transcript_0	0.349779	-0.0456357	1	1	pseudo_transcript_0	0.985257	0.0565938	4	4	pseudo_transcript_0	0.115732	0.122052	2	2	pseudo_transcript_0	0.0406235	0.139814	2	2	pseudo_transcript_0	0.42069	-0.39953	2	2	pseudo_transcript_0	0.278437	0.904096	1	1	pseudo_transcript_0	0.610704	0.294438	1	1
pseudo_16096	pseudo_transcript_0	0.547031	-0.088731	4	4	pseudo_transcript_0	0.192635	-0.0963149	2	2	pseudo_transcript_0	0.831778	0.0173943	1	1	pseudo_transcript_0	0.0026676	0.195991	7	7	pseudo_transcript_0	0.372294	0.0548761	4	4	pseudo_transcript_0	0.0149553	0.139751	4	4	pseudo_transcript_0	0.256857	0.337695	5	5	pseudo_transcript_0	0.416679	-0.519668	2	2	pseudo_transcript_0	0.651067	0.265479	1	1
RPS21	P1P2	0.37526	0.0463231	4	4	P1P2	0.475003	-0.0531641	1	1	P1P2	0.525136	-0.026197	1	1	P1P2	0.377304	-0.0532296	3	3	P1P2	0.967131	0.0625158	4	4	P1P2	0.118717	0.139733	1	1	P1P2	0.282875	-0.619813	4	4	P1P2	0.0519714	-1.71548	2	2	P1P2	0.291588	-0.659529	1	1
ARPP19	P1P2	0.784153	0.0402101	5	5	P1P2	0.221275	-0.0682098	4	4	P1P2	0.664645	0.0191085	3	3	P1P2	0.955205	0.0469657	7	7	P1P2	0.0655422	0.191166	6	6	P1P2	0.251203	0.139562	6	6	P1P2	0.555887	0.585422	5	5	P1P2	0.844556	0.21666	4	4	P1P2	0.277752	0.558944	3	3
CNTROB	P1P2	0.952019	0.0135248	4	4	P1P2	0.271497	-0.0574884	4	4	P1P2	0.795106	0.00199589	3	3	P1P2	0.546619	-0.00525938	6	6	P1P2	0.121085	0.125406	6	6	P1P2	0.0627784	0.139556	5	5	P1P2	0.792133	0.469208	5	5	P1P2	0.96459	-0.12298	3	3	P1P2	0.215051	-0.623921	2	2
TBRG4	P1P2	0.61082	0.0255988	3	3	P1P2	0.510337	-0.0480645	1	1	P1P2	0.456645	-0.0336379	1	1	P1P2	0.912074	-0.00841746	4	4	P1P2	0.0458993	0.179379	5	5	P1P2	0.0332512	0.139544	2	2	P1P2	0.596379	-0.216071	3	3	P1P2	0.113337	1.68535	1	1	P1P2	0.302866	0.598966	1	1
CAPRIN2	P1P2	0.436413	0.043933	2	2	P1P2	0.464201	-0.0550991	1	1						P1P2	0.128909	0.152613	2	2	P1P2	0.836766	0.00781281	4	4	P1P2	0.118717	0.139494	1	1	P1P2	0.107599	-1.25528	4	4	P1P2	0.398751	0.674582	1	1	P1P2	0.211537	-0.865887	1	1
pseudo_1739	pseudo_transcript_0	0.0756642	-0.123659	5	5	pseudo_transcript_0	0.735203	0.00385691	6	6	pseudo_transcript_0	0.0966411	-0.0696535	4	4	pseudo_transcript_0	0.165224	0.108811	4	4	pseudo_transcript_0	0.068931	0.197107	6	6	pseudo_transcript_0	0.00709586	0.139492	3	3	pseudo_transcript_0	0.898977	0.0646557	4	4	pseudo_transcript_0	0.493769	0.754694	5	5	pseudo_transcript_0	0.141799	0.774005	2	2
GPR22						P1P2	0.0374145	-0.12028	4	4						P1P2	0.564708	0.0501876	2	2	P1P2	0.102377	0.132363	4	4	P1P2	0.118717	0.139236	1	1	P1P2	0.467209	0.349113	2	2	P1P2	0.895846	0.064306	2	2
COX7A1	P1P2	0.618086	-0.0214648	3	3	P1P2	0.23271	-0.085135	3	3						P1P2	0.184193	0.0859565	3	3	P1P2	0.848597	-0.0143688	3	3	P1P2	0.118717	0.139175	1	1	P1P2	0.853069	0.264718	4	4	P1P2	0.733719	0.219348	2	2	P1P2	0.197081	-0.909168	1	1
pseudo_2774	pseudo_transcript_0	0.973131	0.0112294	6	6	pseudo_transcript_0	0.229237	-0.107253	1	1	pseudo_transcript_0	0.0988711	-0.144148	1	1	pseudo_transcript_0	0.247976	0.169821	6	6	pseudo_transcript_0	0.604397	0.0940412	4	4	pseudo_transcript_0	0.00974866	0.13917	3	3	pseudo_transcript_0	0.398741	-0.343931	4	4	pseudo_transcript_0	0.575756	-0.379672	2	2	pseudo_transcript_0	0.294761	-0.464593	2	2
RSL1D1	P1	0.0320252	-0.166611	2	2	P1	0.780322	0.0134843	2	2	P1	0.18505	-0.0833307	1	1	P2	0.506187	0.0710411	4	4	P1	0.843154	-0.0221968	3	3	P2	0.118717	0.139085	1	1	P2	0.0392899	-1.28818	4	4	P1	0.417	-0.709094	4	4	P2	0.131955	-0.527011	3	3
GLRA2	P1P2	0.308224	-0.0468073	3	3	P1P2	0.199624	0.0681071	2	2	P1P2	0.416003	-0.0368662	1	1	P1P2	0.18702	0.075596	2	2	P1P2	0.413966	0.0855387	2	2	P1P2	0.119419	0.139077	1	1	P1P2	0.756046	-0.155835	2	2	P1P2	0.641488	0.361489	1	1
pseudo_15746	pseudo_transcript_0	0.265525	-0.0368785	4	4	pseudo_transcript_0	0.229041	-0.0726615	4	4	pseudo_transcript_0	0.817643	0.0188134	1	1	pseudo_transcript_0	0.541241	-0.0829255	2	2	pseudo_transcript_0	0.183156	0.107171	4	4	pseudo_transcript_0	0.119771	0.139041	1	1	pseudo_transcript_0	0.173726	1.15391	1	1	pseudo_transcript_0	0.587846	0.443336	4	4	pseudo_transcript_0	0.102538	1.4355	1	1
pseudo_4218	pseudo_transcript_0	0.509619	0.0557827	5	5	pseudo_transcript_0	0.128945	-0.0640357	5	5	pseudo_transcript_0	0.540674	0.00771456	4	4	pseudo_transcript_0	0.144033	0.145271	5	5	pseudo_transcript_0	0.0853292	0.203395	7	7	pseudo_transcript_0	0.059936	0.138721	5	5	pseudo_transcript_0	0.0305259	0.950206	4	4	pseudo_transcript_0	0.641269	0.0610941	5	5	pseudo_transcript_0	0.0378715	0.805653	4	4
TFAP2A	P1	0.0681158	-0.0960619	3	3	P2	0.0976605	-0.103012	2	2	P1	0.802425	-0.00283655	2	2	P1	0.351815	0.0562573	2	2	P2	0.00594057	0.222307	5	5	P2	0.0535645	0.138639	4	4	P2	0.387301	-0.901718	5	5	P2	0.0461438	1.28036	2	2	P1	0.918944	0.0510821	2	2
pseudo_6975	pseudo_transcript_0	0.638466	-0.028917	3	3	pseudo_transcript_0	0.0223517	-0.127759	4	4	pseudo_transcript_0	0.0629912	-0.0932702	2	2	pseudo_transcript_0	0.195054	0.105518	4	4	pseudo_transcript_0	0.0408514	0.180347	4	4	pseudo_transcript_0	0.0346624	0.1384	2	2	pseudo_transcript_0	0.777419	-0.103331	5	5	pseudo_transcript_0	0.278704	0.727945	2	2	pseudo_transcript_0	0.252127	0.482377	2	2
pseudo_3323	pseudo_transcript_1	0.0425453	0.10293	3	3	pseudo_transcript_0	0.396583	-0.0696734	5	5	pseudo_transcript_0	0.157118	-0.0649054	4	4	pseudo_transcript_1	0.376796	0.0812525	5	5	pseudo_transcript_0	0.196034	0.140336	6	6	pseudo_transcript_0	0.0410855	0.138304	5	5	pseudo_transcript_1	0.0242082	1.03936	4	4	pseudo_transcript_1	0.293181	0.621219	3	3	pseudo_transcript_1	0.105998	1.42172	1	1
GLRX5						P1P2	0.278867	-0.0585509	5	5						P1P2	0.550687	-0.0213389	4	4	P1P2	0.0657106	0.212371	4	4	P1P2	0.120124	0.1383	1	1	P1P2	0.861817	0.202014	5	5	P1P2	0.679538	0.246074	3	3	P1P2	0.316406	0.613037	2	2
MTHFR	P1	0.287901	-0.0732064	5	5	P1	0.0567104	-0.13423	4	4	P1	0.233251	-0.058515	2	2	P1	0.15515	0.145846	6	6	P1	0.0385622	0.247556	8	8	P1	0.0385916	0.138098	6	6	P1	0.776961	-0.324038	4	4	P2	0.178261	0.713418	3	3	P1	0.149868	-1.07431	1	1
GPR116	P2	0.594314	-0.0231938	4	4	P2	0.172995	-0.0772887	2	2	P2	0.483422	-0.0294106	1	1	P1	0.319077	0.0493246	3	3	P2	0.191834	0.0946756	4	4	P1	0.0313914	0.138047	2	2	P1	0.525598	0.360527	2	2	P1	0.45522	-0.559988	2	2	P1	0.380939	0.489633	1	1
EIF4A1	P1P2	0.374162	-0.0519867	6	6	P1P2	0.00624737	-0.15174	4	4	P1P2	0.088622	-0.0698436	2	2	P1P2	0.0363253	0.111988	5	5	P1P2	0.0329244	0.221935	4	4	P1P2	0.0312268	0.138012	2	2	P1P2	0.128346	0.747272	6	6	P1P2	0.651727	0.156535	5	5	P1P2	0.685713	0.150695	3	3
FNDC3B	P1P2	0.889653	-0.0350146	4	4	P1P2	0.403574	-0.0643397	1	1	P1P2	0.106126	-0.132865	1	1	P1P2	0.111583	0.129138	2	2	P1P2	0.482971	0.0658296	1	1	P1P2	0.120124	0.137986	1	1	P1P2	0.800167	-0.175336	1	1	P1P2	0.967749	-0.0424053	1	1	P1P2	0.788917	-0.108871	1	1
RHAG	P1P2	0.119467	0.158865	8	8	P1P2	0.37293	-0.0549933	6	6	P1P2	0.791842	-0.0140471	6	6	P1P2	0.471723	0.0410747	7	7	P1P2	0.554064	0.186578	6	6	P1P2	0.233522	0.137907	5	5	P1P2	0.0262368	1.95947	6	6	P1P2	0.784721	0.0394242	6	6	P1P2	0.689259	0.21183	4	4
SLC34A3	P1P2	0.372631	-0.056068	2	2	P1P2	0.792808	-0.0187455	1	1	P1P2	0.214292	-0.0724622	1	1	P1P2	0.0897007	0.108031	2	2	P1P2	0.209893	0.140595	1	1	P1P2	0.120124	0.137876	1	1	P1P2	0.538321	0.320428	4	4	P1P2	0.189492	1.15968	1	1	P1P2	0.350843	0.530728	1	1
SH3D19	P2	0.17209	0.139844	6	6	P2	0.210482	0.0531655	4	4	P1	0.570347	0.0240688	3	3	P1	0.361888	0.0836537	4	4	P1	0.292837	0.107386	4	4	P1	0.0734971	0.137862	2	2	P1	0.460317	0.511859	4	4	P2	0.502583	0.302776	3	3	P2	0.584125	0.182157	3	3
HNRNPLL	P1P2	0.558007	-0.0209902	4	4	P1P2	0.179253	-0.0646133	3	3	P1P2	0.182476	-0.0568164	2	2	P1P2	0.339723	0.0615921	3	3	P1P2	0.15457	0.121326	2	2	P1P2	0.0313914	0.137788	2	2	P1P2	0.621333	0.428416	3	3	P1P2	0.509283	-0.569403	1	1	P1P2	0.829779	-0.0758295	1	1
B3GNT8	P1P2	0.605286	-0.0567821	7	7	P1P2	0.0957875	-0.154838	4	4	P1P2	0.0169448	-0.169694	2	2	P1P2	0.116176	0.0609512	10	10	P1P2	0.00664577	0.22209	7	7	P1P2	0.00234549	0.137679	7	7	P1P2	0.913166	0.18832	7	7	P1P2	0.521374	0.422636	5	5	P1P2	0.370356	-0.388174	2	2
pseudo_9401	pseudo_transcript_0	0.877092	0.0505308	4	4	pseudo_transcript_0	0.132155	-0.162985	1	1	pseudo_transcript_0	0.433915	0.0488041	1	1	pseudo_transcript_0	0.14851	0.0884735	5	5	pseudo_transcript_0	0.0376455	0.20249	2	2	pseudo_transcript_0	0.0325643	0.137615	2	2	pseudo_transcript_0	0.455769	0.955921	3	3	pseudo_transcript_0	0.421455	0.454367	2	2	pseudo_transcript_0	0.0880666	1.96351	1	1
IKZF4	P1	0.581637	0.0369434	4	4	P1	0.908942	-0.0377459	5	5	P1	0.373891	0.041972	2	2	P1	0.236132	-0.0409538	7	7	P2	0.0807466	0.123784	8	8	P2	0.0565933	0.13757	7	7	P2	0.403245	-0.177308	8	8	P2	0.305622	0.0874159	5	5	P2	0.574521	0.190015	3	3
LDOC1	P1P2	0.355948	-0.0467048	5	5	P1P2	0.398226	-0.158798	5	5	P1P2	0.0773374	-0.0821864	5	5	P1P2	0.352086	0.0901448	6	6	P1P2	0.339969	0.209558	4	4	P1P2	0.145166	0.137516	4	4	P1P2	0.398318	0.429389	6	6	P1P2	0.578273	0.58177	6	6	P1P2	0.390093	0.514947	4	4
OR5K4	ENST00000354924.2	0.0883476	-0.246597	1	1	ENST00000354924.2	0.377069	-0.0493338	2	2						ENST00000354924.2	0.111132	0.183668	1	1	ENST00000354924.2	0.146755	0.103891	2	2	ENST00000354924.2	0.120124	0.137384	1	1	ENST00000354924.2	0.273849	-0.823935	1	1	ENST00000354924.2	0.682301	0.238974	2	2
NPY1R	P1P2	0.524108	-0.0333691	4	4	P1P2	0.0847275	-0.113747	2	2	P1P2	0.107888	-0.0636286	2	2	P1P2	0.750806	-0.00484073	5	5	P1P2	0.485598	-0.0694041	3	3	P1P2	0.120124	0.137346	1	1	P1P2	0.634914	0.208495	2	2	P1P2	0.133304	-1.86878	1	1
PSD	P1	0.0103631	0.164444	3	3	P1	0.554098	-0.0542657	3	3	P1	0.360167	0.0577786	1	1	P2	0.333424	-0.0634758	5	5	P1	0.447305	0.0723902	1	1	P1	0.120124	0.137273	1	1	P1	0.0631674	0.945192	4	4	P1	0.170039	1.23599	1	1	P2	0.0878129	0.801974	2	2
pseudo_169	pseudo_transcript_0	0.914041	0.123176	6	6	pseudo_transcript_0	0.657345	0.0154282	4	4	pseudo_transcript_0	0.805973	0.0544735	4	4	pseudo_transcript_0	0.111425	0.0884944	8	8	pseudo_transcript_0	0.0854563	0.1727	7	7	pseudo_transcript_0	0.0397154	0.137268	7	7	pseudo_transcript_0	0.0395757	2.00839	6	6	pseudo_transcript_0	0.224423	0.74813	4	4	pseudo_transcript_0	0.0679723	1.39795	4	4
FAM177A1	P1P2	0.247398	-0.0905296	1	1	P1P2	0.564691	0.0384098	4	4	P1P2	0.508698	-0.0278627	1	1	P1P2	0.592554	0.0129651	3	3	P1P2	0.0236623	0.150661	3	3	P1P2	0.120124	0.137164	1	1	P1P2	0.160585	-0.625059	3	3	P1P2	0.0228906	1.7745	2	2	P1P2	0.156876	0.994092	1	1
pseudo_14482	pseudo_transcript_0	0.393888	0.130904	6	6	pseudo_transcript_0	0.137626	-0.158543	7	7	pseudo_transcript_0	0.49264	-0.0165769	4	4	pseudo_transcript_0	0.164015	0.0960457	7	7	pseudo_transcript_1	0.164518	-0.0815378	6	6	pseudo_transcript_0	0.0100385	0.137151	5	5	pseudo_transcript_0	0.0109449	1.27122	6	6	pseudo_transcript_0	0.389992	0.697293	5	5	pseudo_transcript_0	0.0741041	0.8387	3	3
pseudo_589	pseudo_transcript_0	0.844365	0.0571053	9	9	pseudo_transcript_0	0.331549	-0.0584558	7	7	pseudo_transcript_0	0.908773	0.0128214	6	6	pseudo_transcript_0	0.352401	0.0665161	8	8	pseudo_transcript_0	0.0261261	0.22879	9	9	pseudo_transcript_0	0.0234071	0.137076	7	7	pseudo_transcript_0	0.256312	1.02561	9	9	pseudo_transcript_0	0.0142107	1.39788	7	7	pseudo_transcript_0	0.0694032	1.34508	7	7
pseudo_8022	pseudo_transcript_0	0.196052	-0.104875	6	6	pseudo_transcript_0	0.323604	-0.080784	4	4	pseudo_transcript_0	0.130789	-0.102121	3	3	pseudo_transcript_0	0.116005	0.114448	5	5	pseudo_transcript_0	0.516022	0.0810502	6	6	pseudo_transcript_0	0.0562099	0.137073	3	3	pseudo_transcript_0	0.542233	-0.249906	5	5	pseudo_transcript_0	0.740222	-0.162759	4	4	pseudo_transcript_0	0.769861	-0.411421	4	4
SMARCA4	P1P2	0.173903	0.0794735	5	5	P1P2	0.42825	-0.0337684	4	4	P1P2	0.93657	0.00203919	3	3	P1P2	0.690077	0.0264682	3	3	P1P2	0.417848	0.0298845	3	3	P1P2	0.0355701	0.137068	2	2	P1P2	0.692613	0.436335	5	5	P1P2	0.177884	1.20285	1	1	P1P2	0.141998	1.10619	1	1
pseudo_16065	pseudo_transcript_0	0.837627	-0.0760782	6	6	pseudo_transcript_0	0.358845	-0.0588108	3	3	pseudo_transcript_0	0.47579	-0.0149436	3	3	pseudo_transcript_0	0.0913471	0.16429	4	4	pseudo_transcript_0	0.242942	0.136635	4	4	pseudo_transcript_0	0.0291539	0.137033	2	2	pseudo_transcript_0	0.35193	0.145178	5	5	pseudo_transcript_0	0.300638	0.696584	4	4	pseudo_transcript_0	0.032595	1.18599	2	2
TAS1R2	ENST00000375371.3	0.155666	-0.0835481	5	5	ENST00000375371.3	0.574289	-0.0254876	6	6	ENST00000375371.3	0.370073	-0.0314595	3	3	ENST00000375371.3	0.250064	0.0566921	4	4	ENST00000375371.3	0.0684742	0.159404	4	4	ENST00000375371.3	0.120124	0.136998	1	1	ENST00000375371.3	0.524679	1.05547	5	5	ENST00000375371.3	0.0650742	1.17223	4	4	ENST00000375371.3	0.0375526	1.37279	2	2
CPLX3	P1P2	0.738194	0.0265233	2	2											P1P2	0.763989	-0.00622728	5	5	P1P2	0.112403	0.21602	1	1	P1P2	0.120124	0.136959	1	1	P1P2	0.559224	0.366371	1	1	P1P2	0.802002	0.122566	2	2
pseudo_2843	pseudo_transcript_0	0.471724	-0.0745921	8	8	pseudo_transcript_0	0.635718	0.00968342	5	5	pseudo_transcript_0	0.977376	-0.0178448	5	5	pseudo_transcript_0	0.223018	0.126666	6	6	pseudo_transcript_0	0.217078	0.116452	4	4	pseudo_transcript_0	0.0285404	0.136916	2	2	pseudo_transcript_0	0.77518	-0.069374	6	6	pseudo_transcript_0	0.88929	0.0257872	3	3	pseudo_transcript_0	0.896227	-0.0873854	2	2
UBR4	P1P2	0.431161	-0.0246508	4	4	P1P2	0.176325	-0.103627	4	4	P1P2	0.0914186	-0.077416	3	3	P1P2	0.29152	0.0604333	2	2	P1P2	0.467386	0.0553228	3	3	P1P2	0.120124	0.136802	1	1	P1P2	0.372572	-0.46537	4	4	P1P2	0.64021	-0.332118	2	2	P1P2	0.514306	-0.241479	2	2
pseudo_1398	pseudo_transcript_0	0.941448	-0.0409804	6	6	pseudo_transcript_0	0.0246411	-0.142579	6	6	pseudo_transcript_0	0.142267	-0.0620061	4	4	pseudo_transcript_0	0.228322	-0.12886	8	8	pseudo_transcript_0	0.0159378	0.278421	4	4	pseudo_transcript_0	0.00882378	0.136786	3	3	pseudo_transcript_0	0.27786	-0.314032	6	6	pseudo_transcript_0	0.401481	0.395297	3	3	pseudo_transcript_0	0.96456	0.0293952	2	2
GSK3B	P1P2	0.275459	0.0363157	8	8	P1P2	0.227628	-0.109522	7	7	P1P2	0.408099	-0.0267696	6	6	P1P2	0.61164	0.0698263	9	9	P1P2	0.342374	0.0297501	6	6	P1P2	0.0748504	0.136686	5	5	P1P2	0.453382	0.99273	7	7	P1P2	0.72019	0.0666501	6	6	P1P2	0.655288	0.440239	4	4
pseudo_18870	pseudo_transcript_0	0.317349	-0.0504523	2	2	pseudo_transcript_0	0.0671194	-0.0873237	4	4	pseudo_transcript_0	0.168575	-0.0491668	2	2	pseudo_transcript_0	0.109693	0.148044	5	5	pseudo_transcript_0	0.019502	0.12519	4	4	pseudo_transcript_0	0.00678505	0.136617	4	4	pseudo_transcript_0	0.902515	-0.0601319	3	3	pseudo_transcript_0	0.626548	0.22142	4	4	pseudo_transcript_0	0.870854	0.0806442	3	3
SRP72	P1P2	0.321466	-0.0740764	1	1	P1P2	0.290189	-0.0460325	3	3	P1P2	0.269652	-0.0593865	1	1	P1P2	0.391743	0.0542694	2	2	P1P2	0.0385791	0.141052	4	4	P1P2	0.120124	0.13632	1	1	P1P2	0.88589	-0.0917462	1	1	P1P2	0.163064	0.814344	2	2
MRPL41	P1P2	0.456156	-0.0406113	2	2											P1P2	0.652084	0.0234339	2	2	P1P2	0.0240152	0.227233	2	2	P1P2	0.120124	0.136278	1	1	P1P2	0.725595	0.107674	4	4	P1P2	0.456334	-0.45642	2	2
pseudo_2047	pseudo_transcript_0	0.33368	-0.0502291	4	4	pseudo_transcript_0	0.221991	-0.0811965	2	2						pseudo_transcript_0	0.494607	0.0925642	2	2	pseudo_transcript_0	0.395296	0.0484348	4	4	pseudo_transcript_0	0.120478	0.136222	1	1	pseudo_transcript_0	0.274286	-0.823878	1	1	pseudo_transcript_0	0.223989	-0.886493	2	2
pseudo_2739	pseudo_transcript_0	0.531553	-0.025694	5	5	pseudo_transcript_0	0.285619	-0.0818015	4	4	pseudo_transcript_0	0.0294829	-0.0924383	3	3	pseudo_transcript_0	0.0712467	0.125265	5	5	pseudo_transcript_0	0.0290334	0.224827	5	5	pseudo_transcript_0	0.0152812	0.136192	3	3	pseudo_transcript_0	0.741339	0.159104	4	4	pseudo_transcript_0	0.58902	0.213642	3	3	pseudo_transcript_0	0.884899	0.0714178	2	2
GAS2L2	P1P2	0.134307	0.110065	4	4	P1P2	0.341194	0.0528833	3	3	P1P2	0.878787	-0.000887108	1	1	P1P2	0.0417256	-0.174217	2	2	P1P2	0.243503	0.157991	4	4	P1P2	0.120832	0.136177	1	1	P1P2	0.162653	-0.607177	3	3	P1P2	0.51077	0.311863	3	3
pseudo_10280	pseudo_transcript_0	0.919934	-0.00395545	3	3	pseudo_transcript_0	0.778227	-0.00591861	4	4	pseudo_transcript_0	0.691471	-0.00493703	3	3	pseudo_transcript_0	0.806051	-0.013479	2	2	pseudo_transcript_0	0.372363	0.078003	6	6	pseudo_transcript_0	0.121188	0.136171	1	1	pseudo_transcript_0	0.0189046	1.69598	4	4	pseudo_transcript_0	0.471256	0.0258584	5	5	pseudo_transcript_0	0.0309977	1.27008	2	2
pseudo_17417	pseudo_transcript_0	0.745146	0.0229532	5	5	pseudo_transcript_0	0.33698	-0.079372	5	5	pseudo_transcript_0	0.630319	-0.0256987	4	4	pseudo_transcript_0	0.258417	0.051628	3	3	pseudo_transcript_0	0.13612	0.134761	2	2	pseudo_transcript_0	0.121188	0.136171	1	1	pseudo_transcript_0	0.644429	0.518159	4	4	pseudo_transcript_0	0.148966	0.718184	3	3	pseudo_transcript_0	0.206687	0.855176	2	2
pseudo_1781	pseudo_transcript_0	0.830289	-0.0265164	4	4	pseudo_transcript_0	0.433711	-0.0603542	4	4	pseudo_transcript_0	0.678544	0.02225	2	2	pseudo_transcript_0	0.416954	0.0800339	4	4	pseudo_transcript_0	0.404154	0.0420919	3	3	pseudo_transcript_0	0.121188	0.136171	1	1	pseudo_transcript_0	0.151363	1.12635	3	3	pseudo_transcript_0	0.896861	-0.513501	4	4	pseudo_transcript_0	0.154662	0.906946	2	2
pseudo_3924	pseudo_transcript_0	0.37407	-0.0239124	5	5	pseudo_transcript_0	0.365634	-0.0343796	5	5	pseudo_transcript_0	0.866122	-0.000569493	3	3	pseudo_transcript_0	0.250621	0.0820164	4	4	pseudo_transcript_0	0.991559	-0.0127334	6	6	pseudo_transcript_0	0.121188	0.136171	1	1	pseudo_transcript_0	0.0171731	1.33428	3	3	pseudo_transcript_0	0.780901	-0.0271271	4	4	pseudo_transcript_0	0.0926954	1.6246	1	1
pseudo_4866	pseudo_transcript_0	0.206565	0.0826744	3	3	pseudo_transcript_1	0.016585	0.0914132	4	4	pseudo_transcript_1	0.194499	0.049239	3	3	pseudo_transcript_1	0.0233872	-0.129277	3	3	pseudo_transcript_1	0.461353	-0.0927871	4	4	pseudo_transcript_0	0.121188	0.136171	1	1	pseudo_transcript_0	0.109708	1.93204	1	1	pseudo_transcript_1	0.0385951	-1.47998	3	3	pseudo_transcript_0	0.0926954	1.6246	1	1
pseudo_9494	pseudo_transcript_0	0.5057	0.069238	7	7	pseudo_transcript_0	0.330736	-0.0776232	1	1	pseudo_transcript_0	0.486828	0.04379	1	1	pseudo_transcript_0	0.409237	-0.0874988	4	4	pseudo_transcript_0	0.116629	0.150119	4	4	pseudo_transcript_0	0.121188	0.136171	1	1	pseudo_transcript_0	0.917918	0.343216	4	4	pseudo_transcript_0	0.153245	1.31717	1	1	pseudo_transcript_0	0.0926954	1.6246	1	1
MT2A	P1P2	0.826026	-0.00866563	4	4	P1P2	0.219183	-0.109136	1	1	P1P2	0.284086	-0.0563717	1	1	P1P2	0.299754	0.0966662	5	5	P1P2	0.0445945	0.175525	4	4	P1P2	0.0172964	0.136096	3	3	P1P2	0.971802	0.10984	4	4	P1P2	0.536182	0.404851	2	2	P1P2	0.583964	0.315579	1	1
TRIM54	P1P2	0.641026	-0.0745728	6	6	P1P2	0.0344589	-0.160065	2	2	P1P2	0.0655791	-0.0855009	2	2	P1P2	0.198293	0.122228	5	5	P1P2	0.240731	0.190614	6	6	P1P2	0.00505672	0.136083	4	4	P1P2	0.244374	0.850329	5	5	P1P2	0.309001	-0.993666	1	1	P1P2	0.370013	0.496683	1	1
PROM1	P2	0.141037	-0.120999	7	7	P1	0.44836	-0.0388804	4	4	P1	0.08719	-0.105771	2	2	P2	0.257457	0.0875443	8	8	P2	0.0433192	0.193474	7	7	P2	0.00594906	0.136013	6	6	P2	0.315751	-0.597847	7	7	P2	0.0605051	1.21722	5	5	P2	0.0935039	0.786579	3	3
FNIP2	P1P2	0.620352	0.00910659	5	5	P1P2	0.472868	-0.0477209	3	3	P1P2	0.855931	-0.00288342	1	1	P1P2	0.847239	0.00884654	5	5	P1P2	0.0334051	0.263167	6	6	P1P2	0.0558012	0.136007	4	4	P1P2	0.850395	0.0349959	3	3	P1P2	0.116858	0.860329	3	3	P1P2	0.398828	-0.508366	1	1
pseudo_7409	pseudo_transcript_1	0.205946	-0.0750709	3	3	pseudo_transcript_0	0.145113	-0.122933	4	4	pseudo_transcript_1	0.0988711	-0.144148	1	1	pseudo_transcript_0	0.116043	0.136559	4	4	pseudo_transcript_0	0.477275	0.0550476	4	4	pseudo_transcript_0	0.0289995	0.135992	2	2	pseudo_transcript_1	0.148076	-0.9109	5	5	pseudo_transcript_1	0.830198	-0.369086	3	3	pseudo_transcript_1	0.16056	-0.963136	2	2
pseudo_7685	pseudo_transcript_0	0.0494712	0.135634	5	5	pseudo_transcript_0	0.590951	0.0259893	4	4	pseudo_transcript_0	0.206274	0.0549924	3	3	pseudo_transcript_0	0.424886	-0.0740024	5	5	pseudo_transcript_1	0.0259397	0.244948	8	8	pseudo_transcript_1	0.110145	0.135939	7	7	pseudo_transcript_0	0.19312	0.704485	4	4	pseudo_transcript_1	0.00303703	1.64654	6	6	pseudo_transcript_1	0.131209	0.708083	4	4
GGCT	P1P2	0.0327728	-0.139791	4	4	P1P2	0.898651	0.0079666	4	4	P1P2	0.0637218	-0.0860543	2	2	P1P2	0.345853	0.0694901	7	7	P1P2	0.350501	0.0645564	6	6	P1P2	0.12799	0.135795	5	5	P1P2	0.749252	-0.564997	4	4	P1P2	0.304249	0.692101	5	5	P1P2	0.727435	-0.150056	3	3
pseudo_3793	pseudo_transcript_0	0.266708	0.0412136	9	9	pseudo_transcript_1	0.0668624	-0.111981	3	3	pseudo_transcript_1	0.645991	0.0305357	1	1	pseudo_transcript_0	0.132308	-0.124691	6	6	pseudo_transcript_1	0.0246362	0.220347	2	2	pseudo_transcript_1	0.0291539	0.135793	2	2	pseudo_transcript_0	0.806473	-0.206249	6	6	pseudo_transcript_1	0.522935	0.299365	3	3	pseudo_transcript_1	0.227526	-0.818377	1	1
pseudo_1454	pseudo_transcript_0	0.625382	-0.0109034	5	5	pseudo_transcript_0	0.162616	0.056524	3	3	pseudo_transcript_0	0.880665	0.00147018	2	2	pseudo_transcript_0	0.143595	0.0959532	4	4	pseudo_transcript_0	0.68221	-0.0710258	2	2	pseudo_transcript_0	0.121901	0.135782	1	1	pseudo_transcript_0	0.325964	0.439466	4	4	pseudo_transcript_0	0.844324	0.0773225	2	2	pseudo_transcript_0	0.975988	0.0629486	2	2
pseudo_3239	pseudo_transcript_0	0.943386	0.0132873	6	6	pseudo_transcript_0	0.908943	-0.0764612	8	8	pseudo_transcript_0	0.627435	0.000502516	5	5	pseudo_transcript_0	0.0326315	0.14705	6	6	pseudo_transcript_0	0.0553684	0.251025	6	6	pseudo_transcript_0	0.014005	0.135721	4	4	pseudo_transcript_0	0.23695	0.525195	6	6	pseudo_transcript_0	0.0437089	1.86431	5	5	pseudo_transcript_0	0.117211	0.849899	2	2
pseudo_4229	pseudo_transcript_0	0.395972	-0.0771449	7	7	pseudo_transcript_0	0.406864	-0.058236	3	3	pseudo_transcript_0	0.114214	-0.0620662	2	2	pseudo_transcript_0	0.17331	0.0768698	8	8	pseudo_transcript_0	0.111885	0.209213	7	7	pseudo_transcript_0	0.0247058	0.135691	6	6	pseudo_transcript_0	0.9871	-0.498267	7	7	pseudo_transcript_0	0.0461438	1.33781	2	2	pseudo_transcript_0	0.288205	0.505516	2	2
RBX1	P1P2	0.544338	0.0427758	6	6	P1P2	0.43392	0.0522536	1	1	P1P2	0.375619	-0.0410275	1	1	P1P2	0.100035	0.0996621	2	2	P1P2	0.029778	0.198279	2	2	P1P2	0.122258	0.135617	1	1	P1P2	0.904113	0.0397099	2	2
pseudo_17158	pseudo_transcript_0	0.150549	-0.0971955	8	8	pseudo_transcript_0	0.951772	0.00961807	8	8	pseudo_transcript_0	0.327624	-0.0775343	7	7	pseudo_transcript_0	0.0426596	0.135403	8	8	pseudo_transcript_0	0.25631	0.0919988	7	7	pseudo_transcript_0	0.0150709	0.135565	6	6	pseudo_transcript_0	0.374058	-0.269971	9	9	pseudo_transcript_0	0.202317	1.0977	6	6	pseudo_transcript_0	0.649183	0.835284	6	6
SOHLH2	ENST00000379881.3	0.156672	0.0738779	7	7	ENST00000379881.3	0.858496	-0.0344753	6	6	ENST00000379881.3	0.458998	-0.0153981	4	4	ENST00000379881.3	0.426267	0.0381684	7	7	ENST00000379881.3	0.851861	0.0265164	7	7	ENST00000379881.3	0.114752	0.13553	6	6	ENST00000379881.3	0.210311	1.20584	5	5	ENST00000379881.3	0.325687	0.28091	8	8	ENST00000379881.3	0.161275	0.886013	5	5
pseudo_3642	pseudo_transcript_0	0.737727	0.0198538	3	3	pseudo_transcript_0	0.119748	-0.144072	4	4	pseudo_transcript_0	0.10983	-0.0621089	3	3	pseudo_transcript_0	0.530598	0.0342835	5	5	pseudo_transcript_0	0.0163302	0.237303	7	7	pseudo_transcript_0	0.0382283	0.135336	4	4	pseudo_transcript_0	0.37927	0.420241	3	3	pseudo_transcript_0	0.113596	1.06563	4	4	pseudo_transcript_0	0.248341	0.589805	3	3
pseudo_10192	pseudo_transcript_0	0.0719892	0.21976	4	4	pseudo_transcript_0	0.447375	-0.0699131	4	4	pseudo_transcript_0	0.737703	0.0622639	2	2	pseudo_transcript_0	0.696975	0.0332758	4	4	pseudo_transcript_0	0.175221	0.0970805	3	3	pseudo_transcript_0	0.122617	0.135311	1	1	pseudo_transcript_0	0.077846	1.97075	5	5	pseudo_transcript_0	0.788411	0.079754	4	4	pseudo_transcript_0	0.338115	0.429045	3	3
pseudo_16235	pseudo_transcript_0	0.914464	-0.00235707	3	3	pseudo_transcript_0	0.599108	-0.0243022	3	3	pseudo_transcript_0	0.212289	-0.0728023	1	1	pseudo_transcript_0	0.624609	-0.0334369	3	3	pseudo_transcript_0	0.476279	0.053208	3	3	pseudo_transcript_0	0.122617	0.135311	1	1	pseudo_transcript_0	0.155204	-0.710658	4	4	pseudo_transcript_0	0.144773	0.691914	3	3	pseudo_transcript_0	0.503274	0.283833	2	2
pseudo_4214	pseudo_transcript_0	0.940477	0.00420759	3	3	pseudo_transcript_0	0.348131	-0.0415659	4	4	pseudo_transcript_0	0.840346	0.0178961	2	2	pseudo_transcript_0	0.376071	0.0511247	2	2	pseudo_transcript_0	0.359925	0.0622482	3	3	pseudo_transcript_0	0.122617	0.135311	1	1	pseudo_transcript_0	0.849556	-0.0967491	4	4	pseudo_transcript_0	0.151435	0.847029	2	2	pseudo_transcript_0	0.368932	0.500204	1	1
pseudo_1438	pseudo_transcript_0	0.865344	0.0183227	4	4	pseudo_transcript_0	0.0216835	-0.154837	4	4	pseudo_transcript_0	0.757397	-0.0644502	3	3	pseudo_transcript_0	0.92974	-0.0500661	7	7	pseudo_transcript_0	0.0461702	0.218277	5	5	pseudo_transcript_0	0.0392039	0.135207	4	4	pseudo_transcript_0	0.847613	0.554434	6	6	pseudo_transcript_0	0.594144	0.269003	4	4	pseudo_transcript_0	0.242636	-0.414423	3	3
pseudo_17841	pseudo_transcript_0	0.996792	0.0207455	3	3	pseudo_transcript_0	0.416254	-0.0510471	3	3	pseudo_transcript_0	0.206272	-0.0444199	2	2	pseudo_transcript_0	0.284227	0.0633503	4	4	pseudo_transcript_0	0.587387	0.0640143	4	4	pseudo_transcript_0	0.123337	0.135064	1	1	pseudo_transcript_0	0.780804	0.479282	2	2	pseudo_transcript_0	0.528917	-0.695872	2	2
pseudo_3422	pseudo_transcript_0	0.967445	-0.00214115	1	1	pseudo_transcript_0	0.340449	-0.140866	5	5						pseudo_transcript_0	0.330968	-0.0646813	4	4	pseudo_transcript_0	0.334549	0.0893637	2	2	pseudo_transcript_0	0.123337	0.135064	1	1	pseudo_transcript_0	0.399542	0.407966	3	3	pseudo_transcript_0	0.314958	0.562459	2	2	pseudo_transcript_0	0.170996	0.915555	1	1
pseudo_748	pseudo_transcript_0	0.212873	0.0362665	4	4	pseudo_transcript_1	0.148415	-0.0776679	3	3	pseudo_transcript_1	0.243045	-0.0678038	1	1	pseudo_transcript_0	0.238633	-0.0540865	9	9	pseudo_transcript_0	0.111437	0.16052	4	4	pseudo_transcript_1	0.123337	0.135064	1	1	pseudo_transcript_0	0.0238347	0.95998	4	4	pseudo_transcript_1	0.598915	0.23167	3	3	pseudo_transcript_0	0.447813	0.397312	3	3
CNIH2	P1	0.349425	-0.0697734	1	1	P2	0.443773	0.0361951	4	4	P1	0.284086	-0.0563749	1	1	P1	0.0164979	0.134893	3	3	P1	0.378673	0.135145	6	6	P1	0.0306535	0.135019	3	3	P2	0.14646	-0.887734	5	5	P2	0.366269	0.609484	4	4	P2	0.942702	0.168704	4	4
pseudo_5818	pseudo_transcript_0	0.597536	0.0437122	6	6	pseudo_transcript_0	0.896092	-0.0567338	7	7	pseudo_transcript_0	0.756313	0.0306169	5	5	pseudo_transcript_0	0.00387818	0.152338	7	7	pseudo_transcript_0	0.386556	0.122914	7	7	pseudo_transcript_0	0.0249387	0.135013	6	6	pseudo_transcript_0	0.0329515	1.7194	8	8	pseudo_transcript_0	0.360213	0.49573	5	5	pseudo_transcript_0	0.106646	1.10315	5	5
ZNF292	P1P2	0.158141	0.070217	5	5	P1P2	0.605192	-0.118988	6	6	P1P2	0.747636	-0.000864406	4	4	P1P2	0.845872	0.01741	7	7	P1P2	0.0608215	0.134672	6	6	P1P2	0.0870327	0.134903	5	5	P1P2	0.372088	0.663651	5	5	P1P2	0.136585	1.74906	5	5	P1P2	0.114885	0.877133	3	3
pseudo_16373	pseudo_transcript_0	0.165557	-0.0708401	6	6	pseudo_transcript_0	0.262742	-0.127602	4	4	pseudo_transcript_0	0.178905	-0.0782341	4	4	pseudo_transcript_0	0.286798	0.0521967	5	5	pseudo_transcript_0	0.139817	0.145467	3	3	pseudo_transcript_0	0.0794091	0.134827	2	2	pseudo_transcript_0	0.409991	-0.355099	6	6	pseudo_transcript_0	0.908346	-0.103229	3	3	pseudo_transcript_0	0.948709	0.00475654	3	3
SAMD15	P1P2	0.0069076	-0.124374	4	4	P1P2	0.670098	-0.0314244	6	6	P1P2	0.0291382	-0.0818072	4	4	P1P2	0.192453	0.050106	5	5	P1P2	0.0488114	0.191444	5	5	P1P2	0.0334076	0.134758	4	4	P1P2	0.304206	-0.620735	5	5	P1P2	0.212636	0.649214	5	5	P1P2	0.585318	0.264105	4	4
pseudo_12921	pseudo_transcript_0	0.102421	-0.126644	2	2	pseudo_transcript_0	0.0420625	0.0947499	4	4	pseudo_transcript_0	0.269258	-0.0412382	2	2	pseudo_transcript_0	0.654757	0.0643708	3	3	pseudo_transcript_0	0.148728	0.171431	5	5	pseudo_transcript_0	0.12406	0.134751	1	1	pseudo_transcript_0	0.699614	0.200599	4	4	pseudo_transcript_0	0.074743	1.52277	2	2	pseudo_transcript_0	0.100773	0.81551	2	2
pseudo_12939	pseudo_transcript_0	0.817902	0.0125	4	4	pseudo_transcript_0	0.258326	0.0552282	2	2	pseudo_transcript_0	0.216309	-0.0723672	1	1	pseudo_transcript_0	0.596694	0.0914941	5	5	pseudo_transcript_0	0.400985	-0.0647325	2	2	pseudo_transcript_0	0.12406	0.134751	1	1	pseudo_transcript_0	0.416787	0.392127	4	4	pseudo_transcript_0	0.979406	-0.0284762	2	2	pseudo_transcript_0	0.406811	0.467698	1	1
pseudo_17820	pseudo_transcript_0	0.194675	-0.110981	2	2	pseudo_transcript_0	0.268636	-0.0465916	4	4	pseudo_transcript_0	0.107888	-0.0629246	2	2	pseudo_transcript_0	0.354579	0.107942	4	4	pseudo_transcript_0	0.928373	-0.00664282	1	1	pseudo_transcript_0	0.12406	0.134751	1	1	pseudo_transcript_0	0.158878	0.619357	3	3	pseudo_transcript_0	0.626376	-0.706067	3	3	pseudo_transcript_0	0.406811	0.467698	1	1
pseudo_4133	pseudo_transcript_0	0.820252	-0.0425394	5	5	pseudo_transcript_0	0.678817	-0.0218404	3	3	pseudo_transcript_0	0.270371	-0.041197	2	2	pseudo_transcript_0	0.193476	0.108979	3	3	pseudo_transcript_0	0.638069	-0.0620138	4	4	pseudo_transcript_0	0.12406	0.134751	1	1	pseudo_transcript_0	0.208359	0.58324	4	4	pseudo_transcript_0	0.896429	-0.00624364	3	3	pseudo_transcript_0	0.647513	0.206509	2	2
SPAG9	P1P2	0.446853	0.0472808	2	2	P1P2	0.141602	-0.0981264	2	2						P1P2	0.0562972	-0.100731	4	4	P1P2	0.160873	0.127147	3	3	P1P2	0.124422	0.134751	1	1	P1P2	0.575024	0.232586	3	3	P1P2	0.740672	0.192446	2	2	P1P2	0.192889	0.843795	1	1
CCDC54	P1P2	0.302254	-0.0636942	5	5	P1P2	0.586518	-0.0563265	5	5	P1P2	0.171406	-0.0449049	4	4	P1P2	0.752251	0.0186241	2	2	P1P2	0.536818	0.0724507	4	4	P1P2	0.12515	0.134707	1	1	P1P2	0.7178	-0.24928	2	2	P1P2	0.765942	-0.178575	4	4	P1P2	0.658388	0.255874	1	1
C18orf54	P1P2	0.707324	-0.022666	4	4	P1P2	0.621781	-0.0675506	5	5	P1P2	0.0942678	-0.0643777	3	3	P1P2	0.267742	0.0811918	3	3	P1P2	0.0351041	0.18812	6	6	P1P2	0.0111068	0.134656	3	3	P1P2	0.278878	-0.655223	4	4	P1P2	0.240993	0.777214	4	4	P1P2	0.459796	0.25517	3	3
TUBB8	P1P2	0.185142	-0.0913658	5	5	P1P2	0.0771807	-0.100971	3	3	P1P2	0.136976	-0.0909096	2	2	P1P2	0.33818	0.13172	6	6	P1P2	0.370807	0.134975	4	4	P1P2	0.164459	0.134589	4	4	P1P2	0.865974	0.190512	4	4	P1P2	0.78707	0.157167	2	2	P1P2	0.099585	1.50795	1	1
CLPSL1	P2	0.0269865	0.203516	8	8	P1	0.889903	0.00153208	5	5	P2	0.587293	-0.0133013	2	2	P1	0.1101	0.139525	4	4	P2	0.527665	-0.0600385	7	7	P1	0.12515	0.134543	1	1	P2	0.23712	1.48212	7	7	P2	0.15174	-1.35339	3	3	P2	0.288205	-0.608877	2	2
ATXN1	P1P2	0.339932	-0.0433238	8	8	P1P2	0.907493	0.0725299	9	9	P1P2	0.440902	-0.015134	8	8	P1P2	0.458215	0.103097	8	8	P1P2	0.293056	0.203643	9	9	P1P2	0.116541	0.134528	8	8	P1P2	0.554952	-0.151053	7	7	P1P2	0.0869531	1.64489	9	9	P1P2	0.0302795	0.956622	7	7
STK24	P1P2	0.405766	-0.0242175	8	8	P1P2	0.569719	-0.0583634	6	6	P1P2	0.0867331	-0.0939588	6	6	P1P2	0.126713	0.165876	8	8	P1P2	0.16986	0.158557	6	6	P1P2	0.0139075	0.134498	6	6	P1P2	0.33778	0.892366	8	8	P1P2	0.929922	-0.0479246	5	5	P1P2	0.493905	0.245025	5	5
LRRC42	P1P2	0.852366	0.00441089	3	3	P1P2	0.755265	-0.00523135	5	5	P1P2	0.791876	-0.000410232	3	3	P1P2	0.429099	0.0369534	3	3	P1P2	0.276377	0.0771274	4	4	P1P2	0.12515	0.134468	1	1	P1P2	0.8797	-0.38196	4	4	P1P2	0.14525	0.954558	4	4	P1P2	0.991995	-0.0311712	2	2
pseudo_14022	pseudo_transcript_0	0.170688	-0.121002	5	5	pseudo_transcript_0	0.543109	-0.0329379	3	3	pseudo_transcript_0	0.192347	-0.0578614	3	3	pseudo_transcript_0	0.521944	0.0760692	6	6	pseudo_transcript_0	0.135277	0.0978017	4	4	pseudo_transcript_0	0.0742085	0.134429	4	4	pseudo_transcript_0	0.113264	-0.695127	4	4	pseudo_transcript_0	0.378633	-0.721477	2	2	pseudo_transcript_0	0.202594	-0.636528	2	2
FAM210B	P1P2	0.33977	-0.0713526	1	1	P1P2	0.687662	-0.0111234	3	3						P1P2	0.0637594	0.118109	2	2	P1P2	0.680904	0.0230927	3	3	P1P2	0.12515	0.134316	1	1	P1P2	0.207046	0.668115	2	2	P1P2	0.856101	-0.25123	3	3
pseudo_8538	pseudo_transcript_0	0.143211	-0.102373	8	8	pseudo_transcript_0	0.944644	-0.0100507	6	6	pseudo_transcript_0	0.396252	-0.041548	5	5	pseudo_transcript_0	0.341143	0.105438	8	8	pseudo_transcript_0	0.0955927	0.195257	6	6	pseudo_transcript_0	0.050698	0.134285	5	5	pseudo_transcript_0	0.597226	-0.313305	10	10	pseudo_transcript_0	0.272664	0.457795	4	4	pseudo_transcript_0	0.933039	0.00519196	4	4
pseudo_12566	pseudo_transcript_0	0.489576	0.0439846	3	3	pseudo_transcript_0	0.750172	-0.0197437	4	4	pseudo_transcript_0	0.800441	-0.00536618	2	2	pseudo_transcript_0	0.593344	-0.0237842	5	5	pseudo_transcript_0	0.958724	0.00343614	2	2	pseudo_transcript_0	0.125515	0.134236	1	1	pseudo_transcript_0	0.271307	0.484423	3	3	pseudo_transcript_0	0.327984	-0.679001	3	3	pseudo_transcript_0	0.288813	0.636405	1	1
pseudo_17819	pseudo_transcript_0	0.603643	0.0480256	4	4	pseudo_transcript_0	0.569525	-0.0690446	4	4	pseudo_transcript_0	0.686705	-0.0109484	4	4	pseudo_transcript_0	0.686245	0.0223949	3	3	pseudo_transcript_0	0.0993011	0.200465	4	4	pseudo_transcript_0	0.125515	0.134236	1	1	pseudo_transcript_0	0.130471	0.990684	5	5	pseudo_transcript_0	0.963234	0.00410146	2	2	pseudo_transcript_0	0.288813	0.636405	1	1
pseudo_2335	pseudo_transcript_0	0.371124	-0.0479533	2	2	pseudo_transcript_0	0.0126093	-0.163799	3	3	pseudo_transcript_0	0.29316	-0.0544275	1	1	pseudo_transcript_0	0.475736	0.0699714	6	6	pseudo_transcript_0	0.186949	0.153241	1	1	pseudo_transcript_0	0.125515	0.134236	1	1	pseudo_transcript_0	0.094593	0.75483	3	3	pseudo_transcript_0	0.652791	-0.485643	2	2	pseudo_transcript_0	0.957707	0.013361	2	2
pseudo_6069	pseudo_transcript_0	0.297958	-0.072133	4	4	pseudo_transcript_0	0.674904	0.0149954	4	4	pseudo_transcript_0	0.879319	0.00270648	3	3	pseudo_transcript_0	0.230538	0.0754283	5	5	pseudo_transcript_0	0.469683	0.0487131	3	3	pseudo_transcript_0	0.125515	0.134236	1	1	pseudo_transcript_0	0.698628	0.143935	6	6	pseudo_transcript_0	0.382751	0.392646	3	3	pseudo_transcript_0	0.972942	-0.0523641	3	3
PNPLA2	P1P2	0.144256	-0.0769939	2	2	P1P2	0.0797626	0.115237	3	3	P1P2	0.759096	-0.0076537	2	2	P1P2	0.346614	0.0916751	3	3	P1P2	0.794534	-0.0230404	3	3	P1P2	0.151069	0.134156	2	2	P1P2	0.362349	0.706254	2	2	P1P2	0.036292	1.5519	2	2	P1P2	0.073425	1.12908	2	2
pseudo_3056	pseudo_transcript_0	0.596922	-0.0665823	7	7	pseudo_transcript_0	0.0385328	-0.141856	6	6	pseudo_transcript_0	0.00387026	-0.101724	5	5	pseudo_transcript_0	0.251924	0.0528673	4	4	pseudo_transcript_0	0.0778023	0.215402	7	7	pseudo_transcript_0	0.0171653	0.134135	4	4	pseudo_transcript_0	0.499246	-0.381351	3	3	pseudo_transcript_0	0.542488	0.215573	6	6	pseudo_transcript_0	0.607635	0.114182	3	3
FAM13A	ENST00000264344.5	0.296767	0.0657251	7	7	ENST00000264344.5	0.839729	-0.0104244	5	5	ENST00000264344.5	0.98626	0.0189763	4	4	ENST00000264344.5	0.598435	0.126146	7	7	ENST00000264344.5	0.161329	0.157635	6	6	ENST00000264344.5	0.128654	0.134128	5	5	ENST00000264344.5	0.0594739	1.64179	6	6	ENST00000264344.5	0.104949	0.71777	4	4	ENST00000264344.5	0.199067	0.750389	3	3
RAB3D	P1P2	0.0883429	0.098199	4	4	P1P2	0.513666	-0.0381469	3	3	P1P2	0.501736	0.0429259	1	1	P1P2	0.832746	0.0449395	5	5	P1P2	0.0566323	0.149735	4	4	P1P2	0.0390075	0.13408	2	2	P1P2	0.364617	0.539704	4	4	P1P2	0.64732	-0.528628	3	3	P1P2	0.170363	-1.00408	1	1
pseudo_14832	pseudo_transcript_0	0.368337	-0.0269089	4	4	pseudo_transcript_0	0.527247	-0.0340896	3	3	pseudo_transcript_0	0.354895	-0.0458284	2	2	pseudo_transcript_0	0.243318	0.120376	5	5	pseudo_transcript_0	0.608927	0.0874052	4	4	pseudo_transcript_0	0.051306	0.133959	2	2	pseudo_transcript_0	0.291196	0.557226	5	5	pseudo_transcript_0	0.0792075	1.07545	2	2	pseudo_transcript_0	0.0927144	0.73949	2	2
UAP1L1	P1P2	0.798542	0.0116154	5	5	P1P2	0.738303	-0.0238518	1	1	P1P2	0.694938	-0.0125517	1	1	P1P2	0.303716	0.140745	5	5	P1P2	0.0900729	0.124603	4	4	P1P2	0.0585635	0.133922	3	3	P1P2	0.992986	-0.270824	8	8	P1P2	0.993756	-0.00579574	1	1	P1P2	0.693977	0.224404	1	1
pseudo_9046	pseudo_transcript_0	0.346801	-0.0490497	2	2	pseudo_transcript_0	0.261107	-0.0733009	4	4	pseudo_transcript_0	0.308424	-0.0528349	1	1	pseudo_transcript_0	0.0861418	0.110888	2	2	pseudo_transcript_0	0.00353587	0.202784	4	4	pseudo_transcript_0	0.0323945	0.133754	2	2	pseudo_transcript_0	0.250534	0.880572	1	1	pseudo_transcript_0	0.0292135	1.16881	3	3
HOXB5	P1P2	0.397018	0.00373835	7	7	P1P2	0.0453386	-0.161213	6	6	P1P2	0.099675	-0.0897255	5	5	P1P2	0.949991	0.0557595	8	8	P1P2	0.133521	0.2108	6	6	P1P2	0.0970596	0.133473	6	6	P1P2	0.585076	0.219614	7	7	P1P2	0.152272	0.93538	5	5	P1P2	0.222529	0.486564	4	4
pseudo_7651	pseudo_transcript_1	0.232422	0.0634805	3	3	pseudo_transcript_1	0.0597419	0.0826593	3	3	pseudo_transcript_1	0.049179	0.100434	2	2	pseudo_transcript_1	0.33007	0.0472956	3	3	pseudo_transcript_0	0.0260098	0.192814	4	4	pseudo_transcript_0	0.0327349	0.13346	2	2	pseudo_transcript_0	0.178526	0.719702	5	5	pseudo_transcript_0	0.417718	0.27927	3	3	pseudo_transcript_0	0.038349	1.09141	2	2
L3MBTL1	P1	0.213205	-0.0845125	2	2	P1	0.238677	0.0425216	7	7	P1	0.619492	-0.01135	2	2	P2	0.30502	0.115369	7	7	P1	0.0715065	-0.159216	6	6	P2	0.0714601	0.133391	7	7	P1	0.464852	0.35101	3	3	P1	0.160833	-1.84219	7	7	P2	0.243108	0.385777	3	3
SLC35E1	P1P2	0.149476	0.141445	1	1	P1P2	0.539392	-0.0427365	2	2	P1P2	0.827532	0.0178385	1	1	P1P2	0.62694	0.0430999	5	5	P1P2	0.895754	0.00574329	4	4	P1P2	0.0315567	0.133299	2	2	P1P2	0.310365	0.786543	2	2	P1P2	0.97573	-0.0388359	2	2	P1P2	0.602865	0.373854	2	2
pseudo_2423	pseudo_transcript_0	0.145614	-0.0784092	2	2	pseudo_transcript_0	0.0812315	-0.119633	5	5	pseudo_transcript_0	0.27361	-0.0583703	1	1	pseudo_transcript_0	0.318705	0.125201	6	6	pseudo_transcript_0	0.269585	0.141332	6	6	pseudo_transcript_0	0.0845895	0.133266	4	4	pseudo_transcript_0	0.321584	-0.492325	2	2	pseudo_transcript_0	0.559169	-0.687253	6	6	pseudo_transcript_0	0.434718	-0.324769	2	2
pseudo_18614	pseudo_transcript_0	0.967256	0.0121266	9	9	pseudo_transcript_0	0.971557	-0.0175244	7	7	pseudo_transcript_0	0.630328	-0.0248481	6	6	pseudo_transcript_0	0.755423	0.0557358	7	7	pseudo_transcript_0	0.118335	0.113443	7	7	pseudo_transcript_0	0.0651863	0.133246	6	6	pseudo_transcript_0	0.348927	-0.188284	7	7	pseudo_transcript_0	0.0057822	1.76557	6	6	pseudo_transcript_0	0.121232	0.681885	6	6
RPS28	P1P2	0.186854	-0.111612	1	1	P1P2	0.226693	0.0896741	1	1						P1P2	0.0845015	0.0889834	3	3	P1P2	0.0860866	0.132441	2	2	P1P2	0.125881	0.133151	1	1	P1P2	0.897421	-0.0982443	2	2
pseudo_16565	pseudo_transcript_0	0.31428	0.124263	8	8	pseudo_transcript_0	0.0798977	-0.158981	7	7	pseudo_transcript_0	0.803257	0.0300379	6	6	pseudo_transcript_0	0.340981	-0.0419744	8	8	pseudo_transcript_0	0.036286	0.24483	7	7	pseudo_transcript_0	0.0367104	0.132981	5	5	pseudo_transcript_0	0.9895	0.88836	7	7	pseudo_transcript_0	0.026928	1.10074	5	5	pseudo_transcript_0	0.0534831	1.04109	3	3
SOCS1	P1P2	0.964302	0.0200511	4	4											P1P2	0.130147	0.159806	6	6	P1P2	0.0816298	0.13955	2	2	P1P2	0.125881	0.132837	1	1	P1P2	0.315089	0.441209	3	3
COX7B2	P1P2	0.572997	0.0365523	2	2	P1P2	0.257672	-0.0734383	2	2						P1P2	0.142615	0.135311	2	2	P1P2	0.960394	-0.0566201	7	7	P1P2	0.125881	0.132832	1	1	P1P2	0.847488	-0.0963685	2	2	P1P2	0.948004	0.046366	1	1
CELF4	P1P2	0.345433	0.156581	7	7	P1P2	0.742252	-0.0267681	9	9	P1P2	0.273727	0.0679332	7	7	P1P2	0.0708114	0.0788353	7	7	P1P2	0.37196	0.116796	7	7	P1P2	0.126341	0.132817	5	5	P1P2	0.0422272	2.09828	7	7	P1P2	0.0479574	0.993664	7	7	P1P2	0.0107713	1.46075	5	5
pseudo_11197	pseudo_transcript_0	0.13935	-0.137508	1	1	pseudo_transcript_0	0.638873	-0.0293719	5	5	pseudo_transcript_0	0.114628	-0.119371	1	1	pseudo_transcript_0	0.0476204	0.14732	3	3	pseudo_transcript_0	0.902111	0.00818615	3	3	pseudo_transcript_0	0.126248	0.13275	1	1	pseudo_transcript_0	0.365144	-0.389619	4	4	pseudo_transcript_0	0.91118	0.0522989	2	2	pseudo_transcript_0	0.834526	-0.0684647	1	1
pseudo_12969	pseudo_transcript_0	0.50672	-0.0457304	1	1	pseudo_transcript_0	0.715013	-0.0257769	2	2						pseudo_transcript_0	0.350898	0.0949241	3	3	pseudo_transcript_0	0.445733	-0.0463318	4	4	pseudo_transcript_0	0.126248	0.13275	1	1	pseudo_transcript_0	0.342651	0.489102	2	2	pseudo_transcript_0	0.17126	-1.59791	1	1
pseudo_17432	pseudo_transcript_0	0.26419	-0.0407409	5	5	pseudo_transcript_0	0.170783	0.0541878	3	3	pseudo_transcript_0	0.682905	-0.0131679	1	1	pseudo_transcript_0	0.38858	0.0963288	4	4	pseudo_transcript_0	0.240262	-0.0694055	3	3	pseudo_transcript_0	0.126248	0.13275	1	1	pseudo_transcript_0	0.673009	-0.221964	5	5	pseudo_transcript_0	0.864336	-0.155435	1	1
pseudo_2484	pseudo_transcript_0	0.17133	-0.0997627	2	2	pseudo_transcript_0	0.0443482	-0.10148	3	3	pseudo_transcript_0	0.0409512	-0.107518	2	2	pseudo_transcript_0	0.907917	-0.0640552	5	5	pseudo_transcript_0	0.0112486	0.209377	4	4	pseudo_transcript_0	0.0199919	0.132731	3	3	pseudo_transcript_0	0.697902	-0.162933	3	3	pseudo_transcript_0	0.516591	0.47492	3	3	pseudo_transcript_0	0.469181	0.36478	2	2
pseudo_5689	pseudo_transcript_0	0.130976	0.142894	4	4	pseudo_transcript_0	0.880214	0.00240325	5	5	pseudo_transcript_0	0.533733	0.0348355	2	2	pseudo_transcript_0	0.378539	0.0990028	5	5	pseudo_transcript_0	0.358051	0.0654994	5	5	pseudo_transcript_0	0.0900639	0.132669	4	4	pseudo_transcript_0	0.0736456	1.23511	4	4	pseudo_transcript_0	0.0730311	1.69238	4	4	pseudo_transcript_0	0.710472	0.486977	2	2
pseudo_13258	pseudo_transcript_0	0.634776	0.0397775	3	3	pseudo_transcript_0	0.988174	-0.0110608	4	4	pseudo_transcript_0	0.982597	-0.00492166	2	2	pseudo_transcript_0	0.626453	0.0390207	3	3	pseudo_transcript_0	0.167386	0.0473988	7	7	pseudo_transcript_0	0.0551752	0.132635	2	2	pseudo_transcript_0	0.105118	1.16941	4	4	pseudo_transcript_0	0.00785268	1.33275	4	4	pseudo_transcript_0	0.0468146	1.11547	2	2
pseudo_2885	pseudo_transcript_0	0.973396	0.0197291	5	5	pseudo_transcript_0	0.212463	-0.103053	5	5	pseudo_transcript_0	0.324519	-0.0712707	4	4	pseudo_transcript_0	0.332947	0.122197	7	7	pseudo_transcript_0	0.130996	0.208905	6	6	pseudo_transcript_0	0.0396237	0.132532	6	6	pseudo_transcript_0	0.588895	0.363373	5	5	pseudo_transcript_0	0.631711	-0.110716	5	5	pseudo_transcript_0	0.870533	-0.0610834	4	4
PRDM5	P1P2	0.567284	-0.0249157	9	9	P1P2	0.295644	-0.0674426	4	4	P1P2	0.362352	-0.0279585	4	4	P1P2	0.916581	-0.0588475	8	8	P1P2	0.0284417	0.149407	8	8	P1P2	0.025572	0.132522	7	7	P1P2	0.835372	-0.526149	8	8	P1P2	0.220865	0.710138	3	3	P1P2	0.13931	0.64671	3	3
ABCF1	P1	0.0202801	-0.096691	5	5	P2	0.0116328	-0.120898	5	5	P2	0.353562	-0.029651	2	2	P2	0.291934	0.0513738	5	5	P2	0.0461094	0.23815	7	7	P2	0.073254	0.13246	4	4	P1	0.150714	-1.14141	5	5	P2	0.380823	1.10123	6	6	P2	0.975741	-0.0208144	3	3
FKBP8	P1P2	0.431161	-0.0480051	4	4	P1P2	1	-0.0166826	4	4	P1P2	0.451332	-0.0302049	2	2	P1P2	0.0336187	0.120668	4	4	P1P2	0.511488	0.0329315	4	4	P1P2	0.0745134	0.132387	2	2	P1P2	0.476847	0.118264	5	5	P1P2	0.658456	0.67669	5	5	P1P2	0.464231	0.305109	4	4
pseudo_17796	pseudo_transcript_0	0.0705392	0.111194	5	5	pseudo_transcript_0	0.178974	0.0796104	4	4	pseudo_transcript_1	0.0241012	0.0632001	6	6	pseudo_transcript_0	0.0641037	-0.122756	5	5	pseudo_transcript_0	0.520672	0.09389	6	6	pseudo_transcript_1	0.305628	0.132373	7	7	pseudo_transcript_1	0.198444	0.680555	7	7	pseudo_transcript_0	0.138455	0.920306	3	3	pseudo_transcript_0	0.162276	0.894246	2	2
pseudo_2008	pseudo_transcript_0	0.61436	-0.159302	9	9	pseudo_transcript_0	0.814069	0.0154057	6	6	pseudo_transcript_0	0.575734	-0.0198407	6	6	pseudo_transcript_0	0.11064	0.129192	8	8	pseudo_transcript_0	0.0767476	0.157083	7	7	pseudo_transcript_0	0.0220106	0.13236	7	7	pseudo_transcript_0	0.454714	-0.472649	8	8	pseudo_transcript_0	0.0151802	1.28319	5	5	pseudo_transcript_0	0.0213814	0.913099	5	5
pseudo_13977	pseudo_transcript_0	0.555658	0.0946059	7	7	pseudo_transcript_0	0.418803	-0.0588951	3	3	pseudo_transcript_0	0.578196	-0.0161802	3	3	pseudo_transcript_0	0.668291	0.0274463	6	6	pseudo_transcript_0	0.0126184	0.221006	5	5	pseudo_transcript_0	0.0456074	0.132343	5	5	pseudo_transcript_0	0.9835	0.914568	7	7	pseudo_transcript_0	0.373221	0.44344	4	4	pseudo_transcript_0	0.526935	0.592451	4	4
pseudo_12499	pseudo_transcript_0	0.765423	-0.0289259	5	5	pseudo_transcript_0	0.266422	-0.0937992	5	5	pseudo_transcript_0	0.152912	-0.0509559	3	3	pseudo_transcript_0	0.0631251	0.110116	5	5	pseudo_transcript_0	0.0458848	0.174966	6	6	pseudo_transcript_0	0.00386194	0.132341	4	4	pseudo_transcript_0	0.413462	0.308403	6	6	pseudo_transcript_0	0.467679	0.438452	5	5	pseudo_transcript_0	0.747727	0.127772	3	3
pseudo_17385	pseudo_transcript_0	0.125449	-0.106171	5	5	pseudo_transcript_0	0.446336	-0.160912	6	6	pseudo_transcript_0	0.671504	-0.0148685	3	3	pseudo_transcript_0	0.0826857	0.199074	6	6	pseudo_transcript_0	0.0737915	0.252349	8	8	pseudo_transcript_0	0.0571148	0.132331	5	5	pseudo_transcript_0	0.810371	0.30832	5	5	pseudo_transcript_0	0.285892	1.05383	6	6	pseudo_transcript_0	0.461763	0.437737	4	4
RNLS	P1P2	0.715311	0.0185728	3	3	P1P2	0.268161	-0.0799389	4	4						P1P2	0.294484	-0.0166534	4	4	P1P2	0.303381	0.0265851	5	5	P1P2	0.126616	0.13233	1	1	P1P2	0.614728	0.119837	4	4	P1P2	0.816729	-0.119279	3	3	P1P2	0.578404	0.322443	1	1
pseudo_8697	pseudo_transcript_0	0.29771	0.0595209	3	3	pseudo_transcript_0	0.434666	-0.0542178	3	3	pseudo_transcript_0	0.143869	0.0965394	1	1	pseudo_transcript_0	0.188706	0.124046	7	7	pseudo_transcript_0	0.417586	0.0878328	5	5	pseudo_transcript_0	0.0749585	0.132328	5	5	pseudo_transcript_0	0.525578	0.350358	4	4	pseudo_transcript_0	0.676757	-0.343694	4	4	pseudo_transcript_0	0.569345	-0.203103	2	2
RNF17	P1P2	0.040821	-0.0976885	4	4	P1P2	0.836722	-0.011464	3	3	P1P2	0.534649	0.0403006	1	1	P1P2	0.0969324	0.132372	6	6	P1P2	0.378096	0.0996831	5	5	P1P2	0.0713752	0.132229	4	4	P1P2	0.56428	0.116211	5	5	P1P2	0.794882	0.131413	2	2	P1P2	0.500724	0.394049	1	1
pseudo_14674	pseudo_transcript_0	0.979779	-0.00232761	5	5	pseudo_transcript_0	0.0882306	-0.0842692	5	5	pseudo_transcript_0	0.588258	-0.0106763	3	3	pseudo_transcript_0	0.0337125	0.113124	5	5	pseudo_transcript_0	0.0498209	0.122765	3	3	pseudo_transcript_0	0.126985	0.132132	1	1	pseudo_transcript_0	0.122085	1.01252	5	5	pseudo_transcript_0	0.231837	0.556934	3	3	pseudo_transcript_0	0.21228	0.793834	1	1
pseudo_18295	pseudo_transcript_0	0.837222	0.0248019	7	7	pseudo_transcript_0	0.0491979	-0.0914002	7	7	pseudo_transcript_0	0.404423	-0.0298977	5	5	pseudo_transcript_0	0.872526	-0.0431065	4	4	pseudo_transcript_0	0.834393	0.0555005	5	5	pseudo_transcript_0	0.126985	0.132132	1	1	pseudo_transcript_0	0.819356	-0.420674	5	5	pseudo_transcript_0	0.853232	0.0349356	4	4	pseudo_transcript_0	0.21228	0.793834	1	1
pseudo_373	pseudo_transcript_0	0.621405	-0.0265299	6	6	pseudo_transcript_0	0.331887	-0.0522245	2	2	pseudo_transcript_0	0.258292	-0.0362414	2	2	pseudo_transcript_0	0.890373	0.0234599	5	5	pseudo_transcript_0	0.737806	-0.0236536	3	3	pseudo_transcript_0	0.126985	0.132132	1	1	pseudo_transcript_0	0.800723	-0.0463473	5	5	pseudo_transcript_0	0.779008	-0.555418	6	6	pseudo_transcript_0	0.102767	0.579764	3	3
pseudo_9992	pseudo_transcript_0	0.496636	0.037332	4	4	pseudo_transcript_0	0.596012	-0.0226668	5	5	pseudo_transcript_0	0.621303	-0.0129578	2	2	pseudo_transcript_0	0.724523	-0.0143228	3	3	pseudo_transcript_0	0.920339	0.00898403	4	4	pseudo_transcript_0	0.126985	0.132132	1	1	pseudo_transcript_0	0.962008	-0.179351	5	5	pseudo_transcript_0	0.396772	-0.841345	5	5	pseudo_transcript_0	0.699727	-0.403693	4	4
SEMA3F	P1P2	0.874039	-0.0494212	3	3	P1P2	0.628629	0.0165984	4	4	P1P2	0.825952	-0.0302582	3	3	P1P2	0.476135	-0.0631753	5	5	P1P2	0.148772	0.116186	2	2	P1P2	0.127354	0.132121	1	1	P1P2	0.724129	-0.175154	2	2	P1P2	0.130627	1.49972	1	1
C1orf51	P1P2	0.216732	-0.0455941	5	5	P1P2	0.888233	-0.00215058	4	4	P1P2	0.0313278	-0.0842769	3	3	P1P2	0.294484	0.0490846	4	4	P1P2	0.210764	0.0864964	4	4	P1P2	0.0402143	0.132096	2	2	P1P2	0.399864	-0.37229	3	3	P1P2	0.630649	0.0677291	3	3	P1P2	0.28561	0.432476	2	2
KIAA1841	ENST00000453873.1	0.137262	0.0535514	8	8	ENST00000356719.2	0.145644	0.0868223	2	2	ENST00000453873.1	0.487573	0.0169164	6	6	ENST00000356719.2	0.0446977	-0.119498	6	6	ENST00000402291.1	0.303371	-0.0664856	4	4	ENST00000402291.1	0.127354	0.132056	1	1	ENST00000402291.1	0.394095	-0.511382	3	3	ENST00000356719.2	0.285306	0.781348	3	3	ENST00000402291.1	0.207122	-0.885009	1	1
TMEM184A	P1	0.0921641	0.0803431	3	3	P1	0.0503528	-0.135213	2	2	P1	0.456645	-0.0329781	1	1	P1	0.386126	-0.0847654	2	2	P1	0.0499058	0.194506	4	4	P1	0.127354	0.132026	1	1	P2	0.0491783	0.843007	4	4	P1	0.262006	0.936278	1	1	P1	0.191506	0.845957	1	1
pseudo_16458	pseudo_transcript_0	0.0068826	0.204566	3	3	pseudo_transcript_0	0.347004	-0.0594255	4	4	pseudo_transcript_0	0.298053	0.0462121	2	2	pseudo_transcript_0	0.659693	0.00513891	4	4	pseudo_transcript_0	0.997414	-0.043693	4	4	pseudo_transcript_0	0.0370645	0.132023	2	2	pseudo_transcript_0	0.00733529	2.12337	8	8	pseudo_transcript_0	0.317723	-1.73419	6	6	pseudo_transcript_0	0.844874	0.847998	6	6
ZNF611	P1P2	0.237167	-0.0786028	6	6	P1P2	0.834744	-0.0151701	5	5	P1P2	0.283619	-0.03516	4	4	P1P2	0.437924	0.00821066	6	6	P1P2	0.2203	0.122033	7	7	P1P2	0.0459248	0.131931	6	6	P1P2	0.894105	-0.40153	7	7	P1P2	0.721953	-0.371042	5	5	P1P2	0.797863	0.00690548	4	4
pseudo_8031	pseudo_transcript_0	0.624306	-0.0266191	2	2	pseudo_transcript_0	0.0342916	-0.0991811	6	6	pseudo_transcript_0	0.217543	-0.0543513	2	2	pseudo_transcript_0	0.304878	0.0479589	3	3	pseudo_transcript_0	0.36686	0.108899	4	4	pseudo_transcript_0	0.0334249	0.131892	2	2	pseudo_transcript_0	0.348715	0.615678	5	5	pseudo_transcript_0	0.794171	0.126781	2	2	pseudo_transcript_0	0.390594	0.454323	2	2
pseudo_2562	pseudo_transcript_0	0.737174	-0.0236537	6	6	pseudo_transcript_0	0.392317	0.0343946	3	3	pseudo_transcript_0	0.556911	0.0287868	3	3	pseudo_transcript_0	0.0131634	0.156592	4	4	pseudo_transcript_0	0.362835	0.0827915	5	5	pseudo_transcript_0	0.0458327	0.131826	4	4	pseudo_transcript_0	0.116312	0.687265	3	3	pseudo_transcript_0	0.351791	1.01061	2	2	pseudo_transcript_0	0.0955309	0.942838	2	2
TSHB	P1P2	0.693137	-0.0160528	3	3	P1P2	0.399598	-0.0597365	5	5	P1P2	0.440612	-0.0249868	2	2	P1P2	0.961803	0.00726663	3	3	P1P2	0.00230117	0.243438	6	6	P1P2	0.0762328	0.13174	2	2	P1P2	0.207876	-0.568154	6	6	P1P2	0.072098	0.864603	4	4	P1P2	0.49458	-0.221532	3	3
pseudo_1417	pseudo_transcript_0	0.77997	0.0153471	2	2	pseudo_transcript_0	0.937804	-0.0061076	1	1	pseudo_transcript_0	0.955117	0.00849418	1	1	pseudo_transcript_0	0.714723	0.0160441	4	4	pseudo_transcript_0	0.098274	0.256352	1	1	pseudo_transcript_0	0.127724	0.131733	1	1	pseudo_transcript_0	0.481131	0.342561	2	2
pseudo_13101	pseudo_transcript_0	0.733063	0.0364433	5	5	pseudo_transcript_0	0.0572995	-0.133422	2	2	pseudo_transcript_0	0.131366	-0.108481	1	1	pseudo_transcript_0	0.31378	0.0789241	4	4	pseudo_transcript_0	0.0341021	0.178078	5	5	pseudo_transcript_0	0.0595673	0.131678	2	2	pseudo_transcript_0	0.427606	0.385822	5	5	pseudo_transcript_0	0.190812	0.761429	2	2	pseudo_transcript_0	0.24849	0.710254	1	1
pseudo_15392	pseudo_transcript_0	0.234227	0.101422	1	1	pseudo_transcript_0	0.250809	-0.0689002	3	3						pseudo_transcript_0	0.652129	-0.034186	3	3	pseudo_transcript_0	0.810662	0.026756	3	3	pseudo_transcript_0	0.128467	0.131559	1	1	pseudo_transcript_0	0.506232	-0.46308	1	1	pseudo_transcript_0	0.27613	-1.1334	1	1
pseudo_15428	pseudo_transcript_0	0.290836	-0.0427953	3	3	pseudo_transcript_0	0.611504	-0.0226564	3	3	pseudo_transcript_0	0.557588	-0.0232941	1	1	pseudo_transcript_0	0.285725	0.060151	2	2	pseudo_transcript_0	0.107386	0.0697391	5	5	pseudo_transcript_0	0.128467	0.131559	1	1	pseudo_transcript_0	0.910813	-0.0947413	2	2	pseudo_transcript_0	0.680096	-0.751802	4	4	pseudo_transcript_0	0.101687	-1.50203	1	1
pseudo_8009	pseudo_transcript_0	0.808262	-0.034117	6	6	pseudo_transcript_0	0.417216	-0.162709	6	6	pseudo_transcript_0	0.0737355	-0.111692	4	4	pseudo_transcript_0	0.669185	0.025268	4	4	pseudo_transcript_0	0.44604	-0.0657877	3	3	pseudo_transcript_0	0.128467	0.131559	1	1	pseudo_transcript_0	0.833753	0.0778472	3	3	pseudo_transcript_0	0.109505	-1.29083	2	2
pseudo_6600	pseudo_transcript_0	0.23969	0.0527715	3	3	pseudo_transcript_0	0.416617	0.031449	3	3	pseudo_transcript_0	0.609929	0.0322391	1	1	pseudo_transcript_0	0.169521	0.153558	4	4	pseudo_transcript_0	0.474956	0.0406673	3	3	pseudo_transcript_0	0.0559775	0.131539	2	2	pseudo_transcript_0	0.476194	0.271382	4	4	pseudo_transcript_0	0.496858	0.604456	2	2
pseudo_6247	pseudo_transcript_0	0.0893943	-0.0494446	5	5	pseudo_transcript_0	0.688595	0.0093165	3	3	pseudo_transcript_0	0.0807522	-0.0798898	2	2	pseudo_transcript_0	0.00272094	0.162171	6	6	pseudo_transcript_0	0.951193	0.0793273	6	6	pseudo_transcript_0	0.0581348	0.131522	6	6	pseudo_transcript_0	0.569707	0.678733	5	5	pseudo_transcript_0	0.89762	-0.540221	3	3	pseudo_transcript_0	0.483378	-0.555144	2	2
pseudo_17496	pseudo_transcript_0	0.808517	-0.00279339	5	5	pseudo_transcript_0	0.0611395	-0.124993	6	6	pseudo_transcript_0	0.205446	-0.0459075	4	4	pseudo_transcript_0	0.0854922	0.0643815	5	5	pseudo_transcript_0	0.150214	0.214177	6	6	pseudo_transcript_0	0.0529283	0.131498	5	5	pseudo_transcript_0	0.199342	0.591883	5	5	pseudo_transcript_0	0.567769	0.320872	5	5	pseudo_transcript_0	0.204648	0.508012	4	4
pseudo_12777	pseudo_transcript_0	0.417036	-0.03603	4	4	pseudo_transcript_0	0.742613	0.0300727	5	5	pseudo_transcript_0	0.998551	0.00645869	1	1	pseudo_transcript_0	0.0482473	0.18151	5	5	pseudo_transcript_0	0.443241	0.104756	5	5	pseudo_transcript_0	0.0429769	0.131465	3	3	pseudo_transcript_0	0.111238	1.21299	4	4	pseudo_transcript_0	0.632099	-0.0259305	4	4	pseudo_transcript_0	0.476251	0.336718	2	2
pseudo_15446	pseudo_transcript_0	0.551636	0.0419132	6	6	pseudo_transcript_0	0.340683	-0.0551149	6	6	pseudo_transcript_0	0.762791	-0.00251833	4	4	pseudo_transcript_0	0.883689	0.0099439	5	5	pseudo_transcript_0	0.127501	0.222506	7	7	pseudo_transcript_0	0.0802967	0.131461	5	5	pseudo_transcript_0	0.317696	1.16665	4	4	pseudo_transcript_0	0.0443409	1.27728	4	4	pseudo_transcript_0	0.0247062	1.59243	2	2
pseudo_7512	pseudo_transcript_0	0.334811	0.0887381	5	5	pseudo_transcript_0	0.214813	0.0489492	5	5	pseudo_transcript_0	0.698744	0.0437515	4	4	pseudo_transcript_0	0.474874	0.0822512	7	7	pseudo_transcript_0	0.358967	0.0880324	8	8	pseudo_transcript_0	0.065151	0.13144	5	5	pseudo_transcript_0	0.0660459	1.66138	5	5	pseudo_transcript_0	0.0242675	1.86026	6	6	pseudo_transcript_0	0.0124102	1.46478	5	5
ENO1	P1P2	0.0988559	-0.192727	1	1	P1P2	0.540933	-0.0315533	2	2	P1P2	0.135595	-0.104385	1	1	P1P2	0.15354	0.138791	1	1	P1P2	0.207515	0.0730117	3	3	P1P2	0.12884	0.131297	1	1	P1P2	0.237996	-0.593313	2	2	P1P2	0.22916	1.027	1	1	P1P2	0.779564	0.166321	1	1
EPRS	P1P2	0.732101	-0.0354253	3	3	P1P2	0.721086	-0.017304	3	3						P1P2	0.267352	0.102798	4	4	P1P2	0.228854	0.0895978	4	4	P1P2	0.144043	0.13129	2	2	P1P2	0.361154	-0.389073	3	3	P1P2	0.762283	-0.195191	3	3	P1P2	0.550988	-0.334427	1	1
C20orf203	P1P2	0.357322	0.0624928	4	4	P1P2	0.366256	-0.0892722	2	2	P1P2	0.18505	-0.0841367	1	1	P1P2	0.459827	-0.0511801	5	5	P1P2	0.0478354	0.219884	4	4	P1P2	0.12884	0.131284	1	1	P1P2	0.722531	-0.326435	6	6	P1P2	0.92682	0.0867521	4	4	P1P2	0.707239	-0.105878	4	4
pseudo_16684	pseudo_transcript_0	0.395467	0.00922437	5	5	pseudo_transcript_0	0.297846	-0.113187	9	9	pseudo_transcript_0	0.996768	0.0278421	5	5	pseudo_transcript_0	0.544752	0.0836037	10	10	pseudo_transcript_0	0.255906	0.207795	8	8	pseudo_transcript_0	0.222643	0.131105	8	8	pseudo_transcript_0	0.610871	-0.274725	5	5	pseudo_transcript_0	0.86332	0.396638	7	7	pseudo_transcript_0	0.737081	-0.214956	5	5
PDLIM4	P1P2	0.134565	0.102368	4	4	P1P2	0.263477	-0.0538584	5	5	P1P2	0.644989	0.0236878	3	3	P1P2	0.975646	0.102644	6	6	P1P2	0.0468991	0.177098	5	5	P1P2	0.0344034	0.131059	4	4	P1P2	0.297403	0.295502	4	4	P1P2	0.696152	-0.244393	3	3	P1P2	0.184701	0.872668	1	1
OR4F5	ENST00000335137.3	0.143099	0.0908785	2	2	ENST00000335137.3	0.51258	0.0381487	5	5	ENST00000335137.3	0.305259	0.0492399	2	2	ENST00000335137.3	0.855163	0.0318276	4	4	ENST00000335137.3	0.137225	0.125352	4	4	ENST00000335137.3	0.0346624	0.130986	2	2	ENST00000335137.3	0.730082	-0.447248	4	4	ENST00000335137.3	0.131259	0.925966	2	2	ENST00000335137.3	0.602865	0.336269	2	2
SOCS5	P1P2	0.884172	-0.0194641	6	6	P1P2	0.276477	-0.0362756	5	5	P1P2	0.751295	-0.0214334	2	2	P1P2	0.142928	0.147029	6	6	P1P2	0.106775	0.210879	7	7	P1P2	0.00197633	0.130797	5	5	P1P2	0.754047	1.15038	8	8	P1P2	0.511435	-0.727811	4	4	P1P2	0.474176	-0.378552	4	4
MBNL2	P1P2	0.354097	-0.0792824	5	5	P1P2	0.119691	-0.104066	5	5	P1P2	0.0385251	-0.0921463	4	4	P1P2	0.729944	0.0520099	7	7	P1P2	0.0463801	0.0285514	6	6	P1P2	0.0589395	0.13079	6	6	P1P2	0.528458	-0.42312	5	5	P1P2	0.859944	-1.12384	6	6	P1P2	0.896101	-0.303708	4	4
RPN1	P1P2	0.881305	-0.0118025	1	1	P1P2	0.661719	-0.0199535	3	3	P1P2	0.461049	-0.0323737	1	1	P1P2	0.147542	0.0879371	2	2	P1P2	0.640718	-0.063687	4	4	P1P2	0.12884	0.130767	1	1	P1P2	0.273849	0.823239	1	1	P1P2	0.391008	-0.670334	3	3	P1P2	0.198493	0.83061	1	1
pseudo_3010	pseudo_transcript_0	0.316861	0.0358345	5	5											pseudo_transcript_0	0.170607	0.159851	5	5	pseudo_transcript_0	0.306208	0.0922147	4	4	pseudo_transcript_0	0.010498	0.130752	3	3	pseudo_transcript_0	0.157824	0.850113	4	4	pseudo_transcript_0	0.38576	-0.80605	1	1	pseudo_transcript_0	0.982201	0.0529369	1	1
pseudo_14834	pseudo_transcript_0	0.971837	-0.0367921	6	6	pseudo_transcript_0	0.658644	-0.079083	5	5	pseudo_transcript_0	0.883404	-0.023984	5	5	pseudo_transcript_0	0.0843259	0.105511	5	5	pseudo_transcript_0	0.018372	0.203086	6	6	pseudo_transcript_0	0.0458327	0.130743	4	4	pseudo_transcript_0	0.334043	0.467798	7	7	pseudo_transcript_0	0.127907	0.903795	5	5	pseudo_transcript_0	0.121666	0.905636	4	4
RBM18	P1P2	0.257148	-0.058251	7	7	P1P2	0.654032	-0.0838673	5	5	P1P2	0.084669	-0.120274	5	5	P1P2	0.00223858	0.212023	9	9	P1P2	0.807156	0.0629401	7	7	P1P2	0.0471845	0.130739	7	7	P1P2	0.213337	1.43403	8	8	P1P2	0.864957	-0.146461	6	6	P1P2	0.867761	-0.238228	5	5
SMC2	P1P2	0.153362	-0.0766463	2	2	P1P2	0.614175	-0.0254917	3	3	P1P2	0.676254	-0.0138321	1	1	P1P2	0.369572	0.0631593	2	2	P1P2	0.0115291	0.19381	5	5	P1P2	0.0355701	0.130651	2	2	P1P2	0.0494083	0.900315	4	4	P1P2	0.0498932	1.28651	3	3	P1P2	0.220571	0.771728	1	1
KRBOX4	P1P2	0.313931	-0.0458765	4	4	P1P2	0.987736	-0.0165524	4	4	P1P2	0.295677	-0.0402652	2	2	P1P2	0.462768	0.0505471	5	5	P1P2	0.323141	0.206598	6	6	P1P2	0.0839056	0.130533	5	5	P1P2	0.535014	-0.316645	6	6	P1P2	0.701165	0.174523	3	3	P1P2	1	0.0155601	3	3
HSD17B12	P1P2	0.965065	0.00410615	1	1											P1P2	0.270191	0.0796143	2	2	P1P2	0.300597	0.104461	1	1	P1P2	0.129588	0.130522	1	1	P1P2	0.302786	0.492532	3	3	P1P2	0.321663	-0.621571	2	2	P1P2	0.417213	-0.478477	1	1
pseudo_12250	pseudo_transcript_0	0.19778	0.0358936	7	7	pseudo_transcript_0	0.0683864	-0.116337	3	3	pseudo_transcript_0	0.477774	0.0445583	1	1	pseudo_transcript_0	0.49581	0.0279918	5	5	pseudo_transcript_0	0.0389291	0.189416	2	2	pseudo_transcript_0	0.129963	0.130452	1	1	pseudo_transcript_0	0.598243	0.248631	6	6	pseudo_transcript_0	0.546201	-0.307815	3	3	pseudo_transcript_0	0.441492	-0.296308	2	2
pseudo_15457	pseudo_transcript_0	0.70363	-0.0266591	4	4	pseudo_transcript_0	0.0579127	0.105123	2	2	pseudo_transcript_0	0.56003	-0.0229418	1	1	pseudo_transcript_0	0.819252	0.00407879	4	4	pseudo_transcript_0	0.367835	0.0681935	3	3	pseudo_transcript_0	0.129963	0.130452	1	1	pseudo_transcript_0	0.949981	-0.0554076	4	4	pseudo_transcript_0	0.581153	0.435392	1	1	pseudo_transcript_0	0.656921	0.256191	1	1
pseudo_2277	pseudo_transcript_0	0.701054	-0.0158554	8	8	pseudo_transcript_0	0.070397	0.1033	2	2	pseudo_transcript_0	0.34563	0.042689	2	2	pseudo_transcript_0	0.471563	-0.0383184	3	3	pseudo_transcript_0	0.543556	0.0882121	7	7	pseudo_transcript_0	0.129963	0.130452	1	1	pseudo_transcript_0	0.96188	-0.0607752	4	4	pseudo_transcript_0	0.138474	0.87286	2	2
pseudo_270	pseudo_transcript_0	0.319218	-0.0532285	4	4	pseudo_transcript_0	0.0674736	0.11763	5	5	pseudo_transcript_0	0.960748	0.00864815	3	3	pseudo_transcript_0	0.472318	0.0395269	2	2	pseudo_transcript_0	0.406029	-0.0526302	5	5	pseudo_transcript_0	0.129963	0.130452	1	1	pseudo_transcript_0	0.723073	0.155717	2	2	pseudo_transcript_0	0.0693571	-1.64702	4	4
NR1H4	P1P2	0.294609	-0.0379645	5	5	P1P2	0.133515	-0.0728544	4	4	P1P2	0.126461	-0.0692431	2	2	P1P2	0.505034	0.0370664	5	5	P1P2	0.0295047	0.210672	6	6	P1P2	0.00645959	0.130441	4	4	P1P2	0.373043	-0.335667	5	5	P1P2	0.10356	1.21339	4	4	P1P2	0.601922	0.306756	3	3
MORN4	P1P2	0.77721	-0.0210905	4	4	P1P2	0.346365	-0.043636	3	3						P1P2	0.791488	-0.0297941	5	5	P1P2	0.610596	0.101666	5	5	P1P2	0.0474319	0.13044	2	2	P1P2	0.806577	0.0353726	5	5	P1P2	0.499232	-0.495558	3	3	P1P2	0.287892	0.639202	1	1
pseudo_4466	pseudo_transcript_0	0.65518	-0.0517904	7	7	pseudo_transcript_0	0.841183	0.00476645	3	3	pseudo_transcript_0	0.127618	-0.0422929	3	3	pseudo_transcript_0	0.0360743	0.142885	5	5	pseudo_transcript_0	0.0275594	0.161726	6	6	pseudo_transcript_0	0.0143549	0.13042	4	4	pseudo_transcript_0	0.171587	0.910352	5	5	pseudo_transcript_0	0.121855	0.94548	3	3	pseudo_transcript_0	0.14665	0.629566	3	3
pseudo_969	pseudo_transcript_0	0.993126	0.00209151	3	3	pseudo_transcript_0	0.0114074	-0.1715	5	5	pseudo_transcript_0	0.0925336	-0.0725462	2	2	pseudo_transcript_0	0.576723	0.0292027	5	5	pseudo_transcript_0	0.0014527	0.230182	6	6	pseudo_transcript_0	0.0439373	0.130341	4	4	pseudo_transcript_0	0.227697	0.480833	4	4	pseudo_transcript_0	0.259515	0.766222	5	5	pseudo_transcript_0	0.470516	0.250798	3	3
RALGDS	P2	0.0212717	0.202937	2	2	P1	0.672572	0.0223679	2	2	P2	0.0985006	0.141731	1	1	P1	0.51255	0.0456859	4	4	P2	0.308337	-0.0827967	3	3	P1	0.130339	0.130265	1	1	P2	0.0191597	2.26978	2	2	P1	0.0939996	1.97839	1	1	P1	0.137646	1.13889	1	1
OR7G2	ENST00000305456.2	0.58846	-0.0428724	3	3	ENST00000305456.2	0.969015	-0.0114191	2	2	ENST00000305456.2	0.151487	-0.0976108	1	1	ENST00000305456.2	0.997923	-0.00471929	3	3	ENST00000305456.2	0.192564	0.108479	2	2	ENST00000305456.2	0.130339	0.130255	1	1	ENST00000305456.2	0.0164988	-1.34195	4	4	ENST00000305456.2	0.194827	-1.44852	1	1	ENST00000305456.2	0.113657	-1.32557	1	1
pseudo_7078	pseudo_transcript_0	0.710285	-0.00960607	4	4	pseudo_transcript_0	0.0908594	-0.119144	4	4	pseudo_transcript_0	0.0272258	-0.117073	2	2	pseudo_transcript_0	0.226954	0.0812841	5	5	pseudo_transcript_0	0.0421615	0.174096	5	5	pseudo_transcript_0	0.0386121	0.130225	2	2	pseudo_transcript_0	0.743019	-0.659889	6	6	pseudo_transcript_0	0.443681	0.392397	3	3	pseudo_transcript_0	0.12833	-0.750511	2	2
MORC3	P1P2	0.729632	0.0190628	4	4	P1P2	0.718622	-0.0304152	5	5	P1P2	0.391696	-0.0225975	3	3	P1P2	0.658414	-0.00903758	6	6	P1P2	0.0227608	0.193331	5	5	P1P2	0.00831153	0.130212	4	4	P1P2	0.920568	0.0390619	5	5	P1P2	0.0125383	1.40018	3	3	P1P2	0.071151	0.817853	2	2
pseudo_12910	pseudo_transcript_0	0.984136	0.0413295	6	6	pseudo_transcript_0	0.260874	0.0490695	4	4	pseudo_transcript_0	0.716511	0.0235511	2	2	pseudo_transcript_0	0.516936	0.0707672	6	6	pseudo_transcript_0	0.108655	0.121382	4	4	pseudo_transcript_0	0.0398086	0.130114	2	2	pseudo_transcript_0	0.505426	0.566009	5	5	pseudo_transcript_0	0.0446133	1.15909	3	3	pseudo_transcript_0	0.30573	0.587258	1	1
pseudo_7661	pseudo_transcript_0	0.256875	-0.212562	6	6	pseudo_transcript_0	0.0289716	0.0928137	4	4	pseudo_transcript_0	0.0872749	-0.059874	3	3	pseudo_transcript_0	0.00542939	0.260203	4	4	pseudo_transcript_0	0.872363	-0.011647	4	4	pseudo_transcript_0	0.0402143	0.130044	2	2	pseudo_transcript_0	0.534056	0.332918	4	4	pseudo_transcript_0	0.821175	0.0572445	4	4	pseudo_transcript_0	0.963618	0.107094	3	3
pseudo_14904	pseudo_transcript_0	0.78408	-0.0106647	4	4	pseudo_transcript_0	0.35951	-0.0746318	3	3	pseudo_transcript_0	0.243467	-0.0583776	2	2	pseudo_transcript_0	0.751112	0.0192955	5	5	pseudo_transcript_0	0.00747586	0.209651	3	3	pseudo_transcript_0	0.0123296	0.129983	3	3	pseudo_transcript_0	0.47404	0.275475	4	4	pseudo_transcript_0	0.522902	0.80272	2	2	pseudo_transcript_0	0.635201	0.438845	2	2
TCF15	P1P2	0.974232	-0.105955	7	7	P1P2	0.458284	-0.0834679	8	8	P1P2	0.425061	-0.0687221	6	6	P1P2	0.397079	0.0461916	8	8	P1P2	0.322685	0.249309	8	8	P1P2	0.186413	0.129966	6	6	P1P2	0.669535	-0.793512	7	7	P1P2	0.244779	0.608948	8	8	P1P2	0.181074	0.424988	5	5
pseudo_14691	pseudo_transcript_0	0.494748	-0.0461466	4	4											pseudo_transcript_0	0.172338	0.111391	4	4	pseudo_transcript_0	0.299711	0.0688774	2	2	pseudo_transcript_0	0.130716	0.129954	1	1	pseudo_transcript_0	0.721863	0.243887	4	4	pseudo_transcript_0	0.901683	-0.155501	2	2
pseudo_15411	pseudo_transcript_0	0.0175417	-0.152737	6	6	pseudo_transcript_0	0.81873	0.00921798	2	2	pseudo_transcript_0	0.231517	-0.0707534	1	1	pseudo_transcript_0	0.130221	0.140436	7	7	pseudo_transcript_0	0.782947	-0.0287008	4	4	pseudo_transcript_0	0.130716	0.129954	1	1	pseudo_transcript_0	0.451074	0.424903	6	6
pseudo_15542	pseudo_transcript_0	0.682149	-0.0749423	5	5	pseudo_transcript_0	0.107127	-0.108855	2	2						pseudo_transcript_0	0.275801	0.0907456	4	4	pseudo_transcript_0	0.21725	0.0994477	4	4	pseudo_transcript_0	0.130716	0.129954	1	1	pseudo_transcript_0	0.98486	0.00580386	3	3	pseudo_transcript_0	0.880551	-0.106372	2	2
pseudo_15765	pseudo_transcript_0	0.0233327	-0.173188	2	2	pseudo_transcript_0	0.930442	-0.0155912	4	4	pseudo_transcript_0	0.183251	-0.0845163	1	1	pseudo_transcript_0	0.0709138	0.128663	2	2	pseudo_transcript_0	0.225646	-0.107794	4	4	pseudo_transcript_0	0.130716	0.129954	1	1	pseudo_transcript_0	0.175998	-0.728617	4	4	pseudo_transcript_0	0.0610261	-1.53485	2	2	pseudo_transcript_0	0.0239811	-1.37535	2	2
pseudo_6508	pseudo_transcript_0	0.902324	-0.0390514	5	5	pseudo_transcript_0	0.800748	-0.0203905	3	3	pseudo_transcript_0	0.976456	0.00872697	2	2	pseudo_transcript_0	0.988262	0.0414256	6	6	pseudo_transcript_0	0.195994	0.0919304	3	3	pseudo_transcript_0	0.130716	0.129954	1	1	pseudo_transcript_0	0.734779	0.232262	5	5
IQCG	P1	0.153978	-0.0672315	3	3	P2	0.268116	-0.0474029	5	5	P1	0.400657	-0.0241613	2	2	P1	0.829773	0.0144912	3	3	P2	0.0300736	0.239592	6	6	P2	0.0935689	0.129918	5	5	P1	0.486831	-0.37954	5	5	P2	0.232817	1.02687	6	6	P2	0.0766396	0.868059	4	4
OR12D3	ENST00000396806.3	0.417349	-0.0409383	3	3	ENST00000396806.3	0.0835401	-0.15495	3	3	ENST00000396806.3	0.0851656	-0.0979441	3	3	ENST00000396806.3	0.161128	0.0969871	5	5	ENST00000396806.3	0.139319	0.137409	4	4	ENST00000396806.3	0.0228984	0.129873	4	4	ENST00000396806.3	0.336368	-0.593243	4	4	ENST00000396806.3	0.863126	0.0844419	2	2	ENST00000396806.3	0.725471	-0.170499	2	2
pseudo_3103	pseudo_transcript_0	0.025972	0.145608	6	6	pseudo_transcript_0	0.743993	-0.0141572	3	3	pseudo_transcript_0	0.180798	0.0600447	2	2	pseudo_transcript_0	0.94111	-0.0615503	7	7	pseudo_transcript_0	0.0381978	0.149004	7	7	pseudo_transcript_0	0.141252	0.129841	5	5	pseudo_transcript_0	0.0274463	1.54696	8	8	pseudo_transcript_0	0.040334	1.3578	2	2	pseudo_transcript_0	0.0911312	1.67948	1	1
TRIM60	P1P2	0.680857	0.0187433	8	8	P1P2	0.514539	-0.0178956	6	6	P1P2	0.807947	0.0249105	5	5	P1P2	0.422319	0.0865216	7	7	P1P2	0.51314	0.182476	7	7	P1P2	0.0712517	0.129814	5	5	P1P2	0.9937	0.527897	7	7	P1P2	0.485961	-0.476949	6	6	P1P2	0.524293	0.387438	4	4
TNKS	P1P2	0.443103	-0.0479785	6	6	P1P2	0.425234	-0.13398	6	6	P1P2	0.075209	-0.0793874	4	4	P1P2	0.336358	0.19718	7	7	P1P2	0.374077	0.103563	5	5	P1P2	0.0139474	0.129813	4	4	P1P2	0.941694	0.563587	8	8	P1P2	0.878851	-0.0634456	4	4	P1P2	0.886499	0.0992789	4	4
pseudo_11999	pseudo_transcript_0	0.268985	-0.0814871	6	6	pseudo_transcript_0	0.607977	0.0168686	5	5	pseudo_transcript_0	0.855443	-0.00459568	4	4	pseudo_transcript_0	0.0957541	0.182033	6	6	pseudo_transcript_0	0.0703262	0.155853	6	6	pseudo_transcript_0	0.0827383	0.12975	4	4	pseudo_transcript_0	0.994042	-0.0766502	4	4	pseudo_transcript_0	0.0123636	1.25508	6	6	pseudo_transcript_0	0.122905	0.526765	3	3
pseudo_12643	pseudo_transcript_0	0.0935081	-0.18962	6	6	pseudo_transcript_0	0.0433889	-0.139759	5	5	pseudo_transcript_0	0.0499421	-0.0716381	4	4	pseudo_transcript_0	0.242795	0.206127	7	7	pseudo_transcript_0	0.926163	-0.0271579	7	7	pseudo_transcript_0	0.209778	0.129748	5	5	pseudo_transcript_0	0.784938	-0.334108	5	5	pseudo_transcript_0	0.173177	-1.09732	4	4	pseudo_transcript_0	0.0647778	-0.779849	3	3
CD2AP	P1P2	0.143323	0.0650987	3	3	P1P2	0.0103669	-0.174824	5	5	P1P2	0.334103	-0.0489135	1	1	P1P2	0.102578	0.0910834	3	3	P1P2	0.339267	0.0654938	4	4	P1P2	0.0453629	0.129711	2	2	P1P2	0.437567	0.526797	3	3	P1P2	0.668153	-0.374688	2	2	P1P2	0.143103	1.10241	1	1
pseudo_842	pseudo_transcript_0	0.225968	-0.0682603	5	5	pseudo_transcript_0	0.985509	-0.012498	5	5	pseudo_transcript_0	0.796477	-0.0157106	2	2	pseudo_transcript_0	0.295523	0.0893686	4	4	pseudo_transcript_0	0.045088	0.224845	7	7	pseudo_transcript_0	0.0100425	0.129655	3	3	pseudo_transcript_0	0.614621	-0.400155	5	5	pseudo_transcript_0	0.210543	0.60676	3	3	pseudo_transcript_0	0.596233	0.182626	3	3
TMEM139	P1P2	0.0597238	-0.108294	3	3	P1P2	0.903097	0.00191065	3	3	P1P2	0.104564	-0.135785	1	1	P1P2	0.938589	0.0788825	3	3	P1P2	0.0597376	0.120014	6	6	P1P2	0.106572	0.129514	2	2	P1P2	0.560604	-0.262171	3	3	P1P2	0.0937309	0.909787	4	4	P1P2	0.20057	0.530639	2	2
UFD1L	P1P2	0.333221	-0.0626119	8	8	P1P2	0.0354892	-0.117294	3	3	P1P2	0.183569	-0.0586165	3	3	P1P2	0.0574215	0.0732874	6	6	P1P2	0.17818	-0.0822285	7	7	P1P2	0.0360603	0.129501	5	5	P1P2	0.66352	-0.223338	7	7	P1P2	0.885019	0.0257404	4	4	P1P2	0.344643	-0.518989	3	3
pseudo_17090	pseudo_transcript_0	0.879053	-0.0528304	4	4	pseudo_transcript_0	0.525993	-0.0461283	1	1	pseudo_transcript_0	0.087553	-0.1939	1	1	pseudo_transcript_0	0.0609271	0.197944	4	4	pseudo_transcript_0	0.906759	0.0187362	6	6	pseudo_transcript_0	0.0141672	0.129458	3	3	pseudo_transcript_0	0.535366	0.565042	4	4	pseudo_transcript_0	0.909658	-0.0960686	1	1	pseudo_transcript_0	0.648148	-0.247143	1	1
pseudo_5241	pseudo_transcript_0	0.0587245	0.161267	5	5	pseudo_transcript_0	0.389341	-0.0690514	4	4	pseudo_transcript_0	0.0372952	0.0982472	2	2	pseudo_transcript_0	0.275288	-0.132993	5	5	pseudo_transcript_0	0.0514634	0.175974	3	3	pseudo_transcript_0	0.131472	0.129454	1	1	pseudo_transcript_0	0.582539	0.513938	6	6	pseudo_transcript_0	0.424139	0.45944	4	4	pseudo_transcript_0	0.261022	0.754538	3	3
pseudo_16993	pseudo_transcript_0	0.00248615	-0.212103	5	5	pseudo_transcript_0	0.0313401	0.134266	2	2	pseudo_transcript_0	0.503808	0.0323506	2	2	pseudo_transcript_0	0.219148	0.15865	5	5	pseudo_transcript_0	0.433674	0.0458167	4	4	pseudo_transcript_0	0.092332	0.129446	4	4	pseudo_transcript_0	0.0472592	-1.00405	4	4	pseudo_transcript_0	0.55777	-0.397582	3	3	pseudo_transcript_0	0.541546	-0.337898	1	1
OR5C1	P1P2	0.156921	-0.125711	1	1	P1P2	0.413474	-0.0501316	5	5	P1P2	0.976825	0.00730503	1	1	P1P2	0.0461789	0.110837	3	3	P1P2	0.0656117	0.148011	5	5	P1P2	0.0122406	0.129424	3	3	P1P2	0.939626	0.0517738	1	1	P1P2	0.207815	0.897967	3	3	P1P2	0.131311	1.20558	1	1
WNT1	P1	0.103924	0.139288	5	5	P1	0.357232	0.0568844	4	4	P1	0.151785	0.0640959	2	2	P2	0.0688556	0.120642	3	3	P2	0.193533	0.15083	1	1	P2	0.131852	0.129316	1	1	P2	0.218475	0.598011	3	3	P2	0.334469	0.791739	1	1	P2	0.148724	1.04209	1	1
pseudo_960	pseudo_transcript_0	0.624274	0.0607499	6	6	pseudo_transcript_0	0.79978	-0.0249446	4	4	pseudo_transcript_0	0.359493	0.000502051	4	4	pseudo_transcript_0	0.289638	0.0458745	6	6	pseudo_transcript_0	0.084633	0.204498	6	6	pseudo_transcript_0	0.0869107	0.129259	5	5	pseudo_transcript_0	0.68439	1.32722	7	7	pseudo_transcript_0	0.0900892	1.27629	4	4	pseudo_transcript_0	0.126117	1.13436	4	4
GEMIN2	P1P2	0.0180436	-0.129988	7	7	P1P2	0.419899	-0.0517953	3	3	P1P2	0.0191058	-0.0906793	3	3	P1P2	0.0956076	0.088658	6	6	P1P2	0.270899	0.136691	4	4	P1P2	0.0142685	0.129213	3	3	P1P2	0.9958	0.344969	7	7	P1P2	0.281799	0.77155	5	5	P1P2	0.361691	0.509741	5	5
ZNF683	P1P2	0.0226164	-0.144113	8	8	P1P2	0.155722	-0.0475501	5	5	P1P2	0.0167631	-0.111744	5	5	P1P2	0.039532	0.149551	7	7	P1P2	0.157742	0.147486	6	6	P1P2	0.00671334	0.129107	6	6	P1P2	0.971804	-0.584988	7	7	P1P2	0.982616	0.0965581	6	6	P1P2	0.822965	-0.186718	6	6
pseudo_10554	pseudo_transcript_0	0.293791	-0.0577126	5	5	pseudo_transcript_0	0.961632	-0.00877455	5	5	pseudo_transcript_0	0.706979	-0.0039031	3	3	pseudo_transcript_0	0.0051085	0.163888	6	6	pseudo_transcript_0	0.156809	0.124406	5	5	pseudo_transcript_0	0.0281479	0.129082	4	4	pseudo_transcript_0	0.960099	-0.0144678	3	3	pseudo_transcript_0	0.820162	0.110494	4	4	pseudo_transcript_0	0.421353	0.399704	2	2
pseudo_6833	pseudo_transcript_0	0.103394	-0.0887992	4	4	pseudo_transcript_0	0.0934957	-0.105759	3	3	pseudo_transcript_0	0.0394539	-0.11842	2	2	pseudo_transcript_0	0.0787135	0.111422	2	2	pseudo_transcript_0	0.731541	0.0283864	4	4	pseudo_transcript_0	0.101228	0.128973	2	2	pseudo_transcript_0	0.499246	-0.26807	3	3	pseudo_transcript_0	0.584359	0.242517	3	3	pseudo_transcript_0	0.930329	-0.0355556	2	2
pseudo_5231	pseudo_transcript_0	0.174043	-0.145131	5	5	pseudo_transcript_0	0.254632	0.0618785	6	6	pseudo_transcript_0	0.735768	-0.00541527	2	2	pseudo_transcript_0	0.0676602	0.130514	6	6	pseudo_transcript_0	0.266031	0.0268588	8	8	pseudo_transcript_0	0.0201718	0.128971	5	5	pseudo_transcript_0	0.42166	-0.391064	4	4	pseudo_transcript_0	0.164275	0.457946	6	6	pseudo_transcript_0	0.519869	0.512794	2	2
C7orf73	P1P2	0.919934	-0.0117433	3	3	P1P2	0.248722	-0.064515	3	3	P1P2	0.232246	-0.0443504	2	2	P1P2	0.0612383	0.139355	4	4	P1P2	0.0536378	0.185804	4	4	P1P2	0.0136702	0.128888	3	3	P1P2	0.216204	1.55549	5	5	P1P2	0.0720025	0.992541	3	3	P1P2	0.0584373	1.27402	3	3
pseudo_7648	pseudo_transcript_0	0.228595	-0.132154	2	2	pseudo_transcript_0	0.690618	-0.0108966	4	4	pseudo_transcript_0	0.594753	0.033986	1	1	pseudo_transcript_0	0.705626	0.0663373	6	6	pseudo_transcript_0	0.0147074	0.174158	4	4	pseudo_transcript_0	0.0453629	0.128849	2	2	pseudo_transcript_0	0.0624116	1.42555	2	2	pseudo_transcript_0	0.185552	0.887956	2	2
STUB1	P1P2	0.251898	-0.06937	4	4	P1P2	0.0967884	-0.150138	5	5	P1P2	0.0322304	-0.115011	2	2	P1P2	0.0535372	0.113867	8	8	P1P2	0.0381423	0.220986	5	5	P1P2	0.0155777	0.128842	4	4	P1P2	0.985083	-0.110636	5	5	P1P2	0.574498	-0.470814	2	2	P1P2	0.914395	-0.0350921	2	2
pseudo_15277	pseudo_transcript_0	0.67389	-0.0105353	6	6	pseudo_transcript_0	0.868608	-0.0591482	7	7	pseudo_transcript_0	0.588258	0.0261314	3	3	pseudo_transcript_0	0.100697	0.0822013	5	5	pseudo_transcript_0	0.588153	0.0840478	5	5	pseudo_transcript_0	0.0946457	0.128835	4	4	pseudo_transcript_0	0.878522	-0.190178	4	4	pseudo_transcript_0	0.194024	0.23317	5	5	pseudo_transcript_0	0.671156	-0.103918	3	3
PISD	ENST00000266095.5	0.698027	0.0646138	7	7	ENST00000266095.5	0.108365	-0.0843232	3	3	ENST00000266095.5	0.380221	-0.0229492	3	3	ENST00000382151.2	0.0122916	0.187396	6	6	ENST00000266095.5	0.721463	0.0330912	4	4	ENST00000382151.2	0.0213514	0.128796	3	3	ENST00000382151.2	0.0522162	0.970549	3	3	ENST00000266095.5	0.0821837	-0.986091	3	3	ENST00000266095.5	0.0976925	-0.711206	3	3
pseudo_9692	pseudo_transcript_0	0.0483104	-0.112084	6	6	pseudo_transcript_1	0.105468	-0.0633364	5	5	pseudo_transcript_0	0.172441	-0.0649627	3	3	pseudo_transcript_1	0.0239723	-0.158264	4	4	pseudo_transcript_0	0.133032	0.208942	6	6	pseudo_transcript_0	0.0238928	0.12876	4	4	pseudo_transcript_1	0.474347	-0.368345	4	4	pseudo_transcript_0	0.0565685	0.946295	4	4	pseudo_transcript_0	0.187774	0.600479	2	2
IER5	P1P2	0.423632	-0.0897413	4	4	P1P2	0.324761	0.0679963	1	1						P1P2	0.157407	0.116025	3	3	P1P2	0.681249	-0.0262164	2	2	P1P2	0.131852	0.12873	1	1	P1P2	0.806112	-0.0877326	4	4	P1P2	0.397896	0.467838	2	2	P1P2	0.614975	-0.281398	1	1
pseudo_4499	pseudo_transcript_0	0.411989	0.0947601	5	5	pseudo_transcript_0	0.0499697	0.103075	8	8	pseudo_transcript_0	0.240373	0.0838899	5	5	pseudo_transcript_0	0.437436	0.0235536	7	7	pseudo_transcript_0	0.397153	0.0124401	6	6	pseudo_transcript_0	0.220691	0.128716	6	6	pseudo_transcript_0	0.346957	0.245104	6	6	pseudo_transcript_0	0.118011	0.283403	5	5	pseudo_transcript_0	0.0140945	0.904404	4	4
MLLT4	P1P2	0.162377	-0.170533	5	5	P1P2	0.358845	-0.0584627	3	3	P1P2	0.0240066	-0.129664	2	2	P1P2	0.394245	0.21362	8	8	P1P2	0.395246	0.0963382	7	7	P1P2	0.0530094	0.128707	5	5	P1P2	0.859713	-0.297755	4	4	P1P2	0.385217	-0.560434	3	3	P1P2	0.966845	0.0183243	2	2
RND3	P1P2	0.347027	-0.0810521	4	4	P1P2	0.135804	-0.086447	4	4	P1P2	0.0913195	-0.171322	1	1	P1P2	0.236425	0.155582	6	6	P1P2	0.290091	0.0503967	6	6	P1P2	0.0577223	0.128694	5	5	P1P2	0.577456	-0.0245552	4	4	P1P2	0.468688	0.402416	2	2	P1P2	0.614975	-0.276356	1	1
TSPAN14	P1P2	0.136309	-0.0852386	2	2	P1P2	0.421358	-0.0577593	2	2	P1P2	0.3145	-0.0524582	1	1	P1P2	0.162215	0.0789289	5	5	P1P2	0.123733	0.197443	1	1	P1P2	0.131852	0.128603	1	1	P1P2	0.832068	-0.105302	2	2	P1P2	0.30312	-0.678015	2	2
LOC643669	P1P2	0.888081	0.00719164	4	4											P1P2	0.0869683	0.100055	5	5	P1P2	0.164678	0.106111	2	2	P1P2	0.131852	0.128585	1	1	P1P2	0.125969	0.756743	3	3	P1P2	0.417208	0.497411	2	2	P1P2	0.114586	1.31647	1	1
pseudo_12132	pseudo_transcript_0	0.884387	6.29404e-06	8	8	pseudo_transcript_0	0.14185	-0.129572	7	7	pseudo_transcript_0	0.205434	-0.0234145	7	7	pseudo_transcript_0	0.0878639	0.177832	5	5	pseudo_transcript_0	0.594444	-0.124766	5	5	pseudo_transcript_0	0.0382202	0.128458	2	2	pseudo_transcript_0	0.0411212	1.52434	6	6	pseudo_transcript_0	0.139753	-1.05259	4	4	pseudo_transcript_0	0.514306	-0.231822	2	2
TECRL	P1P2	0.595163	0.0309785	5	5	P1P2	0.781139	0.00492091	5	5	P1P2	1	0.00572298	3	3	P1P2	0.718713	0.0785379	7	7	P1P2	0.68586	0.0970424	5	5	P1P2	0.28479	0.128439	5	5	P1P2	0.410692	0.56859	5	5	P1P2	0.179638	0.967724	4	4	P1P2	0.197435	0.510319	3	3
MAP2K5	P1P2	0.0080327	-0.151223	6	6	P1P2	0.867455	-0.00127841	4	4	P1P2	0.0326688	-0.0803643	3	3	P1P2	0.00688668	0.160367	6	6	P1P2	0.274464	0.0732618	7	7	P1P2	0.0710445	0.128407	5	5	P1P2	0.909588	-0.0411765	7	7	P1P2	0.489252	0.293469	3	3	P1P2	0.762839	0.0821801	3	3
pseudo_4135	pseudo_transcript_0	0.978984	0.00403244	8	8	pseudo_transcript_0	0.116646	-0.100648	4	4	pseudo_transcript_0	0.149926	-0.0470216	3	3	pseudo_transcript_0	0.115764	0.104359	7	7	pseudo_transcript_0	0.718553	-0.0396066	8	8	pseudo_transcript_0	0.42036	0.128402	6	6	pseudo_transcript_0	0.296386	0.47928	7	7	pseudo_transcript_0	0.58591	-0.409357	3	3	pseudo_transcript_0	0.987421	-0.020234	2	2
NUMA1	ENST00000393695.3	0.114237	-0.0537974	5	5	ENST00000393695.3	0.364595	-0.108337	5	5	ENST00000393695.3	0.0272258	-0.124957	2	2	ENST00000393695.3	0.0614257	0.134834	4	4	ENST00000393695.3	0.605077	0.0205114	3	3	ENST00000393695.3	0.131852	0.128265	1	1	ENST00000393695.3	0.702824	-0.285922	5	5	ENST00000393695.3	0.100227	-1.23948	2	2	ENST00000393695.3	0.291588	-0.66715	1	1
pseudo_15665	pseudo_transcript_0	0.704193	0.0174821	3	3	pseudo_transcript_0	0.391408	0.0614826	5	5	pseudo_transcript_0	0.720349	0.0191098	2	2	pseudo_transcript_0	0.0579747	0.118045	3	3	pseudo_transcript_0	0.40801	-0.122329	8	8	pseudo_transcript_0	0.0329062	0.128209	2	2	pseudo_transcript_0	0.35677	0.506739	4	4	pseudo_transcript_0	0.793931	0.0847114	4	4	pseudo_transcript_0	0.25932	0.616384	2	2
pseudo_9125	pseudo_transcript_0	0.965095	0.016453	4	4	pseudo_transcript_0	0.758932	-0.0664939	4	4	pseudo_transcript_0	0.253994	-0.0665586	2	2	pseudo_transcript_0	0.76492	-0.0464392	6	6	pseudo_transcript_0	0.142568	0.131958	4	4	pseudo_transcript_0	0.0329062	0.128209	2	2	pseudo_transcript_0	0.819244	0.169663	4	4	pseudo_transcript_0	0.930444	-0.173839	4	4	pseudo_transcript_0	0.138184	1.13806	1	1
HSF2	P1P2	0.119082	-0.0878509	2	2	P1P2	0.07162	-0.126026	3	3	P1P2	0.0322304	-0.134161	2	2	P1P2	0.540819	-0.0381974	2	2	P1P2	0.0174338	0.294305	2	2	P1P2	0.0329062	0.128054	2	2	P1P2	0.11752	-0.875274	3	3	P1P2	0.718682	-0.754699	4	4	P1P2	0.810827	-0.137784	2	2
KRT4	P1	0.350419	-0.0462896	2	2	P2	0.0219043	-0.18527	4	4	P2	0.108211	-0.0855908	3	3	P2	0.214983	0.0623205	3	3	P2	0.098056	0.135792	5	5	P1	0.131852	0.128019	1	1	P1	0.404767	-0.601214	1	1	P1	0.545062	0.475659	1	1	P2	0.729193	-0.288581	3	3
SLC35B3	P1P2	0.772259	-0.072031	4	4	P1P2	0.415931	-0.135814	6	6	P1P2	0.762979	-0.0596139	3	3	P1P2	0.048293	0.158538	5	5	P1P2	0.388471	-0.0579615	8	8	P1P2	0.0933104	0.128006	5	5	P1P2	0.460457	0.287061	5	5	P1P2	0.45396	-0.692332	6	6	P1P2	0.478465	-0.327507	3	3
UTP18	P1P2	0.4757	0.0501032	5	5	P1P2	0.298037	-0.0940239	5	5	P1P2	0.301855	-0.0528178	3	3	P1P2	0.587525	0.029984	3	3	P1P2	0.0599976	0.224111	5	5	P1P2	0.049337	0.127958	2	2	P1P2	0.102692	0.981546	7	7	P1P2	0.448708	-0.498984	4	4	P1P2	0.95523	0.0600398	3	3
SEC23B	P1P2	0.0651191	-0.0899725	4	4	P1P2	0.335773	0.0454584	2	2						P1P2	0.020554	0.131493	6	6	P1P2	0.0702812	0.0979302	7	7	P1P2	0.0162534	0.127951	5	5	P1P2	0.748741	0.113594	3	3	P1P2	0.568232	0.361754	2	2
KDM5C	P1P2	0.072388	-0.0813416	3	3	P1P2	0.642801	0.0293123	1	1						P1P2	0.143813	0.105905	3	3	P1P2	0.743461	0.0277592	3	3	P1P2	0.131852	0.127816	1	1	P1P2	0.743179	-0.486143	5	5	P1P2	0.316503	0.832229	1	1	P1P2	0.526873	-0.347876	1	1
MAP2	P1	0.200189	0.0698638	4	4	P1	0.0642626	-0.113411	3	3	P2	0.236512	0.0752846	1	1	P1	0.238921	-0.115734	4	4	P2	0.0231846	-0.130903	6	6	P1	0.046044	0.127805	2	2	P2	0.521013	-0.364634	2	2	P2	0.289749	-0.369276	6	6	P2	0.331878	-0.46432	2	2
LHFPL1	P1P2	0.806006	0.0174447	2	2	P1P2	0.875301	-0.00832429	2	2						P1P2	0.551494	0.0355918	3	3	P1P2	0.247076	0.121342	1	1	P1P2	0.131852	0.127756	1	1	P1P2	0.104798	-0.836547	4	4
SRMS	P1P2	0.971513	-0.0407916	6	6	P1P2	0.693048	0.0120003	4	4	P1P2	0.20816	0.0494141	3	3	P1P2	0.653738	-0.0534013	8	8	P1P2	0.089016	0.217393	6	6	P1P2	0.0992677	0.127605	6	6	P1P2	0.554992	0.038131	5	5	P1P2	0.38238	0.408153	4	4	P1P2	0.582519	0.375963	3	3
FDXR	P1P2	0.8659	0.00739175	3	3	P1P2	0.958406	-0.0423366	4	4	P1P2	0.38947	0.0540873	1	1	P1P2	0.273228	0.0722787	4	4	P1P2	0.140099	0.30803	7	7	P1P2	0.083792	0.127568	4	4	P1P2	0.790158	-0.113485	6	6	P1P2	0.0345346	1.49061	4	4	P1P2	0.649607	0.265504	1	1
ENPP7	P1P2	0.33198	0.0541133	3	3	P1P2	0.364109	-0.151449	7	7	P1P2	0.689854	0.0278835	2	2	P1P2	0.306369	0.0829294	6	6	P1P2	0.174038	0.114406	4	4	P1P2	0.131852	0.127485	1	1	P1P2	0.255492	0.484715	4	4	P1P2	0.200549	0.634348	4	4	P1P2	0.903145	-0.0219321	1	1
DBR1	P1P2	0.0132252	-0.229743	5	5	P1P2	0.120181	-0.17604	1	1	P1P2	0.326885	-0.0500222	1	1	P1P2	0.011123	0.251655	4	4	P1P2	0.0269828	0.15811	3	3	P1P2	0.131852	0.127429	1	1	P1P2	0.779013	-0.50689	8	8	P1P2	0.24309	-0.926141	4	4	P1P2	0.379024	-0.286738	4	4
pseudo_17525	pseudo_transcript_0	0.318152	0.095207	5	5	pseudo_transcript_0	0.47055	-0.0467986	5	5	pseudo_transcript_0	0.487574	-0.0197751	2	2	pseudo_transcript_0	0.122455	0.164131	7	7	pseudo_transcript_0	0.457137	0.112002	6	6	pseudo_transcript_0	0.130494	0.127395	5	5	pseudo_transcript_0	0.155638	0.972307	4	4	pseudo_transcript_0	0.523659	0.351221	4	4	pseudo_transcript_0	0.199564	0.514843	2	2
KIAA0907	P1P2	0.834458	-0.0177717	6	6	P1P2	0.461184	0.0233083	6	6	P1P2	0.871266	-0.0119594	5	5	P1P2	0.899224	0.00825647	7	7	P1P2	0.167196	0.108582	9	9	P1P2	0.346025	0.127389	7	7	P1P2	0.770801	0.00399591	9	9	P1P2	0.113249	0.751048	6	6	P1P2	0.454971	0.521539	6	6
ZNF474	P1P2	0.092506	0.158498	4	4	P1P2	0.654503	-0.0579608	6	6	P1P2	0.266873	0.0536422	4	4	P1P2	0.815446	0.0164062	2	2	P1P2	0.167247	0.183429	4	4	P1P2	0.0451378	0.12727	2	2	P1P2	0.299024	0.690696	3	3	P1P2	0.38309	0.473497	4	4	P1P2	0.0432737	0.95007	3	3
pseudo_5616	pseudo_transcript_0	0.24818	-0.0968394	5	5	pseudo_transcript_0	0.413474	-0.0808555	5	5	pseudo_transcript_0	0.0702952	-0.101774	4	4	pseudo_transcript_0	0.494535	0.0534862	5	5	pseudo_transcript_0	0.13612	0.110723	2	2	pseudo_transcript_0	0.0386121	0.127249	2	2	pseudo_transcript_0	0.193245	-0.601722	7	7	pseudo_transcript_0	0.599887	0.332711	2	2	pseudo_transcript_0	0.755782	0.169408	2	2
OR5K1	ENST00000332650.5	0.6068	0.0241684	3	3	ENST00000332650.5	0.0626879	-0.127638	2	2						ENST00000332650.5	0.19223	0.0862063	3	3	ENST00000332650.5	0.874186	0.0185366	4	4	ENST00000332650.5	0.131852	0.127228	1	1	ENST00000332650.5	0.837345	0.221914	3	3	ENST00000332650.5	0.248031	-0.840022	2	2	ENST00000332650.5	0.308612	0.584708	1	1
NSUN5	P1P2	0.883839	-0.041856	7	7	P1P2	0.541185	0.0434127	6	6	P1P2	0.416214	-0.0218928	4	4	P1P2	0.00656723	0.142947	7	7	P1P2	0.789372	-0.123803	6	6	P1P2	0.207146	0.127224	5	5	P1P2	0.0771769	1.41471	7	7	P1P2	0.368218	-0.700323	5	5	P1P2	0.876914	-0.253269	4	4
PRAMEF20	ENST00000602960.1	0.667459	0.0185943	3	3	ENST00000316412.5	0.0910693	-0.165698	4	4	ENST00000316412.5	0.110728	-0.0623638	2	2	ENST00000316412.5	0.481557	0.0366853	3	3	ENST00000316412.5	0.00399085	0.22846	4	4	ENST00000316412.5	0.138382	0.127208	2	2	ENST00000602960.1	0.653023	-0.17845	4	4	ENST00000602960.1	0.0195122	1.25169	3	3	ENST00000602960.1	0.169279	0.564425	2	2
pseudo_11627	pseudo_transcript_0	0.0414955	0.142883	2	2	pseudo_transcript_0	0.0983305	-0.0744268	4	4	pseudo_transcript_0	0.484361	0.0332042	2	2	pseudo_transcript_0	0.130606	0.0732009	5	5	pseudo_transcript_0	0.125284	0.185028	4	4	pseudo_transcript_0	0.0474319	0.127148	2	2	pseudo_transcript_0	0.145231	0.952248	3	3	pseudo_transcript_0	0.346619	0.485803	5	5	pseudo_transcript_0	0.0258294	1.446	2	2
REST	P1	0.204752	-0.124837	6	6	P2	0.151585	-0.0832569	4	4	P2	0.141775	-0.0624223	4	4	P1	0.443155	0.0756989	6	6	P1	0.00285159	0.262567	5	5	P1	0.0296675	0.127142	4	4	P1	0.30736	-0.567225	5	5	P2	0.130895	-0.88072	4	4	P2	0.657848	-0.204597	2	2
pseudo_6354	pseudo_transcript_0	0.2714	-0.0566982	2	2	pseudo_transcript_0	0.693672	0.0187693	2	2	pseudo_transcript_0	0.327782	-0.0496368	1	1	pseudo_transcript_0	0.00721783	0.194003	3	3	pseudo_transcript_0	0.525917	-0.0274611	5	5	pseudo_transcript_0	0.0101923	0.127112	3	3	pseudo_transcript_0	0.275795	0.585135	4	4	pseudo_transcript_0	0.366769	0.505119	2	2	pseudo_transcript_0	0.45913	0.416062	1	1
KANSL3	P1P2	0.243151	-0.0626222	3	3	P1P2	0.836227	-0.0281377	3	3	P1P2	0.139021	-0.0551063	2	2	P1P2	0.0847506	0.110319	2	2	P1P2	0.0653608	0.116357	3	3	P1P2	0.0341273	0.127092	2	2	P1P2	0.447131	0.3833	3	3	P1P2	0.384653	0.617735	2	2	P1P2	0.167507	0.573165	2	2
pseudo_1483	pseudo_transcript_0	0.83611	0.0108653	4	4	pseudo_transcript_0	0.219003	-0.0592365	4	4	pseudo_transcript_0	0.350905	-0.0305991	2	2	pseudo_transcript_0	0.230228	0.0785521	4	4	pseudo_transcript_0	0.0805502	0.175243	5	5	pseudo_transcript_0	0.00979709	0.126898	3	3	pseudo_transcript_0	0.403415	0.354681	3	3	pseudo_transcript_0	0.621478	0.388858	4	4	pseudo_transcript_0	0.0821084	0.799866	2	2
pseudo_1601	pseudo_transcript_1	0.714957	0.0358672	2	2	pseudo_transcript_0	0.483017	0.0386798	5	5	pseudo_transcript_1	0.509863	0.0425214	1	1	pseudo_transcript_0	0.0965127	0.175109	7	7	pseudo_transcript_0	0.088898	0.155142	8	8	pseudo_transcript_0	0.00656664	0.126869	7	7	pseudo_transcript_0	0.6453	0.416414	6	6	pseudo_transcript_0	0.00400626	1.71666	5	5	pseudo_transcript_0	0.00790957	1.22882	5	5
pseudo_15441	pseudo_transcript_0	0.397944	-0.079848	5	5	pseudo_transcript_0	0.165499	-0.114559	3	3	pseudo_transcript_0	0.0842386	-0.278747	1	1	pseudo_transcript_0	0.869332	-0.0189905	4	4	pseudo_transcript_0	0.115769	0.175949	4	4	pseudo_transcript_0	0.0932059	0.126824	2	2	pseudo_transcript_0	0.0283333	-1.10938	3	3	pseudo_transcript_0	0.7686	-0.157403	3	3	pseudo_transcript_0	0.112591	-0.733789	2	2
pseudo_17078	pseudo_transcript_0	0.296575	-0.0949749	4	4	pseudo_transcript_0	0.681737	-0.032005	4	4	pseudo_transcript_0	0.433045	-0.0247112	2	2	pseudo_transcript_0	0.348298	0.184325	7	7	pseudo_transcript_0	0.720755	0.0157655	8	8	pseudo_transcript_0	0.203884	0.126765	6	6	pseudo_transcript_0	0.990864	-0.139615	4	4	pseudo_transcript_0	0.361109	0.525088	4	4	pseudo_transcript_0	0.429678	0.458295	2	2
pseudo_8527	pseudo_transcript_0	0.646951	-0.0295452	4	4	pseudo_transcript_0	0.903538	0.00202208	2	2	pseudo_transcript_0	0.352232	-0.0279844	2	2	pseudo_transcript_0	0.173332	-0.0591859	4	4	pseudo_transcript_0	0.496707	0.0725138	3	3	pseudo_transcript_0	0.132232	0.126746	1	1	pseudo_transcript_0	0.164824	-0.884613	4	4
KIAA1984	P1P2	0.201415	-0.0598004	4	4	P1P2	0.0526803	-0.195223	2	2	P1P2	0.0394539	-0.154022	2	2	P1P2	0.218709	0.0672588	4	4	P1P2	0.532513	0.050866	6	6	P1P2	0.0449136	0.126703	2	2	P1P2	0.92187	0.0187319	4	4	P1P2	0.524102	-0.523445	2	2	P1P2	0.341974	-0.424801	2	2
NAMPT	P1P2	0.767041	-0.0174983	2	2	P1P2	0.634946	-0.0331444	1	1	P1P2	0.255728	-0.0643551	1	1	P1P2	0.570758	0.0974115	2	2	P1P2	0.70661	-0.0266484	4	4	P1P2	0.132613	0.126674	1	1	P1P2	0.694585	0.24011	5	5	P1P2	0.583837	-0.46365	1	1	P1P2	0.465305	0.413073	1	1
pseudo_15172	pseudo_transcript_0	0.335674	-0.051437	4	4	pseudo_transcript_0	0.0504356	-0.154237	3	3	pseudo_transcript_0	0.310267	-0.0957267	3	3	pseudo_transcript_0	0.0518772	0.120075	5	5	pseudo_transcript_0	0.480149	0.146041	4	4	pseudo_transcript_0	0.0436854	0.126638	3	3	pseudo_transcript_0	0.661124	0.606476	6	6	pseudo_transcript_0	0.918543	-0.102909	4	4	pseudo_transcript_0	0.819591	0.0677405	3	3
SCN1A	ENST00000303395.4,ENST00000423058.2	0.0807894	-0.0968031	3	3	ENST00000303395.4,ENST00000423058.2	0.812356	0.015486	1	1	ENST00000303395.4,ENST00000423058.2	0.927669	0.000957969	1	1	ENST00000303395.4,ENST00000423058.2	0.0422403	0.152156	2	2	ENST00000303395.4,ENST00000423058.2	0.876336	-0.000770259	3	3	ENST00000303395.4,ENST00000423058.2	0.132613	0.126616	1	1	ENST00000303395.4,ENST00000423058.2	0.990467	-0.00152604	4	4	ENST00000303395.4,ENST00000423058.2	0.238379	-1.25974	1	1
ARHGAP35	ENST00000404338.3	0.874199	-0.0164612	2	2	ENST00000404338.3	0.300725	-0.0537028	3	3	ENST00000404338.3	0.23081	0.0759772	1	1	ENST00000404338.3	0.784226	-0.00935914	3	3	ENST00000404338.3	0.0473164	0.183714	4	4	ENST00000404338.3	0.132613	0.126575	1	1	ENST00000404338.3	0.0519351	-1.13016	2	2	ENST00000404338.3	0.607602	0.288143	2	2
C20orf27	P1P2	0.564727	0.042357	5	5	P1P2	0.721086	-0.0307026	3	3	P1P2	0.97441	0.00883348	2	2	P1P2	0.611753	0.0359969	6	6	P1P2	0.0749741	0.181928	5	5	P1P2	0.0453932	0.126527	5	5	P1P2	0.0640775	0.858167	3	3	P1P2	0.0243175	1.26878	3	3	P1P2	0.035749	1.16598	2	2
NEURL1B	P1P2	0.0271388	0.133431	5	5	P1P2	0.155122	-0.186192	7	7	P1P2	0.806436	0.0144474	3	3	P1P2	0.725342	-0.0426261	7	7	P1P2	0.0615761	0.218954	8	8	P1P2	0.120541	0.126491	5	5	P1P2	0.00212857	1.4661	5	5	P1P2	0.794268	-0.13611	8	8	P1P2	0.0151791	1.07781	3	3
KLHL3	P1P2	0.176464	-0.143853	6	6	P1P2	0.56025	-0.150827	9	9	P1P2	0.0720569	-0.0620582	5	5	P1P2	0.123811	0.231016	8	8	P1P2	0.661369	0.0563368	9	9	P1P2	0.120324	0.12647	7	7	P1P2	0.716427	0.342204	7	7	P1P2	0.850434	0.327485	8	8	P1P2	0.925672	0.363877	6	6
SAV1	P1P2	0.208162	-0.0933273	4	4	P1P2	0.449387	-0.0385257	5	5	P1P2	0.177153	-0.0659265	4	4	P1P2	0.282264	0.0919274	5	5	P1P2	0.0783344	0.0963951	8	8	P1P2	0.06075	0.126421	5	5	P1P2	0.167059	0.742124	6	6	P1P2	0.200295	0.863744	5	5	P1P2	0.215697	0.494226	4	4
OR52B4	ENST00000408920.2	0.21084	-0.102537	1	1											ENST00000408920.2	0.470282	0.0377296	3	3	ENST00000408920.2	0.229816	0.0853233	2	2	ENST00000408920.2	0.132613	0.1264	1	1	ENST00000408920.2	0.835998	0.078791	3	3	ENST00000408920.2	0.571361	-0.474873	1	1	ENST00000408920.2	0.614975	-0.279459	1	1
LPPR4	P1P2	0.832721	0.0249825	5	5	P1P2	0.196538	-0.0724632	6	6	P1P2	0.0981371	-0.0693636	2	2	P1P2	0.101546	0.159458	4	4	P1P2	0.104072	0.17944	6	6	P1P2	0.132613	0.126395	1	1	P1P2	0.811382	-0.104591	3	3	P1P2	0.671049	0.386959	4	4	P1P2	0.948574	-0.0873354	2	2
pseudo_8559	pseudo_transcript_0	0.735246	-0.0392737	4	4	pseudo_transcript_0	0.463036	-0.0362485	5	5	pseudo_transcript_0	0.327196	-0.0377611	4	4	pseudo_transcript_0	0.42543	0.102331	6	6	pseudo_transcript_0	0.131382	0.112777	6	6	pseudo_transcript_0	0.0679589	0.126331	4	4	pseudo_transcript_0	0.769241	-0.319145	5	5	pseudo_transcript_0	0.0924582	1.24569	5	5	pseudo_transcript_0	0.11829	0.854114	4	4
ALDH9A1	P1P2	0.980251	0.115531	6	6	P1P2	0.622218	0.0128346	3	3	P1P2	0.529825	-0.0239417	3	3	P1P2	0.833318	-0.0151364	2	2	P1P2	0.588472	0.0707477	6	6	P1P2	0.132613	0.126329	1	1	P1P2	0.68335	-0.209754	2	2	P1P2	0.582809	0.527349	3	3	P1P2	0.11	1.35848	1	1
SLC39A1	P1P2	0.786374	-0.0285741	4	4	P1P2	0.166468	-0.0627799	3	3	P1P2	0.549081	-0.0237381	1	1	P1P2	0.559172	-0.044453	3	3	P1P2	0.00702167	0.204598	6	6	P1P2	0.0346624	0.126233	2	2	P1P2	0.504974	-0.403882	6	6	P1P2	0.131495	0.88912	2	2	P1P2	0.165361	0.941067	1	1
pseudo_10456	pseudo_transcript_0	0.0708505	-0.0829549	3	3	pseudo_transcript_0	0.975912	-0.0203145	4	4	pseudo_transcript_0	0.338666	-0.0484133	1	1	pseudo_transcript_0	0.108526	0.18819	1	1	pseudo_transcript_0	0.795771	-0.0160695	3	3	pseudo_transcript_0	0.132995	0.12598	1	1	pseudo_transcript_0	0.188683	-1.05265	1	1	pseudo_transcript_0	0.20166	1.01966	2	2
pseudo_13773	pseudo_transcript_0	0.586878	0.0265797	3	3	pseudo_transcript_0	0.040665	0.098256	3	3	pseudo_transcript_0	0.468813	0.0460313	1	1	pseudo_transcript_0	0.763018	0.0391501	4	4	pseudo_transcript_0	0.4502	0.0472153	3	3	pseudo_transcript_0	0.132995	0.12598	1	1	pseudo_transcript_0	0.336869	0.581927	4	4	pseudo_transcript_0	0.056586	1.40136	2	2
pseudo_17306	pseudo_transcript_0	0.229771	-0.0439653	4	4	pseudo_transcript_0	0.350235	0.0394937	5	5	pseudo_transcript_0	0.138957	-0.102169	1	1	pseudo_transcript_0	0.348484	0.0652506	3	3	pseudo_transcript_0	0.984476	-0.0142825	5	5	pseudo_transcript_0	0.132995	0.12598	1	1	pseudo_transcript_0	0.595293	0.248478	2	2	pseudo_transcript_0	0.681528	0.31602	4	4	pseudo_transcript_0	0.759412	-0.135339	1	1
pseudo_18047	pseudo_transcript_0	0.797372	-0.00961346	3	3	pseudo_transcript_0	0.773613	-0.0316476	5	5	pseudo_transcript_0	0.130328	-0.0575965	2	2	pseudo_transcript_0	0.137287	0.100469	4	4	pseudo_transcript_0	0.67792	-0.0431691	4	4	pseudo_transcript_0	0.132995	0.12598	1	1	pseudo_transcript_0	0.176794	0.519978	4	4	pseudo_transcript_0	0.839277	0.150991	2	2
pseudo_18515	pseudo_transcript_0	0.306345	0.0817022	4	4	pseudo_transcript_0	0.0713216	-0.123324	4	4	pseudo_transcript_0	0.455548	-0.033899	1	1	pseudo_transcript_0	0.208828	0.0764394	6	6	pseudo_transcript_0	0.0306408	0.247334	8	8	pseudo_transcript_0	0.0420116	0.125948	5	5	pseudo_transcript_0	0.0854816	1.45086	6	6	pseudo_transcript_0	0.633026	0.271955	4	4	pseudo_transcript_0	0.398553	0.402223	2	2
DUSP14	P1	0.027543	-0.0917187	5	5	P2	0.0345028	-0.121019	3	3	P1	0.0726906	-0.0541765	3	3	P1	0.0659344	0.12741	4	4	P2	0.460718	0.0544759	2	2	P1	0.0361243	0.125939	2	2	P2	0.148098	-0.88175	4	4	P2	0.616009	-0.537904	2	2	P2	0.531087	-0.586844	2	2
pseudo_10340	pseudo_transcript_0	0.209784	-0.0790396	4	4	pseudo_transcript_0	0.971534	-0.00681233	4	4	pseudo_transcript_0	0.0404468	-0.101014	2	2	pseudo_transcript_0	0.833834	0.0252684	3	3	pseudo_transcript_0	0.35589	-0.097963	5	5	pseudo_transcript_0	0.133762	0.12591	1	1	pseudo_transcript_0	0.518031	-0.536673	7	7	pseudo_transcript_0	0.179721	-0.786789	3	3	pseudo_transcript_0	0.625748	-0.264618	3	3
pseudo_6033	pseudo_transcript_0	0.749525	-0.00628598	5	5	pseudo_transcript_0	0.285619	-0.0664515	4	4	pseudo_transcript_0	0.466766	-0.0290321	3	3	pseudo_transcript_0	0.413517	0.0880176	5	5	pseudo_transcript_0	0.0744386	-0.148409	4	4	pseudo_transcript_0	0.133762	0.12591	1	1	pseudo_transcript_0	0.249871	0.435949	3	3	pseudo_transcript_0	0.0121015	-1.91832	4	4	pseudo_transcript_0	0.806141	-0.0949168	1	1
pseudo_9164	pseudo_transcript_0	0.107527	-0.111922	7	7	pseudo_transcript_0	0.306388	-0.0599528	3	3	pseudo_transcript_0	0.026694	-0.117746	2	2	pseudo_transcript_0	0.0750545	0.182211	7	7	pseudo_transcript_0	0.961565	-0.00336953	1	1	pseudo_transcript_0	0.133762	0.12591	1	1	pseudo_transcript_0	0.714063	0.381612	8	8	pseudo_transcript_0	0.382909	-0.817666	1	1	pseudo_transcript_0	0.806141	-0.0949168	1	1
CSNK2A1	P1P2	0.217945	0.0854452	6	6	P1P2	0.196364	0.0831244	5	5	P1P2	0.223697	0.0499	3	3	P1P2	0.240059	0.0778975	7	7	P1P2	0.0120539	0.162932	7	7	P1P2	0.0119791	0.125902	6	6	P1P2	0.000974737	1.60399	7	7	P1P2	0.00466976	1.75679	6	6	P1P2	0.00331049	1.38189	5	5
pseudo_3131	pseudo_transcript_0	0.697548	-0.0451695	5	5	pseudo_transcript_0	0.0252424	-0.110938	4	4	pseudo_transcript_0	0.193779	-0.0416488	3	3	pseudo_transcript_0	0.659479	-0.0558823	6	6	pseudo_transcript_0	0.231468	0.11348	6	6	pseudo_transcript_0	0.0101923	0.125871	3	3	pseudo_transcript_0	0.993962	0.0102656	5	5	pseudo_transcript_0	0.696708	0.300174	3	3	pseudo_transcript_0	0.493841	0.388586	3	3
AK3	P1P2	0.876489	-0.0172935	6	6	P1P2	0.0155014	-0.0976021	7	7	P1P2	0.226978	-0.023588	4	4	P1P2	0.450042	0.0305629	10	10	P1P2	0.0156438	0.17611	8	8	P1P2	0.0243499	0.125866	8	8	P1P2	0.954319	0.143641	6	6	P1P2	0.816695	0.436328	5	5	P1P2	0.0510917	1.06764	2	2
pseudo_8461	pseudo_transcript_0	0.854406	0.0094577	4	4	pseudo_transcript_0	0.139204	-0.0670022	3	3	pseudo_transcript_0	0.07186	-0.0589107	3	3	pseudo_transcript_0	0.235558	0.0837407	2	2	pseudo_transcript_0	0.276377	0.030913	4	4	pseudo_transcript_0	0.0348423	0.125798	2	2	pseudo_transcript_0	0.298222	0.69983	3	3	pseudo_transcript_0	0.24765	0.73487	5	5	pseudo_transcript_0	0.27539	0.482957	2	2
FAM131A	P1P2	0.602791	-0.0435902	3	3	P1P2	0.883312	-0.00306934	5	5	P1P2	0.568005	-0.0381873	2	2	P1P2	0.0621589	0.0917197	5	5	P1P2	0.0281311	0.211008	5	5	P1P2	0.0242056	0.12577	3	3	P1P2	0.544915	-0.290531	4	4	P1P2	0.25999	0.62727	3	3	P1P2	0.431324	0.44661	1	1
pseudo_11664	pseudo_transcript_0	0.296245	-0.0605761	7	7	pseudo_transcript_0	0.964531	0.00597354	4	4	pseudo_transcript_0	0.958798	0.00654108	4	4	pseudo_transcript_0	0.335332	0.0408817	7	7	pseudo_transcript_0	0.158596	0.150871	4	4	pseudo_transcript_0	0.0988063	0.125687	4	4	pseudo_transcript_0	0.760904	0.341833	6	6	pseudo_transcript_0	0.43815	0.715354	2	2	pseudo_transcript_0	0.184908	0.959678	2	2
FMO5	P1P2	0.143602	-0.153237	6	6	P1P2	0.622499	-0.00949648	6	6	P1P2	0.166354	-0.0592269	4	4	P1P2	0.00223849	0.183584	8	8	P1P2	0.0762625	0.161836	4	4	P1P2	0.00574546	0.125647	4	4	P1P2	0.706766	0.953292	6	6	P1P2	0.0899657	1.01536	4	4	P1P2	0.251405	0.434789	4	4
EFCAB13	P1P2	0.849411	0.0103308	5	5	P1P2	0.0210241	0.114963	3	3	P1P2	0.226283	0.0541888	2	2	P1P2	0.727605	-0.0810553	6	6	P1P2	0.0697487	0.145193	4	4	P1P2	0.0427231	0.125635	2	2	P1P2	0.969106	0.0120054	5	5	P1P2	0.0860883	2.25132	1	1
PTH2R						ENST00000272847.2	0.266034	-0.0560477	3	3						ENST00000272847.2	0.324573	0.0802077	1	1	ENST00000272847.2	0.203319	0.124974	6	6	ENST00000272847.2	0.134146	0.125607	1	1						ENST00000272847.2	0.288387	-1.08365	1	1
CXorf48	P1P2	0.024862	-0.123934	3	3	P1P2	0.112038	0.0777226	3	3	P1P2	0.824328	0.0152255	2	2	P1P2	0.0541939	0.133386	2	2	P1P2	0.817289	-0.0548994	4	4	P1P2	0.134146	0.125568	1	1	P1P2	0.379412	0.619124	1	1	P1P2	0.0882694	1.16165	2	2	P1P2	0.137646	1.13961	1	1
pseudo_12424	pseudo_transcript_0	0.740762	-0.0154678	3	3	pseudo_transcript_0	0.130763	-0.0902349	3	3	pseudo_transcript_0	0.118861	-0.116785	1	1	pseudo_transcript_0	0.928859	0.00352562	2	2	pseudo_transcript_0	0.213137	0.0823469	4	4	pseudo_transcript_0	0.0406235	0.125537	2	2	pseudo_transcript_0	0.803957	-0.00208625	6	6	pseudo_transcript_0	0.658171	0.202258	3	3	pseudo_transcript_0	0.520271	-0.354045	1	1
pseudo_4080	pseudo_transcript_0	0.937431	0.0595749	7	7	pseudo_transcript_0	0.720388	0.0175001	4	4	pseudo_transcript_0	0.560034	-0.00359176	4	4	pseudo_transcript_0	0.0379413	0.160065	4	4	pseudo_transcript_0	0.0551019	0.148676	5	5	pseudo_transcript_0	0.0104465	0.125482	3	3	pseudo_transcript_0	0.0572144	0.821281	3	3	pseudo_transcript_0	0.0566567	0.938298	3	3	pseudo_transcript_0	0.153926	1.01968	1	1
OIT3	P1P2	0.585202	-0.0556888	6	6	P1P2	0.40433	0.00876297	4	4	P1P2	0.820038	-0.0179753	4	4	P1P2	0.0410633	0.199647	5	5	P1P2	0.559115	0.0366655	5	5	P1P2	0.161337	0.125446	4	4	P1P2	0.0237345	1.10774	7	7	P1P2	0.140856	0.863018	7	7	P1P2	0.0279113	0.779984	6	6
ADAMTS1	P1	0.736077	0.0367411	5	5	P1	0.106158	0.0914701	7	7	P2	0.63377	0.0154717	5	5	P2	0.617826	0.0186512	5	5	P2	0.257803	0.156825	6	6	P2	0.0609979	0.125407	2	2	P1	0.266683	1.2133	6	6	P2	0.0726895	1.19825	7	7	P1	0.85706	0.0834047	3	3
pseudo_12834	pseudo_transcript_0	0.792941	-0.0089646	3	3	pseudo_transcript_0	0.10166	-0.126848	6	6	pseudo_transcript_0	0.217776	-0.0402836	3	3	pseudo_transcript_0	0.900646	-0.0105486	4	4	pseudo_transcript_0	0.384347	0.113475	8	8	pseudo_transcript_0	0.0690824	0.125322	4	4	pseudo_transcript_0	0.79141	-0.127491	6	6	pseudo_transcript_0	0.901029	-0.635094	6	6	pseudo_transcript_0	0.680535	-0.414204	5	5
RNASET2	P1P2	0.876308	0.0396125	4	4	P1P2	0.298677	-0.0806421	6	6	P1P2	0.812929	-0.00164447	3	3	P1P2	0.0674741	0.125915	4	4	P1P2	0.212572	0.106053	3	3	P1P2	0.035754	0.125246	2	2	P1P2	0.0129256	1.33225	4	4	P1P2	0.408698	0.405663	3	3	P1P2	0.0514339	1.12889	2	2
NCF1	ENST00000289473.4	0.613439	-0.0597844	7	7											ENST00000289473.4	0.862163	0.120894	7	7	ENST00000289473.4	0.0194722	0.159959	3	3	ENST00000289473.4	0.140626	0.125221	2	2	ENST00000289473.4	0.377554	-0.424449	6	6
CHEK2	P1P2	0.160959	-0.111566	4	4	P1P2	0.0452423	-0.132151	6	6	P1P2	0.017856	-0.111662	3	3	P1P2	0.0835678	0.0819987	3	3	P1P2	0.0103601	0.235699	6	6	P1P2	0.0465028	0.125127	2	2	P1P2	0.553352	-0.435389	6	6	P1P2	0.0390685	1.38587	5	5	P1P2	0.251405	0.478587	4	4
CCDC93	P1P2	0.310537	-0.0605262	6	6	P1P2	0.728393	-0.0678761	2	2	P1P2	0.542202	-0.0545475	2	2	P1P2	0.0635438	0.0804074	7	7	P1P2	0.70661	0.0746748	4	4	P1P2	0.0550471	0.125124	4	4	P1P2	0.221964	1.024	7	7	P1P2	0.153815	0.84578	2	2	P1P2	0.506938	0.286352	2	2
SLPI	P1P2	0.481513	-0.068941	8	8	P1P2	0.590575	-0.0696024	6	6	P1P2	0.392205	-0.0550612	5	5	P1P2	0.337381	0.105923	9	9	P1P2	0.197184	0.135524	5	5	P1P2	0.0201278	0.125075	4	4	P1P2	0.766709	-0.118475	7	7	P1P2	0.0527949	0.902267	4	4	P1P2	0.385642	0.41296	4	4
SPNS2	P1P2	0.444909	-0.0406198	3	3	P1P2	0.399873	-0.0651728	1	1	P1P2	0.121023	-0.1156	1	1	P1P2	0.459786	0.0358392	3	3	P1P2	0.297793	0.0911619	3	3	P1P2	0.134146	0.125046	1	1	P1P2	0.0270363	-1.34542	4	4	P1P2	0.560769	0.453869	1	1	P1P2	0.899933	-0.024395	1	1
TMEM182	P2	0.0863608	-0.101848	6	6	P1	0.265261	-0.0699234	2	2	P2	0.27123	-0.0589332	1	1	P1	0.328214	-0.105959	5	5	P1	0.0723066	0.153872	5	5	P2	0.0388094	0.125046	2	2	P2	0.147951	-1.14246	5	5	P2	0.163459	0.702846	3	3	P2	0.738412	-0.164162	2	2
pseudo_4332	pseudo_transcript_0	0.891225	-0.0299856	4	4	pseudo_transcript_0	0.4299	-0.071828	8	8	pseudo_transcript_0	0.147768	-0.0683111	4	4	pseudo_transcript_0	0.131195	0.140035	4	4	pseudo_transcript_0	0.210076	0.0633551	7	7	pseudo_transcript_0	0.0149251	0.125033	3	3	pseudo_transcript_0	0.210473	0.743532	5	5	pseudo_transcript_0	0.800413	-0.034322	7	7	pseudo_transcript_0	0.224946	0.694132	5	5
CSK	P1P2	0.400166	-0.0822569	7	7	P1P2	0.18507	-0.0967453	3	3	P1P2	0.0580684	-0.155031	2	2	P1P2	0.00474932	0.226902	7	7	P1P2	0.157903	0.0943747	5	5	P1P2	0.0265576	0.125022	5	5	P1P2	0.63426	0.404174	6	6	P1P2	0.501146	-0.491635	3	3	P1P2	0.479918	-0.290284	3	3
PRR21	ENST00000408934.1	0.130633	-0.0943947	6	6	ENST00000408934.1	0.336413	-0.0663787	4	4	ENST00000408934.1	0.0314928	-0.0796393	3	3	ENST00000408934.1	0.296562	0.165911	6	6	ENST00000408934.1	0.9048	0.0571758	7	7	ENST00000408934.1	0.253204	0.124925	6	6	ENST00000408934.1	0.420381	-0.36851	5	5	ENST00000408934.1	0.638354	-0.802436	5	5	ENST00000408934.1	0.95523	-0.107591	3	3
pseudo_18733	pseudo_transcript_0	0.97205	0.00248315	3	3	pseudo_transcript_0	0.174402	-0.120396	4	4	pseudo_transcript_0	0.153997	-0.0619162	2	2	pseudo_transcript_0	0.499898	0.0175437	5	5	pseudo_transcript_0	0.00399338	0.176668	6	6	pseudo_transcript_0	0.0278312	0.124813	4	4	pseudo_transcript_0	0.964658	0.123443	4	4	pseudo_transcript_0	0.265329	0.789323	4	4	pseudo_transcript_0	0.529957	0.239444	3	3
GPN1	P1P2	0.753761	0.0335206	6	6	P1P2	0.140566	-0.0956632	3	3	P1P2	0.133207	-0.0442043	3	3	P1P2	0.933194	0.0125899	5	5	P1P2	0.0352718	0.240521	4	4	P1P2	0.0723096	0.124661	4	4	P1P2	0.618711	-0.291096	6	6	P1P2	0.770325	0.127275	3	3	P1P2	0.725471	-0.165631	2	2
STOML2	P1P2	0.763901	-0.0305494	4	4	P1P2	0.534314	-0.0469	3	3	P1P2	0.0432872	-0.129182	2	2	P1P2	0.0157175	0.166383	3	3	P1P2	0.0857632	0.105698	3	3	P1P2	0.0578874	0.124647	2	2	P1P2	0.552809	1.27241	6	6	P1P2	0.493516	-0.434455	3	3	P1P2	0.490564	0.428641	2	2
ETNK1	P1P2	0.356289	-0.0389749	3	3	P1P2	0.852107	-0.0229014	3	3	P1P2	0.186722	-0.0645855	2	2	P1P2	0.110015	0.0955395	3	3	P1P2	0.139815	0.153748	4	4	P1P2	0.0298709	0.124644	3	3	P1P2	0.757192	0.282539	4	4	P1P2	0.307827	0.0786408	5	5	P1P2	0.0684987	0.827298	2	2
SIX3	P1P2	0.882645	0.00860105	3	3	P1P2	0.649787	-0.0568091	5	5	P1P2	0.482946	-0.0322889	3	3	P1P2	0.583923	-0.0313093	6	6	P1P2	0.0415864	0.261305	6	6	P1P2	0.103804	0.124617	6	6	P1P2	0.450548	0.389961	2	2	P1P2	0.384869	0.748969	4	4	P1P2	0.40499	0.534669	2	2
KIR2DL3	P1P2	0.0973842	0.109055	3	3	P1P2	0.297868	-0.0554695	2	2						P1P2	0.473167	0.033196	3	3	P1P2	0.480261	0.0515573	3	3	P1P2	0.134146	0.124565	1	1	P1P2	0.335737	0.447923	3	3	P1P2	0.565111	0.355189	2	2
GJB1	P1	0.836342	0.0356927	7	7	P1	0.354943	-0.0955365	4	4	P1	0.100335	-0.104503	4	4	P2	0.690497	0.0128976	5	5	P2	0.816649	-0.0366671	7	7	P1	0.12331	0.124539	3	3	P2	0.579755	-0.157006	6	6	P2	0.207273	-0.872614	4	4	P2	0.951503	-0.00165264	3	3
OR2M7	ENST00000317965.2	0.154956	-0.0580765	4	4	ENST00000317965.2	0.0496936	-0.13053	3	3	ENST00000317965.2	0.269652	-0.0598458	1	1	ENST00000317965.2	0.349173	0.0361187	7	7	ENST00000317965.2	0.00864925	0.232745	7	7	ENST00000317965.2	0.00569119	0.124414	6	6	ENST00000317965.2	0.638726	-0.487171	4	4	ENST00000317965.2	0.481741	0.369932	4	4	ENST00000317965.2	0.277921	0.442445	2	2
POU5F2	P1P2	0.589128	0.0920416	7	7	P1P2	0.0106955	-0.136885	6	6	P1P2	0.309603	-0.0829191	5	5	P1P2	0.172307	0.134531	8	8	P1P2	0.16316	0.0772784	9	9	P1P2	0.0951779	0.124391	8	8	P1P2	0.443787	0.50767	6	6	P1P2	0.747805	-0.875168	6	6	P1P2	0.881704	-0.0680948	4	4
ZNF668	ENST00000417110.2	0.778354	0.0201042	4	4	ENST00000417110.2	0.04429	-0.143821	2	2	ENST00000417110.2	0.151053	-0.0547999	2	2	ENST00000417110.2	0.41974	0.0382052	3	3	ENST00000417110.2	0.18073	0.161421	4	4	ENST00000417110.2	0.0490245	0.124336	3	3	ENST00000417110.2	0.764143	0.0990568	5	5	ENST00000417110.2	0.784403	-0.0361287	4	4	ENST00000417110.2	0.326196	0.969682	2	2
pseudo_13005	pseudo_transcript_0	0.691635	0.0600689	5	5	pseudo_transcript_0	0.0212411	-0.211052	5	5	pseudo_transcript_0	0.643214	-0.0477377	2	2	pseudo_transcript_0	0.125584	0.192836	10	10	pseudo_transcript_0	0.25685	0.0647056	4	4	pseudo_transcript_0	0.0524745	0.124292	4	4	pseudo_transcript_0	0.315446	0.371658	5	5	pseudo_transcript_0	0.101391	1.83671	1	1
GNB2L1	P1P2	0.609444	-0.0256932	2	2	P1P2	0.775557	-0.0423196	2	2	P1P2	0.608658	0.0327837	1	1	P1P2	0.0259222	0.190318	4	4	P1P2	0.856594	0.0187497	1	1	P1P2	0.134146	0.124258	1	1	P1P2	0.104147	0.803008	3	3	P1P2	0.836396	0.155773	2	2	P1P2	0.0915202	1.63771	1	1
pseudo_9643	pseudo_transcript_0	0.0187392	-0.128214	4	4	pseudo_transcript_0	0.453635	0.0432379	4	4	pseudo_transcript_0	0.273732	-0.0359244	2	2	pseudo_transcript_0	0.0625224	0.0927639	3	3	pseudo_transcript_0	0.212457	0.0627315	4	4	pseudo_transcript_0	0.0374464	0.124244	2	2	pseudo_transcript_1	0.0930976	-0.905429	4	4	pseudo_transcript_0	0.654979	0.118214	4	4	pseudo_transcript_1	0.179274	-0.795758	2	2
TRIM29	P1	0.174184	-0.12074	5	5	P1	0.183453	0.0794582	4	4	P2	0.256341	-0.0392566	3	3	P2	0.212852	0.127095	6	6	P1	0.148588	-0.111543	2	2	P2	0.036686	0.124218	2	2	P2	0.645935	0.074325	5	5	P1	0.753048	-0.384163	4	4	P1	0.550988	0.340565	1	1
COA6	P1P2	0.393364	-0.0354218	3	3	P1P2	0.206707	-0.0756745	4	4	P1P2	0.348844	-0.0457518	1	1	P1P2	0.348752	0.04967	3	3	P1P2	0.13271	0.109644	2	2	P1P2	0.134146	0.124211	1	1	P1P2	0.698933	0.195882	2	2	P1P2	0.144981	0.857204	3	3	P1P2	0.916007	-0.0152936	1	1
CRYAA	P2	0.606611	0.0184286	5	5	P1	0.0734189	-0.134817	5	5	P1	0.376857	-0.0512669	4	4	P2	0.216922	0.172261	7	7	P1	0.0227755	0.15508	6	6	P2	0.134146	0.1242	1	1	P1	0.775372	0.366381	5	5	P1	0.578273	0.496297	6	6	P1	0.123189	0.574462	3	3
ANAPC2	P1P2	0.740762	-0.0163826	3	3	P1P2	0.251518	-0.0661637	2	2	P1P2	0.320016	-0.0455695	2	2	P1P2	0.482855	0.0505575	3	3	P1P2	0.261212	0.0840845	3	3	P1P2	0.0676349	0.124184	2	2	P1P2	0.562931	0.223671	3	3	P1P2	0.111771	0.946175	2	2	P1P2	0.118558	0.658441	2	2
FBLN7	P1P2	0.393743	0.103551	4	4	P1P2	0.0730919	0.0977014	2	2	P1P2	0.516998	0.055515	2	2	P1P2	0.384729	0.100559	2	2	P1P2	0.448467	0.0527614	2	2	P1P2	0.134146	0.12416	1	1	P1P2	0.876615	0.0919683	3	3	P1P2	0.566398	0.26052	3	3	P1P2	0.797519	0.127088	2	2
N4BP2	P1P2	0.730754	-0.0412938	4	4	P1P2	0.849622	-0.00882214	3	3	P1P2	0.108502	-0.124962	1	1	P1P2	0.48282	0.0726543	6	6	P1P2	0.877008	0.0162112	1	1	P1P2	0.134146	0.124123	1	1	P1P2	0.854454	-0.086795	3	3	P1P2	0.303987	-0.77138	2	2	P1P2	0.742486	-0.163712	1	1
LTF	P1P2	0.303506	-0.0616182	5	5	P1P2	0.223091	0.0225884	5	5	P1P2	0.92991	0.0103784	3	3	P1P2	0.929952	0.0143838	6	6	P1P2	0.595037	0.0348111	3	3	P1P2	0.0543824	0.124103	2	2	P1P2	0.187173	-0.413612	8	8	P1P2	0.83607	-0.162863	3	3	P1P2	0.910601	-0.0220859	3	3
INSM1	P1P2	0.638183	-0.0254553	7	7	P1P2	0.0795415	0.0207692	7	7	P1P2	0.438576	0.0651563	5	5	P1P2	0.0399672	0.163173	8	8	P1P2	0.560152	0.0643631	7	7	P1P2	0.0883914	0.12408	6	6	P1P2	0.63129	0.532194	9	9	P1P2	0.0277251	1.54533	8	8	P1P2	0.128856	0.958546	7	7
ZNF540	P1	0.183086	0.108208	5	5	P2	0.516166	-0.074283	7	7	P2	0.482949	-0.0140242	6	6	P2	0.162716	0.175589	10	10	P2	0.429124	0.0795466	7	7	P2	0.0974566	0.124059	7	7	P2	0.226552	1.14564	7	7	P2	0.359601	-0.664027	5	5	P1	0.779868	0.12258	2	2
SHF	P2	0.46885	0.0560231	5	5	P2	0.0397563	0.0968274	5	5	P1	0.0626285	-0.0922689	2	2	P2	0.284973	-0.0582659	6	6	P2	0.458153	-0.104403	5	5	P1	0.134146	0.123935	1	1	P1	0.524028	-0.338979	3	3	P2	0.306999	0.924787	5	5	P1	0.310544	0.576566	1	1
IL31RA	P1	0.359291	-0.115276	8	8	P2	0.136512	0.0701912	3	3	P1	0.119318	-0.114352	6	6	P1	0.93759	0.0454727	7	7	P1	0.0504331	0.169505	7	7	P1	0.0833252	0.123927	6	6	P1	0.220272	-0.831522	8	8	P1	0.271972	1.43134	6	6	P2	0.690879	0.252411	3	3
pseudo_13496	pseudo_transcript_0	0.724662	-0.0883687	6	6	pseudo_transcript_0	0.92449	0.00152254	2	2	pseudo_transcript_0	0.0889079	-0.181444	1	1	pseudo_transcript_0	0.77908	0.0685335	7	7	pseudo_transcript_0	0.585588	-0.0467178	5	5	pseudo_transcript_0	0.0433705	0.123899	2	2	pseudo_transcript_0	0.529331	-0.577912	5	5	pseudo_transcript_0	0.369361	0.467099	3	3	pseudo_transcript_0	0.486642	-0.384206	1	1
pseudo_14426	pseudo_transcript_0	0.718142	-0.0316933	7	7	pseudo_transcript_0	0.49535	-0.0521572	5	5	pseudo_transcript_0	0.700334	0.00212648	5	5	pseudo_transcript_0	0.322468	0.0659293	6	6	pseudo_transcript_0	0.0827708	0.216203	4	4	pseudo_transcript_0	0.0368748	0.12381	2	2	pseudo_transcript_0	0.587006	0.0803418	6	6	pseudo_transcript_0	0.781402	0.14767	2	2	pseudo_transcript_0	0.850391	0.12049	1	1
pseudo_9844	pseudo_transcript_0	0.836887	-0.0238387	5	5	pseudo_transcript_0	0.885544	0.00538335	3	3	pseudo_transcript_0	0.697659	-0.0092277	3	3	pseudo_transcript_0	0.564438	0.0577211	3	3	pseudo_transcript_0	0.610016	0.0532367	5	5	pseudo_transcript_0	0.134532	0.123732	1	1	pseudo_transcript_0	0.879054	-0.0770653	2	2	pseudo_transcript_0	0.104744	0.920917	3	3	pseudo_transcript_0	0.959561	0.0681791	1	1
TMEM71	P1P2	0.126966	-0.11162	4	4	P1P2	0.482978	0.055358	2	2	P1P2	0.573235	-0.0332584	2	2	P1P2	0.0226013	0.154981	4	4	P1P2	0.1704	0.10329	4	4	P1P2	0.0168993	0.1237	3	3	P1P2	0.959103	0.205764	4	4	P1P2	0.663078	0.19585	3	3	P1P2	0.647513	0.21127	2	2
pseudo_4926	pseudo_transcript_0	0.848948	0.000431073	4	4	pseudo_transcript_0	0.0829861	-0.132414	6	6	pseudo_transcript_0	0.311267	-0.0294114	3	3	pseudo_transcript_0	0.0969265	0.132844	4	4	pseudo_transcript_0	0.392369	0.051887	5	5	pseudo_transcript_0	0.0570971	0.123641	3	3	pseudo_transcript_0	0.0625338	1.15548	4	4	pseudo_transcript_0	0.672299	-0.422623	7	7	pseudo_transcript_0	0.429834	0.355598	3	3
GAP43	P1P2	0.0054282	-0.133301	5	5	P1P2	0.230746	-0.0910326	4	4	P1P2	0.0557295	-0.101302	2	2	P1P2	0.0587382	0.168603	5	5	P1P2	0.158076	0.174591	6	6	P1P2	0.0217403	0.123624	3	3	P1P2	0.820792	0.141035	4	4	P1P2	0.257796	-0.706093	5	5	P1P2	0.52173	-0.243533	2	2
PGA4	ENST00000378149.3	0.0556125	-0.0819973	4	4	ENST00000378149.3	0.0766464	-0.131019	4	4	ENST00000378149.3	0.0382419	-0.114804	2	2	ENST00000378149.3	0.518517	0.0786734	5	5	ENST00000378149.3	0.151071	0.127613	5	5	ENST00000378149.3	0.117273	0.123553	4	4	ENST00000378149.3	0.526492	0.626818	6	6	ENST00000378149.3	0.0416625	1.14404	3	3	ENST00000378149.3	0.157007	0.55937	3	3
SNX11	P1P2	0.597322	0.0767854	5	5	P1P2	0.00662549	-0.212071	6	6	P1P2	0.272473	-0.0418547	3	3	P1P2	0.895184	0.00814739	7	7	P1P2	0.211206	0.146903	8	8	P1P2	0.132697	0.123547	6	6	P1P2	0.429953	0.242017	7	7	P1P2	0.910714	-0.204712	6	6	P1P2	0.776302	-0.000822094	5	5
DUSP18	P1P2	0.468288	0.137266	7	7	P1P2	0.882479	0.0144945	6	6	P1P2	0.639815	0.00768153	6	6	P1P2	0.162268	0.0683409	7	7	P1P2	0.0337176	0.169528	7	7	P1P2	0.0224071	0.123539	6	6	P1P2	0.820849	0.707502	8	8	P1P2	0.408558	0.456514	5	5	P1P2	0.349441	0.580406	5	5
ROPN1	P1P2	0.674333	0.0263079	4	4	P1P2	0.312112	-0.0616939	7	7	P1P2	0.515782	0.0101062	4	4	P1P2	0.306305	0.0435544	7	7	P1P2	0.142749	0.102199	7	7	P1P2	0.0431598	0.12351	5	5	P1P2	0.776198	0.191067	4	4	P1P2	0.896664	-0.225628	5	5	P1P2	0.877305	0.0567026	3	3
MAP3K13	P1	0.437754	-0.0321292	3	3	P2	0.215597	-0.212327	8	8	P1	0.318769	-0.0361236	2	2	P1	0.06441	0.228619	6	6	P1	0.636747	0.0393623	4	4	P1	0.0147498	0.123483	3	3	P2	0.385471	-0.669425	7	7	P1	0.354434	0.754453	1	1	P2	0.306098	-0.271772	4	4
pseudo_10762	pseudo_transcript_0	0.437264	0.0288656	5	5	pseudo_transcript_0	0.297773	-0.0503507	3	3	pseudo_transcript_0	0.225902	-0.0717422	1	1	pseudo_transcript_0	0.31443	-0.0541145	4	4	pseudo_transcript_0	0.196735	0.0893954	3	3	pseudo_transcript_0	0.135305	0.123476	1	1	pseudo_transcript_0	0.506917	0.414776	4	4	pseudo_transcript_0	0.153146	0.982167	4	4	pseudo_transcript_0	0.178993	0.447319	3	3
pseudo_9631	pseudo_transcript_0	0.501093	-0.0611277	5	5	pseudo_transcript_0	0.662932	-0.0349028	6	6	pseudo_transcript_0	0.203506	-0.0444411	4	4	pseudo_transcript_0	0.715175	0.00671012	3	3	pseudo_transcript_0	0.376753	0.0950319	5	5	pseudo_transcript_0	0.135305	0.123476	1	1	pseudo_transcript_0	0.679078	0.317798	4	4	pseudo_transcript_0	0.251723	1.32515	5	5	pseudo_transcript_0	0.649129	0.154302	3	3
GATC	P1P2	0.716462	0.00169046	6	6	P1P2	0.0247516	-0.186301	5	5	P1P2	0.010058	-0.110234	3	3	P1P2	0.636687	0.0705009	5	5	P1P2	0.318415	0.0200057	7	7	P1P2	0.0563724	0.123425	4	4	P1P2	0.361452	0.123342	5	5	P1P2	0.945209	0.151724	5	5	P1P2	0.889427	0.0638507	2	2
OSBPL6	P1P2	0.0370684	-0.103521	3	3	P1P2	0.6398	-0.0210123	3	3	P1P2	0.293995	-0.054279	1	1	P1P2	0.342299	0.0388196	4	4	P1P2	0.194519	0.0737924	3	3	P1P2	0.135693	0.12342	1	1	P1P2	0.962391	-0.0216244	3	3	P1P2	0.171743	0.612668	4	4	P1P2	0.324786	0.400073	2	2
pseudo_10684	pseudo_transcript_0	0.0567322	-0.0897471	5	5	pseudo_transcript_0	0.786888	0.0126034	2	2	pseudo_transcript_0	0.77561	-0.00785654	1	1	pseudo_transcript_0	0.134801	0.11412	4	4	pseudo_transcript_0	0.231468	0.209625	6	6	pseudo_transcript_0	0.041248	0.123379	3	3	pseudo_transcript_0	0.807611	-0.181762	5	5	pseudo_transcript_0	0.827047	-0.140247	2	2	pseudo_transcript_0	0.81305	-0.0439889	2	2
CEBPG	P1P2	0.852073	0.014222	2	2	P1P2	0.975451	-0.00268541	1	1						P1P2	0.817361	0.0161612	1	1	P1P2	0.651361	0.016672	3	3	P1P2	0.135693	0.123312	1	1	P1P2	0.260954	0.847659	1	1
CUL4B	P1P2	0.764883	0.0673541	6	6	P1P2	0.0211036	0.11614	5	5	P1P2	0.0720255	0.104526	3	3	P1P2	0.96318	0.00506667	8	8	P1P2	0.493818	0.126143	6	6	P1P2	0.133379	0.123306	5	5	P1P2	0.781176	-0.12377	5	5	P1P2	0.123427	1.15263	4	4	P1P2	0.373426	0.941592	2	2
XCR1	P1P2	0.659865	0.0403572	4	4	P1P2	0.727742	0.0177505	3	3	P1P2	0.701234	-0.0112804	2	2	P1P2	0.0733504	0.137905	4	4	P1P2	0.252685	0.0806746	3	3	P1P2	0.0376386	0.123225	2	2	P1P2	0.395373	0.340718	3	3	P1P2	0.18643	1.16598	1	1	P1P2	0.412571	0.464863	1	1
pseudo_10560	pseudo_transcript_0	0.41111	-0.0358712	3	3	pseudo_transcript_0	0.492241	-0.0599802	3	3	pseudo_transcript_0	0.180872	-0.0849983	1	1	pseudo_transcript_0	0.652084	-0.0441808	2	2	pseudo_transcript_0	0.687775	0.0507185	4	4	pseudo_transcript_0	0.136082	0.123219	1	1	pseudo_transcript_0	0.107748	-0.715004	3	3	pseudo_transcript_0	0.806281	0.167369	2	2	pseudo_transcript_0	0.534853	-0.383112	2	2
pseudo_6918	pseudo_transcript_0	0.963807	-0.0167058	3	3	pseudo_transcript_0	0.0282205	-0.117801	5	5	pseudo_transcript_0	0.180872	-0.0849983	1	1	pseudo_transcript_0	0.757526	-0.0487283	4	4	pseudo_transcript_0	0.0585814	0.215998	4	4	pseudo_transcript_0	0.136082	0.123219	1	1	pseudo_transcript_0	0.411096	-0.350361	4	4	pseudo_transcript_0	0.357694	0.645679	4	4	pseudo_transcript_0	0.481591	0.283835	2	2
pseudo_16927	pseudo_transcript_0	0.72038	0.011854	5	5	pseudo_transcript_1	0.73523	-0.0324496	4	4	pseudo_transcript_1	0.586815	0.0136465	3	3	pseudo_transcript_0	0.218695	0.105638	5	5	pseudo_transcript_1	0.158945	0.188045	7	7	pseudo_transcript_1	0.024848	0.123179	5	5	pseudo_transcript_1	0.303596	0.704929	3	3	pseudo_transcript_1	0.0286672	1.47021	4	4	pseudo_transcript_1	0.0300374	1.08757	3	3
TEX26	P1P2	0.449963	-0.0211218	5	5	P1P2	0.0244299	-0.18549	4	4	P1P2	0.0335518	-0.116176	4	4	P1P2	0.026322	0.135818	5	5	P1P2	0.0372613	0.130746	3	3	P1P2	0.0143364	0.12315	3	3	P1P2	0.219739	0.827989	4	4	P1P2	0.36896	-0.703878	3	3	P1P2	0.590568	0.131512	3	3
ACOT12	P1P2	0.988085	-0.00370571	3	3	P1P2	0.372925	-0.0699359	4	4	P1P2	0.150454	0.0945047	1	1	P1P2	0.476652	0.0389573	2	2	P1P2	0.89919	-0.098304	5	5	P1P2	0.0378316	0.123079	2	2	P1P2	0.798161	-0.171208	2	2	P1P2	0.943014	-0.169444	3	3
pseudo_2624	pseudo_transcript_0	0.572916	-0.0276248	7	7	pseudo_transcript_0	0.137978	0.100665	4	4	pseudo_transcript_0	0.312269	0.0391669	3	3	pseudo_transcript_0	0.297113	0.0697355	8	8	pseudo_transcript_0	0.635852	0.0681077	7	7	pseudo_transcript_0	0.0797339	0.123056	6	6	pseudo_transcript_0	0.914955	0.0133459	7	7	pseudo_transcript_0	0.114042	0.964212	4	4	pseudo_transcript_0	0.0965142	0.562809	3	3
NTF3	P1P2	0.284758	-0.0921553	6	6	P1P2	0.759768	-0.0268331	4	4	P1P2	0.185439	-0.045842	4	4	P1P2	0.100696	0.0622659	8	8	P1P2	0.163282	0.125561	3	3	P1P2	0.0677752	0.12293	3	3	P1P2	0.724054	-0.640018	6	6	P1P2	0.763765	0.16759	2	2	P1P2	0.510615	0.279897	2	2
RWDD2A	P1P2	0.815592	0.0339789	8	8	P1P2	0.218153	0.0576903	3	3	P1P2	0.0504622	0.08444	3	3	P1P2	0.488859	0.0236391	8	8	P1P2	0.358485	0.147604	5	5	P1P2	0.0958199	0.122895	4	4	P1P2	0.691863	0.216525	7	7	P1P2	0.644172	0.253896	2	2	P1P2	0.213024	0.790663	1	1
CFI	P1P2	0.138318	-0.132426	7	7	P1P2	0.830037	-0.00103405	4	4	P1P2	0.466126	0.0306537	3	3	P1P2	0.26522	0.107088	4	4	P1P2	0.214962	0.138637	6	6	P1P2	0.0211592	0.122862	3	3	P1P2	0.958106	-0.241849	5	5	P1P2	0.62531	0.26102	3	3	P1P2	0.738412	0.137997	2	2
GCM2	P1P2	0.885454	-0.00742883	6	6	P1P2	0.918434	-0.0448633	7	7	P1P2	0.276879	-0.071843	5	5	P1P2	0.175535	0.119931	6	6	P1P2	0.00786552	0.238096	7	7	P1P2	0.0238009	0.122836	4	4	P1P2	0.648577	-0.279569	7	7	P1P2	0.00439997	1.98132	5	5	P1P2	0.111759	0.737394	4	4
CSTL1	ENST00000246020.2	0.356875	0.110282	5	5	ENST00000347397.1	0.879039	-0.00951863	3	3	ENST00000347397.1	0.0836577	-0.0634074	3	3	ENST00000347397.1	0.0556192	0.167466	8	8	ENST00000347397.1	0.116414	0.152173	4	4	ENST00000347397.1	0.0340271	0.12282	4	4	ENST00000246020.2	0.351009	1.0381	5	5	ENST00000347397.1	0.802714	0.118736	2	2	ENST00000347397.1	0.575195	0.566016	2	2
NMUR2	P1P2	0.475085	0.0372268	2	2	P1P2	0.111774	0.0807798	2	2	P1P2	0.3145	0.0627481	1	1	P1P2	0.0937146	0.224864	1	1	P1P2	0.975437	0.00313535	2	2	P1P2	0.136471	0.122814	1	1	P1P2	0.132367	1.46756	1	1	P1P2	0.351729	0.763846	1	1
pseudo_9882	pseudo_transcript_0	0.809276	0.0148834	2	2	pseudo_transcript_0	0.109345	0.0894691	2	2	pseudo_transcript_0	0.436051	0.0486863	1	1	pseudo_transcript_0	0.0614843	0.196935	5	5	pseudo_transcript_0	0.926547	-0.0439232	6	6	pseudo_transcript_0	0.0781285	0.122734	4	4	pseudo_transcript_0	0.207698	0.966965	3	3	pseudo_transcript_0	0.40021	-0.775526	1	1	pseudo_transcript_0	0.256902	0.695596	1	1
HOXD10	P1	0.0428392	0.195875	3	3	P1	0.513223	-0.0477605	7	7	P1	0.0302193	0.119119	2	2	P2	0.436199	0.0655665	5	5	P2	0.267135	0.0812815	6	6	P2	0.00853179	0.122714	4	4	P1	0.036216	2.1886	4	4	P2	0.255671	0.474723	4	4	P1	0.0224449	1.41428	4	4
LAMTOR4	P1P2	0.431865	-0.0428904	2	2	P1P2	0.923256	-0.0173724	2	2						P1P2	0.212023	0.0740132	2	2	P1P2	0.570602	0.0434118	4	4	P1P2	0.136471	0.122705	1	1	P1P2	0.520098	-0.517621	2	2	P1P2	0.656118	0.238064	2	2
pseudo_15561	pseudo_transcript_0	0.834458	0.0581016	6	6	pseudo_transcript_0	0.0389104	0.129713	7	7	pseudo_transcript_0	0.859712	0.0100307	4	4	pseudo_transcript_0	0.458824	0.109965	7	7	pseudo_transcript_0	0.43521	0.154437	8	8	pseudo_transcript_0	0.186413	0.122604	6	6	pseudo_transcript_0	0.271521	1.27259	8	8	pseudo_transcript_0	0.00355231	1.92033	8	8	pseudo_transcript_0	0.00492483	1.24367	7	7
ARL6IP5	P1P2	0.430665	-0.0402206	3	3	P1P2	0.0670513	-0.125297	3	3	P1P2	0.0270476	-0.121532	2	2	P1P2	0.533369	0.0381977	4	4	P1P2	0.0479507	0.199053	2	2	P1P2	0.136471	0.122529	1	1	P1P2	0.843575	-0.136195	1	1	P1P2	0.58563	-0.461398	1	1	P1P2	0.595156	-0.298796	1	1
pseudo_4604	pseudo_transcript_0	0.242041	-0.117066	5	5	pseudo_transcript_0	0.85753	-0.00916596	4	4	pseudo_transcript_0	0.48116	-0.021139	2	2	pseudo_transcript_0	0.351076	0.088377	4	4	pseudo_transcript_0	0.167754	0.0986738	6	6	pseudo_transcript_0	0.0453629	0.12237	2	2	pseudo_transcript_0	0.634789	-0.0754913	5	5	pseudo_transcript_0	0.672935	-0.0851867	3	3	pseudo_transcript_0	0.346361	0.379774	2	2
EFHC2	P1P2	0.719192	-0.0827056	4	4	P1P2	0.970221	0.00223472	4	4	P1P2	0.630393	-0.0270519	2	2	P1P2	0.00509501	0.168102	5	5	P1P2	0.403716	0.0522161	6	6	P1P2	0.00945891	0.122344	5	5	P1P2	0.799365	0.582141	3	3	P1P2	0.422925	0.43299	3	3	P1P2	0.322299	0.570126	1	1
pseudo_11882	pseudo_transcript_0	0.857324	-0.00637054	3	3	pseudo_transcript_0	0.0630843	-0.108457	3	3	pseudo_transcript_0	0.137028	-0.103234	1	1	pseudo_transcript_0	0.17248	0.111581	4	4	pseudo_transcript_0	0.0687007	0.153731	6	6	pseudo_transcript_0	0.0374939	0.122332	3	3	pseudo_transcript_0	0.857161	0.0778651	3	3	pseudo_transcript_0	0.258131	-0.792562	4	4	pseudo_transcript_0	0.596233	-0.213255	3	3
RABGAP1	P1P2	0.81115	-0.00991002	3	3	P1P2	0.627071	-0.0221888	4	4	P1P2	0.258778	0.0710489	1	1	P1P2	0.549408	0.0511392	3	3	P1P2	0.571915	0.0376169	6	6	P1P2	0.0498232	0.122309	2	2	P1P2	0.12913	0.670203	3	3	P1P2	0.0856726	-1.05657	5	5	P1P2	0.801433	0.149158	1	1
pseudo_16644	pseudo_transcript_0	0.0956142	-0.086139	7	7	pseudo_transcript_0	0.277767	-0.0657758	4	4	pseudo_transcript_0	0.259425	-0.0325171	3	3	pseudo_transcript_0	0.116548	0.0701908	6	6	pseudo_transcript_0	0.157812	0.0891924	8	8	pseudo_transcript_0	0.0505243	0.122303	4	4	pseudo_transcript_0	0.191931	0.70533	4	4	pseudo_transcript_0	0.162778	0.8271	3	3	pseudo_transcript_0	0.0521239	0.998682	2	2
PDIA5	P1P2	0.947335	-0.00259227	3	3	P1P2	0.368066	-0.0506937	7	7	P1P2	0.0554019	-0.0931221	2	2	P1P2	0.568161	0.0315374	2	2	P1P2	0.750671	-0.0339332	6	6	P1P2	0.136471	0.122298	1	1	P1P2	0.641781	0.179427	3	3	P1P2	0.112117	-1.08472	4	4	P1P2	0.696975	-0.197866	1	1
ZMYND8	P1P2	0.244966	0.0980988	1	1	P1P2	0.63844	-0.0253347	3	3	P1P2	0.96235	0.00816097	1	1	P1P2	0.690844	-0.0133204	3	3	P1P2	0.0948208	0.195675	5	5	P1P2	0.144619	0.122282	2	2	P1P2	0.63391	0.240246	2	2	P1P2	0.154273	0.664978	4	4	P1P2	0.661326	0.245382	1	1
pseudo_7328	pseudo_transcript_0	0.713374	0.0374329	7	7	pseudo_transcript_0	0.430575	-0.0427194	3	3	pseudo_transcript_0	0.59794	-0.0204438	2	2	pseudo_transcript_0	0.441038	-0.0146651	8	8	pseudo_transcript_0	0.0394707	0.209088	5	5	pseudo_transcript_0	0.0319603	0.122247	4	4	pseudo_transcript_0	0.77102	0.0698602	7	7	pseudo_transcript_0	0.949004	-0.0519381	3	3	pseudo_transcript_0	0.930329	0.0575836	2	2
EIF2B4	P1P2	0.452476	-0.0387819	3	3	P1P2	0.140224	-0.0982403	3	3	P1P2	0.284086	-0.0562353	1	1	P1P2	0.364519	0.0706353	5	5	P1P2	0.0750418	0.257217	5	5	P1P2	0.00799068	0.122227	4	4	P1P2	0.505711	0.547555	5	5	P1P2	0.56275	0.159192	6	6	P1P2	0.825962	0.17581	3	3
pseudo_685	pseudo_transcript_0	0.747813	-0.0248788	1	1	pseudo_transcript_0	0.764984	0.0515493	5	5						pseudo_transcript_0	0.0706199	0.111633	3	3	pseudo_transcript_0	0.708829	-0.00425841	5	5	pseudo_transcript_0	0.136862	0.122223	1	1	pseudo_transcript_0	0.509133	-0.472366	5	5	pseudo_transcript_0	0.620558	-0.38192	4	4	pseudo_transcript_0	0.460427	-0.29128	2	2
CCDC86	P1P2	0.4336	-0.0361078	5	5	P1P2	0.314274	-0.0794048	4	4	P1P2	0.140795	-0.073377	4	4	P1P2	0.708105	0.0757955	5	5	P1P2	0.0603322	0.158285	4	4	P1P2	0.0290078	0.122194	4	4	P1P2	0.923749	-0.32423	5	5	P1P2	0.610328	0.513842	5	5	P1P2	0.310907	0.363415	4	4
ABCE1	P1P2	0.451068	-0.0389728	2	2	P1P2	0.112756	-0.0748914	3	3	P1P2	0.252703	-0.0658377	1	1	P1P2	0.39139	0.0823976	2	2	P1P2	0.57692	0.0513344	1	1	P1P2	0.137253	0.122191	1	1	P1P2	0.559056	-0.212419	3	3	P1P2	0.229788	-0.683408	3	3	P1P2	0.882636	-0.0687635	2	2
pseudo_12666	pseudo_transcript_0	0.906969	-0.026504	4	4	pseudo_transcript_0	0.0358189	-0.174384	5	5	pseudo_transcript_0	0.758972	-0.009258	1	1	pseudo_transcript_0	0.116872	0.0499981	7	7	pseudo_transcript_0	0.58384	0.107478	8	8	pseudo_transcript_0	0.147611	0.122132	6	6	pseudo_transcript_0	0.62703	0.270474	4	4	pseudo_transcript_0	0.127179	-1.06507	5	5	pseudo_transcript_0	0.616402	-0.275966	1	1
NDUFAB1	P1P2	0.00854553	-0.156924	5	5	P1P2	0.928422	-0.0089091	5	5	P1P2	0.0271448	-0.0829168	3	3	P1P2	0.343905	0.103941	4	4	P1P2	0.737403	-0.0308118	3	3	P1P2	0.137253	0.122075	1	1	P1P2	0.086873	-1.24795	5	5	P1P2	0.747613	0.329145	4	4	P1P2	0.261182	0.688273	1	1
PTGS2	P1	0.680421	0.0112701	6	6	P1	0.316921	-0.0928541	4	4	P1	0.726535	-0.00392582	3	3	P1	0.428845	0.065378	7	7	P1	0.452404	0.132475	5	5	P1	0.11961	0.121979	3	3	P1	0.319145	0.580376	4	4	P1	0.509803	-0.42456	3	3	P1	0.510615	0.318067	2	2
pseudo_8038	pseudo_transcript_0	0.0283405	-0.0998624	4	4	pseudo_transcript_1	0.196243	-0.0619357	3	3	pseudo_transcript_1	0.0462944	-0.093401	2	2	pseudo_transcript_0	0.0362286	0.168458	7	7	pseudo_transcript_0	0.168393	0.0909345	5	5	pseudo_transcript_0	0.0494593	0.121942	5	5	pseudo_transcript_0	0.633837	0.227763	5	5	pseudo_transcript_1	0.430587	0.523235	4	4	pseudo_transcript_0	0.460427	-0.284102	2	2
pseudo_4512	pseudo_transcript_0	0.25984	0.0607391	5	5	pseudo_transcript_0	0.112685	-0.103226	6	6	pseudo_transcript_0	0.600995	0.0112465	4	4	pseudo_transcript_0	0.024255	0.189841	8	8	pseudo_transcript_0	0.961367	-0.00408941	5	5	pseudo_transcript_0	0.151922	0.121929	5	5	pseudo_transcript_0	0.0158874	2.19952	5	5	pseudo_transcript_0	0.959997	-0.387033	4	4	pseudo_transcript_0	0.344046	0.543419	3	3
pseudo_1944	pseudo_transcript_0	0.420915	-0.054238	5	5	pseudo_transcript_0	0.0141131	-0.109485	5	5	pseudo_transcript_0	0.0155247	-0.0920633	3	3	pseudo_transcript_1	0.545895	-0.0484141	2	2	pseudo_transcript_0	0.124034	0.135309	4	4	pseudo_transcript_0	0.0462729	0.121828	2	2	pseudo_transcript_1	0.40303	-0.446522	2	2	pseudo_transcript_0	0.339828	-0.383657	6	6	pseudo_transcript_1	0.315407	-0.634173	1	1
pseudo_4042	pseudo_transcript_0	0.528978	-0.0268368	4	4	pseudo_transcript_0	0.134227	-0.121125	4	4	pseudo_transcript_0	0.0597885	-0.107313	2	2	pseudo_transcript_0	0.752323	0.0468025	6	6	pseudo_transcript_0	0.0170778	0.196853	3	3	pseudo_transcript_0	0.0653673	0.121828	3	3	pseudo_transcript_0	0.351855	-0.68543	4	4	pseudo_transcript_0	0.657332	-0.14298	4	4	pseudo_transcript_0	0.817501	-0.109497	2	2
pseudo_16623	pseudo_transcript_0	0.320657	-0.044182	3	3	pseudo_transcript_0	0.328415	-0.0646398	2	2	pseudo_transcript_0	0.139929	-0.101932	1	1	pseudo_transcript_0	0.410503	0.0550448	3	3	pseudo_transcript_0	0.624243	0.0201569	4	4	pseudo_transcript_0	0.137646	0.121812	1	1	pseudo_transcript_0	0.707286	-0.151749	3	3	pseudo_transcript_0	0.871831	0.0854072	2	2	pseudo_transcript_0	0.793604	0.159938	1	1
pseudo_18834	pseudo_transcript_0	0.161209	-0.101889	2	2	pseudo_transcript_0	0.0156172	-0.160837	4	4						pseudo_transcript_0	0.0303395	0.159791	4	4	pseudo_transcript_0	0.787215	0.0179941	5	5	pseudo_transcript_0	0.137646	0.121812	1	1	pseudo_transcript_0	0.537524	-0.523119	5	5	pseudo_transcript_0	0.248787	-0.939107	2	2	pseudo_transcript_0	0.125704	-1.16475	1	1
pseudo_4345	pseudo_transcript_0	0.518906	-0.041226	3	3	pseudo_transcript_1	0.594017	0.0360561	1	1	pseudo_transcript_0	0.0772503	-0.0953012	2	2	pseudo_transcript_0	0.235069	-0.0834358	3	3	pseudo_transcript_0	0.666419	0.0293931	2	2	pseudo_transcript_1	0.137646	0.121812	1	1	pseudo_transcript_1	0.525152	-0.266041	3	3	pseudo_transcript_0	0.860228	0.0837995	2	2	pseudo_transcript_0	0.930329	0.040452	2	2
KRT37	P1P2	0.994042	-0.0172219	3	3	P1P2	0.815756	-0.0221692	7	7	P1P2	0.198998	-0.0698838	2	2	P1P2	0.939311	0.121264	6	6	P1P2	0.148402	0.235517	6	6	P1P2	0.264218	0.121785	4	4	P1P2	0.963073	0.412965	5	5	P1P2	0.0985477	0.911492	4	4	P1P2	0.362749	0.550635	2	2
pseudo_14408	pseudo_transcript_0	0.60092	0.0388532	6	6	pseudo_transcript_1	0.537532	-0.0446965	1	1	pseudo_transcript_0	0.465622	0.0183675	4	4	pseudo_transcript_1	0.240001	-0.0756936	4	4	pseudo_transcript_1	0.111854	0.183641	4	4	pseudo_transcript_1	0.138433	0.121685	1	1	pseudo_transcript_1	0.390241	-0.450525	5	5	pseudo_transcript_0	0.415916	0.616649	7	7	pseudo_transcript_0	0.344046	0.331752	3	3
pseudo_18185	pseudo_transcript_0	0.87489	0.0329056	6	6	pseudo_transcript_0	0.418538	-0.0443598	5	5	pseudo_transcript_0	0.942918	0.00370488	4	4	pseudo_transcript_0	0.298486	0.117156	7	7	pseudo_transcript_0	0.119419	0.12044	2	2	pseudo_transcript_0	0.138433	0.121685	1	1	pseudo_transcript_0	0.649388	0.514979	6	6	pseudo_transcript_0	0.492198	0.413208	2	2	pseudo_transcript_0	0.33907	0.555404	2	2
pseudo_5053	pseudo_transcript_0	0.715394	0.0117546	5	5	pseudo_transcript_0	0.910131	-0.0263007	3	3	pseudo_transcript_0	0.816993	-0.000153624	3	3	pseudo_transcript_0	0.182473	0.127899	5	5	pseudo_transcript_0	0.793739	0.0482898	6	6	pseudo_transcript_0	0.0112742	0.121656	4	4	pseudo_transcript_0	0.228364	1.02417	6	6	pseudo_transcript_0	0.103462	0.923732	3	3	pseudo_transcript_0	0.0335739	0.973952	3	3
pseudo_16141	pseudo_transcript_0	0.191763	-0.0798109	4	4	pseudo_transcript_0	0.50511	0.0174134	4	4	pseudo_transcript_0	0.384214	-0.0399563	3	3	pseudo_transcript_0	0.0964445	0.0869594	7	7	pseudo_transcript_0	0.559672	0.0880344	5	5	pseudo_transcript_0	0.206908	0.12163	5	5	pseudo_transcript_0	0.118683	-0.728656	5	5	pseudo_transcript_0	0.671999	0.504583	4	4	pseudo_transcript_0	0.767301	0.0563981	3	3
pseudo_1778	pseudo_transcript_0	0.784149	0.0252803	6	6	pseudo_transcript_0	0.935447	-0.0155337	5	5	pseudo_transcript_0	0.91079	0.00973774	3	3	pseudo_transcript_0	0.538286	0.0140979	5	5	pseudo_transcript_0	0.029172	0.17254	4	4	pseudo_transcript_0	0.046044	0.121579	2	2	pseudo_transcript_0	0.935779	0.0446163	5	5	pseudo_transcript_0	0.177884	1.20285	1	1	pseudo_transcript_0	0.186723	0.86213	1	1
pseudo_11301	pseudo_transcript_0	0.0255408	-0.172016	6	6	pseudo_transcript_0	0.714235	-0.0439691	4	4	pseudo_transcript_0	0.129891	-0.0474933	4	4	pseudo_transcript_0	0.345239	0.0441495	5	5	pseudo_transcript_0	0.0209978	0.182685	3	3	pseudo_transcript_0	0.0721597	0.121569	2	2	pseudo_transcript_0	0.442334	-0.391506	3	3	pseudo_transcript_0	0.0196789	1.88442	2	2	pseudo_transcript_0	0.402238	0.473085	1	1
pseudo_6757	pseudo_transcript_0	0.402427	0.0400203	5	5	pseudo_transcript_0	0.239734	-0.0564356	3	3	pseudo_transcript_0	0.473208	-0.0385001	2	2	pseudo_transcript_0	0.0253296	0.156336	5	5	pseudo_transcript_0	0.0391039	0.142845	4	4	pseudo_transcript_0	0.0860844	0.121547	2	2	pseudo_transcript_0	0.0137051	1.24842	4	4	pseudo_transcript_0	0.118624	0.781449	3	3	pseudo_transcript_0	0.115213	0.678836	2	2
pseudo_2412	pseudo_transcript_0	0.180392	-0.076309	6	6	pseudo_transcript_0	0.793847	0.0168628	4	4	pseudo_transcript_0	0.148874	-0.0547243	2	2	pseudo_transcript_0	0.221576	0.0677513	5	5	pseudo_transcript_0	0.612629	0.119627	5	5	pseudo_transcript_0	0.0272059	0.12147	3	3	pseudo_transcript_0	0.949142	0.352271	6	6	pseudo_transcript_0	0.766301	-0.180722	3	3	pseudo_transcript_0	0.946847	-0.00712682	3	3
pseudo_18654	pseudo_transcript_0	0.429368	0.0307836	8	8	pseudo_transcript_0	0.444427	0.0678295	4	4	pseudo_transcript_0	0.124914	0.0858452	4	4	pseudo_transcript_0	0.775042	-0.00118229	6	6	pseudo_transcript_0	0.242009	0.122082	4	4	pseudo_transcript_0	0.0356836	0.121467	4	4	pseudo_transcript_0	0.670573	0.245049	6	6	pseudo_transcript_0	0.0302049	1.57902	2	2	pseudo_transcript_0	0.0217504	1.47851	2	2
pseudo_6298	pseudo_transcript_0	0.748838	-0.0159319	2	2	pseudo_transcript_0	0.9247	-0.00773175	1	1	pseudo_transcript_0	0.814823	-0.00543199	1	1	pseudo_transcript_0	0.824867	-0.0151384	2	2	pseudo_transcript_0	0.0794284	0.112262	3	3	pseudo_transcript_0	0.139223	0.121388	1	1	pseudo_transcript_0	0.63944	-0.256411	2	2
pseudo_5925	pseudo_transcript_0	0.574082	-0.0375646	5	5	pseudo_transcript_0	0.497526	-0.0721635	5	5	pseudo_transcript_0	0.786234	-0.00502123	3	3	pseudo_transcript_0	0.402782	0.0935596	5	5	pseudo_transcript_0	0.112112	0.068752	6	6	pseudo_transcript_0	0.0116332	0.121264	3	3	pseudo_transcript_0	0.974978	0.0815696	4	4	pseudo_transcript_0	0.132731	0.663378	4	4	pseudo_transcript_0	0.0851815	0.921885	2	2
GDPD3	P1P2	0.764263	0.0513095	6	6	P1P2	0.0597711	-0.109197	4	4	P1P2	0.362961	-0.0281794	2	2	P1P2	0.743784	-0.049939	5	5	P1P2	0.249162	0.119878	4	4	P1P2	0.13962	0.121241	1	1	P1P2	0.647051	-0.354322	6	6	P1P2	0.109927	-1.13813	4	4	P1P2	0.0369283	-0.931884	3	3
pseudo_15935	pseudo_transcript_0	0.632372	0.0544822	4	4	pseudo_transcript_0	0.881427	-0.0193621	2	2	pseudo_transcript_0	0.13799	0.0990345	1	1	pseudo_transcript_0	0.754278	-0.0485569	6	6	pseudo_transcript_0	0.0405053	0.196207	2	2	pseudo_transcript_0	0.140018	0.121158	1	1	pseudo_transcript_0	0.816589	0.238697	5	5	pseudo_transcript_0	0.108375	-2.14427	1	1
pseudo_3546	pseudo_transcript_0	0.539459	-0.0371142	5	5	pseudo_transcript_0	0.361745	-0.0313804	5	5	pseudo_transcript_0	0.603296	0.0267413	2	2	pseudo_transcript_0	0.169979	0.101934	5	5	pseudo_transcript_0	0.986933	-0.0176153	2	2	pseudo_transcript_0	0.140018	0.121158	1	1	pseudo_transcript_0	0.341242	0.55947	7	7	pseudo_transcript_0	0.674202	0.278008	2	2	pseudo_transcript_0	0.765596	-0.128484	1	1
pseudo_9551	pseudo_transcript_0	0.82086	-0.0679514	9	9	pseudo_transcript_0	0.461603	0.0283912	3	3	pseudo_transcript_0	0.0991844	0.0762759	2	2	pseudo_transcript_0	0.641176	-0.0376158	7	7	pseudo_transcript_0	0.100174	0.25229	1	1	pseudo_transcript_0	0.140018	0.121158	1	1	pseudo_transcript_0	0.161985	-0.964778	7	7	pseudo_transcript_0	0.815574	-0.156886	2	2	pseudo_transcript_0	0.347831	-0.383193	2	2
SLC29A1	P1	0.0728413	-0.152363	7	7	P1	0.285678	0.0598733	5	5	P1	0.273315	-0.0610626	5	5	P1	0.0367776	0.137886	7	7	P2	0.0289725	0.21432	5	5	P2	0.0299816	0.121152	5	5	P1	0.653846	-0.689113	9	9	P2	0.106691	0.939843	3	3	P2	0.228326	0.661354	3	3
pseudo_18702	pseudo_transcript_0	0.196448	-0.0877403	5	5	pseudo_transcript_0	0.127511	0.0789939	4	4	pseudo_transcript_0	0.768324	-0.0147622	4	4	pseudo_transcript_0	0.176201	0.148055	7	7	pseudo_transcript_0	0.208056	0.125218	6	6	pseudo_transcript_0	0.0384783	0.121091	6	6	pseudo_transcript_0	0.649134	-0.282764	5	5	pseudo_transcript_0	0.00566667	2.15422	4	4	pseudo_transcript_0	0.0496619	1.00833	4	4
DHX30	P2	0.302598	0.0792213	4	4	P2	0.138735	-0.085612	6	6	P2	0.273965	-0.0475648	4	4	P2	0.203574	-0.0741268	4	4	P2	0.0385465	0.25066	6	6	P1	0.140416	0.121084	1	1	P1	0.409592	-0.469657	3	3	P1	0.812712	0.123978	2	2	P1	0.682034	-0.22298	1	1
FYTTD1	P1P2	0.999676	0.0207605	6	6	P1P2	0.110049	-0.105053	3	3	P1P2	0.749317	-0.00991158	1	1	P1P2	0.333424	0.0782758	5	5	P1P2	0.0481065	0.2473	6	6	P1P2	0.058706	0.121053	4	4	P1P2	0.533486	-0.0454042	7	7	P1P2	0.267807	0.629513	2	2	P1P2	0.234635	0.733843	1	1
HIST2H3A	P1P2	0.890726	-0.128289	9	9	P1P2	0.762341	0.0161647	8	8	P1P2	0.311987	-0.0311843	7	7	P1P2	0.610798	0.134953	9	9	P1P2	0.300336	0.0796337	4	4	P1P2	0.0113698	0.12104	4	4	P1P2	0.962644	-0.224591	10	10	P1P2	0.742551	-0.120777	5	5	P1P2	0.767994	0.0917873	5	5
HIST2H3C	ENST00000369158.1	0.965408	-0.128289	9	9	ENST00000369158.1	0.762341	0.0161647	8	8	ENST00000369158.1	0.311987	-0.0311843	7	7	ENST00000369158.1	0.369273	0.134953	9	9	ENST00000369158.1	0.300336	0.0796337	4	4	ENST00000369158.1	0.0113698	0.12104	4	4	ENST00000369158.1	0.644257	0.152547	10	10	ENST00000369158.1	0.742551	-0.120777	5	5	ENST00000369158.1	0.767994	0.0917873	5	5
pseudo_13567	pseudo_transcript_0	0.918188	0.00258531	5	5	pseudo_transcript_0	0.418074	0.0316721	3	3	pseudo_transcript_0	0.396355	0.0393735	2	2	pseudo_transcript_0	0.0438116	0.137158	5	5	pseudo_transcript_0	0.342758	0.0704706	6	6	pseudo_transcript_0	0.0261933	0.121027	4	4	pseudo_transcript_0	0.0868947	1.21951	6	6	pseudo_transcript_0	0.961035	-0.38367	4	4	pseudo_transcript_0	0.438079	0.2875	3	3
MYLIP	P1P2	0.396478	0.0562183	2	2	P1P2	0.688749	-0.0447448	5	5	P1P2	0.502172	-0.0190377	2	2	P1P2	0.0368127	0.157328	8	8	P1P2	0.0483298	0.127647	7	7	P1P2	0.0174675	0.121011	5	5	P1P2	0.123347	0.972519	4	4	P1P2	0.105053	0.954866	5	5	P1P2	0.0461841	0.992679	2	2
NFATC2IP	P1P2	0.269554	-0.037504	5	5	P1P2	0.661844	-0.0160862	5	5	P1P2	0.529882	-0.0260426	1	1	P1P2	0.0219957	0.153648	7	7	P1P2	0.369862	0.00609931	8	8	P1P2	0.259271	0.120966	6	6	P1P2	0.599992	-0.555062	5	5	P1P2	0.991684	-0.341014	4	4	P1P2	0.493016	-0.377319	1	1
RAE1	P1P2	0.828128	0.0249685	6	6	P1P2	0.339457	-0.072755	4	4	P1P2	0.287385	-0.0292834	3	3	P1P2	0.158999	0.115213	4	4	P1P2	0.686795	0.0322441	3	3	P1P2	0.0481389	0.120878	2	2	P1P2	0.343927	0.809474	5	5	P1P2	0.437062	0.425411	2	2	P1P2	0.205658	0.56278	2	2
pseudo_9543	pseudo_transcript_0	0.569126	-0.00926944	6	6	pseudo_transcript_0	0.454245	-0.0828244	7	7	pseudo_transcript_0	0.399782	0.00285519	4	4	pseudo_transcript_0	0.601416	0.120479	4	4	pseudo_transcript_0	0.307841	0.108479	6	6	pseudo_transcript_0	0.0643748	0.120824	3	3	pseudo_transcript_0	0.491113	0.386221	4	4	pseudo_transcript_0	0.41653	0.56716	5	5	pseudo_transcript_0	0.851064	0.0832765	2	2
TMEM185A	P1P2	0.872229	0.00679451	3	3	P1P2	0.142026	-0.152638	1	1						P1P2	0.571232	0.0376868	5	5	P1P2	0.10347	0.239863	1	1	P1P2	0.140416	0.120804	1	1	P1P2	0.494112	-0.493692	5	5
pseudo_12585	pseudo_transcript_0	0.337449	-0.04004	8	8	pseudo_transcript_0	0.256211	-0.0626291	5	5	pseudo_transcript_0	0.0602599	-0.0569309	4	4	pseudo_transcript_0	0.219131	0.0449729	6	6	pseudo_transcript_0	0.031277	0.240196	8	8	pseudo_transcript_0	0.068697	0.120773	5	5	pseudo_transcript_0	0.964679	-0.289307	6	6	pseudo_transcript_0	0.357772	0.811634	5	5	pseudo_transcript_0	0.851444	-0.112386	4	4
FCGRT	P1P2	0.438772	0.0347061	3	3	P1P2	0.0728862	-0.158319	4	4	P1P2	0.252703	-0.0655718	1	1	P1P2	0.61656	-0.0346413	4	4	P1P2	0.127814	0.112754	4	4	P1P2	0.140416	0.120773	1	1	P1P2	0.848194	-0.247965	5	5	P1P2	0.344534	-0.418514	5	5	P1P2	0.836909	-0.111997	3	3
2018-03-09	P1P2	0.776732	0.0240806	2	2	P1P2	0.746873	-0.0185478	3	3	P1P2	0.25725	0.0713112	1	1	P1P2	0.487412	0.0695803	3	3	P1P2	0.45602	0.058491	4	4	P1P2	0.140416	0.120758	1	1	P1P2	0.408287	0.641337	3	3	P1P2	0.337962	0.451944	4	4	P1P2	0.0899721	1.79097	1	1
pseudo_18411	pseudo_transcript_1	0.812658	0.0171191	7	7	pseudo_transcript_0	0.0777807	-0.0802502	5	5	pseudo_transcript_1	0.222823	-0.0403323	4	4	pseudo_transcript_1	0.0749898	0.10144	5	5	pseudo_transcript_0	0.0401947	0.225313	7	7	pseudo_transcript_0	0.031257	0.120693	4	4	pseudo_transcript_0	0.456786	1.20272	7	7	pseudo_transcript_0	0.425945	0.507261	5	5	pseudo_transcript_1	0.957422	-0.00110394	5	5
pseudo_10438	pseudo_transcript_0	0.738593	0.0250636	3	3	pseudo_transcript_0	0.653857	-0.00319073	6	6	pseudo_transcript_0	0.272609	-0.0410998	2	2	pseudo_transcript_0	0.200577	0.0925886	2	2	pseudo_transcript_0	0.511637	0.0829905	6	6	pseudo_transcript_0	0.140815	0.120686	1	1	pseudo_transcript_0	0.41385	0.310676	3	3	pseudo_transcript_0	0.434024	0.582092	4	4	pseudo_transcript_0	0.140251	0.775814	2	2
HSD17B3	P1P2	0.754588	-0.0180327	5	5	P1P2	0.206237	-0.109722	2	2	P1P2	0.200799	-0.053836	2	2	P1P2	0.180705	0.0866695	4	4	P1P2	0.188189	0.0980762	7	7	P1P2	0.0762328	0.12063	2	2	P1P2	0.88519	0.251289	7	7	P1P2	0.402025	0.461155	2	2	P1P2	0.218249	0.52332	2	2
TTC27	P1P2	0.118093	0.169008	1	1	P1P2	0.975451	-0.00268541	1	1						P1P2	0.472152	0.0574926	1	1	P1P2	0.363535	0.0829078	2	2	P1P2	0.141215	0.120575	1	1	P1P2	0.104074	2.028	1	1	P1P2	0.90759	0.0784765	1	1
pseudo_18787	pseudo_transcript_0	0.928075	0.0576019	8	8	pseudo_transcript_0	0.811549	-0.0372156	3	3	pseudo_transcript_0	0.495656	0.041796	2	2	pseudo_transcript_0	0.343895	0.127425	8	8	pseudo_transcript_0	0.0353611	0.127708	7	7	pseudo_transcript_0	0.0653624	0.120466	6	6	pseudo_transcript_0	0.144367	1.29121	6	6	pseudo_transcript_0	0.587982	0.248006	3	3	pseudo_transcript_0	0.0630303	0.935937	2	2
C14orf164	P1P2	0.618725	0.121934	7	7	P1P2	0.133606	-0.0783941	7	7	P1P2	0.660035	-0.0230185	6	6	P1P2	0.0256492	0.238118	6	6	P1P2	0.849863	0.0347112	6	6	P1P2	0.118665	0.120442	4	4	P1P2	0.00342738	1.77155	5	5	P1P2	0.4854	-0.45039	4	4	P1P2	0.117814	0.797164	4	4
DDX6	P1P2	0.180999	-0.0705146	2	2	P1P2	0.340569	-0.103336	4	4	P1P2	0.0992428	-0.143966	1	1	P1P2	0.120337	0.0848464	3	3	P1P2	0.168454	0.0875762	6	6	P1P2	0.0144731	0.120365	3	3	P1P2	0.381462	0.209286	5	5	P1P2	0.281799	-0.548784	5	5	P1P2	0.999192	-0.0945742	4	4
pseudo_2829	pseudo_transcript_0	0.680155	0.0103981	4	4	pseudo_transcript_0	0.175585	-0.0764185	3	3	pseudo_transcript_0	0.680241	-0.0135108	1	1	pseudo_transcript_0	0.761838	-0.0052842	5	5	pseudo_transcript_0	0.130618	0.159218	4	4	pseudo_transcript_0	0.0431538	0.120364	2	2	pseudo_transcript_0	0.411096	-0.501758	4	4	pseudo_transcript_0	0.674548	0.353341	5	5	pseudo_transcript_0	0.815275	0.20777	2	2
ZNF488	P1	0.443389	0.0578173	1	1	P1	0.664506	-0.0204194	4	4	P2	0.372781	0.0148287	5	5	P2	0.212619	0.0518988	8	8	P2	0.886818	0.0781828	7	7	P2	0.336954	0.120323	7	7	P1	0.37435	0.478492	2	2	P1	0.670298	0.222454	5	5	P1	0.304773	0.589164	1	1
TRIM47	P1P2	0.218952	0.0684789	2	2	P1P2	0.112756	-0.0772403	3	3	P1P2	0.97393	0.00523314	1	1	P1P2	0.0507708	0.188386	7	7	P1P2	0.395829	0.1654	7	7	P1P2	0.0765946	0.120305	5	5	P1P2	0.0456867	1.04348	3	3	P1P2	0.441589	0.615581	1	1
DLX5	P1P2	0.797833	-0.0818772	7	7	P1P2	0.287882	0.0468915	3	3	P1P2	0.726535	0.0181639	3	3	P1P2	0.669697	0.101367	7	7	P1P2	0.0840918	0.165034	4	4	P1P2	0.0357286	0.120297	3	3	P1P2	0.88481	0.17224	8	8	P1P2	0.093554	1.05488	2	2	P1P2	0.137953	0.650029	2	2
NOXA1	P1P2	0.175288	-0.123982	8	8	P1P2	0.725324	0.0303481	4	4	P1P2	0.248529	-0.047486	3	3	P1P2	0.00607769	0.138516	7	7	P1P2	0.56722	0.051172	5	5	P1P2	0.0233459	0.120223	4	4	P1P2	0.269266	0.681783	7	7	P1P2	0.0134589	1.40221	4	4	P1P2	0.916007	0.0930802	1	1
MEF2A	P1P2	0.58536	0.0412411	9	9	P1P2	0.94513	-0.0349041	7	7	P1P2	0.799128	-0.0307271	7	7	P1P2	0.287773	0.0709844	8	8	P1P2	0.45571	0.169381	7	7	P1P2	0.146265	0.120182	6	6	P1P2	0.588876	0.86919	8	8	P1P2	0.457038	0.725678	5	5	P1P2	0.225615	0.679803	4	4
pseudo_9873	pseudo_transcript_0	0.0610981	-0.228949	4	4	pseudo_transcript_0	0.991905	0.00185059	3	3	pseudo_transcript_0	0.0889079	-0.181444	1	1	pseudo_transcript_0	0.00892963	0.230707	6	6	pseudo_transcript_0	0.302032	-0.0828793	3	3	pseudo_transcript_0	0.0481389	0.120154	2	2	pseudo_transcript_0	0.690051	-0.280003	4	4	pseudo_transcript_0	0.706816	-0.266626	2	2	pseudo_transcript_0	0.486642	-0.384206	1	1
pseudo_14054	pseudo_transcript_0	0.475085	-0.0365208	2	2	pseudo_transcript_0	0.311817	-0.0469456	3	3	pseudo_transcript_0	0.41082	-0.0375148	1	1	pseudo_transcript_0	0.266058	0.0623045	2	2	pseudo_transcript_0	0.502927	-0.0438216	6	6	pseudo_transcript_0	0.141616	0.120148	1	1	pseudo_transcript_0	0.500035	0.324181	5	5	pseudo_transcript_0	0.60002	-0.234738	4	4	pseudo_transcript_0	0.9301	-0.172093	3	3
pseudo_16382	pseudo_transcript_0	0.631665	0.0167555	4	4	pseudo_transcript_0	0.0990839	-0.124891	2	2	pseudo_transcript_0	0.132296	-0.0581424	2	2	pseudo_transcript_0	0.25417	-0.0542482	4	4	pseudo_transcript_0	0.00482889	0.19722	4	4	pseudo_transcript_0	0.141616	0.120148	1	1	pseudo_transcript_0	0.412799	-0.406729	4	4	pseudo_transcript_0	0.86556	-0.034449	3	3	pseudo_transcript_0	0.932608	-0.0956398	2	2
pseudo_18792	pseudo_transcript_0	0.935637	0.0195949	6	6	pseudo_transcript_0	0.543003	-0.0343471	4	4	pseudo_transcript_0	0.371012	-0.0249337	4	4	pseudo_transcript_0	0.465474	-0.0893563	5	5	pseudo_transcript_0	0.101428	0.113993	3	3	pseudo_transcript_0	0.141616	0.120148	1	1	pseudo_transcript_0	0.44731	-0.48818	5	5	pseudo_transcript_0	0.947078	-0.0755877	2	2	pseudo_transcript_0	0.245179	0.71293	1	1
pseudo_5419	pseudo_transcript_0	0.27376	0.0733461	6	6	pseudo_transcript_0	0.849719	0.0067391	5	5	pseudo_transcript_0	0.406331	0.0348135	3	3	pseudo_transcript_0	0.928068	-0.07614	5	5	pseudo_transcript_0	0.989333	-0.00290207	3	3	pseudo_transcript_0	0.141616	0.120148	1	1	pseudo_transcript_0	0.303578	0.506927	5	5	pseudo_transcript_0	0.824175	-0.554972	2	2	pseudo_transcript_0	0.245179	0.71293	1	1
pseudo_764	pseudo_transcript_0	0.155143	-0.0653565	3	3	pseudo_transcript_0	0.1208	-0.104534	2	2	pseudo_transcript_1	0.134286	0.075244	2	2	pseudo_transcript_0	0.294899	0.0377423	4	4	pseudo_transcript_1	0.534342	0.0440522	3	3	pseudo_transcript_0	0.141616	0.120148	1	1	pseudo_transcript_1	0.630669	-0.371461	5	5	pseudo_transcript_0	0.189052	1.16372	1	1	pseudo_transcript_0	0.245179	0.71293	1	1
THADA	P1P2	0.373308	-0.0456894	3	3	P1P2	0.653533	-0.0511473	6	6	P1P2	0.181507	-0.0375248	3	3	P1P2	0.137765	0.132947	4	4	P1P2	0.127834	0.0889746	5	5	P1P2	0.00467588	0.120073	4	4	P1P2	0.677167	0.149915	3	3	P1P2	0.22153	0.303884	5	5	P1P2	0.0687761	0.627919	3	3
KDELC2	P1P2	0.45271	0.0257423	4	4	P1P2	0.771359	-0.0801062	5	5	P1P2	0.439655	-0.0295078	3	3	P1P2	0.609581	0.0335288	3	3	P1P2	0.0233172	0.1746	4	4	P1P2	0.0849413	0.120045	2	2	P1P2	0.818902	0.144644	2	2	P1P2	0.4993	0.355683	5	5	P1P2	0.424234	0.452292	1	1
OTOR	P1P2	0.0693716	-0.124012	5	5	P1P2	0.698896	0.00972045	3	3	P1P2	0.471626	-0.0221909	2	2	P1P2	0.111261	0.0703077	7	7	P1P2	0.545744	0.14277	6	6	P1P2	0.221603	0.119926	6	6	P1P2	0.972655	-0.559096	5	5	P1P2	0.947805	0.0110424	3	3	P1P2	0.458687	0.302664	2	2
LPCAT1	P2	0.0741382	-0.117425	4	4	P1	0.116103	-0.0879247	3	3	P2	0.0970294	-0.147696	1	1	P1	0.468617	0.075467	4	4	P2	0.0362229	0.233143	2	2	P2	0.0538593	0.119915	2	2	P2	0.496772	-0.536194	4	4	P2	0.127014	1.51715	1	1	P2	0.823459	0.138952	1	1
WDR19	P1P2	0.247116	0.0537613	3	3	P1P2	0.156903	-0.125998	6	6	P1P2	0.760354	-0.00922755	1	1	P1P2	0.158162	-0.0977281	2	2	P1P2	0.838213	0.0429773	4	4	P1P2	0.142018	0.119881	1	1	P1P2	0.488609	-0.217571	4	4	P1P2	0.232425	-0.76872	3	3	P1P2	0.0864141	-0.654889	3	3
pseudo_10029	pseudo_transcript_0	0.0535448	-0.104095	3	3	pseudo_transcript_0	0.945992	0.00219496	5	5	pseudo_transcript_0	0.151053	-0.0662389	2	2	pseudo_transcript_0	0.0274609	0.124725	5	5	pseudo_transcript_0	0.0666044	0.157358	2	2	pseudo_transcript_0	0.142421	0.119874	1	1	pseudo_transcript_0	0.440628	-0.347418	3	3	pseudo_transcript_0	0.108893	1.26184	2	2	pseudo_transcript_0	0.86951	-0.0469316	1	1
pseudo_11220	pseudo_transcript_0	0.0900466	-0.116014	2	2	pseudo_transcript_0	0.968032	-0.000222183	4	4	pseudo_transcript_0	0.275988	-0.0536689	2	2	pseudo_transcript_0	0.605022	0.0442201	2	2	pseudo_transcript_0	0.523773	0.0469054	4	4	pseudo_transcript_0	0.142421	0.119874	1	1	pseudo_transcript_0	0.985948	-0.00242014	2	2	pseudo_transcript_0	0.690043	0.165827	3	3	pseudo_transcript_0	0.693467	0.181584	2	2
pseudo_12357	pseudo_transcript_0	0.524239	-0.0613198	2	2	pseudo_transcript_0	0.177734	-0.0726491	4	4	pseudo_transcript_0	0.248692	-0.0561976	2	2	pseudo_transcript_0	0.189757	0.0739928	3	3	pseudo_transcript_0	0.555777	-0.0517133	5	5	pseudo_transcript_0	0.142421	0.119874	1	1	pseudo_transcript_0	0.304381	-0.51629	4	4	pseudo_transcript_0	0.794016	-0.537306	3	3	pseudo_transcript_0	0.946291	0.0565032	2	2
pseudo_13250	pseudo_transcript_0	0.278988	-0.0631058	4	4	pseudo_transcript_0	0.451165	-0.0519157	6	6	pseudo_transcript_0	0.392718	-0.0306125	4	4	pseudo_transcript_0	0.121069	0.0998109	2	2	pseudo_transcript_0	0.169742	0.153368	6	6	pseudo_transcript_0	0.142421	0.119874	1	1	pseudo_transcript_0	0.0906033	-0.742632	4	4	pseudo_transcript_0	0.947456	-0.123118	6	6	pseudo_transcript_0	0.17975	-0.473237	3	3
pseudo_16377	pseudo_transcript_0	0.555336	-0.0606924	4	4	pseudo_transcript_0	0.786291	-0.0160026	2	2	pseudo_transcript_0	0.433045	-0.0418647	2	2	pseudo_transcript_0	0.151019	0.0998541	4	4	pseudo_transcript_0	0.464116	-0.0516946	3	3	pseudo_transcript_0	0.142421	0.119874	1	1	pseudo_transcript_0	0.352778	-0.458351	2	2	pseudo_transcript_0	0.789198	-0.220441	2	2	pseudo_transcript_0	0.86951	-0.0469316	1	1
pseudo_2100	pseudo_transcript_0	0.756278	-0.0236217	5	5	pseudo_transcript_0	0.771919	-0.00911477	4	4	pseudo_transcript_0	0.596946	-0.0209583	3	3	pseudo_transcript_0	0.990447	0.0105014	3	3	pseudo_transcript_0	0.54496	0.0442379	2	2	pseudo_transcript_0	0.142421	0.119874	1	1	pseudo_transcript_0	0.177505	-0.822247	3	3	pseudo_transcript_0	0.727552	-0.206075	3	3	pseudo_transcript_0	0.237021	-0.596955	2	2
pseudo_411	pseudo_transcript_0	0.0420787	-0.114152	3	3	pseudo_transcript_0	0.488697	-0.0511605	1	1	pseudo_transcript_0	0.125887	-0.113164	1	1	pseudo_transcript_0	0.783717	0.022272	4	4	pseudo_transcript_0	0.815226	0.0154486	3	3	pseudo_transcript_0	0.142421	0.119874	1	1	pseudo_transcript_0	0.23477	-0.611924	5	5	pseudo_transcript_0	0.577583	0.436651	1	1	pseudo_transcript_0	0.86951	-0.0469316	1	1
pseudo_8747	pseudo_transcript_0	0.139295	-0.104673	2	2	pseudo_transcript_0	0.88388	-0.0101181	2	2	pseudo_transcript_0	0.125887	-0.113164	1	1	pseudo_transcript_0	0.61934	0.0423156	2	2	pseudo_transcript_0	0.260167	0.0761121	4	4	pseudo_transcript_0	0.142421	0.119874	1	1	pseudo_transcript_0	0.359041	-0.394045	3	3	pseudo_transcript_0	0.463612	0.403531	2	2	pseudo_transcript_0	0.86951	-0.0469316	1	1
PEBP4	P1P2	0.596128	-0.0251915	6	6	P1P2	0.47561	-0.0551123	3	3	P1P2	0.0512868	-0.0892251	2	2	P1P2	0.448648	0.065728	5	5	P1P2	0.173305	0.0979443	4	4	P1P2	0.0384157	0.119822	2	2	P1P2	0.955533	-0.0685589	4	4	P1P2	0.886912	-0.115771	3	3	P1P2	0.798299	0.158859	1	1
SSUH2	P1P2	0.607233	-0.0254712	5	5	P1P2	0.892138	0.0103876	4	4	P1P2	0.498908	-0.0711587	2	2	P1P2	0.352276	0.0652072	6	6	P1P2	0.0348709	0.184347	4	4	P1P2	0.0244509	0.119802	4	4	P1P2	0.447576	0.170248	5	5	P1P2	0.20211	1.11347	1	1	P1P2	0.767145	-0.127875	1	1
pseudo_12985	pseudo_transcript_0	0.328808	-0.072967	1	1	pseudo_transcript_0	0.772973	-0.0580072	6	6	pseudo_transcript_0	0.237232	-0.0697304	1	1	pseudo_transcript_0	0.347148	0.0863756	3	3	pseudo_transcript_0	0.788791	-0.0237446	6	6	pseudo_transcript_0	0.143229	0.119797	1	1	pseudo_transcript_0	0.844179	-0.0963952	2	2	pseudo_transcript_0	0.953093	-0.237812	5	5	pseudo_transcript_0	0.943409	0.074978	1	1
pseudo_18626	pseudo_transcript_0	0.121647	0.164669	1	1	pseudo_transcript_0	0.583899	-0.0772887	2	2						pseudo_transcript_0	0.264254	0.11304	4	4	pseudo_transcript_0	0.766808	-0.0265465	1	1	pseudo_transcript_0	0.143229	0.119797	1	1	pseudo_transcript_0	0.512854	0.387902	3	3	pseudo_transcript_0	0.604605	0.406984	1	1
pseudo_18866	pseudo_transcript_0	0.305694	-0.0760747	1	1	pseudo_transcript_0	0.515337	0.0143323	4	4	pseudo_transcript_0	0.142876	-0.0999221	1	1	pseudo_transcript_0	0.0169279	0.242693	2	2	pseudo_transcript_0	0.79076	-0.0159314	2	2	pseudo_transcript_0	0.143229	0.119797	1	1	pseudo_transcript_0	0.499877	0.424547	1	1	pseudo_transcript_0	0.454955	-0.474969	3	3
pseudo_687	pseudo_transcript_0	0.468032	-0.0384222	5	5	pseudo_transcript_0	0.619532	-0.0484749	3	3	pseudo_transcript_0	0.0406983	-0.1074	2	2	pseudo_transcript_0	0.283793	0.0943197	3	3	pseudo_transcript_0	0.904184	0.00982527	4	4	pseudo_transcript_0	0.143229	0.119797	1	1	pseudo_transcript_0	0.924231	-0.074637	2	2	pseudo_transcript_0	0.765875	0.16365	2	2
NFKBIZ	P1	0.139158	-0.0832954	4	4	P1	0.364341	0.0136728	6	6	P2	0.590986	-0.0209334	1	1	P1	0.160435	0.14073	7	7	P2	0.403323	0.051925	4	4	P1	0.149072	0.11972	7	7	P1	0.599069	-0.348093	4	4	P1	0.0106592	1.66667	6	6	P1	0.202594	0.511459	2	2
pseudo_13348	pseudo_transcript_0	0.0255142	-0.121076	5	5	pseudo_transcript_0	0.566481	-0.0564988	3	3	pseudo_transcript_0	0.0895916	-0.176289	1	1	pseudo_transcript_0	0.0394113	0.101737	3	3	pseudo_transcript_0	0.113397	0.164601	6	6	pseudo_transcript_0	0.14404	0.119662	1	1	pseudo_transcript_0	0.54993	0.331385	5	5	pseudo_transcript_0	0.229938	-1.06237	4	4	pseudo_transcript_0	0.521659	-0.611266	4	4
pseudo_2807	pseudo_transcript_0	0.307239	-0.0684548	2	2	pseudo_transcript_0	0.09591	-0.211285	1	1	pseudo_transcript_0	0.0895916	-0.176289	1	1	pseudo_transcript_0	0.724343	0.0236788	2	2	pseudo_transcript_0	0.267852	0.0709664	3	3	pseudo_transcript_0	0.14404	0.119662	1	1	pseudo_transcript_0	0.357656	-0.651883	1	1	pseudo_transcript_0	0.40608	-0.763414	1	1	pseudo_transcript_0	0.269008	-0.707649	1	1
CENPV	P1P2	0.483163	0.0339862	6	6	P1P2	0.251297	-0.0775083	7	7	P1P2	0.225587	-0.0424861	4	4	P1P2	0.124028	0.0548541	7	7	P1P2	0.828601	0.0526934	6	6	P1P2	0.116427	0.119642	6	6	P1P2	0.185523	0.73433	5	5	P1P2	0.53317	0.521266	5	5	P1P2	0.462641	0.351834	3	3
pseudo_2989	pseudo_transcript_0	0.40543	0.0289602	4	4	pseudo_transcript_0	0.553244	-0.0638158	4	4	pseudo_transcript_0	0.74627	-0.0174278	3	3	pseudo_transcript_0	0.29324	0.0569773	4	4	pseudo_transcript_0	0.0652661	0.181232	6	6	pseudo_transcript_0	0.0914761	0.119584	4	4	pseudo_transcript_0	0.955929	0.581519	4	4	pseudo_transcript_0	0.0183369	1.06355	5	5	pseudo_transcript_0	0.0969841	0.881414	3	3
pseudo_17254	pseudo_transcript_0	0.612528	0.0339599	5	5	pseudo_transcript_1	0.452041	-0.0838315	2	2	pseudo_transcript_0	0.244506	-0.0399929	2	2	pseudo_transcript_1	0.587717	0.003988	6	6	pseudo_transcript_1	0.00830243	0.235138	4	4	pseudo_transcript_1	0.0123143	0.119563	4	4	pseudo_transcript_0	0.473336	0.447721	6	6	pseudo_transcript_1	0.113041	1.6864	1	1	pseudo_transcript_0	0.138066	0.610181	4	4
pseudo_11648	pseudo_transcript_0	0.489216	0.0305043	3	3	pseudo_transcript_0	0.390866	-0.00700377	5	5	pseudo_transcript_0	0.778192	0.0207194	3	3	pseudo_transcript_0	0.0478827	0.165919	5	5	pseudo_transcript_0	0.324438	0.0138671	6	6	pseudo_transcript_0	0.00728477	0.119559	4	4	pseudo_transcript_0	0.0926458	0.992447	2	2	pseudo_transcript_0	0.399699	0.203493	5	5	pseudo_transcript_0	0.0614222	0.87858	2	2
pseudo_10009	pseudo_transcript_0	0.903441	-0.0582796	7	7	pseudo_transcript_0	0.487915	-0.00606848	7	7	pseudo_transcript_0	0.401688	-0.0512833	5	5	pseudo_transcript_0	0.855938	0.0793209	9	9	pseudo_transcript_0	0.845056	0.0737078	9	9	pseudo_transcript_0	0.349578	0.119536	8	8	pseudo_transcript_0	0.454252	0.140056	6	6	pseudo_transcript_0	0.282509	0.461311	7	7	pseudo_transcript_0	0.851413	0.403913	5	5
INS-IGF2	P1	0.460978	0.059244	8	8	P2	0.633913	-0.0342937	2	2	P1	0.341381	0.0606287	6	6	P2	0.499899	0.0284457	3	3	P1	0.0147205	0.236618	9	9	P1	0.0475776	0.119526	9	9	P2	0.340959	0.73189	3	3	P1	0.0617535	1.23969	7	7	P1	0.105099	0.599383	6	6
pseudo_15393	pseudo_transcript_0	0.949621	-0.00651757	3	3	pseudo_transcript_0	0.298492	-0.0859237	1	1	pseudo_transcript_0	0.155145	-0.0953362	1	1	pseudo_transcript_0	0.49905	-0.0416431	2	2	pseudo_transcript_0	0.695626	0.0794875	5	5	pseudo_transcript_0	0.144855	0.119465	1	1	pseudo_transcript_0	0.135643	-0.708898	5	5	pseudo_transcript_0	0.50932	0.343956	3	3	pseudo_transcript_0	0.914395	0.0682964	2	2
pseudo_846	pseudo_transcript_0	0.0905946	-0.0917968	4	4	pseudo_transcript_0	0.102767	-0.0798104	3	3	pseudo_transcript_0	0.0423188	-0.0792517	3	3	pseudo_transcript_0	0.952263	-0.00151082	3	3	pseudo_transcript_0	0.234109	0.0901218	3	3	pseudo_transcript_0	0.144855	0.119465	1	1	pseudo_transcript_0	0.976604	0.0385501	3	3	pseudo_transcript_0	0.510286	-0.587742	3	3	pseudo_transcript_0	0.768694	0.17208	1	1
PCDH8	P1P2	0.757308	-0.013515	3	3	P1P2	0.483463	0.0320041	2	2						P1P2	0.927338	0.00676603	2	2	P1P2	0.476701	0.0088164	4	4	P1P2	0.145264	0.119419	1	1	P1P2	0.799365	0.0869074	3	3	P1P2	0.592826	-0.443726	1	1	P1P2	0.829779	-0.0704257	1	1
TALDO1	P1P2	0.854833	0.0113104	2	2	P1P2	0.334482	-0.05607	3	3	P1P2	0.227996	-0.0713538	1	1	P1P2	0.167154	0.0708505	4	4	P1P2	0.480556	0.140421	6	6	P1P2	0.0496582	0.119418	4	4	P1P2	0.119753	0.700477	4	4	P1P2	0.817898	0.0153295	3	3	P1P2	0.324286	0.566718	1	1
pseudo_15321	pseudo_transcript_0	0.367524	-0.0275679	9	9	pseudo_transcript_0	0.107598	0.0811753	5	5	pseudo_transcript_0	0.365438	0.0277251	5	5	pseudo_transcript_0	0.187019	0.0989452	9	9	pseudo_transcript_0	0.92626	0.0269557	8	8	pseudo_transcript_0	0.138973	0.11939	8	8	pseudo_transcript_0	0.382218	0.604858	8	8	pseudo_transcript_0	0.414015	0.583762	4	4	pseudo_transcript_0	0.0888137	0.992606	4	4
COMMD1	P1P2	0.876351	0.105072	8	8	P1P2	0.284335	-0.0846318	6	6	P1P2	0.801677	-0.00818168	5	5	P1P2	0.151379	0.134978	9	9	P1P2	0.0304774	0.191717	6	6	P1P2	0.0103634	0.119368	6	6	P1P2	0.0309832	1.52371	8	8	P1P2	0.167694	0.914619	4	4	P1P2	0.264511	0.367354	3	3
CPA2	P1P2	0.39954	-0.040892	6	6	P1P2	0.674794	0.0229361	7	7	P1P2	0.223512	-0.0483535	4	4	P1P2	0.342568	0.079705	5	5	P1P2	0.0368192	0.223585	7	7	P1P2	0.0522946	0.119347	4	4	P1P2	0.898812	0.176669	6	6	P1P2	0.34574	0.971409	7	7	P1P2	0.427953	0.642706	5	5
pseudo_14331	pseudo_transcript_0	0.439061	-0.0240093	4	4	pseudo_transcript_0	0.329184	-0.0983729	2	2	pseudo_transcript_0	0.384488	0.0551051	1	1	pseudo_transcript_0	0.0935949	-0.0869051	3	3	pseudo_transcript_0	0.484189	-0.0625641	4	4	pseudo_transcript_1	0.0927982	0.119319	2	2	pseudo_transcript_0	0.0586586	-0.890169	3	3	pseudo_transcript_0	0.0228906	-2.27508	2	2	pseudo_transcript_0	0.121745	-1.22642	1	1
SET	P1P2	0.536818	-0.0208864	4	4	P1P2	0.790476	0.012782	2	2						P1P2	0.177931	0.074333	4	4	P1P2	0.295566	0.121904	3	3	P1P2	0.0488282	0.119295	3	3	P1P2	0.41053	0.367505	4	4	P1P2	0.364003	0.726356	1	1
pseudo_1735	pseudo_transcript_0	0.130894	-0.145733	9	9	pseudo_transcript_0	0.390053	-0.0587541	5	5	pseudo_transcript_0	0.215392	-0.0244132	5	5	pseudo_transcript_0	0.0603134	0.149119	9	9	pseudo_transcript_0	0.325248	0.116622	7	7	pseudo_transcript_0	0.0393939	0.119279	7	7	pseudo_transcript_0	0.89558	0.567186	9	9	pseudo_transcript_0	0.576115	-0.483091	3	3	pseudo_transcript_0	0.502745	-0.274559	3	3
PPTC7	P1P2	0.70084	-0.0166356	5	5	P1P2	0.619595	0.0247779	2	2	P1P2	0.728045	-0.0066099	2	2	P1P2	0.332177	0.0824575	8	8	P1P2	0.0446774	0.140775	7	7	P1P2	0.092996	0.119241	6	6	P1P2	0.446246	0.34716	5	5	P1P2	0.879097	0.0675111	2	2	P1P2	0.608872	-0.185287	2	2
PLK2	P2	0.468652	0.0545729	1	1	P2	0.270802	0.0783989	1	1	P1	0.23081	0.0758008	1	1	P1	0.0220723	0.121296	4	4	P2	0.0743352	-0.15126	2	2	P1	0.0188813	0.119237	3	3	P1	0.352226	0.561738	7	7	P2	0.10234	-1.30984	2	2	P2	0.133397	-1.14602	1	1
RUSC1	P1	0.515562	-0.0285657	3	3	P1	0.218386	-0.0518331	4	4	P1	0.0694276	-0.0800552	2	2	P1	0.113594	0.134536	5	5	P1	0.145495	0.172191	5	5	P1	0.0272655	0.119231	3	3	P2	0.00667026	-1.30902	5	5	P1	0.162537	0.987071	4	4	P2	0.355048	-0.575716	1	1
SMG5	P1P2	0.0272126	-0.124184	4	4	P1P2	0.437127	-0.0482072	5	5	P1P2	0.162117	-0.0913641	1	1	P1P2	0.0149905	0.199195	5	5	P1P2	0.224016	0.0699565	8	8	P1P2	0.00307493	0.119227	5	5	P1P2	0.82004	0.419093	7	7	P1P2	0.420214	-0.146254	5	5	P1P2	0.813233	-0.0742346	3	3
pseudo_10175	pseudo_transcript_0	0.540035	-0.080372	6	6	pseudo_transcript_0	0.326132	0.05425	6	6	pseudo_transcript_0	0.733943	0.00215063	4	4	pseudo_transcript_0	0.178603	0.190713	6	6	pseudo_transcript_0	0.470042	0.125929	6	6	pseudo_transcript_0	0.10913	0.119218	5	5	pseudo_transcript_0	0.148337	1.34913	7	7	pseudo_transcript_0	0.138281	0.70948	5	5	pseudo_transcript_0	0.0371291	0.959362	4	4
pseudo_2629	pseudo_transcript_0	0.384434	-0.0422782	4	4	pseudo_transcript_0	0.852107	-0.0171413	3	3	pseudo_transcript_0	0.170452	-0.0879922	1	1	pseudo_transcript_0	0.222078	0.0676153	9	9	pseudo_transcript_0	0.308621	0.0912451	4	4	pseudo_transcript_0	0.0522946	0.119143	4	4	pseudo_transcript_0	0.712563	0.206571	4	4	pseudo_transcript_0	0.502715	0.388897	2	2	pseudo_transcript_0	0.828198	0.130764	1	1
SOS1	P1P2	0.39306	0.0660791	1	1	P1P2	0.758354	-0.0194458	2	2	P1P2	0.483422	0.0439241	1	1	P1P2	0.679749	0.0191127	3	3	P1P2	0.0334058	0.201047	2	2	P1P2	0.145264	0.11913	1	1	P1P2	0.73094	0.116973	3	3	P1P2	0.11817	1.6118	1	1	P1P2	0.159266	0.988235	1	1
pseudo_8351	pseudo_transcript_0	0.998226	-0.0963219	5	5	pseudo_transcript_0	0.527821	-0.00127339	4	4	pseudo_transcript_0	0.0240066	-0.142731	2	2	pseudo_transcript_0	0.52866	0.137123	6	6	pseudo_transcript_0	0.747971	0.0156516	4	4	pseudo_transcript_0	0.0138341	0.119047	3	3	pseudo_transcript_0	0.781544	0.396358	4	4	pseudo_transcript_0	0.537388	-0.163095	5	5	pseudo_transcript_0	0.439462	-0.228887	3	3
pseudo_6894	pseudo_transcript_0	0.529804	0.0515634	5	5	pseudo_transcript_0	0.935234	-0.101079	7	7	pseudo_transcript_0	0.604632	-0.0419359	5	5	pseudo_transcript_0	0.727329	-0.0201727	6	6	pseudo_transcript_0	0.360221	0.11833	5	5	pseudo_transcript_0	0.0170968	0.119004	3	3	pseudo_transcript_0	0.351558	0.243111	6	6	pseudo_transcript_0	0.565009	0.678856	5	5	pseudo_transcript_0	0.330639	0.403666	4	4
ZNF667	P1P2	0.180184	0.107229	4	4	P1P2	0.404978	-0.0583457	6	6	P1P2	0.724963	0.0221278	3	3	P1P2	0.0975258	0.0570588	6	6	P1P2	0.0494036	0.129462	6	6	P1P2	0.0734917	0.118983	4	4	P1P2	0.07391	1.83262	6	6	P1P2	0.532177	0.537305	4	4	P1P2	0.215927	0.798749	3	3
SRSF6	P1	0.302475	-0.0430847	6	6	P1	0.805388	0.0156049	6	6	P1	0.196516	-0.0378452	5	5	P2	0.169515	-0.0807996	9	9	P2	0.856976	-0.0567353	6	6	P1	0.0366509	0.11886	5	5	P2	0.807731	0.221085	6	6	P1	0.32213	0.361563	5	5	P2	0.649575	-0.222222	2	2
pseudo_1884	pseudo_transcript_0	0.73128	0.0248355	1	1	pseudo_transcript_0	0.361331	-0.0639498	2	2						pseudo_transcript_0	0.647494	0.0891508	2	2	pseudo_transcript_0	0.066799	0.14856	2	2	pseudo_transcript_0	0.157121	0.118856	2	2	pseudo_transcript_0	0.846385	0.112984	2	2	pseudo_transcript_0	0.101391	1.83671	1	1
PCBD1	P1P2	0.752926	0.020694	4	4	P1P2	0.55517	-0.0361498	5	5	P1P2	0.783819	0.0150636	3	3	P1P2	0.811427	-0.0240962	5	5	P1P2	0.101521	0.247852	1	1	P1P2	0.145264	0.118848	1	1	P1P2	0.257788	0.59541	4	4	P1P2	0.0641436	1.15765	2	2	P1P2	0.130277	1.21791	1	1
OR5M1	ENST00000526538.1	0.496006	-0.0423616	4	4	ENST00000526538.1	0.034993	-0.135514	3	3						ENST00000526538.1	0.198366	0.169003	6	6	ENST00000526538.1	0.0748912	0.175763	4	4	ENST00000526538.1	0.130108	0.118839	3	3	ENST00000526538.1	0.185898	0.842496	4	4	ENST00000526538.1	0.967749	0.026702	1	1
PPM1N	P1P2	0.588817	-0.0588536	4	4	P1P2	0.467837	0.0592387	5	5	P1P2	0.426141	-0.0310179	3	3	P1P2	0.348752	0.102529	4	4	P1P2	0.0676806	0.148186	2	2	P1P2	0.115487	0.118834	2	2	P1P2	0.657697	0.187983	4	4	P1P2	0.195226	0.784438	2	2	P1P2	0.116542	0.676089	2	2
pseudo_4414	pseudo_transcript_0	0.105518	-0.0884159	4	4	pseudo_transcript_0	0.128082	-0.129868	5	5	pseudo_transcript_0	0.369769	-0.0335997	2	2	pseudo_transcript_0	0.185321	0.106965	2	2	pseudo_transcript_0	0.0300545	0.195392	5	5	pseudo_transcript_0	0.131281	0.118828	2	2	pseudo_transcript_0	0.634412	0.245983	2	2	pseudo_transcript_0	0.327558	0.554958	4	4	pseudo_transcript_0	0.636526	0.271764	1	1
pseudo_11776	pseudo_transcript_0	0.16892	-0.0783989	2	2	pseudo_transcript_0	0.711536	-0.018285	2	2	pseudo_transcript_0	0.59727	-0.0205984	1	1	pseudo_transcript_0	0.17172	0.127403	1	1	pseudo_transcript_0	0.39726	0.0489686	3	3	pseudo_transcript_0	0.145674	0.118823	1	1	pseudo_transcript_0	0.47404	0.298283	4	4	pseudo_transcript_0	0.249924	0.679824	2	2	pseudo_transcript_0	0.250941	0.518505	2	2
pseudo_5924	pseudo_transcript_0	0.445263	-0.0590355	4	4	pseudo_transcript_0	0.216498	-0.0602623	3	3	pseudo_transcript_0	0.413727	-0.0232497	2	2	pseudo_transcript_0	0.735003	0.0289789	4	4	pseudo_transcript_0	0.0876556	0.132962	2	2	pseudo_transcript_0	0.145674	0.118823	1	1	pseudo_transcript_0	0.876167	-0.0690404	4	4	pseudo_transcript_0	0.213883	1.07125	1	1	pseudo_transcript_0	0.189445	0.852111	1	1
pseudo_6540	pseudo_transcript_0	0.277692	0.113356	6	6	pseudo_transcript_1	0.073805	-0.172265	6	6	pseudo_transcript_1	0.241956	-0.0536297	4	4	pseudo_transcript_0	0.247495	0.142129	7	7	pseudo_transcript_1	0.0552723	0.185855	6	6	pseudo_transcript_1	0.0259945	0.118819	4	4	pseudo_transcript_0	0.253109	1.30831	6	6	pseudo_transcript_0	0.359399	-0.486013	4	4	pseudo_transcript_0	0.808698	-0.0086749	3	3
pseudo_4405	pseudo_transcript_0	0.892472	-0.000607078	5	5	pseudo_transcript_0	0.375393	-0.0526787	2	2	pseudo_transcript_0	0.430039	-0.0255249	2	2	pseudo_transcript_0	0.510298	0.091975	6	6	pseudo_transcript_0	0.602949	0.0352479	2	2	pseudo_transcript_0	0.146496	0.118758	1	1	pseudo_transcript_0	0.214414	0.591204	3	3	pseudo_transcript_0	0.177419	-1.78162	2	2
pseudo_8235	pseudo_transcript_0	0.621443	-0.00785586	4	4											pseudo_transcript_0	0.321199	-0.0366725	4	4	pseudo_transcript_0	0.820212	-0.0140073	3	3	pseudo_transcript_0	0.146496	0.118758	1	1	pseudo_transcript_0	0.451293	-0.260258	4	4	pseudo_transcript_0	0.750304	-0.28237	1	1	pseudo_transcript_0	0.301915	-0.646581	1	1
pseudo_9128	pseudo_transcript_0	0.312023	0.0525647	4	4	pseudo_transcript_0	0.47238	0.0354111	2	2	pseudo_transcript_0	0.292135	0.0507712	2	2	pseudo_transcript_0	0.873591	0.00779973	4	4	pseudo_transcript_0	0.825267	-0.0255423	2	2	pseudo_transcript_0	0.146496	0.118758	1	1	pseudo_transcript_0	0.882116	0.378139	6	6	pseudo_transcript_0	0.662532	0.240725	3	3	pseudo_transcript_0	0.749254	-0.113693	2	2
TBC1D4	P1P2	0.765419	-0.00313261	4	4	P1P2	0.826614	-0.0316052	4	4	P1P2	0.34563	0.0422013	2	2	P1P2	0.0644521	0.146792	5	5	P1P2	0.160354	0.125781	5	5	P1P2	0.0688565	0.118708	4	4	P1P2	0.84184	0.191226	3	3	P1P2	0.00542249	1.307	4	4	P1P2	0.064673	0.959013	2	2
pseudo_8778	pseudo_transcript_0	0.865735	0.0368427	4	4	pseudo_transcript_0	0.0446778	-0.145678	5	5	pseudo_transcript_0	0.562549	-0.00979849	3	3	pseudo_transcript_0	0.0732058	0.102609	4	4	pseudo_transcript_0	0.451441	0.115674	6	6	pseudo_transcript_0	0.0690824	0.118699	4	4	pseudo_transcript_0	0.329377	0.968904	5	5	pseudo_transcript_0	0.822128	-0.184793	5	5	pseudo_transcript_0	0.739097	0.22589	4	4
DUOX1	P1P2	0.558007	0.031491	4	4											P1P2	0.876433	0.0407435	4	4	P1P2	0.356141	0.11914	4	4	P1P2	0.146909	0.118692	1	1	P1P2	0.397294	0.578756	3	3	P1P2	0.26479	0.925484	1	1	P1P2	0.108207	1.38887	1	1
pseudo_7337	pseudo_transcript_0	0.53097	-0.0223509	5	5	pseudo_transcript_0	0.122117	-0.110186	4	4	pseudo_transcript_0	0.0698224	-0.0840459	2	2	pseudo_transcript_0	0.356405	0.171177	7	7	pseudo_transcript_0	0.686533	0.0812524	7	7	pseudo_transcript_0	0.00823925	0.118675	4	4	pseudo_transcript_0	0.887072	-0.193261	5	5	pseudo_transcript_0	0.179849	-0.930021	4	4	pseudo_transcript_0	0.937167	0.041294	2	2
IKBKB	P1P2	0.945324	0.0356847	6	6	P1P2	0.852792	-0.0286148	4	4	P1P2	0.786389	-0.00774723	4	4	P1P2	0.122306	0.0918291	5	5	P1P2	0.43878	0.0710445	7	7	P1P2	0.0208567	0.118645	5	5	P1P2	0.131152	1.1798	8	8	P1P2	0.511435	0.865937	4	4	P1P2	0.0777745	0.960717	3	3
PRKCH	P1P2	0.660585	0.0369757	4	4	P1P2	0.214307	-0.0834573	4	4	P1P2	0.763121	-0.00887491	1	1	P1P2	0.184105	0.0812596	4	4	P1P2	0.0965774	0.168654	4	4	P1P2	0.146909	0.118599	1	1	P1P2	0.412865	0.35933	3	3	P1P2	0.532604	0.234042	4	4	P1P2	0.595156	0.307197	1	1
pseudo_12599	pseudo_transcript_0	0.994445	0.00397382	4	4	pseudo_transcript_0	0.0337366	-0.167514	2	2	pseudo_transcript_0	0.0320242	-0.109376	2	2	pseudo_transcript_0	0.539385	0.0286221	3	3	pseudo_transcript_0	0.256989	0.0642804	5	5	pseudo_transcript_0	0.0467336	0.118589	2	2	pseudo_transcript_0	0.436478	0.370423	4	4	pseudo_transcript_0	0.505658	-0.441094	2	2	pseudo_transcript_0	0.871336	-0.069247	2	2
AP1G1	P1P2	0.374457	-0.0408587	4	4	P1P2	0.658963	0.0198769	3	3	P1P2	0.360259	-0.027087	2	2	P1P2	0.716341	-0.0425784	3	3	P1P2	0.906752	0.031295	4	4	P1P2	0.146909	0.118532	1	1	P1P2	0.410245	0.431542	3	3	P1P2	0.180417	1.18068	1	1	P1P2	0.271653	0.667937	1	1
GINS2	P1P2	0.432011	-0.0336348	3	3	P1P2	0.614718	0.0326105	1	1						P1P2	0.990032	0.000923286	3	3	P1P2	0.117962	0.204637	1	1	P1P2	0.146909	0.118508	1	1	P1P2	0.635416	-0.238457	2	2	P1P2	0.0860883	2.31984	1	1
GZMK	P1P2	0.464313	0.036154	3	3	P1P2	0.707691	-0.0539299	4	4	P1P2	0.108502	-0.125708	1	1	P1P2	0.30036	-0.0604804	2	2	P1P2	0.562701	0.106329	6	6	P1P2	0.146909	0.118482	1	1	P1P2	0.61683	0.242427	4	4	P1P2	0.789957	-0.158353	3	3	P1P2	0.52173	0.320889	2	2
pseudo_12189	pseudo_transcript_0	0.740123	-0.0334049	4	4	pseudo_transcript_0	0.663981	0.0508346	5	5	pseudo_transcript_0	0.177348	-0.0864718	1	1	pseudo_transcript_0	0.694661	0.0514266	5	5	pseudo_transcript_0	0.621978	-0.0283966	3	3	pseudo_transcript_0	0.147322	0.118465	1	1	pseudo_transcript_0	0.849556	-0.177254	4	4	pseudo_transcript_0	0.766891	-0.67661	5	5	pseudo_transcript_0	0.358232	0.4512	2	2
pseudo_565	pseudo_transcript_0	0.681628	0.0223336	2	2	pseudo_transcript_0	0.562443	-0.0347674	6	6	pseudo_transcript_0	0.782646	0.0161735	2	2	pseudo_transcript_0	0.807533	-0.0182036	2	2	pseudo_transcript_0	0.780369	0.0661592	6	6	pseudo_transcript_0	0.147322	0.118465	1	1	pseudo_transcript_0	0.0115841	-1.10965	5	5	pseudo_transcript_0	0.492354	0.334029	4	4
ACE	P1	0.280759	0.060268	4	4	P2	0.0607061	-0.0997171	5	5	P2	0.0650331	-0.0575045	3	3	P1	0.0377083	0.137303	7	7	P1	0.494908	0.0504045	8	8	P1	0.0464528	0.118454	6	6	P1	0.0139587	1.34331	6	6	P2	0.219004	-1.08491	4	4	P1	0.0885814	1.16156	3	3
CT45A1	ENST00000370741.3,ENST00000482795.1,ENST00000497301.2	0.710752	0.0150883	5	5	ENST00000370741.3,ENST00000482795.1,ENST00000497301.2	0.353791	0.00827143	5	5	ENST00000370741.3,ENST00000482795.1,ENST00000497301.2	0.246593	0.051649	2	2	ENST00000370741.3,ENST00000482795.1,ENST00000497301.2	0.533773	0.0610876	5	5	ENST00000370741.3,ENST00000482795.1,ENST00000497301.2	0.171841	0.241196	7	7	ENST00000370741.3,ENST00000482795.1,ENST00000497301.2	0.0240502	0.118436	5	5	ENST00000370741.3,ENST00000482795.1,ENST00000497301.2	0.705576	-0.249544	3	3	ENST00000370741.3,ENST00000482795.1,ENST00000497301.2	0.476078	0.546194	4	4	ENST00000370741.3,ENST00000482795.1,ENST00000497301.2	0.951483	0.069795	1	1
FEV	P1P2	0.259919	-0.0659837	2	2	P1P2	0.167708	-0.103912	4	4	P1P2	0.313812	-0.052298	2	2	P1P2	0.387398	0.0433338	6	6	P1P2	0.0448733	0.237767	5	5	P1P2	0.0250796	0.118409	3	3	P1P2	0.00758468	-1.23314	4	4	P1P2	0.734343	-0.221898	3	3	P1P2	0.912121	-0.0305637	2	2
OGDHL	P1P2	0.0508376	0.172668	4	4	P1P2	0.0251959	-0.164123	5	5	P1P2	0.525718	-0.0171766	3	3	P1P2	0.377304	-0.0498953	3	3	P1P2	0.0708083	0.222095	5	5	P1P2	0.0660765	0.118403	2	2	P1P2	0.220533	0.920426	5	5	P1P2	0.517318	0.385637	4	4	P1P2	0.410284	0.303165	3	3
pseudo_3585	pseudo_transcript_0	0.303532	-0.0451687	4	4	pseudo_transcript_0	0.367458	-0.0410735	5	5	pseudo_transcript_0	0.276613	-0.0262635	3	3	pseudo_transcript_0	0.0677187	0.11889	5	5	pseudo_transcript_0	0.0686286	0.106221	3	3	pseudo_transcript_0	0.0402143	0.118371	2	2	pseudo_transcript_1	0.263272	-0.711334	4	4	pseudo_transcript_0	0.478905	-0.134963	4	4	pseudo_transcript_0	0.855561	-0.216737	2	2
pseudo_9249	pseudo_transcript_0	0.383076	-0.0678408	4	4	pseudo_transcript_0	0.889051	0.00489892	3	3	pseudo_transcript_0	0.968271	0.00795174	2	2	pseudo_transcript_0	0.245066	0.0794969	3	3	pseudo_transcript_0	0.128816	0.216659	7	7	pseudo_transcript_0	0.0404185	0.118322	2	2	pseudo_transcript_0	0.836313	0.115983	4	4	pseudo_transcript_0	0.156524	0.788171	3	3	pseudo_transcript_0	0.384296	0.556143	2	2
KCNA5	P1P2	0.0790094	-0.0842188	3	3	P1P2	0.378776	-0.0377752	3	3						P1P2	0.303346	0.0586262	2	2	P1P2	0.867326	0.0170902	2	2	P1P2	0.147736	0.118306	1	1	P1P2	0.969725	-0.0469473	3	3
DCTN1	P1P2	0.019452	-0.111997	4	4	P1P2	0.424101	-0.0614351	4	4	P1P2	0.4677	-0.0312298	1	1	P1P2	0.536038	0.0543278	4	4	P1P2	0.00663716	0.182239	4	4	P1P2	0.021937	0.118283	3	3	P1P2	0.384618	-0.347394	5	5	P1P2	0.218246	1.42935	5	5	P1P2	0.860062	0.157644	2	2
CELSR1	P1P2	0.237174	-0.0552288	3	3	P1P2	0.94439	-0.0135474	3	3	P1P2	0.927669	0.00125776	1	1	P1P2	0.258197	0.0549229	3	3	P1P2	0.740274	0.0259077	2	2	P1P2	0.147736	0.118262	1	1	P1P2	0.995229	0.00127201	1	1	P1P2	0.614652	0.391569	1	1
IDH3B	P1P2	0.525377	-0.0238203	6	6	P1P2	0.0720102	-0.119726	5	5	P1P2	0.257615	-0.0327806	4	4	P1P2	0.991364	0.065512	8	8	P1P2	0.114782	0.171496	6	6	P1P2	0.09886	0.118234	5	5	P1P2	0.849589	-0.350078	5	5	P1P2	0.425851	0.745139	7	7	P1P2	0.10683	0.600332	4	4
pseudo_3450	pseudo_transcript_0	0.766441	0.00719876	5	5	pseudo_transcript_0	0.383603	0.0324511	3	3	pseudo_transcript_0	0.98055	0.00561385	2	2	pseudo_transcript_0	0.402556	0.105027	5	5	pseudo_transcript_0	0.320653	0.0295909	4	4	pseudo_transcript_0	0.0414526	0.118218	2	2	pseudo_transcript_0	0.668535	0.185881	4	4	pseudo_transcript_0	0.181436	0.782745	3	3	pseudo_transcript_0	0.146	0.673628	3	3
pseudo_7179	pseudo_transcript_0	0.686727	-0.0493065	4	4	pseudo_transcript_0	0.755638	-0.0685744	5	5	pseudo_transcript_0	0.984644	0.000749969	2	2	pseudo_transcript_0	0.973007	0.00260243	3	3	pseudo_transcript_0	0.0244277	0.219014	2	2	pseudo_transcript_0	0.0518084	0.118183	2	2	pseudo_transcript_0	0.856326	-0.0880247	2	2	pseudo_transcript_0	0.702024	0.228905	2	2	pseudo_transcript_0	0.593752	-0.300266	1	1
MLKL	P1P2	0.247795	0.00108426	6	6	P1P2	0.709368	-0.0405219	6	6	P1P2	0.899416	-0.0211174	5	5	P1P2	0.583923	0.0604328	6	6	P1P2	0.193045	0.191502	6	6	P1P2	0.140005	0.118177	5	5	P1P2	0.19164	0.51593	6	6	P1P2	0.291605	0.603167	4	4	P1P2	0.0473551	0.754064	4	4
pseudo_15496	pseudo_transcript_0	0.46751	-0.0274549	4	4	pseudo_transcript_0	0.527462	0.0248412	4	4	pseudo_transcript_0	0.176184	-0.0865727	1	1	pseudo_transcript_0	0.423718	0.0932418	5	5	pseudo_transcript_0	0.210968	0.0697048	7	7	pseudo_transcript_0	0.116927	0.118047	4	4	pseudo_transcript_0	0.806327	-0.505476	7	7	pseudo_transcript_0	0.892264	0.0872956	3	3	pseudo_transcript_0	0.118841	-1.26194	1	1
KRT77	P1P2	0.401131	-0.0868684	6	6	P1P2	0.279303	-0.0745839	5	5	P1P2	0.15343	-0.0769625	4	4	P1P2	0.424886	0.0807636	5	5	P1P2	0.0505439	0.18714	5	5	P1P2	0.0752996	0.118021	3	3	P1P2	0.539307	-0.708592	4	4	P1P2	0.089473	1.15018	4	4	P1P2	0.332833	0.348293	3	3
LONP2	P2	0.0934738	0.115934	4	4	P2	0.19824	0.0608238	5	5	P2	0.0547514	0.0881852	2	2	P1	0.0643939	0.212667	5	5	P2	0.114275	0.133369	4	4	P1	0.040011	0.118021	2	2	P2	0.0794376	1.29556	4	4	P1	0.25942	0.684941	6	6	P2	0.155641	0.562689	3	3
MMP27	P1P2	0.671526	0.0313889	1	1	P1P2	0.767508	-0.0207055	1	1						P1P2	0.325615	0.0362194	4	4	P1P2	0.310836	0.0882985	2	2	P1P2	0.147736	0.118017	1	1
RGS6	P1P2	0.435659	0.0579531	6	6	P1P2	0.206015	-0.107765	6	6	P1P2	0.122701	-0.0591034	4	4	P1P2	0.184998	0.035289	5	5	P1P2	0.107578	0.195386	6	6	P1P2	0.0166096	0.118009	5	5	P1P2	0.483928	0.398966	6	6	P1P2	0.277247	0.663497	4	4	P1P2	0.299449	0.329534	4	4
LOC643037	P1P2	0.582899	0.0629091	5	5	P1P2	0.998482	-0.0150488	3	3	P1P2	0.448381	0.032948	3	3	P1P2	0.732306	0.0575992	6	6	P1P2	0.0175652	0.171075	6	6	P1P2	0.051248	0.117992	5	5	P1P2	0.653023	0.603893	4	4	P1P2	0.304023	0.621649	3	3	P1P2	0.0241606	1.40185	2	2
ZFPL1	P1P2	0.420449	-0.0214184	7	7	P1P2	0.208529	-0.116467	5	5	P1P2	0.226282	-0.0345632	4	4	P1P2	0.741532	0.0195853	8	8	P1P2	0.221602	0.168787	6	6	P1P2	0.156318	0.11798	5	5	P1P2	0.666137	-0.478098	6	6	P1P2	0.901789	-0.140671	3	3	P1P2	0.179274	-0.604672	2	2
NOB1	P1P2	0.267237	-0.0614963	4	4	P1P2	0.0182659	-0.161509	3	3	P1P2	0.0381441	-0.111503	3	3	P1P2	0.595437	0.0265852	3	3	P1P2	0.057783	0.188056	4	4	P1P2	0.0515567	0.117977	2	2	P1P2	0.0170686	-1.60778	5	5	P1P2	0.231092	0.709783	2	2	P1P2	0.945023	-0.000443339	1	1
PHYHIP	P1P2	0.0832823	0.145677	5	5	P1P2	0.40433	0.0272499	4	4	P1P2	0.0648547	0.138429	4	4	P1P2	0.797705	0.0067081	5	5	P1P2	0.0114942	0.204309	6	6	P1P2	0.0282542	0.117975	4	4	P1P2	0.372836	1.13642	7	7	P1P2	0.0733213	1.48241	3	3	P1P2	0.0328969	1.58284	3	3
TRIM24	P1P2	0.254683	0.0263831	8	8	P1P2	0.207271	-0.0593605	10	10	P1P2	0.828356	-0.0210002	8	8	P1P2	0.836805	0.00709073	8	8	P1P2	0.0242331	0.243534	5	5	P1P2	0.0183641	0.117939	5	5	P1P2	0.428223	0.448195	8	8	P1P2	0.174409	2.19962	5	5	P1P2	0.0875498	1.25817	5	5
pseudo_13043	pseudo_transcript_0	0.640519	-0.0418423	3	3	pseudo_transcript_0	0.498129	0.0394047	2	2						pseudo_transcript_0	0.32085	0.0533155	3	3	pseudo_transcript_0	0.147033	0.0920026	4	4	pseudo_transcript_0	0.148151	0.117919	1	1	pseudo_transcript_0	0.821093	-0.108766	2	2	pseudo_transcript_0	0.0637468	1.56334	2	2	pseudo_transcript_0	0.13604	1.16332	1	1
pseudo_8279	pseudo_transcript_0	0.927823	0.00851102	1	1	pseudo_transcript_0	0.196438	-0.112279	4	4	pseudo_transcript_0	0.543045	0.0393468	1	1	pseudo_transcript_0	0.432144	-0.0460594	3	3	pseudo_transcript_0	0.882663	-0.0240174	3	3	pseudo_transcript_0	0.148151	0.117919	1	1	pseudo_transcript_0	0.106645	1.99217	1	1	pseudo_transcript_0	0.16418	0.803447	2	2
SMARCC1	P1P2	0.439103	-0.0183379	5	5											P1P2	0.187068	0.112537	8	8	P1P2	0.508602	0.114019	2	2	P1P2	0.102544	0.117908	2	2	P1P2	0.599373	-0.466278	5	5	P1P2	0.700418	-0.332756	1	1	P1P2	0.21753	-0.848891	1	1
MDH1B	P1P2	0.988085	0.000443489	3	3	P1P2	0.241697	-0.0798327	2	2	P1P2	0.106913	-0.130523	1	1	P1P2	0.695852	-0.016399	5	5	P1P2	0.608897	0.0710893	2	2	P1P2	0.148567	0.117884	1	1	P1P2	0.494252	-0.629754	4	4	P1P2	0.337089	0.782183	1	1	P1P2	0.696975	-0.200134	1	1
pseudo_18542	pseudo_transcript_0	0.715311	0.0295468	3	3	pseudo_transcript_0	0.097146	-0.0820209	3	3	pseudo_transcript_0	0.624932	-0.0256674	2	2	pseudo_transcript_0	0.199653	0.117861	6	6	pseudo_transcript_0	0.145203	0.136441	3	3	pseudo_transcript_0	0.0515567	0.117847	2	2	pseudo_transcript_0	0.692621	-0.149993	4	4	pseudo_transcript_0	0.661987	-0.266176	3	3	pseudo_transcript_0	0.980561	-0.0252087	2	2
pseudo_13370	pseudo_transcript_0	0.930861	-0.00210348	7	7	pseudo_transcript_0	0.326466	-0.0696094	5	5	pseudo_transcript_0	0.629031	-0.0271885	4	4	pseudo_transcript_0	0.0436518	0.206615	6	6	pseudo_transcript_0	0.465872	0.0579984	4	4	pseudo_transcript_0	0.0124492	0.117721	3	3	pseudo_transcript_0	0.35625	0.445699	4	4	pseudo_transcript_0	0.959193	0.106883	3	3	pseudo_transcript_0	0.61088	0.385708	2	2
pseudo_10665	pseudo_transcript_0	0.665638	-0.0189611	4	4	pseudo_transcript_0	0.0576435	-0.0944792	4	4	pseudo_transcript_0	0.394928	-0.0526379	2	2	pseudo_transcript_0	0.863305	-0.0102092	4	4	pseudo_transcript_0	0.172523	0.162703	1	1	pseudo_transcript_0	0.148984	0.117693	1	1	pseudo_transcript_0	0.525903	-0.0824087	3	3	pseudo_transcript_0	0.730379	-0.010994	3	3	pseudo_transcript_0	0.114553	0.834806	2	2
pseudo_12339	pseudo_transcript_1	0.0325932	0.155836	2	2	pseudo_transcript_1	0.486084	-0.0165597	5	5	pseudo_transcript_0	0.614496	0.0266433	3	3	pseudo_transcript_1	0.372293	0.0726824	1	1	pseudo_transcript_0	0.288399	-0.104902	4	4	pseudo_transcript_1	0.148984	0.117693	1	1	pseudo_transcript_0	0.434654	0.913077	6	6	pseudo_transcript_0	0.15499	-1.11675	3	3	pseudo_transcript_1	0.530909	0.221042	4	4
LACTBL1	ENST00000426928.2	0.0382355	-0.157336	2	2	ENST00000426928.2	0.2899	-0.0653924	3	3	ENST00000426928.2	0.0318192	-0.137017	2	2	ENST00000426928.2	0.458673	0.0581945	2	2	ENST00000426928.2	0.103531	0.177165	2	2	ENST00000426928.2	0.0414526	0.11768	2	2	ENST00000426928.2	0.698327	-0.535102	3	3	ENST00000426928.2	0.91906	0.0212973	4	4	ENST00000426928.2	0.820501	-0.0757418	3	3
PDE6B	ENST00000255622.6,ENST00000496514.1	0.835722	0.00917742	4	4	ENST00000255622.6,ENST00000496514.1	0.205402	-0.0708522	2	2	ENST00000255622.6,ENST00000496514.1	0.463762	-0.0230944	2	2	ENST00000255622.6,ENST00000496514.1	0.981351	-0.0188132	5	5	ENST00000255622.6,ENST00000496514.1	0.150428	0.082167	6	6	ENST00000255622.6,ENST00000496514.1	0.00834789	0.117676	4	4	ENST00000255622.6,ENST00000496514.1	0.290078	0.346038	4	4	ENST00000255622.6,ENST00000496514.1	0.141078	0.752254	3	3	ENST00000255622.6,ENST00000496514.1	0.207719	0.507647	2	2
pseudo_10741	pseudo_transcript_0	0.522813	-0.028584	4	4	pseudo_transcript_0	0.598798	0.0378915	7	7	pseudo_transcript_0	0.851177	0.0178842	4	4	pseudo_transcript_0	0.682039	-0.0167507	3	3	pseudo_transcript_0	0.984626	0.0364994	6	6	pseudo_transcript_0	0.14982	0.117667	1	1	pseudo_transcript_0	0.164565	-0.669228	3	3	pseudo_transcript_0	0.454927	0.589666	5	5	pseudo_transcript_0	0.835364	-0.069705	2	2
pseudo_13767	pseudo_transcript_0	0.562505	-0.0297016	2	2	pseudo_transcript_0	0.0331657	-0.110765	4	4	pseudo_transcript_0	0.0640898	-0.0834258	2	2	pseudo_transcript_0	0.900987	0.0363206	3	3	pseudo_transcript_0	0.310606	0.12414	4	4	pseudo_transcript_0	0.14982	0.117667	1	1	pseudo_transcript_0	0.0512588	-1.17676	2	2	pseudo_transcript_0	0.0950053	1.0174	2	2	pseudo_transcript_0	0.850391	0.12049	1	1
pseudo_13874	pseudo_transcript_0	0.289725	-0.0846183	4	4	pseudo_transcript_0	0.367648	-0.0617738	4	4	pseudo_transcript_0	0.285139	-0.0478451	2	2	pseudo_transcript_0	0.291581	-0.0459072	3	3	pseudo_transcript_0	0.936896	-0.0542992	4	4	pseudo_transcript_0	0.14982	0.117667	1	1	pseudo_transcript_0	0.446694	0.157213	6	6	pseudo_transcript_0	0.828483	0.0800639	2	2	pseudo_transcript_0	0.497806	-0.325069	2	2
pseudo_5224	pseudo_transcript_0	0.0842975	-0.0340434	6	6	pseudo_transcript_0	0.045091	-0.101243	4	4	pseudo_transcript_0	0.165947	-0.0651182	3	3	pseudo_transcript_0	0.550786	0.0483663	6	6	pseudo_transcript_0	0.118748	0.197818	7	7	pseudo_transcript_0	0.147435	0.117606	5	5	pseudo_transcript_0	0.542823	0.382572	5	5	pseudo_transcript_0	0.83997	-0.570202	4	4	pseudo_transcript_0	0.777611	0.121806	4	4
pseudo_9488	pseudo_transcript_0	0.22038	-0.0403455	6	6	pseudo_transcript_0	0.671402	0.0240517	3	3	pseudo_transcript_0	0.29316	0.0653007	1	1	pseudo_transcript_0	0.363235	0.0753078	6	6	pseudo_transcript_0	0.917767	-0.0124529	4	4	pseudo_transcript_0	0.0408295	0.117548	2	2	pseudo_transcript_0	0.608025	0.535039	7	7	pseudo_transcript_0	0.163459	-0.781436	3	3	pseudo_transcript_0	0.880374	0.0695513	2	2
BAP1	P1P2	0.368765	0.051678	7	7	P1P2	0.10127	0.104093	4	4	P1P2	0.923254	0.000183175	3	3	P1P2	0.643133	0.0886391	9	9	P1P2	0.207165	0.0991359	7	7	P1P2	0.117157	0.117514	7	7	P1P2	0.799348	0.23593	7	7	P1P2	0.058525	1.52047	2	2	P1P2	0.469181	0.708253	2	2
ELP3	P1P2	0.714644	0.0542352	6	6	P1P2	0.766884	0.0128651	4	4	P1P2	0.97441	0.00833677	2	2	P1P2	0.714039	-0.0683746	8	8	P1P2	0.337436	0.0962081	5	5	P1P2	0.0438475	0.117491	5	5	P1P2	0.911365	0.271057	6	6	P1P2	0.472657	0.396098	2	2	P1P2	0.362749	0.384778	2	2
TMEM87A	P1P2	0.293148	-0.0370441	8	8	P1P2	0.0636062	-0.147751	7	7	P1P2	0.0295799	-0.0356509	6	6	P1P2	0.27329	0.021853	7	7	P1P2	0.203856	0.0939777	6	6	P1P2	0.0817945	0.117448	5	5	P1P2	0.578114	0.17115	9	9	P1P2	0.187119	0.622512	5	5	P1P2	0.752831	0.136187	5	5
CNTD2	P1	0.436828	-0.0386386	2	2	P2	0.205329	0.048772	4	4	P1	0.152526	-0.0968117	1	1	P2	0.442638	0.075813	5	5	P1	0.127626	0.0908564	3	3	P2	0.12655	0.117442	4	4	P1	0.160563	1.22752	1	1	P1	0.839997	0.107805	2	2	P2	0.0655076	0.8856	2	2
IRF4	P2	0.244966	0.0978924	1	1	P1	0.156249	0.0792624	2	2	P1	0.391474	-0.0392679	1	1	P2	0.389519	0.048868	3	3	P2	0.185659	0.0930087	3	3	P2	0.0559775	0.117375	2	2	P1	0.183705	-1.0659	1	1	P1	0.573242	0.317972	2	2	P2	0.12925	-1.15581	1	1
pseudo_7079	pseudo_transcript_0	0.895075	-0.00616722	6	6	pseudo_transcript_0	0.856585	-0.0122103	3	3	pseudo_transcript_0	0.700761	-0.00543835	3	3	pseudo_transcript_0	0.772789	0.0170859	6	6	pseudo_transcript_0	0.0405329	0.235159	4	4	pseudo_transcript_0	0.0543824	0.117361	2	2	pseudo_transcript_0	0.432984	1.09129	6	6	pseudo_transcript_0	0.794171	0.278387	2	2	pseudo_transcript_0	0.795307	0.306839	2	2
PPARGC1A	P1	0.746989	0.0745676	6	6	P2	0.196628	-0.111082	4	4	P2	0.293501	-0.0545662	4	4	P2	0.231718	0.079281	7	7	P2	0.209424	0.132045	6	6	P2	0.0655389	0.117296	6	6	P1	0.0969946	0.493267	6	6	P1	0.246461	1.23665	5	5	P1	0.477935	0.353084	4	4
pseudo_4935	pseudo_transcript_0	0.879926	-0.00560136	3	3	pseudo_transcript_0	0.16039	-0.0628863	4	4	pseudo_transcript_0	0.228258	-0.040456	2	2	pseudo_transcript_0	0.229795	0.107173	6	6	pseudo_transcript_0	0.210248	0.036668	6	6	pseudo_transcript_0	0.0535645	0.117238	4	4	pseudo_transcript_0	0.998808	-0.248823	4	4	pseudo_transcript_0	0.698378	0.176002	3	3	pseudo_transcript_0	0.701951	-0.177538	2	2
pseudo_638	pseudo_transcript_0	0.241561	0.0682412	7	7	pseudo_transcript_0	0.121216	-0.129781	5	5	pseudo_transcript_0	0.515522	-0.0311541	3	3	pseudo_transcript_0	0.249182	-0.15054	6	6	pseudo_transcript_0	0.00801899	0.204938	5	5	pseudo_transcript_0	0.0382283	0.117186	4	4	pseudo_transcript_0	0.733913	0.422782	7	7	pseudo_transcript_0	0.216358	0.644684	3	3	pseudo_transcript_0	0.427106	0.294489	3	3
GAB3	P1P2	0.423632	-0.0454776	4	4	P1P2	0.922207	0.00462034	3	3						P1P2	0.172942	0.156076	2	2	P1P2	0.358918	0.0567352	5	5	P1P2	0.15024	0.117168	1	1	P1P2	0.652524	-0.33191	3	3	P1P2	0.549709	0.335588	3	3	P1P2	0.782678	-0.113358	1	1
EIF3H	P1P2	0.50486	-0.0346622	4	4	P1P2	0.217181	-0.0975975	5	5	P1P2	0.179104	-0.0860155	1	1	P1P2	0.0495633	0.197642	4	4	P1P2	0.087381	0.179576	7	7	P1P2	0.100359	0.11713	2	2	P1P2	0.0884785	1.2436	6	6	P1P2	0.493998	0.46094	4	4	P1P2	0.126185	0.686614	2	2
ANXA8L1	ENST00000359178.4	0.740439	0.0468223	5	5	ENST00000359178.4	0.936318	-0.00580607	3	3	ENST00000359178.4	0.878641	0.012124	2	2	ENST00000359178.4	0.280464	0.0472752	5	5	ENST00000359178.4	0.819557	0.104143	5	5	ENST00000359178.4	0.0845631	0.117055	2	2	ENST00000359178.4	0.155321	1.73099	5	5	ENST00000359178.4	0.942415	-0.0982361	3	3	ENST00000359178.4	0.553701	0.338438	1	1
pseudo_10833	pseudo_transcript_0	0.0604824	0.124529	4	4	pseudo_transcript_0	0.326843	0.0469775	4	4	pseudo_transcript_0	0.0268703	0.12703	2	2	pseudo_transcript_0	0.796655	-0.0380134	3	3	pseudo_transcript_0	0.491408	-0.0504634	5	5	pseudo_transcript_0	0.15066	0.117039	1	1	pseudo_transcript_0	0.936487	0.805172	5	5	pseudo_transcript_0	0.976589	0.258291	3	3	pseudo_transcript_0	0.0843533	2.61848	1	1
pseudo_15608	pseudo_transcript_0	0.72071	0.0782226	6	6	pseudo_transcript_0	0.0697846	0.0980269	4	4	pseudo_transcript_0	0.170474	0.0698924	3	3	pseudo_transcript_0	0.323394	0.0515792	3	3	pseudo_transcript_0	0.102149	0.123179	2	2	pseudo_transcript_0	0.15066	0.117039	1	1	pseudo_transcript_0	0.390978	1.09314	5	5	pseudo_transcript_0	0.0278966	1.86917	2	2	pseudo_transcript_0	0.0843533	2.61848	1	1
pseudo_11147	pseudo_transcript_0	0.296593	-0.175782	7	7	pseudo_transcript_0	0.45125	-0.153071	7	7	pseudo_transcript_0	0.708757	0.028536	5	5	pseudo_transcript_0	0.0584424	0.141892	6	6	pseudo_transcript_0	0.0536447	0.20615	7	7	pseudo_transcript_0	0.024848	0.117038	5	5	pseudo_transcript_0	0.480889	0.42987	6	6	pseudo_transcript_0	0.045742	1.39781	6	6	pseudo_transcript_0	0.0188978	1.03827	4	4
POLR2C																P1P2	0.178319	0.123281	1	1	P1P2	0.0182275	0.161531	3	3	P1P2	0.151082	0.116895	1	1
C12orf56	P1P2	0.480405	-0.0307864	4	4	P1P2	0.917938	-0.057589	6	6	P1P2	0.931491	0.0102485	2	2	P1P2	0.0162993	0.158027	6	6	P1P2	0.980693	0.0634014	8	8	P1P2	0.143272	0.11684	6	6	P1P2	0.768198	0.123229	4	4	P1P2	0.900608	-0.169606	6	6	P1P2	0.900764	0.0828158	2	2
pseudo_3094	pseudo_transcript_0	0.32998	0.0626217	3	3	pseudo_transcript_0	0.25786	-0.0764416	4	4	pseudo_transcript_0	0.512197	0.042451	1	1	pseudo_transcript_0	0.972713	0.0738842	6	6	pseudo_transcript_0	0.0929189	0.109824	4	4	pseudo_transcript_0	0.11501	0.116802	3	3	pseudo_transcript_0	0.049846	-1.15461	2	2	pseudo_transcript_0	0.860903	0.00775706	4	4	pseudo_transcript_0	0.978965	0.0291569	1	1
pseudo_1205	pseudo_transcript_0	0.456849	0.0860073	7	7	pseudo_transcript_0	0.84376	-0.0847456	4	4	pseudo_transcript_0	0.63078	0.0183435	3	3	pseudo_transcript_0	0.71439	0.0567639	7	7	pseudo_transcript_0	0.278428	0.126455	5	5	pseudo_transcript_0	0.148547	0.116802	5	5	pseudo_transcript_0	0.573099	0.3562	6	6	pseudo_transcript_0	0.122765	0.872486	3	3	pseudo_transcript_0	0.124068	0.657877	2	2
PKP4	P1P2	0.891224	-0.0473365	6	6	P1P2	0.414905	-0.083884	6	6	P1P2	0.0337065	-0.0961237	3	3	P1P2	0.0101333	0.159342	5	5	P1P2	0.673726	-0.0411134	5	5	P1P2	0.0546456	0.116797	2	2	P1P2	0.169446	1.25429	7	7	P1P2	0.20091	-1.28803	5	5	P1P2	0.449533	-0.324746	4	4
pseudo_17299	pseudo_transcript_0	0.164946	0.133783	1	1	pseudo_transcript_0	0.0170263	-0.126417	5	5						pseudo_transcript_0	0.982192	0.00240979	2	2	pseudo_transcript_0	0.111981	0.116242	5	5	pseudo_transcript_0	0.151504	0.116762	1	1	pseudo_transcript_0	0.0765788	0.971292	5	5	pseudo_transcript_0	0.968205	0.608486	6	6	pseudo_transcript_0	0.407059	0.46033	4	4
pseudo_4777	pseudo_transcript_0	0.977662	-0.0726293	6	6	pseudo_transcript_0	0.371911	-0.0302985	5	5	pseudo_transcript_0	0.665406	-0.00650682	3	3	pseudo_transcript_0	0.352276	0.15686	6	6	pseudo_transcript_0	0.666329	-0.00878377	7	7	pseudo_transcript_0	0.0442485	0.116728	4	4	pseudo_transcript_0	0.492596	1.0423	6	6	pseudo_transcript_0	0.870125	0.22278	4	4	pseudo_transcript_0	0.197842	0.695039	3	3
OR3A1	ENST00000323404.1	0.708766	-0.0176318	5	5	ENST00000323404.1	0.689089	-0.0343211	2	2	ENST00000323404.1	0.562798	-0.0177726	2	2	ENST00000323404.1	0.771945	0.0160289	6	6	ENST00000323404.1	0.267305	0.113961	1	1	ENST00000323404.1	0.151927	0.116728	1	1	ENST00000323404.1	0.983793	-0.412315	6	6	ENST00000323404.1	0.355138	0.634333	2	2	ENST00000323404.1	0.417213	0.456767	1	1
KCNS1	P1P2	0.286825	-0.0816461	1	1	P1P2	0.717914	0.0161086	2	2						P1P2	0.244357	0.0411218	4	4	P1P2	0.368583	0.0358641	4	4	P1P2	0.151927	0.11672	1	1	P1P2	0.705202	0.165463	2	2	P1P2	0.417223	0.64788	1	1
pseudo_5056	pseudo_transcript_0	0.454241	0.053052	5	5	pseudo_transcript_0	0.301912	-0.053085	3	3	pseudo_transcript_0	0.293597	-0.0307878	3	3	pseudo_transcript_0	0.27742	0.0888287	6	6	pseudo_transcript_0	0.084633	0.164697	6	6	pseudo_transcript_0	0.0971148	0.116658	5	5	pseudo_transcript_0	0.294641	0.529116	4	4	pseudo_transcript_0	0.0758939	0.981155	3	3	pseudo_transcript_0	0.0456261	0.735655	3	3
pseudo_9996	pseudo_transcript_0	0.00643896	-0.188101	6	6	pseudo_transcript_0	0.57609	0.0218688	5	5	pseudo_transcript_0	0.0673512	-0.0594666	3	3	pseudo_transcript_0	0.259845	0.11768	4	4	pseudo_transcript_0	0.858525	-0.0577858	4	4	pseudo_transcript_0	0.152351	0.116653	1	1	pseudo_transcript_0	0.873031	0.74208	7	7	pseudo_transcript_0	0.649541	0.769802	6	6	pseudo_transcript_0	0.330639	0.52175	4	4
PFN3	P1P2	0.522167	-0.0681237	4	4	P1P2	0.537918	0.0530734	4	4	P1P2	0.518909	-0.022415	3	3	P1P2	0.952263	-0.0143642	3	3	P1P2	0.150025	0.102577	4	4	P1P2	0.152776	0.116648	1	1	P1P2	0.0620434	-1.09624	6	6	P1P2	0.0356395	1.49346	2	2	P1P2	0.899933	-0.0261503	1	1
ARL8A	P1P2	0.0941794	-0.0839568	3	3	P1P2	0.917797	-0.0238365	4	4	P1P2	0.372514	-0.0258377	2	2	P1P2	0.10287	0.0808983	4	4	P1P2	0.124146	0.151038	5	5	P1P2	0.042938	0.116641	2	2	P1P2	0.764822	0.0482964	5	5	P1P2	0.245465	0.687253	4	4	P1P2	0.34052	0.413257	2	2
BATF	P1P2	0.847669	-0.0180011	5	5	P1P2	0.0297232	-0.191263	7	7	P1P2	0.0736091	-0.114548	5	5	P1P2	0.795844	0.0770621	7	7	P1P2	0.199096	0.146855	7	7	P1P2	0.0813312	0.116628	5	5	P1P2	0.776961	0.108853	4	4	P1P2	0.485296	-0.895178	6	6	P1P2	0.705735	-0.0893183	4	4
pseudo_12875	pseudo_transcript_0	0.199391	-0.0120099	5	5	pseudo_transcript_0	0.700763	-0.02897	4	4	pseudo_transcript_0	0.896886	-0.00633952	2	2	pseudo_transcript_0	0.135578	0.112896	7	7	pseudo_transcript_0	0.178846	0.0866088	6	6	pseudo_transcript_0	0.103739	0.116604	4	4	pseudo_transcript_0	0.404472	0.176214	6	6	pseudo_transcript_0	0.942415	-0.460446	3	3	pseudo_transcript_0	0.854307	-0.0324813	3	3
RFXAP	P1P2	0.399005	-0.0447842	4	4	P1P2	0.491527	-0.0615789	4	4	P1P2	0.0347941	-0.105531	2	2	P1P2	0.141628	0.108508	6	6	P1P2	0.242795	0.0897619	7	7	P1P2	0.0273803	0.116592	5	5	P1P2	0.890779	0.277301	6	6	P1P2	0.222287	-0.735025	3	3	P1P2	0.532258	-0.221398	3	3
GBA3	P1P2	0.766781	0.0240952	5	5	P1P2	0.965407	-0.00221081	4	4	P1P2	0.518659	0.0482549	2	2	P1P2	0.629777	0.0227863	3	3	P1P2	0.295072	0.0771915	3	3	P1P2	0.152776	0.116589	1	1	P1P2	0.0732127	1.75899	2	2	P1P2	0.124443	1.28514	5	5	P1P2	0.0854537	2.24035	1	1
CSNK2B	P1P2	0.850108	0.0241919	5	5	P1P2	0.0174697	0.108958	3	3	P1P2	0.694938	0.028046	1	1	P1P2	0.00873916	0.305023	6	6	P1P2	0.366368	-0.0183726	7	7	P1P2	0.0955252	0.116535	4	4	P1P2	0.198229	1.4056	9	9	P1P2	0.526684	0.945044	5	5	P1P2	0.912139	-0.0500051	4	4
pseudo_12447	pseudo_transcript_0	0.739257	-0.0203922	2	2	pseudo_transcript_0	0.375097	-0.0424526	6	6	pseudo_transcript_0	0.316284	-0.0436143	2	2	pseudo_transcript_0	0.284261	0.0507283	3	3	pseudo_transcript_0	0.574094	0.0352755	3	3	pseudo_transcript_0	0.153202	0.116517	1	1	pseudo_transcript_0	0.86186	0.0646355	2	2	pseudo_transcript_0	0.137744	1.43176	1	1
pseudo_14330	pseudo_transcript_1	0.676257	0.00197542	3	3	pseudo_transcript_1	0.181728	-0.118267	2	2	pseudo_transcript_0	0.169322	0.0893457	1	1	pseudo_transcript_0	0.573359	-0.0750554	6	6	pseudo_transcript_1	0.119494	0.202931	1	1	pseudo_transcript_0	0.153202	0.116517	1	1	pseudo_transcript_1	0.0759665	1.07891	3	3	pseudo_transcript_0	0.137744	1.43176	1	1	pseudo_transcript_1	0.541546	0.356278	1	1
pseudo_17609	pseudo_transcript_0	0.300736	0.114552	4	4	pseudo_transcript_0	0.866679	-0.0127194	5	5	pseudo_transcript_0	0.856429	0.0141111	2	2	pseudo_transcript_0	0.461183	-0.0439597	4	4	pseudo_transcript_0	0.1987	0.115374	4	4	pseudo_transcript_0	0.153202	0.116517	1	1	pseudo_transcript_0	0.31884	0.820144	2	2	pseudo_transcript_0	0.0502194	1.41399	4	4	pseudo_transcript_0	0.125704	1.23295	1	1
OR51V1	ENST00000321255.1	0.584026	0.0134174	4	4	ENST00000321255.1	0.603522	-0.067532	4	4	ENST00000321255.1	0.532047	0.0315064	2	2	ENST00000321255.1	0.238428	0.0893899	7	7	ENST00000321255.1	0.460665	0.0945538	5	5	ENST00000321255.1	0.0208528	0.116516	4	4	ENST00000321255.1	0.26239	0.973157	3	3	ENST00000321255.1	0.132967	1.46579	1	1
pseudo_7883	pseudo_transcript_0	0.600411	0.0465683	5	5	pseudo_transcript_0	0.056284	-0.107259	4	4	pseudo_transcript_0	0.198855	-0.0367299	3	3	pseudo_transcript_0	0.311968	0.0305887	6	6	pseudo_transcript_0	0.0145313	0.150318	5	5	pseudo_transcript_0	0.0526548	0.116443	4	4	pseudo_transcript_0	0.30059	0.846677	6	6	pseudo_transcript_0	0.813982	0.173139	5	5	pseudo_transcript_0	0.84148	0.120537	3	3
pseudo_6282	pseudo_transcript_0	0.332114	0.06342	6	6	pseudo_transcript_0	0.0630356	0.120642	5	5	pseudo_transcript_0	0.427739	0.0368369	4	4	pseudo_transcript_0	0.225263	-0.0339248	8	8	pseudo_transcript_1	0.0853169	0.217824	6	6	pseudo_transcript_1	0.069536	0.116422	4	4	pseudo_transcript_1	0.773033	0.0920505	7	7	pseudo_transcript_1	0.543939	1.02151	5	5	pseudo_transcript_0	0.408232	-0.332936	2	2
PATL1	P1P2	0.151748	0.108083	2	2	P1P2	0.849719	-0.112192	5	5	P1P2	0.131637	-0.0580077	2	2	P1P2	0.438216	0.0283126	4	4	P1P2	0.536513	0.125617	4	4	P1P2	0.0292319	0.116394	3	3	P1P2	0.408287	0.625062	3	3	P1P2	0.608359	0.214981	3	3	P1P2	0.108116	0.77321	2	2
pseudo_6941	pseudo_transcript_0	0.128209	0.0941877	4	4	pseudo_transcript_0	0.582832	-0.0340572	2	2	pseudo_transcript_0	0.265935	0.0502896	2	2	pseudo_transcript_0	0.277065	0.0550994	5	5	pseudo_transcript_0	0.141024	0.110848	8	8	pseudo_transcript_0	0.0828446	0.116284	5	5	pseudo_transcript_0	0.183273	0.46228	7	7	pseudo_transcript_0	0.535575	-0.475188	2	2	pseudo_transcript_0	0.298742	0.424304	2	2
pseudo_16370	pseudo_transcript_0	0.341446	-0.0573539	4	4	pseudo_transcript_0	0.40189	-0.0527686	2	2	pseudo_transcript_0	0.068254	-0.0822053	2	2	pseudo_transcript_0	0.502881	0.047787	3	3	pseudo_transcript_0	0.708157	0.0386857	3	3	pseudo_transcript_0	0.108402	0.116273	2	2	pseudo_transcript_0	0.474918	-0.185505	5	5	pseudo_transcript_0	0.511585	0.209519	5	5	pseudo_transcript_0	0.714781	0.188385	4	4
pseudo_7962	pseudo_transcript_0	0.062008	0.124495	5	5	pseudo_transcript_0	0.429392	-0.0289752	7	7	pseudo_transcript_1	0.180458	-0.0473247	5	5	pseudo_transcript_1	0.129703	0.134264	7	7	pseudo_transcript_0	0.146796	0.169465	7	7	pseudo_transcript_1	0.0670709	0.116241	4	4	pseudo_transcript_1	0.318971	0.501821	6	6	pseudo_transcript_0	0.207552	0.775811	5	5	pseudo_transcript_1	0.61088	0.249698	2	2
pseudo_15797	pseudo_transcript_0	0.392506	-0.07497	5	5	pseudo_transcript_0	0.293632	-0.0204409	7	7	pseudo_transcript_0	0.396252	-0.0662315	5	5	pseudo_transcript_0	0.907764	0.140465	6	6	pseudo_transcript_0	0.716534	0.0842086	6	6	pseudo_transcript_0	0.0400483	0.116132	5	5	pseudo_transcript_0	0.708038	0.644966	8	8	pseudo_transcript_0	0.800697	-0.310784	6	6	pseudo_transcript_0	0.983533	0.288213	6	6
pseudo_9634	pseudo_transcript_0	0.743801	0.0171504	3	3	pseudo_transcript_0	0.555819	-0.0247697	4	4	pseudo_transcript_0	0.273732	-0.0373622	2	2	pseudo_transcript_0	0.14409	0.104407	4	4	pseudo_transcript_0	0.213776	0.157641	5	5	pseudo_transcript_0	0.0197203	0.116119	3	3	pseudo_transcript_0	0.0304189	1.7774	6	6	pseudo_transcript_0	0.805061	-0.171656	3	3	pseudo_transcript_0	0.138997	0.572925	3	3
NIPA1	P1P2	0.14724	0.143521	1	1	P1P2	0.771394	-0.0181642	2	2	P1P2	0.501736	0.0429435	1	1	P1P2	0.76098	-0.0629901	2	2	P1P2	0.272786	0.0786467	2	2	P1P2	0.154485	0.11608	1	1	P1P2	0.097256	2.22725	1	1	P1P2	0.987496	-0.0489288	2	2	P1P2	0.107319	1.40016	1	1
C15orf32	P1P2	0.178412	0.0808313	4	4	P1P2	0.116103	-0.0969699	3	3	P1P2	0.337812	-0.0287292	2	2	P1P2	0.335923	-0.0289755	4	4	P1P2	0.0203529	0.305206	2	2	P1P2	0.0673208	0.116043	2	2	P1P2	0.243771	0.541815	3	3	P1P2	0.197418	0.838001	3	3	P1P2	0.158857	0.778078	2	2
HSD3B2	P1P2	0.132165	-0.107098	5	5	P1P2	0.610429	0.0521989	4	4	P1P2	0.919017	0.011351	1	1	P1P2	0.258197	0.0541888	3	3	P1P2	0.00719072	0.188672	6	6	P1P2	0.0440263	0.116023	2	2	P1P2	0.9723	-0.254767	5	5	P1P2	0.651462	-0.470907	2	2	P1P2	0.844328	0.0870708	2	2
RAB40A	P1P2	0.527768	0.00861489	5	5	P1P2	0.1945	-0.1259	5	5	P1P2	0.329888	-0.0162149	4	4	P1P2	0.0859936	0.13392	6	6	P1P2	0.269749	0.0981112	6	6	P1P2	0.0335308	0.116016	4	4	P1P2	0.0157517	1.07242	4	4	P1P2	0.927145	-0.251759	5	5	P1P2	0.130164	0.592563	3	3
pseudo_14392	pseudo_transcript_0	0.338389	-0.11912	5	5	pseudo_transcript_0	0.749303	0.0553959	5	5	pseudo_transcript_0	0.787784	0.0194244	4	4	pseudo_transcript_0	0.46984	0.0470283	6	6	pseudo_transcript_0	0.0270517	0.215591	5	5	pseudo_transcript_0	0.0575293	0.115996	4	4	pseudo_transcript_0	0.919861	0.175544	5	5	pseudo_transcript_0	0.001509	1.98875	5	5	pseudo_transcript_0	0.0336852	1.25869	5	5
CYP26B1	P1	0.199432	0.086283	3	3	P1	0.385422	-0.054055	4	4	P2	0.192704	-0.0411202	3	3	P1	0.471243	0.0369945	3	3	P2	0.245003	-0.0825635	4	4	P1	0.154485	0.115925	1	1	P2	0.4966	-0.0347354	7	7	P1	0.709448	0.182608	4	4	P1	0.157007	0.639554	3	3
pseudo_9292	pseudo_transcript_0	0.0967254	0.104891	4	4	pseudo_transcript_0	0.597347	-0.026785	3	3	pseudo_transcript_0	0.516998	0.0308944	2	2	pseudo_transcript_0	0.531723	0.0436292	7	7	pseudo_transcript_0	0.172655	0.159964	5	5	pseudo_transcript_0	0.0832638	0.115872	4	4	pseudo_transcript_0	0.123924	0.898225	5	5	pseudo_transcript_0	0.254931	0.623415	3	3	pseudo_transcript_0	0.218105	0.76082	3	3
pseudo_7619	pseudo_transcript_0	0.421906	-0.0473758	4	4	pseudo_transcript_0	0.70271	-0.0244604	6	6	pseudo_transcript_0	0.576008	-0.0399452	4	4	pseudo_transcript_0	0.00945845	0.166203	5	5	pseudo_transcript_0	0.749511	-0.0650952	7	7	pseudo_transcript_0	0.0812158	0.115845	5	5	pseudo_transcript_0	0.131379	0.955651	5	5	pseudo_transcript_0	0.388963	-0.00403679	6	6	pseudo_transcript_0	0.134702	0.168403	5	5
TPK1	P1P2	0.500682	-0.0350765	2	2	P1P2	0.0565478	-0.10779	3	3						P1P2	0.813302	-0.00113021	4	4	P1P2	0.388383	-0.0489883	4	4	P1P2	0.154485	0.115843	1	1	P1P2	0.942155	-0.050999	2	2	P1P2	0.419016	-0.777606	3	3
DST	ENST00000370754.5	0.686727	0.00136891	4	4	ENST00000361203.3,ENST00000370769.4	0.533218	-0.00217639	4	4	ENST00000370754.5	0.603585	0.0330474	1	1	ENST00000361203.3,ENST00000370769.4	0.12789	0.150536	4	4	ENST00000370754.5	0.329659	0.0554651	6	6	ENST00000361203.3,ENST00000370769.4	0.0443134	0.115833	3	3	ENST00000361203.3,ENST00000370769.4	0.106839	0.976223	4	4	ENST00000370754.5	0.0185332	1.2606	4	4	ENST00000361203.3,ENST00000370769.4	0.0606819	0.95623	4	4
PCDHB14	P1P2	0.486217	-0.0155498	5	5	P1P2	0.838042	-0.0892816	7	7	P1P2	0.3798	-0.037261	4	4	P1P2	0.030547	0.116829	4	4	P1P2	0.691185	0.0679446	4	4	P1P2	0.0808549	0.115782	2	2	P1P2	0.531546	0.273011	3	3	P1P2	0.357353	0.537829	4	4
BRWD3	P1P2	0.0339276	-0.149473	4	4	P1P2	0.256417	-0.0793581	5	5	P1P2	0.0274372	-0.0896122	3	3	P1P2	0.129278	0.0784447	5	5	P1P2	0.256924	0.065946	3	3	P1P2	0.0416621	0.115771	2	2	P1P2	0.490465	0.562616	5	5	P1P2	0.223287	0.71213	2	2	P1P2	0.291588	0.6332	1	1
pseudo_12123	pseudo_transcript_0	0.151664	-0.0726151	4	4	pseudo_transcript_0	0.53366	-0.0434255	5	5	pseudo_transcript_0	0.18185	-0.03471	3	3	pseudo_transcript_1	0.374801	0.105238	6	6	pseudo_transcript_1	0.0844068	0.108231	3	3	pseudo_transcript_1	0.0159412	0.115769	3	3	pseudo_transcript_0	0.388186	-0.799711	6	6	pseudo_transcript_0	0.323072	-0.7106	4	4	pseudo_transcript_1	0.129051	0.721079	2	2
pseudo_14362	pseudo_transcript_0	0.587715	0.0571664	6	6	pseudo_transcript_0	0.537928	-0.0469008	6	6	pseudo_transcript_0	0.848989	-0.000975197	5	5	pseudo_transcript_0	0.457586	0.0138535	7	7	pseudo_transcript_0	0.496206	0.0598963	6	6	pseudo_transcript_0	0.0447554	0.115743	5	5	pseudo_transcript_0	0.892706	0.966589	6	6	pseudo_transcript_0	0.0579325	0.905071	4	4	pseudo_transcript_0	0.0608121	1.01016	3	3
GFRA1	P1P2	0.948707	-0.00858115	3	3	P1P2	0.309852	-0.0936356	6	6	P1P2	0.0886389	-0.0600461	3	3	P1P2	0.475002	0.0562838	4	4	P1P2	0.0217801	0.189113	6	6	P1P2	0.0482436	0.115663	3	3	P1P2	0.584866	0.345344	3	3	P1P2	0.108854	0.655153	5	5	P1P2	0.258549	0.425946	3	3
FAM92B	P1P2	0.340438	-0.058279	4	4	P1P2	0.0628403	-0.161699	7	7	P1P2	0.0659523	-0.0720882	3	3	P1P2	0.509681	0.014816	5	5	P1P2	0.0775231	0.136953	3	3	P1P2	0.0435882	0.115653	2	2	P1P2	0.957556	-0.35878	6	6	P1P2	0.237467	0.580251	3	3	P1P2	0.0593778	0.657445	3	3
pseudo_15627	pseudo_transcript_0	0.00675429	0.119457	6	6	pseudo_transcript_1	0.078463	-0.0836005	3	3	pseudo_transcript_0	0.646897	0.0235002	2	2	pseudo_transcript_1	0.173773	0.0742384	5	5	pseudo_transcript_1	0.54665	0.125534	5	5	pseudo_transcript_1	0.0548599	0.115634	4	4	pseudo_transcript_0	0.349542	0.136676	4	4	pseudo_transcript_0	0.265441	0.685415	3	3	pseudo_transcript_1	0.223656	0.929104	2	2
TCEB3C	ENST00000330682.2	0.612109	-0.0510159	10	10	ENST00000330682.2	0.914446	-0.086845	9	9	ENST00000330682.2	0.67312	-0.0402468	9	9	ENST00000330682.2	0.476236	0.0369639	10	10	ENST00000330682.2	0.440398	0.192475	10	10	ENST00000330682.2	0.240073	0.115548	10	10	ENST00000330682.2	0.938614	-0.319943	10	10	ENST00000330682.2	0.868148	0.459721	9	9	ENST00000330682.2	0.99141	-0.0381691	9	9
TCEB3CL	ENST00000451265.1	0.612109	-0.0510159	10	10	ENST00000451265.1	0.914446	-0.086845	9	9	ENST00000451265.1	0.67312	-0.0402468	9	9	ENST00000451265.1	0.476236	0.0369639	10	10	ENST00000451265.1	0.440398	0.192475	10	10	ENST00000451265.1	0.240073	0.115548	10	10	ENST00000451265.1	0.938614	-0.319943	10	10	ENST00000451265.1	0.868148	0.459721	9	9	ENST00000451265.1	0.99141	-0.0381691	9	9
TCEB3CL2	ENST00000591973.2	0.612109	-0.0510159	10	10	ENST00000591973.2	0.914446	-0.086845	9	9	ENST00000591973.2	0.67312	-0.0402468	9	9	ENST00000591973.2	0.476236	0.0369639	10	10	ENST00000591973.2	0.440398	0.192475	10	10	ENST00000591973.2	0.240073	0.115548	10	10	ENST00000591973.2	0.938614	-0.319943	10	10	ENST00000591973.2	0.868148	0.459721	9	9	ENST00000591973.2	0.99141	-0.0381691	9	9
CHCHD1	P1P2	0.0414955	-0.139876	2	2	P1P2	0.431295	-0.0563976	2	2	P1P2	0.0963004	-0.150379	1	1	P1P2	0.613058	0.041311	2	2	P1P2	0.173863	0.12083	3	3	P1P2	0.148699	0.115545	2	2	P1P2	0.603977	-0.220134	3	3	P1P2	0.126366	1.52507	1	1	P1P2	0.394309	0.477462	1	1
DRAM1	P1P2	0.739768	-0.00802646	5	5	P1P2	0.812533	0.0115297	3	3	P1P2	0.416003	-0.0367989	1	1	P1P2	0.770538	-0.0230761	6	6	P1P2	0.0112599	0.140722	8	8	P1P2	0.168242	0.115522	5	5	P1P2	0.480784	0.0572749	7	7	P1P2	0.283951	0.999236	3	3	P1P2	0.714746	0.364174	2	2
pseudo_16478	pseudo_transcript_0	0.335351	-0.0664602	7	7	pseudo_transcript_0	0.218592	-0.115655	4	4	pseudo_transcript_0	0.466766	-0.0779684	3	3	pseudo_transcript_0	0.0475081	0.128948	4	4	pseudo_transcript_0	0.63349	0.101921	6	6	pseudo_transcript_0	0.0517386	0.115435	3	3	pseudo_transcript_0	0.692254	0.543374	4	4	pseudo_transcript_0	0.483128	-0.393959	3	3	pseudo_transcript_0	0.950856	0.0113133	2	2
DCAF8	P1	0.0165458	-0.180633	7	7	P1	0.317903	-0.200809	7	7	P1	0.0151058	-0.160795	7	7	P1	0.00293912	0.241625	7	7	P1	0.598119	0.110673	9	9	P1	0.101355	0.115434	7	7	P2	0.544451	-0.263694	3	3	P1	0.0227564	-1.64643	8	8	P1	0.148939	-0.459758	8	8
PEX19	P1P2	0.0165458	-0.180633	7	7	P1P2	0.317903	-0.200809	7	7	P1P2	0.0151058	-0.160795	7	7	P1P2	0.00293912	0.241625	7	7	P1P2	0.598119	0.110673	9	9	P1P2	0.101355	0.115434	7	7	P1P2	0.7307	-1.4901	10	10	P1P2	0.0227564	-1.64643	8	8	P1P2	0.148939	-0.459758	8	8
CPQ	P1P2	0.100907	-0.186582	1	1	P1P2	0.103229	0.113003	4	4						P1P2	0.268325	0.0864188	4	4	P1P2	0.279429	0.09327	2	2	P1P2	0.154485	0.115424	1	1	P1P2	0.0416758	1.00594	4	4	P1P2	0.347906	0.691671	4	4	P1P2	0.559658	0.25951	2	2
pseudo_17620	pseudo_transcript_0	0.660749	-0.0464217	5	5	pseudo_transcript_0	0.0268929	-0.138203	3	3	pseudo_transcript_0	0.200799	-0.0526371	2	2	pseudo_transcript_0	0.629947	0.049431	4	4	pseudo_transcript_0	0.0125524	0.218793	7	7	pseudo_transcript_0	0.0313863	0.115397	3	3	pseudo_transcript_0	0.722738	-0.175783	5	5	pseudo_transcript_0	0.729814	0.168747	3	3	pseudo_transcript_0	0.604864	-0.182549	2	2
pseudo_5009	pseudo_transcript_0	0.180947	-0.112033	8	8	pseudo_transcript_0	0.197045	-0.0888995	5	5	pseudo_transcript_0	0.0706577	-0.0900199	5	5	pseudo_transcript_0	0.114	0.0671877	6	6	pseudo_transcript_0	0.04257	0.146101	4	4	pseudo_transcript_0	0.0252465	0.115385	3	3	pseudo_transcript_0	0.670631	-0.904601	7	7	pseudo_transcript_0	0.747399	-0.262544	5	5	pseudo_transcript_0	0.548505	0.214143	3	3
SMIM3	P1P2	0.184187	-0.0866657	3	3	P1P2	0.240495	0.0498813	3	3	P1P2	0.766923	0.0179399	2	2	P1P2	0.110595	0.0814374	3	3	P1P2	0.15693	0.130786	5	5	P1P2	0.154485	0.115324	1	1	P1P2	0.371327	-0.487379	2	2	P1P2	0.477195	0.5537	1	1
MYF6	P1P2	0.299312	-0.0425092	3	3	P1P2	0.99765	-0.0293569	5	5	P1P2	0.872573	0.0122034	2	2	P1P2	0.0512971	0.137373	3	3	P1P2	0.836265	0.022873	6	6	P1P2	0.0576113	0.115288	2	2	P1P2	0.0366914	1.18744	7	7	P1P2	0.638109	0.449882	6	6	P1P2	0.141188	0.934467	5	5
pseudo_6100	pseudo_transcript_0	0.290896	0.0947944	8	8	pseudo_transcript_0	0.520668	-0.0741017	4	4	pseudo_transcript_0	0.558318	0.0239445	3	3	pseudo_transcript_0	0.192276	0.104913	6	6	pseudo_transcript_0	0.236783	0.16822	7	7	pseudo_transcript_0	0.0458945	0.11515	5	5	pseudo_transcript_0	0.102399	1.29143	5	5	pseudo_transcript_0	0.887506	-0.178528	3	3	pseudo_transcript_0	0.0642591	0.956625	2	2
DCTD	P1P2	0.0517174	-0.14407	8	8	P1P2	0.307013	-0.0951143	5	5	P1P2	0.0124601	-0.119592	4	4	P1P2	0.0102318	0.165921	7	7	P1P2	0.40032	0.0858541	7	7	P1P2	0.0317947	0.115141	6	6	P1P2	0.605134	0.87699	9	9	P1P2	0.72649	-0.270398	4	4	P1P2	0.645086	-0.15891	4	4
PIK3IP1	P2	0.0827664	0.166491	7	7	P2	0.79683	-0.000477802	3	3	P1	0.542202	-0.0155855	2	2	P1	0.42055	-0.0148757	7	7	P2	0.287071	0.0739762	2	2	P1	0.154485	0.115052	1	1	P1	0.609577	-0.601562	6	6	P1	0.43083	0.624838	1	1	P1	0.228308	0.7503	1	1
NETO2	P1P2	0.988085	-0.00484642	3	3	P1P2	0.253504	-0.0982598	1	1						P1P2	0.67873	0.0244155	4	4	P1P2	0.311462	0.070595	2	2	P1P2	0.154485	0.115028	1	1	P1P2	0.512114	0.11226	3	3	P1P2	0.972948	-0.0318799	1	1
pseudo_7046	pseudo_transcript_1	0.0119682	-0.161529	7	7	pseudo_transcript_1	0.745956	-0.0670034	5	5	pseudo_transcript_1	0.0207971	-0.119475	5	5	pseudo_transcript_0	0.00238664	0.164421	7	7	pseudo_transcript_0	0.27553	0.0997754	6	6	pseudo_transcript_0	0.0140628	0.115016	4	4	pseudo_transcript_1	0.126159	-0.707505	4	4	pseudo_transcript_0	0.306723	0.521495	5	5	pseudo_transcript_0	0.0711243	0.62079	3	3
pseudo_4085	pseudo_transcript_0	0.226651	-0.100582	5	5	pseudo_transcript_0	0.011137	-0.180693	3	3	pseudo_transcript_0	0.0304154	-0.181717	2	2	pseudo_transcript_0	0.0916318	0.0326427	7	7	pseudo_transcript_0	0.228942	0.039608	5	5	pseudo_transcript_0	0.0336042	0.115006	3	3	pseudo_transcript_0	0.623365	-0.373722	3	3	pseudo_transcript_0	0.89293	0.0646687	2	2	pseudo_transcript_0	0.225967	-0.820997	1	1
ZDHHC7	P1P2	0.805011	0.02021	1	1	P1P2	0.950925	0.00377855	1	1	P1P2	0.916135	0.0119943	1	1	P1P2	0.865799	-0.0114216	2	2	P1P2	0.313345	0.0858612	2	2	P1P2	0.154485	0.114993	1	1						P1P2	0.88592	0.101329	1	1
pseudo_13129	pseudo_transcript_0	0.664974	0.124859	7	7	pseudo_transcript_0	0.068213	-0.144645	5	5	pseudo_transcript_0	0.855443	0.0132683	4	4	pseudo_transcript_0	0.890106	0.0246708	8	8	pseudo_transcript_0	0.00420024	0.22468	7	7	pseudo_transcript_0	0.0370692	0.114991	5	5	pseudo_transcript_0	0.151638	1.00162	9	9	pseudo_transcript_0	0.875507	0.195698	5	5	pseudo_transcript_0	0.139484	0.688476	5	5
SSTR5	P2	0.496427	-0.0222005	6	6	P2	0.152038	-0.102624	5	5	P2	0.0409689	-0.0985101	4	4	P2	0.0792697	0.130726	7	7	P1	0.139817	0.0862705	3	3	P2	0.167834	0.114983	5	5	P2	0.402366	0.852249	7	7	P1	0.127994	1.10917	2	2	P1	0.333309	0.729743	2	2
pseudo_3553	pseudo_transcript_0	0.186177	-0.104192	5	5	pseudo_transcript_0	0.111076	-0.111598	5	5	pseudo_transcript_0	0.0354616	-0.105473	2	2	pseudo_transcript_0	0.517745	-0.0497429	7	7	pseudo_transcript_0	0.0444707	0.143791	3	3	pseudo_transcript_0	0.0438068	0.114915	2	2	pseudo_transcript_0	0.0645864	-0.81772	6	6	pseudo_transcript_0	0.294896	0.652093	4	4	pseudo_transcript_0	0.939447	-0.0208776	2	2
E2F7	P1P2	0.623764	-0.0253884	3	3	P1P2	0.30054	-0.0854558	1	1	P1P2	0.152526	-0.0971233	1	1	P1P2	0.778631	0.0193962	3	3	P1P2	0.0347726	0.181858	5	5	P1P2	0.0449136	0.114877	2	2	P1P2	0.387428	0.490054	3	3
pseudo_15948	pseudo_transcript_0	0.184116	-0.0936183	6	6	pseudo_transcript_0	0.314748	-0.0267532	5	5	pseudo_transcript_0	0.212009	-0.0761178	4	4	pseudo_transcript_0	0.372424	0.116197	4	4	pseudo_transcript_0	0.0604589	0.15872	4	4	pseudo_transcript_0	0.0179075	0.114845	3	3	pseudo_transcript_0	0.16772	1.80593	4	4	pseudo_transcript_0	0.716844	0.21891	3	3	pseudo_transcript_0	0.131655	1.03108	3	3
pseudo_4699	pseudo_transcript_0	0.103445	-0.105016	3	3	pseudo_transcript_1	0.0317507	0.131926	6	6	pseudo_transcript_0	0.0966643	-0.147766	1	1	pseudo_transcript_0	0.0853736	0.313119	1	1	pseudo_transcript_0	0.337631	-0.0510013	4	4	pseudo_transcript_0	0.155776	0.114831	1	1	pseudo_transcript_1	0.407882	-0.194723	7	7	pseudo_transcript_0	0.0819239	-1.34013	2	2	pseudo_transcript_0	0.139482	-0.680755	2	2
TMEM35	P1P2	0.0980447	-0.195898	1	1	P1P2	0.017627	0.175703	2	2	P1P2	0.676254	-0.0137977	1	1	P1P2	0.113581	0.178578	1	1	P1P2	0.366119	0.063598	5	5	P1P2	0.156208	0.11483	1	1	P1P2	0.788816	-0.153406	4	4	P1P2	0.0154422	2.18249	2	2	P1P2	0.0307751	1.26273	2	2
DEAF1	P1P2	0.742119	0.00222615	5	5	P1P2	0.50091	-0.0304398	4	4	P1P2	0.403378	-0.0314957	3	3	P1P2	0.598914	0.0913728	6	6	P1P2	0.542734	0.0818998	6	6	P1P2	0.293324	0.114809	6	6	P1P2	0.722836	-0.106959	6	6	P1P2	0.532022	-0.403238	5	5	P1P2	0.388977	-0.385694	4	4
TUBB2A	P1P2	0.0040338	-0.145573	6	6	P1P2	0.79004	-0.0119178	4	4	P1P2	0.124562	-0.0645576	2	2	P1P2	0.0368702	0.194258	8	8	P1P2	0.903969	-0.015895	7	7	P1P2	0.013994	0.114803	5	5	P1P2	0.494222	-0.547483	7	7	P1P2	0.544201	-0.433609	3	3	P1P2	0.254509	-0.726704	2	2
CLEC1B	P1P2	0.872229	0.00943129	3	3	P1P2	0.00622458	-0.156197	6	6	P1P2	0.144368	-0.0992236	1	1	P1P2	0.864953	0.0369107	5	5	P1P2	0.0547356	0.168635	5	5	P1P2	0.133978	0.114787	2	2	P1P2	0.923396	-0.145332	5	5	P1P2	0.782434	0.275627	3	3
SLX4IP	P1P2	0.537171	-0.00400953	7	7	P1P2	0.742636	-0.0197234	7	7	P1P2	0.639815	-0.0159769	6	6	P1P2	0.564145	0.0307769	7	7	P1P2	0.283123	0.118711	8	8	P1P2	0.0536454	0.114763	6	6	P1P2	0.583268	-0.910271	7	7	P1P2	0.0576875	0.799444	7	7	P1P2	0.230998	0.0703339	7	7
pseudo_17772	pseudo_transcript_0	0.569546	0.0370546	5	5	pseudo_transcript_0	0.374695	-0.0617116	4	4	pseudo_transcript_0	0.466587	-0.0312722	1	1	pseudo_transcript_0	0.104208	0.0795466	4	4	pseudo_transcript_0	0.291878	0.071291	3	3	pseudo_transcript_0	0.0446904	0.114741	2	2	pseudo_transcript_0	0.182607	0.935629	4	4	pseudo_transcript_0	0.321663	0.682861	2	2
MAGEE1	P1P2	0.957091	-0.0023298	5	5	P1P2	0.855806	0.0279025	4	4	P1P2	0.544249	-0.0244236	1	1	P1P2	0.416303	0.0800306	6	6	P1P2	0.595592	0.0562745	5	5	P1P2	0.084323	0.114662	4	4	P1P2	0.539966	0.287296	4	4	P1P2	0.475272	0.982163	4	4	P1P2	0.413124	0.567024	2	2
HNRNPF	P2	0.0490605	0.133096	5	5	P2	0.795965	-0.00799404	4	4	P2	0.402833	0.0445339	4	4	P1	0.0278367	0.133182	8	8	P1	0.031236	0.141886	5	5	P1	0.00659324	0.114601	5	5	P2	0.0461879	1.58298	7	7	P1	0.0177133	1.49105	5	5	P1	0.0593045	0.593472	4	4
FAM206A	P1P2	0.203154	-0.0844639	5	5	P1P2	0.63712	0.0555261	5	5	P1P2	0.856865	0.012088	4	4	P1P2	0.00777204	0.163337	6	6	P1P2	0.170708	0.127949	5	5	P1P2	0.0644642	0.1146	4	4	P1P2	0.25315	0.451881	7	7	P1P2	0.28429	0.485019	3	3	P1P2	0.274657	0.363109	3	3
pseudo_6195	pseudo_transcript_0	0.25433	0.140558	6	6	pseudo_transcript_0	0.59851	0.0343296	7	7	pseudo_transcript_0	0.0782931	0.143545	5	5	pseudo_transcript_0	0.975933	0.0459582	10	10	pseudo_transcript_0	0.264348	0.0590427	8	8	pseudo_transcript_0	0.213279	0.1146	8	8	pseudo_transcript_0	0.539301	0.761493	6	6	pseudo_transcript_0	0.108726	1.05937	5	5	pseudo_transcript_0	0.0760179	1.00355	3	3
pseudo_3579	pseudo_transcript_0	0.335034	-0.00394745	5	5	pseudo_transcript_0	0.0661296	-0.129667	6	6	pseudo_transcript_0	0.372954	-0.0546749	4	4	pseudo_transcript_0	0.135391	0.115419	5	5	pseudo_transcript_0	0.0379705	0.206101	7	7	pseudo_transcript_0	0.0324367	0.114571	4	4	pseudo_transcript_0	0.498764	0.665556	6	6	pseudo_transcript_0	0.666906	0.536483	5	5	pseudo_transcript_0	0.776059	0.400072	4	4
TSTD2	P1P2	0.847669	0.0318387	5	5	P1P2	0.889968	-0.056517	4	4	P1P2	0.778995	-0.0132946	3	3	P1P2	0.0527613	0.165628	6	6	P1P2	0.856756	0.0584018	5	5	P1P2	0.0321341	0.114531	3	3	P1P2	0.0371834	1.77443	6	6	P1P2	0.32563	0.521571	4	4	P1P2	0.171912	0.599689	3	3
CPSF3	P1P2	0.0138905	-0.113305	4	4	P1P2	0.229254	-0.0515512	4	4	P1P2	0.332664	-0.0450746	2	2	P1P2	0.353876	0.0503073	4	4	P1P2	0.0971359	0.178739	4	4	P1P2	0.0215451	0.114523	3	3	P1P2	0.517814	-0.33778	4	4	P1P2	0.160302	1.07716	2	2	P1P2	0.197081	0.840842	1	1
AVIL	P1P2	0.968663	0.00938017	4	4	P1P2	0.238721	0.0528001	3	3	P1P2	0.998976	0.00773118	2	2	P1P2	0.142601	0.120867	5	5	P1P2	0.086154	0.108629	3	3	P1P2	0.0451378	0.114519	2	2	P1P2	0.960944	-0.00452977	5	5	P1P2	0.146965	1.39255	1	1	P1P2	0.231456	0.741331	1	1
pseudo_9576	pseudo_transcript_0	0.642164	-0.0651515	3	3	pseudo_transcript_0	0.0530282	-0.108351	3	3	pseudo_transcript_0	0.407887	-0.0738653	2	2	pseudo_transcript_0	0.6893	0.0931512	6	6	pseudo_transcript_0	0.545995	0.0867129	6	6	pseudo_transcript_0	0.205483	0.114512	5	5	pseudo_transcript_0	0.161761	1.48905	5	5	pseudo_transcript_0	0.697845	-0.0046539	4	4	pseudo_transcript_0	0.774457	0.24658	3	3
URM1	P1P2	0.873291	-0.0331732	6	6	P1P2	0.60966	0.0406946	4	4	P1P2	0.109304	0.122658	1	1	P1P2	0.260532	0.132756	7	7	P1P2	0.967451	-0.000786841	6	6	P1P2	0.0474643	0.114472	4	4	P1P2	0.29656	1.1735	7	7	P1P2	0.130045	0.885511	3	3	P1P2	0.100422	1.46366	1	1
EXOSC5	P1P2	0.118417	-0.119265	2	2	P1P2	0.0828734	-0.099039	4	4	P1P2	0.456645	-0.0334171	1	1	P1P2	0.10175	0.199156	1	1	P1P2	0.177286	-0.150395	4	4	P1P2	0.157075	0.114446	1	1	P1P2	0.544891	0.501659	5	5	P1P2	0.986472	-0.0148853	1	1	P1P2	0.293447	0.629062	1	1
C4orf32	P1P2	0.0960401	-0.199093	1	1	P1P2	0.940427	0.00479604	1	1						P1P2	0.454047	0.104523	2	2	P1P2	0.884883	0.0103431	2	2	P1P2	0.157075	0.114437	1	1	P1P2	0.440464	0.367938	2	2	P1P2	0.629041	0.267612	2	2	P1P2	0.363552	0.50995	1	1
ERMARD	P1P2	0.519279	-0.0386733	3	3	P1P2	0.118098	-0.182504	1	1	P1P2	0.0920181	-0.167395	1	1	P1P2	0.0696285	0.121678	2	2	P1P2	0.0396136	0.139897	3	3	P1P2	0.157075	0.114408	1	1	P1P2	0.0620165	1.1474	2	2	P1P2	0.916899	0.0784765	1	1
pseudo_14544	pseudo_transcript_0	0.0781881	0.110196	2	2	pseudo_transcript_0	0.087553	-0.121934	4	4						pseudo_transcript_0	0.644268	0.0523025	3	3	pseudo_transcript_0	0.0676586	0.135486	3	3	pseudo_transcript_0	0.042296	0.114393	2	2	pseudo_transcript_0	0.0644873	1.05414	5	5	pseudo_transcript_0	0.820162	0.116359	4	4	pseudo_transcript_0	0.550052	0.249516	2	2
ZNF823	P1P2	0.284286	-0.00719571	5	5	P1P2	0.837092	-0.0680781	6	6	P1P2	0.909686	-0.0291791	5	5	P1P2	0.0503418	0.147111	5	5	P1P2	0.91305	0.0845206	6	6	P1P2	0.0563415	0.114372	5	5	P1P2	0.0429045	1.47401	5	5	P1P2	0.717408	-0.214602	6	6	P1P2	0.597907	0.449994	4	4
pseudo_1479	pseudo_transcript_0	0.298683	-0.170964	7	7	pseudo_transcript_0	0.698727	-0.0497949	6	6	pseudo_transcript_0	0.268429	-0.117504	6	6	pseudo_transcript_0	0.518627	0.0392794	7	7	pseudo_transcript_0	0.148557	-0.000283175	7	7	pseudo_transcript_1	0.0467336	0.114343	2	2	pseudo_transcript_1	0.495602	0.258675	3	3	pseudo_transcript_1	0.0587381	1.05669	3	3	pseudo_transcript_0	0.0730054	-1.17754	4	4
NDUFA8	P1P2	0.807871	0.0171662	4	4	P1P2	0.503565	-0.0815167	2	2	P1P2	0.171772	-0.0610084	2	2	P1P2	0.250484	-0.0647752	2	2	P1P2	0.675814	-0.0253322	3	3	P1P2	0.157075	0.114343	1	1	P1P2	0.132501	-0.760591	3	3	P1P2	0.693665	0.293959	1	1	P1P2	0.893514	-0.0344748	1	1
pseudo_3957	pseudo_transcript_0	0.528558	-0.0451051	6	6	pseudo_transcript_0	0.524238	-0.0703274	4	4	pseudo_transcript_0	0.342641	-0.0374038	4	4	pseudo_transcript_0	0.0331764	0.157523	5	5	pseudo_transcript_0	0.418787	0.0109487	7	7	pseudo_transcript_0	0.011082	0.11432	5	5	pseudo_transcript_0	0.161095	0.842539	5	5	pseudo_transcript_0	0.879365	0.0235169	4	4	pseudo_transcript_0	0.329634	0.207948	4	4
pseudo_14410	pseudo_transcript_0	0.548627	0.0289348	7	7	pseudo_transcript_0	0.842344	0.010189	6	6	pseudo_transcript_0	0.695537	-0.0265862	5	5	pseudo_transcript_0	0.00795377	0.159069	7	7	pseudo_transcript_0	0.595522	0.0141991	6	6	pseudo_transcript_0	0.0157602	0.114255	5	5	pseudo_transcript_0	0.144292	1.37839	8	8	pseudo_transcript_0	0.225964	0.387915	5	5	pseudo_transcript_0	0.256857	0.437479	5	5
pseudo_419	pseudo_transcript_0	0.71313	-0.0325866	6	6	pseudo_transcript_0	0.425682	-0.0464099	9	9	pseudo_transcript_0	0.94401	-0.0660708	6	6	pseudo_transcript_0	0.0735081	0.045272	7	7	pseudo_transcript_0	0.826645	0.0876866	5	5	pseudo_transcript_0	0.0706809	0.114247	4	4	pseudo_transcript_0	0.119225	1.66899	6	6	pseudo_transcript_0	0.444451	0.371844	5	5	pseudo_transcript_0	0.161004	0.668379	5	5
IL26	P1P2	0.797168	0.0205129	5	5	P1P2	0.852065	-0.0167814	8	8	P1P2	0.256854	0.0554273	4	4	P1P2	0.98122	-0.00972427	6	6	P1P2	0.084906	0.214892	6	6	P1P2	0.0347896	0.114212	5	5	P1P2	0.889183	0.107324	5	5	P1P2	0.0197031	1.47077	5	5	P1P2	0.0535273	1.05646	2	2
E2F3	P1	0.0416163	0.099773	3	3	P1	0.647056	0.0254413	4	4	P1	0.144588	0.0717234	2	2	P1	0.0455689	0.147125	5	5	P2	0.607693	0.0303152	3	3	P1	0.0185211	0.114197	4	4	P1	0.117501	1.32976	6	6	P1	0.436107	-0.584942	3	3	P1	0.635201	0.362544	2	2
MED10	P1P2	0.450527	-0.0527652	1	1	P1P2	0.500596	-0.0371246	2	2						P1P2	0.665468	0.024808	2	2	P1P2	0.0403134	0.203567	2	2	P1P2	0.045589	0.114187	2	2	P1P2	0.39528	-0.610848	1	1	P1P2	0.487767	0.546362	1	1
MYD88	P2	0.0401593	-0.111936	5	5	P1	0.466246	-0.0389048	3	3	P2	0.329888	-0.0393329	4	4	P2	0.0363031	0.110601	4	4	P1	0.0857014	-0.142692	5	5	P2	0.0399136	0.114184	4	4	P1	0.849494	-0.0811712	3	3	P1	0.0502194	-1.56589	4	4	P1	0.281748	-0.502659	2	2
C1QC	P1P2	0.653355	-0.0198769	5	5	P1P2	0.178944	-0.11179	5	5	P1P2	0.466126	-0.0213745	3	3	P1P2	0.902636	0.00529765	3	3	P1P2	0.174489	0.151846	7	7	P1P2	0.0584429	0.114182	2	2	P1P2	0.261178	-0.710881	5	5	P1P2	0.367962	1.69555	6	6	P1P2	0.336181	0.516797	2	2
ZNF182	P1P2	0.610058	0.026035	8	8	P1P2	0.403178	0.0388425	5	5	P1P2	0.598474	-0.0218629	4	4	P1P2	0.334991	0.188164	7	7	P1P2	0.110922	0.175945	6	6	P1P2	0.0801497	0.114173	6	6	P1P2	0.193721	0.380856	6	6	P1P2	0.0109607	1.80194	5	5	P1P2	0.0168457	1.0313	4	4
LYPD6B	P1P2	0.816919	-0.0108351	2	2	P1P2	0.0186758	-0.130731	3	3						P1P2	0.0292299	0.166562	2	2	P1P2	0.398419	0.0560098	2	2	P1P2	0.157075	0.11417	1	1	P1P2	0.274724	0.819405	1	1	P1P2	0.280175	-1.11938	1	1
pseudo_16164	pseudo_transcript_0	0.133971	0.0852943	6	6	pseudo_transcript_0	0.762637	-0.0281377	8	8	pseudo_transcript_0	0.157395	0.065452	5	5	pseudo_transcript_0	0.78134	0.0395035	9	9	pseudo_transcript_0	0.0265801	0.207821	8	8	pseudo_transcript_0	0.202817	0.11416	7	7	pseudo_transcript_0	0.587566	0.304344	6	6	pseudo_transcript_0	0.0690805	1.42363	7	7	pseudo_transcript_0	0.221507	0.509681	5	5
RBM41	P1P2	0.375161	-0.0530379	3	3	P1P2	0.490491	-0.00711889	4	4	P1P2	0.535422	-0.0232139	2	2	P1P2	0.834515	0.00855708	6	6	P1P2	0.554667	0.0704883	5	5	P1P2	0.0410719	0.114123	4	4	P1P2	0.928198	-0.197608	4	4	P1P2	0.647939	0.252342	4	4	P1P2	0.588954	0.199481	3	3
TAF4	P1P2	0.915718	0.028942	5	5	P1P2	0.296598	-0.0734421	3	3	P1P2	0.135595	-0.104034	1	1	P1P2	0.344416	0.115382	5	5	P1P2	0.94455	-0.047531	5	5	P1P2	0.0755412	0.114111	2	2	P1P2	0.781393	0.536681	7	7	P1P2	0.30738	-0.918546	4	4	P1P2	0.100084	-0.60104	3	3
pseudo_8702	pseudo_transcript_0	0.285608	-0.114285	7	7	pseudo_transcript_0	0.521381	-0.0554515	4	4	pseudo_transcript_0	0.0287105	-0.079153	3	3	pseudo_transcript_0	0.466915	0.0420795	7	7	pseudo_transcript_0	0.0291228	0.211024	3	3	pseudo_transcript_0	0.0134435	0.114108	3	3	pseudo_transcript_0	0.0956931	-1.06719	6	6	pseudo_transcript_0	0.0543272	1.447	4	4	pseudo_transcript_0	0.946847	0.0464327	3	3
ACADVL	P1P2	0.642478	-0.0264709	6	6	P1P2	0.453966	0.0274575	4	4	P1P2	0.59622	-0.014432	3	3	P1P2	0.0309533	0.100088	7	7	P1P2	0.356381	0.0682361	6	6	P1P2	0.0646602	0.114096	6	6	P1P2	0.539838	0.441305	6	6	P1P2	0.581183	1.4038	6	6	P1P2	0.743232	0.222582	5	5
pseudo_2688	pseudo_transcript_0	0.43849	-0.0506828	2	2	pseudo_transcript_0	0.0470542	-0.148307	8	8	pseudo_transcript_0	0.228258	-0.054287	2	2	pseudo_transcript_0	0.163186	0.0827187	5	5	pseudo_transcript_0	0.0668806	0.237931	7	7	pseudo_transcript_0	0.0453629	0.114094	2	2	pseudo_transcript_0	0.767057	0.679358	4	4	pseudo_transcript_0	0.404731	-0.25922	7	7	pseudo_transcript_0	0.672862	-0.21209	3	3
ABHD12B	P1P2	0.725575	-0.029333	6	6	P1P2	0.332016	-0.0469022	4	4	P1P2	0.694722	-0.00951642	4	4	P1P2	0.734244	0.0320237	6	6	P1P2	0.150214	0.153184	6	6	P1P2	0.089225	0.114027	4	4	P1P2	0.852637	-0.0425203	7	7	P1P2	0.393924	0.63605	3	3	P1P2	0.481373	0.337313	3	3
NUP107						P1P2	0.317984	0.038889	4	4						P1P2	0.543354	0.0335394	2	2	P1P2	0.770882	0.0262446	4	4	P1P2	0.157075	0.113988	1	1						P1P2	0.1651	0.831947	4	4
pseudo_6689	pseudo_transcript_0	0.132966	0.104771	5	5	pseudo_transcript_0	0.314787	0.0389159	6	6	pseudo_transcript_0	0.157783	0.0656852	3	3	pseudo_transcript_0	0.129703	0.200583	7	7	pseudo_transcript_0	0.563466	-0.0156062	6	6	pseudo_transcript_0	0.227606	0.113975	5	5	pseudo_transcript_0	0.00576977	1.67652	6	6	pseudo_transcript_0	0.630158	0.245486	6	6	pseudo_transcript_0	0.102393	1.00453	5	5
pseudo_6230	pseudo_transcript_0	0.512932	0.000411	7	7	pseudo_transcript_0	0.361505	-0.0997268	6	6	pseudo_transcript_0	0.599734	0.0416542	4	4	pseudo_transcript_0	0.711293	0.0127877	3	3	pseudo_transcript_0	0.308467	0.0627784	5	5	pseudo_transcript_0	0.0741734	0.113901	2	2	pseudo_transcript_0	0.270998	0.487609	4	4	pseudo_transcript_0	0.802986	-0.099837	4	4	pseudo_transcript_0	0.084147	0.906728	2	2
ALAD	P1P2	0.424481	-0.0714913	2	2	P1P2	0.16849	-0.134813	1	1						P1P2	0.925346	0.00582185	3	3	P1P2	0.020071	0.255971	2	2	P1P2	0.157075	0.113898	1	1	P1P2	0.638726	-0.262196	4	4
MAMSTR	P2	0.280305	0.0685985	5	5	P1	0.435412	-0.0445146	3	3	P1	0.179963	0.0602868	2	2	P1	0.214021	0.159538	7	7	P1	0.175952	0.0874762	4	4	P1	0.0358139	0.113869	4	4	P1	0.140371	1.04903	3	3	P1	0.118979	0.91689	3	3	P1	0.0290431	1.43169	2	2
IP6K2	P1P2	0.563031	-0.0195146	4	4	P1P2	0.170801	-0.103594	2	2	P1P2	0.0976167	-0.0781729	2	2	P1P2	0.869339	-0.00584829	3	3	P1P2	0.0532045	0.163413	2	2	P1P2	0.157075	0.113805	1	1	P1P2	0.691125	0.189279	2	2	P1P2	0.457449	0.478797	2	2	P1P2	0.246004	0.712273	1	1
pseudo_8248	pseudo_transcript_1	0.437789	-0.0484263	5	5	pseudo_transcript_1	0.0445059	-0.119988	4	4	pseudo_transcript_1	0.261549	-0.0352544	2	2	pseudo_transcript_2	0.324044	0.0760968	5	5	pseudo_transcript_2	0.0463801	0.177493	6	6	pseudo_transcript_2	0.0428626	0.113751	4	4	pseudo_transcript_1	0.295872	-0.96854	6	6	pseudo_transcript_1	0.107346	-0.980025	3	3	pseudo_transcript_1	0.0401078	-0.974282	3	3
pseudo_10798	pseudo_transcript_0	0.408451	-0.046562	5	5	pseudo_transcript_0	0.646267	0.0450921	4	4	pseudo_transcript_0	0.0541073	0.0900757	2	2	pseudo_transcript_0	0.943774	-0.00351814	5	5	pseudo_transcript_0	0.355397	0.0949779	6	6	pseudo_transcript_0	0.0272059	0.113698	3	3	pseudo_transcript_0	0.376457	-0.662468	6	6	pseudo_transcript_0	0.530304	-0.433824	3	3	pseudo_transcript_0	0.810827	0.0968734	2	2
CD247	P1P2	0.977764	0.00247558	1	1	P1P2	0.484856	-0.0929925	5	5	P1P2	0.75483	-0.00950439	1	1	P1P2	0.189231	0.0631762	3	3	P1P2	0.0503734	0.215544	6	6	P1P2	0.0819787	0.113681	3	3	P1P2	0.87146	-0.119604	4	4	P1P2	0.719656	0.485822	4	4	P1P2	0.471236	-0.25712	3	3
NOS1AP	P1P2	0.755193	0.0622042	4	4	P1P2	0.321315	-0.0571911	3	3	P1P2	0.112557	-0.120754	1	1	P1P2	0.358581	0.0436149	5	5	P1P2	0.269172	0.145053	5	5	P1P2	0.0399136	0.113561	4	4	P1P2	0.546952	-0.332534	2	2	P1P2	0.670099	0.423693	4	4	P1P2	0.495579	0.396306	1	1
pseudo_4038	pseudo_transcript_0	0.0447831	-0.206054	6	6	pseudo_transcript_0	0.592077	-0.0035552	3	3	pseudo_transcript_0	0.676666	-0.0483337	2	2	pseudo_transcript_0	0.149874	0.170716	5	5	pseudo_transcript_0	0.139567	0.152564	4	4	pseudo_transcript_0	0.101249	0.113512	4	4	pseudo_transcript_0	0.15235	-1.01503	6	6	pseudo_transcript_0	0.137007	0.880293	2	2	pseudo_transcript_0	0.293441	0.425269	2	2
2018-09-06	P1P2	0.589252	-0.0211304	3	3	P1P2	0.131248	0.0598105	3	3	P1P2	0.513367	0.0423601	1	1	P1P2	0.102158	0.0990805	2	2	P1P2	0.405828	0.0128519	7	7	P1P2	0.0965192	0.113506	2	2	P1P2	0.746563	0.102928	3	3	P1P2	0.606255	0.234097	3	3	P1P2	0.925773	0.0396898	2	2
TMEM108	P1P2	0.91492	-0.00633316	3	3	P1P2	0.343632	-0.055154	2	2	P1P2	0.139442	-0.102107	1	1	P1P2	0.439948	0.0604904	2	2	P1P2	0.658698	0.024023	3	3	P1P2	0.157075	0.113504	1	1	P1P2	0.114071	0.89498	2	2	P1P2	0.667754	0.243055	5	5
pseudo_8113	pseudo_transcript_0	0.120216	-0.154844	1	1	pseudo_transcript_0	0.605478	-0.0351271	1	1	pseudo_transcript_0	0.156203	-0.0949853	1	1	pseudo_transcript_0	0.684566	-0.0327553	5	5	pseudo_transcript_0	0.103354	0.148042	4	4	pseudo_transcript_0	0.0685843	0.113457	2	2	pseudo_transcript_0	0.323345	-0.71947	1	1	pseudo_transcript_0	0.90449	-0.103018	1	1	pseudo_transcript_0	0.469032	-0.411244	1	1
IQCE	P1P2	0.866352	-0.000352541	3	3	P1P2	0.128228	0.0890186	2	2	P1P2	0.393484	0.0537425	1	1	P1P2	0.854456	-0.0328171	4	4	P1P2	0.736119	0.0391552	5	5	P1P2	0.157075	0.113424	1	1	P1P2	0.35874	-0.376415	3	3	P1P2	0.313185	-0.630481	2	2	P1P2	0.495579	-0.375108	1	1
MYBBP1A	P1P2	0.868658	0.0253022	2	2	P1P2	0.245821	-0.0796121	4	4	P1P2	0.726118	-0.034437	2	2	P1P2	0.42034	0.0439912	3	3	P1P2	0.884366	0.00765639	2	2	P1P2	0.157075	0.113418	1	1	P1P2	0.213261	-0.976324	4	4	P1P2	0.354299	-0.597268	4	4	P1P2	0.124771	-0.747913	2	2
pseudo_16108	pseudo_transcript_0	0.289272	0.0604959	4	4	pseudo_transcript_0	0.160881	-0.0830816	4	4	pseudo_transcript_0	0.97441	0.00608895	2	2	pseudo_transcript_0	0.378994	0.0423691	3	3	pseudo_transcript_0	0.0527312	0.177667	5	5	pseudo_transcript_0	0.0927982	0.113397	2	2	pseudo_transcript_0	0.282429	0.411037	4	4	pseudo_transcript_0	0.470954	0.399003	2	2	pseudo_transcript_0	0.602865	0.237018	2	2
UBA52	P1	0.226873	-0.0958952	1	1	P1	0.551397	0.0407999	1	1	P2	0.456608	-0.0283386	6	6	P2	0.066545	0.156513	8	8	P1	0.0427357	0.18413	2	2	P1	0.157075	0.113375	1	1	P2	0.775913	0.364628	7	7	P2	0.176184	-1.63448	7	7	P2	0.15109	-0.865877	6	6
CCDC97	P1P2	0.21793	-0.0682727	3	3	P1P2	0.873248	0.0289406	5	5	P1P2	0.542242	-0.0115868	3	3	P1P2	0.021917	0.16387	6	6	P1P2	0.0235964	0.193769	3	3	P1P2	0.0409938	0.113351	3	3	P1P2	0.725756	-0.143438	3	3	P1P2	0.0430137	1.31765	2	2	P1P2	0.195575	0.515647	2	2
pseudo_14051	pseudo_transcript_0	0.37702	-0.0454573	3	3	pseudo_transcript_0	0.000542968	-0.213678	7	7	pseudo_transcript_0	0.0135844	-0.111006	3	3	pseudo_transcript_0	0.91303	-0.0228017	5	5	pseudo_transcript_0	0.0118593	0.195519	5	5	pseudo_transcript_0	0.016016	0.113306	3	3	pseudo_transcript_0	0.265975	-0.58129	2	2	pseudo_transcript_0	0.954949	-0.356306	5	5	pseudo_transcript_0	0.797519	-0.11393	2	2
ZNF484	P1P2	0.345754	0.0490952	4	4	P1P2	0.50283	-0.0713504	5	5	P1P2	0.562798	0.0324408	2	2	P1P2	0.45136	0.0513408	2	2	P1P2	0.632216	0.0291169	3	3	P1P2	0.157075	0.113276	1	1	P1P2	0.353661	0.50507	4	4	P1P2	0.436708	-0.469535	4	4	P1P2	0.073425	0.811007	2	2
DPH1	P1	0.166526	0.0921975	4	4	P2	0.324681	-0.0566996	4	4	P2	0.632218	-0.01889	2	2	P2	0.0668681	0.127826	4	4	P2	0.442701	0.0821707	4	4	P2	0.0692233	0.113234	2	2	P1	0.435951	0.502476	5	5	P1	0.0870467	2.0941	1	1	P2	0.0707032	0.823409	2	2
ARL5A	P1P2	0.416821	-0.000941652	5	5	P1P2	0.969145	0.00246568	3	3	P1P2	0.97661	-0.0100938	3	3	P1P2	0.236414	0.104844	4	4	P1P2	0.605824	0.0270526	3	3	P1P2	0.0841862	0.113201	2	2	P1P2	0.156342	0.735502	3	3	P1P2	0.587464	0.348542	3	3	P1P2	0.210839	0.821237	2	2
pseudo_12365	pseudo_transcript_0	0.50427	-0.040114	2	2	pseudo_transcript_0	0.513528	-0.0355799	5	5	pseudo_transcript_0	0.48116	-0.0232932	2	2	pseudo_transcript_0	0.437387	-0.0556291	5	5	pseudo_transcript_0	0.0661458	0.116429	3	3	pseudo_transcript_0	0.15751	0.11319	1	1	pseudo_transcript_0	0.390313	0.601305	1	1	pseudo_transcript_0	0.225397	0.700842	2	2
pseudo_13288	pseudo_transcript_0	0.444909	0.0967619	3	3	pseudo_transcript_0	0.846145	0.00533451	3	3	pseudo_transcript_0	0.231517	0.0757148	1	1	pseudo_transcript_0	0.521917	0.0584457	5	5	pseudo_transcript_0	0.0906011	0.12995	4	4	pseudo_transcript_0	0.15751	0.11319	1	1	pseudo_transcript_0	0.0819943	1.37012	6	6	pseudo_transcript_0	0.117971	0.891568	4	4	pseudo_transcript_0	0.0675383	0.79951	3	3
pseudo_16415	pseudo_transcript_0	0.723378	0.0273644	2	2	pseudo_transcript_0	0.476787	0.0435677	3	3						pseudo_transcript_0	0.622943	-0.0340311	2	2	pseudo_transcript_0	0.0479357	-0.110117	6	6	pseudo_transcript_0	0.15751	0.11319	1	1	pseudo_transcript_0	0.114981	-0.747886	3	3	pseudo_transcript_0	0.635811	0.307832	4	4	pseudo_transcript_0	0.665742	-0.231949	1	1
pseudo_2682	pseudo_transcript_0	0.187067	-0.0687263	4	4	pseudo_transcript_0	0.944852	-0.0131082	4	4	pseudo_transcript_0	0.312269	-0.0336577	3	3	pseudo_transcript_0	0.46871	0.0990497	6	6	pseudo_transcript_0	0.940211	-0.00327701	4	4	pseudo_transcript_0	0.0977857	0.113183	2	2	pseudo_transcript_0	0.427347	0.676108	5	5	pseudo_transcript_0	0.371774	0.452013	3	3	pseudo_transcript_0	0.678712	0.282486	2	2
FAM101A	P1P2	0.384196	-0.0378911	3	3	P1P2	0.171569	0.10918	1	1	P1P2	0.95367	0.00851829	1	1	P1P2	0.411688	0.0649252	3	3	P1P2	0.639062	0.0914453	4	4	P1P2	0.198075	0.11318	2	2	P1P2	0.856572	-0.110884	5	5	P1P2	0.838772	0.144377	1	1	P1P2	0.996764	0.042911	1	1
UGP2	P1P2	0.591562	0.0566946	4	4	P1P2	0.0996786	-0.158165	4	4	P1P2	0.252927	-0.0710491	2	2	P1P2	0.98328	0.0600079	5	5	P1P2	0.226277	0.0976449	2	2	P1P2	0.0741734	0.113172	2	2	P1P2	0.536679	0.574156	4	4	P1P2	0.538152	-0.526406	1	1	P1P2	0.909573	-0.0176394	1	1
pseudo_15755	pseudo_transcript_0	0.505813	-0.0462112	4	4	pseudo_transcript_0	0.710928	-0.065211	5	5	pseudo_transcript_0	0.508733	-0.0244735	2	2	pseudo_transcript_0	0.149741	0.12407	4	4	pseudo_transcript_0	0.84099	0.0180935	6	6	pseudo_transcript_0	0.045816	0.113171	2	2	pseudo_transcript_0	0.403388	1.04112	5	5	pseudo_transcript_0	0.664886	0.485949	4	4	pseudo_transcript_0	0.316406	0.65994	2	2
DEXI	P1P2	0.399839	0.0262409	4	4	P1P2	0.0994698	-0.205346	1	1						P1P2	0.942811	-0.0188105	5	5	P1P2	0.116229	0.208873	1	1	P1P2	0.157946	0.113133	1	1	P1P2	0.311711	-0.573631	2	2	P1P2	0.859211	-0.163839	1	1
DOCK6	P1P2	0.298519	-0.0481845	5	5	P1P2	0.642737	-0.02336	5	5	P1P2	0.0991844	-0.0685597	2	2	P1P2	0.541396	0.108568	4	4	P1P2	0.867913	0.00729679	3	3	P1P2	0.0587224	0.113114	2	2	P1P2	0.932069	0.0394685	2	2	P1P2	0.715761	0.1743	4	4	P1P2	0.864722	0.111881	1	1
pseudo_2895	pseudo_transcript_0	0.676856	-0.0542964	6	6	pseudo_transcript_0	0.483953	-0.026379	4	4	pseudo_transcript_0	0.89255	0.00733495	3	3	pseudo_transcript_0	0.856687	-0.020422	6	6	pseudo_transcript_0	0.0769558	0.163376	4	4	pseudo_transcript_0	0.084323	0.113016	4	4	pseudo_transcript_0	0.613995	0.00232033	5	5	pseudo_transcript_0	0.41556	0.525857	3	3	pseudo_transcript_0	0.326196	0.615298	2	2
pseudo_1221	pseudo_transcript_0	0.108549	-0.102434	4	4	pseudo_transcript_0	0.288353	-0.0508974	4	4	pseudo_transcript_0	0.167876	-0.0578211	3	3	pseudo_transcript_0	0.0631465	0.147769	6	6	pseudo_transcript_0	0.567043	0.0694152	6	6	pseudo_transcript_0	0.0632745	0.113006	6	6	pseudo_transcript_0	0.414501	0.142471	5	5	pseudo_transcript_0	0.792809	0.338063	5	5	pseudo_transcript_0	0.835601	0.154515	4	4
pseudo_14687	pseudo_transcript_0	0.986873	-0.00411394	5	5	pseudo_transcript_0	0.527104	0.0348553	4	4	pseudo_transcript_0	0.621303	0.0279496	2	2	pseudo_transcript_0	0.0540346	0.140089	2	2	pseudo_transcript_0	0.862912	0.00196228	6	6	pseudo_transcript_0	0.158382	0.112964	1	1	pseudo_transcript_0	0.214913	0.982671	4	4	pseudo_transcript_0	0.68838	0.148915	3	3
pseudo_16125	pseudo_transcript_0	0.0859052	0.103684	3	3	pseudo_transcript_0	0.346265	-0.0747423	1	1						pseudo_transcript_0	0.841788	0.0150027	2	2	pseudo_transcript_0	0.655605	0.0282966	3	3	pseudo_transcript_0	0.158382	0.112964	1	1	pseudo_transcript_0	0.040291	1.53974	2	2	pseudo_transcript_0	0.671651	-0.348271	1	1
pseudo_16995	pseudo_transcript_0	0.684761	0.0353714	5	5	pseudo_transcript_0	0.170783	-0.0781122	3	3	pseudo_transcript_0	0.528684	-0.0163343	2	2	pseudo_transcript_0	0.196925	0.0941913	4	4	pseudo_transcript_0	0.0492971	0.168524	2	2	pseudo_transcript_0	0.158382	0.112964	1	1	pseudo_transcript_0	0.124766	1.18434	2	2	pseudo_transcript_0	0.979406	-0.141698	2	2
pseudo_5725	pseudo_transcript_0	0.135743	0.0952382	5	5	pseudo_transcript_0	0.919555	0.00121057	2	2	pseudo_transcript_0	0.866513	0.0141058	2	2	pseudo_transcript_0	0.0951265	0.106582	4	4	pseudo_transcript_0	0.224036	0.13088	1	1	pseudo_transcript_0	0.158382	0.112964	1	1	pseudo_transcript_0	0.0270244	1.64676	5	5
pseudo_639	pseudo_transcript_0	0.0513109	0.107586	4	4	pseudo_transcript_0	0.306238	0.0492056	2	2	pseudo_transcript_0	0.248957	0.0733991	1	1	pseudo_transcript_0	0.312298	0.0472409	3	3	pseudo_transcript_0	0.655698	0.0235407	4	4	pseudo_transcript_0	0.158382	0.112964	1	1	pseudo_transcript_0	0.0287471	1.72322	6	6	pseudo_transcript_0	0.399957	-0.87119	2	2	pseudo_transcript_0	0.614905	-0.298093	2	2
pseudo_7516	pseudo_transcript_0	0.105304	0.097394	4	4	pseudo_transcript_1	0.565892	0.0273548	2	2	pseudo_transcript_1	0.57479	-0.0219994	1	1	pseudo_transcript_1	0.687857	-0.0219493	2	2	pseudo_transcript_0	0.084069	0.132384	2	2	pseudo_transcript_0	0.158382	0.112964	1	1	pseudo_transcript_0	0.245458	0.84879	5	5	pseudo_transcript_0	0.085375	2.40881	1	1	pseudo_transcript_0	0.13604	1.16332	1	1
TXNL4B	P1P2	0.0709551	-0.097876	5	5	P1P2	0.104445	-0.102623	2	2						P1P2	0.587994	0.0326562	4	4	P1P2	0.0794088	0.165715	5	5	P1P2	0.0872398	0.112935	2	2	P1P2	0.487634	-0.393542	3	3	P1P2	0.967749	-0.0424053	1	1
GGT1	P2	0.35551	-0.0765275	7	7	P1	0.681894	0.0268407	5	5	P2	0.636646	-0.0176323	6	6	P1	0.102379	0.14193	6	6	P1	0.498474	0.0838761	5	5	P1	0.128987	0.112903	5	5	P1	0.271907	0.637378	5	5	P1	0.242448	0.561066	5	5	P1	0.462996	0.440221	4	4
pseudo_6141	pseudo_transcript_0	0.496427	-0.0273472	6	6	pseudo_transcript_0	0.187097	-0.0912852	4	4	pseudo_transcript_0	0.154477	-0.0593098	4	4	pseudo_transcript_0	0.0409835	0.146678	5	5	pseudo_transcript_0	0.100433	0.107765	5	5	pseudo_transcript_0	0.0699921	0.112861	4	4	pseudo_transcript_0	0.0994724	0.733255	4	4	pseudo_transcript_0	0.593698	-0.372077	3	3	pseudo_transcript_0	0.907576	-0.208611	2	2
pseudo_8316	pseudo_transcript_0	0.0447762	-0.141044	5	5	pseudo_transcript_0	0.66505	-0.0183538	5	5	pseudo_transcript_0	0.0559383	-0.0662454	4	4	pseudo_transcript_0	0.518778	0.0383706	5	5	pseudo_transcript_0	0.0748912	0.20822	4	4	pseudo_transcript_0	0.0155715	0.1128	3	3	pseudo_transcript_0	0.317214	-0.373777	4	4	pseudo_transcript_0	0.105552	0.800614	3	3	pseudo_transcript_0	0.923496	0.00124276	2	2
SLC25A37	P1P2	0.753761	-0.0293206	6	6	P1P2	0.943105	-0.00661303	4	4	P1P2	0.682996	0.0180264	3	3	P1P2	0.0333097	0.12996	5	5	P1P2	0.357964	0.0676563	3	3	P1P2	0.045816	0.112768	2	2	P1P2	0.722227	-0.0198817	6	6	P1P2	0.27459	0.587544	3	3	P1P2	0.231048	0.577464	3	3
pseudo_361	pseudo_transcript_0	0.0468184	-0.121023	3	3	pseudo_transcript_0	0.864694	-0.028723	7	7	pseudo_transcript_0	0.378518	-0.0218059	3	3	pseudo_transcript_0	0.0494483	0.106012	5	5	pseudo_transcript_0	0.246228	0.0800281	6	6	pseudo_transcript_0	0.0684959	0.112765	5	5	pseudo_transcript_0	0.927149	-0.0741998	3	3	pseudo_transcript_0	0.165531	0.841935	5	5	pseudo_transcript_0	0.762329	-0.183026	2	2
FDX1	P1P2	0.50754	-0.0562767	6	6	P1P2	0.576734	-0.0469675	6	6	P1P2	0.281184	-0.055223	4	4	P1P2	0.0377712	0.0852159	8	8	P1P2	0.948631	0.0182282	8	8	P1P2	0.18401	0.112758	6	6	P1P2	0.068933	1.28943	6	6	P1P2	0.999535	0.74505	5	5	P1P2	0.136208	0.851677	3	3
G6PC	P1P2	0.11485	-0.162373	1	1	P1P2	0.705009	-0.029972	3	3	P1P2	0.0955758	-0.15201	1	1	P1P2	0.155106	0.138279	1	1	P1P2	0.679728	-0.0436225	3	3	P1P2	0.15882	0.112754	1	1	P1P2	0.943276	0.0199827	2	2	P1P2	0.0680682	-1.20108	4	4	P1P2	0.264194	-0.462495	2	2
H2AFV	P1P2	0.0836189	-0.0822002	4	4	P1P2	0.462951	-0.118811	4	4	P1P2	0.0337065	-0.105529	3	3	P1P2	0.589237	0.025687	4	4	P1P2	0.674534	0.0985057	4	4	P1P2	0.263822	0.112743	2	2	P1P2	0.332858	-0.60553	3	3	P1P2	0.629041	-0.319934	2	2	P1P2	0.428005	-0.490082	2	2
pseudo_6705	pseudo_transcript_0	0.0833193	-0.135793	2	2	pseudo_transcript_0	0.737766	0.0115535	3	3	pseudo_transcript_0	0.320016	-0.0320944	2	2	pseudo_transcript_0	0.502733	0.0513632	4	4	pseudo_transcript_0	0.360774	0.0608003	2	2	pseudo_transcript_0	0.070191	0.112734	2	2	pseudo_transcript_0	0.896306	0.0596492	2	2	pseudo_transcript_0	0.300146	0.669738	3	3	pseudo_transcript_0	0.144935	0.705546	2	2
pseudo_8614	pseudo_transcript_0	0.704799	-0.0388399	5	5	pseudo_transcript_0	0.269847	-0.0931716	1	1						pseudo_transcript_0	0.330994	0.0491876	6	6	pseudo_transcript_0	0.201978	0.105166	3	3	pseudo_transcript_0	0.0292953	0.112703	3	3	pseudo_transcript_0	0.188468	-0.75787	3	3	pseudo_transcript_0	0.534968	0.337874	2	2	pseudo_transcript_0	0.528198	0.371818	1	1
pseudo_16154	pseudo_transcript_0	0.339513	0.0718108	7	7	pseudo_transcript_0	0.341134	-0.0620859	7	7	pseudo_transcript_0	0.116165	0.0739	5	5	pseudo_transcript_0	0.951138	0.0164406	7	7	pseudo_transcript_0	0.233748	0.235881	7	7	pseudo_transcript_0	0.215115	0.112693	5	5	pseudo_transcript_0	0.543606	0.998139	6	6	pseudo_transcript_0	0.0800959	0.970457	5	5	pseudo_transcript_0	0.0328012	1.06847	3	3
pseudo_13891	pseudo_transcript_0	0.100795	-0.0869318	3	3	pseudo_transcript_0	0.951459	-0.0092927	3	3	pseudo_transcript_0	0.109017	-0.083968	2	2	pseudo_transcript_0	0.385118	0.0736977	4	4	pseudo_transcript_0	0.123921	0.154571	6	6	pseudo_transcript_0	0.288757	0.112675	2	2	pseudo_transcript_0	0.62278	-0.0368678	5	5	pseudo_transcript_0	0.121493	0.921978	3	3	pseudo_transcript_0	0.439462	0.282943	3	3
SLC12A9	P2	0.588335	0.0775063	8	8	P1	0.442914	0.0316802	3	3	P1	0.553934	0.0387421	1	1	P2	0.229937	0.0779073	6	6	P1	0.612496	0.065451	4	4	P1	0.0711698	0.112675	2	2	P2	0.0457782	1.32584	7	7	P1	0.380133	-0.600344	2	2	P1	0.355048	-0.577071	1	1
pseudo_7867	pseudo_transcript_0	0.0183423	-0.242731	4	4	pseudo_transcript_0	0.14054	-0.154243	1	1	pseudo_transcript_0	0.227296	-0.0716776	1	1	pseudo_transcript_0	0.0242933	0.180514	5	5	pseudo_transcript_0	0.316161	0.0526854	4	4	pseudo_transcript_0	0.0465028	0.112668	2	2	pseudo_transcript_0	0.271432	-0.720589	4	4	pseudo_transcript_1	0.702708	-0.275981	2	2	pseudo_transcript_1	0.873594	-0.0586613	2	2
pseudo_7843	pseudo_transcript_0	0.540873	-0.11802	2	2	pseudo_transcript_0	0.300743	0.0246739	4	4						pseudo_transcript_0	0.120458	0.119251	2	2	pseudo_transcript_0	0.664902	-0.0279664	3	3	pseudo_transcript_0	0.159259	0.112668	1	1	pseudo_transcript_0	0.917523	0.137042	4	4	pseudo_transcript_0	0.575127	0.306127	2	2	pseudo_transcript_0	0.4197	0.571996	2	2
ELAVL3	P2	0.34849	-0.105349	10	10	P2	0.394336	-0.0155368	9	9	P2	0.731206	-0.0133858	9	9	P2	0.0626179	0.0612129	10	10	P1	0.313689	0.130138	7	7	P1	0.0364137	0.112651	5	5	P2	0.569822	0.435161	10	10	P2	0.133313	-0.34917	8	8	P1	0.291969	0.824985	4	4
PCDH17	P1P2	0.53518	-0.0400265	4	4	P1P2	0.157467	-0.157418	4	4	P1P2	0.115885	-0.118831	1	1	P1P2	0.969138	0.016831	5	5	P1P2	0.0473148	0.218115	8	8	P1P2	0.023721	0.11264	5	5	P1P2	0.881604	-0.0763567	3	3	P1P2	0.595782	-0.315462	3	3	P1P2	0.424234	-0.466096	1	1
COMMD10	P1P2	0.608166	0.0369619	5	5	P1P2	0.107598	0.0908623	4	4	P1P2	0.239209	0.0440394	3	3	P1P2	0.776209	0.0467602	7	7	P1P2	0.470028	0.169504	5	5	P1P2	0.0558012	0.112622	4	4	P1P2	0.451045	0.550075	5	5	P1P2	0.941816	-0.06496	3	3	P1P2	0.245074	0.490299	2	2
SLC5A10	P1P2	0.296043	0.0763164	2	2	P1P2	0.03947	-0.109666	4	4	P1P2	0.83834	-0.00599425	2	2	P1P2	0.681657	0.017298	3	3	P1P2	0.199961	0.146741	1	1	P1P2	0.159698	0.112594	1	1	P1P2	0.365144	0.699851	4	4	P1P2	0.979189	0.0181804	1	1	P1P2	0.589548	0.309742	1	1
pseudo_43	pseudo_transcript_0	0.400222	-0.033297	6	6	pseudo_transcript_0	0.0888747	-0.114034	6	6	pseudo_transcript_0	0.029109	-0.0665674	5	5	pseudo_transcript_0	0.0288517	0.125893	6	6	pseudo_transcript_0	0.00567554	0.244094	10	10	pseudo_transcript_0	0.0259702	0.112582	6	6	pseudo_transcript_0	0.320157	0.796369	6	6	pseudo_transcript_0	0.604336	0.438102	6	6	pseudo_transcript_0	0.437489	0.314306	4	4
AIM1L	P2	0.710171	-0.0159607	3	3	P2	0.329015	0.0172694	4	4	P2	0.495656	-0.0258659	2	2	P1	0.0632616	0.109794	4	4	P1	0.105057	0.0772198	5	5	P1	0.0156816	0.112581	3	3	P2	0.27932	-0.443058	4	4	P2	0.512692	-0.592212	4	4	P1	0.454134	0.255773	3	3
RBM15	P1P2	0.498268	-0.0124621	5	5	P1P2	0.936553	-0.0338353	4	4	P1P2	0.790263	-0.000118513	3	3	P1P2	0.0367163	0.101307	7	7	P1P2	0.0785119	0.194953	7	7	P1P2	0.034676	0.112572	5	5	P1P2	0.284664	0.673024	4	4	P1P2	0.524895	0.310951	3	3	P1P2	0.304105	0.449494	2	2
ANKRD63	P1P2	0.229528	0.124281	6	6	P1P2	0.920235	0.0093773	5	5	P1P2	0.394729	0.0465228	4	4	P1P2	0.27126	0.107508	4	4	P1P2	0.122005	0.207017	7	7	P1P2	0.0108069	0.112494	4	4	P1P2	0.0973543	1.1512	5	5	P1P2	0.0538845	0.63912	5	5	P1P2	0.00689551	1.05147	4	4
pseudo_12989	pseudo_transcript_0	0.294741	0.0839827	6	6	pseudo_transcript_0	0.250543	-0.0584455	4	4	pseudo_transcript_0	0.834934	0.0127686	3	3	pseudo_transcript_0	0.179761	-0.072728	3	3	pseudo_transcript_0	0.953093	-0.00423659	3	3	pseudo_transcript_0	0.160138	0.112467	1	1	pseudo_transcript_0	0.360942	0.28206	4	4	pseudo_transcript_0	0.934607	-0.324987	2	2	pseudo_transcript_0	0.11136	1.33562	1	1
pseudo_14253	pseudo_transcript_0	0.262907	0.0774208	2	2	pseudo_transcript_1	0.00818679	0.135023	3	3	pseudo_transcript_1	0.180872	0.0861981	1	1	pseudo_transcript_0	0.289443	0.0528729	3	3	pseudo_transcript_0	0.167685	0.0999533	3	3	pseudo_transcript_0	0.160138	0.112467	1	1	pseudo_transcript_1	0.175521	-0.709797	4	4	pseudo_transcript_0	0.0420732	1.34586	2	2	pseudo_transcript_0	0.11136	1.33562	1	1
pseudo_517	pseudo_transcript_0	0.34608	0.0571013	2	2	pseudo_transcript_0	0.00904183	-0.167909	5	5	pseudo_transcript_0	0.102921	-0.0652192	2	2	pseudo_transcript_0	0.458207	0.0328341	3	3	pseudo_transcript_0	0.239523	0.101558	5	5	pseudo_transcript_0	0.0467336	0.11245	2	2	pseudo_transcript_0	0.339883	0.419448	4	4	pseudo_transcript_0	0.664171	-0.385731	3	3	pseudo_transcript_0	0.541546	0.356278	1	1
pseudo_36	pseudo_transcript_0	0.32214	0.117078	2	2	pseudo_transcript_0	0.0678425	-0.100716	5	5	pseudo_transcript_0	0.136071	0.100229	1	1	pseudo_transcript_0	0.230382	0.0866914	3	3	pseudo_transcript_0	0.176334	0.119118	5	5	pseudo_transcript_0	0.0442467	0.11244	2	2	pseudo_transcript_0	0.148757	0.849828	3	3	pseudo_transcript_0	0.218682	0.910828	5	5	pseudo_transcript_0	0.154662	1.04559	2	2
LYZL1	P1P2	0.365695	-0.0371021	4	4	P1P2	0.349086	-0.0743547	1	1	P1P2	0.227996	-0.0713944	1	1	P1P2	0.377763	0.0488318	4	4	P1P2	0.453784	0.0864312	4	4	P1P2	0.0769295	0.11243	2	2	P1P2	0.267116	0.725026	4	4	P1P2	0.50934	-0.26165	5	5	P1P2	0.381652	-0.279276	3	3
OGDH	P1P2	0.0721445	-0.0898598	5	5	P1P2	0.218154	-0.122599	6	6	P1P2	0.0678228	-0.0629858	3	3	P1P2	0.524817	0.0482315	6	6	P1P2	0.0287102	0.203126	2	2	P1P2	0.0530824	0.11241	2	2	P1P2	0.0155522	-1.68108	8	8	P1P2	0.529319	0.276889	3	3	P1P2	0.539964	-0.285283	3	3
CDKN2AIP	P1P2	0.352883	0.0465924	8	8	P1P2	0.319311	-0.0585171	7	7	P1P2	0.18063	-0.0164713	6	6	P1P2	0.144569	0.0953674	9	9	P1P2	0.416167	0.0461927	6	6	P1P2	0.0498436	0.112355	5	5	P1P2	0.0951593	0.550948	7	7	P1P2	0.77357	-0.231491	5	5	P1P2	0.206096	0.571163	4	4
pseudo_15367	pseudo_transcript_0	0.175066	0.134643	4	4	pseudo_transcript_0	0.232213	0.0528028	3	3	pseudo_transcript_0	0.604851	0.0329192	1	1	pseudo_transcript_0	0.362715	0.0923217	8	8	pseudo_transcript_0	0.385376	0.0840048	2	2	pseudo_transcript_0	0.0446904	0.112354	2	2	pseudo_transcript_0	0.204071	0.757765	4	4	pseudo_transcript_0	0.476113	0.427775	3	3	pseudo_transcript_0	0.801949	0.230198	2	2
SPECC1L	P1P2	0.829946	0.00317574	5	5	P1P2	0.445936	-0.0484887	3	3	P1P2	0.850235	-0.00339177	1	1	P1P2	0.483279	-0.115367	6	6	P1P2	0.0892852	0.1518	4	4	P1P2	0.0465028	0.112284	2	2	P1P2	0.484436	-0.533468	6	6	P1P2	0.50448	0.364257	2	2
OSBPL11	P1P2	0.74576	0.00148096	6	6	P1P2	0.200461	-0.0673766	4	4	P1P2	0.217543	-0.0422487	2	2	P1P2	0.468504	0.0283915	8	8	P1P2	0.112755	0.17636	7	7	P1P2	0.0400899	0.112251	6	6	P1P2	0.406401	0.307491	5	5	P1P2	0.241516	0.745792	4	4	P1P2	0.474478	0.395607	2	2
pseudo_15234	pseudo_transcript_0	0.134825	-0.137314	4	4	pseudo_transcript_0	0.347996	-0.0746976	6	6	pseudo_transcript_0	0.011242	-0.117896	3	3	pseudo_transcript_0	0.50118	0.0981058	5	5	pseudo_transcript_0	0.460732	0.0723896	9	9	pseudo_transcript_0	0.0422794	0.11224	5	5	pseudo_transcript_0	0.468886	-0.486014	5	5	pseudo_transcript_0	0.4659	-0.827138	6	6	pseudo_transcript_0	0.433913	-0.177675	4	4
pseudo_7246	pseudo_transcript_0	0.478019	0.00650017	7	7	pseudo_transcript_0	0.142704	-0.0702516	4	4	pseudo_transcript_0	0.957353	-0.00397704	4	4	pseudo_transcript_0	0.130048	0.111049	7	7	pseudo_transcript_0	0.0209497	0.213032	5	5	pseudo_transcript_0	0.0512263	0.112144	4	4	pseudo_transcript_0	0.898152	1.11045	8	8	pseudo_transcript_0	0.109664	0.906428	3	3	pseudo_transcript_0	0.0179638	1.76047	2	2
HOXA1	P1P2	0.227464	-0.0848051	4	4	P1P2	0.572764	-0.0691978	6	6	P1P2	0.373666	-0.0415767	1	1	P1P2	0.243934	0.0523737	6	6	P1P2	0.265956	0.0790747	5	5	P1P2	0.0975153	0.112126	5	5	P1P2	0.282933	-0.543638	5	5	P1P2	0.601008	0.255051	3	3	P1P2	0.64669	-0.248371	1	1
MYL12B	P1P2	0.71009	0.0359206	5	5	P1P2	0.294257	-0.0566662	3	3	P1P2	0.199222	-0.0376563	3	3	P1P2	0.143966	0.131837	4	4	P1P2	0.316499	0.0695913	2	2	P1P2	0.0500678	0.112089	2	2	P1P2	0.0737138	0.886534	3	3	P1P2	0.497442	-0.422007	2	2	P1P2	0.353751	0.37114	2	2
GPNMB	P2	0.490667	0.00743011	9	9	P2	0.0636062	-0.145952	7	7	P2	0.0302501	-0.091366	6	6	P1	0.0308475	-0.0519635	7	7	P2	0.113593	0.075123	9	9	P2	0.302213	0.112068	7	7	P1	0.348347	-0.140003	7	7	P2	0.710377	0.0595239	7	7	P1	0.451964	-0.447061	4	4
GAS2	ENST00000454584.2	0.231991	0.0794697	5	5	ENST00000278187.3	0.351756	0.0826605	5	5	ENST00000433790.1	0.575006	0.0464781	5	5	ENST00000278187.3	0.292664	0.0314222	6	6	ENST00000454584.2	0.209893	0.140671	1	1	ENST00000454584.2	0.16058	0.112063	1	1	ENST00000454584.2	0.12273	1.27761	3	3	ENST00000454584.2	0.776159	-0.260914	1	1	ENST00000454584.2	0.122235	1.24837	1	1
pseudo_14637	pseudo_transcript_0	0.107179	-0.141775	5	5	pseudo_transcript_0	0.494233	-0.121422	6	6	pseudo_transcript_0	0.0376598	-0.0902834	3	3	pseudo_transcript_0	0.965604	-0.0337698	5	5	pseudo_transcript_0	0.823123	0.0182223	3	3	pseudo_transcript_0	0.161022	0.11203	1	1	pseudo_transcript_0	0.913149	0.102802	5	5	pseudo_transcript_0	0.89068	0.228162	4	4	pseudo_transcript_0	0.364262	-0.374125	2	2
pseudo_9225	pseudo_transcript_0	0.146065	-0.109592	4	4	pseudo_transcript_0	0.141593	-0.0730633	3	3	pseudo_transcript_0	0.030811	-0.119035	2	2	pseudo_transcript_0	0.710998	0.0579994	2	2	pseudo_transcript_0	0.341819	0.0722213	2	2	pseudo_transcript_0	0.161022	0.11203	1	1	pseudo_transcript_0	0.891888	-0.00118842	4	4	pseudo_transcript_0	0.613416	-0.372148	2	2	pseudo_transcript_0	0.399963	-0.507357	1	1
pseudo_3182	pseudo_transcript_0	0.219223	-0.0865303	5	5	pseudo_transcript_0	0.216318	0.053031	6	6	pseudo_transcript_0	0.357595	-0.0327957	4	4	pseudo_transcript_0	0.879318	-0.0681453	7	7	pseudo_transcript_0	0.0929168	0.0917244	6	6	pseudo_transcript_0	0.287479	0.112009	5	5	pseudo_transcript_0	0.359896	-0.265046	4	4	pseudo_transcript_0	0.225668	0.746579	4	4	pseudo_transcript_0	0.389014	-0.351589	2	2
TCEA3	P1P2	0.146698	-0.0865404	8	8	P1P2	0.542669	-0.0301735	6	6	P1P2	0.09061	-0.0766512	6	6	P1P2	0.0673573	0.163824	9	9	P1P2	0.822441	-0.10872	9	9	P1P2	0.0879524	0.111996	8	8	P1P2	0.162097	0.25244	7	7	P1P2	0.23997	-1.45998	6	6	P1P2	0.876313	0.150518	5	5
pseudo_11071	pseudo_transcript_0	0.00393132	-0.186972	5	5	pseudo_transcript_0	0.646963	-0.0259638	5	5	pseudo_transcript_0	0.0113586	-0.111644	4	4	pseudo_transcript_0	0.00707027	0.202192	7	7	pseudo_transcript_0	0.725586	0.0394697	6	6	pseudo_transcript_0	0.0610234	0.111947	5	5	pseudo_transcript_0	0.694914	-0.328977	5	5	pseudo_transcript_0	0.91235	0.324667	5	5	pseudo_transcript_0	0.412811	-0.181127	4	4
pseudo_13911	pseudo_transcript_0	0.211415	-0.0690405	4	4	pseudo_transcript_0	0.690195	-0.0064171	5	5	pseudo_transcript_0	0.907047	0.0018033	2	2	pseudo_transcript_0	0.497856	0.157615	6	6	pseudo_transcript_0	0.18379	0.126131	9	9	pseudo_transcript_0	0.136661	0.111888	5	5	pseudo_transcript_0	0.744387	0.161976	3	3	pseudo_transcript_0	0.34305	0.503354	5	5	pseudo_transcript_0	0.797842	0.188677	3	3
ATP5L	P1P2	0.0373267	-0.137694	2	2	P1P2	0.105242	-0.191323	1	1						P1P2	0.855428	0.00905967	3	3	P1P2	0.602492	0.0804697	2	2	P1P2	0.161465	0.111876	1	1	P1P2	0.052791	-1.12725	2	2	P1P2	0.112192	0.784228	3	3	P1P2	0.977348	0.0605679	1	1
FAM9B	ENST00000428477.1	0.0969673	-0.0257746	7	7	ENST00000327220.5	0.769551	-0.00187228	3	3	ENST00000327220.5	0.418088	-0.0367246	1	1	ENST00000327220.5	0.111918	-0.120427	4	4	ENST00000327220.5	0.155825	0.0787718	3	3	ENST00000428477.1	0.0325484	0.111788	3	3	ENST00000327220.5	0.0617665	-0.818456	4	4	ENST00000428477.1	0.414015	0.385152	4	4	ENST00000327220.5	0.344595	-0.584861	1	1
[truncated: 36,560 more rows]

## Sheet: zol-graph
gene	r avg3 average phenotype of strongest 3	r avg3 Mann-Whitney p-value
ACAT2	0.360173	6.42451e-05
[truncated: 37,809 more rows]
